# Supplementary material for: miRNA Expression Profiles in Isolated Ventricular Cardiomyocytes: Insights into Doxorubicin-Induced Cardiotoxicity
Source: MDPI journal article supplement (doi:10.3390/ijms25105272), 2024-05-12
Supplement: s1 [file s1]

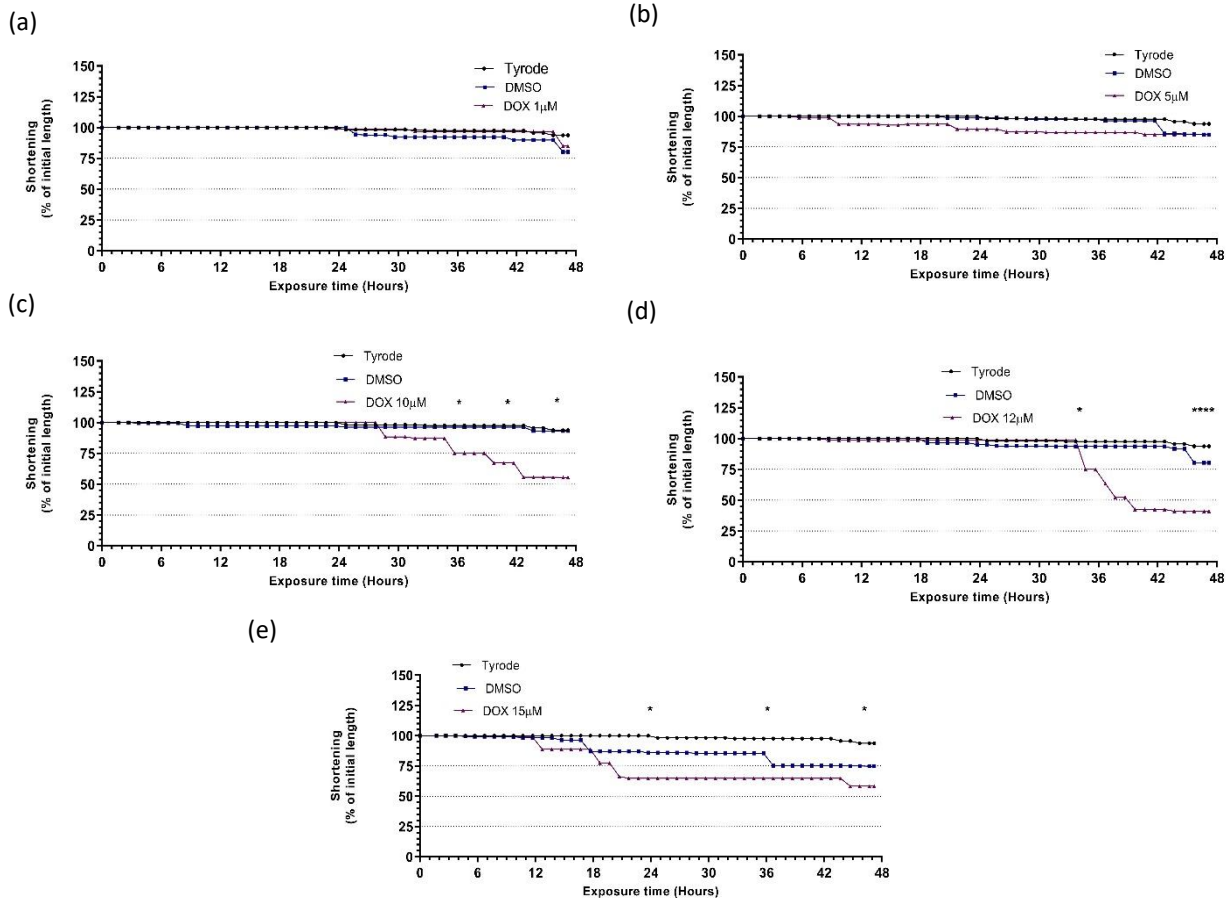

**Figure S1.** DOX induces the shortening of *Cavia porcellus* cardiomyocytes. We exposed isolated cardiomyocytes to DOX concentrations (1-15  $\mu\text{M}$ ). Shortening percentage of cardiomyocytes during 48 hours of exposure to a) 1  $\mu\text{M}$  of DOX, b) 5  $\mu\text{M}$  of DOX, c) 10  $\mu\text{M}$  of DOX, d) 12  $\mu\text{M}$  of DOX, e) 15  $\mu\text{M}$  of DOX. Data were analyzed using a two-way ANOVA parametric statistical test ( $p < 0.05$ ,  $n = 10$  cardiomyocytes per group)—representative graphs of three experiments.

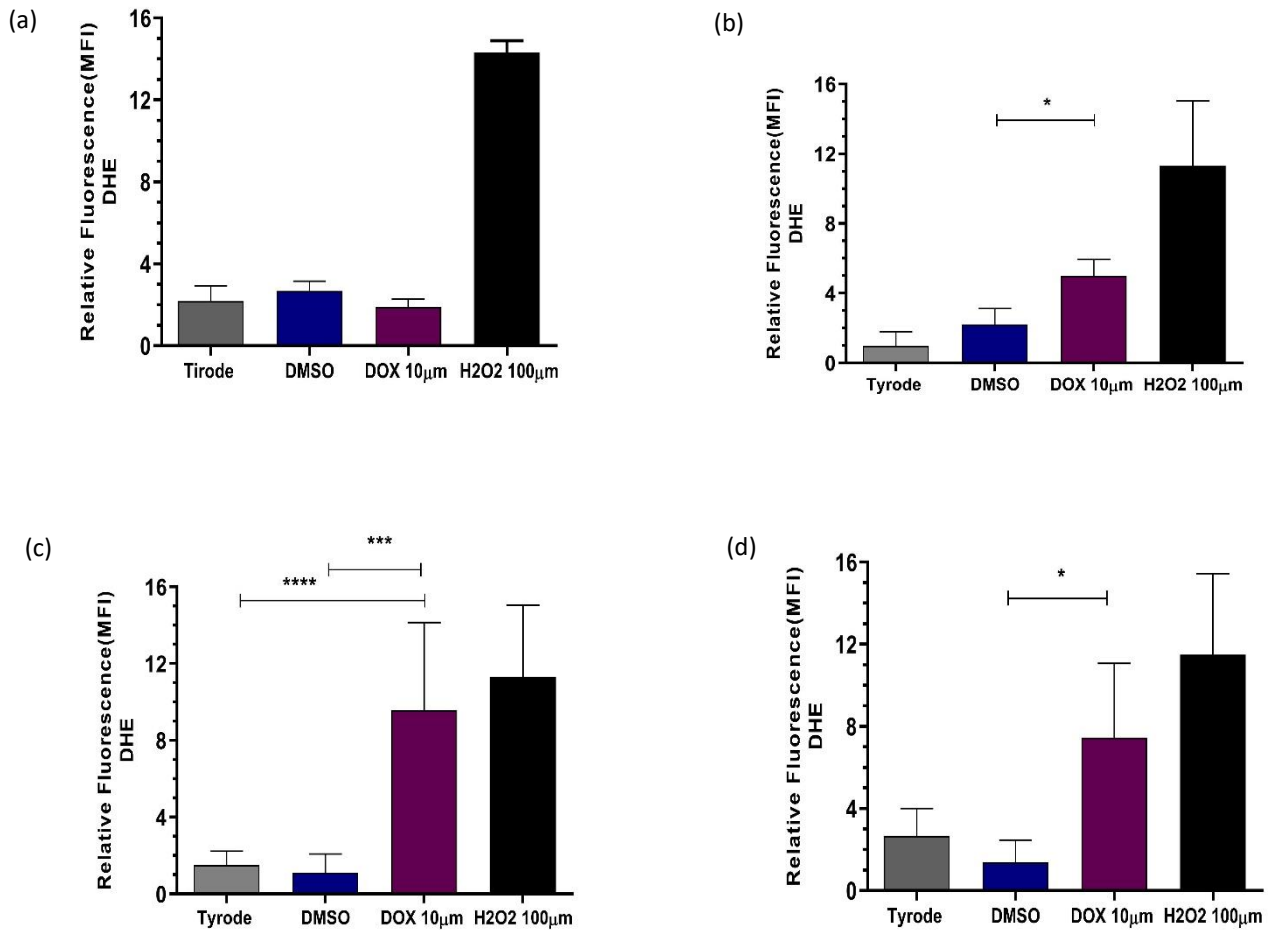

**Figure S2.** DOX induces an increase in ROS level in *Cavia porcellus* cardiomyocytes. We exposed isolated cardiomyocytes to DOX 10  $\mu$ M for varying durations (1-30 hours). ROS production in cardiomyocytes exposed to DOX at: a) 1 hour, b) 12 hours c) 24 hours d) 30 hours. Data were analyzed using two-way ANOVA parametric statistical test ( $p < 0.05$ ,  $n = 10$  cardiomyocytes per group)—representative graphs of three different experiments.

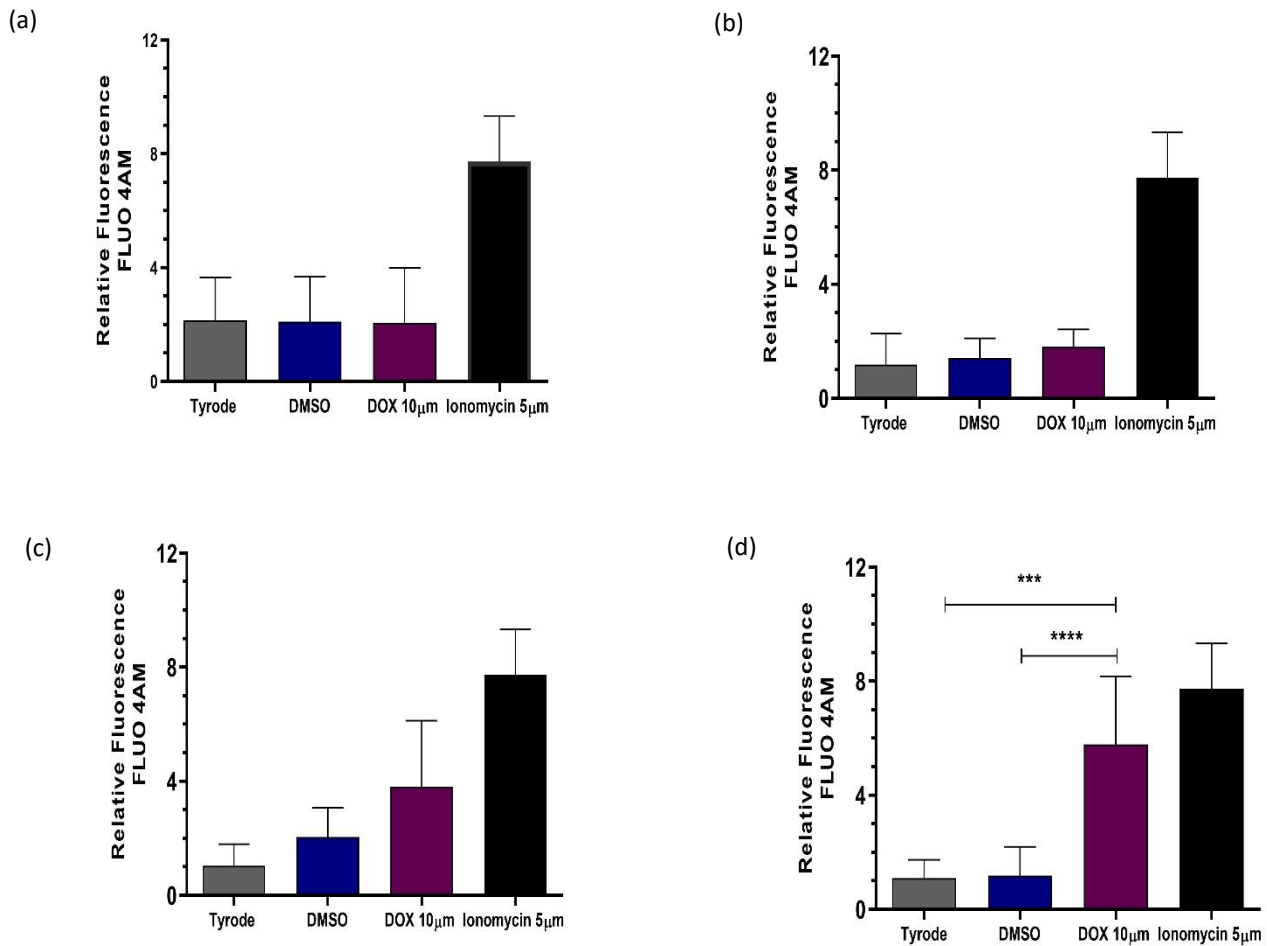

**Figure S3.** Exposure to DOX increases intracellular ( $\text{Ca}^{2+}$ ) levels in *Cavia porcellus* cardiomyocytes. We exposed isolated cardiomyocytes to DOX 10  $\mu$ M, and we evaluated intracellular calcium levels for varying durations (1-30 hours). ROS levels analyzed with DHE in cardiomyocytes exposed to DOX at: a) 1 hour, b) 12 hours c) 24 hours d) 30 hours. Data were analyzed using two-way ANOVA parametric statistical test ( $p < 0.05$ ,  $n = 10$  cardiomyocytes per group)—representative graphs of three different experiments.

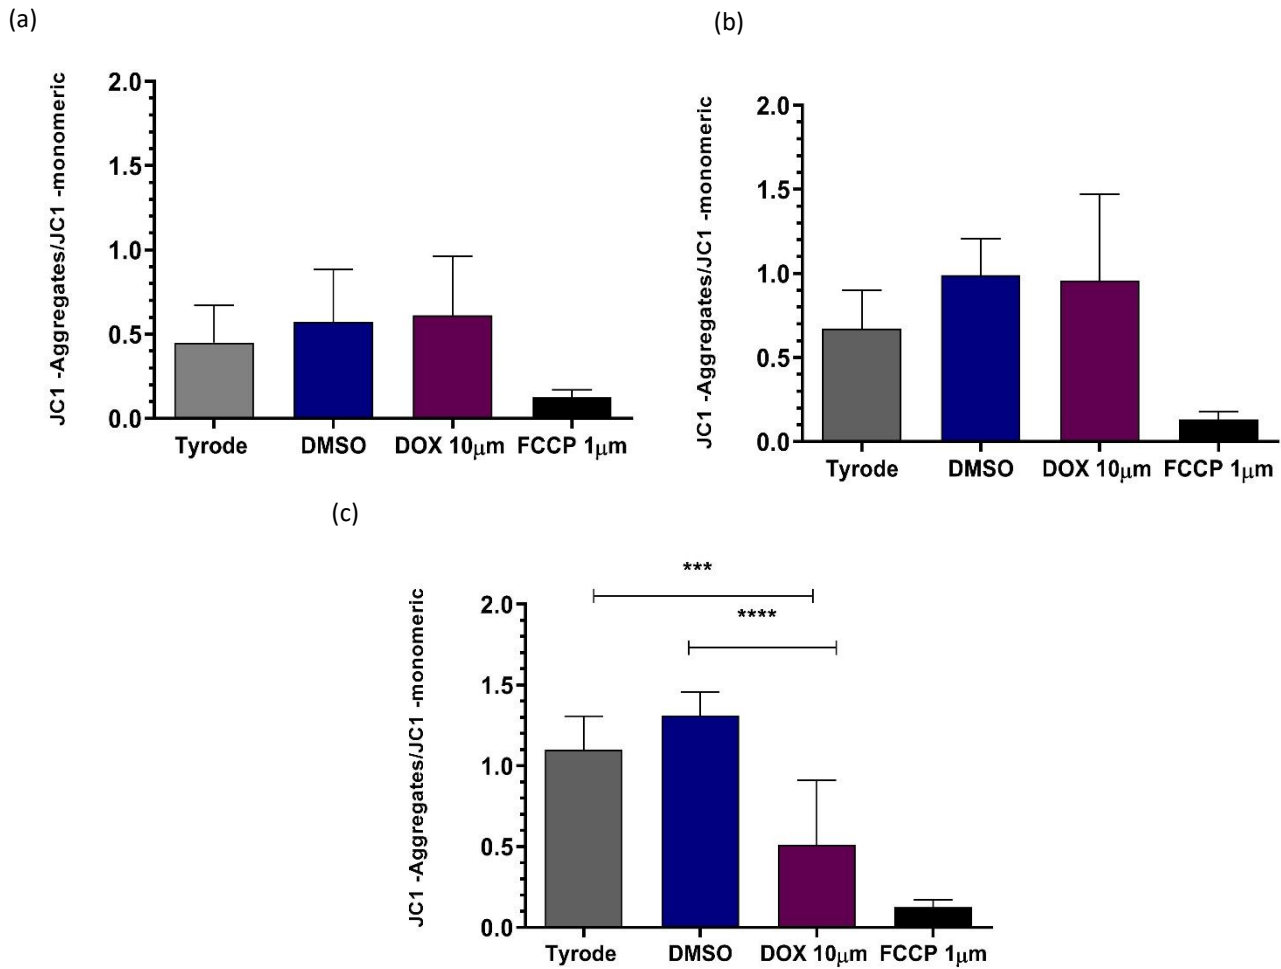

**Figure S4.** Alteration of mitochondrial membrane potential by exposure to 10 $\mu$ M DOXO. We exposed isolated cardiomyocytes to DOX at the indicated concentration, and we evaluated the potential membrane for varying durations (1-30 hours). Mitochondrial membrane potential ( $\Delta\Psi_m$ ) analyzed with JC1 in cardiomyocytes exposed to DOX at: a) 1 hour, b) 12 hours c) 30 hours. Data were analyzed using two-way ANOVA parametric statistical test ( $p < 0.05$ ,  $n = 10$  cardiomyocytes per group)—representative graphs of three different experiments.
