# Supplementary material for: miRNA Expression Profiles in Isolated Ventricular Cardiomyocytes: Insights into Doxorubicin-Induced Cardiotoxicity
Source: Int J Mol Sci. 2024 May 12;25(10):5272. doi: 10.3390/ijms25105272 (PMC11121573; doi:10.3390/ijms25105272)
Supplement: Supplementary file 1 [file ijms-25-05272-s001.zip › Tabla S1. 1h Network ClueGO CluePedia Analysis.xlsx]

## Sheet: CluePedia MTI
MTI CluePedia Network analysis
Summary Statistics			CluePedia enrich: All MTI for each miRNA, up to 300 genes, DB mirTarBase (15.06.2016) and mirecords (2010.11.25), Score=0.6
Number of nodes: 1466
Number of edges: 1693
Avg. number of neighbors: 2,271
Network diameter: 6
Network radius: 3
Characteristic path length: 3,629
Clustering coefficient: 0,000
Network density: 0,002
Network heterogeneity: 7,519
Network centralization: 0,225
Connected components: 1
Analysis time (sec): 0,585
Cluster #1 up		Cluster #2 down
hsa-miR-181b-3p		hsa-miR-34a-5p
hsa-miR-127-5p		hsa-miR-27a-5p
hsa-miR-23b-3p		hsa-miR-181a-5p
hsa-let-7d-5p		hsa-miR-148b-5p
hsa-miR-99b-5p
hsa-miR-133a-3p

## Sheet: CluePedia MTI node
%Genes Cluster #	%Genes Cluster #1	%Genes Cluster #2	AverageShortestPathLength	BetweennessCentrality	CEREBRAL_DOWNSTRAM_INFO	CEREBRAL_DOWNSTRAM_INFO_ALL	CEREBRAL_LOCALIZATION_INFO	CEREBRAL_LOCALIZATION_INFO_ALL	ClosenessCentrality	Degree	Eccentricity	ENSEMBL_GENE_ID	GeneType	GOGroups	ID	Term	Input Gene ID	Interest protein	IsSingleNode	name	NeighborhoodConnectivity	NumberOfDirectedEdges	NumberOfUndirectedEdges	OverViewTerm	PartnerOfMultiEdgedNodePairs	Radiality	selected	SelfLoops	shared name	Stress	Term PValue	TopologicalCoefficient	UniProtKB_AC	UNIQUE_ID
200	0	100	2.54198	0.360329			0.Annotation definition not found in 'Homo Sapiens.properties' file	0.Annotation definition not found in 'Homo Sapiens.properties' file	0.393394	346	3			ASSOCIATED_GENE	hsa-miR-34a-5p	hsa-miR-34a-5p	NaN		false	MIMAT0000255	1.30211	0	346	ASSOCIATED_GENE	15	0.995341	false	0	MIMAT0000255	15063730		0.0335683		MIMAT0000255
200	0	100	2.54744	0.34775			0.Annotation definition not found in 'Homo Sapiens.properties' file	0.Annotation definition not found in 'Homo Sapiens.properties' file	0.392551	333	3			ASSOCIATED_GENE	hsa-miR-181a-5p	hsa-miR-181a-5p	NaN		false	MIMAT0000256	1.3211	0	333	ASSOCIATED_GENE	6	0.995325	false	0	MIMAT0000256	16046990		0.0356779		MIMAT0000256
100	100	0	2.57474	0.339841			0.Annotation definition not found in 'Homo Sapiens.properties' file	0.Annotation definition not found in 'Homo Sapiens.properties' file	0.388388	308	3			ASSOCIATED_GENE	hsa-let-7d-5p	hsa-let-7d-5p	NaN		false	MIMAT0000065	1.2671	0	308	ASSOCIATED_GENE	1	0.995242	false	0	MIMAT0000065	12041480		0.0296779		MIMAT0000065
100	100	0	2.5843	0.324155			0.Annotation definition not found in 'Homo Sapiens.properties' file	0.Annotation definition not found in 'Homo Sapiens.properties' file	0.386952	302	3			ASSOCIATED_GENE	hsa-miR-23b-3p	hsa-miR-23b-3p	NaN		false	MIMAT0000418	1.29	0	302	ASSOCIATED_GENE	2	0.995214	false	0	MIMAT0000418	12610742		0.0322222		MIMAT0000418
100	100	0	3.06758	0.118658			0.Annotation definition not found in 'Homo Sapiens.properties' file	0.Annotation definition not found in 'Homo Sapiens.properties' file	0.32599	112	5			ASSOCIATED_GENE	hsa-miR-133a	hsa-miR-133a	NaN		false	MIMAT0000427	1.25	0	112	ASSOCIATED_GENE	4	0.993754	false	0	MIMAT0000427	4608030		0.0416667		MIMAT0000427
100	100	0	2.99386	0.127259			0.Annotation definition not found in 'Homo Sapiens.properties' file	0.Annotation definition not found in 'Homo Sapiens.properties' file	0.334017	109	5			ASSOCIATED_GENE	hsa-miR-127-5p	hsa-miR-127-5p	NaN		false	MIMAT0004604	1.20183	0	109	ASSOCIATED_GENE	0	0.993976	false	0	MIMAT0004604	3348152		0.0288336		MIMAT0004604
100	100	0	3.16724	0.0613705			0.Annotation definition not found in 'Homo Sapiens.properties' file	0.Annotation definition not found in 'Homo Sapiens.properties' file	0.315733	58	5			ASSOCIATED_GENE	hsa-miR-181b-3p	hsa-miR-181b-3p	NaN		false	MIMAT0022692	1.2931	0	58	ASSOCIATED_GENE	0	0.993452	false	0	MIMAT0022692	1750586		0.0586207		MIMAT0022692
100	100	0	3.07167	0.0505224			0.Annotation definition not found in 'Homo Sapiens.properties' file	0.Annotation definition not found in 'Homo Sapiens.properties' file	0.325556	48	5			ASSOCIATED_GENE	hsa-miR-99b-5p	hsa-miR-99b-5p	NaN		false	MIMAT0000689	1.25	0	48	ASSOCIATED_GENE	0	0.993741	false	0	MIMAT0000689	605764		0.0416667		MIMAT0000689
200	0	100	3.07304	0.0512476			0.Annotation definition not found in 'Homo Sapiens.properties' file	0.Annotation definition not found in 'Homo Sapiens.properties' file	0.325411	46	5			ASSOCIATED_GENE	hsa-miR-148b-5p	hsa-miR-148b-5p	NaN		false	MIMAT0004699	1.28261	0	46	ASSOCIATED_GENE	0	0.993737	false	0	MIMAT0004699	611592		0.0471014		MIMAT0004699
200	0	100	3.36792	0.0291369			0.Annotation definition not found in 'Homo Sapiens.properties' file	0.Annotation definition not found in 'Homo Sapiens.properties' file	0.296919	31	5			ASSOCIATED_GENE	hsa-miR-27a-5p	hsa-miR-27a-5p	NaN		false	MIMAT0004501	1.48387	0	31	ASSOCIATED_GENE	0	0.992846	false	0	MIMAT0004501	1102436		0.120968		MIMAT0004501
			3.15768	0.00340227			1.Extracellular	1.Extracellular, 2.Plasma Membrane	0.316688	4	4	ENSG00000105976	GENE-processed_transcript,protein_coding	4233	MET	MET			false	4233	315.5	0	4	ASSOCIATED_NEW_GENE	2	0.993481	false	0	4233	173290		0.515574	[A0A024R728, A0A024R759, A0PJF7, B4DLF5, B5A929, B5A930, B5A931, B5A933, B5A934, B5A935, B5A936, B5A937, B5A938, B5A939, B5A940, B5A941, B5A942, B5A943, C9JKM5, E6Y365, H7C130, H7C174, P08581, Q14825, Q9UEJ3]	4233
			2.79044	0.00780457			1.Extracellular	1.Extracellular, 2.Plasma Membrane, 3.Intra Cellular	0.358366	4	4	ENSG00000148400	GENE-nonsense_mediated_decay,protein_coding,retained_intron	4851	NOTCH1	NOTCH1			false	4851	319.333	0	4	ASSOCIATED_NEW_GENE	1	0.994591	false	0	4851	507374		0.362566	[A0A7P0T8U6, A0A7P0T8W1, A0A7P0T9V1, A0A7P0TA56, A0A7P0TAK8, A0A7P0TB20, A0A7P0TBG2, A0A7P0Z4H9, A7TW83, H6VYP0, H6VYP1, H9BDU9, H9CXX2, L8EAX5, P46531, Q6IAD4, W6FHB5]	4851
			2.79044	0.00780457			1.Extracellular	1.Extracellular, 2.Plasma Membrane, 3.Intra Cellular	0.358366	4	4	ENSG00000134250	GENE-nonsense_mediated_decay,processed_transcript,protein_coding,retained_intron	4853	NOTCH2	NOTCH2			false	4853	319.333	0	4	ASSOCIATED_NEW_GENE	1	0.994591	false	0	4853	507374		0.362566	[A0A1W2PQQ5, A0A494C049, A0A494C1F1, A0A494C1H8, A0A494C1U9, D2WEZ3, Q04721, Q6IQ50, Q9UFD5, R4GN02]	4853
			2.63481	0.0285066			3.Intra Cellular	3.Intra Cellular	0.379534	4	4	ENSG00000180667	GENE-protein_coding	55432	YOD1	YOD1			false	55432	268.5	0	4	ASSOCIATED_NEW_GENE	0	0.995061	false	0	55432	1079938		0.269929	[Q5VVQ6]	55432
			3.13311	0.00251942			3.Intra Cellular	3.Intra Cellular, 4.Nuclear Membrane	0.319172	4	4	ENSG00000171791	GENE-nonsense_mediated_decay,processed_transcript,protein_coding	596	BCL2	BCL2			false	596	329	0	4	ASSOCIATED_NEW_GENE	2	0.993556	false	0	596	179336		0.522293	[A0A024R2B3, A0A024R2C4, A0A1L4AQQ4, A0A1L4AQQ5, A0A1L4AQQ8, A0A1L4AQR0, A0A1L4AQR6, A0A7I2V3S7, A0A7I2V4W1, A0A7I2V5Q7, A0A7I2V5Q9, A0N771, P10415, Q96PA0]	596
			2.43959	0.0197691			0.Annotation definition not found in 'Homo Sapiens.properties' file	0.Annotation definition not found in 'Homo Sapiens.properties' file	0.409905	4	4	ENSG00000149948	GENE-nonsense_mediated_decay,protein_coding,retained_intron	8091	HMGA2	HMGA2			false	8091	316.25	0	4	ASSOCIATED_NEW_GENE	0	0.995651	false	0	8091	1025242		0.277998	[F5H2A4, F5H2U8, F5H6H0, H0YFY4, P52926, Q1M183]	8091
			2.99932	0.0117451			3.Intra Cellular	3.Intra Cellular	0.333409	3	4	ENSG00000126261	GENE-nonsense_mediated_decay,processed_transcript,protein_coding,retained_intron	10054	UBA2	UBA2			false	10054	255.333	0	3	ASSOCIATED_NEW_GENE	0	0.99396	false	0	10054	538734		0.350805	[K7EPL2, K7ES38, K7ESK7, Q9UBT2, U3KQ55, U3KQ93]	10054
			3.13311	0.00251942			3.Intra Cellular	3.Intra Cellular	0.319172	3	4	ENSG00000111276	GENE-processed_transcript,protein_coding,retained_intron	1027	CDKN1B	CDKN1B			false	1027	329	0	3	ASSOCIATED_NEW_GENE	1	0.993556	false	0	1027	179336		0.522293	[A7KMP4, E7ES52, H7C2T1, P46527, Q6I9V6, Q708J1]	1027
			3.12355	0.00802455			2.Plasma Membrane	2.Plasma Membrane, 3.Intra Cellular	0.320149	3	4	ENSG00000134215	GENE-nonsense_mediated_decay,processed_transcript,protein_coding,retained_intron	10451	VAV3	VAV3			false	10451	220.667	0	3	ASSOCIATED_NEW_GENE	0	0.993584	false	0	10451	326608		0.346477	[A0A2X0U2Q1, E9PMJ5, H0YCG7, H0YDG2, Q9UKW4]	10451
			3.12082	0.00690918			3.Intra Cellular	3.Intra Cellular	0.320429	3	4	ENSG00000215114	GENE-nonsense_mediated_decay,processed_transcript,protein_coding	137886	UBXN2B	UBXN2B			false	137886	223	0	3	ASSOCIATED_NEW_GENE	0	0.993593	false	0	137886	336698		0.349057	[E5RGJ4, E5RJ36, H0YAX6, Q14CS0]	137886
			3.11126	0.00962863			0.Annotation definition not found in 'Homo Sapiens.properties' file	0.Annotation definition not found in 'Homo Sapiens.properties' file	0.321413	3	4	ENSG00000164729	GENE-protein_coding	146861	SLC35G3	SLC35G3			false	146861	228.333	0	3	ASSOCIATED_NEW_GENE	0	0.993622	false	0	146861	355972		0.353551	[Q8N808]	146861
			3.09625	0.0117011			1.Extracellular	1.Extracellular, 3.Intra Cellular	0.322972	3	4	ENSG00000242265	GENE-processed_transcript,protein_coding	23089	PEG10	PEG10			false	23089	228	0	3	ASSOCIATED_NEW_GENE	0	0.993667	false	0	23089	294678		0.347095	[A0A087WUL4, A0A087WX23, A0A087WXK2, A0A087WYS2, A0A087WZG9, Q86TG7]	23089
			2.79044	0.00780457			1.Extracellular	1.Extracellular, 3.Intra Cellular	0.358366	3	4	ENSG00000089597	GENE-nonsense_mediated_decay,processed_transcript,protein_coding,retained_intron	23193	GANAB	GANAB			false	23193	319.333	0	3	ASSOCIATED_NEW_GENE	0	0.994591	false	0	23193	507374		0.362566	[A0A024R592, B4DIW2, B4DSM6, B4DZ53, E9PKU7, E9PNH1, E9PQ69, F5H6X6, Q14697, Q9BS14, V9HWJ0]	23193
			3.13311	0.00251942			3.Intra Cellular	3.Intra Cellular, 4.Nuclear Membrane, 5.Nucleus	0.319172	3	4	ENSG00000096717	GENE-processed_transcript,protein_coding	23411	SIRT1	SIRT1			false	23411	329	0	3	ASSOCIATED_NEW_GENE	1	0.993556	false	0	23411	179336		0.522293	[A0A024QZQ1, A8K128, B0QZ35, E9PC49, I1Y8W7, Q96EB6]	23411
			3.04437	0.0140998			1.Extracellular	1.Extracellular, 3.Intra Cellular, 5.Nucleus	0.328475	3	4	ENSG00000164104	GENE-protein_coding,retained_intron	3148	HMGB2	HMGB2			false	3148	245.333	0	3	ASSOCIATED_NEW_GENE	0	0.993824	false	0	3148	508524		0.353083	[D6R9A6, P26583]	3148
			3.0198	0.0115778			2.Plasma Membrane	2.Plasma Membrane, 3.Intra Cellular	0.331148	3	4	ENSG00000140443	GENE-nonsense_mediated_decay,processed_transcript,protein_coding,retained_intron	3480	IGF1R	IGF1R			false	3480	248.667	0	3	ASSOCIATED_NEW_GENE	0	0.993898	false	0	3480	557194		0.348826	[C9J5X1, H0YMJ5, H0YNR0, H3BSZ8, P08069, Q3B833]	3480
			2.79044	0.00780457			1.Extracellular	1.Extracellular, 2.Plasma Membrane, 3.Intra Cellular	0.358366	3	4	ENSG00000083312	GENE-nonsense_mediated_decay,processed_transcript,protein_coding,retained_intron	3842	TNPO1	TNPO1			false	3842	319.333	0	3	ASSOCIATED_NEW_GENE	0	0.994591	false	0	3842	507374		0.362566	[A0A024RAM0, A0A7P0T944, A0A7P0T9C0, A0A7P0TBF0, A0A7P0Z4D3, E7EW37, Q92973, S4R398]	3842
			2.80273	0.010865			3.Intra Cellular	3.Intra Cellular, 4.Nuclear Membrane	0.356795	3	4	ENSG00000143815	GENE-nonsense_mediated_decay,processed_transcript,protein_coding,retained_intron	3930	LBR	LBR			false	3930	311.333	0	3	ASSOCIATED_NEW_GENE	0	0.994554	false	0	3930	499166		0.357115	[A0A024R3R5, A0A494C1L1, C9JES9, C9JXK0, Q14739]	3930
			3.10171	0.00588937			0.Annotation definition not found in 'Homo Sapiens.properties' file	0.Annotation definition not found in 'Homo Sapiens.properties' file	0.322403	3	4	ENSG00000103495	GENE-nonsense_mediated_decay,protein_coding,retained_intron	4150	MAZ	MAZ			false	4150	229.667	0	3	ASSOCIATED_NEW_GENE	0	0.99365	false	0	4150	325670		0.351795	[A0A087WWR2, H3BPU3, H3BQI4, H3BQS2, H3BRC5, H3BTS8, I3L0M3, I3L2Z5, I3L411, I3L4D3, I3L4Y2, P56270, Q59GP8]	4150
			3.34334	0.0141546			3.Intra Cellular	3.Intra Cellular	0.299102	3	4	ENSG00000143384	GENE-processed_transcript,protein_coding,retained_intron	4170	MCL1	MCL1			false	4170	160.333	0	3	ASSOCIATED_NEW_GENE	0	0.99292	false	0	4170	283086		0.336857	[A0A087WT64, A0A7I2V2W2, C8YZ26, Q03399, Q07820]	4170
			3.18362	0.00188289			3.Intra Cellular	3.Intra Cellular	0.314108	3	4	ENSG00000181690	GENE-processed_transcript,protein_coding,retained_intron	5324	PLAG1	PLAG1			false	5324	313.5	0	3	ASSOCIATED_NEW_GENE	1	0.993403	false	0	5324	154748		0.528765	[A0A024R7Z0, A7IT79, A7IT80, Q6DJT9]	5324
			3.14676	0.0069068			3.Intra Cellular	3.Intra Cellular	0.317787	3	4	ENSG00000189266	GENE-protein_coding	55629	PNRC2	PNRC2			false	55629	219.333	0	3	ASSOCIATED_NEW_GENE	0	0.993514	false	0	55629	301032		0.353863	[J3KS97, Q9NPJ4]	55629
			2.80273	0.010865			0.Annotation definition not found in 'Homo Sapiens.properties' file	0.Annotation definition not found in 'Homo Sapiens.properties' file	0.356795	3	4	ENSG00000173065	GENE-nonsense_mediated_decay,protein_coding	55731	FAM222B	FAM222B			false	55731	311.333	0	3	ASSOCIATED_NEW_GENE	0	0.994554	false	0	55731	499166		0.357115	[A0A024QZ60, B3KQ88, B3KTH5, B4DRX9, J3KSK8, J3QKY8, J3QLP2, J3QR32, J3QRM5, J3QRR9, Q8WU58]	55731
			3.13311	0.00251942			2.Plasma Membrane	2.Plasma Membrane, 3.Intra Cellular	0.319172	3	4	ENSG00000169032	GENE-nonsense_mediated_decay,protein_coding,retained_intron	5604	MAP2K1	MAP2K1			false	5604	329	0	3	ASSOCIATED_NEW_GENE	1	0.993556	false	0	5604	179336		0.522293	[A4QPA9, B4DFY5, H3BRW9, Q02750]	5604
			3.15358	0.00298241	Transcription Factor Complex		3.Intra Cellular	3.Intra Cellular, 4.Nuclear Membrane	0.3171	3	4	ENSG00000110092	GENE-protein_coding,retained_intron	595	CCND1	CCND1			false	595	319	0	3	ASSOCIATED_NEW_GENE	1	0.993494	false	0	595	173450		0.51876	[F5H437, P24385, Q5MGB2, Q6FI00]	595
			3.01297	0.0169931			3.Intra Cellular	3.Intra Cellular	0.331899	3	4	ENSG00000171848	GENE-nonsense_mediated_decay,processed_transcript,protein_coding,retained_intron	6241	RRM2	RRM2			false	6241	249	0	3	ASSOCIATED_NEW_GENE	0	0.993919	false	0	6241	559158		0.346853	[A0A286YFD6, A0A2R8Y837, A0A7P0SBL1, P31350]	6241
			3.12082	0.0136772			0.Annotation definition not found in 'Homo Sapiens.properties' file	0.Annotation definition not found in 'Homo Sapiens.properties' file	0.320429	3	4	ENSG00000165671	GENE-nonsense_mediated_decay,processed_transcript,protein_coding,retained_intron	64324	NSD1	NSD1			false	64324	217.667	0	3	ASSOCIATED_NEW_GENE	0	0.993593	false	0	64324	273236		0.340671	[A0A1D5RMR9, A0A1W2PS55, A0A3G1LEI2, A0A410SEU7, A0A6C0WF95, A4QPE5, B2RWP5, D6RA58, D6RA90, D6RBP3, D6RBV9, D6RE14, D6RG26, H7BYB0, L0R5C2, L8EAB5, Q96L73, Q96MN8]	64324
			3.11945	0.00763519			1.Extracellular	1.Extracellular, 3.Intra Cellular	0.320569	3	4	ENSG00000137267	GENE-processed_transcript,protein_coding,retained_intron	7280	TUBB2A	TUBB2A			false	7280	221.667	0	3	ASSOCIATED_NEW_GENE	0	0.993597	false	0	7280	330578		0.346415	[A5D906, A5D907, Q13885]	7280
			3.0198	0.0115778			0.Annotation definition not found in 'Homo Sapiens.properties' file	0.Annotation definition not found in 'Homo Sapiens.properties' file	0.331148	3	4	ENSG00000142634	GENE-protein_coding	79180	EFHD2	EFHD2			false	79180	248.667	0	3	ASSOCIATED_NEW_GENE	0	0.993898	false	0	79180	557194		0.348826	[A0A024QZ77, A0A024QZ82, H0Y4Y4, Q96C19]	79180
			3.08259	0.0097722			3.Intra Cellular	3.Intra Cellular	0.324402	3	4	ENSG00000116406	GENE-nonsense_mediated_decay,processed_transcript,protein_coding,retained_intron	80267	EDEM3	EDEM3			false	80267	232	0	3	ASSOCIATED_NEW_GENE	0	0.993708	false	0	80267	409382		0.347892	[H0Y498, Q9BZQ6]	80267
			2.99113	0.0174601			3.Intra Cellular	3.Intra Cellular	0.334322	3	4	ENSG00000108061	GENE-nonsense_mediated_decay,processed_transcript,protein_coding,retained_intron	8036	SHOC2	SHOC2			false	8036	255.667	0	3	ASSOCIATED_NEW_GENE	0	0.993985	false	0	8036	557628		0.348381	[Q9UQ13, X6RI37]	8036
			3.02662	0.0111228			3.Intra Cellular	3.Intra Cellular	0.330401	3	4	ENSG00000130766	GENE-protein_coding	83667	SESN2	SESN2			false	83667	246.333	0	3	ASSOCIATED_NEW_GENE	0	0.993877	false	0	83667	509658		0.347991	[P58004]	83667
			3.08259	0.0097722			0.Annotation definition not found in 'Homo Sapiens.properties' file	0.Annotation definition not found in 'Homo Sapiens.properties' file	0.324402	3	4	ENSG00000122482	GENE-processed_transcript,protein_coding	84146	ZNF644	ZNF644			false	84146	232	0	3	ASSOCIATED_NEW_GENE	0	0.993708	false	0	84146	409382		0.347892	[A0A087WZL9, A7E234, L0R5F4, Q569I6, Q8NEI6, Q9H582]	84146
			3.37474	0.00971307			0.Annotation definition not found in 'Homo Sapiens.properties' file	0.Annotation definition not found in 'Homo Sapiens.properties' file	0.296319	3	4	ENSG00000083844	GENE-protein_coding	9422	ZNF264	ZNF264			false	9422	154	0	3	ASSOCIATED_NEW_GENE	0	0.992826	false	0	9422	260748		0.34	[M0QXF3, M0QZJ4, M0QZT5, M0R146, O43296, Q14C61]	9422
			3.48532	0.00530522			3.Intra Cellular	3.Intra Cellular	0.286917	2	4	ENSG00000153094	GENE-nonsense_mediated_decay,protein_coding	10018	BCL2L11	BCL2L11			false	10018	186.5	0	2	ASSOCIATED_NEW_GENE	0	0.992491	false	0	10018	48844		0.501351	[A0A0A0MRE7, A0A0C4DH20, C9J417, E9PAM9, H7BZE5, O43521]	10018
			3.13311	0.00251942			1.Extracellular	1.Extracellular, 3.Intra Cellular	0.319172	2	4	ENSG00000086758	GENE-nonsense_mediated_decay,processed_transcript,protein_coding,retained_intron	10075	HUWE1	HUWE1			false	10075	329	0	2	ASSOCIATED_NEW_GENE	0	0.993556	false	0	10075	179336		0.522293	[A0A024R9U8, A0A024R9W5, A0A024R9Y3, A0A087X146, A0A087X1S3, A0A1B0GXC7, H0Y659, L8E996, Q3B7K0, Q5H924, Q5H935, Q5H962, Q5H963, Q5H964, Q7Z6Z7, Q8IWJ0]	10075
			3.18362	0.00188289			1.Extracellular	1.Extracellular, 2.Plasma Membrane, 3.Intra Cellular	0.314108	2	4	ENSG00000143870	GENE-processed_transcript,protein_coding	10130	PDIA6	PDIA6			false	10130	313.5	0	2	ASSOCIATED_NEW_GENE	0	0.993403	false	0	10130	154748		0.528765	[A0A384NPU5, C9JNG5, Q15084]	10130
			3.15358	0.00298241			0.Annotation definition not found in 'Homo Sapiens.properties' file	0.Annotation definition not found in 'Homo Sapiens.properties' file	0.3171	2	4	ENSG00000244462	GENE-protein_coding	10137	RBM12	RBM12			false	10137	319	0	2	ASSOCIATED_NEW_GENE	0	0.993494	false	0	10137	173450		0.51876	[A6PVI0, A6PVI1, Q5JX62, Q9NTZ6]	10137
			3.5413	0			3.Intra Cellular	3.Intra Cellular	0.282382	2	4	ENSG00000105810	GENE-processed_transcript,protein_coding,retained_intron	1021	CDK6	CDK6			false	1021	331	0	2	ASSOCIATED_NEW_GENE	1	0.992322	false	0	1021	0		0	[Q00534]	1021
			3.43345	0.00456683			3.Intra Cellular	3.Intra Cellular, 5.Nucleus	0.291252	2	4	ENSG00000124762	GENE-processed_transcript,protein_coding	1026	CDKN1A	CDKN1A			false	1026	207.5	0	2	ASSOCIATED_NEW_GENE	0	0.992648	false	0	1026	212888		0.506127	[A0A024RCX5, P38936]	1026
			3.13311	0.00251942			1.Extracellular	1.Extracellular, 3.Intra Cellular	0.319172	2	4	ENSG00000196937	GENE-protein_coding,retained_intron	10447	FAM3C	FAM3C			false	10447	329	0	2	ASSOCIATED_NEW_GENE	0	0.993556	false	0	10447	179336		0.522293	[C9JMN4, C9JP35, Q92520]	10447
			3.54676	0	Transcription Factor Complex		0.Annotation definition not found in 'Homo Sapiens.properties' file	0.Annotation definition not found in 'Homo Sapiens.properties' file	0.281948	2	4	ENSG00000165556	GENE-processed_transcript,protein_coding	1045	CDX2	CDX2			false	1045	327	0	2	ASSOCIATED_NEW_GENE	1	0.992306	false	0	1045	0		0	[A0A076MKN9, A0A0M3L9V7, Q99626]	1045
			3.5099	0.00533867			3.Intra Cellular	3.Intra Cellular	0.284909	2	4	ENSG00000159217	GENE-processed_transcript,protein_coding,retained_intron	10642	IGF2BP1	IGF2BP1			false	10642	177.5	0	2	ASSOCIATED_NEW_GENE	0	0.992417	false	0	10642	61910		0.50142	[D3DTW3, L8ECD2, Q9NZI8]	10642
			3.15358	0.00298241			3.Intra Cellular	3.Intra Cellular, 5.Nucleus	0.3171	2	4	ENSG00000136231	GENE-nonsense_mediated_decay,processed_transcript,protein_coding,retained_intron	10643	IGF2BP3	IGF2BP3			false	10643	319	0	2	ASSOCIATED_NEW_GENE	0	0.993494	false	0	10643	173450		0.51876	[F8WD15, O00425]	10643
			3.17816	0.00567528			3.Intra Cellular	3.Intra Cellular	0.314648	2	4	ENSG00000149187	GENE-processed_transcript,protein_coding,retained_intron	10658	CELF1	CELF1			false	10658	303.5	0	2	ASSOCIATED_NEW_GENE	0	0.993419	false	0	10658	170054		0.508403	[E9PKA1, E9PKU1, E9PQK4, E9PSH0, F5H0D8, F5H3J7, F5H4Y5, F5H7M7, G5EA30, Q92879]	10658
			3.13311	0.00251942			3.Intra Cellular	3.Intra Cellular, 5.Nucleus	0.319172	2	4	ENSG00000101972	GENE-nonsense_mediated_decay,processed_transcript,protein_coding,retained_intron	10735	STAG2	STAG2			false	10735	329	0	2	ASSOCIATED_NEW_GENE	0	0.993556	false	0	10735	179336		0.522293	[B1AMS8, B1AMS9, B1AMT0, B1AMT1, B1AMT2, B1AMT3, B1AMT4, E7ERE6, Q6AI02, Q6MZM3, Q6MZP3, Q8N3U4]	10735
			3.50034	0.00295828			0.Annotation definition not found in 'Homo Sapiens.properties' file	0.Annotation definition not found in 'Homo Sapiens.properties' file	0.285686	2	4	ENSG00000197714	GENE-protein_coding	10794	ZNF460	ZNF460			false	10794	182.5	0	2	ASSOCIATED_NEW_GENE	0	0.992446	false	0	10794	107572		0.505571	[M0R0J6, Q14592]	10794
			3.18362	0.00188289			3.Intra Cellular	3.Intra Cellular	0.314108	2	4	ENSG00000090612	GENE-nonsense_mediated_decay,protein_coding,retained_intron	10795	ZNF268	ZNF268			false	10795	313.5	0	2	ASSOCIATED_NEW_GENE	0	0.993403	false	0	10795	154748		0.528765	[A0A075B6T9, A0A087WV54, E7EV44, F5H1T2, F5H467, F5H670, F5H6R9, F5H7L3, F5H848, K7EIF0, K7EMS6, K7EQP6, Q14587, Q2TB61]	10795
			3.13311	0.00251942			3.Intra Cellular	3.Intra Cellular	0.319172	2	4	ENSG00000142945	GENE-processed_transcript,protein_coding	11004	KIF2C	KIF2C			false	11004	329	0	2	ASSOCIATED_NEW_GENE	0	0.993556	false	0	11004	179336		0.522293	[A0A140VKF1, B7Z6Q6, B7Z7M6, H0Y5Z9, Q5JR89, Q5JR91, Q99661]	11004
			3.18362	0.00188289			2.Plasma Membrane	2.Plasma Membrane, 3.Intra Cellular	0.314108	2	4	ENSG00000163781	GENE-nonsense_mediated_decay,processed_transcript,protein_coding,retained_intron	11073	TOPBP1	TOPBP1			false	11073	313.5	0	2	ASSOCIATED_NEW_GENE	0	0.993403	false	0	11073	154748		0.528765	[A0A2R8YD63, A0AV47, A7E2X7, I3L1F2, Q05BV8, Q92547]	11073
			3.15768	0.00340227			0.Annotation definition not found in 'Homo Sapiens.properties' file	0.Annotation definition not found in 'Homo Sapiens.properties' file	0.316688	2	4	ENSG00000105323	GENE-nonsense_mediated_decay,processed_transcript,protein_coding,retained_intron	11100	HNRNPUL1	HNRNPUL1			false	11100	315.5	0	2	ASSOCIATED_NEW_GENE	0	0.993481	false	0	11100	173290		0.515574	[A0A024R0J9, A0A087X1I2, A0A0A0MRA5, A8K3W4, B7Z4B8, L0R5B4, M0QYG9, M0QYI8, M0QYM5, M0QYZ0, M0QZV6, M0R0K8, M0R203, M0R247, M0R3F1, Q9BUJ2]	11100
			3.13311	0.00251942			3.Intra Cellular	3.Intra Cellular, 5.Nucleus	0.319172	2	4	ENSG00000076108	GENE-processed_transcript,protein_coding,retained_intron	11176	BAZ2A	BAZ2A			false	11176	329	0	2	ASSOCIATED_NEW_GENE	0	0.993556	false	0	11176	179336		0.522293	[A0A0C4DGI9, F8VU39, F8VWQ3, F8W053, H0YHL2, H0YHQ7, H0YII3, J3KPG5, J3QK86, Q9UIF9]	11176
			3.13311	0.00251942			3.Intra Cellular	3.Intra Cellular	0.319172	2	4	ENSG00000147471	GENE-nonsense_mediated_decay,protein_coding,retained_intron	11212	PLPBP	PLPBP			false	11212	329	0	2	ASSOCIATED_NEW_GENE	0	0.993556	false	0	11212	179336		0.522293	[E5RFX7, E5RFZ4, E5RG77, H0YBG2, O94903]	11212
			3.18362	0.00188289			1.Extracellular	1.Extracellular, 3.Intra Cellular	0.314108	2	4	ENSG00000165828	GENE-protein_coding	118471	PRAP1	PRAP1			false	118471	313.5	0	2	ASSOCIATED_NEW_GENE	0	0.993403	false	0	118471	154748		0.528765	[A6XND8, Q96NZ9]	118471
			3.50853	0.00337264			2.Plasma Membrane	2.Plasma Membrane, 3.Intra Cellular	0.285019	2	4	ENSG00000122705	GENE-nonsense_mediated_decay,protein_coding	1211	CLTA	CLTA			false	1211	179	0	2	ASSOCIATED_NEW_GENE	0	0.992421	false	0	1211	106646		0.504249	[C9J8P9, F8WF69, P09496, S4R3F6]	1211
			3.44437	0.00369203			1.Extracellular	1.Extracellular, 3.Intra Cellular	0.290329	2	4	ENSG00000064666	GENE-nonsense_mediated_decay,protein_coding,retained_intron	1265	CNN2	CNN2			false	1265	204	0	2	ASSOCIATED_NEW_GENE	0	0.992615	false	0	1265	165512		0.5075	[A0A087WV51, A0A087X1X5, A0A087X271, B2RWM5, B4DDF4, B4DUT8, H3BQH0, H3BVI6, K7ES69, Q6FHC3, Q6FHE4, Q99439, U3KPS3]	1265
			3.43891	0.00652964			1.Extracellular	1.Extracellular, 3.Intra Cellular	0.29079	2	4	ENSG00000122218	GENE-nonsense_mediated_decay,processed_transcript,protein_coding,retained_intron	1314	COPA	COPA			false	1314	204.5	0	2	ASSOCIATED_NEW_GENE	0	0.992632	false	0	1314	186696		0.503713	[A0A3B3IS23, A0A3B3IS84, A0A3B3ISC6, A0A3B3ISK1, A0A3B3IT15, A0A3B3ITI7, A0A3B3ITV3, A0A3B3ITX2, A0A3B3IU78, A0A3B3IU84, A0A3B3IU89, P53621]	1314
			3.43345	0.00456683			3.Intra Cellular	3.Intra Cellular	0.291252	2	4	ENSG00000206557	GENE-protein_coding	131405	TRIM71	TRIM71			false	131405	207.5	0	2	ASSOCIATED_NEW_GENE	0	0.992648	false	0	131405	212888		0.506127	[Q2Q1W2]	131405
			3.43208	0.0047573			3.Intra Cellular	3.Intra Cellular	0.291368	2	4	ENSG00000156017	GENE-protein_coding	138199	CARNMT1	CARNMT1			false	138199	208	0	2	ASSOCIATED_NEW_GENE	0	0.992652	false	0	138199	174496		0.506112	[Q5T8U9, Q5T8V1, Q8N4J0]	138199
			3.18362	0.00188289			3.Intra Cellular	3.Intra Cellular	0.314108	2	4	ENSG00000158079	GENE-processed_transcript,protein_coding	138639	PTPDC1	PTPDC1			false	138639	313.5	0	2	ASSOCIATED_NEW_GENE	0	0.993403	false	0	138639	154748		0.528765	[A0A087WTF0, A2A3K4, A8K0X7, L8ECP2]	138639
			3.15495	0.00330679			3.Intra Cellular	3.Intra Cellular	0.316962	2	4	ENSG00000176994	GENE-protein_coding	140775	SMCR8	SMCR8			false	140775	317	0	2	ASSOCIATED_NEW_GENE	0	0.99349	false	0	140775	174364		0.51634	[Q8TEV9]	140775
			3.44437	0.00369203			0.Annotation definition not found in 'Homo Sapiens.properties' file	0.Annotation definition not found in 'Homo Sapiens.properties' file	0.290329	2	4	ENSG00000183723	GENE-protein_coding,retained_intron	146223	CMTM4	CMTM4			false	146223	204	0	2	ASSOCIATED_NEW_GENE	0	0.992615	false	0	146223	165512		0.5075	[J3QRP2, Q8IZR5]	146223
			3.17816	0.00567528			0.Annotation definition not found in 'Homo Sapiens.properties' file	0.Annotation definition not found in 'Homo Sapiens.properties' file	0.314648	2	4	ENSG00000258405	GENE-protein_coding	147660	ZNF578	ZNF578			false	147660	303.5	0	2	ASSOCIATED_NEW_GENE	0	0.993419	false	0	147660	170054		0.508403	[M0QZV4, Q3MI94, Q96N58]	147660
			3.15358	0.00298241			2.Plasma Membrane	2.Plasma Membrane	0.3171	2	4	ENSG00000185436	GENE-protein_coding	163702	IFNLR1	IFNLR1			false	163702	319	0	2	ASSOCIATED_NEW_GENE	0	0.993494	false	0	163702	173450		0.51876	[Q5VTX9, Q8IU57]	163702
			3.5413	0			1.Extracellular	1.Extracellular, 2.Plasma Membrane	0.282382	2	4	ENSG00000101384	GENE-nonsense_mediated_decay,processed_transcript,protein_coding,retained_intron	182	JAG1	JAG1			false	182	331	0	2	ASSOCIATED_NEW_GENE	1	0.992322	false	0	182	0		0	[A0A087WXH5, A0A087X1E8, B5M914, B7U6M8, B7U6M9, P78504, Q4KMR2, Q99740]	182
			3.15768	0.00340227	Transcription Factor Complex		1.Extracellular	1.Extracellular, 3.Intra Cellular	0.316688	2	4	ENSG00000101412	GENE-protein_coding	1869	E2F1	E2F1			false	1869	315.5	0	2	ASSOCIATED_NEW_GENE	0	0.993481	false	0	1869	173290		0.515574	[Q01094, Q9BSD8]	1869
			3.5413	0	Transcription Factor Complex		0.Annotation definition not found in 'Homo Sapiens.properties' file	0.Annotation definition not found in 'Homo Sapiens.properties' file	0.282382	2	4	ENSG00000112242	GENE-protein_coding	1871	E2F3	E2F3			false	1871	331	0	2	ASSOCIATED_NEW_GENE	1	0.992322	false	0	1871	0		0	[A0A087X0B6, A0A3Q9JIX6, A0A3S9X9Y1, O00716, Q24JQ3, Q499G5]	1871
			3.13311	0.00251942	Transcription Factor Complex		5.Nucleus	5.Nucleus	0.319172	2	4	ENSG00000133740	GENE-nonsense_mediated_decay,protein_coding,retained_intron	1875	E2F5	E2F5			false	1875	329	0	2	ASSOCIATED_NEW_GENE	0	0.993556	false	0	1875	179336		0.522293	[C9JYE9, E5RHD4, H0YBK0, H0YBW8, Q15329]	1875
			3.15495	0.00330679	Transcription Factor Complex		3.Intra Cellular	3.Intra Cellular	0.316962	2	4	ENSG00000106546	GENE-nonsense_mediated_decay,processed_transcript,protein_coding	196	AHR	AHR			false	196	317	0	2	ASSOCIATED_NEW_GENE	0	0.99349	false	0	196	174364		0.51634	[A0A024R9Z8, A0A2R8Y7G1, L0R578, P35869]	196
			3.57406	0			3.Intra Cellular	3.Intra Cellular	0.279794	2	4	ENSG00000110321	GENE-nonsense_mediated_decay,processed_transcript,protein_coding,retained_intron	1982	EIF4G2	EIF4G2			false	1982	307	0	2	ASSOCIATED_NEW_GENE	1	0.992223	false	0	1982	0		0	[D3DQV9, E9PKF8, H0Y3P2, H0YCF8, H0YCH5, H0YD77, H0YD99, H0YDC0, H0YE22, H0YE44, H0YE87, H0YEC5, H0YEI7, H0YEN8, H0YEW3, P78344, Q2TU89]	1982
			3.18362	0.00188289			5.Nucleus	5.Nucleus	0.314108	2	4	ENSG00000164778	GENE-protein_coding	2020	EN2	EN2			false	2020	313.5	0	2	ASSOCIATED_NEW_GENE	0	0.993403	false	0	2020	154748		0.528765	[P19622]	2020
			3.13311	0.00251942			2.Plasma Membrane	2.Plasma Membrane, 3.Intra Cellular	0.319172	2	4	ENSG00000145242	GENE-protein_coding	2044	EPHA5	EPHA5			false	2044	329	0	2	ASSOCIATED_NEW_GENE	0	0.993556	false	0	2044	179336		0.522293	[A0A384MU00, B7ZKJ3, B7ZKW7, F8VP57, F8W9W0, P54756, Q59FT4]	2044
			3.18362	0.00188289			3.Intra Cellular	3.Intra Cellular	0.314108	2	4	ENSG00000178074	GENE-processed_transcript,protein_coding	205327	C2orf69	C2orf69			false	205327	313.5	0	2	ASSOCIATED_NEW_GENE	0	0.993403	false	0	205327	154748		0.528765	[Q8N8R5]	205327
			3.18362	0.00188289			3.Intra Cellular	3.Intra Cellular	0.314108	2	4	ENSG00000134954	GENE-processed_transcript,protein_coding,retained_intron	2113	ETS1	ETS1			false	2113	313.5	0	2	ASSOCIATED_NEW_GENE	0	0.993403	false	0	2113	154748		0.528765	[A8K725, B4DW78, P14921, Q6FG54, V9GYD6]	2113
			3.15495	0.00330679			3.Intra Cellular	3.Intra Cellular	0.316962	2	4	ENSG00000158604	GENE-processed_transcript,protein_coding,retained_intron	222068	TMED4	TMED4			false	222068	317	0	2	ASSOCIATED_NEW_GENE	0	0.99349	false	0	222068	174364		0.51634	[F8W7F7, Q7Z7H5]	222068
			3.13311	0.00251942			1.Extracellular	1.Extracellular, 3.Intra Cellular	0.319172	2	4	ENSG00000143149	GENE-processed_transcript,protein_coding,retained_intron	223	ALDH9A1	ALDH9A1			false	223	329	0	2	ASSOCIATED_NEW_GENE	0	0.993556	false	0	223	179336		0.522293	[P49189]	223
			3.15768	0.00340227			2.Plasma Membrane	2.Plasma Membrane, 3.Intra Cellular	0.316688	2	4	ENSG00000107864	GENE-protein_coding	22849	CPEB3	CPEB3			false	22849	315.5	0	2	ASSOCIATED_NEW_GENE	0	0.993481	false	0	22849	173290		0.515574	[B3KXC1, Q5QP71, Q8NE35]	22849
			3.18362	0.00188289			0.Annotation definition not found in 'Homo Sapiens.properties' file	0.Annotation definition not found in 'Homo Sapiens.properties' file	0.314108	2	4	ENSG00000103351	GENE-nonsense_mediated_decay,protein_coding,retained_intron	23059	CLUAP1	CLUAP1			false	23059	313.5	0	2	ASSOCIATED_NEW_GENE	0	0.993403	false	0	23059	154748		0.528765	[I3L0L1, I3L121, I3L1J4, I3L257, I3L2E1, I3L3S9, I3L455, I3L487, J3KNW5, Q96AJ1]	23059
			3.18362	0.00188289			3.Intra Cellular	3.Intra Cellular	0.314108	2	4	ENSG00000100354	GENE-processed_transcript,protein_coding,retained_intron	23112	TNRC6B	TNRC6B			false	23112	313.5	0	2	ASSOCIATED_NEW_GENE	0	0.993403	false	0	23112	154748		0.528765	[A0A024R1N5, A0A024R1T4, B0QYM5, H0Y720, L8E721, Q9UPQ9]	23112
			3.18362	0.00188289			2.Plasma Membrane	2.Plasma Membrane, 3.Intra Cellular	0.314108	2	4	ENSG00000228408	GENE-lncRNA	23118	TAB2	TAB2			false	23118	313.5	0	2	ASSOCIATED_NEW_GENE	0	0.993403	false	0	23118	154748		0.528765	[A0A1B0GV57, B4DIR9, Q9NYJ8, U3KQ62, U3KQR0]	23118
			3.13311	0.00251942			3.Intra Cellular	3.Intra Cellular	0.319172	2	4	ENSG00000164024	GENE-nonsense_mediated_decay,processed_transcript,protein_coding,retained_intron	23173	METAP1	METAP1			false	23173	329	0	2	ASSOCIATED_NEW_GENE	0	0.993556	false	0	23173	179336		0.522293	[D6RF24, H0Y903, H0Y955, H0Y9L0, H0YAI3, P53582]	23173
			3.44437	0.00369203			3.Intra Cellular	3.Intra Cellular	0.290329	2	4	ENSG00000170540	GENE-nonsense_mediated_decay,protein_coding,retained_intron	23204	ARL6IP1	ARL6IP1			false	23204	204	0	2	ASSOCIATED_NEW_GENE	0	0.992615	false	0	23204	165512		0.5075	[A0A024QYV7, H3BPJ2, H3BS91, H3BTX6, Q15041]	23204
			3.5058	0.00148416			0.Annotation definition not found in 'Homo Sapiens.properties' file	0.Annotation definition not found in 'Homo Sapiens.properties' file	0.285241	2	4	ENSG00000163714	GENE-nonsense_mediated_decay,processed_transcript,protein_coding,retained_intron	23350	U2SURP	U2SURP			false	23350	181	0	2	ASSOCIATED_NEW_GENE	0	0.99243	false	0	23350	76684		0.507042	[C9J5L1, C9JDJ7, E7ET15, E7EW00, H0Y8D9, H7C4V2, L8E737, O15042, U3KPT1]	23350
			3.15358	0.00298241			3.Intra Cellular	3.Intra Cellular	0.3171	2	4	ENSG00000164073	GENE-nonsense_mediated_decay,processed_transcript,protein_coding,retained_intron	256471	MFSD8	MFSD8			false	256471	319	0	2	ASSOCIATED_NEW_GENE	0	0.993494	false	0	256471	173450		0.51876	[A0A286YER2, A0A286YEV4, A0A286YEV9, A0A286YEW2, A0A286YEW6, A0A286YEW7, A0A286YEW8, A0A286YEX1, A0A286YEY8, A0A286YF00, A0A286YF45, A0A286YF51, A0A286YF72, A0A286YF73, A0A286YF82, A0A286YF93, A0A286YFB5, A0A286YFC6, A0A286YFE6, A0A286YFE7, A0A286YFF1, A0A286YFF5, A0A286YFG7, A0A286YFH3, A0A286YFH9, A0A286YFI8, A0A286YFI9, A0A286YFJ5, A0A286YFK4, A0A286YFM2, A0A286YFM7, B7Z2B2, E7ERQ4, Q8NHS3]	256471
			3.18362	0.00188289			1.Extracellular	1.Extracellular, 2.Plasma Membrane, 3.Intra Cellular	0.314108	2	4	ENSG00000157625	GENE-nonsense_mediated_decay,processed_transcript,protein_coding	257397	TAB3	TAB3			false	257397	313.5	0	2	ASSOCIATED_NEW_GENE	0	0.993403	false	0	257397	154748		0.528765	[A0A0A0MQY2, F6SS63, Q8N5C8]	257397
			3.54676	0	Transcription Factor Complex		4.Nuclear Membrane	4.Nuclear Membrane	0.281948	2	4	ENSG00000141448	GENE-protein_coding	2627	GATA6	GATA6			false	2627	327	0	2	ASSOCIATED_NEW_GENE	1	0.992306	false	0	2627	0		0	[Q05CA6, Q92908]	2627
			3.15495	0.00330679	Transcription Factor Complex		0.Annotation definition not found in 'Homo Sapiens.properties' file	0.Annotation definition not found in 'Homo Sapiens.properties' file	0.316962	2	4	ENSG00000148200	GENE-protein_coding	2649	NR6A1	NR6A1			false	2649	317	0	2	ASSOCIATED_NEW_GENE	0	0.99349	false	0	2649	174364		0.51634	[C9JDI9, F1D8S0, F1DAM1, Q15406]	2649
			3.15358	0.00298241			3.Intra Cellular	3.Intra Cellular	0.3171	2	4	ENSG00000092847	GENE-nonsense_mediated_decay,protein_coding	26523	2001-08-01	2001-08-01			false	26523	319	0	2	ASSOCIATED_NEW_GENE	0	0.993494	false	0	26523	173450		0.51876	[A0A0U1RQZ8, A0A6I8PTZ8, B2RAD8, B3KME0, Q5TA58, Q9UL18]	26523
			3.46621	0.00383151			1.Extracellular	1.Extracellular, 3.Intra Cellular	0.288499	2	4	ENSG00000198380	GENE-nonsense_mediated_decay,protein_coding	2673	GFPT1	GFPT1			false	2673	194.5	0	2	ASSOCIATED_NEW_GENE	0	0.992549	false	0	2673	128360		0.503906	[A0A6I8PRN4, A0A6I8PRT6, A0A6I8PTT9, Q06210]	2673
			3.17816	0.00567528			3.Intra Cellular	3.Intra Cellular	0.314648	2	4	ENSG00000090905	GENE-nonsense_mediated_decay,processed_transcript,protein_coding,retained_intron	27327	TNRC6A	TNRC6A			false	27327	303.5	0	2	ASSOCIATED_NEW_GENE	0	0.993419	false	0	27327	170054		0.508403	[H3BRT3, H3BTQ1, H7C269, I3L218, I3L3S5, Q8NDV7]	27327
			3.18362	0.00188289			1.Extracellular	1.Extracellular, 3.Intra Cellular	0.314108	2	4	ENSG00000135677	GENE-protein_coding,retained_intron	2799	GNS	GNS			false	2799	313.5	0	2	ASSOCIATED_NEW_GENE	0	0.993403	false	0	2799	154748		0.528765	[A0A024RBC5, A0A0S2Z3S2, F5H4C6, F6S8M0, H0YFA9, H7C3P4, P15586, Q7Z3X3]	2799
			3.18362	0.00188289			3.Intra Cellular	3.Intra Cellular	0.314108	2	4	ENSG00000196072	GENE-processed_transcript,protein_coding	282991	BLOC1S2	BLOC1S2			false	282991	313.5	0	2	ASSOCIATED_NEW_GENE	0	0.993403	false	0	282991	154748		0.528765	[A0A087X1N6, F1T0F0, J3QRU7, L8E7A4, Q6QNY1]	282991
			3.43891	0.00652964			3.Intra Cellular	3.Intra Cellular	0.29079	2	4	ENSG00000120071	GENE-processed_transcript,protein_coding,retained_intron	284058	KANSL1	KANSL1			false	284058	204.5	0	2	ASSOCIATED_NEW_GENE	0	0.992632	false	0	284058	186696		0.503713	[A0A024R9Y2, A0A0G2JNB1, A0A0G2JNT7, A0A0G2JQF4, A0A0G2JQF5, A0A0G2JQP8, A0A0G2JRW7, A0A0J9YVS1, A0A1W2PPV8, A0A1W2PQT4, A0A1W2PRA9, A0A1W2PRB5, A0A1W2PRR3, A0A1W2PS83, A0A3B3IT55, I3L233, I3L243, Q7Z3B3]	284058
			3.15495	0.00330679			0.Annotation definition not found in 'Homo Sapiens.properties' file	0.Annotation definition not found in 'Homo Sapiens.properties' file	0.316962	2	4	ENSG00000197054	GENE-protein_coding	284390	ZNF763	ZNF763			false	284390	317	0	2	ASSOCIATED_NEW_GENE	0	0.99349	false	0	284390	174364		0.51634	[K7EJ80, K7EJF3, K7ESF6, Q0D2J5]	284390
			3.5413	0			1.Extracellular	1.Extracellular, 2.Plasma Membrane, 3.Intra Cellular	0.282382	2	4	ENSG00000198719	GENE-protein_coding	28514	DLL1	DLL1			false	28514	331	0	2	ASSOCIATED_NEW_GENE	1	0.992322	false	0	28514	0		0	[A0A0D9SF76, A0A384P5C6, O00548]	28514
			3.50853	0.00337264			3.Intra Cellular	3.Intra Cellular, 5.Nucleus	0.285019	2	4	ENSG00000146223	GENE-nonsense_mediated_decay,processed_transcript,protein_coding,retained_intron	285855	RPL7L1	RPL7L1			false	285855	179	0	2	ASSOCIATED_NEW_GENE	0	0.992421	false	0	285855	106646		0.504249	[A0A024RD36, A0A1W2PQ76, Q6DKI1, R4GMU7]	285855
			3.46621	0.00383151			3.Intra Cellular	3.Intra Cellular	0.288499	2	4	ENSG00000099875	GENE-nonsense_mediated_decay,protein_coding,retained_intron	2872	MKNK2	MKNK2			false	2872	194.5	0	2	ASSOCIATED_NEW_GENE	0	0.992549	false	0	2872	128360		0.503906	[B3KS07, K7EIN7, K7EJ98, K7EK27, K7ELG3, K7ELN0, K7EMP5, Q9HBH9, Q9NV89]	2872
			3.40205	0.00402853			3.Intra Cellular	3.Intra Cellular, 4.Nuclear Membrane	0.293941	2	4	ENSG00000079387	GENE-nonsense_mediated_decay,processed_transcript,protein_coding,retained_intron	29843	SENP1	SENP1			false	29843	219.5	0	2	ASSOCIATED_NEW_GENE	0	0.992743	false	0	29843	170856		0.506961	[F8VRZ8, F8W0I8, Q6N001, Q7Z3G1, Q9P0U3]	29843
			3.48123	0.00258862			0.Annotation definition not found in 'Homo Sapiens.properties' file	0.Annotation definition not found in 'Homo Sapiens.properties' file	0.287255	2	4	ENSG00000187837	GENE-protein_coding	3006	H1-2	H1-2			false	3006	189.5	0	2	ASSOCIATED_NEW_GENE	0	0.992504	false	0	3006	58122		0.505362	[P16403]	3006
			3.5058	0.00148416			0.Annotation definition not found in 'Homo Sapiens.properties' file	0.Annotation definition not found in 'Homo Sapiens.properties' file	0.285241	2	4	ENSG00000168298	GENE-protein_coding	3008	H1-4	H1-4			false	3008	181	0	2	ASSOCIATED_NEW_GENE	0	0.99243	false	0	3008	76684		0.507042	[A3R0T8, P10412]	3008
			3.13311	0.00251942			1.Extracellular	1.Extracellular	0.319172	2	4	ENSG00000132475	GENE-processed_transcript,protein_coding,retained_intron	3021	H3-3B	H3-3B			false	3021	329	0	2	ASSOCIATED_NEW_GENE	0	0.993556	false	0	3021	179336		0.522293	[B2R4P9, K7EK07, K7EMV3, K7EP01, K7ES00, P84243]	3021
			3.51945	0.00504763			3.Intra Cellular	3.Intra Cellular	0.284135	2	4	ENSG00000156515	GENE-nonsense_mediated_decay,processed_transcript,protein_coding,retained_intron	3098	HK1	HK1			false	3098	174	0	2	ASSOCIATED_NEW_GENE	0	0.992388	false	0	3098	50506		0.501449	[A0A024QZK7, A0A2R8Y626, A0A2R8Y7T9, A0A2R8YEE7, A8K7J7, B1AR62, B3KXY9, P19367, P78542, Q59FD4]	3098
			3.13311	0.00251942			1.Extracellular	1.Extracellular, 2.Plasma Membrane, 3.Intra Cellular	0.319172	2	4	ENSG00000204388	GENE-protein_coding	3304	HSPA1B	HSPA1B			false	3304	329	0	2	ASSOCIATED_NEW_GENE	0	0.993556	false	0	3304	179336		0.522293	[A0A0G2JIW1, A8K5I0, P0DMV8, P0DMV9]	3304
			3.53447	0.0024426			3.Intra Cellular	3.Intra Cellular	0.282928	2	4	ENSG00000177076	GENE-protein_coding	340485	ACER2	ACER2			false	340485	169	0	2	ASSOCIATED_NEW_GENE	0	0.992343	false	0	340485	86564		0.502994	[B3KVV5, Q5QJU3]	340485
			3.15495	0.00330679			3.Intra Cellular	3.Intra Cellular	0.316962	2	4	ENSG00000177034	GENE-protein_coding	345778	MTX3	MTX3			false	345778	317	0	2	ASSOCIATED_NEW_GENE	0	0.99349	false	0	345778	174364		0.51634	[Q5HYI7]	345778
			3.15768	0.00340227			1.Extracellular	1.Extracellular, 3.Intra Cellular	0.316688	2	4	ENSG00000178035	GENE-nonsense_mediated_decay,protein_coding,retained_intron	3615	IMPDH2	IMPDH2			false	3615	315.5	0	2	ASSOCIATED_NEW_GENE	0	0.993481	false	0	3615	173290		0.515574	[A0A384N6C2, A0A7I2V2T3, A0A7I2V337, A0A7I2V5N6, A0A7I2YQK5, E7ETK5, H0Y4R1, P12268, Q6QE17, Q6RUP8, Q6RUP9]	3615
			4.06689	0			2.Plasma Membrane	2.Plasma Membrane, 3.Intra Cellular	0.245888	2	6	ENSG00000055118	GENE-protein_coding,retained_intron	3757	KCNH2	KCNH2			false	3757	108	0	2	ASSOCIATED_NEW_GENE	1	0.990734	false	0	3757	0		0	[A0A090N7W1, A0A090N7X5, A0A090N8Q0, A0PJW5, A8WBZ2, C7DYB4, J9SM79, Q12809, Q15BH2, Q45QN5, Q6U279, Q6U283, Q6U287, Q75MK8, Q75MK9]	3757
			4.06689	0			2.Plasma Membrane	2.Plasma Membrane, 3.Intra Cellular	0.245888	2	6	ENSG00000053918	GENE-processed_transcript,protein_coding	3784	KCNQ1	KCNQ1			false	3784	108	0	2	ASSOCIATED_NEW_GENE	1	0.990734	false	0	3784	0		0	[A0A0J9YXF5, A0A2R8YDV1, A0A2R8YEQ9, A0FIK7, A0FIK8, E9PPZ0, F8W824, P51787, Q96AI9]	3784
			3.13311	0.00251942			1.Extracellular	1.Extracellular, 2.Plasma Membrane, 3.Intra Cellular	0.319172	2	4	ENSG00000165527	GENE-protein_coding	382	ARF6	ARF6			false	382	329	0	2	ASSOCIATED_NEW_GENE	0	0.993556	false	0	382	179336		0.522293	[P62330, Q6FH17]	382
			3.13311	0.00251942			3.Intra Cellular	3.Intra Cellular	0.319172	2	4	ENSG00000114030	GENE-nonsense_mediated_decay,processed_transcript,protein_coding	3836	KPNA1	KPNA1			false	3836	329	0	2	ASSOCIATED_NEW_GENE	0	0.993556	false	0	3836	179336		0.522293	[B3KXZ2, C9J352, C9J4U1, C9JWD9, C9JYI4, F2Z3G4, L8EC94, P52294, Q5BKZ2]	3836
			3.15495	0.00330679			1.Extracellular	1.Extracellular, 3.Intra Cellular	0.316962	2	4	ENSG00000188811	GENE-protein_coding,retained_intron	387921	NHLRC3	NHLRC3			false	387921	317	0	2	ASSOCIATED_NEW_GENE	0	0.99349	false	0	387921	174364		0.51634	[C9J973, Q5JS37, Q68DP7]	387921
			3.44437	0.00369203			3.Intra Cellular	3.Intra Cellular	0.290329	2	4	ENSG00000002834	GENE-nonsense_mediated_decay,protein_coding,retained_intron	3927	LASP1	LASP1			false	3927	204	0	2	ASSOCIATED_NEW_GENE	0	0.992615	false	0	3927	165512		0.5075	[A0A024R1S8, B4DIC4, C9J9W2, F6S2S5, J3KSN1, K7ESD6, Q14847]	3927
			3.15768	0.00340227			2.Plasma Membrane	2.Plasma Membrane, 3.Intra Cellular	0.316688	2	4	ENSG00000131711	GENE-nonsense_mediated_decay,processed_transcript,protein_coding	4131	MAP1B	MAP1B			false	4131	315.5	0	2	ASSOCIATED_NEW_GENE	0	0.993481	false	0	4131	173290		0.515574	[A0A024RAM4, A2BDK6, A5D6X1, A5D8X6, D6RA32, D6RA40, D6RCL2, D6RGJ3, P46821, Q05BW8, Q32NB7, Q4VBY4, Q6PJD3, Q86X89]	4131
			3.15768	0.00340227			3.Intra Cellular	3.Intra Cellular	0.316688	2	4	ENSG00000047849	GENE-protein_coding,retained_intron	4134	MAP4	MAP4			false	4134	315.5	0	2	ASSOCIATED_NEW_GENE	0	0.993481	false	0	4134	173290		0.515574	[A0A024R2S1, A0A024R2V0, A0A024R2V2, A0A0J9YVV8, A0A0J9YW37, A0A804HKE7, B5MEG9, E7EVA0, F8W9U4, H0Y2V1, H7C456, H7C4C5, P27816, Q05D06, Q6NX68, Q86Y04]	4134
			3.44437	0.00369203			2.Plasma Membrane	2.Plasma Membrane, 3.Intra Cellular	0.290329	2	4	ENSG00000185231	GENE-protein_coding	4158	MC2R	MC2R			false	4158	204	0	2	ASSOCIATED_NEW_GENE	0	0.992615	false	0	4158	165512		0.5075	[Q01718, R4GMM0]	4158
			3.48123	0.00258862			3.Intra Cellular	3.Intra Cellular, 5.Nucleus	0.287255	2	4	ENSG00000112118	GENE-processed_transcript,protein_coding	4172	MCM3	MCM3			false	4172	189.5	0	2	ASSOCIATED_NEW_GENE	0	0.992504	false	0	4172	58122		0.505362	[A0A0S2Z492, A0A0S2Z4T1, A0A499FHX9, B4DUQ9, J3KQ69, P25205, Q7Z6P5]	4172
			3.15358	0.00298241	Transcription Factor Complex		0.Annotation definition not found in 'Homo Sapiens.properties' file	0.Annotation definition not found in 'Homo Sapiens.properties' file	0.3171	2	4	ENSG00000198625	GENE-processed_transcript,protein_coding	4194	MDM4	MDM4			false	4194	319	0	2	ASSOCIATED_NEW_GENE	0	0.993494	false	0	4194	173450		0.51876	[A0A087WTR9, A0A087WUE3, A0A087WZ58, M9UVU3, O15151, Q59FS6, Q5T0Y2, Q5T0Y3, Q5T0Y4, Q68DC0, Q6MZR7]	4194
			3.18362	0.00188289			1.Extracellular	1.Extracellular, 3.Intra Cellular	0.314108	2	4	ENSG00000152127	GENE-processed_transcript,protein_coding	4249	MGAT5	MGAT5			false	4249	313.5	0	2	ASSOCIATED_NEW_GENE	0	0.993403	false	0	4249	154748		0.528765	[Q09328, Q53SM9, Q53SV8, Q53SZ9]	4249
			3.40478	0.00519715			1.Extracellular	1.Extracellular, 2.Plasma Membrane, 3.Intra Cellular	0.293705	2	4	ENSG00000157227	GENE-non_stop_decay,nonsense_mediated_decay,processed_transcript,protein_coding,retained_intron	4323	MMP14	MMP14			false	4323	217.5	0	2	ASSOCIATED_NEW_GENE	0	0.992735	false	0	4323	188542		0.504662	[A0A7P0TAG0, A0A7P0TAV6, A0A7P0TBK8, F8VP90, K4RH61, P50281]	4323
			3.18362	0.00188289			3.Intra Cellular	3.Intra Cellular	0.314108	2	4	ENSG00000015133	GENE-processed_transcript,protein_coding,retained_intron	440193	CCDC88C	CCDC88C			false	440193	313.5	0	2	ASSOCIATED_NEW_GENE	0	0.993403	false	0	440193	154748		0.528765	[A0A0A0MR69, B4DZB8, G3V3S0, H0YJX5, Q0P665, Q9P219]	440193
			3.15768	0.00340227			1.Extracellular	1.Extracellular, 3.Intra Cellular	0.316688	2	4	ENSG00000099810	GENE-nonsense_mediated_decay,processed_transcript,protein_coding,retained_intron	4507	MTAP	MTAP			false	4507	315.5	0	2	ASSOCIATED_NEW_GENE	0	0.993481	false	0	4507	173290		0.515574	[A0A2R8Y4K0, A0A384ME80, B4DUC8, F8WES2, J3KRN1, J3QSB7, L8E7D7, Q05DJ2, Q13126, Q6FHP1, Q6FHT1, Q9NRK7]	4507
			3.5413	0	Transcription Factor Complex		3.Intra Cellular	3.Intra Cellular	0.282382	2	4	ENSG00000118513	GENE-nonsense_mediated_decay,processed_transcript,protein_coding	4602	MYB	MYB			false	4602	331	0	2	ASSOCIATED_NEW_GENE	1	0.992322	false	0	4602	0		0	[A0A087WTI6, A0A0C4DG19, E9PIW4, E9PJ96, E9PJF1, E9PJT2, E9PKZ3, E9PLN0, E9PMQ0, E9PMZ0, E9PN43, E9PN92, E9PNH6, E9PP87, E9PPL8, E9PPR4, E9PQQ2, F8W8G5, H0YCN6, P10242, Q708E1, Q708E3, Q708E5, Q708E6, Q708E8, Q708E9]	4602
			3.15358	0.00298241	Transcription Factor Complex		3.Intra Cellular	3.Intra Cellular, 5.Nucleus	0.3171	2	4	ENSG00000136997	GENE-processed_transcript,protein_coding	4609	MYC	MYC			false	4609	319	0	2	ASSOCIATED_NEW_GENE	0	0.993494	false	0	4609	173450		0.51876	[A0A024R9L7, A0A087WUS5, A0A0B4J1R1, A0A224B085, A0A494C1T8, A0N2G3, B0B0N9, B3CJ63, B3CJ64, B3CJ65, B3CJ66, B3CJ69, B3CJ71, B3CJ72, B3CJ73, B3CJ74, B3CJ75, B3CJ76, B3CJ77, B3CJ78, B3CJ81, B3CJ82, B3CJ86, B3CJ87, B3CJ88, B3CJ89, B3CJ90, B3CJ91, B3CJ92, B3CJ93, B3CJ94, B3CJA1, B3CJA3, B3CJA4, B3CJA7, B3CJA8, B3CJA9, B3CJB0, B3CJB1, B3CJB2, B3CJB3, B3CJB8, B3CJB9, B3CJC0, B3CJC6, B3CJC7, B3CJC8, B3…	4609
			3.5413	0			5.Nucleus	5.Nucleus	0.282382	2	4	ENSG00000134323	GENE-protein_coding	4613	MYCN	MYCN			false	4613	331	0	2	ASSOCIATED_NEW_GENE	1	0.992322	false	0	4613	0		0	[A0A1W2PPD9, A0A5P8TXN7, L8E744, P04198, Q9H224]	4613
			3.81297	0.0020211			3.Intra Cellular	3.Intra Cellular	0.262263	2	6	ENSG00000097033	GENE-protein_coding,retained_intron	51100	SH3GLB1	SH3GLB1			false	51100	77.5	0	2	ASSOCIATED_NEW_GENE	0	0.991502	false	0	51100	32408		0.503289	[A0A087WW40, A0A140VJU5, Q9Y371]	51100
			3.13311	0.00251942			2.Plasma Membrane	2.Plasma Membrane, 3.Intra Cellular	0.319172	2	4	ENSG00000134853	GENE-nonsense_mediated_decay,protein_coding,retained_intron	5156	PDGFRA	PDGFRA			false	5156	329	0	2	ASSOCIATED_NEW_GENE	0	0.993556	false	0	5156	179336		0.522293	[A0A387LBM6, D6RDX0, D6RG11, D6RIG5, D6RJH0, P16234]	5156
			3.54676	0			3.Intra Cellular	3.Intra Cellular	0.281948	2	4	ENSG00000087095	GENE-nonsense_mediated_decay,processed_transcript,protein_coding,retained_intron	51701	NLK	NLK			false	51701	327	0	2	ASSOCIATED_NEW_GENE	1	0.992306	false	0	51701	0		0	[A0A024QZ12, H0YD75, J3QSE9, Q9UBE8]	51701
			4.06689	0			1.Extracellular	1.Extracellular, 3.Intra Cellular	0.245888	2	6	ENSG00000067225	GENE-nonsense_mediated_decay,protein_coding,retained_intron	5315	PKM	PKM			false	5315	108	0	2	ASSOCIATED_NEW_GENE	1	0.990734	false	0	5315	0		0	[A0A024R5Z9, A0A804F6T5, A0A804F729, B4DNK4, H3BN34, H3BQ34, H3BQZ3, H3BR70, H3BT25, H3BTJ2, H3BTN5, H3BU13, H3BUW1, P14618, V9HWB8]	5315
			3.58362	0			1.Extracellular	1.Extracellular, 2.Plasma Membrane, 3.Intra Cellular	0.279048	2	4	ENSG00000122861	GENE-processed_transcript,protein_coding	5328	PLAU	PLAU			false	5328	300	0	2	ASSOCIATED_NEW_GENE	1	0.992195	false	0	5328	0		0	[A0A024QZM9, B4DNJ4, E7ET40, P00749, Q59GZ8, Q9UEJ5, S4R3G7]	5328
			3.50034	0.00295828			1.Extracellular	1.Extracellular, 2.Plasma Membrane, 3.Intra Cellular	0.285686	2	4	ENSG00000197943	GENE-nonsense_mediated_decay,processed_transcript,protein_coding,retained_intron	5336	PLCG2	PLCG2			false	5336	182.5	0	2	ASSOCIATED_NEW_GENE	0	0.992446	false	0	5336	107572		0.505571	[A0A0A0MRF9, H3BMT7, H3BPZ3, H3BQV5, P16885]	5336
			3.15495	0.00330679			3.Intra Cellular	3.Intra Cellular	0.316962	2	4	ENSG00000141682	GENE-protein_coding,retained_intron	5366	PMAIP1	PMAIP1			false	5366	317	0	2	ASSOCIATED_NEW_GENE	0	0.99349	false	0	5366	174364		0.51634	[A0A024R2C2, A0A0S2Z490, A0A0S2Z4V2, Q13794]	5366
			3.43208	0.0047573			3.Intra Cellular	3.Intra Cellular	0.291368	2	4	ENSG00000145569	GENE-processed_transcript,protein_coding	54491	OTULINL	OTULINL			false	54491	208	0	2	ASSOCIATED_NEW_GENE	0	0.992652	false	0	54491	174496		0.506112	[Q9NUU6]	54491
			3.51945	0.00504763			1.Extracellular	1.Extracellular, 2.Plasma Membrane, 3.Intra Cellular, 5.Nucleus	0.284135	2	4	ENSG00000213639	GENE-nonsense_mediated_decay,protein_coding,retained_intron	5500	PPP1CB	PPP1CB			false	5500	174	0	2	ASSOCIATED_NEW_GENE	0	0.992388	false	0	5500	50506		0.501449	[C9J9S3, C9JP48, E7ETD8, F8WE71, H0Y3Y6, P62140, V9HW04]	5500
			3.15358	0.00298241			3.Intra Cellular	3.Intra Cellular	0.3171	2	4	ENSG00000182263	GENE-processed_transcript,protein_coding	55137	FIGN	FIGN			false	55137	319	0	2	ASSOCIATED_NEW_GENE	0	0.993494	false	0	55137	173450		0.51876	[B8ZZS6, Q5HY92]	55137
			3.47986	0.00578397			0.Annotation definition not found in 'Homo Sapiens.properties' file	0.Annotation definition not found in 'Homo Sapiens.properties' file	0.287368	2	4	ENSG00000204569	GENE-processed_transcript,protein_coding,retained_intron	5514	PPP1R10	PPP1R10			false	5514	188.5	0	2	ASSOCIATED_NEW_GENE	0	0.992508	false	0	5514	67384		0.501337	[Q2L6I0, Q58F28, Q96QC0]	5514
			3.17816	0.00567528			3.Intra Cellular	3.Intra Cellular	0.314648	2	4	ENSG00000253719	GENE-protein_coding	552889	ATXN7L3B	ATXN7L3B			false	552889	303.5	0	2	ASSOCIATED_NEW_GENE	0	0.993419	false	0	552889	170054		0.508403	[Q96GX2]	552889
			3.15768	0.00340227			1.Extracellular	1.Extracellular	0.316688	2	4	ENSG00000270276	GENE-nonsense_mediated_decay,protein_coding	554313	H4C15	H4C15			false	554313	315.5	0	2	ASSOCIATED_NEW_GENE	0	0.993481	false	0	554313	173290		0.515574	[B2R4R0, P62805]	554313
			3.18362	0.00188289			5.Nucleus	5.Nucleus	0.314108	2	4	ENSG00000124228	GENE-nonsense_mediated_decay,protein_coding,retained_intron	55661	DDX27	DDX27			false	55661	313.5	0	2	ASSOCIATED_NEW_GENE	0	0.993403	false	0	55661	154748		0.528765	[A0A087WYH5, A0A087X059, B3GQE6, B7Z6D5, Q3MI07, Q96GQ7]	55661
			3.50853	0.00337264			3.Intra Cellular	3.Intra Cellular, 5.Nucleus	0.285019	2	4	ENSG00000167721	GENE-nonsense_mediated_decay,protein_coding,retained_intron	55720	TSR1	TSR1			false	55720	179	0	2	ASSOCIATED_NEW_GENE	0	0.992421	false	0	55720	106646		0.504249	[I3L1Q5, I3L4E8, I3L4T0, L8EAY9, Q2NL82]	55720
			3.48123	0.00968624			2.Plasma Membrane	2.Plasma Membrane, 3.Intra Cellular	0.287255	2	4	ENSG00000112697	GENE-nonsense_mediated_decay,protein_coding	55754	TMEM30A	TMEM30A			false	55754	187.5	0	2	ASSOCIATED_NEW_GENE	0	0.992504	false	0	55754	53606		0.5	[A0A669KB92, A0A669KBA0, A0A669KBE6, A0A669KBF5, E5RG19, Q9NV96]	55754
			3.43891	0.00652964			0.Annotation definition not found in 'Homo Sapiens.properties' file	0.Annotation definition not found in 'Homo Sapiens.properties' file	0.29079	2	4	ENSG00000167562	GENE-processed_transcript,protein_coding	55762	ZNF701	ZNF701			false	55762	204.5	0	2	ASSOCIATED_NEW_GENE	0	0.992632	false	0	55762	186696		0.503713	[M0R085, M0R327, Q6NWZ7, Q7Z2U6, Q7Z749, Q9NV72]	55762
			3.47031	0.00437311			1.Extracellular	1.Extracellular, 2.Plasma Membrane, 3.Intra Cellular	0.288159	2	4	ENSG00000100030	GENE-processed_transcript,protein_coding	5594	MAPK1	MAPK1			false	5594	192.5	0	2	ASSOCIATED_NEW_GENE	0	0.992537	false	0	5594	94578		0.502625	[P28482, Q1HBJ4, Q499G7]	5594
			3.18362	0.00188289			0.Annotation definition not found in 'Homo Sapiens.properties' file	0.Annotation definition not found in 'Homo Sapiens.properties' file	0.314108	2	4	ENSG00000256771	GENE-protein_coding,retained_intron	56242	ZNF253	ZNF253			false	56242	313.5	0	2	ASSOCIATED_NEW_GENE	0	0.993403	false	0	56242	154748		0.528765	[A0A1W2PRC0, K7EP55, O75346]	56242
			3.15358	0.00298241			2.Plasma Membrane	2.Plasma Membrane, 3.Intra Cellular	0.3171	2	4	ENSG00000184047	GENE-nonsense_mediated_decay,protein_coding,retained_intron	56616	DIABLO	DIABLO			false	56616	319	0	2	ASSOCIATED_NEW_GENE	0	0.993494	false	0	56616	173450		0.51876	[A0A024RBT2, A0A0S2Z5P6, A0A0S2Z5U7, A0A2R8Y5H2, A0A2U3TZH2, F5GX50, F5GXT8, F5GYH3, H7BZK7, H7BZQ7, K7X1S0, Q502X2, Q9NR28]	56616
			3.15358	0.00298241			3.Intra Cellular	3.Intra Cellular	0.3171	2	4	ENSG00000079332	GENE-processed_transcript,protein_coding	56681	SAR1A	SAR1A			false	56681	319	0	2	ASSOCIATED_NEW_GENE	0	0.993494	false	0	56681	173450		0.51876	[H0Y5E8, Q5SQT8, Q5SQT9, Q9NR31, X1WI22]	56681
			3.52218	0.0050673			3.Intra Cellular	3.Intra Cellular	0.283915	2	4	ENSG00000124201	GENE-processed_transcript,protein_coding	57169	ZNFX1	ZNFX1			false	57169	173	0	2	ASSOCIATED_NEW_GENE	0	0.99238	false	0	57169	49338		0.501458	[H0UI63, Q2TAK0, Q5JXR5, Q5JXR6, Q5JXR7, Q6P6B6, Q6PJM4, Q9P2E3]	57169
			3.15495	0.00330679			1.Extracellular	1.Extracellular, 2.Plasma Membrane, 3.Intra Cellular, 5.Nucleus	0.316962	2	4	ENSG00000129422	GENE-nonsense_mediated_decay,processed_transcript,protein_coding,retained_intron	57509	MTUS1	MTUS1			false	57509	317	0	2	ASSOCIATED_NEW_GENE	0	0.99349	false	0	57509	174364		0.51634	[A0A0U1RQI2, H0YC63, Q9ULD2]	57509
			3.15768	0.00340227			3.Intra Cellular	3.Intra Cellular	0.316688	2	4	ENSG00000108256	GENE-protein_coding	57532	NUFIP2	NUFIP2			false	57532	315.5	0	2	ASSOCIATED_NEW_GENE	0	0.993481	false	0	57532	173290		0.515574	[Q7Z417]	57532
			3.80887	0.00393086			3.Intra Cellular	3.Intra Cellular, 5.Nucleus	0.262545	2	6	ENSG00000173821	GENE-processed_transcript,protein_coding,retained_intron	57674	RNF213	RNF213			false	57674	78.5	0	2	ASSOCIATED_NEW_GENE	0	0.991514	false	0	57674	35958		0.5	[A0A0A0MTC1, A0A0A0MTR7, I3L3H9, Q63HN8]	57674
			3.15768	0.00340227			3.Intra Cellular	3.Intra Cellular	0.316688	2	4	ENSG00000025039	GENE-processed_transcript,protein_coding	58528	RRAGD	RRAGD			false	58528	315.5	0	2	ASSOCIATED_NEW_GENE	0	0.993481	false	0	58528	173290		0.515574	[Q9NQL2]	58528
			3.15358	0.00298241			1.Extracellular	1.Extracellular, 3.Intra Cellular	0.3171	2	4	ENSG00000151552	GENE-nonsense_mediated_decay,protein_coding,retained_intron	5860	QDPR	QDPR			false	5860	319	0	2	ASSOCIATED_NEW_GENE	0	0.993494	false	0	5860	173450		0.51876	[A0A140VKA9, B7Z415, D6RGG7, D6RHJ7, H0Y8F7, P09417]	5860
			3.44437	0.00369203			3.Intra Cellular	3.Intra Cellular, 4.Nuclear Membrane	0.290329	2	4	ENSG00000171552	GENE-nonsense_mediated_decay,processed_transcript,protein_coding	598	BCL2L1	BCL2L1			false	598	204	0	2	ASSOCIATED_NEW_GENE	0	0.992615	false	0	598	165512		0.5075	[A0A0S2Z3C5, A0A0S2Z3D2, A0A7I2V597, Q07817, Q5QP56, Q5QP59, Q5TE63, Q5TE64, Q9H1R6]	598
			3.5058	0.00148416			1.Extracellular	1.Extracellular, 3.Intra Cellular	0.285241	2	4	ENSG00000149313	GENE-nonsense_mediated_decay,protein_coding,retained_intron	60496	AASDHPPT	AASDHPPT			false	60496	181	0	2	ASSOCIATED_NEW_GENE	0	0.99243	false	0	60496	76684		0.507042	[E9PLW6, E9PNF3, Q9NRN7]	60496
			3.48123	0.00258862			1.Extracellular	1.Extracellular, 3.Intra Cellular, 5.Nucleus	0.287255	2	4	ENSG00000140988	GENE-nonsense_mediated_decay,protein_coding,retained_intron	6187	RPS2	RPS2			false	6187	189.5	0	2	ASSOCIATED_NEW_GENE	0	0.992504	false	0	6187	58122		0.505362	[D3DU83, E9PM36, E9PMM9, E9PPT0, E9PQD7, H0YE27, H0YEN5, H3BNG3, I3L404, P15880, Q3KQT6, Q6IPX5, Q8N5L9, Q9BSW5]	6187
			3.13311	0.00251942			1.Extracellular	1.Extracellular	0.319172	2	4	ENSG00000102962	GENE-protein_coding	6367	CCL22	CCL22			false	6367	329	0	2	ASSOCIATED_NEW_GENE	0	0.993556	false	0	6367	179336		0.522293	[O00626]	6367
			3.43345	0.00456683			3.Intra Cellular	3.Intra Cellular	0.291252	2	4	ENSG00000116095	GENE-nonsense_mediated_decay,processed_transcript,protein_coding	65977	PLEKHA3	PLEKHA3			false	65977	207.5	0	2	ASSOCIATED_NEW_GENE	0	0.992648	false	0	65977	212888		0.506127	[F8WCR7, H7C0Q0, Q9HB20]	65977
			3.15495	0.00330679			3.Intra Cellular	3.Intra Cellular	0.316962	2	4	ENSG00000204138	GENE-nonsense_mediated_decay,processed_transcript,protein_coding,retained_intron	65979	PHACTR4	PHACTR4			false	65979	317	0	2	ASSOCIATED_NEW_GENE	0	0.99349	false	0	65979	174364		0.51634	[A0A0J9YVR0, A0A0J9YWV8, A0A0J9YY52, Q8IZ21]	65979
			3.17816	0.00567528			1.Extracellular	1.Extracellular, 3.Intra Cellular	0.314648	2	4	ENSG00000112096	GENE-nonsense_mediated_decay,processed_transcript,protein_coding,retained_intron	6648	SOD2	SOD2			false	6648	303.5	0	2	ASSOCIATED_NEW_GENE	0	0.993419	false	0	6648	170054		0.508403	[A0A384NL29, F5GXZ9, F5GYZ5, F5H3C5, F5H4R2, G5E9P6, G8JLJ2, P04179, Q4ZJI1, Q6LE88, Q71UR9, Q7Z7M4, Q7Z7M5, Q7Z7M6, Q7Z7M7, Q96AM7, Q9UG59]	6648
			3.87167	0.00353254	Transcription Factor Complex		3.Intra Cellular	3.Intra Cellular	0.258286	2	6	ENSG00000185591	GENE-protein_coding	6667	SP1	SP1			false	6667	78	0	2	ASSOCIATED_NEW_GENE	0	0.991324	false	0	6667	29578		0.5	[B2R4Y6, H3BUU5, H3BVI2, L8E7F4, P08047, Q15403]	6667
			3.15768	0.00340227			1.Extracellular	1.Extracellular, 2.Plasma Membrane, 3.Intra Cellular	0.316688	2	4	ENSG00000197122	GENE-processed_transcript,protein_coding,retained_intron	6714	SRC	SRC			false	6714	315.5	0	2	ASSOCIATED_NEW_GENE	0	0.993481	false	0	6714	173290		0.515574	[P12931, Q71UK5]	6714
			3.15358	0.00298241			2.Plasma Membrane	2.Plasma Membrane, 3.Intra Cellular, 4.Nuclear Membrane	0.3171	2	4	ENSG00000148248	GENE-processed_transcript,protein_coding	6836	SURF4	SURF4			false	6836	319	0	2	ASSOCIATED_NEW_GENE	0	0.993494	false	0	6836	173450		0.51876	[B7Z1G8, B7Z7A8, O15260, Q5T8U5, Q5T8U7]	6836
			3.18362	0.00188289			2.Plasma Membrane	2.Plasma Membrane, 3.Intra Cellular	0.314108	2	4	ENSG00000151694	GENE-nonsense_mediated_decay,processed_transcript,protein_coding,retained_intron	6868	ADAM17	ADAM17			false	6868	313.5	0	2	ASSOCIATED_NEW_GENE	0	0.993403	false	0	6868	154748		0.528765	[A0A3B3ISQ1, A0A3B3IST4, A0A3B3ITB5, A0A3B3ITW9, A6H8L4, B2RNB2, P78536, Q53RF5, Q53RS1, Q53S40, Q6P5T8]	6868
			3.15495	0.00330679			2.Plasma Membrane	2.Plasma Membrane, 3.Intra Cellular	0.316962	2	4	ENSG00000106799	GENE-nonsense_mediated_decay,protein_coding	7046	TGFBR1	TGFBR1			false	7046	317	0	2	ASSOCIATED_NEW_GENE	0	0.99349	false	0	7046	174364		0.51634	[A6MIV6, A6MIV7, B4DXN7, B4DY26, F8VRH6, F8VVC4, F8VXZ5, F8W0K6, F8W1R9, H0YHS4, P36897, Q5T7S2]	7046
			3.15495	0.00330679			1.Extracellular	1.Extracellular, 2.Plasma Membrane, 3.Intra Cellular	0.316962	2	4	ENSG00000069702	GENE-nonsense_mediated_decay,processed_transcript,protein_coding,retained_intron	7049	TGFBR3	TGFBR3			false	7049	317	0	2	ASSOCIATED_NEW_GENE	0	0.99349	false	0	7049	174364		0.51634	[A0A0A8KWK3, E9PAW7, E9PKY4, E9PMG7, Q03167]	7049
			3.48123	0.00258862			1.Extracellular	1.Extracellular, 2.Plasma Membrane, 3.Intra Cellular	0.287255	2	4	ENSG00000184009	GENE-nonsense_mediated_decay,protein_coding,retained_intron	71	ACTG1	ACTG1			false	71	189.5	0	2	ASSOCIATED_NEW_GENE	0	0.992504	false	0	71	58122		0.505362	[A0A7P0TBL1, A0A804GS07, I3L1U9, I3L3I0, I3L3R2, I3L4N8, J3KT65, K7EM38, P63261, Q6PJ43, Q96FU6]	71
			3.15495	0.00330679			2.Plasma Membrane	2.Plasma Membrane, 3.Intra Cellular	0.316962	2	4	ENSG00000077585	GENE-nonsense_mediated_decay,processed_transcript,protein_coding,retained_intron	7107	GPR137B	GPR137B			false	7107	317	0	2	ASSOCIATED_NEW_GENE	0	0.99349	false	0	7107	174364		0.51634	[H0Y509, O60478, Q5TAF0]	7107
			3.40205	0.00402853			2.Plasma Membrane	2.Plasma Membrane, 3.Intra Cellular	0.293941	2	4	ENSG00000140416	GENE-nonsense_mediated_decay,processed_transcript,protein_coding,retained_intron	7168	TPM1	TPM1			false	7168	219.5	0	2	ASSOCIATED_NEW_GENE	0	0.992743	false	0	7168	170856		0.506961	[A0A024R5W6, A0A087WTJ7, A0A0K0K1I0, A0A0S2Z4G6, A0A494BZZ2, A0A494C0I0, A0A494C0V8, B7Z596, B7Z722, D9YZV4, D9YZV5, D9YZV7, F5H7S3, H0YK48, H0YKJ4, H0YKP3, H0YKX5, H0YL42, H0YL80, H0YLS7, H0YN06, H7BYY1, O15513, P09493, Q6ZN40, Q8TCG4]	7168
			3.40341	0.00568729			1.Extracellular	1.Extracellular, 2.Plasma Membrane	0.293823	2	4	ENSG00000157131	GENE-non_stop_decay,nonsense_mediated_decay,processed_transcript,protein_coding,retained_intron	731	C8A	C8A			false	731	218	0	2	ASSOCIATED_NEW_GENE	0	0.992739	false	0	731	167080		0.504651	[P07357, Q05CV2]	731
			3.18362	0.00188289			1.Extracellular	1.Extracellular, 2.Plasma Membrane, 3.Intra Cellular	0.314108	2	4	ENSG00000162692	GENE-nonsense_mediated_decay,protein_coding,retained_intron	7412	VCAM1	VCAM1			false	7412	313.5	0	2	ASSOCIATED_NEW_GENE	0	0.993403	false	0	7412	154748		0.528765	[A0A3B3ISS8, E9PDD2, F2YYR6, F8UU18, F8UV74, G0ZFQ0, G0ZI12, P19320]	7412
			3.15358	0.00298241			1.Extracellular	1.Extracellular, 2.Plasma Membrane, 3.Intra Cellular	0.3171	2	4	ENSG00000035403	GENE-nonsense_mediated_decay,processed_transcript,protein_coding,retained_intron	7414	VCL	VCL			false	7414	319	0	2	ASSOCIATED_NEW_GENE	0	0.993494	false	0	7414	173450		0.51876	[A0A024QZN4, A0A096LPE1, A0A7R6M8P5, A0A7R6RQ50, B3KXA2, P18206, V9HWK2]	7414
			3.5413	0			1.Extracellular	1.Extracellular, 2.Plasma Membrane, 3.Intra Cellular	0.282382	2	4	ENSG00000125084	GENE-protein_coding	7471	WNT1	WNT1			false	7471	331	0	2	ASSOCIATED_NEW_GENE	1	0.992322	false	0	7471	0		0	[A0A087WXR9, P04628]	7471
			3.18362	0.00188289			0.Annotation definition not found in 'Homo Sapiens.properties' file	0.Annotation definition not found in 'Homo Sapiens.properties' file	0.314108	2	4	ENSG00000130818	GENE-nonsense_mediated_decay,protein_coding	79088	ZNF426	ZNF426			false	79088	313.5	0	2	ASSOCIATED_NEW_GENE	0	0.993403	false	0	79088	154748		0.528765	[A0A024R7D7, A0A1B0GUG0, K7EME3, K7ER43, Q59EH4, Q9BUY5]	79088
			3.43208	0.0047573			2.Plasma Membrane	2.Plasma Membrane	0.291368	2	4	ENSG00000006831	GENE-processed_transcript,protein_coding	79602	ADIPOR2	ADIPOR2			false	79602	208	0	2	ASSOCIATED_NEW_GENE	0	0.992652	false	0	79602	174496		0.506112	[Q86V24]	79602
			3.18362	0.00188289			0.Annotation definition not found in 'Homo Sapiens.properties' file	0.Annotation definition not found in 'Homo Sapiens.properties' file	0.314108	2	4	ENSG00000188295	GENE-protein_coding	79862	ZNF669	ZNF669			false	79862	313.5	0	2	ASSOCIATED_NEW_GENE	0	0.993403	false	0	79862	154748		0.528765	[E5RI66, Q5VT36, Q5VT37, Q96BR6]	79862
			3.15495	0.00330679			0.Annotation definition not found in 'Homo Sapiens.properties' file	0.Annotation definition not found in 'Homo Sapiens.properties' file	0.316962	2	4	ENSG00000172000	GENE-nonsense_mediated_decay,protein_coding	80032	ZNF556	ZNF556			false	80032	317	0	2	ASSOCIATED_NEW_GENE	0	0.99349	false	0	80032	174364		0.51634	[A0A0C4DGQ3, K7EKA5, Q9HAH1]	80032
			3.50853	0.00188579			0.Annotation definition not found in 'Homo Sapiens.properties' file	0.Annotation definition not found in 'Homo Sapiens.properties' file	0.285019	2	4	ENSG00000174010	GENE-protein_coding	80311	KLHL15	KLHL15			false	80311	179	0	2	ASSOCIATED_NEW_GENE	0	0.992421	false	0	80311	69650		0.504249	[L8EB72, Q96M94, V9HWF1]	80311
			3.15768	0.00340227			1.Extracellular	1.Extracellular, 2.Plasma Membrane, 3.Intra Cellular, 5.Nucleus	0.316688	2	4	ENSG00000101152	GENE-nonsense_mediated_decay,protein_coding	80331	DNAJC5	DNAJC5			false	80331	315.5	0	2	ASSOCIATED_NEW_GENE	0	0.993481	false	0	80331	173290		0.515574	[Q6AHX3, Q9H3Z4]	80331
			3.40478	0.00519715			1.Extracellular	1.Extracellular, 3.Intra Cellular	0.293705	2	4	ENSG00000221963	GENE-protein_coding	80830	APOL6	APOL6			false	80830	217.5	0	2	ASSOCIATED_NEW_GENE	0	0.992735	false	0	80830	188542		0.504662	[B3KTP4, Q9BWW8]	80830
			3.15358	0.00298241			0.Annotation definition not found in 'Homo Sapiens.properties' file	0.Annotation definition not found in 'Homo Sapiens.properties' file	0.3171	2	4	ENSG00000167548	GENE-nonsense_mediated_decay,processed_transcript,protein_coding,retained_intron	8085	KMT2D	KMT2D			false	8085	319	0	2	ASSOCIATED_NEW_GENE	0	0.993494	false	0	8085	173450		0.51876	[A0A2S0X0M0, A0A3B3ISC8, A0A804HHR9, A0A804HJB5, O14686, Q59FG6, Q6PIA1]	8085
			3.15495	0.00330679			1.Extracellular	1.Extracellular, 2.Plasma Membrane, 3.Intra Cellular	0.316962	2	4	ENSG00000124151	GENE-processed_transcript,protein_coding	8202	NCOA3	NCOA3			false	8202	317	0	2	ASSOCIATED_NEW_GENE	0	0.99349	false	0	8202	174364		0.51634	[Q0IIN7, Q569F6, Q59EE8, Q9Y6Q9]	8202
			3.5413	0			2.Plasma Membrane	2.Plasma Membrane, 3.Intra Cellular	0.282382	2	4	ENSG00000168646	GENE-protein_coding,retained_intron	8313	AXIN2	AXIN2			false	8313	331	0	2	ASSOCIATED_NEW_GENE	1	0.992322	false	0	8313	0		0	[A0A024R8J7, A0A024R8M3, A0A087WXP8, A0A1B0GX50, B7ZKL5, E7ES00, F5GX43, J3QQJ3, J3QRK4, Q9BRF5, Q9Y2T1]	8313
			3.40205	0.00402853			1.Extracellular	1.Extracellular	0.293941	2	4	ENSG00000184260	GENE-protein_coding	8338	H2AC20	H2AC20			false	8338	219.5	0	2	ASSOCIATED_NEW_GENE	0	0.992743	false	0	8338	170856		0.506961	[Q16777]	8338
			3.15495	0.00330679			2.Plasma Membrane	2.Plasma Membrane, 3.Intra Cellular	0.316962	2	4	ENSG00000120519	GENE-processed_transcript,protein_coding,retained_intron	84068	SLC10A7	SLC10A7			false	84068	317	0	2	ASSOCIATED_NEW_GENE	0	0.99349	false	0	84068	174364		0.51634	[Q0GE19]	84068
			4.06689	0			3.Intra Cellular	3.Intra Cellular	0.245888	2	6	ENSG00000132906	GENE-nonsense_mediated_decay,protein_coding,retained_intron	842	CASP9	CASP9			false	842	108	0	2	ASSOCIATED_NEW_GENE	1	0.990734	false	0	842	0		0	[A0A087WX72, F8VVS7, F8VWA5, H0Y3S8, H0Y6Y2, P55211, Q5JRU2, Q5JRU8]	842
			3.43345	0.00456683			0.Annotation definition not found in 'Homo Sapiens.properties' file	0.Annotation definition not found in 'Homo Sapiens.properties' file	0.291252	2	4	ENSG00000185278	GENE-protein_coding	84614	ZBTB37	ZBTB37			false	84614	207.5	0	2	ASSOCIATED_NEW_GENE	0	0.992648	false	0	84614	212888		0.506127	[B7Z7Z4, Q5TC79]	84614
			3.50034	0.00295828			3.Intra Cellular	3.Intra Cellular	0.285686	2	4	ENSG00000108306	GENE-protein_coding	84961	FBXL20	FBXL20			false	84961	182.5	0	2	ASSOCIATED_NEW_GENE	0	0.992446	false	0	84961	107572		0.505571	[A0A2R8Y677, J3KTA1, J3QKL3, Q96IG2]	84961
			3.18362	0.00188289			1.Extracellular	1.Extracellular, 2.Plasma Membrane, 5.Nucleus	0.314108	2	4	ENSG00000101654	GENE-nonsense_mediated_decay,processed_transcript,protein_coding,retained_intron	8731	RNMT	RNMT			false	8731	313.5	0	2	ASSOCIATED_NEW_GENE	0	0.993403	false	0	8731	154748		0.528765	[A8K946, K7EP06, K7EPP5, K7ERH6, O43148, Q05D80, Q05DQ2]	8731
			3.40341	0.00568729			3.Intra Cellular	3.Intra Cellular	0.293823	2	4	ENSG00000114166	GENE-processed_transcript,protein_coding,retained_intron	8850	KAT2B	KAT2B			false	8850	218	0	2	ASSOCIATED_NEW_GENE	0	0.992739	false	0	8850	167080		0.504651	[Q92831]	8850
			3.40478	0.00519715			3.Intra Cellular	3.Intra Cellular, 5.Nucleus	0.293705	2	4	ENSG00000132326	GENE-processed_transcript,protein_coding,retained_intron	8864	PER2	PER2			false	8864	217.5	0	2	ASSOCIATED_NEW_GENE	0	0.992735	false	0	8864	188542		0.504662	[E9PD89, L8E8R3, O15055]	8864
			3.18362	0.00188289			3.Intra Cellular	3.Intra Cellular	0.314108	2	4	ENSG00000138641	GENE-processed_transcript,protein_coding,retained_intron	8916	HERC3	HERC3			false	8916	313.5	0	2	ASSOCIATED_NEW_GENE	0	0.993403	false	0	8916	154748		0.528765	[B4DK41, C9J6Z1, C9J8E7, C9JFL2, C9JKA7, H0Y8G9, Q15034, Q4W5H5]	8916
			3.17816	0.00567528			0.Annotation definition not found in 'Homo Sapiens.properties' file	0.Annotation definition not found in 'Homo Sapiens.properties' file	0.314648	2	4	ENSG00000163214	GENE-nonsense_mediated_decay,processed_transcript,protein_coding,retained_intron	90957	DHX57	DHX57			false	90957	303.5	0	2	ASSOCIATED_NEW_GENE	0	0.993419	false	0	90957	170054		0.508403	[A0A087WW12, A0A087WZ11, H7BZ23, H7C109, L8ECP8, Q6P158, Q8N4U2]	90957
			3.17816	0.00567528			3.Intra Cellular	3.Intra Cellular	0.314648	2	4	ENSG00000145782	GENE-nonsense_mediated_decay,processed_transcript,protein_coding,retained_intron	9140	ATG12	ATG12			false	9140	303.5	0	2	ASSOCIATED_NEW_GENE	0	0.993419	false	0	9140	170054		0.508403	[C1IDX9, D6RB14, H0Y9W4, H0YA29, H7BYD7, O94817]	9140
			3.47031	0.00437311	Transcription Factor Complex		0.Annotation definition not found in 'Homo Sapiens.properties' file	0.Annotation definition not found in 'Homo Sapiens.properties' file	0.288159	2	4	ENSG00000156030	GENE-nonsense_mediated_decay,processed_transcript,protein_coding,retained_intron	91748	MIDEAS	MIDEAS			false	91748	192.5	0	2	ASSOCIATED_NEW_GENE	0	0.992537	false	0	91748	94578		0.502625	[A0A024R689, A0A0A0MSU2, A0A1C7CYX1, C9JYU7, H7C1L3, Q6PJG2]	91748
			3.91399	0.00442515			0.Annotation definition not found in 'Homo Sapiens.properties' file	0.Annotation definition not found in 'Homo Sapiens.properties' file	0.255494	2	6	ENSG00000116754	GENE-nonsense_mediated_decay,processed_transcript,protein_coding,retained_intron	9295	SRSF11	SRSF11			false	9295	83.5	0	2	ASSOCIATED_NEW_GENE	0	0.991196	false	0	9295	22768		0.5	[B4DWT1, Q05519, Q5T757, Q5T760, S4R3C4]	9295
			3.5099	0.00533867			3.Intra Cellular	3.Intra Cellular, 5.Nucleus	0.284909	2	4	ENSG00000141543	GENE-protein_coding,retained_intron	9775	EIF4A3	EIF4A3			false	9775	177.5	0	2	ASSOCIATED_NEW_GENE	0	0.992417	false	0	9775	61910		0.50142	[A0A024R8W0, I3L3H2, P38919]	9775
			3.51536	0.00293466			3.Intra Cellular	3.Intra Cellular	0.284466	2	4	ENSG00000119682	GENE-nonsense_mediated_decay,processed_transcript,protein_coding,retained_intron	9870	AREL1	AREL1			false	9870	176.5	0	2	ASSOCIATED_NEW_GENE	0	0.992401	false	0	9870	53844		0.50431	[A0A7P0T811, A0A7P0Z4H7, G3V245, G3V2B5, G3V506, G3V5P7, H0YJ67, H0YJ69, O15033]	9870
			3.48123	0.00258862			3.Intra Cellular	3.Intra Cellular	0.287255	2	4	ENSG00000116688	GENE-nonsense_mediated_decay,processed_transcript,protein_coding,retained_intron	9927	MFN2	MFN2			false	9927	189.5	0	2	ASSOCIATED_NEW_GENE	0	0.992504	false	0	9927	58122		0.505362	[A0A6Q8PFJ4, A0A6Q8PFT5, A0A6Q8PGA3, A0A6Q8PGR2, A0A6Q8PGS9, A0A6Q8PGV8, A0A6Q8PH07, O95140, Q5JXC5]	9927
			3.5413	0			1.Extracellular	1.Extracellular, 2.Plasma Membrane, 3.Intra Cellular	0.282382	1	4	ENSG00000113552	GENE-protein_coding,retained_intron	10007	GNPDA1	GNPDA1			false	10007	331	0	1	ASSOCIATED_NEW_GENE	0	0.992322	false	0	10007	0		0	[D6R917, D6R9P4, D6RAY7, D6RB13, D6RFF8, D6RFK5, P46926]	10007
			3.54676	0			2.Plasma Membrane	2.Plasma Membrane, 3.Intra Cellular, 5.Nucleus	0.281948	1	4	ENSG00000177485	GENE-protein_coding	10009	ZBTB33	ZBTB33			false	10009	327	0	1	ASSOCIATED_NEW_GENE	0	0.992306	false	0	10009	0		0	[L8E7W8, Q86T24]	10009
			3.58362	0			3.Intra Cellular	3.Intra Cellular, 4.Nuclear Membrane	0.279048	1	4	ENSG00000272391	GENE-processed_transcript,protein_coding,retained_intron	100101267	POM121C	POM121C			false	100101267	300	0	1	ASSOCIATED_NEW_GENE	0	0.992195	false	0	100101267	0		0	[A1L4L9, A8CG34, A8MY32, B4DDR5, B4DET5, C9JFL1]	100101267
			3.5413	0			0.Annotation definition not found in 'Homo Sapiens.properties' file	0.Annotation definition not found in 'Homo Sapiens.properties' file	0.282382	1	4	ENSG00000228630	GENE-lncRNA	100124700	HOTAIR	HOTAIR			false	100124700	331	0	1	ASSOCIATED_NEW_GENE	0	0.992322	false	0	100124700	0		0		100124700
			4.06689	0			0.Annotation definition not found in 'Homo Sapiens.properties' file	0.Annotation definition not found in 'Homo Sapiens.properties' file	0.245888	1	6			100128295	100128295	100128295			false	100128295	108	0	1	ASSOCIATED_NEW_GENE	0	0.990734	false	0	100128295	0		0		100128295
			3.54676	0			2.Plasma Membrane	2.Plasma Membrane, 3.Intra Cellular	0.281948	1	4	ENSG00000094631	GENE-nonsense_mediated_decay,processed_transcript,protein_coding,retained_intron	10013	HDAC6	HDAC6			false	10013	327	0	1	ASSOCIATED_NEW_GENE	0	0.992306	false	0	10013	0		0	[A0A024QZ26, A0A2R8Y4G2, A0A2R8Y559, A0A2R8Y5Z4, A0A2R8Y6Z9, A0A2R8Y758, A0A2R8YCS4, A0A2R8YD35, A0A2R8YDE6, A0A2R8YGC5, A6NDI8, B4DZH6, C9J172, C9JEF4, E7EP63, E7ER52, H7C0Z9, Q9BRX7, Q9NSW6, Q9UBN7]	10013
			4.16655	0			0.Annotation definition not found in 'Homo Sapiens.properties' file	0.Annotation definition not found in 'Homo Sapiens.properties' file	0.240007	1	6	ENSG00000204767	GENE-processed_transcript,protein_coding	100131897	INSYN2B	INSYN2B			false	100131897	58	0	1	ASSOCIATED_NEW_GENE	0	0.990433	false	0	100131897	0		0	[A6NMK8]	100131897
			3.5413	0			2.Plasma Membrane	2.Plasma Membrane	0.282382	1	4	ENSG00000272398	GENE-processed_transcript,protein_coding	100133941	CD24	CD24			false	100133941	331	0	1	ASSOCIATED_NEW_GENE	0	0.992322	false	0	100133941	0		0	[A0A087WU21, A0A087WU87, A0A087WW33, P25063]	100133941
			3.58362	0			1.Extracellular	1.Extracellular, 2.Plasma Membrane, 3.Intra Cellular	0.279048	1	4	ENSG00000170248	GENE-nonsense_mediated_decay,processed_transcript,protein_coding,retained_intron	10015	PDCD6IP	PDCD6IP			false	10015	300	0	1	ASSOCIATED_NEW_GENE	0	0.992195	false	0	10015	0		0	[A0A3B3IT07, C9IZF9, F8WBR8, F8WDK9, F8WEQ7, Q8WUM4]	10015
			4.06689	0			2.Plasma Membrane	2.Plasma Membrane, 3.Intra Cellular	0.245888	1	6	ENSG00000138622	GENE-protein_coding	10021	HCN4	HCN4			false	10021	108	0	1	ASSOCIATED_NEW_GENE	0	0.990734	false	0	10021	0		0	[Q9Y3Q4]	10021
			3.5413	0			1.Extracellular	1.Extracellular, 2.Plasma Membrane, 3.Intra Cellular	0.282382	1	4	ENSG00000100284	GENE-nonsense_mediated_decay,protein_coding,retained_intron	10043	TOM1	TOM1			false	10043	331	0	1	ASSOCIATED_NEW_GENE	0	0.992322	false	0	10043	0		0	[B0QY01, B0QY02, B3KUF5, B3KUU1, F8WAW7, F8WB30, F8WBB0, F8WE29, H7BYN7, O60784, V9GYF4, V9GZ68]	10043
			3.99317	0			1.Extracellular	1.Extracellular, 3.Intra Cellular	0.250427	1	6	ENSG00000256618	GENE-protein_coding	100462977	MTRNR2L1	MTRNR2L1			false	100462977	109	0	1	ASSOCIATED_NEW_GENE	0	0.990957	false	0	100462977	0		0	[P0CJ68]	100462977
			3.99317	0			1.Extracellular	1.Extracellular, 3.Intra Cellular	0.250427	1	6	ENSG00000232196	GENE-protein_coding	100463285	MTRNR2L4	MTRNR2L4			false	100463285	109	0	1	ASSOCIATED_NEW_GENE	0	0.990957	false	0	100463285	0		0	[P0CJ71]	100463285
			3.99317	0			1.Extracellular	1.Extracellular, 3.Intra Cellular	0.250427	1	6	ENSG00000270672	GENE-protein_coding	100463482	MTRNR2L6	MTRNR2L6			false	100463482	109	0	1	ASSOCIATED_NEW_GENE	0	0.990957	false	0	100463482	0		0	[P0CJ73]	100463482
			3.99317	0			1.Extracellular	1.Extracellular, 3.Intra Cellular	0.250427	1	6	ENSG00000255823	GENE-protein_coding	100463486	MTRNR2L8	MTRNR2L8			false	100463486	109	0	1	ASSOCIATED_NEW_GENE	0	0.990957	false	0	100463486	0		0	[P0CJ75, P0DMP1]	100463486
			3.5413	0			3.Intra Cellular	3.Intra Cellular	0.282382	1	4	ENSG00000105993	GENE-nonsense_mediated_decay,processed_transcript,protein_coding,retained_intron	10049	DNAJB6	DNAJB6			false	10049	331	0	1	ASSOCIATED_NEW_GENE	0	0.992322	false	0	10049	0		0	[A0A0J9YX62, C9J2C4, C9J2P2, C9JB42, C9JDR7, C9JDX6, C9JN01, E9PH18, F8WCZ4, O75190, Q49A72, Q75MP3]	10049
			4.06689	0			1.Extracellular	1.Extracellular, 2.Plasma Membrane, 3.Intra Cellular	0.245888	1	6	ENSG00000249884	GENE-protein_coding	100526767	RNF103-CHMP3	RNF103-CHMP3			false	100526767	108	0	1	ASSOCIATED_NEW_GENE	0	0.990734	false	0	100526767	0		0	[A0A140T963, Q9Y3E7]	100526767
			3.54676	0			0.Annotation definition not found in 'Homo Sapiens.properties' file	0.Annotation definition not found in 'Homo Sapiens.properties' file	0.281948	1	4	ENSG00000026036	GENE-nonsense_mediated_decay,retained_intron	100533107	RTEL1-TNFRSF6B	RTEL1-TNFRSF6B			false	100533107	327	0	1	ASSOCIATED_NEW_GENE	0	0.992306	false	0	100533107	0		0	[D6RA96]	100533107
			3.54676	0			1.Extracellular	1.Extracellular, 3.Intra Cellular	0.281948	1	4	ENSG00000140497	GENE-nonsense_mediated_decay,protein_coding,retained_intron	10066	SCAMP2	SCAMP2			false	10066	327	0	1	ASSOCIATED_NEW_GENE	0	0.992306	false	0	10066	0		0	[A0A140VK92, A8K769, H3BMN2, H3BN93, H3BPL9, H3BQW2, H3BUB6, H3BV04, O15127, Q6IBK3]	10066
			3.5413	0			3.Intra Cellular	3.Intra Cellular	0.282382	1	4	ENSG00000111962	GENE-processed_transcript,protein_coding	10090	UST	UST			false	10090	331	0	1	ASSOCIATED_NEW_GENE	0	0.992322	false	0	10090	0		0	[Q9Y2C2]	10090
			4.06689	0			1.Extracellular	1.Extracellular, 3.Intra Cellular	0.245888	1	6	ENSG00000162704	GENE-processed_transcript,protein_coding,retained_intron	10092	ARPC5	ARPC5			false	10092	108	0	1	ASSOCIATED_NEW_GENE	0	0.990734	false	0	10092	0		0	[B1ALC0, O15511, Q6IPM3]	10092
			3.54676	0			1.Extracellular	1.Extracellular, 2.Plasma Membrane, 3.Intra Cellular	0.281948	1	4	ENSG00000140945	GENE-nonsense_mediated_decay,processed_transcript,protein_coding,retained_intron	1012	CDH13	CDH13			false	1012	327	0	1	ASSOCIATED_NEW_GENE	0	0.992306	false	0	1012	0		0	[B7Z3H7, B7Z9B1, F5H7W7, H3BQH4, H3BRL7, H3BTF2, H3BV21, P55290]	1012
			4.07099	0			1.Extracellular	1.Extracellular, 3.Intra Cellular	0.245641	1	6	ENSG00000115073	GENE-protein_coding,retained_intron	10120	ACTR1B	ACTR1B			false	10120	48	0	1	ASSOCIATED_NEW_GENE	0	0.990722	false	0	10120	0		0	[P42025]	10120
			3.5413	0			1.Extracellular	1.Extracellular, 3.Intra Cellular	0.282382	1	4	ENSG00000105835	GENE-nonsense_mediated_decay,processed_transcript,protein_coding,retained_intron	10135	NAMPT	NAMPT			false	10135	331	0	1	ASSOCIATED_NEW_GENE	0	0.992322	false	0	10135	0		0	[A0A024R718, A0A0C4DFS8, A0A7P0T862, A0A7P0T895, A0A7P0T8D2, A0A7P0T8L3, A0A7P0T8R4, A0A7P0T8Z3, A0A7P0T931, A0A7P0T941, A0A7P0T973, A0A7P0T9F0, A0A7P0T9I9, A0A7P0TA73, A0A7P0TAI8, A0A7P0TAS5, A0A7P0TAZ2, A0A7P0TB17, A0A7P0TBB7, A0A7P0Z437, A0A7P0Z466, A0A7P0Z4L4, A0A7P0Z4N0, B7Z8W6, C9JF35, C9JG65, P43490]	10135
			3.54676	0			3.Intra Cellular	3.Intra Cellular	0.281948	1	4	ENSG00000138640	GENE-nonsense_mediated_decay,processed_transcript,protein_coding,retained_intron	10144	FAM13A	FAM13A			false	10144	327	0	1	ASSOCIATED_NEW_GENE	0	0.992306	false	0	10144	0		0	[A0A2X0SFT1, D6RCC1, D6RD35, D6RFM4, D6RGE4, D6RIY4, E9PGM7, L0R4X6, O94988, Q6P521]	10144
			3.58362	0			3.Intra Cellular	3.Intra Cellular	0.279048	1	4	ENSG00000145907	GENE-nonsense_mediated_decay,processed_transcript,protein_coding,retained_intron	10146	G3BP1	G3BP1			false	10146	300	0	1	ASSOCIATED_NEW_GENE	0	0.992195	false	0	10146	0		0	[A0A7I2V274, A0A7I2V2S5, A0A7I2V2V1, A0A7I2V2X7, A0A7I2V326, A0A7I2V3C4, A0A7I2V3V2, A0A7I2V3Y4, A0A7I2V494, A0A7I2V496, A0A7I2V4D8, A0A7I2V4Y8, A0A7I2V533, A0A7I2V548, A0A7I2V565, A0A7I2V5H1, A0A7I2V5M7, A0A7I2V651, A0A7I2YQB1, A0A7I2YQC2, A0A7I2YQF2, A0A7I2YQH0, A0A7I2YQM1, A0A7I2YQN9, A0A7I2YQP3, A0A7I2YQQ8, A0A7I2YQR4, A0A7I2YQU8, A0A7P0P2U7, E5RH00, E5RH42, E5RI46, E5RIF8, E5RJU8, Q13283, Q3…	10146
			3.5413	0			1.Extracellular	1.Extracellular, 2.Plasma Membrane, 3.Intra Cellular	0.282382	1	4	ENSG00000158195	GENE-protein_coding	10163	WASF2	WASF2			false	10163	331	0	1	ASSOCIATED_NEW_GENE	0	0.992322	false	0	10163	0		0	[Q05BU7, Q9Y6W5]	10163
			3.58362	0	Transcription Factor Complex		3.Intra Cellular	3.Intra Cellular	0.279048	1	4	ENSG00000123374	GENE-nonsense_mediated_decay,processed_transcript,protein_coding,retained_intron	1017	CDK2	CDK2			false	1017	300	0	1	ASSOCIATED_NEW_GENE	0	0.992195	false	0	1017	0		0	[A0A024RB10, A0A024RB77, B4DDL9, E7ESI2, G3V317, G3V5T9, P24941]	1017
			3.5413	0	Transcription Factor Complex		3.Intra Cellular	3.Intra Cellular, 4.Nuclear Membrane, 5.Nucleus	0.282382	1	4	ENSG00000135446	GENE-nonsense_mediated_decay,processed_transcript,protein_coding,retained_intron	1019	CDK4	CDK4			false	1019	331	0	1	ASSOCIATED_NEW_GENE	0	0.992322	false	0	1019	0		0	[A0A024RBB6, A0A6H0CER3, F8VTV8, F8VWX7, F8VXD2, F8VYH9, F8VYY1, F8VZ13, F8VZ51, F8VZZ0, F8W1L8, P11802, Q6LC83, Q96BE9]	1019
			4.07099	0			3.Intra Cellular	3.Intra Cellular	0.245641	1	6	ENSG00000123136	GENE-nonsense_mediated_decay,processed_transcript,protein_coding,retained_intron	10212	DDX39A	DDX39A			false	10212	48	0	1	ASSOCIATED_NEW_GENE	0	0.990722	false	0	10212	0		0	[A0A0D9SEM9, K7EIL8, K7EL56, K7EN69, K7ENP6, K7EPJ3, K7EQN7, O00148]	10212
			3.58362	0			1.Extracellular	1.Extracellular, 3.Intra Cellular	0.279048	1	4	ENSG00000115233	GENE-protein_coding,retained_intron	10213	PSMD14	PSMD14			false	10213	300	0	1	ASSOCIATED_NEW_GENE	0	0.992195	false	0	10213	0		0	[A0A140VKF2, C9JW37, O00487, Q4ZG77, Q53TH1]	10213
			4.07235	0			3.Intra Cellular	3.Intra Cellular	0.245558	1	6	ENSG00000173334	GENE-processed_transcript,protein_coding	10221	TRIB1	TRIB1			false	10221	46	0	1	ASSOCIATED_NEW_GENE	0	0.990718	false	0	10221	0		0	[E5RFH4, Q96RU8]	10221
			3.57406	0			0.Annotation definition not found in 'Homo Sapiens.properties' file	0.Annotation definition not found in 'Homo Sapiens.properties' file	0.279794	1	4	ENSG00000180855	GENE-nonsense_mediated_decay,protein_coding	10224	ZNF443	ZNF443			false	10224	307	0	1	ASSOCIATED_NEW_GENE	0	0.992223	false	0	10224	0		0	[F8WDY2, Q9Y2A4]	10224
			3.5413	0			3.Intra Cellular	3.Intra Cellular	0.282382	1	4	ENSG00000105355	GENE-protein_coding	10226	PLIN3	PLIN3			false	10226	331	0	1	ASSOCIATED_NEW_GENE	0	0.992322	false	0	10226	0		0	[A0A140VJN8, K7EJD0, K7EL96, K7ER39, K7ERZ3, O60664]	10226
			3.54676	0			1.Extracellular	1.Extracellular	0.281948	1	4	ENSG00000128606	GENE-processed_transcript,protein_coding	10234	LRRC17	LRRC17			false	10234	327	0	1	ASSOCIATED_NEW_GENE	0	0.992306	false	0	10234	0		0	[C9JT74, Q8N6Y2]	10234
			3.57406	0			3.Intra Cellular	3.Intra Cellular	0.279794	1	4	ENSG00000136436	GENE-nonsense_mediated_decay,processed_transcript,protein_coding,retained_intron	10241	CALCOCO2	CALCOCO2			false	10241	307	0	1	ASSOCIATED_NEW_GENE	0	0.992223	false	0	10241	0		0	[D6RBF9, D6RBI4, D6REB0, D6RF70, D6RJE7, H0Y9G3, H0YBP4, I3L493, I3L4E1, Q13137]	10241
			3.54676	0			2.Plasma Membrane	2.Plasma Membrane, 3.Intra Cellular	0.281948	1	4	ENSG00000136158	GENE-protein_coding	10253	SPRY2	SPRY2			false	10253	327	0	1	ASSOCIATED_NEW_GENE	0	0.992306	false	0	10253	0		0	[O43597]	10253
			3.5413	0			3.Intra Cellular	3.Intra Cellular	0.282382	1	4	ENSG00000115145	GENE-processed_transcript,protein_coding,retained_intron	10254	STAM2	STAM2			false	10254	331	0	1	ASSOCIATED_NEW_GENE	0	0.992322	false	0	10254	0		0	[O75886]	10254
			3.58362	0			2.Plasma Membrane	2.Plasma Membrane, 3.Intra Cellular, 5.Nucleus	0.279048	1	4	ENSG00000125257	GENE-nonsense_mediated_decay,processed_transcript,protein_coding,retained_intron	10257	ABCC4	ABCC4			false	10257	300	0	1	ASSOCIATED_NEW_GENE	0	0.992195	false	0	10257	0		0	[A0A2R8Y5Z3, A0A2R8Y6V8, A0A2R8YDC1, A0A2R8YDG7, A0A5C0NTB8, A8K2Q2, O15439, Q8IUA3, Q8IWU1]	10257
			3.57406	0			3.Intra Cellular	3.Intra Cellular, 5.Nucleus	0.279794	1	4	ENSG00000105127	GENE-nonsense_mediated_decay,processed_transcript,protein_coding,retained_intron	10270	AKAP8	AKAP8			false	10270	307	0	1	ASSOCIATED_NEW_GENE	0	0.992223	false	0	10270	0		0	[A0A7P0T893, A0A7P0TAA4, A0A7P0TBC8, M0QX51, O43823, Q8NE02]	10270
			3.54676	0			3.Intra Cellular	3.Intra Cellular	0.281948	1	4	ENSG00000118007	GENE-nonsense_mediated_decay,protein_coding,retained_intron	10274	STAG1	STAG1			false	10274	327	0	1	ASSOCIATED_NEW_GENE	0	0.992306	false	0	10274	0		0	[C9JJQ0, F8WCB3, F8WF82, H7C595, Q4LE48, Q68DW7, Q8WVM7]	10274
			3.5413	0			3.Intra Cellular	3.Intra Cellular, 5.Nucleus	0.282382	1	4	ENSG00000183763	GENE-nonsense_mediated_decay,processed_transcript,protein_coding,retained_intron	10293	TRAIP	TRAIP			false	10293	331	0	1	ASSOCIATED_NEW_GENE	0	0.992322	false	0	10293	0		0	[E7EN91, E7ETV1, E7EVC4, E7EW89, Q9BWF2]	10293
			4.07235	0			1.Extracellular	1.Extracellular, 2.Plasma Membrane, 3.Intra Cellular	0.245558	1	6	ENSG00000115266	GENE-protein_coding,retained_intron	10297	APC2	APC2			false	10297	46	0	1	ASSOCIATED_NEW_GENE	0	0.990718	false	0	10297	0		0	[A0A0C4DGQ0, B5MDS5, K7ELQ3, K7EN62, K7ERC5, O95996, Q9UNL8]	10297
			3.58362	0			0.Annotation definition not found in 'Homo Sapiens.properties' file	0.Annotation definition not found in 'Homo Sapiens.properties' file	0.279048	1	4	ENSG00000185947	GENE-nonsense_mediated_decay,protein_coding,retained_intron	10308	ZNF267	ZNF267			false	10308	300	0	1	ASSOCIATED_NEW_GENE	0	0.992195	false	0	10308	0		0	[H3BMG2, H3BNA3, H3BPW2, I3L4I6, Q14586]	10308
			3.5413	0			3.Intra Cellular	3.Intra Cellular	0.282382	1	4	ENSG00000123080	GENE-protein_coding	1031	CDKN2C	CDKN2C			false	1031	331	0	1	ASSOCIATED_NEW_GENE	0	0.992322	false	0	1031	0		0	[P42773, Q6ICV4, Q9P1T2]	1031
			3.54676	0			3.Intra Cellular	3.Intra Cellular	0.281948	1	4	ENSG00000145901	GENE-nonsense_mediated_decay,processed_transcript,protein_coding,retained_intron	10318	TNIP1	TNIP1			false	10318	327	0	1	ASSOCIATED_NEW_GENE	0	0.992306	false	0	10318	0		0	[A0A0A0MRZ4, A8K4N4, B7Z8K2, E7EMV7, E7EW15, E7EW68, E7EWG2, H0YC17, Q15025]	10318
			3.5413	0			1.Extracellular	1.Extracellular, 2.Plasma Membrane, 3.Intra Cellular	0.282382	1	4	ENSG00000117448	GENE-processed_transcript,protein_coding	10327	AKR1A1	AKR1A1			false	10327	331	0	1	ASSOCIATED_NEW_GENE	0	0.992322	false	0	10327	0		0	[P14550, Q5T621, V9GYG2, V9GYP9, V9HWI0]	10327
			3.58362	0			2.Plasma Membrane	2.Plasma Membrane, 3.Intra Cellular	0.279048	1	4	ENSG00000174130	GENE-protein_coding	10333	TLR6	TLR6			false	10333	300	0	1	ASSOCIATED_NEW_GENE	0	0.992195	false	0	10333	0		0	[B2R933, B6CH37, B6CH42, B6CH44, B6CH45, B6RFS7, D1CS91, D1CS92, D1CS93, D1CS96, D1CS97, D1CS98, D1CS99, D1CSA0, D6R979, D6RAV7, Q9Y2C9]	10333
			3.57406	0			0.Annotation definition not found in 'Homo Sapiens.properties' file	0.Annotation definition not found in 'Homo Sapiens.properties' file	0.279794	1	4	ENSG00000185619	GENE-nonsense_mediated_decay,processed_transcript,protein_coding,retained_intron	10336	PCGF3	PCGF3			false	10336	307	0	1	ASSOCIATED_NEW_GENE	0	0.992223	false	0	10336	0		0	[A0A087WVH5, B3KQ06, B3KWT8, B4DTN5, B5MEC4, C9J3G7, C9JGV3, C9JYD0, F2Z3P3, Q3KNV8]	10336
			3.54676	0			2.Plasma Membrane	2.Plasma Membrane, 3.Intra Cellular, 5.Nucleus	0.281948	1	4	ENSG00000107833	GENE-processed_transcript,protein_coding	10360	NPM3	NPM3			false	10360	327	0	1	ASSOCIATED_NEW_GENE	0	0.992306	false	0	10360	0		0	[O75607]	10360
			3.58362	0			3.Intra Cellular	3.Intra Cellular, 4.Nuclear Membrane	0.279048	1	4	ENSG00000134255	GENE-processed_transcript,protein_coding	10390	CEPT1	CEPT1			false	10390	300	0	1	ASSOCIATED_NEW_GENE	0	0.992195	false	0	10390	0		0	[A0A0C4DGS9, A1PL14, Q9Y6K0]	10390
			3.57406	0			1.Extracellular	1.Extracellular, 2.Plasma Membrane, 3.Intra Cellular	0.279794	1	4	ENSG00000164741	GENE-processed_transcript,protein_coding,retained_intron	10395	DLC1	DLC1			false	10395	307	0	1	ASSOCIATED_NEW_GENE	0	0.992223	false	0	10395	0		0	[A0A0J9YWS8, A0A2X0SYX6, A8K119, E5RI70, Q45XF9, Q96QB1, R4GMP5]	10395
			3.54676	0			1.Extracellular	1.Extracellular, 2.Plasma Membrane, 3.Intra Cellular	0.281948	1	4	ENSG00000124406	GENE-nonsense_mediated_decay,protein_coding,retained_intron	10396	ATP8A1	ATP8A1			false	10396	327	0	1	ASSOCIATED_NEW_GENE	0	0.992306	false	0	10396	0		0	[H0Y8I6, H0YAA1, H0YAF4, H0YAJ4, Q4G1C1, Q9Y2Q0]	10396
			3.5413	0			1.Extracellular	1.Extracellular, 2.Plasma Membrane, 3.Intra Cellular	0.282382	1	4	ENSG00000104419	GENE-nonsense_mediated_decay,processed_transcript,protein_coding,retained_intron	10397	NDRG1	NDRG1			false	10397	331	0	1	ASSOCIATED_NEW_GENE	0	0.992322	false	0	10397	0		0	[A0A024R9I3, A0A6Q8PF06, A0A6Q8PF16, A0A6Q8PF28, A0A6Q8PF71, A0A6Q8PFB3, A0A6Q8PFG2, A0A6Q8PFP2, A0A6Q8PFR8, A0A6Q8PGD3, A0A6Q8PGF1, A0A6Q8PGJ1, A0A6Q8PHF2, A0A6Q8PHI0, A0A7I2ST14, B3KWB2, E5RG99, E5RGG6, E5RGM5, E5RH82, E5RI76, E5RIM2, E5RIR1, E5RIV1, E5RJ98, E5RJY1, E5RK17, E7ESM1, Q8N959, Q92597]	10397
			3.58362	0			1.Extracellular	1.Extracellular, 2.Plasma Membrane, 3.Intra Cellular	0.279048	1	4	ENSG00000204628	GENE-nonsense_mediated_decay,processed_transcript,protein_coding,retained_intron	10399	RACK1	RACK1			false	10399	300	0	1	ASSOCIATED_NEW_GENE	0	0.992195	false	0	10399	0		0	[D6R909, D6R9L0, D6R9Z1, D6RAC2, D6RAU2, D6RBD0, D6RDI0, D6REE5, D6RF23, D6RFX4, D6RFZ9, D6RGK8, D6RHH4, D6RHJ5, E9KL35, E9PD14, H0Y8R5, H0Y8W2, H0Y9P0, H0YAF8, H0YAM7, J3KPE3, P63244]	10399
			3.5413	0			3.Intra Cellular	3.Intra Cellular, 5.Nucleus	0.282382	1	4	ENSG00000197381	GENE-nonsense_mediated_decay,processed_transcript,protein_coding	104	ADARB1	ADARB1			false	104	331	0	1	ASSOCIATED_NEW_GENE	0	0.992322	false	0	104	0		0	[A0A0A0MSG8, P78563]	104
			3.99317	0			0.Annotation definition not found in 'Homo Sapiens.properties' file	0.Annotation definition not found in 'Homo Sapiens.properties' file	0.250427	1	6	ENSG00000113722	GENE-protein_coding	1044	CDX1	CDX1			false	1044	109	0	1	ASSOCIATED_NEW_GENE	0	0.990957	false	0	1044	0		0	[A0A087WTJ6, P47902, Q14DX0, Q4VAU3, Q4VAU5]	1044
			3.5413	0			3.Intra Cellular	3.Intra Cellular	0.282382	1	4	ENSG00000130204	GENE-nonsense_mediated_decay,protein_coding	10452	TOMM40	TOMM40			false	10452	331	0	1	ASSOCIATED_NEW_GENE	0	0.992322	false	0	10452	0		0	[K7EJ57, K7EKG4, K7EKG6, O96008]	10452
			3.58362	0			2.Plasma Membrane	2.Plasma Membrane, 3.Intra Cellular	0.279048	1	4	ENSG00000198689	GENE-nonsense_mediated_decay,processed_transcript,protein_coding,retained_intron	10479	SLC9A6	SLC9A6			false	10479	300	0	1	ASSOCIATED_NEW_GENE	0	0.992195	false	0	10479	0		0	[A0A0D9SFM4, A0A0D9SGH0, A0A1B0GTT2, A0A1B0GV11, A0A6Q8PFS7, A0A6Q8PGY5, A0A7I2V2B0, Q92581]	10479
			3.58362	0			1.Extracellular	1.Extracellular, 2.Plasma Membrane, 3.Intra Cellular	0.279048	1	4	ENSG00000131236	GENE-processed_transcript,protein_coding	10487	CAP1	CAP1			false	10487	300	0	1	ASSOCIATED_NEW_GENE	0	0.992195	false	0	10487	0		0	[D3DPU2, L8EAI0, Q01518, Q5T0R1, Q5T0R2, Q5T0R3, Q5T0R4, Q5T0R5, Q5T0R6, Q5T0R7, Q5T0R8, Q5T0R9, Q5T0S3]	10487
			3.54676	0			3.Intra Cellular	3.Intra Cellular	0.281948	1	4	ENSG00000142453	GENE-nonsense_mediated_decay,protein_coding,retained_intron	10498	CARM1	CARM1			false	10498	327	0	1	ASSOCIATED_NEW_GENE	0	0.992306	false	0	10498	0		0	[K7EIQ8, K7EK20, K7EPK1, K7EQA8, K7EQB9, K7ERM3, Q86X55]	10498
			4.16655	0			3.Intra Cellular	3.Intra Cellular, 5.Nucleus	0.240007	1	6	ENSG00000185736	GENE-processed_transcript,protein_coding	105	ADARB2	ADARB2			false	105	58	0	1	ASSOCIATED_NEW_GENE	0	0.990433	false	0	105	0		0	[A4VCH5, Q5VW43, Q86X17, Q9NS39]	105
			3.5413	0	Transcription Factor Complex		1.Extracellular	1.Extracellular, 2.Plasma Membrane, 3.Intra Cellular	0.282382	1	4	ENSG00000085872	GENE-processed_transcript,protein_coding,retained_intron	10523	CHERP	CHERP			false	10523	331	0	1	ASSOCIATED_NEW_GENE	0	0.992322	false	0	10523	0		0	[J3QK89, Q8IWX8]	10523
			3.54676	0			2.Plasma Membrane	2.Plasma Membrane	0.281948	1	4	ENSG00000117479	GENE-protein_coding,retained_intron	10560	SLC19A2	SLC19A2			false	10560	327	0	1	ASSOCIATED_NEW_GENE	0	0.992306	false	0	10560	0		0	[A0A024R8Y5, A0A024R928, A0A2R8Y5B5, B0FBR7, E3UTN9, I7BB09, O60779, Q7Z7J1]	10560
			3.58362	0			1.Extracellular	1.Extracellular, 3.Intra Cellular	0.279048	1	4	ENSG00000135624	GENE-nonsense_mediated_decay,processed_transcript,protein_coding,retained_intron	10574	CCT7	CCT7			false	10574	300	0	1	ASSOCIATED_NEW_GENE	0	0.992195	false	0	10574	0		0	[A0A0D9SG95, B7Z1C9, F8WAM2, F8WBP8, Q6IBT3, Q99832]	10574
			4.07099	0			1.Extracellular	1.Extracellular, 3.Intra Cellular	0.245641	1	6	ENSG00000100591	GENE-nonsense_mediated_decay,processed_transcript,protein_coding,retained_intron	10598	AHSA1	AHSA1			false	10598	48	0	1	ASSOCIATED_NEW_GENE	0	0.990722	false	0	10598	0		0	[G3V3W9, G3V438, H0YJ63, H0YJG7, H0YJU2, O95433]	10598
			3.5413	0			5.Nucleus	5.Nucleus	0.282382	1	4	ENSG00000183751	GENE-nonsense_mediated_decay,protein_coding,retained_intron	10607	TBL3	TBL3			false	10607	331	0	1	ASSOCIATED_NEW_GENE	0	0.992322	false	0	10607	0		0	[A0A087WYP7, A0JLS5, H3BN88, J3KNP2, Q12788]	10607
			4.06689	0			3.Intra Cellular	3.Intra Cellular	0.245888	1	6	ENSG00000163110	GENE-nonsense_mediated_decay,processed_transcript,protein_coding,retained_intron	10611	PDLIM5	PDLIM5			false	10611	108	0	1	ASSOCIATED_NEW_GENE	0	0.990734	false	0	10611	0		0	[A0A024RDE8, A0A0A0MSP3, A0A0D9SFR4, A0A0D9SFW3, B7Z481, B7Z8X5, D6RAA1, D6RGG6, H0Y8Y3, H0Y929, H0YBI4, Q96HC4]	10611
			3.5413	0			3.Intra Cellular	3.Intra Cellular	0.282382	1	4	ENSG00000107566	GENE-protein_coding	10613	ERLIN1	ERLIN1			false	10613	331	0	1	ASSOCIATED_NEW_GENE	0	0.992322	false	0	10613	0		0	[B0QZ43, O75477]	10613
			3.5413	0			3.Intra Cellular	3.Intra Cellular	0.282382	1	4	ENSG00000125826	GENE-nonsense_mediated_decay,processed_transcript,protein_coding,retained_intron	10616	RBCK1	RBCK1			false	10616	331	0	1	ASSOCIATED_NEW_GENE	0	0.992322	false	0	10616	0		0	[A6PVJ5, A6PVJ6, A6PVJ7, A6PVK0, B4DML5, G3XAG9, H0Y4S7, Q5JWR1, Q9BYM8]	10616
			3.57406	0			2.Plasma Membrane	2.Plasma Membrane, 3.Intra Cellular	0.279794	1	4	ENSG00000152291	GENE-protein_coding	10618	TGOLN2	TGOLN2			false	10618	307	0	1	ASSOCIATED_NEW_GENE	0	0.992223	false	0	10618	0		0	[A0A5F9UY30, A0A5H1ZRP2, O43493]	10618
			3.57406	0			0.Annotation definition not found in 'Homo Sapiens.properties' file	0.Annotation definition not found in 'Homo Sapiens.properties' file	0.279794	1	4	ENSG00000179361	GENE-processed_transcript,protein_coding,retained_intron	10620	ARID3B	ARID3B			false	10620	307	0	1	ASSOCIATED_NEW_GENE	0	0.992223	false	0	10620	0		0	[H3BQ92, Q8IVW6]	10620
			3.5413	0			3.Intra Cellular	3.Intra Cellular	0.282382	1	4	ENSG00000265972	GENE-protein_coding,retained_intron	10628	TXNIP	TXNIP			false	10628	331	0	1	ASSOCIATED_NEW_GENE	0	0.992322	false	0	10628	0		0	[B1ALI9, L8E7V6, Q9H3M7]	10628
			3.57406	0			1.Extracellular	1.Extracellular	0.279794	1	4	ENSG00000243709	GENE-processed_transcript,protein_coding	10637	LEFTY1	LEFTY1			false	10637	307	0	1	ASSOCIATED_NEW_GENE	0	0.992223	false	0	10637	0		0	[O75610]	10637
			3.5413	0			2.Plasma Membrane	2.Plasma Membrane, 3.Intra Cellular	0.282382	1	4	ENSG00000121774	GENE-processed_transcript,protein_coding	10657	KHDRBS1	KHDRBS1			false	10657	331	0	1	ASSOCIATED_NEW_GENE	0	0.992322	false	0	10657	0		0	[B4E043, Q07666]	10657
			3.5413	0			3.Intra Cellular	3.Intra Cellular	0.282382	1	4	ENSG00000155876	GENE-protein_coding	10670	RRAGA	RRAGA			false	10670	331	0	1	ASSOCIATED_NEW_GENE	0	0.992322	false	0	10670	0		0	[Q7L523]	10670
			3.58362	0			3.Intra Cellular	3.Intra Cellular	0.279048	1	4	ENSG00000134262	GENE-processed_transcript,protein_coding	10717	AP4B1	AP4B1			false	10717	300	0	1	ASSOCIATED_NEW_GENE	0	0.992195	false	0	10717	0		0	[A0A024R0J5, B1ALD0, B1ALD1, B1ALD2, B1ALD3, B3KSJ4, B4DTG3, Q9Y6B7]	10717
			3.5413	0			1.Extracellular	1.Extracellular, 2.Plasma Membrane, 3.Intra Cellular	0.282382	1	4	ENSG00000172757	GENE-processed_transcript,protein_coding,retained_intron	1072	CFL1	CFL1			false	1072	331	0	1	ASSOCIATED_NEW_GENE	0	0.992322	false	0	1072	0		0	[E9PK25, E9PLJ3, E9PP50, E9PQB7, E9PS23, G3V1A4, P23528, V9HWI5]	1072
			3.57406	0			2.Plasma Membrane	2.Plasma Membrane	0.279794	1	4	ENSG00000113504	GENE-nonsense_mediated_decay,protein_coding,retained_intron	10723	SLC12A7	SLC12A7			false	10723	307	0	1	ASSOCIATED_NEW_GENE	0	0.992223	false	0	10723	0		0	[A0A0G2JNW7, A0A0G2JQE3, A0A0U1RR10, A0A0U1RR18, H0YB78, L8E7W0, Q9Y666]	10723
			3.54676	0			1.Extracellular	1.Extracellular, 2.Plasma Membrane	0.281948	1	4	ENSG00000134121	GENE-nonsense_mediated_decay,processed_transcript,protein_coding	10752	CHL1	CHL1			false	10752	327	0	1	ASSOCIATED_NEW_GENE	0	0.992306	false	0	10752	0		0	[A0A087X0M8, C9J905, C9JEY3, C9JH37, C9JW79, F8WEP4, H7C0J0, O00533]	10752
			3.99317	0			3.Intra Cellular	3.Intra Cellular	0.250427	1	6	ENSG00000128989	GENE-processed_transcript,protein_coding	10776	ARPP19	ARPP19			false	10776	109	0	1	ASSOCIATED_NEW_GENE	0	0.990957	false	0	10776	0		0	[A0A024R5U3, H3BMD8, H3BQ52, H3BTD3, P56211]	10776
			3.54676	0			0.Annotation definition not found in 'Homo Sapiens.properties' file	0.Annotation definition not found in 'Homo Sapiens.properties' file	0.281948	1	4	ENSG00000174652	GENE-protein_coding,retained_intron	10781	ZNF266	ZNF266			false	10781	327	0	1	ASSOCIATED_NEW_GENE	0	0.992306	false	0	10781	0		0	[A0A024R7B6, A0A0B6XJX7, A0A3F2YPB8, Q14584]	10781
			3.58362	0			0.Annotation definition not found in 'Homo Sapiens.properties' file	0.Annotation definition not found in 'Homo Sapiens.properties' file	0.279048	1	4	ENSG00000198039	GENE-nonsense_mediated_decay,processed_transcript,protein_coding	10793	ZNF273	ZNF273			false	10793	300	0	1	ASSOCIATED_NEW_GENE	0	0.992195	false	0	10793	0		0	[E9PL30, Q14593, Q8WUX5, Q96HL5]	10793
			3.5413	0			3.Intra Cellular	3.Intra Cellular, 5.Nucleus	0.282382	1	4	ENSG00000156697	GENE-processed_transcript,protein_coding	10813	UTP14A	UTP14A			false	10813	331	0	1	ASSOCIATED_NEW_GENE	0	0.992322	false	0	10813	0		0	[Q9BVJ6, X6RJY0]	10813
			3.58362	0			0.Annotation definition not found in 'Homo Sapiens.properties' file	0.Annotation definition not found in 'Homo Sapiens.properties' file	0.279048	1	4	ENSG00000063587	GENE-processed_transcript,protein_coding,retained_intron	10838	ZNF275	ZNF275			false	10838	300	0	1	ASSOCIATED_NEW_GENE	0	0.992195	false	0	10838	0		0	[A6NFS0, Q9NSD4]	10838
			3.57406	0			2.Plasma Membrane	2.Plasma Membrane, 3.Intra Cellular	0.279794	1	4	ENSG00000101856	GENE-protein_coding	10857	PGRMC1	PGRMC1			false	10857	307	0	1	ASSOCIATED_NEW_GENE	0	0.992223	false	0	10857	0		0	[O00264, Q6IB11]	10857
			3.58362	0			1.Extracellular	1.Extracellular, 2.Plasma Membrane, 3.Intra Cellular	0.279048	1	4	ENSG00000042980	GENE-nonsense_mediated_decay,processed_transcript,protein_coding,retained_intron	10863	ADAM28	ADAM28			false	10863	300	0	1	ASSOCIATED_NEW_GENE	0	0.992195	false	0	10863	0		0	[A0A384NKT9, E5RGY1, E5RJQ1, H0YBG8, H0YBQ8, Q9UKQ2]	10863
			3.54676	0			2.Plasma Membrane	2.Plasma Membrane	0.281948	1	4	ENSG00000123901	GENE-protein_coding	10888	GPR83	GPR83			false	10888	327	0	1	ASSOCIATED_NEW_GENE	0	0.992306	false	0	10888	0		0	[F5GZ43, Q6NWR3, Q9NYM4]	10888
			3.54676	0			1.Extracellular	1.Extracellular, 3.Intra Cellular	0.281948	1	4	ENSG00000198162	GENE-processed_transcript,protein_coding	10905	MAN1A2	MAN1A2			false	10905	327	0	1	ASSOCIATED_NEW_GENE	0	0.992306	false	0	10905	0		0	[H0Y543, H0Y7H1, O60476, Q5T9E3]	10905
			3.5413	0			3.Intra Cellular	3.Intra Cellular	0.282382	1	4	ENSG00000032444	GENE-processed_transcript,protein_coding,retained_intron	10908	PNPLA6	PNPLA6			false	10908	331	0	1	ASSOCIATED_NEW_GENE	0	0.992322	false	0	10908	0		0	[A0A0B4NEY1, A0A0B4NF33, A0A0B4NFD1, A0A0B4NFS2, A0A2R8Y7E1, A0A384DVU0, M0QXH7, M0QYF5, M0QYT1, M0QZD1, M0QZK5, M0R2C2, M0R2H4, M0R2K2, Q8IY17]	10908
			3.5413	0			3.Intra Cellular	3.Intra Cellular	0.282382	1	4	ENSG00000165416	GENE-processed_transcript,protein_coding,retained_intron	10910	SUGT1	SUGT1			false	10910	331	0	1	ASSOCIATED_NEW_GENE	0	0.992322	false	0	10910	0		0	[A8K7W3, B4DYC6, Q9Y2Z0]	10910
			3.54676	0			3.Intra Cellular	3.Intra Cellular	0.281948	1	4	ENSG00000130222	GENE-processed_transcript,protein_coding	10912	GADD45G	GADD45G			false	10912	327	0	1	ASSOCIATED_NEW_GENE	0	0.992306	false	0	10912	0		0	[O95257, Q5MAI3, Q5VZ88, Q6IAW6]	10912
			3.54676	0			3.Intra Cellular	3.Intra Cellular	0.281948	1	4	ENSG00000165672	GENE-protein_coding,retained_intron	10935	PRDX3	PRDX3			false	10935	327	0	1	ASSOCIATED_NEW_GENE	0	0.992306	false	0	10935	0		0	[A0A384MTR2, P30048]	10935
			3.5413	0			1.Extracellular	1.Extracellular, 2.Plasma Membrane, 3.Intra Cellular	0.282382	1	4	ENSG00000110047	GENE-processed_transcript,protein_coding,retained_intron	10938	EHD1	EHD1			false	10938	331	0	1	ASSOCIATED_NEW_GENE	0	0.992322	false	0	10938	0		0	[A0A024R571, B2R5U3, C9IZH1, C9J2Z4, C9JC03, C9JDQ8, C9JIJ3, Q9H4M9]	10938
			3.5413	0			1.Extracellular	1.Extracellular, 5.Nucleus	0.282382	1	4	ENSG00000104356	GENE-protein_coding,retained_intron	10940	POP1	POP1			false	10940	331	0	1	ASSOCIATED_NEW_GENE	0	0.992322	false	0	10940	0		0	[E5RK39, Q96F88, Q99575]	10940
			3.54676	0			3.Intra Cellular	3.Intra Cellular	0.281948	1	4	ENSG00000070718	GENE-nonsense_mediated_decay,processed_transcript,protein_coding,retained_intron	10947	AP3M2	AP3M2			false	10947	327	0	1	ASSOCIATED_NEW_GENE	0	0.992306	false	0	10947	0		0	[A0A1D5RMS9, A0A384NYL6, E5RGF3, E5RI83, E5RJ52, E7ER80, H0YAY4, H0YBA0, H0YBM0, P53677]	10947
			4.06689	0			3.Intra Cellular	3.Intra Cellular	0.245888	1	6	ENSG00000106803	GENE-processed_transcript,protein_coding	10952	SEC61B	SEC61B			false	10952	108	0	1	ASSOCIATED_NEW_GENE	0	0.990734	false	0	10952	0		0	[P60468, S4R3B5]	10952
			3.58362	0			2.Plasma Membrane	2.Plasma Membrane, 3.Intra Cellular	0.279048	1	4	ENSG00000132824	GENE-processed_transcript,protein_coding	10955	SERINC3	SERINC3			false	10955	300	0	1	ASSOCIATED_NEW_GENE	0	0.992195	false	0	10955	0		0	[L8E9G1, L8ECD5, Q13530, Q5H936]	10955
			3.58362	0			1.Extracellular	1.Extracellular, 2.Plasma Membrane, 3.Intra Cellular	0.279048	1	4	ENSG00000169223	GENE-processed_transcript,protein_coding,retained_intron	10960	LMAN2	LMAN2			false	10960	300	0	1	ASSOCIATED_NEW_GENE	0	0.992195	false	0	10960	0		0	[A0A384NPY7, D6RBH1, D6RBV2, D6RDX1, D6RIU4, Q12907]	10960
			4.06689	0			3.Intra Cellular	3.Intra Cellular, 4.Nuclear Membrane	0.245888	1	6	ENSG00000118816	GENE-nonsense_mediated_decay,processed_transcript,protein_coding,retained_intron	10983	CCNI	CCNI			false	10983	108	0	1	ASSOCIATED_NEW_GENE	0	0.990734	false	0	10983	0		0	[A0A024RDH0, D6RDK3, D6REZ3, D6RG12, D6RH01, H0YA27, Q14094, Q6FHH0]	10983
			3.5413	0			3.Intra Cellular	3.Intra Cellular	0.282382	1	4	ENSG00000132305	GENE-nonsense_mediated_decay,processed_transcript,protein_coding,retained_intron	10989	IMMT	IMMT			false	10989	331	0	1	ASSOCIATED_NEW_GENE	0	0.992322	false	0	10989	0		0	[A0A087WYS0, B9A067, C9J406, D6RAW4, H7C463, Q05DN3, Q16891, Q3B7X4]	10989
			3.58362	0			3.Intra Cellular	3.Intra Cellular	0.279048	1	4	ENSG00000105135	GENE-nonsense_mediated_decay,processed_transcript,protein_coding,retained_intron	10994	ILVBL	ILVBL			false	10994	300	0	1	ASSOCIATED_NEW_GENE	0	0.992195	false	0	10994	0		0	[A1L0T0, E9PJS0, E9PL44, E9PNL1, M0QZX5, M0R026, M0R1B5]	10994
			3.58362	0			1.Extracellular	1.Extracellular, 3.Intra Cellular	0.279048	1	4	ENSG00000125868	GENE-nonsense_mediated_decay,protein_coding	11034	DSTN	DSTN			false	11034	300	0	1	ASSOCIATED_NEW_GENE	0	0.992195	false	0	11034	0		0	[F6RFD5, P60981, V9HWA6]	11034
			3.54676	0			5.Nucleus	5.Nucleus	0.281948	1	4	ENSG00000277594	GENE-nonsense_mediated_decay,protein_coding,retained_intron	11056	DDX52	DDX52			false	11056	327	0	1	ASSOCIATED_NEW_GENE	0	0.992306	false	0	11056	0		0	[A0A087WTD6, A0A087X069, A0A087X121, A0A087X1P7, B3KM65, Q9Y2R4]	11056
			3.99317	0			2.Plasma Membrane	2.Plasma Membrane, 3.Intra Cellular	0.250427	1	6	ENSG00000140526	GENE-processed_transcript,protein_coding,retained_intron	11057	ABHD2	ABHD2			false	11057	109	0	1	ASSOCIATED_NEW_GENE	0	0.990957	false	0	11057	0		0	[A0A024RC89, H3BMT2, H3BN19, H3BUZ6, P08910]	11057
			3.58362	0			1.Extracellular	1.Extracellular, 3.Intra Cellular	0.279048	1	4	ENSG00000198373	GENE-nonsense_mediated_decay,processed_transcript,protein_coding,retained_intron	11060	WWP2	WWP2			false	11060	300	0	1	ASSOCIATED_NEW_GENE	0	0.992195	false	0	11060	0		0	[A0A024R711, B4DHF6, H3BPJ8, H3BRX8, H3BS79, O00308]	11060
			3.5413	0			3.Intra Cellular	3.Intra Cellular	0.282382	1	4	ENSG00000171368	GENE-protein_coding	11076	TPPP	TPPP			false	11076	331	0	1	ASSOCIATED_NEW_GENE	0	0.992322	false	0	11076	0		0	[O94811, Q4L233]	11076
			3.99317	0			1.Extracellular	1.Extracellular, 3.Intra Cellular	0.250427	1	6	ENSG00000154736	GENE-nonsense_mediated_decay,protein_coding	11096	ADAMTS5	ADAMTS5			false	11096	109	0	1	ASSOCIATED_NEW_GENE	0	0.990957	false	0	11096	0		0	[A0A494C1E4, Q9UNA0]	11096
			3.5413	0			3.Intra Cellular	3.Intra Cellular, 4.Nuclear Membrane	0.282382	1	4	ENSG00000136243	GENE-nonsense_mediated_decay,processed_transcript,protein_coding,retained_intron	11097	NUP42	NUP42			false	11097	331	0	1	ASSOCIATED_NEW_GENE	0	0.992322	false	0	11097	0		0	[A0A087WZL5, B4DT96, C9JYA1, F8WC66, O15504]	11097
			3.58362	0			3.Intra Cellular	3.Intra Cellular, 5.Nucleus	0.279048	1	4	ENSG00000163684	GENE-processed_transcript,protein_coding,retained_intron	11102	RPP14	RPP14			false	11102	300	0	1	ASSOCIATED_NEW_GENE	0	0.992195	false	0	11102	0		0	[O95059]	11102
			4.07099	0			1.Extracellular	1.Extracellular, 3.Intra Cellular	0.245641	1	6	ENSG00000149554	GENE-nonsense_mediated_decay,protein_coding,retained_intron	1111	CHEK1	CHEK1			false	1111	48	0	1	ASSOCIATED_NEW_GENE	0	0.990722	false	0	1111	0		0	[A0A087WT52, B4DT73, E7EPP6, E9PJI4, E9PKQ3, E9PPA5, E9PQW7, E9PRU7, O14757, Q6W8P8]	1111
			3.5413	0			3.Intra Cellular	3.Intra Cellular	0.282382	1	4	ENSG00000106049	GENE-nonsense_mediated_decay,protein_coding,retained_intron	11112	HIBADH	HIBADH			false	11112	331	0	1	ASSOCIATED_NEW_GENE	0	0.992322	false	0	11112	0		0	[A0A024RA75, F8WET2, H7BZL2, P31937]	11112
			3.5413	0			0.Annotation definition not found in 'Homo Sapiens.properties' file	0.Annotation definition not found in 'Homo Sapiens.properties' file	0.282382	1	4	ENSG00000053254	GENE-nonsense_mediated_decay,processed_transcript,protein_coding	1112	FOXN3	FOXN3			false	1112	331	0	1	ASSOCIATED_NEW_GENE	0	0.992322	false	0	1112	0		0	[A0A024R6I1, G3V3A7, G3V4N5, G3V5C7, H0YJ22, H0YJ43, H0YJ54, H0YJ94, H0YJG3, H0YJY0, O00409]	1112
			3.57406	0			1.Extracellular	1.Extracellular, 2.Plasma Membrane, 3.Intra Cellular	0.279794	1	4	ENSG00000174842	GENE-nonsense_mediated_decay,protein_coding,retained_intron	11146	GLMN	GLMN			false	11146	307	0	1	ASSOCIATED_NEW_GENE	0	0.992223	false	0	11146	0		0	[B4DJ85, M0QX84, M0QXG8, Q92990]	11146
			3.5413	0			3.Intra Cellular	3.Intra Cellular	0.282382	1	4	ENSG00000198855	GENE-processed_transcript,protein_coding	11153	FICD	FICD			false	11153	331	0	1	ASSOCIATED_NEW_GENE	0	0.992322	false	0	11153	0		0	[A0A024RBM8, F8VZ74, H0YIR6, J3KP49, Q9BVA6]	11153
			3.57406	0			3.Intra Cellular	3.Intra Cellular	0.279794	1	4	ENSG00000079974	GENE-nonsense_mediated_decay,processed_transcript,protein_coding,retained_intron	11158	RABL2B	RABL2B			false	11158	307	0	1	ASSOCIATED_NEW_GENE	0	0.992223	false	0	11158	0		0	[A0A0S2SW46, A8MXF6, C9JFZ0, F2Z2T3, F2Z3A9, F2Z3J7, Q9UNT1]	11158
			3.57406	0			0.Annotation definition not found in 'Homo Sapiens.properties' file	0.Annotation definition not found in 'Homo Sapiens.properties' file	0.279794	1	4	ENSG00000144134	GENE-nonsense_mediated_decay,processed_transcript,protein_coding,retained_intron	11159	RABL2A	RABL2A			false	11159	307	0	1	ASSOCIATED_NEW_GENE	0	0.992223	false	0	11159	0		0	[A0AUY0, B7ZBD4, B7ZBD5, E7EWW3, F2Z2E5, Q2TAB6, Q6IC14, Q9UBK7]	11159
			3.5413	0			2.Plasma Membrane	2.Plasma Membrane, 3.Intra Cellular	0.282382	1	4	ENSG00000147475	GENE-processed_transcript,protein_coding,retained_intron	11160	ERLIN2	ERLIN2			false	11160	331	0	1	ASSOCIATED_NEW_GENE	0	0.992322	false	0	11160	0		0	[A0A384ME54, E5RHW4, E5RJ09, O94905]	11160
			3.5413	0			1.Extracellular	1.Extracellular, 3.Intra Cellular	0.282382	1	4	ENSG00000165609	GENE-nonsense_mediated_decay,processed_transcript,protein_coding	11164	NUDT5	NUDT5			false	11164	331	0	1	ASSOCIATED_NEW_GENE	0	0.992322	false	0	11164	0		0	[A6NCQ0, A6NFX8, A6NJU6, C9JYY9, H0YEY4, Q9UKK9]	11164
			4.16655	0			1.Extracellular	1.Extracellular, 3.Intra Cellular	0.240007	1	6	ENSG00000163430	GENE-processed_transcript,protein_coding,retained_intron	11167	FSTL1	FSTL1			false	11167	58	0	1	ASSOCIATED_NEW_GENE	0	0.990433	false	0	11167	0		0	[C9J5G4, H7C4W4, Q12841]	11167
			3.5413	0			3.Intra Cellular	3.Intra Cellular	0.282382	1	4	ENSG00000023734	GENE-nonsense_mediated_decay,protein_coding,retained_intron	11171	STRAP	STRAP			false	11171	331	0	1	ASSOCIATED_NEW_GENE	0	0.992322	false	0	11171	0		0	[B0AZV0, F5H1G1, H0YH33, Q9Y3F4]	11171
			3.54676	0			1.Extracellular	1.Extracellular	0.281948	1	4	ENSG00000156076	GENE-protein_coding	11197	WIF1	WIF1			false	11197	327	0	1	ASSOCIATED_NEW_GENE	0	0.992306	false	0	11197	0		0	[F5H8A3, H0YFK7, Q9Y5W5]	11197
			4.06689	0			0.Annotation definition not found in 'Homo Sapiens.properties' file	0.Annotation definition not found in 'Homo Sapiens.properties' file	0.245888	1	6	ENSG00000092201	GENE-nonsense_mediated_decay,protein_coding,retained_intron	11198	SUPT16H	SUPT16H			false	11198	108	0	1	ASSOCIATED_NEW_GENE	0	0.990734	false	0	11198	0		0	[G3V2X0, G3V401, G3V5A4, Q0VGA3, Q9Y5B9]	11198
			3.58362	0			2.Plasma Membrane	2.Plasma Membrane, 3.Intra Cellular, 5.Nucleus	0.279048	1	4	ENSG00000023516	GENE-protein_coding	11215	AKAP11	AKAP11			false	11215	300	0	1	ASSOCIATED_NEW_GENE	0	0.992195	false	0	11215	0		0	[Q9UKA4]	11215
			4.06689	0			2.Plasma Membrane	2.Plasma Membrane, 3.Intra Cellular	0.245888	1	6	ENSG00000167371	GENE-nonsense_mediated_decay,processed_transcript,protein_coding	112476	PRRT2	PRRT2			false	112476	108	0	1	ASSOCIATED_NEW_GENE	0	0.990734	false	0	112476	0		0	[A0A1B0GTE9, A0A1B0GTP1, A0A1B0GTR2, A0A1B0GTS0, A0A1B0GU25, A0A1B0GU37, A0A1B0GUR0, A0A1B0GUW9, H3BN10, Q7Z6L0]	112476
			3.5413	0			0.Annotation definition not found in 'Homo Sapiens.properties' file	0.Annotation definition not found in 'Homo Sapiens.properties' file	0.282382	1	4	ENSG00000013392	GENE-protein_coding	112611	RWDD2A	RWDD2A			false	112611	331	0	1	ASSOCIATED_NEW_GENE	0	0.992322	false	0	112611	0		0	[B2R7R2, B4DZK9, Q9UIY3]	112611
			3.5413	0			1.Extracellular	1.Extracellular, 3.Intra Cellular	0.282382	1	4	ENSG00000157349	GENE-nonsense_mediated_decay,processed_transcript,protein_coding,retained_intron	11269	DDX19B	DDX19B			false	11269	331	0	1	ASSOCIATED_NEW_GENE	0	0.992322	false	0	11269	0		0	[A0A024QZ90, A0A0U4B4U6, B4DL69, H3BMQ5, H3BMV7, H3BPV3, H3BQK0, H3BTX1, H3BUH0, Q2NL95, Q9UMR2]	11269
			3.54676	0			1.Extracellular	1.Extracellular	0.281948	1	4	ENSG00000111215	GENE-processed_transcript,protein_coding,retained_intron	11272	PRR4	PRR4			false	11272	327	0	1	ASSOCIATED_NEW_GENE	0	0.992306	false	0	11272	0		0	[A0A0A0MT31, A0A0J9YXF8, F5H178, Q16378]	11272
			3.5413	0			3.Intra Cellular	3.Intra Cellular	0.282382	1	4	ENSG00000168488	GENE-nonsense_mediated_decay,processed_transcript,protein_coding,retained_intron	11273	ATXN2L	ATXN2L			false	11273	331	0	1	ASSOCIATED_NEW_GENE	0	0.992322	false	0	11273	0		0	[A0A024QZ91, A0A024QZB7, A0A024QZC0, A0A0C4DGL7, H3BMX1, H3BPQ7, H3BQ14, H3BQX7, H3BRB0, H3BSK9, H3BSQ5, H3BUE3, H3BUF6, Q8WWM7]	11273
			3.58362	0			3.Intra Cellular	3.Intra Cellular	0.279048	1	4	ENSG00000109466	GENE-nonsense_mediated_decay,processed_transcript,protein_coding	11275	KLHL2	KLHL2			false	11275	300	0	1	ASSOCIATED_NEW_GENE	0	0.992195	false	0	11275	0		0	[B4DFZ5, D3DP30, D6R9G5, D6RAP5, D6RGC3, E9PEX9, O95198]	11275
			3.58362	0			3.Intra Cellular	3.Intra Cellular	0.279048	1	4	ENSG00000160877	GENE-protein_coding	112939	NACC1	NACC1			false	112939	300	0	1	ASSOCIATED_NEW_GENE	0	0.992195	false	0	112939	0		0	[A0A024R7E0, K7ELC5, K7ENW4, Q96RE7]	112939
			3.5413	0			3.Intra Cellular	3.Intra Cellular	0.282382	1	4	ENSG00000136631	GENE-nonsense_mediated_decay,processed_transcript,protein_coding,retained_intron	11311	VPS45	VPS45			false	11311	331	0	1	ASSOCIATED_NEW_GENE	0	0.992322	false	0	11311	0		0	[A0A087WU65, A0A1B0GXI6, A0A2R8Y7W9, A0A2R8YD95, A0A2R8YDP1, A0A2R8YE10, A0A2R8YEX8, A0A2R8YF01, B7Z360, B7Z5D4, B7Z7G7, Q5T4Q0, Q9NRW7]	11311
			3.5413	0			3.Intra Cellular	3.Intra Cellular	0.282382	1	4	ENSG00000122882	GENE-nonsense_mediated_decay,processed_transcript,protein_coding	11319	ECD	ECD			false	11319	331	0	1	ASSOCIATED_NEW_GENE	0	0.992322	false	0	11319	0		0	[C9J316, C9JGV1, F2Z2R1, O95905, S4R458]	11319
			3.54676	0			1.Extracellular	1.Extracellular, 2.Plasma Membrane, 3.Intra Cellular	0.281948	1	4	ENSG00000106244	GENE-nonsense_mediated_decay,processed_transcript,protein_coding,retained_intron	11333	PDAP1	PDAP1			false	11333	327	0	1	ASSOCIATED_NEW_GENE	0	0.992306	false	0	11333	0		0	[F8WBW6, Q13442]	11333
			3.5413	0	Transcription Factor Complex		4.Nuclear Membrane	4.Nuclear Membrane	0.282382	1	4	ENSG00000122565	GENE-processed_transcript,protein_coding,retained_intron	11335	CBX3	CBX3			false	11335	331	0	1	ASSOCIATED_NEW_GENE	0	0.992322	false	0	11335	0		0	[A4D177, B8ZZ43, C9JMM0, Q13185, S4R2Y4]	11335
			3.57406	0			3.Intra Cellular	3.Intra Cellular	0.279794	1	4	ENSG00000176087	GENE-protein_coding	113829	SLC35A4	SLC35A4			false	113829	307	0	1	ASSOCIATED_NEW_GENE	0	0.992223	false	0	113829	0		0	[L0R6Q1, Q96G79]	113829
			3.58362	0			0.Annotation definition not found in 'Homo Sapiens.properties' file	0.Annotation definition not found in 'Homo Sapiens.properties' file	0.279048	1	4	ENSG00000197134	GENE-nonsense_mediated_decay,processed_transcript,protein_coding	113835	ZNF257	ZNF257			false	113835	300	0	1	ASSOCIATED_NEW_GENE	0	0.992195	false	0	113835	0		0	[A0A494C0E0, M0QXX9, M0QYA6, M0R0N1, M0R321, Q9Y2Q1]	113835
			3.58362	0			2.Plasma Membrane	2.Plasma Membrane, 3.Intra Cellular	0.279048	1	4	ENSG00000213341	GENE-processed_transcript,protein_coding	1147	CHUK	CHUK			false	1147	300	0	1	ASSOCIATED_NEW_GENE	0	0.992195	false	0	1147	0		0	[O15111, Q562E6]	1147
			3.5413	0			5.Nucleus	5.Nucleus	0.282382	1	4	ENSG00000166987	GENE-nonsense_mediated_decay,processed_transcript,protein_coding,retained_intron	114785	MBD6	MBD6			false	114785	331	0	1	ASSOCIATED_NEW_GENE	0	0.992322	false	0	114785	0		0	[A0A024RBA3, A0A0C4DGJ6, F8VNX1, F8VPC4, F8VU14, F8VVK7, F8VW40, F8VZD7, H0YHD1, H0YHN1, H0YIU1, Q6P0P0, Q96DN6]	114785
			3.54676	0			3.Intra Cellular	3.Intra Cellular	0.281948	1	4	ENSG00000148339	GENE-nonsense_mediated_decay,protein_coding,retained_intron	114789	SLC25A25	SLC25A25			false	114789	327	0	1	ASSOCIATED_NEW_GENE	0	0.992306	false	0	114789	0		0	[A0A804HI56, A0A804HLB0, F8WEY9, H7C4Z4, L0R8F1, Q6KCM7]	114789
			3.58362	0			1.Extracellular	1.Extracellular, 3.Intra Cellular	0.279048	1	4	ENSG00000144589	GENE-nonsense_mediated_decay,processed_transcript,protein_coding,retained_intron	114790	STK11IP	STK11IP			false	114790	300	0	1	ASSOCIATED_NEW_GENE	0	0.992195	false	0	114790	0		0	[E7ERV2, H7C236, H7C2J7, M0QYE5, Q8N1F8]	114790
			3.54676	0			0.Annotation definition not found in 'Homo Sapiens.properties' file	0.Annotation definition not found in 'Homo Sapiens.properties' file	0.281948	1	4	ENSG00000139364	GENE-processed_transcript,protein_coding,retained_intron	114795	TMEM132B	TMEM132B			false	114795	327	0	1	ASSOCIATED_NEW_GENE	0	0.992306	false	0	114795	0		0	[A0A804HK64, Q14DG7]	114795
			3.99317	0			0.Annotation definition not found in 'Homo Sapiens.properties' file	0.Annotation definition not found in 'Homo Sapiens.properties' file	0.250427	1	6	ENSG00000119771	GENE-protein_coding,retained_intron	114818	KLHL29	KLHL29			false	114818	109	0	1	ASSOCIATED_NEW_GENE	0	0.990957	false	0	114818	0		0	[H0Y2P5, Q6NT65, Q96CT2]	114818
			3.99317	0			0.Annotation definition not found in 'Homo Sapiens.properties' file	0.Annotation definition not found in 'Homo Sapiens.properties' file	0.250427	1	6	ENSG00000176209	GENE-nonsense_mediated_decay,processed_transcript,protein_coding	114926	SMIM19	SMIM19			false	114926	109	0	1	ASSOCIATED_NEW_GENE	0	0.990957	false	0	114926	0		0	[E5RII4, E5RKA7, Q96E16]	114926
			3.5413	0			1.Extracellular	1.Extracellular, 2.Plasma Membrane, 3.Intra Cellular	0.282382	1	4	ENSG00000168140	GENE-protein_coding	114990	VASN	VASN			false	114990	331	0	1	ASSOCIATED_NEW_GENE	0	0.992322	false	0	114990	0		0	[Q6EMK4]	114990
			3.57406	0			2.Plasma Membrane	2.Plasma Membrane	0.279794	1	4	ENSG00000162104	GENE-nonsense_mediated_decay,processed_transcript,protein_coding,retained_intron	115	ADCY9	ADCY9			false	115	307	0	1	ASSOCIATED_NEW_GENE	0	0.992223	false	0	115	0		0	[I3L300, I3L342, I3NI20, L0R6C2, O60503]	115
			4.16655	0			3.Intra Cellular	3.Intra Cellular	0.240007	1	6	ENSG00000168300	GENE-processed_transcript,protein_coding,retained_intron	115294	PCMTD1	PCMTD1			false	115294	58	0	1	ASSOCIATED_NEW_GENE	0	0.990433	false	0	115294	0		0	[A0A024R7U8, B7Z927, E5RGG7, F5H1M8, H0YBU4, Q96MG8]	115294
			3.57406	0			0.Annotation definition not found in 'Homo Sapiens.properties' file	0.Annotation definition not found in 'Homo Sapiens.properties' file	0.279794	1	4	ENSG00000116212	GENE-processed_transcript,protein_coding	115353	LRRC42	LRRC42			false	115353	307	0	1	ASSOCIATED_NEW_GENE	0	0.992223	false	0	115353	0		0	[A6NL66, E7EP35, Q9Y546]	115353
			3.5413	0			0.Annotation definition not found in 'Homo Sapiens.properties' file	0.Annotation definition not found in 'Homo Sapiens.properties' file	0.282382	1	4	ENSG00000142459	GENE-processed_transcript,protein_coding,retained_intron	115704	EVI5L	EVI5L			false	115704	331	0	1	ASSOCIATED_NEW_GENE	0	0.992322	false	0	115704	0		0	[A0A384MR55, M0QYX4, M0R1Y1, Q96CN4]	115704
			3.54676	0			2.Plasma Membrane	2.Plasma Membrane, 3.Intra Cellular	0.281948	1	4	ENSG00000176018	GENE-nonsense_mediated_decay,protein_coding	116068	LYSMD3	LYSMD3			false	116068	327	0	1	ASSOCIATED_NEW_GENE	0	0.992306	false	0	116068	0		0	[A8K613, G5E9N8, Q7Z3D4]	116068
			3.57406	0			0.Annotation definition not found in 'Homo Sapiens.properties' file	0.Annotation definition not found in 'Homo Sapiens.properties' file	0.279794	1	4	ENSG00000167625	GENE-protein_coding	116115	ZNF526	ZNF526			false	116115	307	0	1	ASSOCIATED_NEW_GENE	0	0.992223	false	0	116115	0		0	[H9ZYJ3, M0R395, Q8TF50]	116115
			3.54676	0			3.Intra Cellular	3.Intra Cellular	0.281948	1	4	ENSG00000117155	GENE-nonsense_mediated_decay,protein_coding,retained_intron	117178	SSX2IP	SSX2IP			false	117178	327	0	1	ASSOCIATED_NEW_GENE	0	0.992306	false	0	117178	0		0	[B7ZB07, C9JIX7, Q9Y2D8, S4R2Y6, S4R403]	117178
			4.36724	0			5.Nucleus	5.Nucleus	0.228978	1	6	ENSG00000108592	GENE-nonsense_mediated_decay,processed_transcript,protein_coding,retained_intron	117246	FTSJ3	FTSJ3			false	117246	31	0	1	ASSOCIATED_NEW_GENE	0	0.989827	false	0	117246	0		0	[J3KRY4, J3KS36, J3KS74, J3QKT6, J3QR05, J3QRS5, J3QSE2, Q8IY81]	117246
			3.5413	0			1.Extracellular	1.Extracellular, 2.Plasma Membrane, 3.Intra Cellular	0.282382	1	4	ENSG00000161203	GENE-nonsense_mediated_decay,processed_transcript,protein_coding,retained_intron	1173	AP2M1	AP2M1			false	1173	331	0	1	ASSOCIATED_NEW_GENE	0	0.992322	false	0	1173	0		0	[A0A087WY71, B4DNB9, C9JGT8, C9JJ47, C9JJD3, C9JPV8, C9JTK4, E9PFW3, H7C4C3, Q96CW1]	1173
			3.57406	0			2.Plasma Membrane	2.Plasma Membrane, 3.Intra Cellular	0.279794	1	4	ENSG00000106367	GENE-nonsense_mediated_decay,processed_transcript,protein_coding	1174	AP1S1	AP1S1			false	1174	307	0	1	ASSOCIATED_NEW_GENE	0	0.992223	false	0	1174	0		0	[A0A024QYT6, A0A2R8Y7S3, A0A2R8YGH5, H7C1E4, P61966]	1174
			4.06689	0			2.Plasma Membrane	2.Plasma Membrane, 3.Intra Cellular	0.245888	1	6	ENSG00000092871	GENE-nonsense_mediated_decay,processed_transcript,protein_coding	117584	RFFL	RFFL			false	117584	108	0	1	ASSOCIATED_NEW_GENE	0	0.990734	false	0	117584	0		0	[C9JE27, J3KSI3, J3KSU7, J3QR17, Q8WZ73]	117584
			3.57406	0			0.Annotation definition not found in 'Homo Sapiens.properties' file	0.Annotation definition not found in 'Homo Sapiens.properties' file	0.279794	1	4	ENSG00000178338	GENE-processed_transcript,protein_coding	117608	ZNF354B	ZNF354B			false	117608	307	0	1	ASSOCIATED_NEW_GENE	0	0.992223	false	0	117608	0		0	[A0A1S5UZ15, E5RH89, Q96LW1]	117608
			4.36724	0			2.Plasma Membrane	2.Plasma Membrane, 3.Intra Cellular	0.228978	1	6	ENSG00000087274	GENE-nonsense_mediated_decay,processed_transcript,protein_coding,retained_intron	118	ADD1	ADD1			false	118	31	0	1	ASSOCIATED_NEW_GENE	0	0.989827	false	0	118	0		0	[A0A0A0MSR2, A0A804HL01, D6RAH3, D6RF25, D6RJE2, E7ENY0, E7EV99, H0Y9H2, H0YFD8, H0YG19, P35611, Q96D30]	118
			3.54676	0			0.Annotation definition not found in 'Homo Sapiens.properties' file	0.Annotation definition not found in 'Homo Sapiens.properties' file	0.281948	1	4	ENSG00000148690	GENE-processed_transcript,protein_coding	118924	FRA10AC1	FRA10AC1			false	118924	327	0	1	ASSOCIATED_NEW_GENE	0	0.992306	false	0	118924	0		0	[L8E962, Q70Z53]	118924
			3.57406	0			3.Intra Cellular	3.Intra Cellular	0.279794	1	4	ENSG00000165650	GENE-processed_transcript,protein_coding	118987	PDZD8	PDZD8			false	118987	307	0	1	ASSOCIATED_NEW_GENE	0	0.992223	false	0	118987	0		0	[Q8NEN9]	118987
			3.58362	0			2.Plasma Membrane	2.Plasma Membrane, 3.Intra Cellular	0.279048	1	4	ENSG00000148700	GENE-processed_transcript,protein_coding	120	ADD3	ADD3			false	120	300	0	1	ASSOCIATED_NEW_GENE	0	0.992195	false	0	120	0		0	[Q53FL4, Q59EK1, Q5VU08, Q9UEY8]	120
			3.5413	0			2.Plasma Membrane	2.Plasma Membrane, 3.Intra Cellular	0.282382	1	4	ENSG00000175416	GENE-nonsense_mediated_decay,processed_transcript,protein_coding	1212	CLTB	CLTB			false	1212	331	0	1	ASSOCIATED_NEW_GENE	0	0.992322	false	0	1212	0		0	[A0A024R7S3, B4DTF9, D6RJD1, H0Y9Q6, P09497]	1212
			3.57406	0			1.Extracellular	1.Extracellular, 2.Plasma Membrane, 3.Intra Cellular	0.279794	1	4	ENSG00000139263	GENE-nonsense_mediated_decay,protein_coding,retained_intron	121227	LRIG3	LRIG3			false	121227	307	0	1	ASSOCIATED_NEW_GENE	0	0.992223	false	0	121227	0		0	[C9K080, F8VYZ5, H0YID8, Q6UXM1]	121227
			3.5413	0			1.Extracellular	1.Extracellular	0.282382	1	4	ENSG00000197837	GENE-nonsense_mediated_decay,processed_transcript,protein_coding	121504	H4-16	H4-16			false	121504	331	0	1	ASSOCIATED_NEW_GENE	0	0.992322	false	0	121504	0		0	[B2R4R0, P62805]	121504
			4.16655	0			2.Plasma Membrane	2.Plasma Membrane, 3.Intra Cellular	0.240007	1	6	ENSG00000157837	GENE-protein_coding,retained_intron	121665	SPPL3	SPPL3			false	121665	58	0	1	ASSOCIATED_NEW_GENE	0	0.990433	false	0	121665	0		0	[F5H2A2, F5H4L1, F5H4Y6, F5H6I1, F5H7J2, L8EBD6, Q8TCT6, Q9UG23]	121665
			3.5413	0			2.Plasma Membrane	2.Plasma Membrane, 3.Intra Cellular	0.282382	1	4	ENSG00000180008	GENE-processed_transcript,protein_coding	122809	SOCS4	SOCS4			false	122809	331	0	1	ASSOCIATED_NEW_GENE	0	0.992322	false	0	122809	0		0	[Q5H9R6, Q8WXH5]	122809
			3.57406	0			3.Intra Cellular	3.Intra Cellular	0.279794	1	4	ENSG00000139977	GENE-protein_coding	122830	NAA30	NAA30			false	122830	307	0	1	ASSOCIATED_NEW_GENE	0	0.992223	false	0	122830	0		0	[B3KS28, B4DK34, G3V3I2, J3KNC2, Q147X3]	122830
			3.5413	0			0.Annotation definition not found in 'Homo Sapiens.properties' file	0.Annotation definition not found in 'Homo Sapiens.properties' file	0.282382	1	4	ENSG00000168904	GENE-nonsense_mediated_decay,processed_transcript,protein_coding,retained_intron	123355	LRRC28	LRRC28			false	123355	331	0	1	ASSOCIATED_NEW_GENE	0	0.992322	false	0	123355	0		0	[A0A024RC88, B4DEX4, B4DHL3, H0YK92, H0YKF6, H0YKM4, H0YKS9, H0YLR7, H0YM55, H0YM85, H0YNW4, Q86X40, Q8NB41, Q8WUS2]	123355
			3.99317	0			2.Plasma Membrane	2.Plasma Membrane	0.250427	1	6	ENSG00000112486	GENE-protein_coding	1235	CCR6	CCR6			false	1235	109	0	1	ASSOCIATED_NEW_GENE	0	0.990957	false	0	1235	0		0	[P51684]	1235
			4.36724	0			3.Intra Cellular	3.Intra Cellular	0.228978	1	6	ENSG00000186628	GENE-protein_coding	123722	FSD2	FSD2			false	123722	31	0	1	ASSOCIATED_NEW_GENE	0	0.989827	false	0	123722	0		0	[A1L4K1, B7ZM05, H0YLA8]	123722
			3.58362	0			3.Intra Cellular	3.Intra Cellular	0.279048	1	4	ENSG00000166822	GENE-nonsense_mediated_decay,protein_coding	124491	TMEM170A	TMEM170A			false	124491	300	0	1	ASSOCIATED_NEW_GENE	0	0.992195	false	0	124491	0		0	[B3KT46, H3BQT8, H3BRD7, H3BS26, Q8WVE7]	124491
			3.57406	0			3.Intra Cellular	3.Intra Cellular	0.279794	1	4	ENSG00000153944	GENE-nonsense_mediated_decay,processed_transcript,protein_coding,retained_intron	124540	MSI2	MSI2			false	124540	307	0	1	ASSOCIATED_NEW_GENE	0	0.992223	false	0	124540	0		0	[A0A6Q8PF05, A0A6Q8PFI2, A0A6Q8PFU8, A0A6Q8PGD8, A0A6Q8PGF5, A0A6Q8PH26, A0A6Q8PH41, A0A6Q8PH51, A0A6Q8PHP1, A0A6Q8PHT3, B4DHE8, B4DM51, J3KTC1, J3QKT5, Q96DH6]	124540
			4.06689	0			0.Annotation definition not found in 'Homo Sapiens.properties' file	0.Annotation definition not found in 'Homo Sapiens.properties' file	0.245888	1	6	ENSG00000141371	GENE-protein_coding,retained_intron	124773	C17orf64	C17orf64			false	124773	108	0	1	ASSOCIATED_NEW_GENE	0	0.990734	false	0	124773	0		0	[A0A0G2JLI9, K7EQ24, Q86WR6]	124773
			3.5413	0			0.Annotation definition not found in 'Homo Sapiens.properties' file	0.Annotation definition not found in 'Homo Sapiens.properties' file	0.282382	1	4	ENSG00000214941	GENE-nonsense_mediated_decay,processed_transcript,protein_coding	125150	ZSWIM7	ZSWIM7			false	125150	331	0	1	ASSOCIATED_NEW_GENE	0	0.992322	false	0	125150	0		0	[A0A024RD64, J3KRY0, J3QL97, J3QLK2, J3QRT4, J3QS07, J3QS31, Q19AV6]	125150
			4.16655	0			0.Annotation definition not found in 'Homo Sapiens.properties' file	0.Annotation definition not found in 'Homo Sapiens.properties' file	0.240007	1	6	ENSG00000178229	GENE-protein_coding	125919	ZNF543	ZNF543			false	125919	58	0	1	ASSOCIATED_NEW_GENE	0	0.990433	false	0	125919	0		0	[Q08ER8]	125919
			3.54676	0			0.Annotation definition not found in 'Homo Sapiens.properties' file	0.Annotation definition not found in 'Homo Sapiens.properties' file	0.281948	1	4	ENSG00000171295	GENE-protein_coding,retained_intron	126070	ZNF440	ZNF440			false	126070	327	0	1	ASSOCIATED_NEW_GENE	0	0.992306	false	0	126070	0		0	[C9J3D9, C9JG89, C9JV94, K7EJ55, Q05DD3, Q8IYI8]	126070
			3.5413	0			0.Annotation definition not found in 'Homo Sapiens.properties' file	0.Annotation definition not found in 'Homo Sapiens.properties' file	0.282382	1	4	ENSG00000167378	GENE-processed_transcript,protein_coding	126298	IRGQ	IRGQ			false	126298	331	0	1	ASSOCIATED_NEW_GENE	0	0.992322	false	0	126298	0		0	[B7ZMD6, M0QZP8, Q8WZA9]	126298
			3.57406	0			0.Annotation definition not found in 'Homo Sapiens.properties' file	0.Annotation definition not found in 'Homo Sapiens.properties' file	0.279794	1	4	ENSG00000160392	GENE-nonsense_mediated_decay,protein_coding,retained_intron	126526	C19orf47	C19orf47			false	126526	307	0	1	ASSOCIATED_NEW_GENE	0	0.992223	false	0	126526	0		0	[A0A2R8Y6U9, A0A804HLH2, J3QKY6, J3QKZ5, J3QS16, J3QS80, J9JIE4, Q8N9M1]	126526
			3.5413	0			1.Extracellular	1.Extracellular	0.282382	1	4	ENSG00000203811	GENE-protein_coding	126961	H3C14	H3C14			false	126961	331	0	1	ASSOCIATED_NEW_GENE	0	0.992322	false	0	126961	0		0	[Q71DI3]	126961
			4.06689	0			1.Extracellular	1.Extracellular, 3.Intra Cellular	0.245888	1	6	ENSG00000108821	GENE-protein_coding,retained_intron	1277	COL1A1	COL1A1			false	1277	108	0	1	ASSOCIATED_NEW_GENE	0	0.990734	false	0	1277	0		0	[D3DTX7, H9C5C5, I3L3H7, L0R6F3, O00604, P02452, Q16053, Q6LAN8, Q9UE86, Q9UMA6, Q9UNF2, T1RTD8]	1277
			3.57406	0			1.Extracellular	1.Extracellular, 3.Intra Cellular	0.279794	1	4	ENSG00000197894	GENE-nonsense_mediated_decay,processed_transcript,protein_coding,retained_intron	128	ADH5	ADH5			false	128	307	0	1	ASSOCIATED_NEW_GENE	0	0.992223	false	0	128	0		0	[D6R9G2, D6RAY0, D6RFE4, H0YAG8, P11766, Q6FI45, Q6IRT1, Q9H1A0]	128
			3.5413	0			3.Intra Cellular	3.Intra Cellular	0.282382	1	4	ENSG00000196890	GENE-processed_transcript,protein_coding	128312	H2BU1	H2BU1			false	128312	331	0	1	ASSOCIATED_NEW_GENE	0	0.992322	false	0	128312	0		0	[Q8N257]	128312
			4.06689	0			1.Extracellular	1.Extracellular, 3.Intra Cellular	0.245888	1	6	ENSG00000186998	GENE-nonsense_mediated_decay,processed_transcript,protein_coding,retained_intron	129080	EMID1	EMID1			false	129080	108	0	1	ASSOCIATED_NEW_GENE	0	0.990734	false	0	129080	0		0	[B0QYK2, B0QYK3, B0QYK4, B0QYK5, F8WDX7, H0Y6W4, Q96A84]	129080
			3.57406	0			1.Extracellular	1.Extracellular, 3.Intra Cellular	0.279794	1	4	ENSG00000144810	GENE-processed_transcript,protein_coding	1295	COL8A1	COL8A1			false	1295	307	0	1	ASSOCIATED_NEW_GENE	0	0.992223	false	0	1295	0		0	[A0A087WZI0, C9JTN9, P27658]	1295
			4.07235	0			1.Extracellular	1.Extracellular, 3.Intra Cellular	0.245558	1	6	ENSG00000049089	GENE-processed_transcript,protein_coding,retained_intron	1298	COL9A2	COL9A2			false	1298	46	0	1	ASSOCIATED_NEW_GENE	0	0.990718	false	0	1298	0		0	[A0A2R8YFT7, B1AKJ3, D3DPU8, H0Y409, Q14055]	1298
			3.58362	0			1.Extracellular	1.Extracellular, 2.Plasma Membrane, 3.Intra Cellular	0.279048	1	4	ENSG00000152102	GENE-protein_coding	130074	FAM168B	FAM168B			false	130074	300	0	1	ASSOCIATED_NEW_GENE	0	0.992195	false	0	130074	0		0	[A0A024QZ31, A1KXE4]	130074
			3.58362	0			3.Intra Cellular	3.Intra Cellular	0.279048	1	4	ENSG00000144357	GENE-nonsense_mediated_decay,processed_transcript,protein_coding,retained_intron	130507	UBR3	UBR3			false	130507	300	0	1	ASSOCIATED_NEW_GENE	0	0.992195	false	0	130507	0		0	[F8WEB7, H0Y3K2, H7BZD8, H7C481, Q6ZT12]	130507
			3.54676	0			1.Extracellular	1.Extracellular, 3.Intra Cellular	0.281948	1	4	ENSG00000084636	GENE-processed_transcript,protein_coding,retained_intron	1307	COL16A1	COL16A1			false	1307	327	0	1	ASSOCIATED_NEW_GENE	0	0.992306	false	0	1307	0		0	[A6NCT7, H7BY97, H7BZL8, H7C3F0, Q07092]	1307
			3.57406	0			0.Annotation definition not found in 'Homo Sapiens.properties' file	0.Annotation definition not found in 'Homo Sapiens.properties' file	0.279794	1	4	ENSG00000185112	GENE-protein_coding	131583	FAM43A	FAM43A			false	131583	307	0	1	ASSOCIATED_NEW_GENE	0	0.992223	false	0	131583	0		0	[Q8N2R8]	131583
			3.54676	0			3.Intra Cellular	3.Intra Cellular, 5.Nucleus	0.281948	1	4	ENSG00000067082	GENE-processed_transcript,protein_coding	1316	KLF6	KLF6			false	1316	327	0	1	ASSOCIATED_NEW_GENE	0	0.992306	false	0	1316	0		0	[D3GC14, Q99612]	1316
			3.99317	0			1.Extracellular	1.Extracellular, 3.Intra Cellular	0.250427	1	6	ENSG00000148926	GENE-protein_coding	133	ADM	ADM			false	133	109	0	1	ASSOCIATED_NEW_GENE	0	0.990957	false	0	133	0		0	[E9PL83, E9PML4, E9PQE6, E9PQT2, P35318]	133
			3.58362	0			3.Intra Cellular	3.Intra Cellular	0.279048	1	4	ENSG00000155846	GENE-processed_transcript,protein_coding,retained_intron	133522	PPARGC1B	PPARGC1B			false	133522	300	0	1	ASSOCIATED_NEW_GENE	0	0.992195	false	0	133522	0		0	[B7ZM40, H0Y713, Q86YN6, Q8TAL0]	133522
			3.54676	0			3.Intra Cellular	3.Intra Cellular	0.281948	1	4	ENSG00000145626	GENE-nonsense_mediated_decay,processed_transcript,protein_coding	133688	UGT3A1	UGT3A1			false	133688	327	0	1	ASSOCIATED_NEW_GENE	0	0.992306	false	0	133688	0		0	[A0A024R085, A8K444, B7Z3N0, B7Z8Q8, D6RHV6, E9PD17, Q6NUS8]	133688
			3.57406	0			3.Intra Cellular	3.Intra Cellular	0.279794	1	4	ENSG00000126267	GENE-protein_coding	1340	COX6B1	COX6B1			false	1340	307	0	1	ASSOCIATED_NEW_GENE	0	0.992223	false	0	1340	0		0	[A0A494C160, K7EQD3, P14854]	1340
			3.58362	0			3.Intra Cellular	3.Intra Cellular, 5.Nucleus	0.279048	1	4	ENSG00000168724	GENE-nonsense_mediated_decay,processed_transcript,protein_coding,retained_intron	134218	DNAJC21	DNAJC21			false	134218	300	0	1	ASSOCIATED_NEW_GENE	0	0.992195	false	0	134218	0		0	[A0A2R8Y4N5, A0A2R8Y4Q0, A0A2R8Y534, A0A2R8YET8, Q5F1R6]	134218
			3.57406	0			3.Intra Cellular	3.Intra Cellular	0.279794	1	4	ENSG00000164284	GENE-processed_transcript,protein_coding	134266	GRPEL2	GRPEL2			false	134266	307	0	1	ASSOCIATED_NEW_GENE	0	0.992223	false	0	134266	0		0	[D6RGI6, Q8TAA5]	134266
			3.54676	0			1.Extracellular	1.Extracellular, 3.Intra Cellular	0.281948	1	4	ENSG00000172497	GENE-processed_transcript,protein_coding,retained_intron	134526	ACOT12	ACOT12			false	134526	327	0	1	ASSOCIATED_NEW_GENE	0	0.992306	false	0	134526	0		0	[Q8WYK0]	134526
			3.54676	0			3.Intra Cellular	3.Intra Cellular	0.281948	1	4	ENSG00000146243	GENE-nonsense_mediated_decay,protein_coding	134728	IRAK1BP1	IRAK1BP1			false	134728	327	0	1	ASSOCIATED_NEW_GENE	0	0.992306	false	0	134728	0		0	[Q5VVH5, U3KQ00, U3KQ34, U3KQ57]	134728
			3.54676	0			0.Annotation definition not found in 'Homo Sapiens.properties' file	0.Annotation definition not found in 'Homo Sapiens.properties' file	0.281948	1	4	ENSG00000111912	GENE-processed_transcript,protein_coding	135112	NCOA7	NCOA7			false	135112	327	0	1	ASSOCIATED_NEW_GENE	0	0.992306	false	0	135112	0		0	[B3KXK4, H0UI55, H0Y5F6, H0Y6T0, Q5TF96, Q5TF97, Q5TF98, Q6PK00, Q8N3C8, Q8N4U9, Q8NI08]	135112
			3.57406	0			3.Intra Cellular	3.Intra Cellular	0.279794	1	4	ENSG00000146281	GENE-protein_coding	135293	PM20D2	PM20D2			false	135293	307	0	1	ASSOCIATED_NEW_GENE	0	0.992223	false	0	135293	0		0	[Q8IYS1]	135293
			3.54676	0			1.Extracellular	1.Extracellular, 2.Plasma Membrane, 3.Intra Cellular	0.281948	1	4	ENSG00000080819	GENE-nonsense_mediated_decay,protein_coding,retained_intron	1371	CPOX	CPOX			false	1371	327	0	1	ASSOCIATED_NEW_GENE	0	0.992306	false	0	1371	0		0	[D6RER6, P36551]	1371
			3.5413	0			3.Intra Cellular	3.Intra Cellular, 5.Nucleus	0.282382	1	4	ENSG00000157184	GENE-nonsense_mediated_decay,protein_coding,retained_intron	1376	CPT2	CPT2			false	1376	331	0	1	ASSOCIATED_NEW_GENE	0	0.992322	false	0	1376	0		0	[A0A140VK13, A0A1B0GTB8, A0A1B0GTL9, A0A1B0GTM0, A0A1B0GUB8, A0A1B0GUD9, A0A1B0GV75, A0A1B0GVF3, A0A1B0GWC0, P23786]	1376
			3.58362	0			0.Annotation definition not found in 'Homo Sapiens.properties' file	0.Annotation definition not found in 'Homo Sapiens.properties' file	0.279048	1	4	ENSG00000189299	GENE-protein_coding	139628	FOXR2	FOXR2			false	139628	300	0	1	ASSOCIATED_NEW_GENE	0	0.992195	false	0	139628	0		0	[Q6PJQ5]	139628
			3.99317	0			1.Extracellular	1.Extracellular, 2.Plasma Membrane, 3.Intra Cellular	0.250427	1	6	ENSG00000167193	GENE-processed_transcript,protein_coding	1398	CRK	CRK			false	1398	109	0	1	ASSOCIATED_NEW_GENE	0	0.990957	false	0	1398	0		0	[A0A0S2Z3K9, A0A0S2Z3Q4, I3L297, L7RT18, P46108]	1398
			3.58362	0			2.Plasma Membrane	2.Plasma Membrane, 3.Intra Cellular	0.279048	1	4	ENSG00000099942	GENE-nonsense_mediated_decay,protein_coding	1399	CRKL	CRKL			false	1399	300	0	1	ASSOCIATED_NEW_GENE	0	0.992195	false	0	1399	0		0	[L8E7R7, P46109]	1399
			3.58362	0			1.Extracellular	1.Extracellular	0.279048	1	4	ENSG00000145681	GENE-protein_coding	1404	HAPLN1	HAPLN1			false	1404	300	0	1	ASSOCIATED_NEW_GENE	0	0.992195	false	0	1404	0		0	[A0A024RAK9, D6RAK7, D6RBS1, D6RBX9, D6RC59, D6RFI7, D6RG04, P10915]	1404
			4.06689	0			0.Annotation definition not found in 'Homo Sapiens.properties' file	0.Annotation definition not found in 'Homo Sapiens.properties' file	0.245888	1	6	ENSG00000196867	GENE-nonsense_mediated_decay,processed_transcript,protein_coding,retained_intron	140612	ZFP28	ZFP28			false	140612	108	0	1	ASSOCIATED_NEW_GENE	0	0.990734	false	0	140612	0		0	[A0JNV5, K7EL00, Q8NHY6, Q9UQD2]	140612
			3.57406	0			3.Intra Cellular	3.Intra Cellular	0.279794	1	4	ENSG00000184992	GENE-protein_coding	140707	BRI3BP	BRI3BP			false	140707	307	0	1	ASSOCIATED_NEW_GENE	0	0.992223	false	0	140707	0		0	[A0A5F9ZHY7, Q8WY22]	140707
			3.57406	0			1.Extracellular	1.Extracellular, 3.Intra Cellular	0.279794	1	4	ENSG00000121671	GENE-processed_transcript,protein_coding,retained_intron	1408	CRY2	CRY2			false	1408	307	0	1	ASSOCIATED_NEW_GENE	0	0.992223	false	0	1408	0		0	[A0A0D2X7Z3, A2I2P1, L8E920, Q49AN0]	1408
			3.57406	0			0.Annotation definition not found in 'Homo Sapiens.properties' file	0.Annotation definition not found in 'Homo Sapiens.properties' file	0.279794	1	4	ENSG00000275004	GENE-nonsense_mediated_decay,protein_coding	140883	ZNF280B	ZNF280B			false	140883	307	0	1	ASSOCIATED_NEW_GENE	0	0.992223	false	0	140883	0		0	[A0A0D9SEJ8, B3KUN2, Q86YH2]	140883
			3.57406	0			0.Annotation definition not found in 'Homo Sapiens.properties' file	0.Annotation definition not found in 'Homo Sapiens.properties' file	0.279794	1	4	ENSG00000153914	GENE-nonsense_mediated_decay,processed_transcript,protein_coding,retained_intron	140890	SREK1	SREK1			false	140890	307	0	1	ASSOCIATED_NEW_GENE	0	0.992223	false	0	140890	0		0	[A0A087WY03, E5RFV3, E5RJ76, E5RK30, H0YC47, Q8WXA9]	140890
			3.5413	0			3.Intra Cellular	3.Intra Cellular	0.282382	1	4	ENSG00000160202	GENE-processed_transcript,protein_coding,retained_intron	1409	CRYAA	CRYAA			false	1409	331	0	1	ASSOCIATED_NEW_GENE	0	0.992322	false	0	1409	0		0	[A0A140G952, A0A140G954, A0A140G955, A0A8C8KJZ9, E7EWH7, P02489, Q71V83]	1409
			3.99317	0			3.Intra Cellular	3.Intra Cellular	0.250427	1	6	ENSG00000162999	GENE-processed_transcript,protein_coding	142679	DUSP19	DUSP19			false	142679	109	0	1	ASSOCIATED_NEW_GENE	0	0.990957	false	0	142679	0		0	[Q8WTR2]	142679
			3.5413	0			1.Extracellular	1.Extracellular, 3.Intra Cellular	0.282382	1	4	ENSG00000124207	GENE-processed_transcript,protein_coding	1434	CSE1L	CSE1L			false	1434	331	0	1	ASSOCIATED_NEW_GENE	0	0.992322	false	0	1434	0		0	[A0A384NKW7, P55060]	1434
			3.99317	0			2.Plasma Membrane	2.Plasma Membrane, 3.Intra Cellular	0.250427	1	6	ENSG00000170743	GENE-nonsense_mediated_decay,protein_coding	143425	SYT9	SYT9			false	143425	109	0	1	ASSOCIATED_NEW_GENE	0	0.990957	false	0	143425	0		0	[B3KNT7, E9PDN4, L8ECP0, Q86SS6, Q8NCP8]	143425
			3.5413	0			2.Plasma Membrane	2.Plasma Membrane	0.282382	1	4	ENSG00000182578	GENE-nonsense_mediated_decay,processed_transcript,protein_coding,retained_intron	1436	CSF1R	CSF1R			false	1436	331	0	1	ASSOCIATED_NEW_GENE	0	0.992322	false	0	1436	0		0	[A2VDG3, D6RGW1, E9PEK4, H0YAL5, P07333, Q14085]	1436
			4.06689	0			3.Intra Cellular	3.Intra Cellular	0.245888	1	6	ENSG00000149212	GENE-processed_transcript,protein_coding	143686	SESN3	SESN3			false	143686	108	0	1	ASSOCIATED_NEW_GENE	0	0.990734	false	0	143686	0		0	[A0A0U1RR17, F5H1K7, P58005]	143686
			3.54676	0			0.Annotation definition not found in 'Homo Sapiens.properties' file	0.Annotation definition not found in 'Homo Sapiens.properties' file	0.281948	1	4	ENSG00000182359	GENE-protein_coding,retained_intron	143879	KBTBD3	KBTBD3			false	143879	327	0	1	ASSOCIATED_NEW_GENE	0	0.992306	false	0	143879	0		0	[A0A024R3B5, A8K1K0, E9PKJ3, G3V161, Q3B7C0, Q8NAB2, U3KQF6]	143879
			3.58362	0			5.Nucleus	5.Nucleus	0.279048	1	4	ENSG00000179119	GENE-processed_transcript,protein_coding,retained_intron	144108	SPTY2D1	SPTY2D1			false	144108	300	0	1	ASSOCIATED_NEW_GENE	0	0.992195	false	0	144108	0		0	[Q68D10]	144108
			3.5413	0			2.Plasma Membrane	2.Plasma Membrane	0.282382	1	4	ENSG00000173262	GENE-nonsense_mediated_decay,processed_transcript,protein_coding,retained_intron	144195	SLC2A14	SLC2A14			false	144195	331	0	1	ASSOCIATED_NEW_GENE	0	0.992322	false	0	144195	0		0	[F5GXP7, F5GXP8, F5GXT4, F5H076, F5H3J0, F5H565, F5H5Q3, F5H5V7, F5H6F6, F5H7N2, Q8TDB8]	144195
			3.54676	0			0.Annotation definition not found in 'Homo Sapiens.properties' file	0.Annotation definition not found in 'Homo Sapiens.properties' file	0.281948	1	4	ENSG00000179195	GENE-processed_transcript,protein_coding,retained_intron	144348	ZNF664	ZNF664			false	144348	327	0	1	ASSOCIATED_NEW_GENE	0	0.992306	false	0	144348	0		0	[A0A024RBR7, A0A024RBR8, Q0P6D9, Q8N3J9]	144348
			3.54676	0			3.Intra Cellular	3.Intra Cellular	0.281948	1	4	ENSG00000113712	GENE-nonsense_mediated_decay,processed_transcript,protein_coding	1452	CSNK1A1	CSNK1A1			false	1452	327	0	1	ASSOCIATED_NEW_GENE	0	0.992306	false	0	1452	0		0	[A0A590UJ43, A0A590UJQ7, A0A590UK94, A0A5F9W493, B4DER9, D6REM4, D6RGE5, E5RG27, E7ETM0, H0Y9X2, P48729, Q05DL3, Q6PJ06, U3KPX3, U3KQ83, U3KQK7]	1452
			3.5413	0			2.Plasma Membrane	2.Plasma Membrane, 3.Intra Cellular	0.282382	1	4	ENSG00000140326	GENE-nonsense_mediated_decay,protein_coding,retained_intron	146059	CDAN1	CDAN1			false	146059	331	0	1	ASSOCIATED_NEW_GENE	0	0.992322	false	0	146059	0		0	[A0A2R8Y5C2, H3BM60, H3BPZ6, Q8IWY9]	146059
			3.54676	0			0.Annotation definition not found in 'Homo Sapiens.properties' file	0.Annotation definition not found in 'Homo Sapiens.properties' file	0.281948	1	4	ENSG00000167981	GENE-protein_coding	146434	ZNF597	ZNF597			false	146434	327	0	1	ASSOCIATED_NEW_GENE	0	0.992306	false	0	146434	0		0	[Q96LX8]	146434
			4.36724	0			3.Intra Cellular	3.Intra Cellular	0.228978	1	6	ENSG00000244045	GENE-nonsense_mediated_decay,processed_transcript,protein_coding,retained_intron	147007	TMEM199	TMEM199			false	147007	31	0	1	ASSOCIATED_NEW_GENE	0	0.989827	false	0	147007	0		0	[J3KRW7, J3KS81, K7EJL8, Q8N511]	147007
			3.54676	0			1.Extracellular	1.Extracellular, 3.Intra Cellular	0.281948	1	4	ENSG00000170367	GENE-protein_coding	1473	CST5	CST5			false	1473	327	0	1	ASSOCIATED_NEW_GENE	0	0.992306	false	0	1473	0		0	[P28325]	1473
			3.57406	0			0.Annotation definition not found in 'Homo Sapiens.properties' file	0.Annotation definition not found in 'Homo Sapiens.properties' file	0.279794	1	4	ENSG00000173480	GENE-protein_coding	147687	ZNF417	ZNF417			false	147687	307	0	1	ASSOCIATED_NEW_GENE	0	0.992223	false	0	147687	0		0	[M0QXH9, M0R0M6, M0R0V5, M0R178, M0R230, M0R267, Q8TAU3]	147687
			4.16655	0			1.Extracellular	1.Extracellular	0.240007	1	6	ENSG00000160161	GENE-processed_transcript,protein_coding	148113	CILP2	CILP2			false	148113	58	0	1	ASSOCIATED_NEW_GENE	0	0.990433	false	0	148113	0		0	[K7EPJ4, Q8IUL8]	148113
			3.54676	0			0.Annotation definition not found in 'Homo Sapiens.properties' file	0.Annotation definition not found in 'Homo Sapiens.properties' file	0.281948	1	4	ENSG00000167785	GENE-processed_transcript,protein_coding,retained_intron	148156	ZNF558	ZNF558			false	148156	327	0	1	ASSOCIATED_NEW_GENE	0	0.992306	false	0	148156	0		0	[Q96NG5]	148156
			3.57406	0			0.Annotation definition not found in 'Homo Sapiens.properties' file	0.Annotation definition not found in 'Homo Sapiens.properties' file	0.279794	1	4	ENSG00000172687	GENE-nonsense_mediated_decay,protein_coding	148203	ZNF738	ZNF738			false	148203	307	0	1	ASSOCIATED_NEW_GENE	0	0.992223	false	0	148203	0		0	[A0A804HJ59, E9PE46, M0R024, M0R0N2, M0R3I0, Q8NE65]	148203
			3.54676	0			2.Plasma Membrane	2.Plasma Membrane	0.281948	1	4	ENSG00000163357	GENE-nonsense_mediated_decay,protein_coding,retained_intron	149095	DCST1	DCST1			false	149095	327	0	1	ASSOCIATED_NEW_GENE	0	0.992306	false	0	149095	0		0	[B4DXB8, B4DXE3, E9PJX3, Q5T197]	149095
			4.16655	0			0.Annotation definition not found in 'Homo Sapiens.properties' file	0.Annotation definition not found in 'Homo Sapiens.properties' file	0.240007	1	6	ENSG00000175087	GENE-protein_coding	149420	PDIK1L	PDIK1L			false	149420	58	0	1	ASSOCIATED_NEW_GENE	0	0.990433	false	0	149420	0		0	[Q8N165, X6RHF8]	149420
			3.57406	0			2.Plasma Membrane	2.Plasma Membrane, 3.Intra Cellular	0.279794	1	4	ENSG00000253313	GENE-protein_coding	149466	C1orf210	C1orf210			false	149466	307	0	1	ASSOCIATED_NEW_GENE	0	0.992223	false	0	149466	0		0	[Q8IVY1]	149466
			3.54676	0			3.Intra Cellular	3.Intra Cellular	0.281948	1	4	ENSG00000168159	GENE-processed_transcript,protein_coding	149603	RNF187	RNF187			false	149603	327	0	1	ASSOCIATED_NEW_GENE	0	0.992306	false	0	149603	0		0	[A0A1X7SBW3, Q5TA31, Q9BVY4]	149603
			3.5413	0	Transcription Factor Complex		1.Extracellular	1.Extracellular, 2.Plasma Membrane, 3.Intra Cellular	0.282382	1	4	ENSG00000168036	GENE-nonsense_mediated_decay,processed_transcript,protein_coding,retained_intron	1499	CTNNB1	CTNNB1			false	1499	331	0	1	ASSOCIATED_NEW_GENE	0	0.992322	false	0	1499	0		0	[A0A024R2Q3, A0A2R8Y543, A0A2R8Y5A3, A0A2R8Y5C3, A0A2R8Y5Z1, A0A2R8Y6G0, A0A2R8Y750, A0A2R8Y7Z0, A0A2R8Y804, A0A2R8Y815, A0A2R8YCH5, A0A2R8YG06, B4DGU4, B5BU28, C9IZ65, G9GAG7, P35222]	1499
			3.57406	0			3.Intra Cellular	3.Intra Cellular	0.279794	1	4	ENSG00000171793	GENE-nonsense_mediated_decay,processed_transcript,protein_coding,retained_intron	1503	CTPS1	CTPS1			false	1503	307	0	1	ASSOCIATED_NEW_GENE	0	0.992223	false	0	1503	0		0	[A0A3B3IRI2, A0A3B3IRQ8, A0A3B3ISY3, A0A3B3ITB8, A0A3B3ITF6, A0A3B3ITH9, B4E1E0, P17812]	1503
			4.06689	0			2.Plasma Membrane	2.Plasma Membrane, 3.Intra Cellular	0.245888	1	6	ENSG00000235568	GENE-nonsense_mediated_decay,protein_coding	150372	NFAM1	NFAM1			false	150372	108	0	1	ASSOCIATED_NEW_GENE	0	0.990734	false	0	150372	0		0	[F8WE95, Q8NET5]	150372
			3.54676	0			4.Nuclear Membrane	4.Nuclear Membrane	0.281948	1	4	ENSG00000177917	GENE-nonsense_mediated_decay,processed_transcript,protein_coding,retained_intron	151188	ARL6IP6	ARL6IP6			false	151188	327	0	1	ASSOCIATED_NEW_GENE	0	0.992306	false	0	151188	0		0	[B3KMZ5, H7C0H7, H7C192, Q8N6S5]	151188
			3.57406	0			3.Intra Cellular	3.Intra Cellular	0.279794	1	4	ENSG00000163840	GENE-protein_coding	151636	DTX3L	DTX3L			false	151636	307	0	1	ASSOCIATED_NEW_GENE	0	0.992223	false	0	151636	0		0	[Q8TDB6]	151636
			4.07235	0			3.Intra Cellular	3.Intra Cellular	0.245558	1	6	ENSG00000129810	GENE-nonsense_mediated_decay,processed_transcript,protein_coding	151648	SGO1	SGO1			false	151648	46	0	1	ASSOCIATED_NEW_GENE	0	0.990718	false	0	151648	0		0	[A0A024R2J4, B5BUA4, F8WB17, Q5FBB7]	151648
			3.58362	0			2.Plasma Membrane	2.Plasma Membrane	0.279048	1	4	ENSG00000186265	GENE-processed_transcript,protein_coding,retained_intron	151888	BTLA	BTLA			false	151888	300	0	1	ASSOCIATED_NEW_GENE	0	0.992195	false	0	151888	0		0	[L8EAT9, Q400G7, Q7Z6A9]	151888
			3.58362	0			0.Annotation definition not found in 'Homo Sapiens.properties' file	0.Annotation definition not found in 'Homo Sapiens.properties' file	0.279048	1	4	ENSG00000137075	GENE-processed_transcript,protein_coding	152006	RNF38	RNF38			false	152006	300	0	1	ASSOCIATED_NEW_GENE	0	0.992195	false	0	152006	0		0	[Q9H0F5]	152006
			4.36724	0			3.Intra Cellular	3.Intra Cellular	0.228978	1	6	ENSG00000166347	GENE-processed_transcript,protein_coding,retained_intron	1528	CYB5A	CYB5A			false	1528	31	0	1	ASSOCIATED_NEW_GENE	0	0.989827	false	0	1528	0		0	[A0A384ME44, J3KNC7, P00167]	1528
			3.5413	0			2.Plasma Membrane	2.Plasma Membrane	0.282382	1	4	ENSG00000134962	GENE-protein_coding	152831	KLB	KLB			false	152831	331	0	1	ASSOCIATED_NEW_GENE	0	0.992322	false	0	152831	0		0	[B4DYH5, B7ZL50, Q49AQ7, Q86Z14]	152831
			3.57406	0			3.Intra Cellular	3.Intra Cellular	0.279794	1	4	ENSG00000168944	GENE-nonsense_mediated_decay,processed_transcript,protein_coding,retained_intron	153241	CEP120	CEP120			false	153241	307	0	1	ASSOCIATED_NEW_GENE	0	0.992223	false	0	153241	0		0	[A0A6Q8PF64, A0A6Q8PF83, A0A6Q8PFG1, A0A6Q8PG38, A0A6Q8PG66, A0A6Q8PGD1, A0A6Q8PH95, A0A6Q8PHT7, B4DLH5, D6R8Z4, D6REX9, Q8N960]	153241
			3.5413	0			3.Intra Cellular	3.Intra Cellular	0.282382	1	4	ENSG00000174695	GENE-processed_transcript,protein_coding,retained_intron	153339	TMEM167A	TMEM167A			false	153339	331	0	1	ASSOCIATED_NEW_GENE	0	0.992322	false	0	153339	0		0	[Q8TBQ9]	153339
			3.5413	0			2.Plasma Membrane	2.Plasma Membrane, 3.Intra Cellular	0.282382	1	4	ENSG00000165168	GENE-nonsense_mediated_decay,processed_transcript,protein_coding	1536	CYBB	CYBB			false	1536	331	0	1	ASSOCIATED_NEW_GENE	0	0.992322	false	0	1536	0		0	[A0A0S2Z3S6, A0A0S2Z4A9, A0A8G0YK02, A0A8G0YK19, G8Z8Y8, P04839, V9GZH6, V9GZN7]	1536
			3.99317	0			1.Extracellular	1.Extracellular, 3.Intra Cellular	0.250427	1	6	ENSG00000164291	GENE-nonsense_mediated_decay,protein_coding	153642	ARSK	ARSK			false	153642	109	0	1	ASSOCIATED_NEW_GENE	0	0.990957	false	0	153642	0		0	[D6R9F9, D6RBR4, E9PGI0, H0Y9F6, Q6UWY0, Q86W75]	153642
			3.99317	0			3.Intra Cellular	3.Intra Cellular	0.250427	1	6	ENSG00000186314	GENE-processed_transcript,protein_coding,retained_intron	153768	PRELID2	PRELID2			false	153768	109	0	1	ASSOCIATED_NEW_GENE	0	0.990957	false	0	153768	0		0	[D6RAB6, Q8N945]	153768
			4.07235	0			3.Intra Cellular	3.Intra Cellular	0.245558	1	6	ENSG00000138061	GENE-processed_transcript,protein_coding	1545	CYP1B1	CYP1B1			false	1545	46	0	1	ASSOCIATED_NEW_GENE	0	0.990718	false	0	1545	0		0	[A0A087WUQ7, A0A087WW26, A0A2R4CIF1, C1KDE6, C1KDE7, C1KDE8, D0EZN5, D0EZN6, D0EZN7, D0EZN8, Q16678, Q2EN00, Q2HZ43, Q4U3K8, Q53TK1]	1545
			3.99317	0			2.Plasma Membrane	2.Plasma Membrane, 3.Intra Cellular	0.250427	1	6	ENSG00000126016	GENE-processed_transcript,protein_coding	154796	AMOT	AMOT			false	154796	109	0	1	ASSOCIATED_NEW_GENE	0	0.990957	false	0	154796	0		0	[A2BDD9, A6NP16, E7ERM3, Q4VCS5]	154796
			3.58362	0			2.Plasma Membrane	2.Plasma Membrane, 3.Intra Cellular	0.279048	1	4	ENSG00000166025	GENE-processed_transcript,protein_coding,retained_intron	154810	AMOTL1	AMOTL1			false	154810	300	0	1	ASSOCIATED_NEW_GENE	0	0.992195	false	0	154810	0		0	[A0A024R3A6, F8WDH4, Q8IY63]	154810
			3.57406	0			3.Intra Cellular	3.Intra Cellular	0.279794	1	4	ENSG00000181220	GENE-protein_coding,retained_intron	155061	ZNF746	ZNF746			false	155061	307	0	1	ASSOCIATED_NEW_GENE	0	0.992223	false	0	155061	0		0	[A0A2R8YDQ5, C9JNZ9, Q6NUN9]	155061
			3.5413	0			1.Extracellular	1.Extracellular, 3.Intra Cellular	0.282382	1	4	ENSG00000176428	GENE-protein_coding	155382	VPS37D	VPS37D			false	155382	331	0	1	ASSOCIATED_NEW_GENE	0	0.992322	false	0	155382	0		0	[C9JYT9, Q86XT2]	155382
			3.5413	0			0.Annotation definition not found in 'Homo Sapiens.properties' file	0.Annotation definition not found in 'Homo Sapiens.properties' file	0.282382	1	4	ENSG00000184863	GENE-nonsense_mediated_decay,processed_transcript,protein_coding	155435	RBM33	RBM33			false	155435	331	0	1	ASSOCIATED_NEW_GENE	0	0.992322	false	0	155435	0		0	[A0A0C4DFS3, A8MTF7, C9J7M3, H0Y3K3, H0Y3K4, H7BXM6, H7C0H2, Q96EV2]	155435
			3.54676	0			2.Plasma Membrane	2.Plasma Membrane, 3.Intra Cellular	0.281948	1	4	ENSG00000173020	GENE-processed_transcript,protein_coding,retained_intron	156	GRK2	GRK2			false	156	327	0	1	ASSOCIATED_NEW_GENE	0	0.992306	false	0	156	0		0	[A0A0S2Z392, E9PRV7, P25098]	156
			3.57406	0			0.Annotation definition not found in 'Homo Sapiens.properties' file	0.Annotation definition not found in 'Homo Sapiens.properties' file	0.279794	1	4	ENSG00000186106	GENE-processed_transcript,protein_coding	157567	ANKRD46	ANKRD46			false	157567	307	0	1	ASSOCIATED_NEW_GENE	0	0.992223	false	0	157567	0		0	[A0A024R9E1, A0A024R9G2, B3KT99, E5RFM7, E5RHV2, E5RI04, E5RI20, J3KP26, Q86W74]	157567
			3.58362	0			3.Intra Cellular	3.Intra Cellular	0.279048	1	4	ENSG00000176853	GENE-nonsense_mediated_decay,protein_coding,retained_intron	157769	FAM91A1	FAM91A1			false	157769	300	0	1	ASSOCIATED_NEW_GENE	0	0.992195	false	0	157769	0		0	[B4DUD8, E7ER68, G3V120, H0YBR6, H0YC80, Q658Y4, Q8N6F3]	157769
			3.54676	0			3.Intra Cellular	3.Intra Cellular	0.281948	1	4	ENSG00000102383	GENE-processed_transcript,protein_coding	158866	ZDHHC15	ZDHHC15			false	158866	327	0	1	ASSOCIATED_NEW_GENE	0	0.992306	false	0	158866	0		0	[B3KY34, Q96MV8]	158866
			3.5413	0			3.Intra Cellular	3.Intra Cellular	0.282382	1	4	ENSG00000001630	GENE-protein_coding,retained_intron	1595	CYP51A1	CYP51A1			false	1595	331	0	1	ASSOCIATED_NEW_GENE	0	0.992322	false	0	1595	0		0	[H7C0D0, Q05D40, Q16850]	1595
			4.16655	0			1.Extracellular	1.Extracellular, 2.Plasma Membrane	0.240007	1	6	ENSG00000148942	GENE-nonsense_mediated_decay,protein_coding,retained_intron	159963	SLC5A12	SLC5A12			false	159963	58	0	1	ASSOCIATED_NEW_GENE	0	0.990433	false	0	159963	0		0	[E9PLZ7, G3V1E3, Q1EHB4, Q8IUS7]	159963
			3.5413	0			2.Plasma Membrane	2.Plasma Membrane, 3.Intra Cellular	0.282382	1	4	ENSG00000196961	GENE-nonsense_mediated_decay,processed_transcript,protein_coding,retained_intron	160	AP2A1	AP2A1			false	160	331	0	1	ASSOCIATED_NEW_GENE	0	0.992322	false	0	160	0		0	[M0R2D9, O95782]	160
			3.57406	0			3.Intra Cellular	3.Intra Cellular	0.279794	1	4	ENSG00000139324	GENE-nonsense_mediated_decay,protein_coding	160418	TMTC3	TMTC3			false	160418	307	0	1	ASSOCIATED_NEW_GENE	0	0.992223	false	0	160418	0		0	[A8K321, F8VR71, F8VRY4, F8W044, L8ECP4, Q6ZXV5]	160418
			3.5413	0			2.Plasma Membrane	2.Plasma Membrane, 3.Intra Cellular	0.282382	1	4	ENSG00000183020	GENE-nonsense_mediated_decay,processed_transcript,protein_coding,retained_intron	161	AP2A2	AP2A2			false	161	331	0	1	ASSOCIATED_NEW_GENE	0	0.992322	false	0	161	0		0	[A0A0G2JQA4, A0A0G2JQM1, A0A0G2JQT9, A0A0G2JRF9, A0A0G2JRS3, A0A0G2JS17, A0A0G2JS82, E9PNC4, E9PPY8, E9PPZ3, E9PQP4, E9PR62, E9PS94, H0YDE9, H0YEG0, O94973]	161
			3.54676	0			0.Annotation definition not found in 'Homo Sapiens.properties' file	0.Annotation definition not found in 'Homo Sapiens.properties' file	0.281948	1	4	ENSG00000150667	GENE-nonsense_mediated_decay,processed_transcript,protein_coding	161835	FSIP1	FSIP1			false	161835	327	0	1	ASSOCIATED_NEW_GENE	0	0.992306	false	0	161835	0		0	[A0A024R9J2, A0A2R8Y503, A0A2R8YHB5, H0YNV9, Q8NA03]	161835
			3.99317	0			0.Annotation definition not found in 'Homo Sapiens.properties' file	0.Annotation definition not found in 'Homo Sapiens.properties' file	0.250427	1	6	ENSG00000166750	GENE-protein_coding	162394	SLFN5	SLFN5			false	162394	109	0	1	ASSOCIATED_NEW_GENE	0	0.990957	false	0	162394	0		0	[B4E128, Q08AF3]	162394
			3.58362	0			0.Annotation definition not found in 'Homo Sapiens.properties' file	0.Annotation definition not found in 'Homo Sapiens.properties' file	0.279048	1	4	ENSG00000251369	GENE-nonsense_mediated_decay,protein_coding,retained_intron	162972	ZNF550	ZNF550			false	162972	300	0	1	ASSOCIATED_NEW_GENE	0	0.992195	false	0	162972	0		0	[A0A0C4DGB4, M0QWZ8, M0R337, Q7Z398]	162972
			3.54676	0			0.Annotation definition not found in 'Homo Sapiens.properties' file	0.Annotation definition not found in 'Homo Sapiens.properties' file	0.281948	1	4	ENSG00000196605	GENE-nonsense_mediated_decay,processed_transcript,protein_coding,retained_intron	162993	ZNF846	ZNF846			false	162993	327	0	1	ASSOCIATED_NEW_GENE	0	0.992306	false	0	162993	0		0	[K7ELQ5, K7ELV4, K7EML1, K7EMP9, Q147U1]	162993
			3.5413	0			2.Plasma Membrane	2.Plasma Membrane, 3.Intra Cellular	0.282382	1	4	ENSG00000006125	GENE-nonsense_mediated_decay,processed_transcript,protein_coding	163	AP2B1	AP2B1			false	163	331	0	1	ASSOCIATED_NEW_GENE	0	0.992322	false	0	163	0		0	[A0A087WU93, A0A087WXS3, A0A087WYD1, A0A087WZQ6, A0A087X253, A0A140VJE8, H0UID3, H0UID4, H0UID5, K7EJ01, K7EJX1, K7EKZ5, K7EMN7, K7EN71, K7ERB2, P63010, Q96EL6]	163
			3.54676	0			0.Annotation definition not found in 'Homo Sapiens.properties' file	0.Annotation definition not found in 'Homo Sapiens.properties' file	0.281948	1	4	ENSG00000173875	GENE-nonsense_mediated_decay,processed_transcript,protein_coding	163049	ZNF791	ZNF791			false	163049	327	0	1	ASSOCIATED_NEW_GENE	0	0.992306	false	0	163049	0		0	[C9JU55, M0QYQ0, M0R0E8, M0R2N1, Q3KP31]	163049
			3.54676	0			0.Annotation definition not found in 'Homo Sapiens.properties' file	0.Annotation definition not found in 'Homo Sapiens.properties' file	0.281948	1	4	ENSG00000196381	GENE-processed_transcript,protein_coding	163115	ZNF781	ZNF781			false	163115	327	0	1	ASSOCIATED_NEW_GENE	0	0.992306	false	0	163115	0		0	[A0A024R0G3, Q8N8C0]	163115
			3.54676	0			0.Annotation definition not found in 'Homo Sapiens.properties' file	0.Annotation definition not found in 'Homo Sapiens.properties' file	0.281948	1	4	ENSG00000128000	GENE-non_stop_decay,protein_coding,retained_intron	163131	ZNF780B	ZNF780B			false	163131	327	0	1	ASSOCIATED_NEW_GENE	0	0.992306	false	0	163131	0		0	[A0A024R0P7, C9JTJ1, M0R0W9, M0R168, Q9Y6R6]	163131
			3.54676	0			0.Annotation definition not found in 'Homo Sapiens.properties' file	0.Annotation definition not found in 'Homo Sapiens.properties' file	0.281948	1	4	ENSG00000162669	GENE-processed_transcript,protein_coding,retained_intron	164045	HFM1	HFM1			false	164045	327	0	1	ASSOCIATED_NEW_GENE	0	0.992306	false	0	164045	0		0	[A2PYH4, B7ZM00, B7ZM16, C9JA44, C9JQ07, C9JQP7, H0Y3X7]	164045
			4.16655	0			3.Intra Cellular	3.Intra Cellular	0.240007	1	6	ENSG00000170500	GENE-protein_coding	164832	LONRF2	LONRF2			false	164832	58	0	1	ASSOCIATED_NEW_GENE	0	0.990433	false	0	164832	0		0	[B7ZKY9, L8E9U6, Q1L5Z9]	164832
			3.54676	0			1.Extracellular	1.Extracellular, 2.Plasma Membrane, 3.Intra Cellular	0.281948	1	4	ENSG00000215301	GENE-nonsense_mediated_decay,processed_transcript,protein_coding,retained_intron	1654	DDX3X	DDX3X			false	1654	327	0	1	ASSOCIATED_NEW_GENE	0	0.992306	false	0	1654	0		0	[A0A087WVZ1, A0A087WX09, A0A0D9SF53, A0A0D9SFB3, A0A0D9SG12, A0A0J9YVQ7, A0A2R8Y4A4, A0A2R8Y4D2, A0A2R8Y5G6, A0A2R8Y645, A0A2R8Y650, A0A2R8Y770, A0A2R8Y7T2, A0A2R8YCU0, A0A2R8YCW1, A0A2R8YDH3, A0A2R8YDT5, A0A2R8YF31, A0A2R8YF78, A0A2R8YF89, A0A2R8YFR4, A0A2R8YFS5, A0A2R8YGJ1, A0A2U3TZJ9, B5BTY4, F6S8Q4, O00571]	1654
			3.5413	0			2.Plasma Membrane	2.Plasma Membrane	0.282382	1	4	ENSG00000175697	GENE-nonsense_mediated_decay,protein_coding,retained_intron	165829	GPR156	GPR156			false	165829	331	0	1	ASSOCIATED_NEW_GENE	0	0.992322	false	0	165829	0		0	[F8WAW3, Q8NFN8]	165829
			4.06689	0			3.Intra Cellular	3.Intra Cellular	0.245888	1	6	ENSG00000163961	GENE-nonsense_mediated_decay,protein_coding	165918	RNF168	RNF168			false	165918	108	0	1	ASSOCIATED_NEW_GENE	0	0.990734	false	0	165918	0		0	[F8WD60, Q8IYW5]	165918
			3.5413	0			0.Annotation definition not found in 'Homo Sapiens.properties' file	0.Annotation definition not found in 'Homo Sapiens.properties' file	0.282382	1	4	ENSG00000178105	GENE-nonsense_mediated_decay,processed_transcript,protein_coding,retained_intron	1662	DDX10	DDX10			false	1662	331	0	1	ASSOCIATED_NEW_GENE	0	0.992322	false	0	1662	0		0	[A0A3B3ISR7, E9PIF2, Q13206, Q86VR6]	1662
			3.58362	0			0.Annotation definition not found in 'Homo Sapiens.properties' file	0.Annotation definition not found in 'Homo Sapiens.properties' file	0.279048	1	4	ENSG00000181004	GENE-protein_coding	166379	BBS12	BBS12			false	166379	300	0	1	ASSOCIATED_NEW_GENE	0	0.992195	false	0	166379	0		0	[A0A1B1SMW0, C9J8H7, Q6ZW61]	166379
			3.54676	0			0.Annotation definition not found in 'Homo Sapiens.properties' file	0.Annotation definition not found in 'Homo Sapiens.properties' file	0.281948	1	4	ENSG00000169435	GENE-processed_transcript,protein_coding	166824	RASSF6	RASSF6			false	166824	327	0	1	ASSOCIATED_NEW_GENE	0	0.992306	false	0	166824	0		0	[Q6ZTQ3]	166824
			4.06689	0			2.Plasma Membrane	2.Plasma Membrane, 3.Intra Cellular	0.245888	1	6	ENSG00000164023	GENE-processed_transcript,protein_coding	166929	SGMS2	SGMS2			false	166929	108	0	1	ASSOCIATED_NEW_GENE	0	0.990734	false	0	166929	0		0	[A0A024RDH4, E5RGG5, E5RJ63, E5RJU3, Q8NHU3]	166929
			3.58362	0			3.Intra Cellular	3.Intra Cellular	0.279048	1	4	ENSG00000172795	GENE-nonsense_mediated_decay,processed_transcript,protein_coding,retained_intron	167227	DCP2	DCP2			false	167227	300	0	1	ASSOCIATED_NEW_GENE	0	0.992195	false	0	167227	0		0	[A0A6Q8PGI4, A0A6Q8PGL6, B7Z3U5, Q8IU60]	167227
			3.54676	0			3.Intra Cellular	3.Intra Cellular	0.281948	1	4	ENSG00000180694	GENE-processed_transcript,protein_coding	169200	TMEM64	TMEM64			false	169200	327	0	1	ASSOCIATED_NEW_GENE	0	0.992306	false	0	169200	0		0	[B3KW24, E5RIS8, H0Y6S7, Q6YI46]	169200
			4.36724	0			3.Intra Cellular	3.Intra Cellular	0.228978	1	6	ENSG00000204271	GENE-nonsense_mediated_decay,processed_transcript,protein_coding,retained_intron	169981	SPIN3	SPIN3			false	169981	31	0	1	ASSOCIATED_NEW_GENE	0	0.989827	false	0	169981	0		0	[A0A1W2PPF7, A0A1W2PPL1, A0A1W2PQU8, A0A1W2PR54, A0A1W2PRP6, Q5JUX0]	169981
			3.54676	0			0.Annotation definition not found in 'Homo Sapiens.properties' file	0.Annotation definition not found in 'Homo Sapiens.properties' file	0.281948	1	4	ENSG00000189132	GENE-protein_coding	170062	FAM47B	FAM47B			false	170062	327	0	1	ASSOCIATED_NEW_GENE	0	0.992306	false	0	170062	0		0	[Q8NA70]	170062
			3.99317	0			0.Annotation definition not found in 'Homo Sapiens.properties' file	0.Annotation definition not found in 'Homo Sapiens.properties' file	0.250427	1	6	ENSG00000203326	GENE-processed_transcript,protein_coding,retained_intron	170958	ZNF525	ZNF525			false	170958	109	0	1	ASSOCIATED_NEW_GENE	0	0.990957	false	0	170958	0		0	[E7ENB8, E7EUL5, J3KR62, M0QZA4, Q8N782]	170958
			3.5413	0			3.Intra Cellular	3.Intra Cellular	0.282382	1	4	ENSG00000114956	GENE-nonsense_mediated_decay,processed_transcript,protein_coding	1716	DGUOK	DGUOK			false	1716	331	0	1	ASSOCIATED_NEW_GENE	0	0.992322	false	0	1716	0		0	[A0A0S2Z3N1, A0A0S2Z3T7, D6W5I0, E5KSL5, E5KSL6, Q16854, Q9BVK7]	1716
			3.5413	0			3.Intra Cellular	3.Intra Cellular, 4.Nuclear Membrane	0.282382	1	4	ENSG00000172893	GENE-protein_coding,retained_intron	1717	DHCR7	DHCR7			false	1717	331	0	1	ASSOCIATED_NEW_GENE	0	0.992322	false	0	1717	0		0	[A0A024R5F7, A0A0S2Z3N8, A0A0S2Z3S3, A0A0S2Z3U5, A0A1Y1B909, A0A1Y1BBN3, A0A1Y1BG54, A0A804HI25, A0A804HJI8, A0A804HJQ7, A0A804HL56, E9PIP9, E9PJ54, E9PLZ2, E9PM00, E9PQ71, E9PRL8, H0YCS7, H0YE57, H0YEJ5, Q9UBM7, X5D9E1, X5DNI9, X5DRD7]	1717
			4.07099	0			3.Intra Cellular	3.Intra Cellular	0.245641	1	6	ENSG00000228716	GENE-processed_transcript,protein_coding,retained_intron	1719	DHFR	DHFR			false	1719	48	0	1	ASSOCIATED_NEW_GENE	0	0.990722	false	0	1719	0		0	[A0A024RAQ3, B0YJ76, B4DM58, P00374]	1719
			3.58362	0			2.Plasma Membrane	2.Plasma Membrane, 3.Intra Cellular	0.279048	1	4	ENSG00000131504	GENE-nonsense_mediated_decay,processed_transcript,protein_coding,retained_intron	1729	DIAPH1	DIAPH1			false	1729	300	0	1	ASSOCIATED_NEW_GENE	0	0.992195	false	0	1729	0		0	[A0A0G2JH68, A0A140T8Z0, A0A1E1ERW3, A0A2R8Y5N1, A0A2R8YEF8, A0RZB7, A0RZB8, B4E2I7, H7C2W8, H9KV28, O60610, Q6URC4, Q96IL1]	1729
			3.5413	0			3.Intra Cellular	3.Intra Cellular	0.282382	1	4	ENSG00000180096	GENE-nonsense_mediated_decay,processed_transcript,protein_coding,retained_intron	1731	SEPTIN1	SEPTIN1			false	1731	331	0	1	ASSOCIATED_NEW_GENE	0	0.992322	false	0	1731	0		0	[I3L2M1, J3KNL2, Q8WYJ6]	1731
			3.54676	0			1.Extracellular	1.Extracellular, 3.Intra Cellular	0.281948	1	4	ENSG00000157766	GENE-protein_coding,retained_intron	176	ACAN	ACAN			false	176	327	0	1	ASSOCIATED_NEW_GENE	0	0.992306	false	0	176	0		0	[A0A5K1VW97, H0YK70, H0YMF1, P16112, Q6PID9]	176
			3.57406	0			3.Intra Cellular	3.Intra Cellular	0.279794	1	4	ENSG00000138346	GENE-nonsense_mediated_decay,protein_coding,retained_intron	1763	DNA2	DNA2			false	1763	307	0	1	ASSOCIATED_NEW_GENE	0	0.992223	false	0	1763	0		0	[F8VPM6, F8VR31, H0Y455, P51530]	1763
			4.16655	0			3.Intra Cellular	3.Intra Cellular	0.240007	1	6	ENSG00000124721	GENE-protein_coding	1769	DNAH8	DNAH8			false	1769	58	0	1	ASSOCIATED_NEW_GENE	0	0.990433	false	0	1769	0		0	[A0A075B6F3, H0Y7V4, H3BLZ4, Q8IU65, Q8IZR0, Q96JB1]	1769
			3.57406	0			1.Extracellular	1.Extracellular, 3.Intra Cellular	0.279794	1	4	ENSG00000007174	GENE-processed_transcript,protein_coding,retained_intron	1770	DNAH9	DNAH9			false	1770	307	0	1	ASSOCIATED_NEW_GENE	0	0.992223	false	0	1770	0		0	[A2VCN3, A8KAY3, E7EP17, J3QLM9, J3QQK8, K7EMX3, K7EP21, L8E799, Q99499, Q9NYC9]	1770
			3.54676	0			3.Intra Cellular	3.Intra Cellular	0.281948	1	4	ENSG00000135720	GENE-nonsense_mediated_decay,processed_transcript,protein_coding,retained_intron	1783	DYNC1LI2	DYNC1LI2			false	1783	327	0	1	ASSOCIATED_NEW_GENE	0	0.992306	false	0	1783	0		0	[A0A024R6Z0, B4E2E0, H3BU48, H3BUM4, J3KRI4, J3KRZ2, J3KSD2, J3QKK5, O43237, Q63HJ8]	1783
			3.5413	0			2.Plasma Membrane	2.Plasma Membrane, 3.Intra Cellular	0.282382	1	4	ENSG00000088538	GENE-protein_coding	1795	DOCK3	DOCK3			false	1795	331	0	1	ASSOCIATED_NEW_GENE	0	0.992322	false	0	1795	0		0	[A0A2X0SFH6, A3KMG4, L8E7Q6, Q8IZD9]	1795
			3.57406	0			2.Plasma Membrane	2.Plasma Membrane, 3.Intra Cellular	0.279794	1	4	ENSG00000151577	GENE-protein_coding	1814	DRD3	DRD3			false	1814	307	0	1	ASSOCIATED_NEW_GENE	0	0.992223	false	0	1814	0		0	[A1A4V4, A8K8E4, E9PCM4, P35462, Q13167, Q9BXX6, Q9NY31, X5D2G4, X5DP70]	1814
			3.57406	0			3.Intra Cellular	3.Intra Cellular	0.279794	1	4	ENSG00000116017	GENE-nonsense_mediated_decay,processed_transcript,protein_coding,retained_intron	1820	ARID3A	ARID3A			false	1820	307	0	1	ASSOCIATED_NEW_GENE	0	0.992223	false	0	1820	0		0	[H0YFY1, K7EJ04, Q99856]	1820
			3.57406	0			1.Extracellular	1.Extracellular, 2.Plasma Membrane, 3.Intra Cellular	0.279794	1	4	ENSG00000134762	GENE-protein_coding	1825	DSC3	DSC3			false	1825	307	0	1	ASSOCIATED_NEW_GENE	0	0.992223	false	0	1825	0		0	[A0A024RC29, J3QRL9, Q14574, Q9HAX1]	1825
			3.5413	0			1.Extracellular	1.Extracellular, 2.Plasma Membrane, 3.Intra Cellular	0.282382	1	4	ENSG00000096696	GENE-protein_coding,retained_intron	1832	DSP	DSP			false	1832	331	0	1	ASSOCIATED_NEW_GENE	0	0.992322	false	0	1832	0		0	[A0A804HL18, B4DKX6, G1UI31, P15924, Q4LE79]	1832
			3.5413	0			3.Intra Cellular	3.Intra Cellular	0.282382	1	4	ENSG00000168393	GENE-nonsense_mediated_decay,processed_transcript,protein_coding,retained_intron	1841	DTYMK	DTYMK			false	1841	331	0	1	ASSOCIATED_NEW_GENE	0	0.992322	false	0	1841	0		0	[A0A024R4E0, G5E9E9, H7BZ20, H7C312, H7C3A4, P23919, Q53F55, Q6FGU2]	1841
			3.57406	0			3.Intra Cellular	3.Intra Cellular	0.279794	1	4	ENSG00000120129	GENE-protein_coding	1843	DUSP1	DUSP1			false	1843	307	0	1	ASSOCIATED_NEW_GENE	0	0.992223	false	0	1843	0		0	[B4DU40, P28562]	1843
			4.07235	0			2.Plasma Membrane	2.Plasma Membrane, 3.Intra Cellular	0.245558	1	6	ENSG00000108861	GENE-nonsense_mediated_decay,processed_transcript,protein_coding	1845	DUSP3	DUSP3			false	1845	46	0	1	ASSOCIATED_NEW_GENE	0	0.990718	false	0	1845	0		0	[B5BUI8, K7ELG5, K7EPK5, K7ES89, P51452]	1845
			3.54676	0			3.Intra Cellular	3.Intra Cellular	0.281948	1	4	ENSG00000138166	GENE-processed_transcript,protein_coding	1847	DUSP5	DUSP5			false	1847	327	0	1	ASSOCIATED_NEW_GENE	0	0.992306	false	0	1847	0		0	[Q16690]	1847
			3.54676	0			3.Intra Cellular	3.Intra Cellular	0.281948	1	4	ENSG00000139318	GENE-processed_transcript,protein_coding	1848	DUSP6	DUSP6			false	1848	327	0	1	ASSOCIATED_NEW_GENE	0	0.992306	false	0	1848	0		0	[A0A024RBC1, B5BU29, F8VW29, F8VZA4, Q16828, Q53GP9, Q689E8]	1848
			3.5413	0			1.Extracellular	1.Extracellular, 3.Intra Cellular	0.282382	1	4	ENSG00000128951	GENE-nonsense_mediated_decay,processed_transcript,protein_coding,retained_intron	1854	DUT	DUT			false	1854	331	0	1	ASSOCIATED_NEW_GENE	0	0.992322	false	0	1854	0		0	[A0A0C4DGL3, H0YKC5, H0YKI0, H0YMM5, H0YMP1, H0YNJ9, H0YNW5, P33316]	1854
			3.57406	0			3.Intra Cellular	3.Intra Cellular	0.279794	1	4	ENSG00000161202	GENE-nonsense_mediated_decay,processed_transcript,protein_coding,retained_intron	1857	DVL3	DVL3			false	1857	307	0	1	ASSOCIATED_NEW_GENE	0	0.992223	false	0	1857	0		0	[A0A3B3ISG4, A0A3B3ITC6, F8WCF1, L8ECB2, Q92997, Q9UG07]	1857
			4.07099	0			3.Intra Cellular	3.Intra Cellular	0.245641	1	6	ENSG00000157540	GENE-processed_transcript,protein_coding,retained_intron	1859	DYRK1A	DYRK1A			false	1859	48	0	1	ASSOCIATED_NEW_GENE	0	0.990722	false	0	1859	0		0	[A0A2R8Y443, A0A2R8Y6I6, A0A2R8Y6L5, A0A2R8YDF3, A0A2R8YEY4, E7EMI5, N0GVR9, Q13627]	1859
			3.58362	0	Transcription Factor Complex		3.Intra Cellular	3.Intra Cellular	0.279048	1	4	ENSG00000205250	GENE-nonsense_mediated_decay,processed_transcript,protein_coding,retained_intron	1874	E2F4	E2F4			false	1874	300	0	1	ASSOCIATED_NEW_GENE	0	0.992195	false	0	1874	0		0	[A0A024R6W7, H3BMP3, H3BTM3, H3BVE4, I3L1B6, Q16254]	1874
			3.57406	0	Transcription Factor Complex		0.Annotation definition not found in 'Homo Sapiens.properties' file	0.Annotation definition not found in 'Homo Sapiens.properties' file	0.279794	1	4	ENSG00000169016	GENE-nonsense_mediated_decay,protein_coding,retained_intron	1876	E2F6	E2F6			false	1876	307	0	1	ASSOCIATED_NEW_GENE	0	0.992223	false	0	1876	0		0	[A0A0S2Z3K8, F8WC40, F8WEZ5, O75461, Q2Z196, Q2Z197, Q53YM3, Q6Q9Z5, Q6Q9Z7]	1876
			3.58362	0			1.Extracellular	1.Extracellular, 3.Intra Cellular	0.279048	1	4	ENSG00000104823	GENE-nonsense_mediated_decay,processed_transcript,protein_coding,retained_intron	1891	ECH1	ECH1			false	1891	300	0	1	ASSOCIATED_NEW_GENE	0	0.992195	false	0	1891	0		0	[A0A384MR44, M0QXS7, M0QZF6, M0QZW4, M0QZX8, M0R1A2, M0R248, M0R280, Q13011]	1891
			3.57406	0			1.Extracellular	1.Extracellular, 3.Intra Cellular	0.279794	1	4	ENSG00000078401	GENE-protein_coding	1906	EDN1	EDN1			false	1906	307	0	1	ASSOCIATED_NEW_GENE	0	0.992223	false	0	1906	0		0	[P05305, Q6FH53]	1906
			3.58362	0			1.Extracellular	1.Extracellular, 2.Plasma Membrane, 3.Intra Cellular, 5.Nucleus	0.279048	1	4	ENSG00000156508	GENE-processed_transcript,protein_coding,retained_intron	1915	EEF1A1	EEF1A1			false	1915	300	0	1	ASSOCIATED_NEW_GENE	0	0.992195	false	0	1915	0		0	[A0A087WV01, A0A087WVQ9, A0A7I2V3H3, A0A7I2V5N4, A0A7I2V659, A6PW80, P68104, Q504Z0, Q5JR01, Q6IPN6, Q6IPS9, Q6IPT9, Q6NS35, Q6NSH7, Q6P082, Q6P4C9, Q96EB3]	1915
			3.54676	0			3.Intra Cellular	3.Intra Cellular	0.281948	1	4	ENSG00000146066	GENE-protein_coding	192286	HIGD2A	HIGD2A			false	192286	327	0	1	ASSOCIATED_NEW_GENE	0	0.992306	false	0	192286	0		0	[A0A024R7Q3, Q9BW72]	192286
			4.07099	0			1.Extracellular	1.Extracellular, 2.Plasma Membrane, 3.Intra Cellular	0.245641	1	6	ENSG00000167658	GENE-processed_transcript,protein_coding,retained_intron	1938	EEF2	EEF2			false	1938	48	0	1	ASSOCIATED_NEW_GENE	0	0.990722	false	0	1938	0		0	[A0A384N6H1, M0R0I6, P13639, Q6PK56]	1938
			3.5413	0			1.Extracellular	1.Extracellular, 2.Plasma Membrane, 3.Intra Cellular	0.282382	1	4	ENSG00000090776	GENE-protein_coding	1947	EFNB1	EFNB1			false	1947	331	0	1	ASSOCIATED_NEW_GENE	0	0.992322	false	0	1947	0		0	[P98172]	1947
			4.06689	0			1.Extracellular	1.Extracellular, 2.Plasma Membrane, 3.Intra Cellular, 4.Nuclear Membrane	0.245888	1	6	ENSG00000146648	GENE-processed_transcript,protein_coding,retained_intron	1956	EGFR	EGFR			false	1956	108	0	1	ASSOCIATED_NEW_GENE	0	0.990734	false	0	1956	0		0	[A0A068JCC9, A0A068JD88, A0A1Y0DMK7, A0A7S9GFS3, A2VCQ7, A7VMV4, A7VN05, A7VN06, A7VN07, B6RC65, B6RC66, B7Z2I3, C9JYS6, E2I6F5, E7BSV0, E9PFD7, F1JTL6, F2YGG7, G9MC26, G9MC81, I3WA68, I3WA72, I3WA73, L0R6G1, P00533, Q147T7, Q30BI0, Q4H1F3, Q504U8, Q68GS6, Q75MF2, Q8NDU8, Q8WZA5, Q9H3C8, Q9H3D0]	1956
			3.99317	0			2.Plasma Membrane	2.Plasma Membrane	0.250427	1	6	ENSG00000189079	GENE-processed_transcript,protein_coding,retained_intron	196528	ARID2	ARID2			false	196528	109	0	1	ASSOCIATED_NEW_GENE	0	0.990957	false	0	196528	0		0	[A0A087WY37, F8VWP4, F8W108, F8WCU9, Q4G0S8, Q68CP9, Q8WV72]	196528
			3.5413	0			2.Plasma Membrane	2.Plasma Membrane	0.282382	1	4	ENSG00000142627	GENE-processed_transcript,protein_coding	1969	EPHA2	EPHA2			false	1969	331	0	1	ASSOCIATED_NEW_GENE	0	0.992322	false	0	1969	0		0	[A0A024QZA8, P29317, Q8IZL0, Q96HF4]	1969
			3.58362	0			1.Extracellular	1.Extracellular, 3.Intra Cellular	0.279048	1	4	ENSG00000161960	GENE-nonsense_mediated_decay,processed_transcript,protein_coding,retained_intron	1973	EIF4A1	EIF4A1			false	1973	300	0	1	ASSOCIATED_NEW_GENE	0	0.992195	false	0	1973	0		0	[J3KRC2, J3KS25, J3KS93, J3KSZ0, J3KT04, J3KT12, J3KTB5, J3KTN0, J3QKZ9, J3QL43, J3QL52, J3QLN6, J3QQP0, J3QR64, J3QRP5, J3QS69, P60842, Q9NZR9]	1973
			3.99317	0			3.Intra Cellular	3.Intra Cellular	0.250427	1	6	ENSG00000148730	GENE-protein_coding	1979	EIF4EBP2	EIF4EBP2			false	1979	109	0	1	ASSOCIATED_NEW_GENE	0	0.990957	false	0	1979	0		0	[A0A024QZM3, Q13542, Q6FG68]	1979
			3.5413	0			3.Intra Cellular	3.Intra Cellular	0.282382	1	4	ENSG00000114867	GENE-nonsense_mediated_decay,protein_coding,retained_intron	1981	EIF4G1	EIF4G1			false	1981	331	0	1	ASSOCIATED_NEW_GENE	0	0.992322	false	0	1981	0		0	[A0A6Q8PFB2, A0A6Q8PG29, A0A7I2Y1C3, B2RU06, B2RU10, B4DSI9, C9J2Z7, C9J556, C9J6B6, C9J987, C9JF13, C9JHW9, C9JIH5, C9JSU8, C9JWH7, C9JWH9, C9JWW9, C9K073, E7EUU4, E7EX73, E9PGM1, F8WB97, F8WCF2, H7C044, H7C0V6, O95065, Q04637, Q4LE58, Q96I65]	1981
			3.5413	0			1.Extracellular	1.Extracellular, 3.Intra Cellular	0.282382	1	4	ENSG00000021355	GENE-processed_transcript,protein_coding	1992	SERPINB1	SERPINB1			false	1992	331	0	1	ASSOCIATED_NEW_GENE	0	0.992322	false	0	1992	0		0	[P30740, V9HWH1]	1992
			3.57406	0			1.Extracellular	1.Extracellular, 3.Intra Cellular	0.279794	1	4	ENSG00000084652	GENE-protein_coding	200081	TXLNA	TXLNA			false	200081	307	0	1	ASSOCIATED_NEW_GENE	0	0.992223	false	0	200081	0		0	[A0AUK0, P40222]	200081
			4.06689	0			3.Intra Cellular	3.Intra Cellular	0.245888	1	6	ENSG00000181873	GENE-processed_transcript,protein_coding	200205	IBA57	IBA57			false	200205	108	0	1	ASSOCIATED_NEW_GENE	0	0.990734	false	0	200205	0		0	[B4E1G9, Q5T440]	200205
			3.54676	0			3.Intra Cellular	3.Intra Cellular	0.281948	1	4	ENSG00000158711	GENE-nonsense_mediated_decay,processed_transcript,protein_coding	2005	ELK4	ELK4			false	2005	327	0	1	ASSOCIATED_NEW_GENE	0	0.992306	false	0	2005	0		0	[A0A024R985, A0A024R997, A0A087X2F7, P28324, Q8IXL1]	2005
			3.57406	0			1.Extracellular	1.Extracellular, 2.Plasma Membrane, 3.Intra Cellular	0.279794	1	4	ENSG00000185909	GENE-processed_transcript,protein_coding,retained_intron	200942	KLHDC8B	KLHDC8B			false	200942	307	0	1	ASSOCIATED_NEW_GENE	0	0.992223	false	0	200942	0		0	[Q8IXV7, Q96DZ8]	200942
			3.5413	0			2.Plasma Membrane	2.Plasma Membrane	0.282382	1	4	ENSG00000134531	GENE-processed_transcript,protein_coding,retained_intron	2012	EMP1	EMP1			false	2012	331	0	1	ASSOCIATED_NEW_GENE	0	0.992322	false	0	2012	0		0	[A0A024RAT0, F5GYV0, F5H2P5, F5H397, J3KQX4, P54849, Q8WWD6]	2012
			3.57406	0			0.Annotation definition not found in 'Homo Sapiens.properties' file	0.Annotation definition not found in 'Homo Sapiens.properties' file	0.279794	1	4	ENSG00000171574	GENE-processed_transcript,protein_coding,retained_intron	201514	ZNF584	ZNF584			false	201514	307	0	1	ASSOCIATED_NEW_GENE	0	0.992223	false	0	201514	0		0	[B4DQS1, F6W0P0, M0QZA3, M0R0A3, M0R2W6, M0R3F5, Q8IVC4, Q8WVQ2]	201514
			3.57406	0			3.Intra Cellular	3.Intra Cellular	0.279794	1	4	ENSG00000174840	GENE-protein_coding	201626	PDE12	PDE12			false	201626	307	0	1	ASSOCIATED_NEW_GENE	0	0.992223	false	0	201626	0		0	[F6T1Q0, Q6L8Q7]	201626
			3.5413	0			2.Plasma Membrane	2.Plasma Membrane, 3.Intra Cellular	0.282382	1	4	ENSG00000085733	GENE-nonsense_mediated_decay,processed_transcript,protein_coding,retained_intron	2017	CTTN	CTTN			false	2017	331	0	1	ASSOCIATED_NEW_GENE	0	0.992322	false	0	2017	0		0	[A0A024R5M3, A0A0B6XJY7, H0YCD9, H0YEV2, Q14247, Q53HG7]	2017
			4.06689	0			3.Intra Cellular	3.Intra Cellular	0.245888	1	6	ENSG00000163683	GENE-nonsense_mediated_decay,processed_transcript,protein_coding	201895	SMIM14	SMIM14			false	201895	108	0	1	ASSOCIATED_NEW_GENE	0	0.990734	false	0	201895	0		0	[A0A024R9U4, D6R9U3, D6RDB1, D6RGZ0, Q96QK8]	201895
			3.54676	0			2.Plasma Membrane	2.Plasma Membrane, 3.Intra Cellular	0.281948	1	4	ENSG00000170088	GENE-protein_coding	201931	TMEM192	TMEM192			false	201931	327	0	1	ASSOCIATED_NEW_GENE	0	0.992306	false	0	201931	0		0	[D6RAZ6, Q8IY95]	201931
			3.5413	0			0.Annotation definition not found in 'Homo Sapiens.properties' file	0.Annotation definition not found in 'Homo Sapiens.properties' file	0.282382	1	4	ENSG00000112297	GENE-protein_coding,retained_intron	202	CRYBG1	CRYBG1			false	202	331	0	1	ASSOCIATED_NEW_GENE	0	0.992322	false	0	202	0		0	[A0A0J9YWL0, A0A494C1M5, B3KPT0, Q96QW7, Q9Y4K1]	202
			4.07099	0			1.Extracellular	1.Extracellular, 2.Plasma Membrane, 3.Intra Cellular	0.245641	1	6	ENSG00000111674	GENE-nonsense_mediated_decay,processed_transcript,protein_coding,retained_intron	2026	ENO2	ENO2			false	2026	48	0	1	ASSOCIATED_NEW_GENE	0	0.990722	false	0	2026	0		0	[F5H0C8, F5H1C3, P09104, Q6FHV6, U3KQP4, U3KQQ1]	2026
			3.54676	0			1.Extracellular	1.Extracellular, 3.Intra Cellular	0.281948	1	4	ENSG00000183311	GENE-protein_coding,retained_intron	203068	TUBB	TUBB			false	203068	327	0	1	ASSOCIATED_NEW_GENE	0	0.992306	false	0	203068	0		0	[B4DMJ5, B4DQN9, B4DY90, P07437, Q5JP53, Q5ST81, Q5SU16, Q6P602, Q96B85, Q9BUU9]	203068
			3.58362	0	Transcription Factor Complex		3.Intra Cellular	3.Intra Cellular	0.279048	1	4	ENSG00000100393	GENE-processed_transcript,protein_coding,retained_intron	2033	EP300	EP300			false	2033	300	0	1	ASSOCIATED_NEW_GENE	0	0.992195	false	0	2033	0		0	[A0A0U1RR87, A0A669KB12, Q09472, Q7Z6C1]	2033
			3.54676	0			0.Annotation definition not found in 'Homo Sapiens.properties' file	0.Annotation definition not found in 'Homo Sapiens.properties' file	0.281948	1	4	ENSG00000173275	GENE-protein_coding	203523	ZNF449	ZNF449			false	203523	327	0	1	ASSOCIATED_NEW_GENE	0	0.992306	false	0	203523	0		0	[Q6P9G9, Q7Z3P1]	203523
			3.5413	0			1.Extracellular	1.Extracellular, 2.Plasma Membrane, 3.Intra Cellular	0.282382	1	4	ENSG00000079819	GENE-processed_transcript,protein_coding,retained_intron	2037	EPB41L2	EPB41L2			false	2037	331	0	1	ASSOCIATED_NEW_GENE	0	0.992322	false	0	2037	0		0	[A0A2R8Y5B3, B4DJ76, E9PHY5, E9PIG0, E9PII3, E9PJP4, E9PK52, E9PMG5, E9PMV8, E9PN54, E9PPC9, E9PQD2, E9PQN0, E9PRG1, H0Y5B0, I6L9B1, O43491, Q59FD8, Q6R5J7, Q6ZSX4, Q9H1C6]	2037
			3.58362	0			2.Plasma Membrane	2.Plasma Membrane, 3.Intra Cellular	0.279048	1	4	ENSG00000158856	GENE-protein_coding,retained_intron	2039	DMTN	DMTN			false	2039	300	0	1	ASSOCIATED_NEW_GENE	0	0.992195	false	0	2039	0		0	[A0A087WT94, A0A087WUC0, E5RFK4, E5RFK6, E5RGQ0, E5RGQ7, E5RJ61, E5RJC0, Q08495]	2039
			3.57406	0			2.Plasma Membrane	2.Plasma Membrane, 3.Intra Cellular	0.279794	1	4	ENSG00000116106	GENE-nonsense_mediated_decay,processed_transcript,protein_coding,retained_intron	2043	EPHA4	EPHA4			false	2043	307	0	1	ASSOCIATED_NEW_GENE	0	0.992223	false	0	2043	0		0	[A1MA61, C9JEM6, C9JFX5, C9JIX8, E9PG71, F5GZZ5, F8WBU0, H7C1N8, H7C2W7, P54764, Q53TA0, Q584H6, Q58F15]	2043
			3.57406	0			3.Intra Cellular	3.Intra Cellular	0.279794	1	4	ENSG00000162433	GENE-processed_transcript,protein_coding	205	AK4	AK4			false	205	307	0	1	ASSOCIATED_NEW_GENE	0	0.992223	false	0	205	0		0	[A0A384N647, F8VS11, K4Q5R3, P27144]	205
			3.54676	0			1.Extracellular	1.Extracellular, 2.Plasma Membrane, 3.Intra Cellular	0.281948	1	4	ENSG00000111450	GENE-nonsense_mediated_decay,protein_coding,retained_intron	2054	STX2	STX2			false	2054	327	0	1	ASSOCIATED_NEW_GENE	0	0.992306	false	0	2054	0		0	[A0A348AY69, J3KNU7, P32856]	2054
			3.57406	0			5.Nucleus	5.Nucleus	0.279794	1	4	ENSG00000119231	GENE-processed_transcript,protein_coding,retained_intron	205564	SENP5	SENP5			false	205564	307	0	1	ASSOCIATED_NEW_GENE	0	0.992223	false	0	205564	0		0	[B2R9F5, C9JHT8, H7C2F8, H7C424, Q96HI0]	205564
			3.54676	0			1.Extracellular	1.Extracellular, 2.Plasma Membrane, 3.Intra Cellular	0.281948	1	4	ENSG00000151491	GENE-nonsense_mediated_decay,processed_transcript,protein_coding,retained_intron	2059	EPS8	EPS8			false	2059	327	0	1	ASSOCIATED_NEW_GENE	0	0.992306	false	0	2059	0		0	[A0A2R8Y4W2, A0A2R8YE63, B4E3T6, F5GYM8, F5H0R8, F5H1B5, F5H2B8, F5H3Q6, F5H714, H0YFG1, Q12929]	2059
			3.54676	0			2.Plasma Membrane	2.Plasma Membrane, 3.Intra Cellular	0.281948	1	4	ENSG00000085832	GENE-nonsense_mediated_decay,processed_transcript,protein_coding,retained_intron	2060	EPS15	EPS15			false	2060	327	0	1	ASSOCIATED_NEW_GENE	0	0.992306	false	0	2060	0		0	[A0A4D6WHI2, B1AUU8, B7Z240, P42566, S4R3U1]	2060
			3.54676	0			1.Extracellular	1.Extracellular, 2.Plasma Membrane, 3.Intra Cellular	0.281948	1	4	ENSG00000124882	GENE-processed_transcript,protein_coding,retained_intron	2069	EREG	EREG			false	2069	327	0	1	ASSOCIATED_NEW_GENE	0	0.992306	false	0	2069	0		0	[L8E9W3, O14944]	2069
			4.36724	0			2.Plasma Membrane	2.Plasma Membrane, 3.Intra Cellular	0.228978	1	6	ENSG00000142208	GENE-nonsense_mediated_decay,processed_transcript,protein_coding,retained_intron	207	AKT1	AKT1			false	207	31	0	1	ASSOCIATED_NEW_GENE	0	0.989827	false	0	207	0		0	[A0A087WY56, A0A0S2Z3D6, A0A142IKA9, A0A804HJM6, B0LPE5, B3KVH4, G3V2I6, G3V3X1, P31749, X2CV47, X2CVF3]	207
			3.54676	0			3.Intra Cellular	3.Intra Cellular	0.281948	1	4	ENSG00000112319	GENE-nonsense_mediated_decay,processed_transcript,protein_coding,retained_intron	2070	EYA4	EYA4			false	2070	327	0	1	ASSOCIATED_NEW_GENE	0	0.992306	false	0	2070	0		0	[A0A0S2Z3Q2, A0A0S2Z3V9, A0A804HHY3, A0A804HL00, A0A8C8KDW0, B4DIV6, B4DRQ6, E7ESD5, E9PLN6, F2Z2Y1, O95677, Q96CJ7]	2070
			3.54676	0	Transcription Factor Complex		2.Plasma Membrane	2.Plasma Membrane, 3.Intra Cellular	0.281948	1	4	ENSG00000091831	GENE-processed_transcript,protein_coding	2099	ESR1	ESR1			false	2099	327	0	1	ASSOCIATED_NEW_GENE	0	0.992306	false	0	2099	0		0	[A0A125SXV6, A0A125SXV7, A0A125SXV8, A0A125SXV9, A0A125SXW0, A0A125SXW1, A0A125SXW2, A0A125SXW3, A0A1W2PP92, A0A3G1VCY8, A0A4P8D7D1, A0A679EM68, A8KAF4, B0QYW7, B5LY05, B5M0Y2, B5TKC0, B5TKC1, B5TKC2, B5TZ77, B5TZ78, B5TZ79, B5TZ80, B5TZ81, B5TZ82, B5TZ83, B6DP71, B6DP72, B6DP73, B6DP74, B6DP75, B6DU66, B6DU67, B6DU68, B6DU69, B6DU70, C0L927, C0LJA7, C0LJA8, C0LJA9, C0LLI5, C0LLI6, C0LLI7, C0LLI8…	2099
			4.07099	0			2.Plasma Membrane	2.Plasma Membrane, 3.Intra Cellular, 5.Nucleus	0.245641	1	6	ENSG00000139083	GENE-processed_transcript,protein_coding	2120	ETV6	ETV6			false	2120	48	0	1	ASSOCIATED_NEW_GENE	0	0.990722	false	0	2120	0		0	[A0A0S2Z3C9, A0A0S2Z3N6, H0YG25, J3KN52, P41212, Q1XE77, Q9UBM2, Q9UME7]	2120
			3.58362	0			2.Plasma Membrane	2.Plasma Membrane, 3.Intra Cellular, 5.Nucleus	0.279048	1	4	ENSG00000182944	GENE-protein_coding,retained_intron	2130	EWSR1	EWSR1			false	2130	300	0	1	ASSOCIATED_NEW_GENE	0	0.992195	false	0	2130	0		0	[A0A0D9SFL3, B0QYJ3, B0QYJ4, B0QYJ5, B0QYJ6, B0QYJ7, B0QYK0, C9JGE3, F8WC90, H7BY36, Q01844]	2130
			3.5413	0			1.Extracellular	1.Extracellular, 3.Intra Cellular	0.282382	1	4	ENSG00000151348	GENE-nonsense_mediated_decay,processed_transcript,protein_coding,retained_intron	2132	EXT2	EXT2			false	2132	331	0	1	ASSOCIATED_NEW_GENE	0	0.992322	false	0	2132	0		0	[A0A804HHX4, A0A804HIU8, A0A804HJW9, A0A804HKG2, A0A804HKG8, A0A804HL74, A0A804HLF7, D3DR24, Q6NUL1, Q93063]	2132
			3.5413	0			2.Plasma Membrane	2.Plasma Membrane, 3.Intra Cellular	0.282382	1	4	ENSG00000151726	GENE-nonsense_mediated_decay,protein_coding,retained_intron	2180	ACSL1	ACSL1			false	2180	331	0	1	ASSOCIATED_NEW_GENE	0	0.992322	false	0	2180	0		0	[A8K9T3, B4E0R0, B7Z3Z9, D6RER0, D6RG07, E7EPM6, H0Y9U7, H0Y9Z9, P33121, Q108N1, Q108N2]	2180
			3.5413	0			1.Extracellular	1.Extracellular, 2.Plasma Membrane, 3.Intra Cellular	0.282382	1	4	ENSG00000068366	GENE-nonsense_mediated_decay,processed_transcript,protein_coding,retained_intron	2182	ACSL4	ACSL4			false	2182	331	0	1	ASSOCIATED_NEW_GENE	0	0.992322	false	0	2182	0		0	[A0A804HI36, D6RDA8, D6RF95, H0Y9A0, O60488, Q8TAF6]	2182
			3.5413	0			1.Extracellular	1.Extracellular, 3.Intra Cellular	0.282382	1	4	ENSG00000103876	GENE-nonsense_mediated_decay,processed_transcript,protein_coding,retained_intron	2184	FAH	FAH			false	2184	331	0	1	ASSOCIATED_NEW_GENE	0	0.992322	false	0	2184	0		0	[A0A384P5L6, A0A804HJ13, A0A804HJX2, B7Z4W2, H0YLC7, H3BNP8, P16930]	2184
			3.58362	0			2.Plasma Membrane	2.Plasma Membrane, 3.Intra Cellular	0.279048	1	4	ENSG00000120899	GENE-processed_transcript,protein_coding,retained_intron	2185	PTK2B	PTK2B			false	2185	300	0	1	ASSOCIATED_NEW_GENE	0	0.992195	false	0	2185	0		0	[C9JHV9, E5RHL2, E5RJ77, E5RK84, H0YB74, Q14289]	2185
			4.07099	0			3.Intra Cellular	3.Intra Cellular	0.245641	1	6	ENSG00000137124	GENE-protein_coding	219	ALDH1B1	ALDH1B1			false	219	48	0	1	ASSOCIATED_NEW_GENE	0	0.990722	false	0	219	0		0	[A0A0U1RQK9, A0A384MTJ7, P30837]	219
			3.54676	0			1.Extracellular	1.Extracellular, 2.Plasma Membrane, 3.Intra Cellular	0.281948	1	4	ENSG00000083857	GENE-nonsense_mediated_decay,processed_transcript,protein_coding,retained_intron	2195	FAT1	FAT1			false	2195	327	0	1	ASSOCIATED_NEW_GENE	0	0.992306	false	0	2195	0		0	[A0A087WVP1, D6RCE4, D6RHE6, H0Y8F5, H0Y9C8, H0Y9H4, L8E7S1, Q14517]	2195
			3.54676	0			2.Plasma Membrane	2.Plasma Membrane	0.281948	1	4	ENSG00000107731	GENE-protein_coding	219699	UNC5B	UNC5B			false	219699	327	0	1	ASSOCIATED_NEW_GENE	0	0.992306	false	0	219699	0		0	[Q8IZJ1]	219699
			3.54676	0			0.Annotation definition not found in 'Homo Sapiens.properties' file	0.Annotation definition not found in 'Homo Sapiens.properties' file	0.281948	1	4	ENSG00000175395	GENE-processed_transcript,protein_coding	219749	ZNF25	ZNF25			false	219749	327	0	1	ASSOCIATED_NEW_GENE	0	0.992306	false	0	219749	0		0	[P17030]	219749
			3.5413	0			3.Intra Cellular	3.Intra Cellular	0.282382	1	4	ENSG00000162341	GENE-nonsense_mediated_decay,processed_transcript,protein_coding,retained_intron	219931	TPCN2	TPCN2			false	219931	331	0	1	ASSOCIATED_NEW_GENE	0	0.992322	false	0	219931	0		0	[A0A1B0GTM1, A0A1B0GUM5, E7ETX0, Q59G56, Q8NHX9]	219931
			4.06689	0			1.Extracellular	1.Extracellular, 3.Intra Cellular	0.245888	1	6	ENSG00000166147	GENE-nonsense_mediated_decay,processed_transcript,protein_coding,retained_intron	2200	FBN1	FBN1			false	2200	108	0	1	ASSOCIATED_NEW_GENE	0	0.990734	false	0	2200	0		0	[A0A1B1PFX5, A0A6I8PL22, F6U495, H0YN80, H0YND0, L8E6V0, L8E775, P35555, Q75N88, Q75N89]	2200
			3.58362	0			1.Extracellular	1.Extracellular	0.279048	1	4	ENSG00000138829	GENE-processed_transcript,protein_coding,retained_intron	2201	FBN2	FBN2			false	2201	300	0	1	ASSOCIATED_NEW_GENE	0	0.992195	false	0	2201	0		0	[A0A6B9XMH6, A0A6B9XP50, D6REJ2, D6RJI3, E9PHW4, L8E7B8, L8E8V5, P35556]	2201
			4.16655	0			0.Annotation definition not found in 'Homo Sapiens.properties' file	0.Annotation definition not found in 'Homo Sapiens.properties' file	0.240007	1	6	ENSG00000150510	GENE-processed_transcript,protein_coding	220108	FAM124A	FAM124A			false	220108	58	0	1	ASSOCIATED_NEW_GENE	0	0.990433	false	0	220108	0		0	[Q86V42]	220108
			3.54676	0			0.Annotation definition not found in 'Homo Sapiens.properties' file	0.Annotation definition not found in 'Homo Sapiens.properties' file	0.281948	1	4	ENSG00000165312	GENE-protein_coding	220213	OTUD1	OTUD1			false	220213	327	0	1	ASSOCIATED_NEW_GENE	0	0.992306	false	0	220213	0		0	[Q5VV17]	220213
			3.57406	0			2.Plasma Membrane	2.Plasma Membrane	0.279794	1	4	ENSG00000165449	GENE-processed_transcript,protein_coding	220963	SLC16A9	SLC16A9			false	220963	307	0	1	ASSOCIATED_NEW_GENE	0	0.992223	false	0	220963	0		0	[Q7RTY1]	220963
			3.58362	0			0.Annotation definition not found in 'Homo Sapiens.properties' file	0.Annotation definition not found in 'Homo Sapiens.properties' file	0.279048	1	4	ENSG00000198298	GENE-protein_coding,retained_intron	220992	ZNF485	ZNF485			false	220992	300	0	1	ASSOCIATED_NEW_GENE	0	0.992195	false	0	220992	0		0	[A0A024R7T5, C9JV60, Q8NCK3]	220992
			3.5413	0			3.Intra Cellular	3.Intra Cellular	0.282382	1	4	ENSG00000165476	GENE-nonsense_mediated_decay,protein_coding	221035	REEP3	REEP3			false	221035	331	0	1	ASSOCIATED_NEW_GENE	0	0.992322	false	0	221035	0		0	[A0A0U1RR85, Q6NUK4, Q8WV73, X5D7U8, X5DP57, X5DR89]	221035
			3.58362	0			0.Annotation definition not found in 'Homo Sapiens.properties' file	0.Annotation definition not found in 'Homo Sapiens.properties' file	0.279048	1	4	ENSG00000171988	GENE-processed_transcript,protein_coding,retained_intron	221037	JMJD1C	JMJD1C			false	221037	300	0	1	ASSOCIATED_NEW_GENE	0	0.992195	false	0	221037	0		0	[A0A1W2PNZ9, A0PJE4, B7ZLC8, H7BXU7, Q15652]	221037
			4.16655	0			3.Intra Cellular	3.Intra Cellular	0.240007	1	6	ENSG00000165997	GENE-protein_coding	221079	ARL5B	ARL5B			false	221079	58	0	1	ASSOCIATED_NEW_GENE	0	0.990433	false	0	221079	0		0	[B0YIW9, Q96KC2]	221079
			3.99317	0			3.Intra Cellular	3.Intra Cellular	0.250427	1	6	ENSG00000166199	GENE-nonsense_mediated_decay,processed_transcript,protein_coding,retained_intron	221120	ALKBH3	ALKBH3			false	221120	109	0	1	ASSOCIATED_NEW_GENE	0	0.990957	false	0	221120	0		0	[E9PN35, E9PRD0, E9PRJ2, E9PSA5, H0YDH4, Q96Q83]	221120
			3.5413	0			1.Extracellular	1.Extracellular	0.282382	1	4	ENSG00000164508	GENE-protein_coding	221613	H2AC1	H2AC1			false	221613	331	0	1	ASSOCIATED_NEW_GENE	0	0.992322	false	0	221613	0		0	[Q96QV6]	221613
			3.99317	0			3.Intra Cellular	3.Intra Cellular	0.250427	1	6	ENSG00000164916	GENE-protein_coding,retained_intron	221937	FOXK1	FOXK1			false	221937	109	0	1	ASSOCIATED_NEW_GENE	0	0.990957	false	0	221937	0		0	[P85037, U3KQ26]	221937
			3.54676	0			0.Annotation definition not found in 'Homo Sapiens.properties' file	0.Annotation definition not found in 'Homo Sapiens.properties' file	0.281948	1	4	ENSG00000187257	GENE-protein_coding,retained_intron	222194	RSBN1L	RSBN1L			false	222194	327	0	1	ASSOCIATED_NEW_GENE	0	0.992306	false	0	222194	0		0	[C9JM20, H7C2D3, Q6PCB5]	222194
			3.99317	0			1.Extracellular	1.Extracellular, 2.Plasma Membrane, 3.Intra Cellular	0.250427	1	6	ENSG00000161048	GENE-nonsense_mediated_decay,protein_coding,retained_intron	222236	NAPEPLD	NAPEPLD			false	222236	109	0	1	ASSOCIATED_NEW_GENE	0	0.990957	false	0	222236	0		0	[C9JGB1, H0Y4Y2, Q4G0T7, Q6IQ20]	222236
			3.5413	0			3.Intra Cellular	3.Intra Cellular, 5.Nucleus	0.282382	1	4	ENSG00000168496	GENE-protein_coding	2237	FEN1	FEN1			false	2237	331	0	1	ASSOCIATED_NEW_GENE	0	0.992322	false	0	2237	0		0	[B4DWZ4, F5H1Y3, I3L3E9, P39748, Q6FHX6]	2237
			3.58362	0			1.Extracellular	1.Extracellular, 3.Intra Cellular	0.279048	1	4	ENSG00000149925	GENE-processed_transcript,protein_coding,retained_intron	226	ALDOA	ALDOA			false	226	300	0	1	ASSOCIATED_NEW_GENE	0	0.992195	false	0	226	0		0	[A0A0M4FNU3, H3BMQ8, H3BPS8, H3BQN4, H3BR04, H3BR68, H3BU78, H3BUH7, J3KPS3, P04075, V9HWN7]	226
			3.5413	0			1.Extracellular	1.Extracellular, 3.Intra Cellular	0.282382	1	4	ENSG00000091483	GENE-nonsense_mediated_decay,processed_transcript,protein_coding,retained_intron	2271	FH	FH			false	2271	331	0	1	ASSOCIATED_NEW_GENE	0	0.992322	false	0	2271	0		0	[A0A0S2Z3S9, A0A0S2Z3W2, A0A0S2Z3X6, A0A0S2Z408, A0A0S2Z4C3, A0A0S2Z4H0, A0A804HI24, A0A804HKE6, A0A804HL52, P07954, Q7Z6G0]	2271
			3.54676	0			2.Plasma Membrane	2.Plasma Membrane, 3.Intra Cellular	0.281948	1	4	ENSG00000088832	GENE-nonsense_mediated_decay,processed_transcript,protein_coding,retained_intron	2280	FKBP1A	FKBP1A			false	2280	327	0	1	ASSOCIATED_NEW_GENE	0	0.992306	false	0	2280	0		0	[A0A087WTS4, A0A087WZM5, A0A7I2V3S6, F6T7Q3, P62942, Q0VDC5, Q0VDC6, Q1JUQ3, Q1JUQ5, Q5W0X3]	2280
			3.58362	0			1.Extracellular	1.Extracellular, 2.Plasma Membrane, 3.Intra Cellular	0.279048	1	4	ENSG00000133818	GENE-nonsense_mediated_decay,protein_coding	22800	RRAS2	RRAS2			false	22800	300	0	1	ASSOCIATED_NEW_GENE	0	0.992195	false	0	22800	0		0	[E9PK85, E9PQ87, E9PQC5, E9PQK5, P62070]	22800
			3.5413	0			2.Plasma Membrane	2.Plasma Membrane	0.282382	1	4	ENSG00000137809	GENE-processed_transcript,protein_coding,retained_intron	22801	ITGA11	ITGA11			false	22801	331	0	1	ASSOCIATED_NEW_GENE	0	0.992322	false	0	22801	0		0	[B3KTN6, Q9UKX5]	22801
			3.57406	0			3.Intra Cellular	3.Intra Cellular	0.279794	1	4	ENSG00000161405	GENE-nonsense_mediated_decay,protein_coding	22806	IKZF3	IKZF3			false	22806	307	0	1	ASSOCIATED_NEW_GENE	0	0.992223	false	0	22806	0		0	[A0A0C4DGN9, Q9UKT9]	22806
			3.5413	0			3.Intra Cellular	3.Intra Cellular	0.282382	1	4	ENSG00000111481	GENE-nonsense_mediated_decay,processed_transcript,protein_coding,retained_intron	22818	COPZ1	COPZ1			false	22818	331	0	1	ASSOCIATED_NEW_GENE	0	0.992322	false	0	22818	0		0	[A0A024RB72, F8VUC5, F8VVA7, F8VXB1, F8VXR1, F8VYE0, F8VYK5, F8VYZ4, F8W156, F8W651, L0R4W7, P61923]	22818
			3.54676	0			3.Intra Cellular	3.Intra Cellular, 5.Nucleus	0.281948	1	4	ENSG00000139289	GENE-protein_coding	22822	PHLDA1	PHLDA1			false	22822	327	0	1	ASSOCIATED_NEW_GENE	0	0.992306	false	0	22822	0		0	[A0A024RBB0, A2BDE7, Q8WV24, R4GND3]	22822
			3.54676	0			0.Annotation definition not found in 'Homo Sapiens.properties' file	0.Annotation definition not found in 'Homo Sapiens.properties' file	0.281948	1	4	ENSG00000198740	GENE-nonsense_mediated_decay,processed_transcript,protein_coding	22834	ZNF652	ZNF652			false	22834	327	0	1	ASSOCIATED_NEW_GENE	0	0.992306	false	0	22834	0		0	[A8K9F2, D6RF85, Q9Y2D9]	22834
			4.16655	0			1.Extracellular	1.Extracellular, 2.Plasma Membrane, 3.Intra Cellular	0.240007	1	6	ENSG00000164292	GENE-nonsense_mediated_decay,processed_transcript,protein_coding,retained_intron	22836	RHOBTB3	RHOBTB3			false	22836	58	0	1	ASSOCIATED_NEW_GENE	0	0.990433	false	0	22836	0		0	[A0A024RAM7, D6R935, D6RC79, D6RG10, H0Y8R9, H0Y9A8, H0Y9P6, H0Y9R7, H0Y9W9, H0YA85, O94955]	22836
			3.57406	0			0.Annotation definition not found in 'Homo Sapiens.properties' file	0.Annotation definition not found in 'Homo Sapiens.properties' file	0.279794	1	4	ENSG00000146083	GENE-nonsense_mediated_decay,processed_transcript,protein_coding,retained_intron	22838	RNF44	RNF44			false	22838	307	0	1	ASSOCIATED_NEW_GENE	0	0.992223	false	0	22838	0		0	[A0A024R7Q1, D6RAW5, D6RHW8, H0Y9W0, Q7L0R7]	22838
			3.57406	0			3.Intra Cellular	3.Intra Cellular	0.279794	1	4	ENSG00000102531	GENE-nonsense_mediated_decay,protein_coding	22862	FNDC3A	FNDC3A			false	22862	307	0	1	ASSOCIATED_NEW_GENE	0	0.992223	false	0	22862	0		0	[A0A024RDT9, A0A024RDV5, A0A087X1M6, G5E9X3, H7C507, Q9Y2H6]	22862
			3.99317	0			0.Annotation definition not found in 'Homo Sapiens.properties' file	0.Annotation definition not found in 'Homo Sapiens.properties' file	0.250427	1	6	ENSG00000081386	GENE-processed_transcript,protein_coding,retained_intron	22869	ZNF510	ZNF510			false	22869	109	0	1	ASSOCIATED_NEW_GENE	0	0.990957	false	0	22869	0		0	[Q6NUI8, Q9Y2H8]	22869
			3.54676	0			3.Intra Cellular	3.Intra Cellular	0.281948	1	4	ENSG00000132640	GENE-nonsense_mediated_decay,processed_transcript,protein_coding	22903	BTBD3	BTBD3			false	22903	327	0	1	ASSOCIATED_NEW_GENE	0	0.992306	false	0	22903	0		0	[B0QYQ9, B0QYR0, B0QYR1, B4DK27, B4DRI6, F8WAQ4, Q52M42, Q9Y2F9]	22903
			3.99317	0			0.Annotation definition not found in 'Homo Sapiens.properties' file	0.Annotation definition not found in 'Homo Sapiens.properties' file	0.250427	1	6	ENSG00000125970	GENE-processed_transcript,protein_coding,retained_intron	22913	RALY	RALY			false	22913	109	0	1	ASSOCIATED_NEW_GENE	0	0.990957	false	0	22913	0		0	[L8E7Y8, Q53GL6, Q5QPL9, Q5QPM0, Q5QPM1, Q5QPM2, Q9UKM9]	22913
			3.5413	0			3.Intra Cellular	3.Intra Cellular	0.282382	1	4	ENSG00000114503	GENE-nonsense_mediated_decay,processed_transcript,protein_coding,retained_intron	22916	NCBP2	NCBP2			false	22916	331	0	1	ASSOCIATED_NEW_GENE	0	0.992322	false	0	22916	0		0	[B3KSB0, C9JKF4, C9JQX9, F8WE41, P52298]	22916
			3.5413	0			3.Intra Cellular	3.Intra Cellular	0.282382	1	4	ENSG00000153574	GENE-protein_coding	22934	RPIA	RPIA			false	22934	331	0	1	ASSOCIATED_NEW_GENE	0	0.992322	false	0	22934	0		0	[L0R8E0, P49247, Q53R32, Q53SB2]	22934
			3.5413	0			3.Intra Cellular	3.Intra Cellular	0.282382	1	4	ENSG00000076685	GENE-nonsense_mediated_decay,processed_transcript,protein_coding,retained_intron	22978	NT5C2	NT5C2			false	22978	331	0	1	ASSOCIATED_NEW_GENE	0	0.992322	false	0	22978	0		0	[A0A384MED8, A0A6Q8PEZ2, A0A6Q8PF50, A0A6Q8PFH2, A0A6Q8PG36, A0A6Q8PHB5, A0A6Q8PHP0, A8K6K2, H0YHR8, P49902, Q5JUV4, Q5JUV6, S4R3A6, S4R3E7]	22978
			3.58362	0			0.Annotation definition not found in 'Homo Sapiens.properties' file	0.Annotation definition not found in 'Homo Sapiens.properties' file	0.279048	1	4	ENSG00000141002	GENE-nonsense_mediated_decay,processed_transcript,protein_coding,retained_intron	22980	TCF25	TCF25			false	22980	300	0	1	ASSOCIATED_NEW_GENE	0	0.992195	false	0	22980	0		0	[H3BMJ8, H3BPU1, H3BQ53, H3BR53, H3BRP4, H3BS87, H3BSP8, H3BSS3, H3BTU3, Q9BQ70, Q9H384, Q9H7D3]	22980
			3.58362	0			3.Intra Cellular	3.Intra Cellular	0.279048	1	4	ENSG00000204574	GENE-nonsense_mediated_decay,processed_transcript,protein_coding,retained_intron	23	ABCF1	ABCF1			false	23	300	0	1	ASSOCIATED_NEW_GENE	0	0.992195	false	0	23	0		0	[A0A0G2JIC2, A0A0G2JJB9, A0A1U9X609, A0PJ72, F5GYK6, H0YGW7, L0R6B8, Q2L6I2, Q5STZ8, Q8NE71]	23
			4.06689	0			1.Extracellular	1.Extracellular, 3.Intra Cellular	0.245888	1	6	ENSG00000109107	GENE-protein_coding,retained_intron	230	ALDOC	ALDOC			false	230	108	0	1	ASSOCIATED_NEW_GENE	0	0.990734	false	0	230	0		0	[A0A024QZ64, A8MVZ9, C9J8F3, J3KSV6, J3QKK1, J3QKP5, K7EKH5, P09972]	230
			3.54676	0			0.Annotation definition not found in 'Homo Sapiens.properties' file	0.Annotation definition not found in 'Homo Sapiens.properties' file	0.281948	1	4	ENSG00000176678	GENE-protein_coding	2300	FOXL1	FOXL1			false	2300	327	0	1	ASSOCIATED_NEW_GENE	0	0.992306	false	0	2300	0		0	[M0R279, Q12952, Q498Y4]	2300
			3.54676	0			3.Intra Cellular	3.Intra Cellular	0.281948	1	4	ENSG00000172765	GENE-processed_transcript,protein_coding,retained_intron	23023	TMCC1	TMCC1			false	23023	327	0	1	ASSOCIATED_NEW_GENE	0	0.992306	false	0	23023	0		0	[D6RBT7, D6RH19, E9PC87, O94876, Q6N039, Q8N4H2]	23023
			3.58362	0	Transcription Factor Complex		0.Annotation definition not found in 'Homo Sapiens.properties' file	0.Annotation definition not found in 'Homo Sapiens.properties' file	0.279048	1	4	ENSG00000004487	GENE-nonsense_mediated_decay,protein_coding,retained_intron	23028	KDM1A	KDM1A			false	23028	300	0	1	ASSOCIATED_NEW_GENE	0	0.992195	false	0	23028	0		0	[O60341, R4GMP9, R4GMQ1]	23028
			3.5413	0			0.Annotation definition not found in 'Homo Sapiens.properties' file	0.Annotation definition not found in 'Homo Sapiens.properties' file	0.282382	1	4	ENSG00000099308	GENE-nonsense_mediated_decay,processed_transcript,protein_coding,retained_intron	23031	MAST3	MAST3			false	23031	331	0	1	ASSOCIATED_NEW_GENE	0	0.992322	false	0	23031	0		0	[O60307, V9GYV0]	23031
			3.5413	0			0.Annotation definition not found in 'Homo Sapiens.properties' file	0.Annotation definition not found in 'Homo Sapiens.properties' file	0.282382	1	4			23044	23044	23044			false	23044	331	0	1	ASSOCIATED_NEW_GENE	0	0.992322	false	0	23044	0		0		23044
			3.54676	0			3.Intra Cellular	3.Intra Cellular	0.281948	1	4	ENSG00000157106	GENE-nonsense_mediated_decay,processed_transcript,protein_coding,retained_intron	23049	SMG1	SMG1			false	23049	327	0	1	ASSOCIATED_NEW_GENE	0	0.992306	false	0	23049	0		0	[A0A087WXM7, A0A087X1K8, E9PNP6, H3BPS6, H3BQN7, H3BR09, I3L0W2, I3L144, I3L400, J3KRA9, Q96Q15]	23049
			3.57406	0			0.Annotation definition not found in 'Homo Sapiens.properties' file	0.Annotation definition not found in 'Homo Sapiens.properties' file	0.279794	1	4	ENSG00000197226	GENE-nonsense_mediated_decay,processed_transcript,protein_coding,retained_intron	23061	TBC1D9B	TBC1D9B			false	23061	307	0	1	ASSOCIATED_NEW_GENE	0	0.992223	false	0	23061	0		0	[A1L3A9, B3KM54, B9A6K8, E5RIN2, G3V133, H0YB08, H0YB58, Q66K14, Q9BW24]	23061
			3.58362	0			3.Intra Cellular	3.Intra Cellular	0.279048	1	4	ENSG00000127463	GENE-nonsense_mediated_decay,protein_coding,retained_intron	23065	EMC1	EMC1			false	23065	300	0	1	ASSOCIATED_NEW_GENE	0	0.992195	false	0	23065	0		0	[A0A286YEW0, H7C4E3, H7C5A2, Q5TG59, Q8N766]	23065
			3.99317	0			0.Annotation definition not found in 'Homo Sapiens.properties' file	0.Annotation definition not found in 'Homo Sapiens.properties' file	0.250427	1	6	ENSG00000139718	GENE-protein_coding	23067	SETD1B	SETD1B			false	23067	109	0	1	ASSOCIATED_NEW_GENE	0	0.990957	false	0	23067	0		0	[A0A0A0MQV9, Q9UPS6]	23067
			3.58362	0			2.Plasma Membrane	2.Plasma Membrane, 3.Intra Cellular	0.279048	1	4	ENSG00000133789	GENE-nonsense_mediated_decay,protein_coding,retained_intron	23075	SWAP70	SWAP70			false	23075	300	0	1	ASSOCIATED_NEW_GENE	0	0.992195	false	0	23075	0		0	[B3KUB9, E7EMB1, E9PJK8, E9PJM7, H0YDK5, Q9UH65]	23075
			3.5413	0			3.Intra Cellular	3.Intra Cellular, 5.Nucleus	0.282382	1	4	ENSG00000160208	GENE-protein_coding,retained_intron	23076	RRP1B	RRP1B			false	23076	331	0	1	ASSOCIATED_NEW_GENE	0	0.992322	false	0	23076	0		0	[Q14684, Q6PJM8]	23076
			3.57406	0			2.Plasma Membrane	2.Plasma Membrane, 3.Intra Cellular	0.279794	1	4	ENSG00000082805	GENE-nonsense_mediated_decay,processed_transcript,protein_coding,retained_intron	23085	ERC1	ERC1			false	23085	307	0	1	ASSOCIATED_NEW_GENE	0	0.992223	false	0	23085	0		0	[G8JLD3, K7EIZ7, K7EKH8, K7EP25, K7EPD6, K7EPP6, Q8IUD2, X6RLX0, X6RM00]	23085
			3.5413	0			1.Extracellular	1.Extracellular, 2.Plasma Membrane, 3.Intra Cellular	0.282382	1	4	ENSG00000085662	GENE-nonsense_mediated_decay,processed_transcript,protein_coding,retained_intron	231	AKR1B1	AKR1B1			false	231	331	0	1	ASSOCIATED_NEW_GENE	0	0.992322	false	0	231	0		0	[A0A024R7A8, E9PCX2, E9PEF9, P15121]	231
			3.57406	0			3.Intra Cellular	3.Intra Cellular	0.279794	1	4	ENSG00000053524	GENE-processed_transcript,protein_coding,retained_intron	23101	MCF2L2	MCF2L2			false	23101	307	0	1	ASSOCIATED_NEW_GENE	0	0.992223	false	0	23101	0		0	[A0A1W2PP43, A0A2X0U2L0, C9J326, Q86YR7]	23101
			4.07235	0			0.Annotation definition not found in 'Homo Sapiens.properties' file	0.Annotation definition not found in 'Homo Sapiens.properties' file	0.245558	1	6	ENSG00000169635	GENE-protein_coding	23119	HIC2	HIC2			false	23119	46	0	1	ASSOCIATED_NEW_GENE	0	0.990718	false	0	23119	0		0	[Q96JB3]	23119
			3.5413	0			3.Intra Cellular	3.Intra Cellular	0.282382	1	4	ENSG00000143442	GENE-nonsense_mediated_decay,protein_coding,retained_intron	23126	POGZ	POGZ			false	23126	331	0	1	ASSOCIATED_NEW_GENE	0	0.992322	false	0	23126	0		0	[A0A0G2JHK5, A0A2S0X0J5, A0A2S0X0P7, A6PW30, E9PIR8, E9PJY9, H0YCT3, H7C238, M0R2X2, Q7Z3K3]	23126
			3.57406	0			2.Plasma Membrane	2.Plasma Membrane	0.279794	1	4	ENSG00000004399	GENE-nonsense_mediated_decay,protein_coding,retained_intron	23129	PLXND1	PLXND1			false	23129	307	0	1	ASSOCIATED_NEW_GENE	0	0.992223	false	0	23129	0		0	[D6RH25, H0Y9D1, H0YA64, H0YAB2, H0YAM9, Q6P657, Q9Y4D7]	23129
			3.99317	0			0.Annotation definition not found in 'Homo Sapiens.properties' file	0.Annotation definition not found in 'Homo Sapiens.properties' file	0.250427	1	6	ENSG00000132510	GENE-processed_transcript,protein_coding	23135	KDM6B	KDM6B			false	23135	109	0	1	ASSOCIATED_NEW_GENE	0	0.990957	false	0	23135	0		0	[I3L0Z0, O15054]	23135
			4.06689	0			3.Intra Cellular	3.Intra Cellular	0.245888	1	6	ENSG00000020129	GENE-processed_transcript,protein_coding	23154	NCDN	NCDN			false	23154	108	0	1	ASSOCIATED_NEW_GENE	0	0.990734	false	0	23154	0		0	[C9J5H8, H7C2R2, Q9UBB6]	23154
			3.54676	0			3.Intra Cellular	3.Intra Cellular, 4.Nuclear Membrane	0.281948	1	4	ENSG00000121940	GENE-nonsense_mediated_decay,processed_transcript,protein_coding,retained_intron	23155	CLCC1	CLCC1			false	23155	327	0	1	ASSOCIATED_NEW_GENE	0	0.992306	false	0	23155	0		0	[A0A024R095, A0A024R0G0, A0A6Q8PEZ7, A0A6Q8PF11, A0A6Q8PF97, A0A6Q8PFF7, A0A6Q8PFH1, A0A6Q8PFT6, A0A6Q8PG14, A0A6Q8PG30, A0A6Q8PG68, A0A6Q8PG75, A0A6Q8PGA4, A0A6Q8PHQ1, Q5T1P5, Q96S66]	23155
			3.58362	0			1.Extracellular	1.Extracellular, 2.Plasma Membrane, 3.Intra Cellular, 5.Nucleus	0.279048	1	4	ENSG00000196924	GENE-nonsense_mediated_decay,processed_transcript,protein_coding,retained_intron	2316	FLNA	FLNA			false	2316	300	0	1	ASSOCIATED_NEW_GENE	0	0.992195	false	0	2316	0		0	[A0A075TKX8, A0A075TSG1, A0A087WWY3, A0A669KBC6, A0A7I2V3E6, A0A7P0NMY4, A0A7S5A4Z7, A6NDY9, F8WE98, H0Y5C6, H0Y5F3, H7C2E7, P21333, Q2VP91, Q60FE5, Q60FE6, Q6NXF2]	2316
			3.57406	0			3.Intra Cellular	3.Intra Cellular	0.279794	1	4	ENSG00000125447	GENE-nonsense_mediated_decay,protein_coding,retained_intron	23163	GGA3	GGA3			false	23163	307	0	1	ASSOCIATED_NEW_GENE	0	0.992223	false	0	23163	0		0	[A0A087WYN2, A8K6M0, B7Z1E9, B7Z456, G3V1K5, J3KS27, J3KSG3, J3KSS7, J3KTR5, J3QRK7, J3QRP3, J3QRS8, J3QS87, Q9NZ52]	23163
			3.5413	0			3.Intra Cellular	3.Intra Cellular	0.282382	1	4	ENSG00000100304	GENE-processed_transcript,protein_coding,retained_intron	23170	TTLL12	TTLL12			false	23170	331	0	1	ASSOCIATED_NEW_GENE	0	0.992322	false	0	23170	0		0	[A0A024R4U3, Q14166, V9GY16]	23170
			3.57406	0			3.Intra Cellular	3.Intra Cellular, 5.Nucleus	0.279794	1	4	ENSG00000107929	GENE-nonsense_mediated_decay,processed_transcript,protein_coding,retained_intron	23185	LARP4B	LARP4B			false	23185	307	0	1	ASSOCIATED_NEW_GENE	0	0.992223	false	0	23185	0		0	[A0A087X183, B5MCU2, H0Y4V9, H0Y641, Q92615, V9GYI5, X6RCG6]	23185
			3.54676	0	Transcription Factor Complex		0.Annotation definition not found in 'Homo Sapiens.properties' file	0.Annotation definition not found in 'Homo Sapiens.properties' file	0.281948	1	4	ENSG00000089902	GENE-nonsense_mediated_decay,protein_coding,retained_intron	23186	RCOR1	RCOR1			false	23186	327	0	1	ASSOCIATED_NEW_GENE	0	0.992306	false	0	23186	0		0	[H0YNY4, L0R8D2, Q9UKL0]	23186
			3.57406	0			1.Extracellular	1.Extracellular, 2.Plasma Membrane, 3.Intra Cellular	0.279794	1	4	ENSG00000165688	GENE-processed_transcript,protein_coding,retained_intron	23203	PMPCA	PMPCA			false	23203	307	0	1	ASSOCIATED_NEW_GENE	0	0.992223	false	0	23203	0		0	[Q10713, Q24JU5, Q5SXN9, Q9BT52]	23203
			3.5413	0			3.Intra Cellular	3.Intra Cellular	0.282382	1	4	ENSG00000130749	GENE-processed_transcript,protein_coding,retained_intron	23211	ZC3H4	ZC3H4			false	23211	331	0	1	ASSOCIATED_NEW_GENE	0	0.992322	false	0	23211	0		0	[M0QY97, Q9UPT8]	23211
			3.54676	0			3.Intra Cellular	3.Intra Cellular	0.281948	1	4	ENSG00000117523	GENE-processed_transcript,protein_coding,retained_intron	23215	PRRC2C	PRRC2C			false	23215	327	0	1	ASSOCIATED_NEW_GENE	0	0.992306	false	0	23215	0		0	[A0A0A0MS30, A0A2R8Y424, A0A2R8Y7F4, A0A2R8YET2, E7EPN9, H7C5N8, Q9Y520]	23215
			3.54676	0			0.Annotation definition not found in 'Homo Sapiens.properties' file	0.Annotation definition not found in 'Homo Sapiens.properties' file	0.281948	1	4	ENSG00000143756	GENE-nonsense_mediated_decay,protein_coding,retained_intron	23219	FBXO28	FBXO28			false	23219	327	0	1	ASSOCIATED_NEW_GENE	0	0.992306	false	0	23219	0		0	[B4E0H5, Q9NVF7]	23219
			3.5413	0			1.Extracellular	1.Extracellular, 2.Plasma Membrane, 3.Intra Cellular, 4.Nuclear Membrane	0.282382	1	4	ENSG00000054654	GENE-nonsense_mediated_decay,processed_transcript,protein_coding,retained_intron	23224	SYNE2	SYNE2			false	23224	331	0	1	ASSOCIATED_NEW_GENE	0	0.992322	false	0	23224	0		0	[A0A0A0MRE3, A0A0C4DGK3, A0A1W2PRN9, A0A1W2PS37, A0A669KB22, A0A669KB61, A0A669KBG2, A0A669KBH2, G3V2Q0, G3V3D4, G3V4T3, G3V5N1, G3V5X4, Q6MZP0, Q8WXH0]	23224
			3.54676	0			3.Intra Cellular	3.Intra Cellular	0.281948	1	4	ENSG00000154822	GENE-processed_transcript,protein_coding	23228	PLCL2	PLCL2			false	23228	327	0	1	ASSOCIATED_NEW_GENE	0	0.992306	false	0	23228	0		0	[H7C276, Q9UPR0]	23228
			3.54676	0			3.Intra Cellular	3.Intra Cellular	0.281948	1	4	ENSG00000170145	GENE-processed_transcript,protein_coding	23235	SIK2	SIK2			false	23235	327	0	1	ASSOCIATED_NEW_GENE	0	0.992306	false	0	23235	0		0	[A0A024R3G7, Q9H0K1]	23235
			4.06689	0			3.Intra Cellular	3.Intra Cellular	0.245888	1	6	ENSG00000179364	GENE-nonsense_mediated_decay,processed_transcript,protein_coding,retained_intron	23241	PACS2	PACS2			false	23241	108	0	1	ASSOCIATED_NEW_GENE	0	0.990734	false	0	23241	0		0	[F8VW41, F8W0B1, Q86VP3, Q8N7J0]	23241
			3.58362	0			0.Annotation definition not found in 'Homo Sapiens.properties' file	0.Annotation definition not found in 'Homo Sapiens.properties' file	0.279048	1	4	ENSG00000163125	GENE-processed_transcript,protein_coding	23248	RPRD2	RPRD2			false	23248	300	0	1	ASSOCIATED_NEW_GENE	0	0.992195	false	0	23248	0		0	[Q5VT52]	23248
			3.54676	0			1.Extracellular	1.Extracellular, 2.Plasma Membrane, 3.Intra Cellular	0.281948	1	4	ENSG00000168502	GENE-nonsense_mediated_decay,processed_transcript,protein_coding,retained_intron	23255	MTCL1	MTCL1			false	23255	327	0	1	ASSOCIATED_NEW_GENE	0	0.992306	false	0	23255	0		0	[J3QL92, J3QLE1, Q9Y4B5]	23255
			4.07099	0			3.Intra Cellular	3.Intra Cellular	0.245641	1	6	ENSG00000085788	GENE-nonsense_mediated_decay,processed_transcript,protein_coding,retained_intron	23259	DDHD2	DDHD2			false	23259	48	0	1	ASSOCIATED_NEW_GENE	0	0.990722	false	0	23259	0		0	[B3KPM6, E9PIF5, E9PK57, E9PKE6, E9PM60, E9PP45, E9PPH8, E9PPN2, E9PQY9, H0YE64, H0YF17, H0YF30, O94830]	23259
			3.5413	0			3.Intra Cellular	3.Intra Cellular, 5.Nucleus	0.282382	1	4	ENSG00000171735	GENE-nonsense_mediated_decay,processed_transcript,protein_coding	23261	CAMTA1	CAMTA1			false	23261	331	0	1	ASSOCIATED_NEW_GENE	0	0.992322	false	0	23261	0		0	[A0A0C4DGL0, G3V297, H0YJG5, H0YJK7, H0YJR7, H0YJV1, H0YJY7, Q7Z7P1, Q9Y6Y1]	23261
			3.58362	0			3.Intra Cellular	3.Intra Cellular	0.279048	1	4	ENSG00000107554	GENE-protein_coding,retained_intron	23268	DNMBP	DNMBP			false	23268	300	0	1	ASSOCIATED_NEW_GENE	0	0.992195	false	0	23268	0		0	[A0A1B0GTX1, A0A1C7CYY6, A0A2X0U4N6, B3KY33, Q6XZF7]	23268
			3.5413	0			0.Annotation definition not found in 'Homo Sapiens.properties' file	0.Annotation definition not found in 'Homo Sapiens.properties' file	0.282382	1	4	ENSG00000163946	GENE-processed_transcript,protein_coding,retained_intron	23272	TASOR	TASOR			false	23272	331	0	1	ASSOCIATED_NEW_GENE	0	0.992322	false	0	23272	0		0	[A0A087X0F1, Q9UK61]	23272
			3.57406	0			3.Intra Cellular	3.Intra Cellular	0.279794	1	4	ENSG00000076258	GENE-processed_transcript,protein_coding	2329	FMO4	FMO4			false	2329	307	0	1	ASSOCIATED_NEW_GENE	0	0.992223	false	0	2329	0		0	[P31512]	2329
			3.5413	0			2.Plasma Membrane	2.Plasma Membrane, 3.Intra Cellular	0.282382	1	4	ENSG00000164398	GENE-nonsense_mediated_decay,processed_transcript,protein_coding,retained_intron	23305	ACSL6	ACSL6			false	23305	331	0	1	ASSOCIATED_NEW_GENE	0	0.992322	false	0	23305	0		0	[A0A494BZW8, A0A494C005, A0A494C046, A0A494C0A5, A0A494C0B6, A0A494C0D5, A0A494C0J9, A0A494C0V0, A0A494C1I9, A0A499FJL5, B2RB13, B4DFW3, C9J3Z0, C9J4I1, C9J8C7, C9JK59, C9JPA5, C9JT10, D3DQ84, E7ERD7, Q9UKU0]	23305
			3.57406	0			4.Nuclear Membrane	4.Nuclear Membrane	0.279794	1	4	ENSG00000166881	GENE-nonsense_mediated_decay,processed_transcript,protein_coding	23306	NEMP1	NEMP1			false	23306	307	0	1	ASSOCIATED_NEW_GENE	0	0.992223	false	0	23306	0		0	[G3V5K2, O14524]	23306
			3.57406	0			1.Extracellular	1.Extracellular, 2.Plasma Membrane, 3.Intra Cellular	0.279794	1	4	ENSG00000160223	GENE-protein_coding	23308	ICOSLG	ICOSLG			false	23308	307	0	1	ASSOCIATED_NEW_GENE	0	0.992223	false	0	23308	0		0	[A0A2R8Y5W7, A0N0L8, B7Z1W8, K4DIA0, O75144]	23308
			3.57406	0			0.Annotation definition not found in 'Homo Sapiens.properties' file	0.Annotation definition not found in 'Homo Sapiens.properties' file	0.279794	1	4	ENSG00000100364	GENE-nonsense_mediated_decay,processed_transcript,protein_coding,retained_intron	23313	KIAA0930	KIAA0930			false	23313	307	0	1	ASSOCIATED_NEW_GENE	0	0.992223	false	0	23313	0		0	[B0AZU2, B0QY16, B0QY18, B0QY20, F8WD08, H7C1U5, Q6ICG6, V9GYW7, V9GZ62]	23313
			3.5413	0	Transcription Factor Complex		0.Annotation definition not found in 'Homo Sapiens.properties' file	0.Annotation definition not found in 'Homo Sapiens.properties' file	0.282382	1	4	ENSG00000119042	GENE-nonsense_mediated_decay,processed_transcript,protein_coding,retained_intron	23314	SATB2	SATB2			false	23314	331	0	1	ASSOCIATED_NEW_GENE	0	0.992322	false	0	23314	0		0	[A0A024R3U6, B3KPQ9, C9JR56, F8WCV6, Q59FT3, Q9UPW6]	23314
			3.54676	0			3.Intra Cellular	3.Intra Cellular	0.281948	1	4	ENSG00000109654	GENE-nonsense_mediated_decay,processed_transcript,protein_coding,retained_intron	23321	TRIM2	TRIM2			false	23321	327	0	1	ASSOCIATED_NEW_GENE	0	0.992306	false	0	23321	0		0	[A0A0J9YW02, A0A0J9YW70, A0A0J9YX34, A0A6Q8PEY7, A0A6Q8PEY9, A0A6Q8PF63, A0A6Q8PF74, A0A6Q8PF82, A0A6Q8PFB0, A0A6Q8PFD3, A0A6Q8PFE3, A0A6Q8PFI4, A0A6Q8PFM2, A0A6Q8PFP1, A0A6Q8PFS5, A0A6Q8PFV0, A0A6Q8PFX3, A0A6Q8PG16, A0A6Q8PG79, A0A6Q8PG80, A0A6Q8PG97, A0A6Q8PGE9, A0A6Q8PGF3, A0A6Q8PGG4, A0A6Q8PGK8, A0A6Q8PGL5, A0A6Q8PGM7, A0A6Q8PGR7, A0A6Q8PGS7, A0A6Q8PGW9, A0A6Q8PGZ0, A0A6Q8PH39, A0A6Q8PHB2, A0…	23321
			3.99317	0	Transcription Factor Complex		0.Annotation definition not found in 'Homo Sapiens.properties' file	0.Annotation definition not found in 'Homo Sapiens.properties' file	0.250427	1	6	ENSG00000124422	GENE-nonsense_mediated_decay,processed_transcript,protein_coding,retained_intron	23326	USP22	USP22			false	23326	109	0	1	ASSOCIATED_NEW_GENE	0	0.990957	false	0	23326	0		0	[J3QRV6, J3QS30, K7ERX6, K7ESK0, Q9UPT9]	23326
			3.54676	0			3.Intra Cellular	3.Intra Cellular	0.281948	1	4	ENSG00000111961	GENE-nonsense_mediated_decay,processed_transcript,protein_coding,retained_intron	23328	SASH1	SASH1			false	23328	327	0	1	ASSOCIATED_NEW_GENE	0	0.992306	false	0	23328	0		0	[A0A087WW74, A0A1B0GVF9, A0A1B0GVI0, A0A1B0GWB9, L8EAS6, O94885, Q6P4R9]	23328
			3.54676	0			0.Annotation definition not found in 'Homo Sapiens.properties' file	0.Annotation definition not found in 'Homo Sapiens.properties' file	0.281948	1	4	ENSG00000101596	GENE-nonsense_mediated_decay,processed_transcript,protein_coding,retained_intron	23347	SMCHD1	SMCHD1			false	23347	327	0	1	ASSOCIATED_NEW_GENE	0	0.992306	false	0	23347	0		0	[A0A2R8YCU7, A0A2R8YE92, A6NHR9, J3KRK8, J3KTK7, J3KTL8, J3QSH1, L0R6P7]	23347
			3.5413	0			2.Plasma Membrane	2.Plasma Membrane, 3.Intra Cellular	0.282382	1	4	ENSG00000127481	GENE-processed_transcript,protein_coding,retained_intron	23352	UBR4	UBR4			false	23352	331	0	1	ASSOCIATED_NEW_GENE	0	0.992322	false	0	23352	0		0	[A0A0A0MSW0, L0R6T5, Q5T4S7, Q5TBN9, Q96HY5, X6R960, X6RE05]	23352
			3.57406	0			3.Intra Cellular	3.Intra Cellular	0.279794	1	4	ENSG00000162402	GENE-nonsense_mediated_decay,processed_transcript,protein_coding,retained_intron	23358	USP24	USP24			false	23358	307	0	1	ASSOCIATED_NEW_GENE	0	0.992223	false	0	23358	0		0	[A0A0U1RQI9, A0A0U1RRH2, Q9UPU5]	23358
			3.5413	0			3.Intra Cellular	3.Intra Cellular	0.282382	1	4	ENSG00000155506	GENE-nonsense_mediated_decay,protein_coding,retained_intron	23367	LARP1	LARP1			false	23367	331	0	1	ASSOCIATED_NEW_GENE	0	0.992322	false	0	23367	0		0	[A0A0B4J210, E5RH50, E5RHK4, H0YAN4, H0YAX9, H0YBJ5, H0YBM7, H0YBR8, H0YBW1, H0YC33, H0YC73, Q6PKG0]	23367
			3.5413	0			3.Intra Cellular	3.Intra Cellular, 4.Nuclear Membrane	0.282382	1	4	ENSG00000055917	GENE-nonsense_mediated_decay,processed_transcript,protein_coding	23369	PUM2	PUM2			false	23369	331	0	1	ASSOCIATED_NEW_GENE	0	0.992322	false	0	23369	0		0	[A0A0C4DG68, B7ZL34, C9JE24, C9JW01, F2Z366, F8WD57, Q8TB72]	23369
			3.57406	0			3.Intra Cellular	3.Intra Cellular	0.279794	1	4	ENSG00000158467	GENE-processed_transcript,protein_coding,retained_intron	23382	AHCYL2	AHCYL2			false	23382	307	0	1	ASSOCIATED_NEW_GENE	0	0.992223	false	0	23382	0		0	[C9JZV7, C9K0S0, H0Y8B3, Q96HN2]	23382
			3.58362	0			0.Annotation definition not found in 'Homo Sapiens.properties' file	0.Annotation definition not found in 'Homo Sapiens.properties' file	0.279048	1	4	ENSG00000123066	GENE-nonsense_mediated_decay,processed_transcript,protein_coding,retained_intron	23389	MED13L	MED13L			false	23389	300	0	1	ASSOCIATED_NEW_GENE	0	0.992195	false	0	23389	0		0	[A0A3B3IRS4, A0A3B3IRX3, A0A3B3IS36, A0A3B3IS46, A0A3B3IS48, F8VRB8, H0YHC1, Q71F56]	23389
			3.5413	0	Transcription Factor Complex		1.Extracellular	1.Extracellular, 3.Intra Cellular	0.282382	1	4	ENSG00000101126	GENE-processed_transcript,protein_coding	23394	ADNP	ADNP			false	23394	331	0	1	ASSOCIATED_NEW_GENE	0	0.992322	false	0	23394	0		0	[A0A2R8Y6X0, A0A2R8YCL6, A0A669KBJ7, Q6DHZ8, Q9H2P0]	23394
			4.07235	0			3.Intra Cellular	3.Intra Cellular	0.245558	1	6	ENSG00000181274	GENE-protein_coding	23401	FRAT2	FRAT2			false	23401	46	0	1	ASSOCIATED_NEW_GENE	0	0.990718	false	0	23401	0		0	[O75474]	23401
			3.57406	0			1.Extracellular	1.Extracellular, 3.Intra Cellular	0.279794	1	4	ENSG00000100697	GENE-nonsense_mediated_decay,processed_transcript,protein_coding,retained_intron	23405	DICER1	DICER1			false	23405	307	0	1	ASSOCIATED_NEW_GENE	0	0.992223	false	0	23405	0		0	[A0A6Q8PFV4, A0A6Q8PH99, A0A6Q8PHG6, A0A7I2YBM0, A0A8F5XQU3, F6SZ09, H0YJZ6, Q5D0K5, Q9UPY3]	23405
			4.06689	0			1.Extracellular	1.Extracellular, 2.Plasma Membrane, 3.Intra Cellular	0.245888	1	6	ENSG00000119729	GENE-nonsense_mediated_decay,processed_transcript,protein_coding,retained_intron	23433	RHOQ	RHOQ			false	23433	108	0	1	ASSOCIATED_NEW_GENE	0	0.990734	false	0	23433	0		0	[D6W5A7, E5RFZ3, F8WET9, H0YB40, H0YB93, P17081, V9HWD0]	23433
			3.5413	0			5.Nucleus	5.Nucleus	0.282382	1	4	ENSG00000189091	GENE-nonsense_mediated_decay,processed_transcript,protein_coding,retained_intron	23450	SF3B3	SF3B3			false	23450	331	0	1	ASSOCIATED_NEW_GENE	0	0.992322	false	0	23450	0		0	[A8K6V3, H3BMB0, I3L4G7, J3QKV4, J3QL37, J3QRB2, Q15393]	23450
			3.99317	0			5.Nucleus	5.Nucleus	0.250427	1	6	ENSG00000115524	GENE-nonsense_mediated_decay,processed_transcript,protein_coding,retained_intron	23451	SF3B1	SF3B1			false	23451	109	0	1	ASSOCIATED_NEW_GENE	0	0.990957	false	0	23451	0		0	[A0A494C1M2, A0JLT9, A0PJH5, B4DGZ4, F8WC19, H7C341, O75533, Q32Q20, Q7Z497]	23451
			3.57406	0	Transcription Factor Complex		5.Nucleus	5.Nucleus	0.279794	1	4	ENSG00000094916	GENE-processed_transcript,protein_coding,retained_intron	23468	CBX5	CBX5			false	23468	307	0	1	ASSOCIATED_NEW_GENE	0	0.992223	false	0	23468	0		0	[F8VNY3, P45973, Q6I9T7, V9HWG0]	23468
			3.54676	0	Transcription Factor Complex		3.Intra Cellular	3.Intra Cellular	0.281948	1	4	ENSG00000135547	GENE-protein_coding	23493	HEY2	HEY2			false	23493	327	0	1	ASSOCIATED_NEW_GENE	0	0.992306	false	0	23493	0		0	[Q5TF93, Q9UBP5]	23493
			3.54676	0			3.Intra Cellular	3.Intra Cellular	0.281948	1	4	ENSG00000180901	GENE-nonsense_mediated_decay,processed_transcript,protein_coding,retained_intron	23510	KCTD2	KCTD2			false	23510	327	0	1	ASSOCIATED_NEW_GENE	0	0.992306	false	0	23510	0		0	[H0Y3B9, J3QSC8, Q14681, Q8IYY2]	23510
			3.5413	0			0.Annotation definition not found in 'Homo Sapiens.properties' file	0.Annotation definition not found in 'Homo Sapiens.properties' file	0.282382	1	4	ENSG00000167978	GENE-nonsense_mediated_decay,processed_transcript,protein_coding,retained_intron	23524	SRRM2	SRRM2			false	23524	331	0	1	ASSOCIATED_NEW_GENE	0	0.992322	false	0	23524	0		0	[A0A087X1W1, A0A140VK53, A0AUK8, I3L0N7, I3L182, I3L1C0, I3L1I8, I3L1W5, I3L3Q8, I3L4D8, I3L4U6, Q05BI2, Q05CV9, Q9UQ35]	23524
			3.58362	0			0.Annotation definition not found in 'Homo Sapiens.properties' file	0.Annotation definition not found in 'Homo Sapiens.properties' file	0.279048	1	4	ENSG00000162702	GENE-protein_coding	23528	ZNF281	ZNF281			false	23528	300	0	1	ASSOCIATED_NEW_GENE	0	0.992195	false	0	23528	0		0	[B3KMX4, Q9Y2X9]	23528
			3.54676	0	Transcription Factor Complex		3.Intra Cellular	3.Intra Cellular	0.281948	1	4	ENSG00000170345	GENE-processed_transcript,protein_coding	2353	FOS	FOS			false	2353	327	0	1	ASSOCIATED_NEW_GENE	0	0.992306	false	0	2353	0		0	[A0A0K0TMT5, A0A0K0TMT7, A0A0K0TMV9, G3V289, G3V2V7, G3V5J9, G3V5N7, G3V5N9, H0YJM3, P01100, Q6FG41]	2353
			3.5413	0			3.Intra Cellular	3.Intra Cellular	0.282382	1	4	ENSG00000112992	GENE-nonsense_mediated_decay,processed_transcript,protein_coding,retained_intron	23530	NNT	NNT			false	23530	331	0	1	ASSOCIATED_NEW_GENE	0	0.992322	false	0	23530	0		0	[A0A024R0C3, A0A590UJA4, A0A590UJI3, A0A590UJM2, A0A590UJM7, A0A590UJV8, A0A590UK15, A0A590UK29, A0A590UKC7, D6RAI5, D6RCR6, D6RHU2, E9PCX7, H0Y9R2, Q13423, Q2TB59, Q8N5H5]	23530
			3.5413	0			3.Intra Cellular	3.Intra Cellular	0.282382	1	4	ENSG00000064419	GENE-protein_coding	23534	TNPO3	TNPO3			false	23534	331	0	1	ASSOCIATED_NEW_GENE	0	0.992322	false	0	23534	0		0	[A0A024R794, B3KMX1, C9J7E5, E9PFH4, Q9Y5L0]	23534
			3.57406	0			3.Intra Cellular	3.Intra Cellular	0.279794	1	4	ENSG00000100320	GENE-nonsense_mediated_decay,protein_coding,retained_intron	23543	RBFOX2	RBFOX2			false	23543	307	0	1	ASSOCIATED_NEW_GENE	0	0.992223	false	0	23543	0		0	[A0A0G2JRA5, A0A0G2JRD1, A0A0G2JSB3, B0QYV1, B0QYY4, B0QYY6, B0QYY7, F8WSN4, O43251, S4R3K7, S4R469]	23543
			4.06689	0	Transcription Factor Complex		0.Annotation definition not found in 'Homo Sapiens.properties' file	0.Annotation definition not found in 'Homo Sapiens.properties' file	0.245888	1	6	ENSG00000075426	GENE-processed_transcript,protein_coding	2355	FOSL2	FOSL2			false	2355	108	0	1	ASSOCIATED_NEW_GENE	0	0.990734	false	0	2355	0		0	[C9JCN8, P15408, Q9H5M2]	2355
			3.5413	0			1.Extracellular	1.Extracellular, 3.Intra Cellular	0.282382	1	4	ENSG00000206395	GENE-processed_transcript,protein_coding,retained_intron	23564	DDAH2	DDAH2			false	23564	331	0	1	ASSOCIATED_NEW_GENE	0	0.992322	false	0	23564	0		0	[A0A140T971, H0Y7N1, O95865, Q5SRR8, Q5SSV3, V9HW53]	23564
			3.57406	0			2.Plasma Membrane	2.Plasma Membrane, 3.Intra Cellular	0.279794	1	4	ENSG00000171051	GENE-protein_coding	2357	FPR1	FPR1			false	2357	307	0	1	ASSOCIATED_NEW_GENE	0	0.992223	false	0	2357	0		0	[A0A024R4J1, M0QZT0, M0R315, P21462]	2357
			3.5413	0			1.Extracellular	1.Extracellular, 3.Intra Cellular	0.282382	1	4	ENSG00000153904	GENE-protein_coding	23576	DDAH1	DDAH1			false	23576	331	0	1	ASSOCIATED_NEW_GENE	0	0.992322	false	0	23576	0		0	[B2R644, B4DGT0, B4DYP1, B4E3V1, O94760]	23576
			3.57406	0			3.Intra Cellular	3.Intra Cellular	0.279794	1	4	ENSG00000123130	GENE-nonsense_mediated_decay,protein_coding,retained_intron	23597	ACOT9	ACOT9			false	23597	307	0	1	ASSOCIATED_NEW_GENE	0	0.992223	false	0	23597	0		0	[C9J7L8, F8WDI2, H7C5Q2, Q96EA2, Q9Y305]	23597
			3.5413	0			3.Intra Cellular	3.Intra Cellular	0.282382	1	4	ENSG00000145687	GENE-processed_transcript,protein_coding,retained_intron	23635	SSBP2	SSBP2			false	23635	331	0	1	ASSOCIATED_NEW_GENE	0	0.992322	false	0	23635	0		0	[A0A087X159, D6RAC5, H0Y9M5, H0Y9V4, P81877]	23635
			3.5413	0			3.Intra Cellular	3.Intra Cellular, 4.Nuclear Membrane	0.282382	1	4	ENSG00000213024	GENE-processed_transcript,protein_coding	23636	NUP62	NUP62			false	23636	331	0	1	ASSOCIATED_NEW_GENE	0	0.992322	false	0	23636	0		0	[A0A024QZF1, M0QX10, M0QX13, M0QX64, M0QXN5, M0QYY0, M0QZL5, M0R0B7, M0R1S1, M0R302, P37198]	23636
			4.07235	0			3.Intra Cellular	3.Intra Cellular	0.245558	1	6	ENSG00000087074	GENE-protein_coding	23645	PPP1R15A	PPP1R15A			false	23645	46	0	1	ASSOCIATED_NEW_GENE	0	0.990718	false	0	23645	0		0	[M0QXL1, O75807]	23645
			3.54676	0			2.Plasma Membrane	2.Plasma Membrane, 3.Intra Cellular	0.281948	1	4	ENSG00000151012	GENE-nonsense_mediated_decay,protein_coding	23657	SLC7A11	SLC7A11			false	23657	327	0	1	ASSOCIATED_NEW_GENE	0	0.992306	false	0	23657	0		0	[A0A346RCP0, A0A346RCR1, A0A346RDT0, A0A346RDU2, A0A346RDX7, A0A346RDX8, A0A346RDX9, A0A346RDY0, A0A346REH8, A0A346REM6, H0Y9F9, Q4W5A5, Q9UPY5]	23657
			3.57406	0			1.Extracellular	1.Extracellular, 2.Plasma Membrane, 3.Intra Cellular, 5.Nucleus	0.279794	1	4	ENSG00000135048	GENE-nonsense_mediated_decay,protein_coding,retained_intron	23670	CEMIP2	CEMIP2			false	23670	307	0	1	ASSOCIATED_NEW_GENE	0	0.992223	false	0	23670	0		0	[A0A024R229, B4E1B9, F5GZC1, F5H6B2, H3BLX9, H3BLY0, Q9UHN6]	23670
			3.54676	0			3.Intra Cellular	3.Intra Cellular	0.281948	1	4	ENSG00000180957	GENE-protein_coding,retained_intron	23760	PITPNB	PITPNB			false	23760	327	0	1	ASSOCIATED_NEW_GENE	0	0.992306	false	0	23760	0		0	[A0A0A0MSW4, B3KYB6, B3KYB7, P48739]	23760
			3.5413	0			1.Extracellular	1.Extracellular, 3.Intra Cellular	0.282382	1	4	ENSG00000128335	GENE-processed_transcript,protein_coding	23780	APOL2	APOL2			false	23780	331	0	1	ASSOCIATED_NEW_GENE	0	0.992322	false	0	23780	0		0	[A0A024R1M8, B0QYK8, E9PM95, J3KQL8, Q9BQE5]	23780
			3.5413	0			3.Intra Cellular	3.Intra Cellular	0.282382	1	4	ENSG00000099968	GENE-nonsense_mediated_decay,processed_transcript,protein_coding	23786	BCL2L13	BCL2L13			false	23786	331	0	1	ASSOCIATED_NEW_GENE	0	0.992322	false	0	23786	0		0	[A0A087WTL4, A0A087WW80, A0A087WX97, A0A0A0MR90, A8K5Y4, B2RB43, B7Z238, B7Z737, E9PDD6, F2Z2C3, F6VJB4, H0Y3R5, Q86T62, Q9BXK5]	23786
			3.57406	0			3.Intra Cellular	3.Intra Cellular	0.279794	1	4	ENSG00000165060	GENE-nonsense_mediated_decay,protein_coding	2395	FXN	FXN			false	2395	307	0	1	ASSOCIATED_NEW_GENE	0	0.992223	false	0	2395	0		0	[A0A0S2Z3G4, A0A0S2Z3Q8, C9JAX1, Q16595]	2395
			3.5413	0			3.Intra Cellular	3.Intra Cellular	0.282382	1	4	ENSG00000090889	GENE-processed_transcript,protein_coding	24137	KIF4A	KIF4A			false	24137	331	0	1	ASSOCIATED_NEW_GENE	0	0.992322	false	0	24137	0		0	[O95239, Q59HG1, Q6PKB2]	24137
			3.58362	0			0.Annotation definition not found in 'Homo Sapiens.properties' file	0.Annotation definition not found in 'Homo Sapiens.properties' file	0.279048	1	4	ENSG00000101161	GENE-protein_coding	24148	PRPF6	PRPF6			false	24148	300	0	1	ASSOCIATED_NEW_GENE	0	0.992195	false	0	24148	0		0	[O94906]	24148
			3.5413	0			1.Extracellular	1.Extracellular, 3.Intra Cellular	0.282382	1	4	ENSG00000211454	GENE-polymorphic_pseudogene,retained_intron	246181	AKR7L	AKR7L			false	246181	331	0	1	ASSOCIATED_NEW_GENE	0	0.992322	false	0	246181	0		0	[A0A499FJT0, Q8NHP1]	246181
			4.07099	0			3.Intra Cellular	3.Intra Cellular	0.245641	1	6	ENSG00000198793	GENE-processed_transcript,protein_coding	2475	MTOR	MTOR			false	2475	48	0	1	ASSOCIATED_NEW_GENE	0	0.990722	false	0	2475	0		0	[B1AKP8, B1AKQ2, P42345]	2475
			4.06689	0			1.Extracellular	1.Extracellular, 3.Intra Cellular	0.245888	1	6	ENSG00000087086	GENE-protein_coding	2512	FTL	FTL			false	2512	108	0	1	ASSOCIATED_NEW_GENE	0	0.990734	false	0	2512	0		0	[A0A384MDR3, B1Q387, B1Q3B3, B1Q3B4, M1KCE4, P02792, Q4FCH6, Q6DMM8, Q6S4P3]	2512
			3.58362	0			3.Intra Cellular	3.Intra Cellular	0.279048	1	4	ENSG00000196371	GENE-protein_coding	2526	FUT4	FUT4			false	2526	300	0	1	ASSOCIATED_NEW_GENE	0	0.992195	false	0	2526	0		0	[P22083]	2526
			3.5413	0			1.Extracellular	1.Extracellular, 3.Intra Cellular	0.282382	1	4	ENSG00000033170	GENE-nonsense_mediated_decay,processed_transcript,protein_coding	2530	FUT8	FUT8			false	2530	331	0	1	ASSOCIATED_NEW_GENE	0	0.992322	false	0	2530	0		0	[A0A669KAW1, A5PLL2, A8K8P8, G3V443, G3V4A8, G3V509, G3V530, G3V5E3, G3V5Z4, G3XAD2, Q546E0, Q9BYC5]	2530
			3.58362	0			0.Annotation definition not found in 'Homo Sapiens.properties' file	0.Annotation definition not found in 'Homo Sapiens.properties' file	0.279048	1	4	ENSG00000183530	GENE-nonsense_mediated_decay,processed_transcript,protein_coding	253143	PRR14L	PRR14L			false	253143	300	0	1	ASSOCIATED_NEW_GENE	0	0.992195	false	0	253143	0		0	[C9J9V0, H3BLU3, H7BZH1, H7C1B0, Q5THK1]	253143
			3.5413	0			3.Intra Cellular	3.Intra Cellular	0.282382	1	4	ENSG00000164327	GENE-nonsense_mediated_decay,processed_transcript,protein_coding,retained_intron	253260	RICTOR	RICTOR			false	253260	331	0	1	ASSOCIATED_NEW_GENE	0	0.992322	false	0	253260	0		0	[D6R9S6, Q6R327, Q8N6M7]	253260
			3.54676	0			3.Intra Cellular	3.Intra Cellular	0.281948	1	4	ENSG00000172954	GENE-nonsense_mediated_decay,processed_transcript,protein_coding	253558	LCLAT1	LCLAT1			false	253558	327	0	1	ASSOCIATED_NEW_GENE	0	0.992306	false	0	253558	0		0	[B4DM26, B4DYR5, C9J5S5, C9J6F4, C9JA02, C9JMW2, C9JUV9, C9JXY8, C9K0C3, F8WEY2, Q6UWP7]	253558
			3.54676	0			0.Annotation definition not found in 'Homo Sapiens.properties' file	0.Annotation definition not found in 'Homo Sapiens.properties' file	0.281948	1	4	ENSG00000165355	GENE-protein_coding	254170	FBXO33	FBXO33			false	254170	327	0	1	ASSOCIATED_NEW_GENE	0	0.992306	false	0	254170	0		0	[G3V3J7, Q7Z6M2]	254170
			3.5413	0			3.Intra Cellular	3.Intra Cellular, 5.Nucleus	0.282382	1	4	ENSG00000166439	GENE-protein_coding	254225	RNF169	RNF169			false	254225	331	0	1	ASSOCIATED_NEW_GENE	0	0.992322	false	0	254225	0		0	[H0YEQ1, Q8NCN4]	254225
			4.07099	0			2.Plasma Membrane	2.Plasma Membrane, 3.Intra Cellular	0.245641	1	6	ENSG00000168907	GENE-nonsense_mediated_decay,protein_coding,retained_intron	255189	PLA2G4F	PLA2G4F			false	255189	48	0	1	ASSOCIATED_NEW_GENE	0	0.990722	false	0	255189	0		0	[A2RRC4, A5PKZ7, A6H8K5, H3BMD0, H3BNW4, H3BPX7, H3BSG9, H7BXJ8, Q68DD2, Q8IUP3]	255189
			3.57406	0			3.Intra Cellular	3.Intra Cellular	0.279794	1	4	ENSG00000104064	GENE-protein_coding,retained_intron	2553	GABPB1	GABPB1			false	2553	307	0	1	ASSOCIATED_NEW_GENE	0	0.992223	false	0	2553	0		0	[A0A024R5R5, A0A024R5X6, F5H7I4, H0YMZ5, H0YNZ0, H9ZYI9, Q06547]	2553
			3.57406	0			3.Intra Cellular	3.Intra Cellular	0.279794	1	4	ENSG00000137393	GENE-processed_transcript,protein_coding	255488	RNF144B	RNF144B			false	255488	307	0	1	ASSOCIATED_NEW_GENE	0	0.992223	false	0	255488	0		0	[Q7Z419]	255488
			3.5413	0			2.Plasma Membrane	2.Plasma Membrane	0.282382	1	4	ENSG00000146047	GENE-protein_coding	255626	H2BC1	H2BC1			false	255626	331	0	1	ASSOCIATED_NEW_GENE	0	0.992322	false	0	255626	0		0	[Q96A08]	255626
			4.06689	0			3.Intra Cellular	3.Intra Cellular	0.245888	1	6	ENSG00000213123	GENE-nonsense_mediated_decay,processed_transcript,protein_coding,retained_intron	255758	DYNLT2B	DYNLT2B			false	255758	108	0	1	ASSOCIATED_NEW_GENE	0	0.990734	false	0	255758	0		0	[E7ER86, F8WD40, Q8WW35]	255758
			4.16655	0			2.Plasma Membrane	2.Plasma Membrane, 3.Intra Cellular	0.240007	1	6	ENSG00000163288	GENE-nonsense_mediated_decay,processed_transcript,protein_coding,retained_intron	2560	GABRB1	GABRB1			false	2560	58	0	1	ASSOCIATED_NEW_GENE	0	0.990433	false	0	2560	0		0	[D6REM0, P18505, X5DNL6]	2560
			3.54676	0			3.Intra Cellular	3.Intra Cellular	0.281948	1	4	ENSG00000175066	GENE-nonsense_mediated_decay,processed_transcript,protein_coding,retained_intron	256356	GK5	GK5			false	256356	327	0	1	ASSOCIATED_NEW_GENE	0	0.992306	false	0	256356	0		0	[F8WBF0, H7C4F2, H7C5R4, Q6ZS86]	256356
			3.54676	0			3.Intra Cellular	3.Intra Cellular	0.281948	1	4	ENSG00000166415	GENE-processed_transcript,protein_coding	256764	WDR72	WDR72			false	256764	327	0	1	ASSOCIATED_NEW_GENE	0	0.992306	false	0	256764	0		0	[A0A087WTC3, H0YKE0, H0YLX4, H0YN02, Q3MJ13]	256764
			4.06689	0			2.Plasma Membrane	2.Plasma Membrane, 3.Intra Cellular	0.245888	1	6	ENSG00000173548	GENE-protein_coding	257364	SNX33	SNX33			false	257364	108	0	1	ASSOCIATED_NEW_GENE	0	0.990734	false	0	257364	0		0	[H3BPR3, L8E981, Q8WV41]	257364
			3.5413	0			0.Annotation definition not found in 'Homo Sapiens.properties' file	0.Annotation definition not found in 'Homo Sapiens.properties' file	0.282382	1	4			25765	25765	25765			false	25765	331	0	1	ASSOCIATED_NEW_GENE	0	0.992322	false	0	25765	0		0		25765
			3.5413	0			2.Plasma Membrane	2.Plasma Membrane, 3.Intra Cellular	0.282382	1	4	ENSG00000118873	GENE-nonsense_mediated_decay,processed_transcript,protein_coding,retained_intron	25782	RAB3GAP2	RAB3GAP2			false	25782	331	0	1	ASSOCIATED_NEW_GENE	0	0.992322	false	0	25782	0		0	[F8WDJ2, H7C4Y9, Q9H2M9]	25782
			3.57406	0			2.Plasma Membrane	2.Plasma Membrane	0.279794	1	4	ENSG00000148337	GENE-processed_transcript,protein_coding,retained_intron	25792	CIZ1	CIZ1			false	25792	307	0	1	ASSOCIATED_NEW_GENE	0	0.992223	false	0	25792	0		0	[A0A024R885, A0A0U1RQR2, A0A494C0L7, B4E0A3, B7Z3U7, F5H2X7, F6VD24, F6WSM2, H0Y5D5, Q5SYW2, Q9BTG3, Q9ULV3]	25792
			3.99317	0			3.Intra Cellular	3.Intra Cellular	0.250427	1	6	ENSG00000100225	GENE-nonsense_mediated_decay,processed_transcript,protein_coding,retained_intron	25793	FBXO7	FBXO7			false	25793	109	0	1	ASSOCIATED_NEW_GENE	0	0.990957	false	0	25793	0		0	[A2A282, F8WBR0, F8WDR9, Q9Y3I1]	25793
			3.58362	0			1.Extracellular	1.Extracellular, 2.Plasma Membrane, 3.Intra Cellular	0.279048	1	4	ENSG00000130638	GENE-processed_transcript,protein_coding,retained_intron	25814	ATXN10	ATXN10			false	25814	300	0	1	ASSOCIATED_NEW_GENE	0	0.992195	false	0	25814	0		0	[A0A1W2PQD2, B1AHE3, B1AHE4, Q9UBB4]	25814
			3.58362	0			3.Intra Cellular	3.Intra Cellular	0.279048	1	4	ENSG00000145779	GENE-protein_coding	25816	TNFAIP8	TNFAIP8			false	25816	300	0	1	ASSOCIATED_NEW_GENE	0	0.992195	false	0	25816	0		0	[B3KUI2, D6RCM8, E5RIJ3, J3KQT8, O95379]	25816
			3.57406	0			3.Intra Cellular	3.Intra Cellular	0.279794	1	4	ENSG00000166233	GENE-nonsense_mediated_decay,processed_transcript,protein_coding,retained_intron	25820	ARIH1	ARIH1			false	25820	307	0	1	ASSOCIATED_NEW_GENE	0	0.992223	false	0	25820	0		0	[A0A087WT96, H3BNB9, H3BSK4, H3BUS0, Q9Y4X5]	25820
			3.57406	0			3.Intra Cellular	3.Intra Cellular	0.279794	1	4	ENSG00000143493	GENE-nonsense_mediated_decay,protein_coding,retained_intron	25896	INTS7	INTS7			false	25896	307	0	1	ASSOCIATED_NEW_GENE	0	0.992223	false	0	25896	0		0	[A0A087WXK3, A0A087WYC2, A0A087X0F3, A0A087X1Q0, D3DT96, Q9NVH2]	25896
			3.58362	0			3.Intra Cellular	3.Intra Cellular, 5.Nucleus	0.279048	1	4	ENSG00000134077	GENE-protein_coding,retained_intron	25917	THUMPD3	THUMPD3			false	25917	300	0	1	ASSOCIATED_NEW_GENE	0	0.992195	false	0	25917	0		0	[A0A024R2D3, C9J9V2, C9JP31, H7C0R6, H7C3J3, L8E880, Q9BV44]	25917
			3.58362	0			5.Nucleus	5.Nucleus	0.279048	1	4	ENSG00000130935	GENE-nonsense_mediated_decay,processed_transcript,protein_coding,retained_intron	25926	NOL11	NOL11			false	25926	300	0	1	ASSOCIATED_NEW_GENE	0	0.992195	false	0	25926	0		0	[J3QKV1, J3QLQ6, J3QR28, Q9H8H0]	25926
			3.5413	0	Transcription Factor Complex		3.Intra Cellular	3.Intra Cellular	0.282382	1	4	ENSG00000082516	GENE-protein_coding,retained_intron	25929	GEMIN5	GEMIN5			false	25929	331	0	1	ASSOCIATED_NEW_GENE	0	0.992322	false	0	25929	0		0	[B7ZLC9, L8E9U3, L8ECG2, Q58EZ8, Q8TEQ6]	25929
			4.16655	0			1.Extracellular	1.Extracellular, 2.Plasma Membrane, 3.Intra Cellular	0.240007	1	6	ENSG00000169504	GENE-nonsense_mediated_decay,processed_transcript,protein_coding	25932	CLIC4	CLIC4			false	25932	58	0	1	ASSOCIATED_NEW_GENE	0	0.990433	false	0	25932	0		0	[Q6FIC5, Q9Y696]	25932
			3.54676	0			1.Extracellular	1.Extracellular, 2.Plasma Membrane, 3.Intra Cellular	0.281948	1	4	ENSG00000127838	GENE-nonsense_mediated_decay,processed_transcript,protein_coding,retained_intron	25953	PNKD	PNKD			false	25953	327	0	1	ASSOCIATED_NEW_GENE	0	0.992306	false	0	25953	0		0	[A0A024R415, L8EAT5, Q8N490]	25953
			3.58362	0			1.Extracellular	1.Extracellular, 2.Plasma Membrane, 3.Intra Cellular, 4.Nuclear Membrane	0.279048	1	4	ENSG00000111640	GENE-protein_coding,retained_intron	2597	GAPDH	GAPDH			false	2597	300	0	1	ASSOCIATED_NEW_GENE	0	0.992195	false	0	2597	0		0	[E7EUT5, P04406, Q0QET7, V9HVZ4]	2597
			3.54676	0			1.Extracellular	1.Extracellular, 2.Plasma Membrane, 3.Intra Cellular	0.281948	1	4	ENSG00000083937	GENE-processed_transcript,protein_coding,retained_intron	25978	CHMP2B	CHMP2B			false	25978	327	0	1	ASSOCIATED_NEW_GENE	0	0.992306	false	0	25978	0		0	[A0A087WW88, B2RE76, C9J0A7, Q9UQN3]	25978
			3.5413	0			3.Intra Cellular	3.Intra Cellular	0.282382	1	4	ENSG00000108523	GENE-nonsense_mediated_decay,processed_transcript,protein_coding,retained_intron	26001	RNF167	RNF167			false	26001	331	0	1	ASSOCIATED_NEW_GENE	0	0.992322	false	0	26001	0		0	[I3L0L6, I3L0V7, I3L1K4, I3L2D4, I3L2Y3, I3L462, K7EN24, Q9H6Y7]	26001
			3.5413	0			3.Intra Cellular	3.Intra Cellular	0.282382	1	4	ENSG00000115806	GENE-nonsense_mediated_decay,processed_transcript,protein_coding,retained_intron	26003	GORASP2	GORASP2			false	26003	331	0	1	ASSOCIATED_NEW_GENE	0	0.992322	false	0	26003	0		0	[F8WBR9, F8WEG2, F8WEH9, F8WF79, Q9H8Y8]	26003
			3.54676	0			2.Plasma Membrane	2.Plasma Membrane, 3.Intra Cellular, 4.Nuclear Membrane	0.281948	1	4	ENSG00000070882	GENE-nonsense_mediated_decay,processed_transcript,protein_coding,retained_intron	26031	OSBPL3	OSBPL3			false	26031	327	0	1	ASSOCIATED_NEW_GENE	0	0.992306	false	0	26031	0		0	[C9J8P4, C9JEF2, C9JZ19, Q9H4L5]	26031
			3.54676	0			2.Plasma Membrane	2.Plasma Membrane, 3.Intra Cellular	0.281948	1	4	ENSG00000197555	GENE-processed_transcript,protein_coding,retained_intron	26037	SIPA1L1	SIPA1L1			false	26037	327	0	1	ASSOCIATED_NEW_GENE	0	0.992306	false	0	26037	0		0	[A6H8W6, F5GYF8, G3V4Z3, H0YJY2, O43166]	26037
			4.07099	0			2.Plasma Membrane	2.Plasma Membrane, 3.Intra Cellular	0.245641	1	6	ENSG00000174469	GENE-processed_transcript,protein_coding,retained_intron	26047	CNTNAP2	CNTNAP2			false	26047	48	0	1	ASSOCIATED_NEW_GENE	0	0.990722	false	0	26047	0		0	[A0A090N7T7, A0A0D9SES4, A0A0J9YWG3, A0A0J9YYA0, B2RCH4, B7Z1Y6, O75852, Q75LG9, Q75M92, Q75MA1, Q75MD4, Q75MF6, Q75MF8, Q75MQ9, Q86UI8, Q86UJ1, Q86UL4, Q86UL6, Q86UL9, Q96T77, Q96T78, Q96T79, Q96T80, Q9UDV4, Q9UHC6, X5D2E8, X5D7C2, X5D8X9, X5D9M6, X5DNH4, X5DQU5, X5DRL0]	26047
			3.58362	0			3.Intra Cellular	3.Intra Cellular, 4.Nuclear Membrane	0.279048	1	4	ENSG00000132466	GENE-processed_transcript,protein_coding,retained_intron	26057	ANKRD17	ANKRD17			false	26057	300	0	1	ASSOCIATED_NEW_GENE	0	0.992195	false	0	26057	0		0	[A0A1W2PQ15, H0YLQ3, H0YM23, O75179]	26057
			3.5413	0			3.Intra Cellular	3.Intra Cellular	0.282382	1	4	ENSG00000204120	GENE-nonsense_mediated_decay,processed_transcript,protein_coding,retained_intron	26058	GIGYF2	GIGYF2			false	26058	331	0	1	ASSOCIATED_NEW_GENE	0	0.992322	false	0	26058	0		0	[A0A7I2V361, A0A7I2V3H0, A0A7I2V3H7, A0A7I2V3X3, A0A7I2V516, A0A7I2YQP8, C9J0V6, C9JC65, C9JHT0, C9JHW1, C9JPV7, C9JRZ2, C9JW88, C9JXQ0, E7ESB6, F8WBF1, F8WCD5, I1E4Y6, Q6Y7W6]	26058
			3.5413	0			5.Nucleus	5.Nucleus	0.282382	1	4	ENSG00000203950	GENE-processed_transcript,protein_coding	26071	RTL8A	RTL8A			false	26071	331	0	1	ASSOCIATED_NEW_GENE	0	0.992322	false	0	26071	0		0	[Q9BWD3]	26071
			4.07235	0			2.Plasma Membrane	2.Plasma Membrane, 3.Intra Cellular	0.245558	1	6	ENSG00000004142	GENE-protein_coding	26073	POLDIP2	POLDIP2			false	26073	46	0	1	ASSOCIATED_NEW_GENE	0	0.990718	false	0	26073	0		0	[B4DEM9, L8EAT8, Q9Y2S7]	26073
			3.58362	0			4.Nuclear Membrane	4.Nuclear Membrane	0.279048	1	4	ENSG00000143337	GENE-nonsense_mediated_decay,processed_transcript,protein_coding	26092	TOR1AIP1	TOR1AIP1			false	26092	300	0	1	ASSOCIATED_NEW_GENE	0	0.992195	false	0	26092	0		0	[A0A0A0MSK5, H0Y4R4, H0YD16, H0YDJ8, H0YDU3, J3KN66, Q5JTV8]	26092
			3.54676	0			0.Annotation definition not found in 'Homo Sapiens.properties' file	0.Annotation definition not found in 'Homo Sapiens.properties' file	0.281948	1	4	ENSG00000119599	GENE-nonsense_mediated_decay,processed_transcript,protein_coding,retained_intron	26094	DCAF4	DCAF4			false	26094	327	0	1	ASSOCIATED_NEW_GENE	0	0.992306	false	0	26094	0		0	[B2RDD6, B4DN30, D6RCB5, G3V3D6, Q86SY2, Q8WV16]	26094
			3.57406	0			3.Intra Cellular	3.Intra Cellular, 5.Nucleus	0.279794	1	4	ENSG00000160679	GENE-processed_transcript,protein_coding	26097	CHTOP	CHTOP			false	26097	307	0	1	ASSOCIATED_NEW_GENE	0	0.992223	false	0	26097	0		0	[A0A087X1B7, Q5T7Y7, Q9Y3Y2, X6R700]	26097
			4.07099	0			0.Annotation definition not found in 'Homo Sapiens.properties' file	0.Annotation definition not found in 'Homo Sapiens.properties' file	0.245641	1	6	ENSG00000170921	GENE-protein_coding,retained_intron	26115	TANC2	TANC2			false	26115	48	0	1	ASSOCIATED_NEW_GENE	0	0.990722	false	0	26115	0		0	[J3KRP9, J3KTM5, J3QQY7, J3QRF0, Q9HCD6]	26115
			3.58362	0			3.Intra Cellular	3.Intra Cellular	0.279048	1	4	ENSG00000198954	GENE-nonsense_mediated_decay,processed_transcript,protein_coding,retained_intron	26128	KIFBP	KIFBP			false	26128	300	0	1	ASSOCIATED_NEW_GENE	0	0.992195	false	0	26128	0		0	[A0A0D9SFK7, A0A1B0GTE2, A0A1B0GTE6, A0A1B0GTX3, A0A1B0GU96, A0A1B0GUA3, A0A1B0GUH6, A0A1B0GVY9, A0A1B0GW21, A0A6Q8PGG2, A0A6Q8PH08, A0A6Q8PH45, A0A6Q8PHE6, A0A6Q8PHL8, Q96EK5]	26128
			3.5413	0			2.Plasma Membrane	2.Plasma Membrane, 3.Intra Cellular	0.282382	1	4	ENSG00000165219	GENE-nonsense_mediated_decay,processed_transcript,protein_coding,retained_intron	26130	GAPVD1	GAPVD1			false	26130	331	0	1	ASSOCIATED_NEW_GENE	0	0.992322	false	0	26130	0		0	[A0A024R862, A0A024R875, A0A024R8A2, A0A0A0MQV8, B0QZ65, B4DGD8, C9IZ08, C9IZX9, F8W9S7, H0Y4E7, H0Y7I9, Q14C86]	26130
			3.5413	0			2.Plasma Membrane	2.Plasma Membrane, 3.Intra Cellular	0.282382	1	4	ENSG00000135269	GENE-nonsense_mediated_decay,processed_transcript,protein_coding,retained_intron	26136	TES	TES			false	26136	331	0	1	ASSOCIATED_NEW_GENE	0	0.992322	false	0	26136	0		0	[A4D0U5, E0X098, F8W7T0, F8WDI4, H7BYK1, Q9UGI8]	26136
			3.5413	0			0.Annotation definition not found in 'Homo Sapiens.properties' file	0.Annotation definition not found in 'Homo Sapiens.properties' file	0.282382	1	4	ENSG00000119403	GENE-processed_transcript,protein_coding,retained_intron	26147	PHF19	PHF19			false	26147	331	0	1	ASSOCIATED_NEW_GENE	0	0.992322	false	0	26147	0		0	[A0A087X169, B0QZ50, B0QZ51, B0QZ72, B7Z887, B7Z8H3, F5H8K3, Q5T6S3, X6RER8]	26147
			3.5413	0			2.Plasma Membrane	2.Plasma Membrane	0.282382	1	4	ENSG00000180447	GENE-protein_coding	2619	GAS1	GAS1			false	2619	331	0	1	ASSOCIATED_NEW_GENE	0	0.992322	false	0	2619	0		0	[P54826]	2619
			3.57406	0			3.Intra Cellular	3.Intra Cellular	0.279794	1	4	ENSG00000119402	GENE-nonsense_mediated_decay,processed_transcript,protein_coding	26190	FBXW2	FBXW2			false	26190	307	0	1	ASSOCIATED_NEW_GENE	0	0.992223	false	0	26190	0		0	[B4DT60, L8EAL9, Q4VXH1, Q9UKT8]	26190
			3.54676	0			2.Plasma Membrane	2.Plasma Membrane, 3.Intra Cellular	0.281948	1	4	ENSG00000134242	GENE-nonsense_mediated_decay,processed_transcript,protein_coding,retained_intron	26191	PTPN22	PTPN22			false	26191	327	0	1	ASSOCIATED_NEW_GENE	0	0.992306	false	0	26191	0		0	[A0A0A0MTD9, A0A0A0MTE6, A0A0B4J1S7, A0A1S6KJG4, B4DZW8, E9PM87, E9PMK2, E9PMT0, F5H2S8, G3K0T4, Q9Y2R2]	26191
			3.57406	0			3.Intra Cellular	3.Intra Cellular	0.279794	1	4	ENSG00000123505	GENE-nonsense_mediated_decay,protein_coding,retained_intron	262	AMD1	AMD1			false	262	307	0	1	ASSOCIATED_NEW_GENE	0	0.992223	false	0	262	0		0	[A0A088AWN0, A0A5F9ZHD5, B4DZ60, F6R5I9, P17707, Q5VXN5, Q6N0B2]	262
			4.36724	0			2.Plasma Membrane	2.Plasma Membrane, 3.Intra Cellular	0.228978	1	6	ENSG00000166523	GENE-nonsense_mediated_decay,protein_coding,retained_intron	26253	CLEC4E	CLEC4E			false	26253	31	0	1	ASSOCIATED_NEW_GENE	0	0.989827	false	0	26253	0		0	[F5H5X7, F8WFA1, H0YGH9, Q9ULY5]	26253
			3.5413	0	Transcription Factor Complex		0.Annotation definition not found in 'Homo Sapiens.properties' file	0.Annotation definition not found in 'Homo Sapiens.properties' file	0.282382	1	4	ENSG00000136574	GENE-protein_coding,retained_intron	2626	GATA4	GATA4			false	2626	331	0	1	ASSOCIATED_NEW_GENE	0	0.992322	false	0	2626	0		0	[A0A087WZ09, A9Z1I4, B0LXE8, B0LXE9, B0LXF0, B0LXF1, B0LXF2, B0LXF3, B0LXF4, B0LXF5, B0LXF6, B2ZBW1, B2ZBW2, B3KUF4, B6DU75, E9PKS4, P43694, R4GND5]	2626
			3.57406	0			3.Intra Cellular	3.Intra Cellular	0.279794	1	4	ENSG00000110429	GENE-nonsense_mediated_decay,processed_transcript,protein_coding,retained_intron	26273	FBXO3	FBXO3			false	26273	307	0	1	ASSOCIATED_NEW_GENE	0	0.992223	false	0	26273	0		0	[B4E3U2, E9PJM3, E9PL46, G3V1E0, Q49AF1, Q9UK99]	26273
			3.5413	0			1.Extracellular	1.Extracellular	0.282382	1	4	ENSG00000117215	GENE-protein_coding	26279	PLA2G2D	PLA2G2D			false	26279	331	0	1	ASSOCIATED_NEW_GENE	0	0.992322	false	0	26279	0		0	[Q9UNK4]	26279
			3.54676	0			1.Extracellular	1.Extracellular, 3.Intra Cellular	0.281948	1	4	ENSG00000187210	GENE-processed_transcript,protein_coding	2650	GCNT1	GCNT1			false	2650	327	0	1	ASSOCIATED_NEW_GENE	0	0.992306	false	0	2650	0		0	[L8E8T5, Q02742, Q86T81]	2650
			3.5413	0			1.Extracellular	1.Extracellular, 2.Plasma Membrane, 3.Intra Cellular, 4.Nuclear Membrane	0.282382	1	4	ENSG00000138119	GENE-nonsense_mediated_decay,processed_transcript,protein_coding,retained_intron	26509	MYOF	MYOF			false	26509	331	0	1	ASSOCIATED_NEW_GENE	0	0.992322	false	0	26509	0		0	[H0YD14, Q9NZM1]	26509
			3.54676	0			2.Plasma Membrane	2.Plasma Membrane	0.281948	1	4	ENSG00000204694	GENE-protein_coding	26531	OR11A1	OR11A1			false	26531	327	0	1	ASSOCIATED_NEW_GENE	0	0.992306	false	0	26531	0		0	[A0A024RCH9, A2RRF6, Q9GZK7]	26531
			3.58362	0			3.Intra Cellular	3.Intra Cellular	0.279048	1	4	ENSG00000106638	GENE-nonsense_mediated_decay,processed_transcript,protein_coding,retained_intron	26608	TBL2	TBL2			false	26608	300	0	1	ASSOCIATED_NEW_GENE	0	0.992195	false	0	26608	0		0	[A0A087WXC6, A0A0S2Z5C1, A0A0S2Z5F3, A0A384MDS4, E9PF19, F2Z3G3, F8WB62, F8WBD9, F8WBP2, F8WCC7, F8WCR3, F8WDI9, F8WEC3, Q96E41, Q9Y4P3]	26608
			3.5413	0			3.Intra Cellular	3.Intra Cellular	0.282382	1	4	ENSG00000203879	GENE-nonsense_mediated_decay,processed_transcript,protein_coding,retained_intron	2664	GDI1	GDI1			false	2664	331	0	1	ASSOCIATED_NEW_GENE	0	0.992322	false	0	2664	0		0	[A0A0S2Z3X8, A0A0S2Z426, F8WCU0, F8WE59, G5E9U5, L8EC88, P31150]	2664
			3.54676	0			3.Intra Cellular	3.Intra Cellular	0.281948	1	4		GENE-ncRNA	266553	OFCC1	OFCC1			false	266553	327	0	1	ASSOCIATED_NEW_GENE	0	0.992306	false	0	266553	0		0	[B7ZLI9, Q8IZS5]	266553
			3.58362	0			2.Plasma Membrane	2.Plasma Membrane, 3.Intra Cellular	0.279048	1	4	ENSG00000152661	GENE-protein_coding	2697	GJA1	GJA1			false	2697	300	0	1	ASSOCIATED_NEW_GENE	0	0.992195	false	0	2697	0		0	[A0A654IBU3, P17302]	2697
			3.54676	0			1.Extracellular	1.Extracellular, 3.Intra Cellular	0.281948	1	4	ENSG00000070756	GENE-nonsense_mediated_decay,processed_transcript,protein_coding,retained_intron	26986	PABPC1	PABPC1			false	26986	327	0	1	ASSOCIATED_NEW_GENE	0	0.992306	false	0	26986	0		0	[A0A024R9C1, A0A024R9E2, A0A087WTT1, A0A7I2V3J9, A0A7I2V4N4, A0A7I2V649, A0A7I2YQ88, A0A7I2YQ90, A0A7I2YQE4, E5RFD8, E5RGC4, E5RGH3, E5RH24, E5RHG7, E5RJB9, E5RJM8, E7EQV3, E7ERJ7, H0YAP2, H0YAR2, H0YAS6, H0YAS7, H0YAW6, H0YB75, H0YB86, H0YBN4, H0YC10, P11940]	26986
			3.54676	0	Transcription Factor Complex		3.Intra Cellular	3.Intra Cellular, 5.Nucleus	0.281948	1	4	ENSG00000148677	GENE-protein_coding	27063	ANKRD1	ANKRD1			false	27063	327	0	1	ASSOCIATED_NEW_GENE	0	0.992306	false	0	27063	0		0	[A0A384NYH5, A0A7R6M6R9, Q05DQ9, Q15327]	27063
			3.58362	0			1.Extracellular	1.Extracellular, 3.Intra Cellular	0.279048	1	4	ENSG00000165678	GENE-protein_coding,retained_intron	27069	GHITM	GHITM			false	27069	300	0	1	ASSOCIATED_NEW_GENE	0	0.992195	false	0	27069	0		0	[Q6FIA7, Q9H3K2]	27069
			3.57406	0			0.Annotation definition not found in 'Homo Sapiens.properties' file	0.Annotation definition not found in 'Homo Sapiens.properties' file	0.279794	1	4	ENSG00000166133	GENE-protein_coding	27079	RPUSD2	RPUSD2			false	27079	307	0	1	ASSOCIATED_NEW_GENE	0	0.992223	false	0	27079	0		0	[A0A087WXE2, Q8IZ73]	27079
			3.5413	0			3.Intra Cellular	3.Intra Cellular	0.282382	1	4	ENSG00000114861	GENE-nonsense_mediated_decay,processed_transcript,protein_coding,retained_intron	27086	FOXP1	FOXP1			false	27086	331	0	1	ASSOCIATED_NEW_GENE	0	0.992322	false	0	27086	0		0	[A0A087WVT2, A0A087X2G3, A0A0B4J2F3, A0A3B3IRL7, A0A3B3IRS5, A0A3B3IRW5, A0A3B3IRY1, A0A3B3IS87, A0A3B3ISA4, A0A3B3ISQ3, A0A3B3ISQ6, A0A3B3ISQ7, A0A3B3IST0, A0A3B3IST6, A0A3B3IT14, A0A3B3IT26, A0A3B3IT66, A0A3B3ITZ4, A0A3B3IU08, A0A3B3IU15, A0A3B3IUB6, A3KMG1, C9IYY1, C9J0F0, C9J5T4, G5E965, H0Y882, Q548T7, Q6IAJ1, Q8N2P0, Q8TEA2, Q9H334]	27086
			3.54676	0			5.Nucleus	5.Nucleus	0.281948	1	4	ENSG00000072364	GENE-processed_transcript,protein_coding,retained_intron	27125	AFF4	AFF4			false	27125	327	0	1	ASSOCIATED_NEW_GENE	0	0.992306	false	0	27125	0		0	[C9JCE0, H7C319, L8E815, Q8TAX5, Q9UHB7]	27125
			3.57406	0			0.Annotation definition not found in 'Homo Sapiens.properties' file	0.Annotation definition not found in 'Homo Sapiens.properties' file	0.279794	1	4	ENSG00000256463	GENE-processed_transcript,protein_coding	27164	SALL3	SALL3			false	27164	307	0	1	ASSOCIATED_NEW_GENE	0	0.992223	false	0	27164	0		0	[A0A087WXW6, A0A140TA70, A0A140TA74, A0A384MEH2, A9JR48, I3L3L8, Q9BXA9]	27164
			4.06689	0			3.Intra Cellular	3.Intra Cellular	0.245888	1	6	ENSG00000169230	GENE-nonsense_mediated_decay,processed_transcript,protein_coding,retained_intron	27166	PRELID1	PRELID1			false	27166	108	0	1	ASSOCIATED_NEW_GENE	0	0.990734	false	0	27166	0		0	[D6RC47, D6REW1, H0YA79, Q9Y255]	27166
			3.57406	0			3.Intra Cellular	3.Intra Cellular	0.279794	1	4	ENSG00000162946	GENE-nonsense_mediated_decay,processed_transcript,protein_coding,retained_intron	27185	DISC1	DISC1			false	27185	307	0	1	ASSOCIATED_NEW_GENE	0	0.992223	false	0	27185	0		0	[A0A087WYX6, A7E2W8, C4P092, C4P093, C4P094, C4P096, C4P098, C4P0A0, C4P0A4, C4P0A5, C4P0A9, C4P0B0, C4P0B1, C4P0B2, C4P0C4, C4P0C7, C4P0C8, C4P0D0, C4P0D1, C4P0D2, C4P0D3, H0Y7U2, Q9NRI5, X5DQV8]	27185
			3.54676	0			2.Plasma Membrane	2.Plasma Membrane	0.281948	1	4	ENSG00000155269	GENE-nonsense_mediated_decay,processed_transcript,protein_coding,retained_intron	27201	GPR78	GPR78			false	27201	327	0	1	ASSOCIATED_NEW_GENE	0	0.992306	false	0	27201	0		0	[B2R7M4, D6RB95, L8E9J7, Q96P69]	27201
			3.99317	0			3.Intra Cellular	3.Intra Cellular	0.250427	1	6	ENSG00000120742	GENE-processed_transcript,protein_coding	27230	SERP1	SERP1			false	27230	109	0	1	ASSOCIATED_NEW_GENE	0	0.990957	false	0	27230	0		0	[C9JSB0, C9JUH5, Q9Y6X1]	27230
			3.54676	0			2.Plasma Membrane	2.Plasma Membrane, 3.Intra Cellular	0.281948	1	4	ENSG00000077009	GENE-nonsense_mediated_decay,protein_coding	27231	NMRK2	NMRK2			false	27231	327	0	1	ASSOCIATED_NEW_GENE	0	0.992306	false	0	27231	0		0	[M0QX67, M0R0T8, Q9NPI5]	27231
			3.58362	0			3.Intra Cellular	3.Intra Cellular	0.279048	1	4	ENSG00000164144	GENE-processed_transcript,protein_coding	27236	ARFIP1	ARFIP1			false	27236	300	0	1	ASSOCIATED_NEW_GENE	0	0.992195	false	0	27236	0		0	[B4E273, B7ZA10, P53367, Q8N8M9]	27236
			4.07099	0			1.Extracellular	1.Extracellular, 2.Plasma Membrane	0.245641	1	6	ENSG00000130768	GENE-nonsense_mediated_decay,processed_transcript,protein_coding	27293	SMPDL3B	SMPDL3B			false	27293	48	0	1	ASSOCIATED_NEW_GENE	0	0.990722	false	0	27293	0		0	[B4DEC6, B4DW34, F8VWW8, F8VXS3, Q5T0Y8, Q92485]	27293
			3.5413	0			3.Intra Cellular	3.Intra Cellular, 4.Nuclear Membrane	0.282382	1	4	ENSG00000223566	GENE-unprocessed_pseudogene	27320	TNRC18P2	TNRC18P2			false	27320	331	0	1	ASSOCIATED_NEW_GENE	0	0.992322	false	0	27320	0		0		27320
			3.5413	0			3.Intra Cellular	3.Intra Cellular	0.282382	1	4	ENSG00000108106	GENE-processed_transcript,protein_coding	27338	UBE2S	UBE2S			false	27338	331	0	1	ASSOCIATED_NEW_GENE	0	0.992322	false	0	27338	0		0	[K7EM75, K7EPJ1, Q16763, Q6NXQ4]	27338
			4.36724	0			0.Annotation definition not found in 'Homo Sapiens.properties' file	0.Annotation definition not found in 'Homo Sapiens.properties' file	0.228978	1	6	ENSG00000166169	GENE-processed_transcript,protein_coding	27343	POLL	POLL			false	27343	31	0	1	ASSOCIATED_NEW_GENE	0	0.989827	false	0	27343	0		0	[A8K860, B4DE17, Q5JQN9, Q5JQP0, Q5JQP1, Q5JQP2, Q5JQP3, Q5JQP4, Q5JQP7, Q5JQP8, Q5ZEY5, Q5ZEY6, Q9HBN3, Q9UGP5]	27343
			3.57406	0			1.Extracellular	1.Extracellular, 2.Plasma Membrane, 3.Intra Cellular	0.279794	1	4	ENSG00000124767	GENE-processed_transcript,protein_coding	2739	GLO1	GLO1			false	2739	307	0	1	ASSOCIATED_NEW_GENE	0	0.992223	false	0	2739	0		0	[Q04760, X5DNM4]	2739
			3.99317	0			1.Extracellular	1.Extracellular, 3.Intra Cellular	0.250427	1	6	ENSG00000186472	GENE-nonsense_mediated_decay,processed_transcript,protein_coding	27445	PCLO	PCLO			false	27445	109	0	1	ASSOCIATED_NEW_GENE	0	0.990957	false	0	27445	0		0	[E9PE96, H7C114, H7C261, L8E9M5, Q32P40, Q9Y6V0]	27445
			4.16655	0			1.Extracellular	1.Extracellular, 2.Plasma Membrane, 3.Intra Cellular	0.240007	1	6	ENSG00000135821	GENE-processed_transcript,protein_coding	2752	GLUL	GLUL			false	2752	58	0	1	ASSOCIATED_NEW_GENE	0	0.990433	false	0	2752	0		0	[A0A2R8YDT1, A1L199, A8YXX4, P15104]	2752
			3.5413	0			0.Annotation definition not found in 'Homo Sapiens.properties' file	0.Annotation definition not found in 'Homo Sapiens.properties' file	0.282382	1	4	ENSG00000197045	GENE-nonsense_mediated_decay,processed_transcript,protein_coding,retained_intron	2764	GMFB	GMFB			false	2764	331	0	1	ASSOCIATED_NEW_GENE	0	0.992322	false	0	2764	0		0	[G3V3X4, G3V4P8, P60983]	2764
			3.58362	0			2.Plasma Membrane	2.Plasma Membrane, 3.Intra Cellular	0.279048	1	4	ENSG00000146535	GENE-processed_transcript,protein_coding	2768	GNA12	GNA12			false	2768	300	0	1	ASSOCIATED_NEW_GENE	0	0.992195	false	0	2768	0		0	[C9J2Y7, E9PC54, Q03113, Q6ZQV4]	2768
			3.54676	0			1.Extracellular	1.Extracellular, 2.Plasma Membrane, 3.Intra Cellular	0.281948	1	4	ENSG00000065135	GENE-protein_coding	2773	GNAI3	GNAI3			false	2773	327	0	1	ASSOCIATED_NEW_GENE	0	0.992306	false	0	2773	0		0	[P08754]	2773
			3.57406	0			1.Extracellular	1.Extracellular, 2.Plasma Membrane	0.279794	1	4	ENSG00000174021	GENE-processed_transcript,protein_coding	2787	GNG5	GNG5			false	2787	307	0	1	ASSOCIATED_NEW_GENE	0	0.992223	false	0	2787	0		0	[P63218]	2787
			3.54676	0			3.Intra Cellular	3.Intra Cellular	0.281948	1	4	ENSG00000136935	GENE-nonsense_mediated_decay,protein_coding,retained_intron	2800	GOLGA1	GOLGA1			false	2800	327	0	1	ASSOCIATED_NEW_GENE	0	0.992306	false	0	2800	0		0	[A0A024R869, H0YE54, Q5T165, Q92805, R4GNH1]	2800
			3.57406	0			1.Extracellular	1.Extracellular, 2.Plasma Membrane, 3.Intra Cellular	0.279794	1	4	ENSG00000144674	GENE-processed_transcript,protein_coding,retained_intron	2803	GOLGA4	GOLGA4			false	2803	307	0	1	ASSOCIATED_NEW_GENE	0	0.992223	false	0	2803	0		0	[A0A087WTW2, C9J0Y3, C9JHJ5, E7EVX2, H0Y6I0, Q13439, Q49A56, Q86W71]	2803
			3.54676	0			1.Extracellular	1.Extracellular, 3.Intra Cellular	0.281948	1	4	ENSG00000120053	GENE-processed_transcript,protein_coding	2805	GOT1	GOT1			false	2805	327	0	1	ASSOCIATED_NEW_GENE	0	0.992306	false	0	2805	0		0	[A0A140VK69, P17174]	2805
			3.5413	0			1.Extracellular	1.Extracellular, 3.Intra Cellular	0.282382	1	4	ENSG00000175793	GENE-protein_coding	2810	SFN	SFN			false	2810	331	0	1	ASSOCIATED_NEW_GENE	0	0.992322	false	0	2810	0		0	[P31947]	2810
			3.5413	0			1.Extracellular	1.Extracellular, 2.Plasma Membrane, 3.Intra Cellular	0.282382	1	4	ENSG00000105220	GENE-nonsense_mediated_decay,processed_transcript,protein_coding,retained_intron	2821	GPI	GPI			false	2821	331	0	1	ASSOCIATED_NEW_GENE	0	0.992322	false	0	2821	0		0	[A0A0G2JLI6, A0A0J9YX90, A0A0J9YXH9, A0A0J9YXM3, A0A0J9YXP8, A0A0J9YYH3, A0A0J9YYI8, A0A2R8Y6C7, A0A2R8YF08, A0A2U3TZU2, B4DE36, K7EIL4, K7ELR7, K7ENA0, K7EP41, K7EPY4, K7EQ48, K7ERC6, K7ERK8, P06744]	2821
			4.16655	0			2.Plasma Membrane	2.Plasma Membrane	0.240007	1	6	ENSG00000176463	GENE-nonsense_mediated_decay,processed_transcript,protein_coding,retained_intron	28232	SLCO3A1	SLCO3A1			false	28232	58	0	1	ASSOCIATED_NEW_GENE	0	0.990433	false	0	28232	0		0	[G3V2B7, G3V3K4, H0YJM0, Q9UIG8]	28232
			3.57406	0			3.Intra Cellular	3.Intra Cellular	0.279794	1	4	ENSG00000165434	GENE-TEC,protein_coding	283209	PGM2L1	PGM2L1			false	283209	307	0	1	ASSOCIATED_NEW_GENE	0	0.992223	false	0	283209	0		0	[Q6PCE3]	283209
			3.57406	0			0.Annotation definition not found in 'Homo Sapiens.properties' file	0.Annotation definition not found in 'Homo Sapiens.properties' file	0.279794	1	4	ENSG00000188997	GENE-protein_coding	283219	KCTD21	KCTD21			false	283219	307	0	1	ASSOCIATED_NEW_GENE	0	0.992223	false	0	283219	0		0	[E9PJJ5, E9PK99, E9PM10, E9PMS5, E9PRT1, Q4G0X4]	283219
			3.57406	0			0.Annotation definition not found in 'Homo Sapiens.properties' file	0.Annotation definition not found in 'Homo Sapiens.properties' file	0.279794	1	4	ENSG00000176422	GENE-protein_coding	283377	SPRYD4	SPRYD4			false	283377	307	0	1	ASSOCIATED_NEW_GENE	0	0.992223	false	0	283377	0		0	[Q8WW59]	283377
			4.07099	0			0.Annotation definition not found in 'Homo Sapiens.properties' file	0.Annotation definition not found in 'Homo Sapiens.properties' file	0.245641	1	6	ENSG00000161682	GENE-nonsense_mediated_decay,protein_coding,retained_intron	284069	FAM171A2	FAM171A2			false	284069	48	0	1	ASSOCIATED_NEW_GENE	0	0.990722	false	0	284069	0		0	[A8MVW0, K7EMG4, Q8N0U1]	284069
			4.07235	0			3.Intra Cellular	3.Intra Cellular	0.245558	1	6	ENSG00000274768	GENE-processed_transcript,protein_coding,retained_intron	284106	CISD3	CISD3			false	284106	46	0	1	ASSOCIATED_NEW_GENE	0	0.990718	false	0	284106	0		0	[P0C7P0]	284106
			3.54676	0			3.Intra Cellular	3.Intra Cellular	0.281948	1	4	ENSG00000180011	GENE-protein_coding	284273	PTGR3	PTGR3			false	284273	327	0	1	ASSOCIATED_NEW_GENE	0	0.992306	false	0	284273	0		0	[Q4G1C4, Q8N4Q0]	284273
			3.58362	0			0.Annotation definition not found in 'Homo Sapiens.properties' file	0.Annotation definition not found in 'Homo Sapiens.properties' file	0.279048	1	4	ENSG00000171649	GENE-processed_transcript,protein_coding	284307	ZIK1	ZIK1			false	284307	300	0	1	ASSOCIATED_NEW_GENE	0	0.992195	false	0	284307	0		0	[B3KS08, B3KY01, F5H435, M0QYP0, M0QYQ8, M0R1S7, Q3SY52, X6R413]	284307
			3.54676	0			0.Annotation definition not found in 'Homo Sapiens.properties' file	0.Annotation definition not found in 'Homo Sapiens.properties' file	0.281948	1	4	ENSG00000223547	GENE-protein_coding	284391	ZNF844	ZNF844			false	284391	327	0	1	ASSOCIATED_NEW_GENE	0	0.992306	false	0	284391	0		0	[A0A494C069, B4DSG8, F8VS19, F8WE48, Q08AG5]	284391
			3.58362	0			0.Annotation definition not found in 'Homo Sapiens.properties' file	0.Annotation definition not found in 'Homo Sapiens.properties' file	0.279048	1	4	ENSG00000174151	GENE-protein_coding	284613	CYB561D1	CYB561D1			false	284613	300	0	1	ASSOCIATED_NEW_GENE	0	0.992195	false	0	284613	0		0	[B4DR38, B4E0W0, E9PIJ2, E9PIK3, E9PM70, E9PQU0, Q6ZQS1, Q8N8Q1]	284613
			3.99317	0			3.Intra Cellular	3.Intra Cellular	0.250427	1	6	ENSG00000168256	GENE-nonsense_mediated_decay,protein_coding,retained_intron	28511	NKIRAS2	NKIRAS2			false	28511	109	0	1	ASSOCIATED_NEW_GENE	0	0.990957	false	0	28511	0		0	[A0A024R1Z4, A0A0A0MTA0, H7BXP1, K7EKE9, K7ELL8, K7ER26, K7ERG2, Q9NYR9]	28511
			3.58362	0			0.Annotation definition not found in 'Homo Sapiens.properties' file	0.Annotation definition not found in 'Homo Sapiens.properties' file	0.279048	1	4	ENSG00000243197	GENE-lncRNA	285194	TUSC7	TUSC7			false	285194	300	0	1	ASSOCIATED_NEW_GENE	0	0.992195	false	0	285194	0		0		285194
			3.54676	0			2.Plasma Membrane	2.Plasma Membrane	0.281948	1	4	ENSG00000185477	GENE-protein_coding	285513	GPRIN3	GPRIN3			false	285513	327	0	1	ASSOCIATED_NEW_GENE	0	0.992306	false	0	285513	0		0	[A0AVI5, Q6ZVF9]	285513
			3.57406	0			3.Intra Cellular	3.Intra Cellular	0.279794	1	4	ENSG00000205765	GENE-processed_transcript,protein_coding,retained_intron	285636	RIMOC1	RIMOC1			false	285636	307	0	1	ASSOCIATED_NEW_GENE	0	0.992223	false	0	285636	0		0	[A6NDU8]	285636
			3.57406	0			0.Annotation definition not found in 'Homo Sapiens.properties' file	0.Annotation definition not found in 'Homo Sapiens.properties' file	0.279794	1	4	ENSG00000153006	GENE-processed_transcript,protein_coding,retained_intron	285672	SREK1IP1	SREK1IP1			false	285672	307	0	1	ASSOCIATED_NEW_GENE	0	0.992223	false	0	285672	0		0	[Q8N9Q2]	285672
			3.58362	0			3.Intra Cellular	3.Intra Cellular	0.279048	1	4	ENSG00000183137	GENE-nonsense_mediated_decay,processed_transcript,protein_coding,retained_intron	285753	CEP57L1	CEP57L1			false	285753	300	0	1	ASSOCIATED_NEW_GENE	0	0.992195	false	0	285753	0		0	[E5RFY4, E5RG21, E5RG82, E5RGP2, E5RGU5, E5RH23, E5RHF8, E5RI49, E5RIK8, E5RIV2, E5RJG4, E5RJH1, E5RJP9, E5RK85, G3V140, H0YB52, Q5T6A0, Q6P2R3, Q8IYX8]	285753
			3.54676	0			0.Annotation definition not found in 'Homo Sapiens.properties' file	0.Annotation definition not found in 'Homo Sapiens.properties' file	0.281948	1	4	ENSG00000198680	GENE-protein_coding	286319	TUSC1	TUSC1			false	286319	327	0	1	ASSOCIATED_NEW_GENE	0	0.992306	false	0	286319	0		0	[Q2TAM9]	286319
			3.58362	0			3.Intra Cellular	3.Intra Cellular	0.279048	1	4	ENSG00000213186	GENE-protein_coding	286827	TRIM59	TRIM59			false	286827	300	0	1	ASSOCIATED_NEW_GENE	0	0.992195	false	0	286827	0		0	[C9IY67, C9IZE0, C9J614, C9J9F0, C9JE08, C9JNB9, F5GZP3, Q8IWR1]	286827
			3.5413	0			1.Extracellular	1.Extracellular, 2.Plasma Membrane, 3.Intra Cellular, 5.Nucleus	0.282382	1	4	ENSG00000177885	GENE-nonsense_mediated_decay,processed_transcript,protein_coding,retained_intron	2885	GRB2	GRB2			false	2885	331	0	1	ASSOCIATED_NEW_GENE	0	0.992322	false	0	2885	0		0	[B0LPF3, J3KT38, J3QLF6, J3QRL5, P62993, Q6ICN0]	2885
			3.5413	0			2.Plasma Membrane	2.Plasma Membrane	0.282382	1	4	ENSG00000063127	GENE-protein_coding,retained_intron	28968	SLC6A16	SLC6A16			false	28968	331	0	1	ASSOCIATED_NEW_GENE	0	0.992322	false	0	28968	0		0	[M0QYK3, M0QZL4, M0R1Y6, M0R2R5, Q9GZN6]	28968
			3.57406	0			0.Annotation definition not found in 'Homo Sapiens.properties' file	0.Annotation definition not found in 'Homo Sapiens.properties' file	0.279794	1	4	ENSG00000104979	GENE-nonsense_mediated_decay,protein_coding	28974	C19orf53	C19orf53			false	28974	307	0	1	ASSOCIATED_NEW_GENE	0	0.992223	false	0	28974	0		0	[A0A0A0MQS3, K7EIU1, K7EN09, K7ESE5, Q9UNZ5]	28974
			3.54676	0			3.Intra Cellular	3.Intra Cellular	0.281948	1	4	ENSG00000096092	GENE-protein_coding	28978	TMEM14A	TMEM14A			false	28978	327	0	1	ASSOCIATED_NEW_GENE	0	0.992306	false	0	28978	0		0	[L0R8I9, Q9Y6G1]	28978
			3.54676	0	Transcription Factor Complex		3.Intra Cellular	3.Intra Cellular	0.281948	1	4	ENSG00000064393	GENE-protein_coding	28996	HIPK2	HIPK2			false	28996	327	0	1	ASSOCIATED_NEW_GENE	0	0.992306	false	0	28996	0		0	[A4D1R9, H7BXX9, L8ECJ8, Q9H2X6]	28996
			4.06689	0			0.Annotation definition not found in 'Homo Sapiens.properties' file	0.Annotation definition not found in 'Homo Sapiens.properties' file	0.245888	1	6	ENSG00000163884	GENE-processed_transcript,protein_coding	28999	KLF15	KLF15			false	28999	108	0	1	ASSOCIATED_NEW_GENE	0	0.990734	false	0	28999	0		0	[Q9UIH9]	28999
			3.5413	0			3.Intra Cellular	3.Intra Cellular	0.282382	1	4	ENSG00000178719	GENE-protein_coding,retained_intron	2907	GRINA	GRINA			false	2907	331	0	1	ASSOCIATED_NEW_GENE	0	0.992322	false	0	2907	0		0	[E9PPG3, E9PQF8, H0YC98, H0YCP9, H0YEI4, Q7Z429]	2907
			3.58362	0	Transcription Factor Complex		0.Annotation definition not found in 'Homo Sapiens.properties' file	0.Annotation definition not found in 'Homo Sapiens.properties' file	0.279048	1	4	ENSG00000136146	GENE-non_stop_decay,protein_coding	29079	MED4	MED4			false	29079	300	0	1	ASSOCIATED_NEW_GENE	0	0.992195	false	0	29079	0		0	[A0A024RDY7, A0A087X0U0, Q5T911, Q9NPJ6, U4PSC4]	29079
			3.99317	0			3.Intra Cellular	3.Intra Cellular	0.250427	1	6	ENSG00000113580	GENE-processed_transcript,protein_coding	2908	NR3C1	NR3C1			false	2908	109	0	1	ASSOCIATED_NEW_GENE	0	0.990957	false	0	2908	0		0	[A0A411AGV5, A0A411AGV9, A0A411AGW6, A0A494C0P1, A0A5B9RIM3, B6ZGU6, B7Z7I2, D6RDA9, E5KQF5, E5KQF6, F1D8N4, F5ATB8, H6V744, H6V745, L8E9L6, P04150, Q3MSN1, Q3MSN4]	2908
			3.54676	0			1.Extracellular	1.Extracellular, 2.Plasma Membrane, 3.Intra Cellular	0.281948	1	4	ENSG00000054148	GENE-processed_transcript,protein_coding	29085	PHPT1	PHPT1			false	29085	327	0	1	ASSOCIATED_NEW_GENE	0	0.992306	false	0	29085	0		0	[Q9NRX4, V9HWC4]	29085
			3.57406	0			0.Annotation definition not found in 'Homo Sapiens.properties' file	0.Annotation definition not found in 'Homo Sapiens.properties' file	0.279794	1	4	ENSG00000151500	GENE-processed_transcript,protein_coding,retained_intron	29087	THYN1	THYN1			false	29087	307	0	1	ASSOCIATED_NEW_GENE	0	0.992223	false	0	29087	0		0	[A0A024R3M1, Q9P016]	29087
			3.54676	0			1.Extracellular	1.Extracellular, 3.Intra Cellular	0.281948	1	4	ENSG00000119862	GENE-nonsense_mediated_decay,protein_coding	29094	LGALSL	LGALSL			false	29094	327	0	1	ASSOCIATED_NEW_GENE	0	0.992306	false	0	29094	0		0	[B9A055, F8WF17, Q3ZCW2, U3KQ88, U3KQU5]	29094
			3.5413	0			0.Annotation definition not found in 'Homo Sapiens.properties' file	0.Annotation definition not found in 'Homo Sapiens.properties' file	0.282382	1	4	ENSG00000276043	GENE-protein_coding	29128	UHRF1	UHRF1			false	29128	331	0	1	ASSOCIATED_NEW_GENE	0	0.992322	false	0	29128	0		0	[A0A087WTW0, A0A087WVR3, A0A087WWG9, L8ECE3, Q96T88]	29128
			3.5413	0			2.Plasma Membrane	2.Plasma Membrane, 3.Intra Cellular	0.282382	1	4	ENSG00000196277	GENE-nonsense_mediated_decay,processed_transcript,protein_coding,retained_intron	2917	GRM7	GRM7			false	2917	331	0	1	ASSOCIATED_NEW_GENE	0	0.992322	false	0	2917	0		0	[A0A0A0MSC3, B2R693, B7ZKK0, B9EGG9, C9JMT3, C9JU97, F8WAW6, F8WCR9, H7C3K2, L8E797, Q14831, Q59G95]	2917
			3.54676	0			1.Extracellular	1.Extracellular, 3.Intra Cellular	0.281948	1	4	ENSG00000213366	GENE-TEC,processed_transcript,protein_coding,retained_intron	2946	GSTM2	GSTM2			false	2946	327	0	1	ASSOCIATED_NEW_GENE	0	0.992306	false	0	2946	0		0	[A0A384P5E9, A8HT81, E9PGV1, E9PHN6, E9PHN7, E9PLF1, F6XZQ7, P28161, Q0D2I8]	2946
			4.06689	0			1.Extracellular	1.Extracellular, 3.Intra Cellular	0.245888	1	6	ENSG00000084207	GENE-nonsense_mediated_decay,protein_coding,retained_intron	2950	GSTP1	GSTP1			false	2950	108	0	1	ASSOCIATED_NEW_GENE	0	0.990734	false	0	2950	0		0	[A0A087X243, A0A087X2E9, A0A0M4UT83, A0A0M5MRY8, A0A2P1FDF0, A0A2R8Y5E5, A0A3B6XSH2, A8MX94, B2C310, C7DJS1, C7DJS2, P09211, Q5D6A5, V9HWE9]	2950
			3.58362	0			3.Intra Cellular	3.Intra Cellular	0.279048	1	4	ENSG00000116062	GENE-nonsense_mediated_decay,processed_transcript,protein_coding	2956	MSH6	MSH6			false	2956	300	0	1	ASSOCIATED_NEW_GENE	0	0.992195	false	0	2956	0		0	[A0A087WWJ1, A0A087WYT6, A0A494C0M1, C9J7Y7, C9J8Y8, C9JH55, F8W7G9, F8WAX8, P52701, Q3SWU9]	2956
			3.58362	0			3.Intra Cellular	3.Intra Cellular	0.279048	1	4	ENSG00000263001	GENE-nonsense_mediated_decay,processed_transcript,protein_coding,retained_intron	2969	GTF2I	GTF2I			false	2969	300	0	1	ASSOCIATED_NEW_GENE	0	0.992195	false	0	2969	0		0	[A0A1W6S962, A0A494C013, A0A494C0Q7, A0A494C1K3, A0A8F9S2Z6, A8K9W7, C9J6M0, P78347, Q499G6, X5D2J9, X5D7Q9, X5D939, X5DNP5, X5DR09]	2969
			3.5413	0	Transcription Factor Complex		5.Nucleus	5.Nucleus	0.282382	1	4	ENSG00000077235	GENE-nonsense_mediated_decay,processed_transcript,protein_coding,retained_intron	2975	GTF3C1	GTF3C1			false	2975	331	0	1	ASSOCIATED_NEW_GENE	0	0.992322	false	0	2975	0		0	[H3BRD0, H3BU37, H3BU55, I3L1Z3, Q12789, Q7Z7H4]	2975
			3.5413	0			3.Intra Cellular	3.Intra Cellular	0.282382	1	4	ENSG00000138594	GENE-nonsense_mediated_decay,processed_transcript,protein_coding	29766	TMOD3	TMOD3			false	29766	331	0	1	ASSOCIATED_NEW_GENE	0	0.992322	false	0	29766	0		0	[H0YKU1, H0YNJ8, H0YNU8, Q9NYL9]	29766
			3.5413	0			3.Intra Cellular	3.Intra Cellular	0.282382	1	4	ENSG00000128872	GENE-nonsense_mediated_decay,protein_coding,retained_intron	29767	TMOD2	TMOD2			false	29767	331	0	1	ASSOCIATED_NEW_GENE	0	0.992322	false	0	29767	0		0	[G5EA42, H0YMA2, Q4G0W6, Q9NZR1]	29767
			3.57406	0	Transcription Factor Complex		5.Nucleus	5.Nucleus	0.279794	1	4	ENSG00000146109	GENE-protein_coding	29777	ABT1	ABT1			false	29777	307	0	1	ASSOCIATED_NEW_GENE	0	0.992223	false	0	29777	0		0	[A0A024R029, Q9ULW3]	29777
			4.07099	0			0.Annotation definition not found in 'Homo Sapiens.properties' file	0.Annotation definition not found in 'Homo Sapiens.properties' file	0.245641	1	6	ENSG00000134317	GENE-nonsense_mediated_decay,protein_coding,retained_intron	29841	GRHL1	GRHL1			false	29841	48	0	1	ASSOCIATED_NEW_GENE	0	0.990722	false	0	29841	0		0	[B7Z1S6, C9JYY8, F8WFB0, Q9NZI5]	29841
			3.99317	0			3.Intra Cellular	3.Intra Cellular	0.250427	1	6	ENSG00000086300	GENE-processed_transcript,protein_coding	29887	SNX10	SNX10			false	29887	109	0	1	ASSOCIATED_NEW_GENE	0	0.990957	false	0	29887	0		0	[A0A024RA70, A0A087WUJ3, B4DJM0, C9JQ16, C9JUQ6, G5E9H5, Q75MD2, Q75MY3, Q8N5Z3, Q9Y5X0]	29887
			3.5413	0			5.Nucleus	5.Nucleus	0.282382	1	4	ENSG00000259956	GENE-protein_coding	29890	RBM15B	RBM15B			false	29890	331	0	1	ASSOCIATED_NEW_GENE	0	0.992322	false	0	29890	0		0	[L8EAN0, Q0VA89, Q8NDT2]	29890
			3.5413	0			1.Extracellular	1.Extracellular, 3.Intra Cellular	0.282382	1	4	ENSG00000163754	GENE-processed_transcript,protein_coding,retained_intron	2992	GYG1	GYG1			false	2992	331	0	1	ASSOCIATED_NEW_GENE	0	0.992322	false	0	2992	0		0	[C9J7C7, C9J8R8, C9JQ42, G5E9W8, P46976, Q8N5Y3]	2992
			4.16655	0			2.Plasma Membrane	2.Plasma Membrane	0.240007	1	6	ENSG00000183484	GENE-nonsense_mediated_decay,processed_transcript,protein_coding	29933	GPR132	GPR132			false	29933	58	0	1	ASSOCIATED_NEW_GENE	0	0.990433	false	0	29933	0		0	[A0A0G2JL29, B2LM89, F8VRH8, Q9UNW8]	29933
			3.5413	0			3.Intra Cellular	3.Intra Cellular	0.282382	1	4	ENSG00000147164	GENE-processed_transcript,protein_coding	29934	SNX12	SNX12			false	29934	331	0	1	ASSOCIATED_NEW_GENE	0	0.992322	false	0	29934	0		0	[A0A087X0R6, Q3SYF1, Q9UMY4]	29934
			4.06689	0			3.Intra Cellular	3.Intra Cellular	0.245888	1	6	ENSG00000143418	GENE-processed_transcript,protein_coding,retained_intron	29956	CERS2	CERS2			false	29956	108	0	1	ASSOCIATED_NEW_GENE	0	0.990734	false	0	29956	0		0	[H0YKH6, H0YLQ6, H0YNU7, Q5SZE1, Q5SZE2, Q5SZE3, Q5SZE4, Q96G23]	29956
			3.5413	0			2.Plasma Membrane	2.Plasma Membrane, 3.Intra Cellular	0.282382	1	4	ENSG00000188021	GENE-protein_coding	29978	UBQLN2	UBQLN2			false	29978	331	0	1	ASSOCIATED_NEW_GENE	0	0.992322	false	0	29978	0		0	[Q9UHD9]	29978
			4.07235	0			2.Plasma Membrane	2.Plasma Membrane, 3.Intra Cellular	0.245558	1	6	ENSG00000135018	GENE-protein_coding,retained_intron	29979	UBQLN1	UBQLN1			false	29979	46	0	1	ASSOCIATED_NEW_GENE	0	0.990718	false	0	29979	0		0	[A0A024R258, H0YDS0, H0YEZ9, Q9UMX0]	29979
			3.58362	0			0.Annotation definition not found in 'Homo Sapiens.properties' file	0.Annotation definition not found in 'Homo Sapiens.properties' file	0.279048	1	4	ENSG00000159147	GENE-nonsense_mediated_decay,protein_coding,retained_intron	29980	DONSON	DONSON			false	29980	300	0	1	ASSOCIATED_NEW_GENE	0	0.992195	false	0	29980	0		0	[C9J4K5, C9JSP0, F8W8A5, F8WC22, F8WD19, H7C006, H7C1C1, H7C1M7, H7C304, Q9NYP3, V9GY84]	29980
			3.54676	0	Transcription Factor Complex		3.Intra Cellular	3.Intra Cellular	0.281948	1	4	ENSG00000189060	GENE-protein_coding	3005	H1-0	H1-0			false	3005	327	0	1	ASSOCIATED_NEW_GENE	0	0.992306	false	0	3005	0		0	[P07305]	3005
			3.5413	0			0.Annotation definition not found in 'Homo Sapiens.properties' file	0.Annotation definition not found in 'Homo Sapiens.properties' file	0.282382	1	4	ENSG00000124575	GENE-protein_coding	3007	H1-3	H1-3			false	3007	331	0	1	ASSOCIATED_NEW_GENE	0	0.992322	false	0	3007	0		0	[P16402]	3007
			3.5413	0			5.Nucleus	5.Nucleus	0.282382	1	4	ENSG00000184357	GENE-protein_coding	3009	H1-5	H1-5			false	3009	331	0	1	ASSOCIATED_NEW_GENE	0	0.992322	false	0	3009	0		0	[P16401]	3009
			3.5413	0			1.Extracellular	1.Extracellular	0.282382	1	4	ENSG00000277075	GENE-protein_coding	3012	H2AC8	H2AC8			false	3012	331	0	1	ASSOCIATED_NEW_GENE	0	0.992322	false	0	3012	0		0	[P04908, Q08AJ9]	3012
			3.5413	0			1.Extracellular	1.Extracellular	0.282382	1	4	ENSG00000196866	GENE-protein_coding	3013	H2AC7	H2AC7			false	3013	331	0	1	ASSOCIATED_NEW_GENE	0	0.992322	false	0	3013	0		0	[B2R5B6, P20671]	3013
			3.57406	0			1.Extracellular	1.Extracellular	0.279794	1	4	ENSG00000188486	GENE-nonsense_mediated_decay,protein_coding	3014	H2AX	H2AX			false	3014	307	0	1	ASSOCIATED_NEW_GENE	0	0.992223	false	0	3014	0		0	[P16104]	3014
			4.07099	0			1.Extracellular	1.Extracellular	0.245641	1	6	ENSG00000164032	GENE-processed_transcript,protein_coding,retained_intron	3015	H2AZ1	H2AZ1			false	3015	48	0	1	ASSOCIATED_NEW_GENE	0	0.990722	false	0	3015	0		0	[A0A494C189, P0C0S5]	3015
			3.57406	0			1.Extracellular	1.Extracellular, 3.Intra Cellular	0.279794	1	4	ENSG00000158373	GENE-protein_coding	3017	H2BC5	H2BC5			false	3017	307	0	1	ASSOCIATED_NEW_GENE	0	0.992223	false	0	3017	0		0	[A0A024QZZ7, P58876, P62807]	3017
			3.5413	0			3.Intra Cellular	3.Intra Cellular	0.282382	1	4	ENSG00000276410	GENE-protein_coding	3018	H2BC3	H2BC3			false	3018	331	0	1	ASSOCIATED_NEW_GENE	0	0.992322	false	0	3018	0		0	[P33778]	3018
			4.06689	0	Transcription Factor Complex		1.Extracellular	1.Extracellular, 2.Plasma Membrane, 3.Intra Cellular	0.245888	1	6	ENSG00000182718	GENE-nonsense_mediated_decay,processed_transcript,protein_coding,retained_intron	302	ANXA2	ANXA2			false	302	108	0	1	ASSOCIATED_NEW_GENE	0	0.990734	false	0	302	0		0	[A0A024R5Z7, A0A7I2V4P4, H0YKL9, H0YKN4, H0YKS4, H0YKV8, H0YKX9, H0YKZ7, H0YL33, H0YLE2, H0YLV6, H0YM50, H0YMD0, H0YMD9, H0YMM1, H0YMT9, H0YMU9, H0YMW4, H0YN28, H0YN42, H0YNA0, H0YNB8, H0YNP5, P07355]	302
			3.5413	0			1.Extracellular	1.Extracellular	0.282382	1	4	ENSG00000163041	GENE-processed_transcript,protein_coding,retained_intron	3020	H3-3A	H3-3A			false	3020	331	0	1	ASSOCIATED_NEW_GENE	0	0.992322	false	0	3020	0		0	[A0A590UJJ6, B2R4P9, B4DEB1, P84243]	3020
			3.5413	0			0.Annotation definition not found in 'Homo Sapiens.properties' file	0.Annotation definition not found in 'Homo Sapiens.properties' file	0.282382	1	4	ENSG00000124610	GENE-protein_coding	3024	H1-1	H1-1			false	3024	331	0	1	ASSOCIATED_NEW_GENE	0	0.992322	false	0	3024	0		0	[Q02539]	3024
			3.5413	0			2.Plasma Membrane	2.Plasma Membrane, 3.Intra Cellular	0.282382	1	4	ENSG00000072506	GENE-processed_transcript,protein_coding,retained_intron	3028	HSD17B10	HSD17B10			false	3028	331	0	1	ASSOCIATED_NEW_GENE	0	0.992322	false	0	3028	0		0	[A0A0S2Z410, A0A0S2Z434, A0A804HHW5, Q5H928, Q99714]	3028
			3.5413	0	Transcription Factor Complex		3.Intra Cellular	3.Intra Cellular	0.282382	1	4	ENSG00000116478	GENE-processed_transcript,protein_coding,retained_intron	3065	HDAC1	HDAC1			false	3065	331	0	1	ASSOCIATED_NEW_GENE	0	0.992322	false	0	3065	0		0	[B5BU61, B5MGH2, Q13547, Q5TEE2, Q6IT96]	3065
			3.5413	0			1.Extracellular	1.Extracellular, 2.Plasma Membrane, 3.Intra Cellular	0.282382	1	4	ENSG00000115677	GENE-processed_transcript,protein_coding,retained_intron	3069	HDLBP	HDLBP			false	3069	331	0	1	ASSOCIATED_NEW_GENE	0	0.992322	false	0	3069	0		0	[A0A024R4E5, B2R5V9, C9J5E5, C9J739, C9JB08, C9JBS3, C9JE93, C9JEJ8, C9JES8, C9JHN6, C9JHS7, C9JHS9, C9JHZ8, C9JIZ1, C9JK79, C9JMQ6, C9JQ82, C9JT62, C9JZI8, H0Y394, H7BZC3, H7C0A4, H7C2D1, H7C3D0, L8ECQ0, Q00341, Q2HJC8, Q96CF6]	3069
			3.5413	0			1.Extracellular	1.Extracellular, 2.Plasma Membrane, 3.Intra Cellular, 4.Nuclear Membrane	0.282382	1	4	ENSG00000196975	GENE-nonsense_mediated_decay,processed_transcript,protein_coding,retained_intron	307	ANXA4	ANXA4			false	307	331	0	1	ASSOCIATED_NEW_GENE	0	0.992322	false	0	307	0		0	[A0A0U1RRE7, A0A1Y8EKW3, B4E1S2, P09525, Q6P452]	307
			3.58362	0			3.Intra Cellular	3.Intra Cellular	0.279048	1	4	ENSG00000112972	GENE-protein_coding,retained_intron	3157	HMGCS1	HMGCS1			false	3157	300	0	1	ASSOCIATED_NEW_GENE	0	0.992195	false	0	3157	0		0	[A0A024R059, D6RIW1, Q01581]	3157
			3.57406	0	Transcription Factor Complex		3.Intra Cellular	3.Intra Cellular	0.279794	1	4	ENSG00000137309	GENE-processed_transcript,protein_coding	3159	HMGA1	HMGA1			false	3159	307	0	1	ASSOCIATED_NEW_GENE	0	0.992223	false	0	3159	0		0	[A0A024RCT9, A0A024RCU8, A0A024RD06, A0A669KAX1, P17096, Q5T6U8, Q6IPL9]	3159
			3.57406	0	Transcription Factor Complex		3.Intra Cellular	3.Intra Cellular, 4.Nuclear Membrane	0.279794	1	4	ENSG00000123358	GENE-processed_transcript,protein_coding,retained_intron	3164	NR4A1	NR4A1			false	3164	307	0	1	ASSOCIATED_NEW_GENE	0	0.992223	false	0	3164	0		0	[A0A024R126, F5GXF0, F8VVX9, H3BPN8, H3BQG5, H3BSB9, H3BSM8, H3BT85, P22736, Q6ZMM6]	3164
			3.5413	0			3.Intra Cellular	3.Intra Cellular	0.282382	1	4	ENSG00000101076	GENE-nonsense_mediated_decay,processed_transcript,protein_coding,retained_intron	3172	HNF4A	HNF4A			false	3172	331	0	1	ASSOCIATED_NEW_GENE	0	0.992322	false	0	3172	0		0	[A0A087WXV4, A0A2R3XWA5, A0A2R3XWA6, A0A2R3XWC8, A0A2R3XWF7, A0A804HI58, A0A804HIR4, A0A804HJ41, A0A804HJ81, A0A804HJJ6, A0A804HJL7, B9VVT8, F1D8S2, F1D8T0, F1D8T1, F8WBS7, P41235, Q8NHY1]	3172
			3.5413	0			2.Plasma Membrane	2.Plasma Membrane	0.282382	1	4	ENSG00000166351	GENE-protein_coding	317754	POTED	POTED			false	317754	331	0	1	ASSOCIATED_NEW_GENE	0	0.992322	false	0	317754	0		0	[A0A087X1W7, Q86YR6]	317754
			3.5413	0			1.Extracellular	1.Extracellular	0.282382	1	4	ENSG00000184270	GENE-protein_coding	317772	H2AC21	H2AC21			false	317772	331	0	1	ASSOCIATED_NEW_GENE	0	0.992322	false	0	317772	0		0	[Q8IUE6]	317772
			3.54676	0	Transcription Factor Complex		3.Intra Cellular	3.Intra Cellular	0.281948	1	4	ENSG00000197451	GENE-protein_coding,retained_intron	3182	HNRNPAB	HNRNPAB			false	3182	327	0	1	ASSOCIATED_NEW_GENE	0	0.992306	false	0	3182	0		0	[D6R9P3, D6RBZ0, D6RD18, Q99729]	3182
			3.58362	0			1.Extracellular	1.Extracellular, 3.Intra Cellular	0.279048	1	4	ENSG00000165119	GENE-nonsense_mediated_decay,protein_coding,retained_intron	3190	HNRNPK	HNRNPK			false	3190	300	0	1	ASSOCIATED_NEW_GENE	0	0.992195	false	0	3190	0		0	[B4DUQ1, P61978, Q5T6W2, S4R359, S4R457]	3190
			3.58362	0			1.Extracellular	1.Extracellular, 3.Intra Cellular	0.279048	1	4	ENSG00000104824	GENE-nonsense_mediated_decay,protein_coding,retained_intron	3191	HNRNPL	HNRNPL			false	3191	300	0	1	ASSOCIATED_NEW_GENE	0	0.992195	false	0	3191	0		0	[A0A3B3ITJ4, B4DVF8, M0QXS5, M0QYL7, M0R1W6, P14866, Q6NTA2]	3191
			3.54676	0			2.Plasma Membrane	2.Plasma Membrane	0.281948	1	4	ENSG00000146383	GENE-protein_coding	319100	TAAR6	TAAR6			false	319100	327	0	1	ASSOCIATED_NEW_GENE	0	0.992306	false	0	319100	0		0	[Q96RI8]	319100
			4.07099	0			0.Annotation definition not found in 'Homo Sapiens.properties' file	0.Annotation definition not found in 'Homo Sapiens.properties' file	0.245641	1	6	ENSG00000105997	GENE-processed_transcript,protein_coding	3200	HOXA3	HOXA3			false	3200	48	0	1	ASSOCIATED_NEW_GENE	0	0.990722	false	0	3200	0		0	[A0A024RA33, A4D182, B3KPN8, E5RIJ8, F2Z3A4, O43365]	3200
			3.54676	0	Transcription Factor Complex		0.Annotation definition not found in 'Homo Sapiens.properties' file	0.Annotation definition not found in 'Homo Sapiens.properties' file	0.281948	1	4	ENSG00000005073	GENE-protein_coding	3207	HOXA11	HOXA11			false	3207	327	0	1	ASSOCIATED_NEW_GENE	0	0.992306	false	0	3207	0		0	[H0YIA6, P31270]	3207
			3.5413	0			0.Annotation definition not found in 'Homo Sapiens.properties' file	0.Annotation definition not found in 'Homo Sapiens.properties' file	0.282382	1	4	ENSG00000106031	GENE-processed_transcript,protein_coding	3209	HOXA13	HOXA13			false	3209	331	0	1	ASSOCIATED_NEW_GENE	0	0.992322	false	0	3209	0		0	[I6N936, P31271, Q6DI00]	3209
			3.5413	0			0.Annotation definition not found in 'Homo Sapiens.properties' file	0.Annotation definition not found in 'Homo Sapiens.properties' file	0.282382	1	4	ENSG00000120068	GENE-protein_coding	3218	HOXB8	HOXB8			false	3218	331	0	1	ASSOCIATED_NEW_GENE	0	0.992322	false	0	3218	0		0	[I3L383, I3L3R1, P17481, Q8N8T3]	3218
			3.54676	0			2.Plasma Membrane	2.Plasma Membrane, 3.Intra Cellular	0.281948	1	4	ENSG00000174775	GENE-nonsense_mediated_decay,processed_transcript,protein_coding,retained_intron	3265	HRAS	HRAS			false	3265	327	0	1	ASSOCIATED_NEW_GENE	0	0.992306	false	0	3265	0		0	[A0A0J9YXG8, A0A804HJ06, A0A804HKM6, A0A8C8MQR2, P01112, P78460, X5D945]	3265
			3.5413	0			1.Extracellular	1.Extracellular, 3.Intra Cellular, 4.Nuclear Membrane	0.282382	1	4	ENSG00000164062	GENE-nonsense_mediated_decay,protein_coding,retained_intron	327	APEH	APEH			false	327	331	0	1	ASSOCIATED_NEW_GENE	0	0.992322	false	0	327	0		0	[C9JIF9, C9JLK2, F8WBC4, F8WEH5, H0YFE5, H7C1U0, H7C273, H7C393, P13798]	327
			4.36724	0	Transcription Factor Complex		3.Intra Cellular	3.Intra Cellular, 5.Nucleus	0.228978	1	6	ENSG00000100823	GENE-nonsense_mediated_decay,processed_transcript,protein_coding,retained_intron	328	APEX1	APEX1			false	328	31	0	1	ASSOCIATED_NEW_GENE	0	0.989827	false	0	328	0		0	[A0A0C4DGK8, G3V2D9, G3V359, G3V3C7, G3V3M6, G3V3Y6, G3V574, G3V5D9, G3V5M0, G3V5Q1, H7C4A8, P27695, Q5TZP7]	328
			3.54676	0			3.Intra Cellular	3.Intra Cellular	0.281948	1	4	ENSG00000130948	GENE-nonsense_mediated_decay,processed_transcript,protein_coding	3293	HSD17B3	HSD17B3			false	3293	327	0	1	ASSOCIATED_NEW_GENE	0	0.992306	false	0	3293	0		0	[A0A0S2Z3U6, A0A0S2Z3V7, A0A0S2Z406, A0A0S2Z413, A0A3B3ITT4, A0A3B3ITW2, P37058, Q6FH62]	3293
			3.5413	0			3.Intra Cellular	3.Intra Cellular	0.282382	1	4	ENSG00000023445	GENE-processed_transcript,protein_coding,retained_intron	330	BIRC3	BIRC3			false	330	331	0	1	ASSOCIATED_NEW_GENE	0	0.992322	false	0	330	0		0	[A0A669KBC7, H0YCJ5, L8E7L9, Q13489]	330
			3.5413	0			1.Extracellular	1.Extracellular, 2.Plasma Membrane, 3.Intra Cellular	0.282382	1	4	ENSG00000204389	GENE-protein_coding	3303	HSPA1A	HSPA1A			false	3303	331	0	1	ASSOCIATED_NEW_GENE	0	0.992322	false	0	3303	0		0	[A8K5I0, B3KTT5, P0DMV8, P0DMV9, V9GZ37]	3303
			3.54676	0			3.Intra Cellular	3.Intra Cellular	0.281948	1	4	ENSG00000101966	GENE-processed_transcript,protein_coding	331	XIAP	XIAP			false	331	327	0	1	ASSOCIATED_NEW_GENE	0	0.992306	false	0	331	0		0	[B1AKU2, B1AKU3, B2R9R2, P98170]	331
			3.5413	0			3.Intra Cellular	3.Intra Cellular	0.282382	1	4	ENSG00000089685	GENE-nonsense_mediated_decay,processed_transcript,protein_coding,retained_intron	332	BIRC5	BIRC5			false	332	331	0	1	ASSOCIATED_NEW_GENE	0	0.992322	false	0	332	0		0	[A0A0B4J1S3, A0A7L8XZM3, A3E0Z4, A3E0Z5, A3E0Z6, A3E0Z7, A3E0Z8, E7CU85, H3BLT4, K7ELG2, K7EMW2, K7EP76, O15392]	332
			3.5413	0			1.Extracellular	1.Extracellular	0.282382	1	4	ENSG00000203852	GENE-protein_coding	333932	H3C15	H3C15			false	333932	331	0	1	ASSOCIATED_NEW_GENE	0	0.992322	false	0	333932	0		0	[Q71DI3]	333932
			3.58362	0			1.Extracellular	1.Extracellular, 3.Intra Cellular	0.279048	1	4	ENSG00000184330	GENE-protein_coding	338324	S100A7A	S100A7A			false	338324	300	0	1	ASSOCIATED_NEW_GENE	0	0.992195	false	0	338324	0		0	[Q86SG5]	338324
			3.54676	0			1.Extracellular	1.Extracellular	0.281948	1	4	ENSG00000240654	GENE-protein_coding	338872	C1QTNF9	C1QTNF9			false	338872	327	0	1	ASSOCIATED_NEW_GENE	0	0.992306	false	0	338872	0		0	[A0A3B0J259, P0C862]	338872
			3.57406	0			3.Intra Cellular	3.Intra Cellular	0.279794	1	4	ENSG00000176261	GENE-nonsense_mediated_decay,processed_transcript,protein_coding,retained_intron	339487	ZBTB8OS	ZBTB8OS			false	339487	307	0	1	ASSOCIATED_NEW_GENE	0	0.992223	false	0	339487	0		0	[A0A087WTK6, A0A087WUU3, A0A087WW18, A0A087X0V4, A0A087X1H4, A0A8C8MQ05, A8K0B5, D3DPQ2, F6SII6, H7C3R6, Q8IWT0, S4R426]	339487
			4.06689	0			1.Extracellular	1.Extracellular, 3.Intra Cellular	0.245888	1	6	ENSG00000284862	GENE-processed_transcript,protein_coding,retained_intron	339829	CCDC39	CCDC39			false	339829	108	0	1	ASSOCIATED_NEW_GENE	0	0.990734	false	0	339829	0		0	[A0A494C1Q3, H7C4X6, H7C5I6, Q9UFE4]	339829
			3.54676	0			1.Extracellular	1.Extracellular, 2.Plasma Membrane	0.281948	1	4	ENSG00000187054	GENE-protein_coding	339967	TMPRSS11A	TMPRSS11A			false	339967	327	0	1	ASSOCIATED_NEW_GENE	0	0.992306	false	0	339967	0		0	[A0A0A0MR82, A8KA85, H0YAL9, Q6ZMR5]	339967
			3.57406	0			3.Intra Cellular	3.Intra Cellular	0.279794	1	4	ENSG00000185818	GENE-protein_coding	339983	NAT8L	NAT8L			false	339983	307	0	1	ASSOCIATED_NEW_GENE	0	0.992223	false	0	339983	0		0	[Q8N9F0]	339983
			3.54676	0			3.Intra Cellular	3.Intra Cellular	0.281948	1	4	ENSG00000172201	GENE-protein_coding	3400	ID4	ID4			false	3400	327	0	1	ASSOCIATED_NEW_GENE	0	0.992306	false	0	3400	0		0	[P47928]	3400
			3.54676	0			2.Plasma Membrane	2.Plasma Membrane	0.281948	1	4	ENSG00000181333	GENE-protein_coding	341208	HEPHL1	HEPHL1			false	341208	327	0	1	ASSOCIATED_NEW_GENE	0	0.992306	false	0	341208	0		0	[Q6MZM0]	341208
			3.57406	0			0.Annotation definition not found in 'Homo Sapiens.properties' file	0.Annotation definition not found in 'Homo Sapiens.properties' file	0.279794	1	4	ENSG00000196391	GENE-nonsense_mediated_decay,processed_transcript,protein_coding	342132	ZNF774	ZNF774			false	342132	307	0	1	ASSOCIATED_NEW_GENE	0	0.992223	false	0	342132	0		0	[E7EQ77, H0YLG8, H0YNW6, Q6NX45]	342132
			3.54676	0			3.Intra Cellular	3.Intra Cellular	0.281948	1	4	ENSG00000010404	GENE-nonsense_mediated_decay,processed_transcript,protein_coding	3423	IDS	IDS			false	3423	327	0	1	ASSOCIATED_NEW_GENE	0	0.992306	false	0	3423	0		0	[A0A286RZ44, A0A286RZ48, A0A286S6N5, B3KWA1, B4DGD7, E5RHJ1, H0YB91, L8E9D7, O60597, P22304, Q14603]	3423
			3.5413	0			5.Nucleus	5.Nucleus	0.282382	1	4	ENSG00000224470	GENE-processed_transcript,protein_coding,retained_intron	342371	ATXN1L	ATXN1L			false	342371	331	0	1	ASSOCIATED_NEW_GENE	0	0.992322	false	0	342371	0		0	[G1UI23, P0C7T5]	342371
			3.54676	0			1.Extracellular	1.Extracellular	0.281948	1	4	ENSG00000205403	GENE-processed_transcript,protein_coding,retained_intron	3426	CFI	CFI			false	3426	327	0	1	ASSOCIATED_NEW_GENE	0	0.992306	false	0	3426	0		0	[A8K3L0, B4DRF2, D6R9Z8, E7ETH0, G3XAM2, P05156, Q8WW88]	3426
			4.16655	0			0.Annotation definition not found in 'Homo Sapiens.properties' file	0.Annotation definition not found in 'Homo Sapiens.properties' file	0.240007	1	6	ENSG00000186212	GENE-protein_coding	345079	SOWAHB	SOWAHB			false	345079	58	0	1	ASSOCIATED_NEW_GENE	0	0.990433	false	0	345079	0		0	[A6NEL2]	345079
			3.5413	0			1.Extracellular	1.Extracellular	0.282382	1	4	ENSG00000171855	GENE-protein_coding	3456	IFNB1	IFNB1			false	3456	331	0	1	ASSOCIATED_NEW_GENE	0	0.992322	false	0	3456	0		0	[A0A7R8GV38, B5BUQ5, P01574]	3456
			3.54676	0			1.Extracellular	1.Extracellular	0.281948	1	4	ENSG00000111537	GENE-protein_coding	3458	IFNG	IFNG			false	3458	327	0	1	ASSOCIATED_NEW_GENE	0	0.992306	false	0	3458	0		0	[A0A7R8GUN6, A8YQE4, P01579]	3458
			3.58362	0			3.Intra Cellular	3.Intra Cellular	0.279048	1	4	ENSG00000166831	GENE-protein_coding	348093	RBPMS2	RBPMS2			false	348093	300	0	1	ASSOCIATED_NEW_GENE	0	0.992195	false	0	348093	0		0	[Q6ZRY4]	348093
			3.5413	0			3.Intra Cellular	3.Intra Cellular	0.282382	1	4	ENSG00000167646	GENE-nonsense_mediated_decay,processed_transcript,protein_coding,retained_intron	352909	DNAAF3	DNAAF3			false	352909	331	0	1	ASSOCIATED_NEW_GENE	0	0.992322	false	0	352909	0		0	[H0YCU4, H0YD30, M0R2L0, M0R359, Q8N9W5]	352909
			3.54676	0			0.Annotation definition not found in 'Homo Sapiens.properties' file	0.Annotation definition not found in 'Homo Sapiens.properties' file	0.281948	1	4	ENSG00000185219	GENE-protein_coding,retained_intron	353274	ZNF445	ZNF445			false	353274	327	0	1	ASSOCIATED_NEW_GENE	0	0.992306	false	0	353274	0		0	[A0A087X0J9, P59923]	353274
			3.5413	0			3.Intra Cellular	3.Intra Cellular	0.282382	1	4	ENSG00000113141	GENE-nonsense_mediated_decay,processed_transcript,protein_coding,retained_intron	3550	IK	IK			false	3550	331	0	1	ASSOCIATED_NEW_GENE	0	0.992322	false	0	3550	0		0	[A0A0C4DGW5, D6RAH1, D6RAY9, D6RCQ4, D6REL4, E7EQZ7, Q13123, Q95HA6, Q9UK43]	3550
			3.54676	0			1.Extracellular	1.Extracellular, 2.Plasma Membrane, 3.Intra Cellular	0.281948	1	4	ENSG00000115008	GENE-protein_coding	3552	IL1A	IL1A			false	3552	327	0	1	ASSOCIATED_NEW_GENE	0	0.992306	false	0	3552	0		0	[P01583]	3552
			3.5413	0			1.Extracellular	1.Extracellular, 2.Plasma Membrane	0.282382	1	4	ENSG00000160712	GENE-processed_transcript,protein_coding,retained_intron	3570	IL6R	IL6R			false	3570	331	0	1	ASSOCIATED_NEW_GENE	0	0.992322	false	0	3570	0		0	[A0A087WTB5, A0N0L5, D6R9R8, H0Y949, H0Y9B1, P08887]	3570
			3.57406	0			1.Extracellular	1.Extracellular, 2.Plasma Membrane, 3.Intra Cellular	0.279794	1	4	ENSG00000169194	GENE-processed_transcript,protein_coding,retained_intron	3596	IL13	IL13			false	3596	307	0	1	ASSOCIATED_NEW_GENE	0	0.992223	false	0	3596	0		0	[A0A087WW07, D3DQ88, P35225, Q4VB50, Q4VB51, Q4VB53]	3596
			3.57406	0			3.Intra Cellular	3.Intra Cellular	0.279794	1	4		GENE-pseudo	360165	NDUFA4P1	NDUFA4P1			false	360165	307	0	1	ASSOCIATED_NEW_GENE	0	0.992223	false	0	360165	0		0		360165
			3.58362	0			1.Extracellular	1.Extracellular, 3.Intra Cellular, 5.Nucleus	0.279048	1	4	ENSG00000143621	GENE-processed_transcript,protein_coding	3608	ILF2	ILF2			false	3608	300	0	1	ASSOCIATED_NEW_GENE	0	0.992195	false	0	3608	0		0	[A0A0A0MRL0, B4DY09, F4ZW62, Q12905, Q53FG3, X6R6Z1]	3608
			3.5413	0			3.Intra Cellular	3.Intra Cellular	0.282382	1	4	ENSG00000133731	GENE-nonsense_mediated_decay,processed_transcript,protein_coding,retained_intron	3612	IMPA1	IMPA1			false	3612	331	0	1	ASSOCIATED_NEW_GENE	0	0.992322	false	0	3612	0		0	[A0A024R830, A0A140VJL8, E5RG13, E5RG94, E5RGY4, E5RHE9, E5RI82, E5RIF4, E5RIP7, H0YBL1, P29218]	3612
			3.5413	0			1.Extracellular	1.Extracellular, 3.Intra Cellular	0.282382	1	4	ENSG00000106348	GENE-nonsense_mediated_decay,protein_coding,retained_intron	3614	IMPDH1	IMPDH1			false	3614	331	0	1	ASSOCIATED_NEW_GENE	0	0.992322	false	0	3614	0		0	[A0A024R725, A0A3B3IRL5, B3KRZ3, C9J029, C9J381, C9K0R9, F8WDE9, H7C511, H7C5T1, P20839, Q6ZNB1]	3614
			3.54676	0			3.Intra Cellular	3.Intra Cellular	0.281948	1	4	ENSG00000149503	GENE-processed_transcript,protein_coding,retained_intron	3619	INCENP	INCENP			false	3619	327	0	1	ASSOCIATED_NEW_GENE	0	0.992306	false	0	3619	0		0	[E9PM67, Q9NQS7]	3619
			3.5413	0			1.Extracellular	1.Extracellular, 3.Intra Cellular	0.282382	1	4	ENSG00000163083	GENE-protein_coding	3625	INHBB	INHBB			false	3625	331	0	1	ASSOCIATED_NEW_GENE	0	0.992322	false	0	3625	0		0	[A0PK08, P09529]	3625
			3.58362	0			2.Plasma Membrane	2.Plasma Membrane, 3.Intra Cellular, 4.Nuclear Membrane	0.279048	1	4	ENSG00000040933	GENE-processed_transcript,protein_coding,retained_intron	3631	INPP4A	INPP4A			false	3631	300	0	1	ASSOCIATED_NEW_GENE	0	0.992195	false	0	3631	0		0	[B8ZZB2, D3DVH3, Q96PE3]	3631
			3.5413	0			2.Plasma Membrane	2.Plasma Membrane	0.282382	1	4	ENSG00000091409	GENE-protein_coding,retained_intron	3655	ITGA6	ITGA6			false	3655	331	0	1	ASSOCIATED_NEW_GENE	0	0.992322	false	0	3655	0		0	[A0A8C8KBL6, C9JXX7, H7BZ97, P23229]	3655
			3.5413	0			2.Plasma Membrane	2.Plasma Membrane, 3.Intra Cellular	0.282382	1	4	ENSG00000169083	GENE-nonsense_mediated_decay,processed_transcript,protein_coding	367	AR	AR			false	367	331	0	1	ASSOCIATED_NEW_GENE	0	0.992322	false	0	367	0		0	[A0A087WUX9, A0A087X1B6, A0A3G2C3P2, A0A6H0MAB3, A0A6H0MAE6, A0A7I2PS51, C0JKD5, C0JKD6, C0JKD7, D2KF13, D2Y6K2, D3YPP9, D3YPQ0, D3YPQ1, D3YPQ2, D3YPQ3, D5M8Q2, E9PEG3, F1D8N5, F5GZG9, G4VV16, P10275, Q13771, Q9NUA2, Q9UKJ6, V9GZH8, V9TLK5, X5DNC5]	367
			3.57406	0			3.Intra Cellular	3.Intra Cellular	0.279794	1	4	ENSG00000016082	GENE-processed_transcript,protein_coding	3670	ISL1	ISL1			false	3670	307	0	1	ASSOCIATED_NEW_GENE	0	0.992223	false	0	3670	0		0	[D6RBJ1, P61371]	3670
			3.57406	0			1.Extracellular	1.Extracellular, 2.Plasma Membrane, 3.Intra Cellular	0.279794	1	4	ENSG00000005884	GENE-nonsense_mediated_decay,protein_coding,retained_intron	3675	ITGA3	ITGA3			false	3675	307	0	1	ASSOCIATED_NEW_GENE	0	0.992223	false	0	3675	0		0	[A0A140VJM0, D6R9X8, H0YA32, H0YA49, K7EMU3, K7EQJ2, P26006]	3675
			3.5413	0			1.Extracellular	1.Extracellular, 2.Plasma Membrane, 3.Intra Cellular	0.282382	1	4	ENSG00000259207	GENE-nonsense_mediated_decay,protein_coding	3690	ITGB3	ITGB3			false	3690	331	0	1	ASSOCIATED_NEW_GENE	0	0.992322	false	0	3690	0		0	[A0A5E4DMZ9, A0A6B9NYH9, A7U833, F1C630, F1C632, F1C633, F1C634, F2X0U9, F2X0V0, I3L4X8, L7UUZ7, L7UW06, L7WKL1, P05106, Q16157, Q1PBM2]	3690
			4.06689	0			3.Intra Cellular	3.Intra Cellular	0.245888	1	6	ENSG00000143772	GENE-protein_coding	3707	ITPKB	ITPKB			false	3707	108	0	1	ASSOCIATED_NEW_GENE	0	0.990734	false	0	3707	0		0	[B2R9J0, P27987]	3707
			3.58362	0			2.Plasma Membrane	2.Plasma Membrane, 3.Intra Cellular, 4.Nuclear Membrane, 5.Nucleus	0.279048	1	4	ENSG00000096433	GENE-protein_coding	3710	ITPR3	ITPR3			false	3710	300	0	1	ASSOCIATED_NEW_GENE	0	0.992195	false	0	3710	0		0	[A6H8K3, Q14573, Q59ES2]	3710
			3.58362	0			3.Intra Cellular	3.Intra Cellular	0.279048	1	4	ENSG00000162434	GENE-nonsense_mediated_decay,processed_transcript,protein_coding,retained_intron	3716	JAK1	JAK1			false	3716	300	0	1	ASSOCIATED_NEW_GENE	0	0.992195	false	0	3716	0		0	[A0A0A0N0M2, A0A5F9ZH07, A0A5F9ZH32, A0A5F9ZH73, A0A5F9ZHI1, A0A5F9ZHK2, A0A5F9ZHN8, A0A5F9ZHW0, A0A5F9ZI01, A0A5F9ZI39, P23458, Q0VGA4, Q4LDX3, Q6P669, Q8IV82]	3716
			3.5413	0			3.Intra Cellular	3.Intra Cellular	0.282382	1	4	ENSG00000008083	GENE-processed_transcript,protein_coding	3720	JARID2	JARID2			false	3720	331	0	1	ASSOCIATED_NEW_GENE	0	0.992322	false	0	3720	0		0	[Q92833]	3720
			3.5413	0			1.Extracellular	1.Extracellular, 2.Plasma Membrane, 3.Intra Cellular	0.282382	1	4	ENSG00000109321	GENE-protein_coding,retained_intron	374	AREG	AREG			false	374	331	0	1	ASSOCIATED_NEW_GENE	0	0.992322	false	0	374	0		0	[D6RFX5, P15514]	374
			3.57406	0			1.Extracellular	1.Extracellular, 3.Intra Cellular	0.279794	1	4	ENSG00000196865	GENE-protein_coding,retained_intron	374354	NHLRC2	NHLRC2			false	374354	307	0	1	ASSOCIATED_NEW_GENE	0	0.992223	false	0	374354	0		0	[Q7Z658, Q8NBF2]	374354
			3.54676	0			0.Annotation definition not found in 'Homo Sapiens.properties' file	0.Annotation definition not found in 'Homo Sapiens.properties' file	0.281948	1	4	ENSG00000196110	GENE-processed_transcript,protein_coding	374879	ZNF699	ZNF699			false	374879	327	0	1	ASSOCIATED_NEW_GENE	0	0.992306	false	0	374879	0		0	[Q32M78]	374879
			3.54676	0			0.Annotation definition not found in 'Homo Sapiens.properties' file	0.Annotation definition not found in 'Homo Sapiens.properties' file	0.281948	1	4	ENSG00000185869	GENE-protein_coding,retained_intron	374899	ZNF829	ZNF829			false	374899	327	0	1	ASSOCIATED_NEW_GENE	0	0.992306	false	0	374899	0		0	[Q3KNS6]	374899
			3.5413	0			2.Plasma Membrane	2.Plasma Membrane, 3.Intra Cellular	0.282382	1	4	ENSG00000180488	GENE-nonsense_mediated_decay,protein_coding,retained_intron	374986	MIGA1	MIGA1			false	374986	331	0	1	ASSOCIATED_NEW_GENE	0	0.992322	false	0	374986	0		0	[A0A2R8YDC7, A0A2R8YE40, A0A2R8YF99, A0A2R8YFQ8, A0A2R8YGK2, B4DK63, B7ZLZ8, F8W7S1, Q8NAN2]	374986
			3.99317	0	Transcription Factor Complex		3.Intra Cellular	3.Intra Cellular	0.250427	1	6	ENSG00000154305	GENE-processed_transcript,protein_coding,retained_intron	375056	MIA3	MIA3			false	375056	109	0	1	ASSOCIATED_NEW_GENE	0	0.990957	false	0	375056	0		0	[A0A0A0MRH6, Q5JRA6]	375056
			3.54676	0			2.Plasma Membrane	2.Plasma Membrane	0.281948	1	4	ENSG00000164411	GENE-processed_transcript,protein_coding	375519	GJB7	GJB7			false	375519	327	0	1	ASSOCIATED_NEW_GENE	0	0.992306	false	0	375519	0		0	[A0A0A0MRM5, Q6PEY0]	375519
			3.5413	0			2.Plasma Membrane	2.Plasma Membrane, 3.Intra Cellular, 4.Nuclear Membrane	0.282382	1	4	ENSG00000143473	GENE-nonsense_mediated_decay,processed_transcript,protein_coding,retained_intron	3756	KCNH1	KCNH1			false	3756	331	0	1	ASSOCIATED_NEW_GENE	0	0.992322	false	0	3756	0		0	[A0A0S1TJ81, A0A0S1TL27, A0A1W2PNI2, A0A1W2PP68, A0A1W2PPA2, A0A1W2PRD8, A0A1W2PRV9, A0A1W2PRZ5, A0A1X7SBS6, L8EAS2, O95259]	3756
			3.5413	0			2.Plasma Membrane	2.Plasma Membrane, 3.Intra Cellular, 5.Nucleus	0.282382	1	4	ENSG00000068796	GENE-nonsense_mediated_decay,protein_coding,retained_intron	3796	KIF2A	KIF2A			false	3796	331	0	1	ASSOCIATED_NEW_GENE	0	0.992322	false	0	3796	0		0	[A0A669KBE9, A0A6Q8PFA6, A0A6Q8PG37, A0A6Q8PGG1, A0A6Q8PGH7, A0A6Q8PH57, B0AZS5, D6R9M0, D6RD93, H0Y8H2, O00139]	3796
			3.5413	0			3.Intra Cellular	3.Intra Cellular	0.282382	1	4	ENSG00000170759	GENE-processed_transcript,protein_coding	3799	KIF5B	KIF5B			false	3799	331	0	1	ASSOCIATED_NEW_GENE	0	0.992322	false	0	3799	0		0	[D3DRX6, P33176, Q2TA90, Q66K46, Q6P164, V9HW29]	3799
			3.58362	0			1.Extracellular	1.Extracellular, 3.Intra Cellular	0.279048	1	4	ENSG00000075239	GENE-nonsense_mediated_decay,processed_transcript,protein_coding,retained_intron	38	ACAT1	ACAT1			false	38	300	0	1	ASSOCIATED_NEW_GENE	0	0.992195	false	0	38	0		0	[A0A140VJX1, A0A5F9ZHD4, A0A5F9ZHH9, A0A5F9ZHJ0, A0A5F9ZHJ7, A0A5F9ZHL1, A0A5F9ZHL7, A0A5F9ZI66, E9PRQ6, H0YEL7, P24752]	38
			3.5413	0			1.Extracellular	1.Extracellular, 2.Plasma Membrane, 3.Intra Cellular, 5.Nucleus	0.282382	1	4	ENSG00000157404	GENE-nonsense_mediated_decay,processed_transcript,protein_coding,retained_intron	3815	KIT	KIT			false	3815	331	0	1	ASSOCIATED_NEW_GENE	0	0.992322	false	0	3815	0		0	[A0A0U2N547, B6DXN3, B6E0M6, D5MAV8, D5MAV9, E2I6G0, L8E780, P10721, Q15999, Q8TCG9, Q9UMA0]	3815
			3.5413	0			3.Intra Cellular	3.Intra Cellular	0.282382	1	4	ENSG00000126214	GENE-nonsense_mediated_decay,protein_coding,retained_intron	3831	KLC1	KLC1			false	3831	331	0	1	ASSOCIATED_NEW_GENE	0	0.992322	false	0	3831	0		0	[B5BU63, F8W6L3, G3V2E7, G3V2P7, G3V3H3, G3V5R9, G5E9S8, H0YG16, H0YGB8, H0YJK1, H0YJL0, H0YJT3, H0YJU9, Q07866, Q7RTQ2]	3831
			3.5413	0			3.Intra Cellular	3.Intra Cellular	0.282382	1	4	ENSG00000138160	GENE-nonsense_mediated_decay,protein_coding	3832	KIF11	KIF11			false	3832	331	0	1	ASSOCIATED_NEW_GENE	0	0.992322	false	0	3832	0		0	[A0A7I2V3A9, A0A7I2V3V3, A0A7I2YQY4, P52732]	3832
			3.57406	0			3.Intra Cellular	3.Intra Cellular	0.279794	1	4	ENSG00000196911	GENE-protein_coding	3841	KPNA5	KPNA5			false	3841	307	0	1	ASSOCIATED_NEW_GENE	0	0.992223	false	0	3841	0		0	[O15131, Q5TD90]	3841
			3.54676	0			3.Intra Cellular	3.Intra Cellular, 5.Nucleus	0.281948	1	4	ENSG00000065150	GENE-nonsense_mediated_decay,processed_transcript,protein_coding,retained_intron	3843	IPO5	IPO5			false	3843	327	0	1	ASSOCIATED_NEW_GENE	0	0.992306	false	0	3843	0		0	[A0A0D9SG25, B3KWG6, C9J583, C9J875, C9JQT6, C9JXE0, C9JZ53, C9JZD8, E7EQT5, E7ESZ1, E7ETV3, E7ETV8, E7EV12, E7EWK4, E7EX05, F8WF30, H0Y3V4, H0Y8C6, O00410, Q9BVS9]	3843
			3.54676	0			2.Plasma Membrane	2.Plasma Membrane, 3.Intra Cellular	0.281948	1	4	ENSG00000133703	GENE-nonsense_mediated_decay,protein_coding,retained_intron	3845	KRAS	KRAS			false	3845	327	0	1	ASSOCIATED_NEW_GENE	0	0.992306	false	0	3845	0		0	[A0A024RAV5, A0A221ZRZ1, A0A221ZRZ4, A0A221ZRZ5, A0A3G1LBH1, A0A5P8I3H7, A5HC02, A5HC03, A5HC04, A5HC05, A5HC06, A5HC07, A5HC08, A5HC09, A5HC10, A5HC11, A5HC12, A5HC13, A5HC14, A5HC15, A5HC16, A5HC17, A5HC18, A5HC19, A5HC20, A5HC21, A5HC23, A5HC24, A5HC25, A5HC26, E5FF39, G3V4K2, G3V5T7, I1SRC5, L7RSL8, P01116, Q71SP6]	3845
			4.06689	0			1.Extracellular	1.Extracellular, 3.Intra Cellular	0.245888	1	6	ENSG00000135480	GENE-processed_transcript,protein_coding,retained_intron	3855	KRT7	KRT7			false	3855	108	0	1	ASSOCIATED_NEW_GENE	0	0.990734	false	0	3855	0		0	[A0A1W2PRP1, P08729, Q3B834, Q3KNV1]	3855
			4.06689	0			1.Extracellular	1.Extracellular, 2.Plasma Membrane, 3.Intra Cellular	0.245888	1	6	ENSG00000067560	GENE-nonsense_mediated_decay,processed_transcript,protein_coding	387	RHOA	RHOA			false	387	108	0	1	ASSOCIATED_NEW_GENE	0	0.990734	false	0	387	0		0	[A0A024R324, A0A0B6XK12, A0A7I2V3G1, A0A7I2V5E6, A0A7I2YQV1, B4DKN9, C9JNR4, C9JRM1, C9JX21, P61586, Q9BVT0]	387
			3.54676	0			0.Annotation definition not found in 'Homo Sapiens.properties' file	0.Annotation definition not found in 'Homo Sapiens.properties' file	0.281948	1	4		GENE-pseudo	388507	ZNF788P	ZNF788P			false	388507	327	0	1	ASSOCIATED_NEW_GENE	0	0.992306	false	0	388507	0		0	[Q6ZQV5]	388507
			3.58362	0			0.Annotation definition not found in 'Homo Sapiens.properties' file	0.Annotation definition not found in 'Homo Sapiens.properties' file	0.279048	1	4	ENSG00000288920	GENE-processed_transcript,protein_coding	388524	RPSAP58	RPSAP58			false	388524	300	0	1	ASSOCIATED_NEW_GENE	0	0.992195	false	0	388524	0		0		388524
			3.57406	0			0.Annotation definition not found in 'Homo Sapiens.properties' file	0.Annotation definition not found in 'Homo Sapiens.properties' file	0.279794	1	4	ENSG00000188848	GENE-protein_coding	389206	BEND4	BEND4			false	389206	307	0	1	ASSOCIATED_NEW_GENE	0	0.992223	false	0	389206	0		0	[A0A0C4DGA9, A0A0C4DGU1, Q6ZU67]	389206
			3.57406	0			3.Intra Cellular	3.Intra Cellular, 5.Nucleus	0.279794	1	4	ENSG00000187772	GENE-protein_coding	389421	LIN28B	LIN28B			false	389421	307	0	1	ASSOCIATED_NEW_GENE	0	0.992223	false	0	389421	0		0	[A0A1B0GTK2, A0A1B0GVD3, A7E2T3, Q6ZN17]	389421
			4.16655	0			2.Plasma Membrane	2.Plasma Membrane, 3.Intra Cellular	0.240007	1	6	ENSG00000009765	GENE-nonsense_mediated_decay,protein_coding,retained_intron	389434	IYD	IYD			false	389434	58	0	1	ASSOCIATED_NEW_GENE	0	0.990433	false	0	389434	0		0	[A0A5P9KEU5, C9JXJ9, F5H543, F6VN83, H7C0X6, Q2VPV9, Q6PHW0]	389434
			3.5413	0			2.Plasma Membrane	2.Plasma Membrane, 3.Intra Cellular	0.282382	1	4	ENSG00000126777	GENE-nonsense_mediated_decay,protein_coding,retained_intron	3895	KTN1	KTN1			false	3895	331	0	1	ASSOCIATED_NEW_GENE	0	0.992322	false	0	3895	0		0	[A0A024R663, B7Z6P3, G3V475, G3V4L8, G3V4Y7, G3V5G2, G3V5P0, G3V5Q0, H0YJB7, H0YJP2, H0YJV5, H0YJZ8, Q3SWV9, Q6NZ46, Q6PDF7, Q86UP2]	3895
			3.57406	0			0.Annotation definition not found in 'Homo Sapiens.properties' file	0.Annotation definition not found in 'Homo Sapiens.properties' file	0.279794	1	4	ENSG00000183808	GENE-processed_transcript,protein_coding	389677	RBM12B	RBM12B			false	389677	307	0	1	ASSOCIATED_NEW_GENE	0	0.992223	false	0	389677	0		0	[B9ZVT1, E5RHG1, E5RJ83, E5RJV8, Q8IXT5]	389677
			3.5413	0			1.Extracellular	1.Extracellular, 2.Plasma Membrane	0.282382	1	4	ENSG00000198910	GENE-processed_transcript,protein_coding,retained_intron	3897	L1CAM	L1CAM			false	3897	331	0	1	ASSOCIATED_NEW_GENE	0	0.992322	false	0	3897	0		0	[E7EMY4, E7EPI4, E7EVM4, E9PHJ4, H0Y5C3, H3BLW5, P32004, Q7Z2F9, Q7Z2H2, Q7Z2I3, Q7Z2J0, Q7Z2J6, Q7Z2J8, Q7Z2J9, Q7Z3Z9, Q86SE4]	3897
			3.54676	0			1.Extracellular	1.Extracellular, 3.Intra Cellular	0.281948	1	4	ENSG00000053747	GENE-non_stop_decay,processed_transcript,protein_coding,retained_intron	3909	LAMA3	LAMA3			false	3909	327	0	1	ASSOCIATED_NEW_GENE	0	0.992306	false	0	3909	0		0	[A0A075B783, A0A0A0MSA0, A0A0A0MTS5, A0A0A6YYF2, A0A3B3ITG1, A0PJJ8, B0YJ32, K7EIP4, K7EMU9, K7EPP3, K7EQ42, K7ERM0, L8E6V6, Q16787, Q566Q1, Q99533]	3909
			3.54676	0			1.Extracellular	1.Extracellular, 2.Plasma Membrane, 3.Intra Cellular	0.281948	1	4	ENSG00000177105	GENE-protein_coding	391	RHOG	RHOG			false	391	327	0	1	ASSOCIATED_NEW_GENE	0	0.992306	false	0	391	0		0	[P84095, Q6ICQ8]	391
			3.5413	0			1.Extracellular	1.Extracellular, 3.Intra Cellular	0.282382	1	4	ENSG00000175220	GENE-protein_coding,retained_intron	392	ARHGAP1	ARHGAP1			false	392	331	0	1	ASSOCIATED_NEW_GENE	0	0.992322	false	0	392	0		0	[E9PNR6, H0YE29, Q07960]	392
			3.5413	0			1.Extracellular	1.Extracellular, 3.Intra Cellular	0.282382	1	4	ENSG00000134333	GENE-nonsense_mediated_decay,protein_coding,retained_intron	3939	LDHA	LDHA			false	3939	331	0	1	ASSOCIATED_NEW_GENE	0	0.992322	false	0	3939	0		0	[F5GWW2, F5GXC7, F5GXH2, F5GXU1, F5GXY2, F5GYU2, F5GZQ4, F5H5J4, F5H6W8, F5H8H6, P00338, V9HWB9]	3939
			3.54676	0			1.Extracellular	1.Extracellular, 2.Plasma Membrane, 3.Intra Cellular	0.281948	1	4	ENSG00000130164	GENE-nonsense_mediated_decay,processed_transcript,protein_coding,retained_intron	3949	LDLR	LDLR			false	3949	327	0	1	ASSOCIATED_NEW_GENE	0	0.992306	false	0	3949	0		0	[A0A024R7D5, A0A0E3KII0, A0A0E3MS57, A0A5B8PB45, A0A6J4DGZ0, A2SZX1, E1B4S5, E1B4T0, E2J5K4, H0YM92, H0YMD1, H0YMQ3, J3KMZ9, P01130, Q9UH51]	3949
			3.54676	0			1.Extracellular	1.Extracellular, 3.Intra Cellular	0.281948	1	4	ENSG00000106003	GENE-protein_coding,retained_intron	3955	LFNG	LFNG			false	3955	327	0	1	ASSOCIATED_NEW_GENE	0	0.992306	false	0	3955	0		0	[A0A087X191, Q8NES3]	3955
			3.99317	0			1.Extracellular	1.Extracellular, 3.Intra Cellular	0.250427	1	6	ENSG00000116977	GENE-nonsense_mediated_decay,protein_coding,retained_intron	3964	LGALS8	LGALS8			false	3964	109	0	1	ASSOCIATED_NEW_GENE	0	0.990957	false	0	3964	0		0	[A0A024R3S4, A0A024R3X1, B1ANM0, B3F166, E9PJ77, E9PN19, E9PNC2, E9PPL1, E9PPM4, E9PRN3, F6V2D4, H7BXD8, L8E9E9, O00214, Q5T3P9, Q96QS7]	3964
			3.5413	0			1.Extracellular	1.Extracellular, 3.Intra Cellular	0.282382	1	4	ENSG00000111348	GENE-processed_transcript,protein_coding,retained_intron	397	ARHGDIB	ARHGDIB			false	397	331	0	1	ASSOCIATED_NEW_GENE	0	0.992322	false	0	397	0		0	[A0A024RAS5, F5H2R5, F5H3P3, F5H6Q0, H0YGX7, P52566]	397
			3.5413	0			3.Intra Cellular	3.Intra Cellular	0.282382	1	4	ENSG00000099204	GENE-processed_transcript,protein_coding,retained_intron	3983	ABLIM1	ABLIM1			false	3983	331	0	1	ASSOCIATED_NEW_GENE	0	0.992322	false	0	3983	0		0	[A0A0A0MRL6, A0A3B3IS55, A0A494C1G0, A0A494C1P1, B3KSG3, B4DQA3, F6XFR5, F8W8M4, H0Y7N6, J3QSX6, O14639]	3983
			3.54676	0			1.Extracellular	1.Extracellular, 3.Intra Cellular	0.281948	1	4	ENSG00000074695	GENE-processed_transcript,protein_coding,retained_intron	3998	LMAN1	LMAN1			false	3998	327	0	1	ASSOCIATED_NEW_GENE	0	0.992306	false	0	3998	0		0	[A0A024R2A7, A0PJ85, P49257]	3998
			3.58362	0			4.Nuclear Membrane	4.Nuclear Membrane	0.279048	1	4	ENSG00000113368	GENE-nonsense_mediated_decay,processed_transcript,protein_coding,retained_intron	4001	LMNB1	LMNB1			false	4001	300	0	1	ASSOCIATED_NEW_GENE	0	0.992195	false	0	4001	0		0	[A0A0D9SFE5, A0A0D9SFY5, B4DZT3, E9PBF6, L0R6K0, P20700, Q6DC98]	4001
			3.54676	0			2.Plasma Membrane	2.Plasma Membrane	0.281948	1	4	ENSG00000165462	GENE-processed_transcript,protein_coding	401	PHOX2A	PHOX2A			false	401	327	0	1	ASSOCIATED_NEW_GENE	0	0.992306	false	0	401	0		0	[H0YGU5, O14813, Q96KQ2]	401
			3.57406	0			1.Extracellular	1.Extracellular, 2.Plasma Membrane	0.279794	1	4	ENSG00000146955	GENE-protein_coding	401409	RAB19	RAB19			false	401409	307	0	1	ASSOCIATED_NEW_GENE	0	0.992223	false	0	401409	0		0	[A4D1S5]	401409
			4.06689	0			3.Intra Cellular	3.Intra Cellular	0.245888	1	6	ENSG00000148158	GENE-processed_transcript,protein_coding	401548	SNX30	SNX30			false	401548	108	0	1	ASSOCIATED_NEW_GENE	0	0.990734	false	0	401548	0		0	[H0Y496, Q5VWJ9]	401548
			4.07235	0	Transcription Factor Complex		0.Annotation definition not found in 'Homo Sapiens.properties' file	0.Annotation definition not found in 'Homo Sapiens.properties' file	0.245558	1	6	ENSG00000230797	GENE-protein_coding	404281	YY2	YY2			false	404281	46	0	1	ASSOCIATED_NEW_GENE	0	0.990718	false	0	404281	0		0	[O15391]	404281
			3.57406	0			1.Extracellular	1.Extracellular, 2.Plasma Membrane, 3.Intra Cellular	0.279794	1	4	ENSG00000254087	GENE-processed_transcript,protein_coding	4067	LYN	LYN			false	4067	307	0	1	ASSOCIATED_NEW_GENE	0	0.992223	false	0	4067	0		0	[A8K379, E5RJ37, P07948, Q6NUK7]	4067
			4.16655	0			3.Intra Cellular	3.Intra Cellular	0.240007	1	6	ENSG00000183918	GENE-nonsense_mediated_decay,processed_transcript,protein_coding	4068	SH2D1A	SH2D1A			false	4068	58	0	1	ASSOCIATED_NEW_GENE	0	0.990433	false	0	4068	0		0	[A0A2R8Y573, K7XSE5, K7XXT7, K7YQB3, O60880]	4068
			3.58362	0			1.Extracellular	1.Extracellular, 2.Plasma Membrane, 3.Intra Cellular	0.279048	1	4	ENSG00000277443	GENE-protein_coding	4082	MARCKS	MARCKS			false	4082	300	0	1	ASSOCIATED_NEW_GENE	0	0.992195	false	0	4082	0		0	[P29966, Q05C82, Q6NVI1]	4082
			3.57406	0	Transcription Factor Complex		3.Intra Cellular	3.Intra Cellular	0.279794	1	4	ENSG00000059728	GENE-nonsense_mediated_decay,processed_transcript,protein_coding,retained_intron	4084	MXD1	MXD1			false	4084	307	0	1	ASSOCIATED_NEW_GENE	0	0.992223	false	0	4084	0		0	[B7ZLI7, C9JBE8, F8WBI0, Q05195]	4084
			3.54676	0	Transcription Factor Complex		3.Intra Cellular	3.Intra Cellular	0.281948	1	4	ENSG00000175387	GENE-processed_transcript,protein_coding	4087	SMAD2	SMAD2			false	4087	327	0	1	ASSOCIATED_NEW_GENE	0	0.992306	false	0	4087	0		0	[B7Z5N5, K7EJX0, K7EL92, K7ERC7, K7ESI8, Q15796, Q53XR6]	4087
			3.54676	0			2.Plasma Membrane	2.Plasma Membrane, 3.Intra Cellular	0.281948	1	4	ENSG00000141480	GENE-nonsense_mediated_decay,processed_transcript,protein_coding,retained_intron	409	ARRB2	ARRB2			false	409	327	0	1	ASSOCIATED_NEW_GENE	0	0.992306	false	0	409	0		0	[I3L0V6, I3L1M6, I3L412, K7EL17, K7ENA6, L8ECB1, P32121, Q59EM5, Q68DZ5]	409
			3.5413	0			0.Annotation definition not found in 'Homo Sapiens.properties' file	0.Annotation definition not found in 'Homo Sapiens.properties' file	0.282382	1	4	ENSG00000268606	GENE-protein_coding	4101	MAGEA2	MAGEA2			false	4101	331	0	1	ASSOCIATED_NEW_GENE	0	0.992322	false	0	4101	0		0	[A0A024RC17, A0A087WZT8, E7ENJ0, P43356, Q2VPA5, Q6P448]	4101
			3.5413	0			3.Intra Cellular	3.Intra Cellular	0.282382	1	4	ENSG00000221867	GENE-protein_coding	4102	MAGEA3	MAGEA3			false	4102	331	0	1	ASSOCIATED_NEW_GENE	0	0.992322	false	0	4102	0		0	[E7EMU0, P43357]	4102
			3.5413	0			0.Annotation definition not found in 'Homo Sapiens.properties' file	0.Annotation definition not found in 'Homo Sapiens.properties' file	0.282382	1	4	ENSG00000197172	GENE-protein_coding	4105	MAGEA6	MAGEA6			false	4105	331	0	1	ASSOCIATED_NEW_GENE	0	0.992322	false	0	4105	0		0	[E7ETG4, E7EUF2, P43360, Q6FGT7, Q6FHI5]	4105
			3.5413	0			0.Annotation definition not found in 'Homo Sapiens.properties' file	0.Annotation definition not found in 'Homo Sapiens.properties' file	0.282382	1	4	ENSG00000213401	GENE-protein_coding	4111	MAGEA12	MAGEA12			false	4111	331	0	1	ASSOCIATED_NEW_GENE	0	0.992322	false	0	4111	0		0	[P43365]	4111
			3.58362	0			2.Plasma Membrane	2.Plasma Membrane, 3.Intra Cellular	0.279048	1	4	ENSG00000101846	GENE-nonsense_mediated_decay,processed_transcript,protein_coding	412	STS	STS			false	412	300	0	1	ASSOCIATED_NEW_GENE	0	0.992195	false	0	412	0		0	[A0A590UJL0, A0A590UJT4, A0A590UJY9, A6PYA4, C7BWB5, P08842, Q0W975, Q16244]	412
			3.99317	0			2.Plasma Membrane	2.Plasma Membrane, 3.Intra Cellular	0.250427	1	6	ENSG00000197971	GENE-nonsense_mediated_decay,processed_transcript,protein_coding,retained_intron	4155	MBP	MBP			false	4155	109	0	1	ASSOCIATED_NEW_GENE	0	0.990957	false	0	4155	0		0	[A0A024R384, A8MZH3, C9J6H1, E9PJ72, E9PKX9, E9PLQ9, E9PLU9, E9PMR5, E9PNZ1, E9PQE7, E9PSE2, F5H7N4, F8WEU6, H0YEA2, H0YF02, H7BYR8, J3KS94, J3KT01, J3KT34, J3QKL5, J3QKN5, J3QL64, J3QQK6, P02686]	4155
			3.54676	0			1.Extracellular	1.Extracellular, 2.Plasma Membrane, 3.Intra Cellular	0.281948	1	4	ENSG00000117335	GENE-nonsense_mediated_decay,processed_transcript,protein_coding,retained_intron	4179	CD46	CD46			false	4179	327	0	1	ASSOCIATED_NEW_GENE	0	0.992306	false	0	4179	0		0	[P15529, Q06C42, R4GN18]	4179
			3.99317	0	Transcription Factor Complex		2.Plasma Membrane	2.Plasma Membrane, 3.Intra Cellular, 5.Nucleus	0.250427	1	6	ENSG00000135679	GENE-nonsense_mediated_decay,processed_transcript,protein_coding,retained_intron	4193	MDM2	MDM2			false	4193	109	0	1	ASSOCIATED_NEW_GENE	0	0.990957	false	0	4193	0		0	[A0A0A8K972, A0A0A8K975, A0A0A8K978, A0A0A8K982, A0A0A8K986, A0A0A8K992, A0A0A8K9A1, A0A0A8K9A4, A0A0A8K9G1, A0A0A8K9G9, A0A0A8K9H4, A0A0A8K9H7, A0A0A8K9I1, A0A0A8KA03, A0A0A8KA06, A0A0A8KA17, A0A0A8KB67, A0A0A8KB70, A0A0A8KB75, A0A0A8KB78, A0A0A8KB88, A0A0A8KB92, A0A0A8KB97, A0A0A8KBA1, A0A0C4DFR5, A0A1B0GXJ6, A7UKX7, A7UKX8, A7UKX9, A8WFP2, D0EKL1, E5RHE2, E5RJQ0, E7EMW5, E7EPE2, F5GWH7, F5GZB0…	4193
			3.57406	0			0.Annotation definition not found in 'Homo Sapiens.properties' file	0.Annotation definition not found in 'Homo Sapiens.properties' file	0.279794	1	4		GENE-pseudo	4213	MEIS3P1	MEIS3P1			false	4213	307	0	1	ASSOCIATED_NEW_GENE	0	0.992223	false	0	4213	0		0	[A6NDR6]	4213
			3.54676	0			3.Intra Cellular	3.Intra Cellular	0.281948	1	4	ENSG00000198909	GENE-nonsense_mediated_decay,processed_transcript,protein_coding,retained_intron	4215	MAP3K3	MAP3K3			false	4215	327	0	1	ASSOCIATED_NEW_GENE	0	0.992306	false	0	4215	0		0	[J3KRN4, J3KTC4, J3QRB6, J3QS19, J3QS54, Q1PBM3, Q96HN9, Q99759]	4215
			3.54676	0			3.Intra Cellular	3.Intra Cellular	0.281948	1	4	ENSG00000130758	GENE-nonsense_mediated_decay,processed_transcript,protein_coding,retained_intron	4294	MAP3K10	MAP3K10			false	4294	327	0	1	ASSOCIATED_NEW_GENE	0	0.992306	false	0	4294	0		0	[M0R0A7, M0R1J8, M0R365, Q02779]	4294
			3.57406	0			3.Intra Cellular	3.Intra Cellular	0.279794	1	4	ENSG00000118058	GENE-nonsense_mediated_decay,processed_transcript,protein_coding,retained_intron	4297	KMT2A	KMT2A			false	4297	307	0	1	ASSOCIATED_NEW_GENE	0	0.992223	false	0	4297	0		0	[A0A3B3ISN4, A0A3B3ITT0, A0A3B3ITT7, A0A3B3ITZ6, A0A3S6YZ73, A0A4D6WIU0, A0A4D6WLI1, A0A4D6WQ80, A0A7G9ZE50, A0A8F7GQG2, E9PR05, H0YEU4, H7C5V8, H7C5W4, Q03164]	4297
			3.58362	0			0.Annotation definition not found in 'Homo Sapiens.properties' file	0.Annotation definition not found in 'Homo Sapiens.properties' file	0.279048	1	4	ENSG00000275023	GENE-processed_transcript,protein_coding,retained_intron	4302	MLLT6	MLLT6			false	4302	300	0	1	ASSOCIATED_NEW_GENE	0	0.992195	false	0	4302	0		0	[A0A024R1V5, A0A087WVY1, A0A4D6WK60, P55198, Q6P2C6, Q96I32]	4302
			3.58362	0			3.Intra Cellular	3.Intra Cellular	0.279048	1	4	ENSG00000115204	GENE-nonsense_mediated_decay,processed_transcript,protein_coding,retained_intron	4358	MPV17	MPV17			false	4358	300	0	1	ASSOCIATED_NEW_GENE	0	0.992195	false	0	4358	0		0	[A0A0S2Z3Z9, A0A0S2Z466, A0A0S2Z469, A8MPV4, A8MTD3, B5MC10, B5MC53, B5MCF8, C9J473, D6W556, E7EX18, F8WEL3, G5E9F5, H0Y6M5, P39210, Q9UPC7]	4358
			3.58362	0			1.Extracellular	1.Extracellular, 2.Plasma Membrane	0.279048	1	4	ENSG00000103222	GENE-nonsense_mediated_decay,processed_transcript,protein_coding,retained_intron	4363	ABCC1	ABCC1			false	4363	300	0	1	ASSOCIATED_NEW_GENE	0	0.992195	false	0	4363	0		0	[A0A0A0MS99, A0A7I2V2E0, A0A7I2V4C6, G0ZCM3, G0ZCM4, G0ZCM5, G0ZCM6, I3L4X2, P33527]	4363
			3.54676	0			3.Intra Cellular	3.Intra Cellular	0.281948	1	4	ENSG00000215252	GENE-processed_transcript,protein_coding,retained_intron	440270	GOLGA8B	GOLGA8B			false	440270	327	0	1	ASSOCIATED_NEW_GENE	0	0.992306	false	0	440270	0		0	[A8MQT2, B7ZKM1, B7ZMK6, C9J1B5]	440270
			4.06689	0			1.Extracellular	1.Extracellular, 2.Plasma Membrane, 3.Intra Cellular	0.245888	1	6	ENSG00000147065	GENE-processed_transcript,protein_coding	4478	MSN	MSN			false	4478	108	0	1	ASSOCIATED_NEW_GENE	0	0.990734	false	0	4478	0		0	[P26038, Q6PJT4, V9GZ54, V9HWC0]	4478
			4.07235	0	Transcription Factor Complex		3.Intra Cellular	3.Intra Cellular	0.245558	1	6	ENSG00000120149	GENE-protein_coding	4488	MSX2	MSX2			false	4488	46	0	1	ASSOCIATED_NEW_GENE	0	0.990718	false	0	4488	0		0	[D6RIS4, P35548]	4488
			3.58362	0			3.Intra Cellular	3.Intra Cellular	0.279048	1	4	ENSG00000198804	GENE-protein_coding	4512	COX1	COX1			false	4512	300	0	1	ASSOCIATED_NEW_GENE	0	0.992195	false	0	4512	0		0	[A0A023I8C2, A0A023I8E0, A0A023I8X8, A0A023I9A1, A0A023Q2F1, A0A023Q2M3, A0A023Q3I2, A0A023Q3L7, A0A023Q488, A0A023Q4H9, A0A023Q4U0, A0A023Q552, A0A023Q5F4, A0A023Q7P2, A0A023Q8B2, A0A023QBJ9, A0A023QGP7, A0A023QQ48, A0A023QR89, A0A023QT24, A0A023QT79, A0A023QUI5, A0A023QUR1, A0A023QYP8, A0A023QZ55, A0A023R5A9, A0A023R6I9, A0A023RCN6, A0A059QBD7, A0A059QBJ1, A0A059QC17, A0A059QC55, A0A059QD37, A0…	4512
			3.54676	0			3.Intra Cellular	3.Intra Cellular	0.281948	1	4	ENSG00000198763	GENE-protein_coding	4536	ND2	ND2			false	4536	327	0	1	ASSOCIATED_NEW_GENE	0	0.992306	false	0	4536	0		0	[A0A023I7J4, A0A023I845, A0A023I9B6, A0A023Q460, A0A023Q694, A0A023Q8P7, A0A023QBA5, A0A023QCK0, A0A023QCY0, A0A023QFX6, A0A023QHC9, A0A023QIP2, A0A023QK46, A0A023QZJ5, A0A023ZSE2, A0A023ZT78, A0A059QB50, A0A059QCT2, A0A059QET0, A0A059QFL0, A0A059QGX8, A0A059QJD2, A0A059QJT8, A0A059QK46, A0A059QKI7, A0A059QM62, A0A059QQ15, A0A059QQ67, A0A059QQ92, A0A059QQH1, A0A059QQR5, A0A059QRK8, A0A059QSG3, A0…	4536
			4.07099	0			3.Intra Cellular	3.Intra Cellular	0.245641	1	6	ENSG00000198695	GENE-protein_coding	4541	ND6	ND6			false	4541	48	0	1	ASSOCIATED_NEW_GENE	0	0.990722	false	0	4541	0		0	[A0A023I7W4, A0A023I852, A0A023I8N0, A0A023I8P3, A0A023Q568, A0A023QFF6, A0A023QQE5, A0A023QRK5, A0A023QX54, A0A023R385, A0A023R5S7, A0A059QF73, A0A059QLG0, A0A059QPR0, A0A059QQW3, A0A059QTJ2, A0A059RBF9, A0A059RG71, A0A059RI68, A0A059RIA0, A0A059RJ10, A0A059RMZ8, A0A059RNN8, A0A059RNZ2, A0A059RR87, A0A059S6I0, A0A068BPU9, A0A068C695, A0A075C7T2, A0A075X6N0, A0A096W049, A0A096WNH2, A0A097Q221, A0…	4541
			4.36724	0	Transcription Factor Complex		3.Intra Cellular	3.Intra Cellular, 5.Nucleus	0.228978	1	6	ENSG00000119950	GENE-nonsense_mediated_decay,processed_transcript,protein_coding	4601	MXI1	MXI1			false	4601	31	0	1	ASSOCIATED_NEW_GENE	0	0.989827	false	0	4601	0		0	[A0A0S2Z3X5, A0A0S2Z3Y0, A0A0S2Z429, A0A494BZS3, A0A494C0I8, A0A494C0W2, A0A494C1C1, A0A494C1P8, B1ANN8, F6U3F6, F6WCI9, P50539, Q5V9L6]	4601
			3.57406	0			3.Intra Cellular	3.Intra Cellular	0.279794	1	4	ENSG00000187109	GENE-nonsense_mediated_decay,protein_coding,retained_intron	4673	NAP1L1	NAP1L1			false	4673	307	0	1	ASSOCIATED_NEW_GENE	0	0.992223	false	0	4673	0		0	[A0A024RBB7, A0A024RBE6, B7Z2V4, B7Z4K9, B7Z9C2, F5H4R6, F8VRJ2, F8VUX1, F8VV59, F8VVB5, F8VXI6, F8VY35, F8W020, F8W0J6, F8W118, F8W543, H0YH88, H0YHC3, H0YIV4, P55209, Q9H2B0]	4673
			3.54676	0			3.Intra Cellular	3.Intra Cellular, 5.Nucleus	0.281948	1	4	ENSG00000149311	GENE-nonsense_mediated_decay,processed_transcript,protein_coding,retained_intron	472	ATM	ATM			false	472	327	0	1	ASSOCIATED_NEW_GENE	0	0.992306	false	0	472	0		0	[A0A024R3C7, A0A087X0E9, A0A6Q8PH76, A0A804HL86, A8WFP7, E2I6F3, E9PIN0, E9PRG7, H0YDU7, H0YEC6, M0QXY8, Q13315, Q6P7P1, Q8TDS0, Q8TDS1, Q8TDS2, Q96QM9]	472
			3.58362	0			3.Intra Cellular	3.Intra Cellular	0.279048	1	4	ENSG00000160194	GENE-processed_transcript,protein_coding	4731	NDUFV3	NDUFV3			false	4731	300	0	1	ASSOCIATED_NEW_GENE	0	0.992195	false	0	4731	0		0	[P56181]	4731
			3.54676	0			1.Extracellular	1.Extracellular, 2.Plasma Membrane, 3.Intra Cellular	0.281948	1	4	ENSG00000168385	GENE-nonsense_mediated_decay,processed_transcript,protein_coding,retained_intron	4735	SEPTIN2	SEPTIN2			false	4735	327	0	1	ASSOCIATED_NEW_GENE	0	0.992306	false	0	4735	0		0	[A0A1B0GXJ2, A0A384N6H6, B5MCX3, B5MD47, C9IY94, C9IZU3, C9J2Q4, C9J938, C9JB25, C9JFT1, C9JG93, C9JQJ4, C9JSE7, C9JT15, C9JZI2, F8WB65, F8WCX3, H7C1T1, H7C2Y0, H7C310, Q15019]	4735
			3.58362	0			1.Extracellular	1.Extracellular, 2.Plasma Membrane, 3.Intra Cellular	0.279048	1	4	ENSG00000163399	GENE-processed_transcript,protein_coding,retained_intron	476	ATP1A1	ATP1A1			false	476	300	0	1	ASSOCIATED_NEW_GENE	0	0.992195	false	0	476	0		0	[A0A2H4Y9T5, L0R4U4, P05023, Q13818, Q58I23, Q5TC01, Q5TC02, Q5TC05]	476
			3.54676	0	Transcription Factor Complex		0.Annotation definition not found in 'Homo Sapiens.properties' file	0.Annotation definition not found in 'Homo Sapiens.properties' file	0.281948	1	4	ENSG00000120837	GENE-protein_coding,retained_intron	4801	NFYB	NFYB			false	4801	327	0	1	ASSOCIATED_NEW_GENE	0	0.992306	false	0	4801	0		0	[A0A024RBG7, F8VSL3, P25208]	4801
			3.58362	0			5.Nucleus	5.Nucleus	0.279048	1	4	ENSG00000100138	GENE-nonsense_mediated_decay,processed_transcript,protein_coding	4809	SNU13	SNU13			false	4809	300	0	1	ASSOCIATED_NEW_GENE	0	0.992195	false	0	4809	0		0	[A0A3B3IRU2, A0A3B3ISH1, A0A3B3ISH9, A0A3B3ISK4, A0A3B3IUA2, B1AHD1, P55769, Q6FHM6]	4809
			4.36724	0			1.Extracellular	1.Extracellular, 2.Plasma Membrane	0.228978	1	6	ENSG00000131669	GENE-processed_transcript,protein_coding	4814	NINJ1	NINJ1			false	4814	31	0	1	ASSOCIATED_NEW_GENE	0	0.989827	false	0	4814	0		0	[A0A0F6X1D7, Q92982]	4814
			3.58362	0			2.Plasma Membrane	2.Plasma Membrane, 3.Intra Cellular	0.279048	1	4	ENSG00000136448	GENE-nonsense_mediated_decay,processed_transcript,protein_coding,retained_intron	4836	NMT1	NMT1			false	4836	300	0	1	ASSOCIATED_NEW_GENE	0	0.992195	false	0	4836	0		0	[A0A7I2V3M5, A0A7I2V3U5, A0A7I2V3X4, A0A7I2V4Y5, A0A7I2V539, A0A7I2V5J6, A0A7I2V5M6, A4FU65, B7Z8J4, K7EN42, K7EN82, P30419, Q96HI4]	4836
			4.06689	0			1.Extracellular	1.Extracellular, 3.Intra Cellular	0.245888	1	6	ENSG00000198805	GENE-protein_coding,retained_intron	4860	PNP	PNP			false	4860	108	0	1	ASSOCIATED_NEW_GENE	0	0.990734	false	0	4860	0		0	[G3V2H3, G3V393, G3V5M2, P00491, V9HWH6]	4860
			3.58362	0			3.Intra Cellular	3.Intra Cellular, 5.Nucleus	0.279048	1	4	ENSG00000181163	GENE-nonsense_mediated_decay,protein_coding,retained_intron	4869	NPM1	NPM1			false	4869	300	0	1	ASSOCIATED_NEW_GENE	0	0.992195	false	0	4869	0		0	[A0A0S2Z491, A0A0S2Z4G7, A0A140VJQ2, A0A7I2V2X9, A0A7I2V3G5, A0A7I2V3U2, A0A7I2V433, A0A7I2V4G8, A0A7I2V579, A0A7I2V5J8, A0A7I2V5S2, A0A7I2YQC0, A4ZU86, B1PHD4, E5RGW4, E5RI98, P06748, Q9BTI9]	4869
			4.36724	0			1.Extracellular	1.Extracellular, 2.Plasma Membrane, 3.Intra Cellular	0.228978	1	6	ENSG00000171246	GENE-processed_transcript,protein_coding,retained_intron	4884	NPTX1	NPTX1			false	4884	31	0	1	ASSOCIATED_NEW_GENE	0	0.989827	false	0	4884	0		0	[Q15818]	4884
			4.07235	0			1.Extracellular	1.Extracellular	0.245558	1	6	ENSG00000106236	GENE-protein_coding,retained_intron	4885	NPTX2	NPTX2			false	4885	46	0	1	ASSOCIATED_NEW_GENE	0	0.990718	false	0	4885	0		0	[P47972]	4885
			3.99317	0			3.Intra Cellular	3.Intra Cellular, 4.Nuclear Membrane	0.250427	1	6	ENSG00000074370	GENE-protein_coding,retained_intron	489	ATP2A3	ATP2A3			false	489	109	0	1	ASSOCIATED_NEW_GENE	0	0.990957	false	0	489	0		0	[A0A0C4DGN1, A0A0C4DGN3, A8K9K1, Q93084]	489
			3.57406	0			1.Extracellular	1.Extracellular, 2.Plasma Membrane, 3.Intra Cellular	0.279794	1	4	ENSG00000110911	GENE-nonsense_mediated_decay,processed_transcript,protein_coding,retained_intron	4891	SLC11A2	SLC11A2			false	4891	307	0	1	ASSOCIATED_NEW_GENE	0	0.992223	false	0	4891	0		0	[A0A0A1E835, A0A0H3W5I8, A0A0H3W5U4, A0A0X8GKR4, A0A2R8Y4F9, A0A2R8Y5L1, A0A2R8Y5Q7, A0A2R8YD71, A0A2R8YDL2, A0A7P0T8E3, B3KY44, F8VR36, F8VRL7, F8VWB0, F8W154, F8W1C0, F8W1D8, F8W1F2, F8W1P7, H0YIV3, P49281]	4891
			3.54676	0			1.Extracellular	1.Extracellular, 2.Plasma Membrane, 3.Intra Cellular	0.281948	1	4	ENSG00000070961	GENE-protein_coding,retained_intron	490	ATP2B1	ATP2B1			false	490	327	0	1	ASSOCIATED_NEW_GENE	0	0.992306	false	0	490	0		0	[A0A024RBC7, A0A0U1RQU3, A1X4P7, E7ERY9, F8W1V5, H0YHH6, P20020, Q3L582, Q58F24]	490
			4.16655	0			3.Intra Cellular	3.Intra Cellular	0.240007	1	6	ENSG00000129535	GENE-protein_coding	4901	NRL	NRL			false	4901	58	0	1	ASSOCIATED_NEW_GENE	0	0.990433	false	0	4901	0		0	[H0YNW2, P54845]	4901
			3.57406	0			1.Extracellular	1.Extracellular, 2.Plasma Membrane, 3.Intra Cellular	0.279794	1	4	ENSG00000070081	GENE-nonsense_mediated_decay,processed_transcript,protein_coding,retained_intron	4925	NUCB2	NUCB2			false	4925	307	0	1	ASSOCIATED_NEW_GENE	0	0.992223	false	0	4925	0		0	[A0A097EV82, A0A1B0GXJ7, A0A2R8Y6G7, A7LNF3, A7LNF4, A7LNF5, E9PJP3, E9PKG6, E9PLE9, E9PLR0, E9PLR5, E9PM22, E9PRQ3, H0YD18, H0YEG8, P80303, Q2L696]	4925
			4.06689	0	Transcription Factor Complex		3.Intra Cellular	3.Intra Cellular	0.245888	1	6	ENSG00000153234	GENE-nonsense_mediated_decay,protein_coding	4929	NR4A2	NR4A2			false	4929	108	0	1	ASSOCIATED_NEW_GENE	0	0.990734	false	0	4929	0		0	[A0A0S2Z418, C0KWD1, C0KWD2, C9IYM5, C9J8W4, C9JWQ1, E9PBQ4, F1D8N6, F1DAL2, F8W6I3, H7BZ00, P43354, Q53EL4]	4929
			4.06689	0			0.Annotation definition not found in 'Homo Sapiens.properties' file	0.Annotation definition not found in 'Homo Sapiens.properties' file	0.245888	1	6	ENSG00000213516	GENE-protein_coding	494115	RBMXL1	RBMXL1			false	494115	108	0	1	ASSOCIATED_NEW_GENE	0	0.990734	false	0	494115	0		0	[A0A1B0GUK8, Q96E39]	494115
			4.16655	0			0.Annotation definition not found in 'Homo Sapiens.properties' file	0.Annotation definition not found in 'Homo Sapiens.properties' file	0.240007	1	6	ENSG00000204952	GENE-protein_coding	494188	FBXO47	FBXO47			false	494188	58	0	1	ASSOCIATED_NEW_GENE	0	0.990433	false	0	494188	0		0	[Q5MNV8]	494188
			4.07099	0			3.Intra Cellular	3.Intra Cellular	0.245641	1	6	ENSG00000065154	GENE-processed_transcript,protein_coding	4942	OAT	OAT			false	4942	48	0	1	ASSOCIATED_NEW_GENE	0	0.990722	false	0	4942	0		0	[A0A140VJQ4, P04181]	4942
			3.54676	0			3.Intra Cellular	3.Intra Cellular	0.281948	1	4	ENSG00000104044	GENE-processed_transcript,protein_coding	4948	OCA2	OCA2			false	4948	327	0	1	ASSOCIATED_NEW_GENE	0	0.992306	false	0	4948	0		0	[A0A0G2JPT4, A0A0J9YWU3, A0A0J9YXL8, C9JDV3, C9JLG9, Q04671]	4948
			3.58362	0			1.Extracellular	1.Extracellular, 2.Plasma Membrane, 3.Intra Cellular	0.279048	1	4	ENSG00000152234	GENE-nonsense_mediated_decay,processed_transcript,protein_coding,retained_intron	498	ATP5F1A	ATP5F1A			false	498	300	0	1	ASSOCIATED_NEW_GENE	0	0.992195	false	0	498	0		0	[A0A0A0MTS3, K7EJP1, K7EK77, K7EKV9, K7EM08, K7ENJ4, K7EQH4, K7EQU6, K7ERX7, K7ESA0, P25705, V9HW26]	498
			3.54676	0			1.Extracellular	1.Extracellular, 2.Plasma Membrane	0.281948	1	4	ENSG00000164761	GENE-nonsense_mediated_decay,protein_coding,retained_intron	4982	TNFRSF11B	TNFRSF11B			false	4982	327	0	1	ASSOCIATED_NEW_GENE	0	0.992306	false	0	4982	0		0	[E5RFV7, O00300]	4982
			3.57406	0			2.Plasma Membrane	2.Plasma Membrane, 3.Intra Cellular	0.279794	1	4	ENSG00000125510	GENE-protein_coding	4987	OPRL1	OPRL1			false	4987	307	0	1	ASSOCIATED_NEW_GENE	0	0.992223	false	0	4987	0		0	[A0A0G2JQE4, A0A5F9ZI64, A0A6H0W9J6, A0A6H0WB77, A0A6H0WF25, P41146, Q6FGM5, Q8IXB0]	4987
			3.54676	0	Transcription Factor Complex		0.Annotation definition not found in 'Homo Sapiens.properties' file	0.Annotation definition not found in 'Homo Sapiens.properties' file	0.281948	1	4	ENSG00000184302	GENE-protein_coding	4990	SIX6	SIX6			false	4990	327	0	1	ASSOCIATED_NEW_GENE	0	0.992306	false	0	4990	0		0	[A0A0H3W5E5, A0A0H3W5H1, A0A0H3W5J9, A0A0H3W5R8, A0A127AXL1, A0A1B3B2J1, A0A1B3B2J6, A0A1B3B2K2, A0A1B3B2M0, O95475, Q5M8S8, Q6P051]	4990
			3.54676	0			0.Annotation definition not found in 'Homo Sapiens.properties' file	0.Annotation definition not found in 'Homo Sapiens.properties' file	0.281948	1	4	ENSG00000165588	GENE-protein_coding	5015	OTX2	OTX2			false	5015	327	0	1	ASSOCIATED_NEW_GENE	0	0.992306	false	0	5015	0		0	[A0A0A7NV24, A0A0A7NV78, A0A0H3W5K0, A0A0H3W5S0, A0A0Y0SBK5, A0A0Y0SMK7, A0A5F9ZHY1, F1T0C9, F1T0D0, F1T0D1, G3V3J3, G3V3P9, P32243]	5015
			3.54676	0			1.Extracellular	1.Extracellular, 3.Intra Cellular	0.281948	1	4	ENSG00000089220	GENE-processed_transcript,protein_coding	5037	PEBP1	PEBP1			false	5037	327	0	1	ASSOCIATED_NEW_GENE	0	0.992306	false	0	5037	0		0	[D9IAI1, P30086]	5037
			3.57406	0			3.Intra Cellular	3.Intra Cellular	0.279794	1	4	ENSG00000158006	GENE-processed_transcript,protein_coding	5051	PAFAH2	PAFAH2			false	5051	307	0	1	ASSOCIATED_NEW_GENE	0	0.992223	false	0	5051	0		0	[Q5SY00, Q5SY01, Q99487]	5051
			3.58362	0			1.Extracellular	1.Extracellular, 3.Intra Cellular	0.279048	1	4	ENSG00000117450	GENE-protein_coding	5052	PRDX1	PRDX1			false	5052	300	0	1	ASSOCIATED_NEW_GENE	0	0.992195	false	0	5052	0		0	[A0A0A0MRQ5, A0A0A0MSI0, A0A384NPQ2, Q06830]	5052
			3.54676	0	Transcription Factor Complex		0.Annotation definition not found in 'Homo Sapiens.properties' file	0.Annotation definition not found in 'Homo Sapiens.properties' file	0.281948	1	4	ENSG00000167081	GENE-nonsense_mediated_decay,processed_transcript,protein_coding,retained_intron	5090	PBX3	PBX3			false	5090	327	0	1	ASSOCIATED_NEW_GENE	0	0.992306	false	0	5090	0		0	[A0A024R864, H0Y5D0, H3BLX0, P40426, Q5JS98, Q96AL5, U3KQA2]	5090
			3.5413	0			1.Extracellular	1.Extracellular, 3.Intra Cellular	0.282382	1	4	ENSG00000197111	GENE-nonsense_mediated_decay,protein_coding,retained_intron	5094	PCBP2	PCBP2			false	5094	331	0	1	ASSOCIATED_NEW_GENE	0	0.992322	false	0	5094	0		0	[A0A384N6B9, F8VRH0, F8VTZ0, F8VXH9, F8VZX2, F8W0G4, F8W1G6, H3BND9, H3BRU6, H3BSP4, H3BSS4, L8E745, Q15366]	5094
			3.57406	0			3.Intra Cellular	3.Intra Cellular	0.279794	1	4	ENSG00000117500	GENE-nonsense_mediated_decay,processed_transcript,protein_coding	50999	TMED5	TMED5			false	50999	307	0	1	ASSOCIATED_NEW_GENE	0	0.992223	false	0	50999	0		0	[B1AKT3, M0R072, Q49AG2, Q9Y3A6]	50999
			3.99317	0			2.Plasma Membrane	2.Plasma Membrane	0.250427	1	6	ENSG00000184226	GENE-nonsense_mediated_decay,processed_transcript,protein_coding	5101	PCDH9	PCDH9			false	5101	109	0	1	ASSOCIATED_NEW_GENE	0	0.990957	false	0	5101	0		0	[A0A087WZW0, A7E2D9, B7ZM79, Q5VT82, Q9HC56, X5D7N0]	5101
			3.58362	0			3.Intra Cellular	3.Intra Cellular	0.279048	1	4	ENSG00000134970	GENE-processed_transcript,protein_coding	51014	TMED7	TMED7			false	51014	300	0	1	ASSOCIATED_NEW_GENE	0	0.992195	false	0	51014	0		0	[G3V2Y2, Q3B7W7, Q9Y3B3]	51014
			3.57406	0			1.Extracellular	1.Extracellular, 3.Intra Cellular	0.279794	1	4	ENSG00000111711	GENE-nonsense_mediated_decay,processed_transcript,protein_coding,retained_intron	51026	GOLT1B	GOLT1B			false	51026	307	0	1	ASSOCIATED_NEW_GENE	0	0.992223	false	0	51026	0		0	[F5GWD8, F5GXH6, F5H6U7, G3V1U5, Q9Y3E0]	51026
			4.07235	0			3.Intra Cellular	3.Intra Cellular	0.245558	1	6	ENSG00000072756	GENE-nonsense_mediated_decay,processed_transcript,protein_coding,retained_intron	51095	TRNT1	TRNT1			false	51095	46	0	1	ASSOCIATED_NEW_GENE	0	0.990718	false	0	51095	0		0	[A0A024R2H7, A0A494BZV5, A0A494C0A0, A0A494C0N8, A0A494C0Y2, A0A494C181, A0A494C1D4, A0A494C1L4, A0A494C1P4, C9JRS7, F8W8C3, Q96Q11]	51095
			3.57406	0			3.Intra Cellular	3.Intra Cellular	0.279794	1	4	ENSG00000173418	GENE-processed_transcript,protein_coding,retained_intron	51126	NAA20	NAA20			false	51126	307	0	1	ASSOCIATED_NEW_GENE	0	0.992223	false	0	51126	0		0	[A8MZB2, P61599]	51126
			3.54676	0	Transcription Factor Complex		3.Intra Cellular	3.Intra Cellular	0.281948	1	4	ENSG00000131263	GENE-protein_coding	51132	RLIM	RLIM			false	51132	327	0	1	ASSOCIATED_NEW_GENE	0	0.992306	false	0	51132	0		0	[L0R533, Q9NVW2]	51132
			3.54676	0			2.Plasma Membrane	2.Plasma Membrane	0.281948	1	4	ENSG00000136636	GENE-processed_transcript,protein_coding	51133	KCTD3	KCTD3			false	51133	327	0	1	ASSOCIATED_NEW_GENE	0	0.992306	false	0	51133	0		0	[H0Y566, H0Y5P8, L0R4Z3, Q9Y597]	51133
			3.57406	0			3.Intra Cellular	3.Intra Cellular	0.279794	1	4	ENSG00000189050	GENE-nonsense_mediated_decay,protein_coding,retained_intron	51136	RNFT1	RNFT1			false	51136	307	0	1	ASSOCIATED_NEW_GENE	0	0.992223	false	0	51136	0		0	[E9PI44, H0YEZ8, K7EJ18, Q5M7Z0]	51136
			3.5413	0	Transcription Factor Complex		3.Intra Cellular	3.Intra Cellular	0.282382	1	4	ENSG00000138795	GENE-nonsense_mediated_decay,processed_transcript,protein_coding,retained_intron	51176	LEF1	LEF1			false	51176	331	0	1	ASSOCIATED_NEW_GENE	0	0.992322	false	0	51176	0		0	[D6RAB1, D6RID7, D6RIV1, G9G139, Q659G9, Q9UJU2]	51176
			3.57406	0			2.Plasma Membrane	2.Plasma Membrane, 3.Intra Cellular	0.279794	1	4	ENSG00000023902	GENE-processed_transcript,protein_coding,retained_intron	51177	PLEKHO1	PLEKHO1			false	51177	307	0	1	ASSOCIATED_NEW_GENE	0	0.992223	false	0	51177	0		0	[Q53GL0, Q5T4P8, Q5T4P9]	51177
			3.54676	0			2.Plasma Membrane	2.Plasma Membrane, 3.Intra Cellular, 5.Nucleus	0.281948	1	4	ENSG00000100503	GENE-nonsense_mediated_decay,processed_transcript,protein_coding,retained_intron	51199	NIN	NIN			false	51199	327	0	1	ASSOCIATED_NEW_GENE	0	0.992306	false	0	51199	0		0	[A0A0B4J215, A0A669KBB6, A0A669KBE5, A0A669KBI5, A0A669KBK6, A0A6F7YPF6, C9J066, E9PJH9, E9PN67, H7C162, H9KV85, Q5XUU0, Q8N4C6, R4GN85]	51199
			3.57406	0			1.Extracellular	1.Extracellular, 3.Intra Cellular	0.279794	1	4	ENSG00000128510	GENE-processed_transcript,protein_coding,retained_intron	51200	CPA4	CPA4			false	51200	307	0	1	ASSOCIATED_NEW_GENE	0	0.992223	false	0	51200	0		0	[A4D1M3, B7Z5J4, C9J3P4, C9J6N7, C9J7D6, Q9UI42]	51200
			3.99317	0			2.Plasma Membrane	2.Plasma Membrane, 3.Intra Cellular	0.250427	1	6	ENSG00000104219	GENE-protein_coding,retained_intron	51201	ZDHHC2	ZDHHC2			false	51201	109	0	1	ASSOCIATED_NEW_GENE	0	0.990957	false	0	51201	0		0	[A0A140VKD9, A0A1Y8EM58, E5RFZ7, Q9UIJ5]	51201
			3.58362	0			5.Nucleus	5.Nucleus	0.279048	1	4	ENSG00000213782	GENE-processed_transcript,protein_coding,retained_intron	51202	DDX47	DDX47			false	51202	300	0	1	ASSOCIATED_NEW_GENE	0	0.992195	false	0	51202	0		0	[A0A024RAS3, F5H1N9, Q9H0S4]	51202
			4.07235	0			1.Extracellular	1.Extracellular, 2.Plasma Membrane	0.245558	1	6	ENSG00000150938	GENE-processed_transcript,protein_coding,retained_intron	51232	CRIM1	CRIM1			false	51232	46	0	1	ASSOCIATED_NEW_GENE	0	0.990718	false	0	51232	0		0	[A0A0G2JN95, A0A0G2JN98, H7C1Z0, H7C2T6, H7C458, Q4ZG85, Q53TH9, Q53TR0, Q9NZV1]	51232
			3.54676	0			3.Intra Cellular	3.Intra Cellular	0.281948	1	4	ENSG00000145979	GENE-nonsense_mediated_decay,processed_transcript,protein_coding	51256	TBC1D7	TBC1D7			false	51256	327	0	1	ASSOCIATED_NEW_GENE	0	0.992306	false	0	51256	0		0	[A0A024QZX0, A0A024R011, B4DK47, Q5JPB9, Q5SZL3, Q5SZL4, Q5SZL5, Q5SZL6, Q5SZL8, Q5SZM1, Q5SZM2, Q9P0N9, U3KPS8, U3KPY5, U3KQ23, U3KQD8, U3KQQ0]	51256
			3.57406	0			3.Intra Cellular	3.Intra Cellular	0.279794	1	4	ENSG00000111639	GENE-protein_coding	51258	MRPL51	MRPL51			false	51258	307	0	1	ASSOCIATED_NEW_GENE	0	0.992223	false	0	51258	0		0	[A0A087WU28, A0A0B4J2C1, M0R176, Q4U2R6]	51258
			3.57406	0			1.Extracellular	1.Extracellular	0.279794	1	4	ENSG00000139178	GENE-non_stop_decay,nonsense_mediated_decay,processed_transcript,protein_coding,retained_intron	51279	C1RL	C1RL			false	51279	307	0	1	ASSOCIATED_NEW_GENE	0	0.992223	false	0	51279	0		0	[F5GWF3, F5H2Z5, F5H6S5, F5H7C8, H0YF87, H0YFJ9, H0YFL7, H0YGP8, Q6P672, Q9NZP8]	51279
			3.54676	0			3.Intra Cellular	3.Intra Cellular	0.281948	1	4	ENSG00000147454	GENE-nonsense_mediated_decay,processed_transcript,protein_coding,retained_intron	51312	SLC25A37	SLC25A37			false	51312	327	0	1	ASSOCIATED_NEW_GENE	0	0.992306	false	0	51312	0		0	[F8W9Q7, H0YAT5, Q71JB2, Q9NYZ2]	51312
			3.57406	0			1.Extracellular	1.Extracellular	0.279794	1	4	ENSG00000130193	GENE-nonsense_mediated_decay,protein_coding,retained_intron	51337	THEM6	THEM6			false	51337	307	0	1	ASSOCIATED_NEW_GENE	0	0.992223	false	0	51337	0		0	[H0YAR9, Q8WUY1]	51337
			3.58362	0			0.Annotation definition not found in 'Homo Sapiens.properties' file	0.Annotation definition not found in 'Homo Sapiens.properties' file	0.279048	1	4	ENSG00000152926	GENE-protein_coding,retained_intron	51351	ZNF117	ZNF117			false	51351	300	0	1	ASSOCIATED_NEW_GENE	0	0.992195	false	0	51351	0		0	[A0A087X2A5, Q03924]	51351
			4.06689	0			3.Intra Cellular	3.Intra Cellular	0.245888	1	6	ENSG00000115252	GENE-nonsense_mediated_decay,protein_coding	5136	PDE1A	PDE1A			false	5136	108	0	1	ASSOCIATED_NEW_GENE	0	0.990734	false	0	5136	0		0	[B7Z226, B7Z7A2, P54750, Q53T15, Q53TB0, Q9UNL9, Q9Y246, Q9Y633, Q9Y634]	5136
			4.06689	0			1.Extracellular	1.Extracellular	0.245888	1	6	ENSG00000101280	GENE-protein_coding	51378	ANGPT4	ANGPT4			false	51378	108	0	1	ASSOCIATED_NEW_GENE	0	0.990734	false	0	51378	0		0	[Q9Y264]	51378
			3.54676	0			1.Extracellular	1.Extracellular, 3.Intra Cellular	0.281948	1	4	ENSG00000002745	GENE-protein_coding	51384	WNT16	WNT16			false	51384	327	0	1	ASSOCIATED_NEW_GENE	0	0.992306	false	0	51384	0		0	[A4D0W7, A4D0W8, A8W4W5, E9PH60, L8ECG6, Q9UBV4]	51384
			3.57406	0			3.Intra Cellular	3.Intra Cellular	0.279794	1	4	ENSG00000111832	GENE-processed_transcript,protein_coding	51389	RWDD1	RWDD1			false	51389	307	0	1	ASSOCIATED_NEW_GENE	0	0.992223	false	0	51389	0		0	[E5RGQ3, E5RGS5, E5RJE3, Q9H446]	51389
			3.54676	0			0.Annotation definition not found in 'Homo Sapiens.properties' file	0.Annotation definition not found in 'Homo Sapiens.properties' file	0.281948	1	4	ENSG00000196247	GENE-nonsense_mediated_decay,processed_transcript,protein_coding	51427	ZNF107	ZNF107			false	51427	327	0	1	ASSOCIATED_NEW_GENE	0	0.992306	false	0	51427	0		0	[A0A024R5Y9, A0A087WYK5, A0A0B4J2G0, A0A8C8KK49, C9JSF9, Q8WVL4, Q9UII5]	51427
			4.07099	0			3.Intra Cellular	3.Intra Cellular	0.245641	1	6	ENSG00000137414	GENE-nonsense_mediated_decay,protein_coding,retained_intron	51439	FAM8A1	FAM8A1			false	51439	48	0	1	ASSOCIATED_NEW_GENE	0	0.990722	false	0	51439	0		0	[A0A024R006, Q9UBU6]	51439
			3.99317	0			1.Extracellular	1.Extracellular, 2.Plasma Membrane, 3.Intra Cellular	0.250427	1	6	ENSG00000140519	GENE-nonsense_mediated_decay,protein_coding,retained_intron	51458	RHCG	RHCG			false	51458	109	0	1	ASSOCIATED_NEW_GENE	0	0.990957	false	0	51458	0		0	[A0A3B3IT41, H0YKQ3, H0YM79, H0YMF8, H0YMS1, Q9UBD6]	51458
			4.16655	0			3.Intra Cellular	3.Intra Cellular	0.240007	1	6	ENSG00000198917	GENE-protein_coding,retained_intron	51490	SPOUT1	SPOUT1			false	51490	58	0	1	ASSOCIATED_NEW_GENE	0	0.990433	false	0	51490	0		0	[Q5T280, R4GNG4]	51490
			3.54676	0			3.Intra Cellular	3.Intra Cellular, 4.Nuclear Membrane	0.281948	1	4	ENSG00000074696	GENE-TEC,processed_transcript,protein_coding,retained_intron	51495	HACD3	HACD3			false	51495	327	0	1	ASSOCIATED_NEW_GENE	0	0.992306	false	0	51495	0		0	[H3BMZ1, H3BPZ1, H3BRL8, H3BS72, Q9P035]	51495
			3.57406	0			3.Intra Cellular	3.Intra Cellular	0.279794	1	4	ENSG00000213672	GENE-nonsense_mediated_decay,protein_coding,retained_intron	51517	NCKIPSD	NCKIPSD			false	51517	307	0	1	ASSOCIATED_NEW_GENE	0	0.992223	false	0	51517	0		0	[C9JC20, C9JMQ4, C9JSC3, F8WCR8, H7C0T9, H7C2K2, Q9NZQ3]	51517
			3.54676	0			3.Intra Cellular	3.Intra Cellular	0.281948	1	4	ENSG00000100744	GENE-protein_coding,retained_intron	51527	GSKIP	GSKIP			false	51527	327	0	1	ASSOCIATED_NEW_GENE	0	0.992306	false	0	51527	0		0	[A0A024R6P6, G3V368, G3V4I5, Q9P0R6]	51527
			3.57406	0			0.Annotation definition not found in 'Homo Sapiens.properties' file	0.Annotation definition not found in 'Homo Sapiens.properties' file	0.279794	1	4	ENSG00000136932	GENE-processed_transcript,protein_coding	51531	TRMO	TRMO			false	51531	307	0	1	ASSOCIATED_NEW_GENE	0	0.992223	false	0	51531	0		0	[Q5T111, Q5T112, Q5T114, Q6Y2L2, Q9BU70]	51531
			3.57406	0			1.Extracellular	1.Extracellular, 3.Intra Cellular	0.279794	1	4	ENSG00000197461	GENE-processed_transcript,protein_coding,retained_intron	5154	PDGFA	PDGFA			false	5154	307	0	1	ASSOCIATED_NEW_GENE	0	0.992223	false	0	5154	0		0	[A0A024R7Z9, A0A0A0MSC4, H7BYW6, P04085, Q32M96, Q9UGN0]	5154
			3.5413	0			3.Intra Cellular	3.Intra Cellular, 5.Nucleus	0.282382	1	4	ENSG00000187531	GENE-nonsense_mediated_decay,protein_coding,retained_intron	51547	SIRT7	SIRT7			false	51547	331	0	1	ASSOCIATED_NEW_GENE	0	0.992322	false	0	51547	0		0	[I3L2A4, I3L480, Q9NRC8]	51547
			4.36724	0			3.Intra Cellular	3.Intra Cellular	0.228978	1	6	ENSG00000120686	GENE-protein_coding,retained_intron	51569	UFM1	UFM1			false	51569	31	0	1	ASSOCIATED_NEW_GENE	0	0.989827	false	0	51569	0		0	[H0Y614, P61960]	51569
			3.5413	0			2.Plasma Membrane	2.Plasma Membrane, 3.Intra Cellular	0.282382	1	4	ENSG00000113721	GENE-nonsense_mediated_decay,processed_transcript,protein_coding,retained_intron	5159	PDGFRB	PDGFRB			false	5159	331	0	1	ASSOCIATED_NEW_GENE	0	0.992322	false	0	5159	0		0	[E5RH16, E5RII0, E5RJ14, P09619, Q59F04]	5159
			3.58362	0			3.Intra Cellular	3.Intra Cellular	0.279048	1	4	ENSG00000138036	GENE-nonsense_mediated_decay,processed_transcript,protein_coding,retained_intron	51626	DYNC2LI1	DYNC2LI1			false	51626	300	0	1	ASSOCIATED_NEW_GENE	0	0.992195	false	0	51626	0		0	[E5RFM8, E5RJK4, E5RK97, H7BYC8, Q8TCX1]	51626
			3.54676	0			3.Intra Cellular	3.Intra Cellular, 5.Nucleus	0.281948	1	4	ENSG00000067992	GENE-nonsense_mediated_decay,protein_coding,retained_intron	5165	PDK3	PDK3			false	5165	327	0	1	ASSOCIATED_NEW_GENE	0	0.992306	false	0	5165	0		0	[Q15120]	5165
			4.06689	0			1.Extracellular	1.Extracellular, 2.Plasma Membrane, 3.Intra Cellular	0.245888	1	6	ENSG00000115561	GENE-processed_transcript,protein_coding	51652	CHMP3	CHMP3			false	51652	108	0	1	ASSOCIATED_NEW_GENE	0	0.990734	false	0	51652	0		0	[Q9Y3E7]	51652
			3.54676	0			3.Intra Cellular	3.Intra Cellular	0.281948	1	4	ENSG00000079150	GENE-nonsense_mediated_decay,protein_coding,retained_intron	51661	FKBP7	FKBP7			false	51661	327	0	1	ASSOCIATED_NEW_GENE	0	0.992306	false	0	51661	0		0	[D3DPF8, F8WBF2, F8WCU2, H7BZJ4, Q9Y680]	51661
			3.54676	0			3.Intra Cellular	3.Intra Cellular	0.281948	1	4	ENSG00000065802	GENE-nonsense_mediated_decay,processed_transcript,protein_coding,retained_intron	51665	ASB1	ASB1			false	51665	327	0	1	ASSOCIATED_NEW_GENE	0	0.992306	false	0	51665	0		0	[B9A047, F8WBM8, Q9Y576]	51665
			4.16655	0			3.Intra Cellular	3.Intra Cellular	0.240007	1	6	ENSG00000005981	GENE-processed_transcript,protein_coding	51666	ASB4	ASB4			false	51666	58	0	1	ASSOCIATED_NEW_GENE	0	0.990433	false	0	51666	0		0	[Q9Y574]	51666
			3.58362	0			1.Extracellular	1.Extracellular, 2.Plasma Membrane	0.279048	1	4	ENSG00000105926	GENE-nonsense_mediated_decay,protein_coding,retained_intron	51678	PALS2	PALS2			false	51678	300	0	1	ASSOCIATED_NEW_GENE	0	0.992195	false	0	51678	0		0	[A0A024RA25, B8ZZG1, C9J4Q3, C9JGI8, F8WCD2, Q9NZW5, R4GNA8]	51678
			3.54676	0			0.Annotation definition not found in 'Homo Sapiens.properties' file	0.Annotation definition not found in 'Homo Sapiens.properties' file	0.281948	1	4	ENSG00000048649	GENE-processed_transcript,protein_coding,retained_intron	51773	RSF1	RSF1			false	51773	327	0	1	ASSOCIATED_NEW_GENE	0	0.992306	false	0	51773	0		0	[H0YCN2, H0YDG9, H0YER1, H0YEX0, H7C306, Q05DG0, Q96T23]	51773
			4.07235	0			3.Intra Cellular	3.Intra Cellular	0.245558	1	6	ENSG00000154518	GENE-protein_coding,retained_intron	518	ATP5MC3	ATP5MC3			false	518	46	0	1	ASSOCIATED_NEW_GENE	0	0.990718	false	0	518	0		0	[P48201]	518
			3.5413	0			1.Extracellular	1.Extracellular, 3.Intra Cellular	0.282382	1	4	ENSG00000109586	GENE-processed_transcript,protein_coding,retained_intron	51809	GALNT7	GALNT7			false	51809	331	0	1	ASSOCIATED_NEW_GENE	0	0.992322	false	0	51809	0		0	[E9PBY3, H0YAH3, H0YAK0, Q4W5F7, Q68VJ4, Q86SF2]	51809
			3.54676	0			2.Plasma Membrane	2.Plasma Membrane, 3.Intra Cellular	0.281948	1	4	ENSG00000081923	GENE-nonsense_mediated_decay,processed_transcript,protein_coding,retained_intron	5205	ATP8B1	ATP8B1			false	5205	327	0	1	ASSOCIATED_NEW_GENE	0	0.992306	false	0	5205	0		0	[A0A2R8Y5C5, A0A3B3IRQ1, K7EQC4, K7ESK2, O43520]	5205
			3.54676	0			3.Intra Cellular	3.Intra Cellular	0.281948	1	4	ENSG00000123836	GENE-nonsense_mediated_decay,processed_transcript,protein_coding,retained_intron	5208	PFKFB2	PFKFB2			false	5208	327	0	1	ASSOCIATED_NEW_GENE	0	0.992306	false	0	5208	0		0	[A0A087X278, A0A087X2H4, B0FLL2, F6RAZ1, F6XNB3, O60825]	5208
			3.54676	0			1.Extracellular	1.Extracellular, 3.Intra Cellular	0.281948	1	4	ENSG00000142657	GENE-nonsense_mediated_decay,processed_transcript,protein_coding,retained_intron	5226	PGD	PGD			false	5226	327	0	1	ASSOCIATED_NEW_GENE	0	0.992306	false	0	5226	0		0	[B4E2U0, K7EJT3, K7ELN9, K7EM49, K7EMN2, K7EPF6, P52209]	5226
			3.54676	0			3.Intra Cellular	3.Intra Cellular	0.281948	1	4	ENSG00000082175	GENE-nonsense_mediated_decay,protein_coding,retained_intron	5241	PGR	PGR			false	5241	327	0	1	ASSOCIATED_NEW_GENE	0	0.992306	false	0	5241	0		0	[A0A087WXR4, A0A0J9YVP1, A0A4P8D7F0, P06401, Q8NG42, Q8NG44, Q8NG45]	5241
			3.99317	0			3.Intra Cellular	3.Intra Cellular	0.250427	1	6	ENSG00000156873	GENE-nonsense_mediated_decay,protein_coding,retained_intron	5261	PHKG2	PHKG2			false	5261	109	0	1	ASSOCIATED_NEW_GENE	0	0.990957	false	0	5261	0		0	[A0A024QZE8, H3BN16, H3BP07, H3BTI9, H3BTW6, J3KNN3, P15735]	5261
			4.06689	0			1.Extracellular	1.Extracellular, 2.Plasma Membrane, 3.Intra Cellular	0.245888	1	6	ENSG00000162896	GENE-processed_transcript,protein_coding	5284	PIGR	PIGR			false	5284	108	0	1	ASSOCIATED_NEW_GENE	0	0.990734	false	0	5284	0		0	[P01833, Q8TE27]	5284
			3.58362	0			3.Intra Cellular	3.Intra Cellular	0.279048	1	4	ENSG00000143393	GENE-protein_coding,retained_intron	5298	PI4KB	PI4KB			false	5298	300	0	1	ASSOCIATED_NEW_GENE	0	0.992195	false	0	5298	0		0	[A0A0A0MSL0, A0A0B4J1S8, A6PVV8, E9PL47, F8W860, H0Y4F8, H0YCW3, Q9UBF8]	5298
			3.99317	0			1.Extracellular	1.Extracellular, 2.Plasma Membrane, 3.Intra Cellular	0.250427	1	6	ENSG00000008710	GENE-nonsense_mediated_decay,processed_transcript,protein_coding,retained_intron	5310	PKD1	PKD1			false	5310	109	0	1	ASSOCIATED_NEW_GENE	0	0.990957	false	0	5310	0		0	[A0A867GBE4, C1JFL5, C1JFL6, C1JFL7, H3BQF4, H3BSE8, H3BSE9, H3BTE0, H3BTG3, H3BV77, I3L4N0, O75276, P98161, Q15142]	5310
			3.57406	0			0.Annotation definition not found in 'Homo Sapiens.properties' file	0.Annotation definition not found in 'Homo Sapiens.properties' file	0.279794	1	4	ENSG00000126003	GENE-protein_coding	5326	PLAGL2	PLAGL2			false	5326	307	0	1	ASSOCIATED_NEW_GENE	0	0.992223	false	0	5326	0		0	[Q9UPG8]	5326
			3.58362	0			3.Intra Cellular	3.Intra Cellular	0.279048	1	4	ENSG00000186815	GENE-nonsense_mediated_decay,processed_transcript,protein_coding,retained_intron	53373	TPCN1	TPCN1			false	53373	300	0	1	ASSOCIATED_NEW_GENE	0	0.992195	false	0	53373	0		0	[A5PKY2, B3KSG7, B7Z3R2, F8VR74, F8VS97, F8VV93, F8VVY9, F8VZZ6, F8W0K7, F8W0P9, F8W1G4, F8W1L6, H0YHX1, H0YIK4, Q9ULQ1]	53373
			3.58362	0			1.Extracellular	1.Extracellular, 3.Intra Cellular	0.279048	1	4	ENSG00000083444	GENE-processed_transcript,protein_coding,retained_intron	5351	PLOD1	PLOD1			false	5351	300	0	1	ASSOCIATED_NEW_GENE	0	0.992195	false	0	5351	0		0	[Q02809, Q5JXB7, Q5JXB8]	5351
			3.99317	0			4.Nuclear Membrane	4.Nuclear Membrane, 5.Nucleus	0.250427	1	6	ENSG00000171566	GENE-nonsense_mediated_decay,protein_coding,retained_intron	5356	PLRG1	PLRG1			false	5356	109	0	1	ASSOCIATED_NEW_GENE	0	0.990957	false	0	5356	0		0	[B7Z982, D6RA26, D6RE04, H0YA24, H0YAA2, O43660]	5356
			4.07235	0			2.Plasma Membrane	2.Plasma Membrane, 3.Intra Cellular	0.245558	1	6	ENSG00000102024	GENE-nonsense_mediated_decay,protein_coding,retained_intron	5358	PLS3	PLS3			false	5358	46	0	1	ASSOCIATED_NEW_GENE	0	0.990718	false	0	5358	0		0	[A0A0A0MSQ0, A7E2S2, B4DPW9, F2Z2Z9, H7C4N2, P13797, U3KQI3]	5358
			3.54676	0			2.Plasma Membrane	2.Plasma Membrane	0.281948	1	4	ENSG00000137726	GENE-nonsense_mediated_decay,processed_transcript,protein_coding,retained_intron	53826	FXYD6	FXYD6			false	53826	327	0	1	ASSOCIATED_NEW_GENE	0	0.992306	false	0	53826	0		0	[A0A024R3J8, E9PHZ3, E9PJ02, J3QKN1, Q9H0Q3]	53826
			4.06689	0			2.Plasma Membrane	2.Plasma Membrane, 3.Intra Cellular	0.245888	1	6	ENSG00000171067	GENE-processed_transcript,protein_coding,retained_intron	53838	C11orf24	C11orf24			false	53838	108	0	1	ASSOCIATED_NEW_GENE	0	0.990734	false	0	53838	0		0	[A0A024R5K9, E9PI63, E9PRU5, Q96F05]	53838
			4.16655	0			2.Plasma Membrane	2.Plasma Membrane, 3.Intra Cellular	0.240007	1	6	ENSG00000169118	GENE-nonsense_mediated_decay,protein_coding,retained_intron	53944	CSNK1G1	CSNK1G1			false	53944	58	0	1	ASSOCIATED_NEW_GENE	0	0.990433	false	0	53944	0		0	[A0A024R5W3, A0A0U1RQG9, A0A0U1RQH9, A0A0U1RQK2, A0A0U1RQK6, A0A0U1RQN5, A0A0U1RQT7, A0A0U1RQU4, A0A0U1RQY7, A0A0U1RR14, A0A0U1RR31, A0A0U1RRH5, Q8IXA3, Q9HCP0, U3KQA5, U3KQB3]	53944
			3.58362	0			3.Intra Cellular	3.Intra Cellular, 5.Nucleus	0.279048	1	4	ENSG00000185658	GENE-nonsense_mediated_decay,processed_transcript,protein_coding,retained_intron	54014	BRWD1	BRWD1			false	54014	300	0	1	ASSOCIATED_NEW_GENE	0	0.992195	false	0	54014	0		0	[A5PLN2, H0Y463, H0Y4A7, H0Y4R9, H0Y500, H0Y5I9, H7BZR9, H7C409, L8E8H4, Q9NSI6]	54014
			3.58362	0			2.Plasma Membrane	2.Plasma Membrane	0.279048	1	4	ENSG00000100941	GENE-processed_transcript,protein_coding,retained_intron	5411	PNN	PNN			false	5411	300	0	1	ASSOCIATED_NEW_GENE	0	0.992195	false	0	5411	0		0	[G3V579, G3V5F0, Q9H307]	5411
			3.54676	0			1.Extracellular	1.Extracellular, 2.Plasma Membrane	0.281948	1	4	ENSG00000122042	GENE-protein_coding	5412	UBL3	UBL3			false	5412	327	0	1	ASSOCIATED_NEW_GENE	0	0.992306	false	0	5412	0		0	[A0A024RDP0, O95164]	5412
			3.58362	0			0.Annotation definition not found in 'Homo Sapiens.properties' file	0.Annotation definition not found in 'Homo Sapiens.properties' file	0.279048	1	4	ENSG00000241852	GENE-processed_transcript,protein_coding	541565	C8orf58	C8orf58			false	541565	300	0	1	ASSOCIATED_NEW_GENE	0	0.992195	false	0	541565	0		0	[A0A087WX44, A0A087WZ43, E5RJ64, H0YAZ5, Q7Z758, Q8NAV2]	541565
			3.58362	0			2.Plasma Membrane	2.Plasma Membrane, 3.Intra Cellular	0.279048	1	4	ENSG00000147481	GENE-nonsense_mediated_decay,processed_transcript,protein_coding	54212	SNTG1	SNTG1			false	54212	300	0	1	ASSOCIATED_NEW_GENE	0	0.992195	false	0	54212	0		0	[A0A024R7Y0, A0A2R8Y457, A0A2R8Y5G8, A0A2R8Y5T2, A0A2R8Y631, A0A2R8Y668, A0A2R8Y6P6, A0A2R8Y7J9, A0A2R8Y7L6, A0A2R8Y7Z5, A0A2R8YDV6, A0A2R8YEF7, A0A2R8YF28, A0A2R8YFF5, A0A2R8YGL5, B2RA84, E5RHN6, E5RIN0, H0YC21, Q9NSN8]	54212
			3.57406	0			1.Extracellular	1.Extracellular, 3.Intra Cellular	0.279794	1	4	ENSG00000144231	GENE-processed_transcript,protein_coding	5433	POLR2D	POLR2D			false	5433	307	0	1	ASSOCIATED_NEW_GENE	0	0.992223	false	0	5433	0		0	[E9PB93, E9PHV4, O15514, Q53T47, Q587J0]	5433
			3.54676	0			1.Extracellular	1.Extracellular, 2.Plasma Membrane, 3.Intra Cellular	0.281948	1	4	ENSG00000134294	GENE-nonsense_mediated_decay,processed_transcript,protein_coding,retained_intron	54407	SLC38A2	SLC38A2			false	54407	327	0	1	ASSOCIATED_NEW_GENE	0	0.992306	false	0	54407	0		0	[A0A024R0W3, F8VQW8, F8VUY8, Q8NHT5, Q96QD8]	54407
			3.57406	0			3.Intra Cellular	3.Intra Cellular	0.279794	1	4	ENSG00000205352	GENE-protein_coding,retained_intron	54458	PRR13	PRR13			false	54458	307	0	1	ASSOCIATED_NEW_GENE	0	0.992223	false	0	54458	0		0	[A0A024RB45, F8VP70, F8VRX0, F8VU40, F8VWB5, F8VZP4, F8W1R5, Q9NZ81]	54458
			3.54676	0			3.Intra Cellular	3.Intra Cellular	0.281948	1	4	ENSG00000086666	GENE-protein_coding,retained_intron	54469	ZFAND6	ZFAND6			false	54469	327	0	1	ASSOCIATED_NEW_GENE	0	0.992306	false	0	54469	0		0	[H0YK21, H0YK54, H0YLR2, H0YME2, H0YMG0, H0YMR5, H3BM82, H3BMJ5, H3BP46, H3BPX9, H3BT16, Q6FIF0]	54469
			3.57406	0			3.Intra Cellular	3.Intra Cellular	0.279794	1	4	ENSG00000285025	GENE-protein_coding	54471	MIEF1	MIEF1			false	54471	307	0	1	ASSOCIATED_NEW_GENE	0	0.992223	false	0	54471	0		0	[A0A024R1L3, B0QY94, B0QY95, L0R8F8, Q9H0J7, Q9NQG6]	54471
			4.07235	0			3.Intra Cellular	3.Intra Cellular	0.245558	1	6	ENSG00000125633	GENE-nonsense_mediated_decay,processed_transcript,protein_coding,retained_intron	54520	CCDC93	CCDC93			false	54520	46	0	1	ASSOCIATED_NEW_GENE	0	0.990718	false	0	54520	0		0	[F8W9X7, H7C050, Q567U6]	54520
			3.54676	0			3.Intra Cellular	3.Intra Cellular	0.281948	1	4	ENSG00000168209	GENE-nonsense_mediated_decay,protein_coding,retained_intron	54541	DDIT4	DDIT4			false	54541	327	0	1	ASSOCIATED_NEW_GENE	0	0.992306	false	0	54541	0		0	[A0A024QZQ6, A0A7P0Z4M7, Q9NX09]	54541
			3.54676	0			3.Intra Cellular	3.Intra Cellular	0.281948	1	4	ENSG00000150712	GENE-nonsense_mediated_decay,processed_transcript,protein_coding,retained_intron	54545	MTMR12	MTMR12			false	54545	327	0	1	ASSOCIATED_NEW_GENE	0	0.992306	false	0	54545	0		0	[D6RE76, D6RHK0, Q9C0I1]	54545
			3.5413	0			3.Intra Cellular	3.Intra Cellular	0.282382	1	4	ENSG00000204531	GENE-processed_transcript,protein_coding,retained_intron	5460	POU5F1	POU5F1			false	5460	331	0	1	ASSOCIATED_NEW_GENE	0	0.992322	false	0	5460	0		0	[A0A0K0KMI2, A0A0K0KMS3, A0A0K0KMW9, A0A1W2PP83, A7WPL9, A7WPM0, A7WPM1, A7WPM2, A7WPM3, A7WPM4, A7WPM5, A7WPM6, A7WPM7, A7WPM8, A7WPM9, A7WPN0, B5B8N7, B5B8N8, B5B8N9, B5B8P0, B5B8P1, B5B8P2, B5B8P3, B5B8P4, B5B8P5, B5B8P6, B5B8P7, B5B8P8, B5B8P9, B5B8Q0, B5B8Q1, B5B8Q2, B5B8Q3, B5B8Q4, C3RUE0, D2IYK3, D5K9Q3, D5K9Q6, D5K9Q7, D5K9Q9, D5K9R1, D5K9R2, D5K9R3, D5K9R4, D5K9R5, D5K9R7, D5K9R8, D5K9R9…	5460
			4.36724	0			0.Annotation definition not found in 'Homo Sapiens.properties' file	0.Annotation definition not found in 'Homo Sapiens.properties' file	0.228978	1	6	ENSG00000186951	GENE-processed_transcript,protein_coding,retained_intron	5465	PPARA	PPARA			false	5465	31	0	1	ASSOCIATED_NEW_GENE	0	0.989827	false	0	5465	0		0	[B0QYX1, B0QYX2, F1D8S4, L8E859, Q07869, Q86SF0]	5465
			3.54676	0			3.Intra Cellular	3.Intra Cellular	0.281948	1	4	ENSG00000107021	GENE-processed_transcript,protein_coding	54662	TBC1D13	TBC1D13			false	54662	327	0	1	ASSOCIATED_NEW_GENE	0	0.992306	false	0	54662	0		0	[A0A024R8B1, A0A024R8C8, B3KNG3, B4DHM6, Q9NVG8]	54662
			3.54676	0			1.Extracellular	1.Extracellular	0.281948	1	4	ENSG00000173114	GENE-processed_transcript,protein_coding	54674	LRRN3	LRRN3			false	54674	327	0	1	ASSOCIATED_NEW_GENE	0	0.992306	false	0	54674	0		0	[A4D0T1, E7EW58, Q9H3W5, Q9NUU4]	54674
			3.58362	0			3.Intra Cellular	3.Intra Cellular	0.279048	1	4	ENSG00000088766	GENE-processed_transcript,protein_coding,retained_intron	54675	CRLS1	CRLS1			false	54675	300	0	1	ASSOCIATED_NEW_GENE	0	0.992195	false	0	54675	0		0	[Q6NTG3, Q9UJA2]	54675
			3.58362	0			3.Intra Cellular	3.Intra Cellular	0.279048	1	4	ENSG00000157450	GENE-processed_transcript,protein_coding,retained_intron	54778	RNF111	RNF111			false	54778	300	0	1	ASSOCIATED_NEW_GENE	0	0.992195	false	0	54778	0		0	[A0A024R5T5, A0A024R5V6, H0YKK5, H0YKS2, H0YLK9, L0R5C6, Q6ZNA4]	54778
			3.58362	0			1.Extracellular	1.Extracellular, 3.Intra Cellular	0.279048	1	4	ENSG00000168938	GENE-protein_coding,retained_intron	5480	PPIC	PPIC			false	5480	300	0	1	ASSOCIATED_NEW_GENE	0	0.992195	false	0	5480	0		0	[P45877]	5480
			3.54676	0			3.Intra Cellular	3.Intra Cellular	0.281948	1	4	ENSG00000114796	GENE-processed_transcript,protein_coding,retained_intron	54800	KLHL24	KLHL24			false	54800	327	0	1	ASSOCIATED_NEW_GENE	0	0.992306	false	0	54800	0		0	[C9J0A6, C9J2N4, C9J3M5, C9JCK3, C9JMQ9, C9JN72, C9JQ67, C9JXR5, Q6TFL4]	54800
			3.54676	0			0.Annotation definition not found in 'Homo Sapiens.properties' file	0.Annotation definition not found in 'Homo Sapiens.properties' file	0.281948	1	4	ENSG00000171466	GENE-nonsense_mediated_decay,protein_coding	54811	ZNF562	ZNF562			false	54811	327	0	1	ASSOCIATED_NEW_GENE	0	0.992306	false	0	54811	0		0	[A0A024R7A3, A0A0G2JLJ0, B4DMG0, B4DZP9, B4E2P7, K7EIE6, K7ELE4, K7EN01, K7ENE4, K7EQZ2, Q6V9R5]	54811
			3.54676	0			3.Intra Cellular	3.Intra Cellular	0.281948	1	4	ENSG00000119844	GENE-nonsense_mediated_decay,protein_coding,retained_intron	54812	AFTPH	AFTPH			false	54812	327	0	1	ASSOCIATED_NEW_GENE	0	0.992306	false	0	54812	0		0	[A0A0A0MSN6, A0A0U1RR74, B8ZZI9, Q53GW0, Q6ULP2]	54812
			4.07235	0			2.Plasma Membrane	2.Plasma Membrane	0.245558	1	6	ENSG00000092439	GENE-processed_transcript,protein_coding,retained_intron	54822	TRPM7	TRPM7			false	54822	46	0	1	ASSOCIATED_NEW_GENE	0	0.990718	false	0	54822	0		0	[A0A024R5V1, A0A0C4DGL2, H0YLN8, H0YNM0, Q96QT4]	54822
			3.58362	0			3.Intra Cellular	3.Intra Cellular	0.279048	1	4	ENSG00000141664	GENE-nonsense_mediated_decay,processed_transcript,protein_coding,retained_intron	54877	ZCCHC2	ZCCHC2			false	54877	300	0	1	ASSOCIATED_NEW_GENE	0	0.992195	false	0	54877	0		0	[A0A087WXC7, K7EKB8, K7ERQ9, K7ESN2, Q9BRD4, Q9C0B9]	54877
			3.54676	0			0.Annotation definition not found in 'Homo Sapiens.properties' file	0.Annotation definition not found in 'Homo Sapiens.properties' file	0.281948	1	4	ENSG00000114933	GENE-protein_coding	54891	INO80D	INO80D			false	54891	327	0	1	ASSOCIATED_NEW_GENE	0	0.992306	false	0	54891	0		0	[C9JLV2, C9JLZ4, L8E8T9, Q53TQ3]	54891
			3.57406	0			3.Intra Cellular	3.Intra Cellular	0.279794	1	4	ENSG00000145996	GENE-processed_transcript,protein_coding	54901	CDKAL1	CDKAL1			false	54901	307	0	1	ASSOCIATED_NEW_GENE	0	0.992223	false	0	54901	0		0	[Q5VV42]	54901
			3.57406	0			1.Extracellular	1.Extracellular, 2.Plasma Membrane, 3.Intra Cellular	0.279794	1	4	ENSG00000168758	GENE-protein_coding,retained_intron	54910	SEMA4C	SEMA4C			false	54910	307	0	1	ASSOCIATED_NEW_GENE	0	0.992223	false	0	54910	0		0	[C9J4M7, C9JV89, Q53RE7, Q6P5A5, Q9C0C4]	54910
			3.99317	0			1.Extracellular	1.Extracellular, 2.Plasma Membrane, 3.Intra Cellular	0.250427	1	6	ENSG00000118898	GENE-protein_coding,retained_intron	5493	PPL	PPL			false	5493	109	0	1	ASSOCIATED_NEW_GENE	0	0.990957	false	0	5493	0		0	[K7EKI8, K7EQ71, O60437]	5493
			3.58362	0			2.Plasma Membrane	2.Plasma Membrane, 3.Intra Cellular	0.279048	1	4	ENSG00000100614	GENE-nonsense_mediated_decay,protein_coding	5494	PPM1A	PPM1A			false	5494	300	0	1	ASSOCIATED_NEW_GENE	0	0.992195	false	0	5494	0		0	[A0A024R6A5, B2R8E4, B5BUD5, E9PJN3, E9PKB5, E9PL75, E9PNE1, E9PP44, L8EAT3, P35813]	5494
			3.57406	0			3.Intra Cellular	3.Intra Cellular	0.279794	1	4	ENSG00000177692	GENE-protein_coding	54943	DNAJC28	DNAJC28			false	54943	307	0	1	ASSOCIATED_NEW_GENE	0	0.992223	false	0	54943	0		0	[Q9NX36]	54943
			4.06689	0			0.Annotation definition not found in 'Homo Sapiens.properties' file	0.Annotation definition not found in 'Homo Sapiens.properties' file	0.245888	1	6	ENSG00000184083	GENE-processed_transcript,protein_coding	54954	FAM120C	FAM120C			false	54954	108	0	1	ASSOCIATED_NEW_GENE	0	0.990734	false	0	54954	0		0	[F8W881, Q642I8, Q9NX05]	54954
			3.54676	0			3.Intra Cellular	3.Intra Cellular, 5.Nucleus	0.281948	1	4	ENSG00000116922	GENE-nonsense_mediated_decay,processed_transcript,protein_coding	54955	C1orf109	C1orf109			false	54955	327	0	1	ASSOCIATED_NEW_GENE	0	0.992306	false	0	54955	0		0	[A0A087WUX7, B4DRQ5, B7Z9X8, Q9NX04, V9GY35, V9GYI2, V9GYN4, V9GYQ8, V9GYT8]	54955
			3.57406	0			3.Intra Cellular	3.Intra Cellular	0.279794	1	4	ENSG00000138617	GENE-nonsense_mediated_decay,processed_transcript,protein_coding	54956	PARP16	PARP16			false	54956	307	0	1	ASSOCIATED_NEW_GENE	0	0.992223	false	0	54956	0		0	[H3BV75, Q8N5Y8]	54956
			3.58362	0			1.Extracellular	1.Extracellular, 3.Intra Cellular	0.279048	1	4	ENSG00000127054	GENE-nonsense_mediated_decay,processed_transcript,protein_coding,retained_intron	54973	INTS11	INTS11			false	54973	300	0	1	ASSOCIATED_NEW_GENE	0	0.992195	false	0	54973	0		0	[A0A024R073, A0A087WXT8, A0A087WYI0, C9IYS7, C9J979, E9PI75, E9PIG1, E9PIL7, E9PIS0, E9PIX9, E9PJG0, E9PKA4, E9PMA2, E9PNH9, E9PNS4, E9PQF0, H0YCE0, H0YDB1, H0YE15, H0YEQ9, H7C247, J3QRY6, Q5TA45, Q96HV7]	54973
			3.54676	0			0.Annotation definition not found in 'Homo Sapiens.properties' file	0.Annotation definition not found in 'Homo Sapiens.properties' file	0.281948	1	4	ENSG00000178974	GENE-nonsense_mediated_decay,processed_transcript,protein_coding	55030	FBXO34	FBXO34			false	55030	327	0	1	ASSOCIATED_NEW_GENE	0	0.992306	false	0	55030	0		0	[A0A024R653, G3V2U9, Q9NWN3]	55030
			3.54676	0			3.Intra Cellular	3.Intra Cellular	0.281948	1	4	ENSG00000106080	GENE-nonsense_mediated_decay,protein_coding,retained_intron	55033	FKBP14	FKBP14			false	55033	327	0	1	ASSOCIATED_NEW_GENE	0	0.992306	false	0	55033	0		0	[A0A090N7V8, F8WBZ0, H7C1Z9, Q9NWM8]	55033
			3.54676	0			0.Annotation definition not found in 'Homo Sapiens.properties' file	0.Annotation definition not found in 'Homo Sapiens.properties' file	0.281948	1	4	ENSG00000181458	GENE-processed_transcript,protein_coding,retained_intron	55076	TMEM45A	TMEM45A			false	55076	327	0	1	ASSOCIATED_NEW_GENE	0	0.992306	false	0	55076	0		0	[C9J9Z5, J3KQ06, Q9NWC5]	55076
			3.54676	0			3.Intra Cellular	3.Intra Cellular	0.281948	1	4	ENSG00000066739	GENE-processed_transcript,protein_coding,retained_intron	55102	ATG2B	ATG2B			false	55102	327	0	1	ASSOCIATED_NEW_GENE	0	0.992306	false	0	55102	0		0	[L8E8U7, Q96BY7]	55102
			3.58362	0			3.Intra Cellular	3.Intra Cellular	0.279048	1	4	ENSG00000160058	GENE-nonsense_mediated_decay,processed_transcript,protein_coding,retained_intron	55108	BSDC1	BSDC1			false	55108	300	0	1	ASSOCIATED_NEW_GENE	0	0.992195	false	0	55108	0		0	[E9PNA9, E9PQA7, E9PS77, F8W6C6, Q9NW68]	55108
			3.58362	0			2.Plasma Membrane	2.Plasma Membrane	0.279048	1	4	ENSG00000072041	GENE-nonsense_mediated_decay,processed_transcript,protein_coding,retained_intron	55117	SLC6A15	SLC6A15			false	55117	300	0	1	ASSOCIATED_NEW_GENE	0	0.992195	false	0	55117	0		0	[A0A7P0T826, A0A7P0T8B7, A0A7P0T8I1, A0A7P0T9G8, A0A7P0T9P8, A0A7P0T9Z9, A0A7P0TA72, A0A7P0TAT1, A0A7P0TAZ8, A0A7P0TB05, A0A7P0TB74, A0A7P0TBL2, A0A7P0Z4F0, A0A7P0Z4M4, F8VSG1, F8WJN6, Q8IXG2, Q8TBM6, Q9H2J7, Q9NW50]	55117
			3.58362	0			1.Extracellular	1.Extracellular, 3.Intra Cellular, 5.Nucleus	0.279048	1	4	ENSG00000134690	GENE-protein_coding	55143	CDCA8	CDCA8			false	55143	300	0	1	ASSOCIATED_NEW_GENE	0	0.992195	false	0	55143	0		0	[Q53HL2]	55143
			3.54676	0			2.Plasma Membrane	2.Plasma Membrane, 3.Intra Cellular	0.281948	1	4	ENSG00000171492	GENE-protein_coding	55144	LRRC8D	LRRC8D			false	55144	327	0	1	ASSOCIATED_NEW_GENE	0	0.992306	false	0	55144	0		0	[B3KRU1, E9PJ89, E9PJS7, E9PL08, E9PMF9, Q5VWA0, Q7L1W4, Q96GG5]	55144
			3.99317	0			3.Intra Cellular	3.Intra Cellular	0.250427	1	6	ENSG00000178502	GENE-protein_coding	55175	KLHL11	KLHL11			false	55175	109	0	1	ASSOCIATED_NEW_GENE	0	0.990957	false	0	55175	0		0	[A0A024R1T8, Q9NVR0]	55175
			3.54676	0			0.Annotation definition not found in 'Homo Sapiens.properties' file	0.Annotation definition not found in 'Homo Sapiens.properties' file	0.281948	1	4	ENSG00000163939	GENE-nonsense_mediated_decay,protein_coding,retained_intron	55193	PBRM1	PBRM1			false	55193	327	0	1	ASSOCIATED_NEW_GENE	0	0.992306	false	0	55193	0		0	[C9J053, C9J409, C9J9L6, C9JCJ2, C9JPI5, C9JQF1, E7EVG2, H0Y5B5, Q86U86]	55193
			3.54676	0			0.Annotation definition not found in 'Homo Sapiens.properties' file	0.Annotation definition not found in 'Homo Sapiens.properties' file	0.281948	1	4	ENSG00000174718	GENE-processed_transcript,protein_coding,retained_intron	55196	RESF1	RESF1			false	55196	327	0	1	ASSOCIATED_NEW_GENE	0	0.992306	false	0	55196	0		0	[F5H488, J3KPI3, Q9HCM1]	55196
			3.57406	0			3.Intra Cellular	3.Intra Cellular	0.279794	1	4	ENSG00000221914	GENE-nonsense_mediated_decay,processed_transcript,protein_coding,retained_intron	5520	PPP2R2A	PPP2R2A			false	5520	307	0	1	ASSOCIATED_NEW_GENE	0	0.992223	false	0	5520	0		0	[A0A140VJT0, A0A590UJJ1, A0A590UJY3, E5RFR9, E5RHQ2, E5RIY1, E5RJV1, E5RJV2, P63151]	5520
			3.57406	0			1.Extracellular	1.Extracellular, 3.Intra Cellular	0.279794	1	4	ENSG00000134108	GENE-nonsense_mediated_decay,protein_coding,retained_intron	55207	ARL8B	ARL8B			false	55207	307	0	1	ASSOCIATED_NEW_GENE	0	0.992223	false	0	55207	0		0	[A0A6Q8PGM9, F2Z344, F8WAW5, Q9NVJ2]	55207
			3.57406	0			0.Annotation definition not found in 'Homo Sapiens.properties' file	0.Annotation definition not found in 'Homo Sapiens.properties' file	0.279794	1	4	ENSG00000150776	GENE-nonsense_mediated_decay,protein_coding,retained_intron	55216	NKAPD1	NKAPD1			false	55216	307	0	1	ASSOCIATED_NEW_GENE	0	0.992223	false	0	55216	0		0	[A0A024R3H5, E9PKA8, E9PPH9, E9PQL5, E9PSC8, Q6ZUT1]	55216
			3.57406	0			0.Annotation definition not found in 'Homo Sapiens.properties' file	0.Annotation definition not found in 'Homo Sapiens.properties' file	0.279794	1	4	ENSG00000172731	GENE-protein_coding	55222	LRRC20	LRRC20			false	55222	307	0	1	ASSOCIATED_NEW_GENE	0	0.992223	false	0	55222	0		0	[A0A024QZL5, A0A024QZM2, A0A024QZR0, A0A0A0MS58, Q8TCA0, X6RK58]	55222
			4.07099	0			3.Intra Cellular	3.Intra Cellular	0.245641	1	6	ENSG00000162437	GENE-nonsense_mediated_decay,protein_coding	55225	RAVER2	RAVER2			false	55225	48	0	1	ASSOCIATED_NEW_GENE	0	0.990722	false	0	55225	0		0	[E9PE10, Q9HCJ3]	55225
			3.99317	0			3.Intra Cellular	3.Intra Cellular	0.250427	1	6	ENSG00000137269	GENE-nonsense_mediated_decay,protein_coding,retained_intron	55227	LRRC1	LRRC1			false	55227	109	0	1	ASSOCIATED_NEW_GENE	0	0.990957	false	0	55227	0		0	[Q5T0G3, Q9BTT6]	55227
			3.54676	0			1.Extracellular	1.Extracellular, 3.Intra Cellular, 5.Nucleus	0.281948	1	4	ENSG00000114978	GENE-processed_transcript,protein_coding,retained_intron	55233	MOB1A	MOB1A			false	55233	327	0	1	ASSOCIATED_NEW_GENE	0	0.992306	false	0	55233	0		0	[Q9H8S9]	55233
			3.57406	0			0.Annotation definition not found in 'Homo Sapiens.properties' file	0.Annotation definition not found in 'Homo Sapiens.properties' file	0.279794	1	4	ENSG00000103042	GENE-nonsense_mediated_decay,processed_transcript,protein_coding,retained_intron	55238	SLC38A7	SLC38A7			false	55238	307	0	1	ASSOCIATED_NEW_GENE	0	0.992223	false	0	55238	0		0	[H3BMC5, H3BN87, H3BP25, H3BPK8, H3BPV9, H3BRZ0, H3BU46, H3BV81, Q9NVC3]	55238
			3.58362	0			3.Intra Cellular	3.Intra Cellular	0.279048	1	4	ENSG00000203880	GENE-nonsense_mediated_decay,processed_transcript,protein_coding,retained_intron	55251	PCMTD2	PCMTD2			false	55251	300	0	1	ASSOCIATED_NEW_GENE	0	0.992195	false	0	55251	0		0	[A0A0G2JM70, A0A0G2JR02, F8W9F3, I6L9C7, Q6PIM4, Q9NV79, V9GYG6, V9GYL1, V9GYZ4, V9GYZ7, V9GZ41]	55251
			3.58362	0			0.Annotation definition not found in 'Homo Sapiens.properties' file	0.Annotation definition not found in 'Homo Sapiens.properties' file	0.279048	1	4	ENSG00000130024	GENE-processed_transcript,protein_coding,retained_intron	55274	PHF10	PHF10			false	55274	300	0	1	ASSOCIATED_NEW_GENE	0	0.992195	false	0	55274	0		0	[Q8WUB8, S5FZ81]	55274
			3.54676	0			3.Intra Cellular	3.Intra Cellular	0.281948	1	4	ENSG00000154001	GENE-processed_transcript,protein_coding,retained_intron	5529	PPP2R5E	PPP2R5E			false	5529	327	0	1	ASSOCIATED_NEW_GENE	0	0.992306	false	0	5529	0		0	[B5BTZ7, Q16537, Q562F2, Q58EX4, Q86XZ2]	5529
			3.57406	0			0.Annotation definition not found in 'Homo Sapiens.properties' file	0.Annotation definition not found in 'Homo Sapiens.properties' file	0.279794	1	4	ENSG00000109680	GENE-processed_transcript,protein_coding,retained_intron	55296	TBC1D19	TBC1D19			false	55296	307	0	1	ASSOCIATED_NEW_GENE	0	0.992223	false	0	55296	0		0	[D6RA60, D6RA74, D6RD52, D6RDZ1, Q8N5T2]	55296
			3.54676	0			1.Extracellular	1.Extracellular, 2.Plasma Membrane, 3.Intra Cellular	0.281948	1	4	ENSG00000138814	GENE-nonsense_mediated_decay,processed_transcript,protein_coding	5530	PPP3CA	PPP3CA			false	5530	327	0	1	ASSOCIATED_NEW_GENE	0	0.992306	false	0	5530	0		0	[A0A0S2Z4B5, A0A0S2Z4C6, E7ETC2, E9PK68, E9PPC8, H0YAB4, Q08209]	5530
			3.54676	0			3.Intra Cellular	3.Intra Cellular	0.281948	1	4	ENSG00000172296	GENE-processed_transcript,protein_coding	55304	SPTLC3	SPTLC3			false	55304	327	0	1	ASSOCIATED_NEW_GENE	0	0.992306	false	0	55304	0		0	[B1AKS2, B1AKS3, H0Y733, Q9NUV7]	55304
			3.99317	0			3.Intra Cellular	3.Intra Cellular	0.250427	1	6	ENSG00000168872	GENE-nonsense_mediated_decay,processed_transcript,protein_coding,retained_intron	55308	DDX19A	DDX19A			false	55308	109	0	1	ASSOCIATED_NEW_GENE	0	0.990957	false	0	55308	0		0	[B4DS24, H3BP36, H3BP50, H3BSL8, H3BTB3, I3L0H8, I3L352, J3QRH0, Q68DY7, Q9NUU7]	55308
			3.99317	0			2.Plasma Membrane	2.Plasma Membrane, 3.Intra Cellular	0.250427	1	6	ENSG00000148943	GENE-protein_coding	55327	LIN7C	LIN7C			false	55327	109	0	1	ASSOCIATED_NEW_GENE	0	0.990957	false	0	55327	0		0	[G3V1D4, Q9NUP9]	55327
			3.54676	0			3.Intra Cellular	3.Intra Cellular	0.281948	1	4	ENSG00000136048	GENE-nonsense_mediated_decay,protein_coding,retained_intron	55332	DRAM1	DRAM1			false	55332	327	0	1	ASSOCIATED_NEW_GENE	0	0.992306	false	0	55332	0		0	[A0A024RBF9, A0A0B4J256, H0YHJ0, H0YHV0, Q8N682]	55332
			3.57406	0			2.Plasma Membrane	2.Plasma Membrane, 3.Intra Cellular	0.279794	1	4	ENSG00000213463	GENE-processed_transcript,protein_coding	55333	SYNJ2BP	SYNJ2BP			false	55333	307	0	1	ASSOCIATED_NEW_GENE	0	0.992223	false	0	55333	0		0	[A0A024R670, P57105]	55333
			3.54676	0			2.Plasma Membrane	2.Plasma Membrane, 3.Intra Cellular	0.281948	1	4	ENSG00000104341	GENE-protein_coding	55353	LAPTM4B	LAPTM4B			false	55353	327	0	1	ASSOCIATED_NEW_GENE	0	0.992306	false	0	55353	0		0	[H0YBN1, Q86SJ0, Q86VI4]	55353
			4.16655	0			2.Plasma Membrane	2.Plasma Membrane	0.240007	1	6	ENSG00000060140	GENE-protein_coding	55359	STYK1	STYK1			false	55359	58	0	1	ASSOCIATED_NEW_GENE	0	0.990433	false	0	55359	0		0	[F5GZF6, F5H2I9, F5H366, F5H4G3, H0YGL5, L8ECH9, Q6J9G0]	55359
			4.07235	0			2.Plasma Membrane	2.Plasma Membrane	0.245558	1	6	ENSG00000204174	GENE-protein_coding	5540	NPY4R	NPY4R			false	5540	46	0	1	ASSOCIATED_NEW_GENE	0	0.990718	false	0	5540	0		0	[P50391]	5540
			4.06689	0			0.Annotation definition not found in 'Homo Sapiens.properties' file	0.Annotation definition not found in 'Homo Sapiens.properties' file	0.245888	1	6			554045	554045	554045			false	554045	108	0	1	ASSOCIATED_NEW_GENE	0	0.990734	false	0	554045	0		0		554045
			3.58362	0			3.Intra Cellular	3.Intra Cellular	0.279048	1	4	ENSG00000139163	GENE-nonsense_mediated_decay,processed_transcript,protein_coding,retained_intron	55500	ETNK1	ETNK1			false	55500	300	0	1	ASSOCIATED_NEW_GENE	0	0.992195	false	0	55500	0		0	[A0A5F9ZI33, A0A5K1VW28, H0YFP7, H0YH69, Q86U68, Q9HBU6]	55500
			3.54676	0			1.Extracellular	1.Extracellular, 3.Intra Cellular	0.281948	1	4	ENSG00000122862	GENE-processed_transcript,protein_coding	5552	SRGN	SRGN			false	5552	327	0	1	ASSOCIATED_NEW_GENE	0	0.992306	false	0	5552	0		0	[P10124]	5552
			3.57406	0			2.Plasma Membrane	2.Plasma Membrane, 3.Intra Cellular	0.279794	1	4	ENSG00000091527	GENE-nonsense_mediated_decay,protein_coding	55573	CDV3	CDV3			false	55573	307	0	1	ASSOCIATED_NEW_GENE	0	0.992223	false	0	55573	0		0	[D3DND1, D6R973, D6R9V8, D6RAV0, D6RDN0, D6RFH2, H0Y8K3, Q9UKY7]	55573
			3.57406	0			0.Annotation definition not found in 'Homo Sapiens.properties' file	0.Annotation definition not found in 'Homo Sapiens.properties' file	0.279794	1	4	ENSG00000146143	GENE-processed_transcript,protein_coding,retained_intron	5558	PRIM2	PRIM2			false	5558	307	0	1	ASSOCIATED_NEW_GENE	0	0.992223	false	0	5558	0		0	[A0A024RD43, A0A096LP51, A0A5F9ZHR0, A0A5F9ZHU7, H9XFA6, H9XFA7, I0CMJ8, I0CMK6, I0EZ64, P49643]	5558
			3.57406	0			1.Extracellular	1.Extracellular, 3.Intra Cellular	0.279794	1	4	ENSG00000165115	GENE-nonsense_mediated_decay,protein_coding	55582	KIF27	KIF27			false	55582	307	0	1	ASSOCIATED_NEW_GENE	0	0.992223	false	0	55582	0		0	[E0ZS58, F2Z355, Q86VH2]	55582
			3.54676	0			3.Intra Cellular	3.Intra Cellular	0.281948	1	4	ENSG00000158528	GENE-protein_coding	55607	PPP1R9A	PPP1R9A			false	55607	327	0	1	ASSOCIATED_NEW_GENE	0	0.992306	false	0	55607	0		0	[A4D1I0, B7ZLX4, C9J3G5, C9J730, Q9ULJ8]	55607
			3.99317	0			1.Extracellular	1.Extracellular, 3.Intra Cellular	0.250427	1	6	ENSG00000004766	GENE-nonsense_mediated_decay,processed_transcript,protein_coding,retained_intron	55610	VPS50	VPS50			false	55610	109	0	1	ASSOCIATED_NEW_GENE	0	0.990957	false	0	55610	0		0	[A0A3B3IRQ5, C9JA29, F2Z3F0, F8WDT1, H0Y7Q2, H7BZP1, Q96JG6]	55610
			4.07099	0			2.Plasma Membrane	2.Plasma Membrane, 3.Intra Cellular	0.245641	1	6	ENSG00000135956	GENE-protein_coding	55654	TMEM127	TMEM127			false	55654	48	0	1	ASSOCIATED_NEW_GENE	0	0.990722	false	0	55654	0		0	[C9J4H2, O75204, Q9H6I0]	55654
			3.58362	0			3.Intra Cellular	3.Intra Cellular	0.279048	1	4	ENSG00000166135	GENE-nonsense_mediated_decay,processed_transcript,protein_coding,retained_intron	55662	HIF1AN	HIF1AN			false	55662	300	0	1	ASSOCIATED_NEW_GENE	0	0.992195	false	0	55662	0		0	[E9PL41, E9PNR8, Q9NWT6]	55662
			3.58362	0			1.Extracellular	1.Extracellular, 2.Plasma Membrane, 3.Intra Cellular	0.279048	1	4	ENSG00000142875	GENE-processed_transcript,protein_coding	5567	PRKACB	PRKACB			false	5567	300	0	1	ASSOCIATED_NEW_GENE	0	0.992195	false	0	5567	0		0	[A0A087WVC4, A0A0A0MS54, B1APF7, B1APF8, B1APF9, B1APG0, B1APG1, B1APG2, B1APG3, B2RB89, B7ZA00, P22694]	5567
			3.57406	0			3.Intra Cellular	3.Intra Cellular	0.279794	1	4	ENSG00000152683	GENE-nonsense_mediated_decay,protein_coding	55676	SLC30A6	SLC30A6			false	55676	307	0	1	ASSOCIATED_NEW_GENE	0	0.992223	false	0	55676	0		0	[B3KU87, B5MCR8, C9JZR9, F8WCU3, F8WD78, F8WEL5, Q6NXT4]	55676
			3.99317	0			3.Intra Cellular	3.Intra Cellular	0.250427	1	6	ENSG00000204130	GENE-nonsense_mediated_decay,processed_transcript,protein_coding,retained_intron	55680	RUFY2	RUFY2			false	55680	109	0	1	ASSOCIATED_NEW_GENE	0	0.990957	false	0	55680	0		0	[H0YD93, L8EAY6, Q5GIA6, Q8WXA3, S4R3P2]	55680
			3.57406	0			3.Intra Cellular	3.Intra Cellular	0.279794	1	4	ENSG00000198700	GENE-processed_transcript,protein_coding	55705	IPO9	IPO9			false	55705	307	0	1	ASSOCIATED_NEW_GENE	0	0.992223	false	0	55705	0		0	[Q5SVH5, Q96P70]	55705
			3.58362	0	Transcription Factor Complex		3.Intra Cellular	3.Intra Cellular	0.279048	1	4	ENSG00000171681	GENE-processed_transcript,protein_coding,retained_intron	55729	ATF7IP	ATF7IP			false	55729	300	0	1	ASSOCIATED_NEW_GENE	0	0.992195	false	0	55729	0		0	[A0A024RAY1, A8MV73, B3KNI7, B3KQF8, F5GYR7, F5GZ10, F5GZ98, F5H1K9, F5H221, F5H2H9, F5H2W9, F5H3C4, F5H502, F5H592, F5H6X8, F5H8I0, F8WE35, H0YFA3, Q6VMQ6]	55729
			3.57406	0			3.Intra Cellular	3.Intra Cellular, 4.Nuclear Membrane	0.279794	1	4	ENSG00000086712	GENE-processed_transcript,protein_coding	55787	TXLNG	TXLNG			false	55787	307	0	1	ASSOCIATED_NEW_GENE	0	0.992223	false	0	55787	0		0	[Q9NUQ3]	55787
			3.5413	0			1.Extracellular	1.Extracellular, 2.Plasma Membrane	0.282382	1	4	ENSG00000167601	GENE-processed_transcript,protein_coding,retained_intron	558	AXL	AXL			false	558	331	0	1	ASSOCIATED_NEW_GENE	0	0.992322	false	0	558	0		0	[M0R0W6, P30530]	558
			3.54676	0			1.Extracellular	1.Extracellular, 2.Plasma Membrane, 3.Intra Cellular	0.281948	1	4	ENSG00000163932	GENE-nonsense_mediated_decay,protein_coding	5580	PRKCD	PRKCD			false	5580	327	0	1	ASSOCIATED_NEW_GENE	0	0.992306	false	0	5580	0		0	[A0A024R328, A0A494BZX2, A0A494C125, A0A494C1T7, B4DFV1, C9J9P1, C9JZU8, C9K0E3, Q05655]	5580
			3.57406	0			5.Nucleus	5.Nucleus	0.279794	1	4	ENSG00000108651	GENE-processed_transcript,protein_coding,retained_intron	55813	UTP6	UTP6			false	55813	307	0	1	ASSOCIATED_NEW_GENE	0	0.992223	false	0	55813	0		0	[J3KRR8, J3QSA7, Q9NYH9]	55813
			3.57406	0			3.Intra Cellular	3.Intra Cellular	0.279794	1	4	ENSG00000093144	GENE-nonsense_mediated_decay,processed_transcript,protein_coding,retained_intron	55862	ECHDC1	ECHDC1			false	55862	307	0	1	ASSOCIATED_NEW_GENE	0	0.992223	false	0	55862	0		0	[E9PIU8, E9PJS8, E9PLY6, E9PPG7, E9PRU6, F2Z2D6, H0Y525, H0Y5L2, H0YCS9, H0YD54, J3KP84, Q9NTX5]	55862
			3.58362	0			2.Plasma Membrane	2.Plasma Membrane, 3.Intra Cellular	0.279048	1	4	ENSG00000140553	GENE-nonsense_mediated_decay,processed_transcript,protein_coding,retained_intron	55898	UNC45A	UNC45A			false	55898	300	0	1	ASSOCIATED_NEW_GENE	0	0.992195	false	0	55898	0		0	[A0A1W2PNX8, A0A5F9ZI17, A0A5F9ZI32, Q9H3U1]	55898
			3.57406	0			3.Intra Cellular	3.Intra Cellular	0.279794	1	4	ENSG00000147439	GENE-nonsense_mediated_decay,processed_transcript,protein_coding,retained_intron	55909	BIN3	BIN3			false	55909	307	0	1	ASSOCIATED_NEW_GENE	0	0.992223	false	0	55909	0		0	[A0A1W2PS11, D3DSR7, E5RGB5, E5RHU4, E5RJI6, H7BYV6, Q9NQY0]	55909
			3.58362	0			1.Extracellular	1.Extracellular, 2.Plasma Membrane, 3.Intra Cellular, 4.Nuclear Membrane	0.279048	1	4	ENSG00000112851	GENE-processed_transcript,protein_coding,retained_intron	55914	ERBIN	ERBIN			false	55914	300	0	1	ASSOCIATED_NEW_GENE	0	0.992195	false	0	55914	0		0	[B4DIP2, H0Y9E8, H0YA04, Q96RT1]	55914
			3.57406	0			3.Intra Cellular	3.Intra Cellular	0.279794	1	4	ENSG00000069956	GENE-processed_transcript,protein_coding	5597	MAPK6	MAPK6			false	5597	307	0	1	ASSOCIATED_NEW_GENE	0	0.992223	false	0	5597	0		0	[Q16659]	5597
			3.57406	0			3.Intra Cellular	3.Intra Cellular	0.279794	1	4	ENSG00000076984	GENE-protein_coding,retained_intron	5609	MAP2K7	MAP2K7			false	5609	307	0	1	ASSOCIATED_NEW_GENE	0	0.992223	false	0	5609	0		0	[B4DV95, D6W660, O14733]	5609
			3.99317	0			1.Extracellular	1.Extracellular, 3.Intra Cellular	0.250427	1	6	ENSG00000102580	GENE-protein_coding	5611	DNAJC3	DNAJC3			false	5611	109	0	1	ASSOCIATED_NEW_GENE	0	0.990957	false	0	5611	0		0	[A8KA82, Q13217, X6R9L0]	5611
			3.54676	0			3.Intra Cellular	3.Intra Cellular	0.281948	1	4	ENSG00000117707	GENE-processed_transcript,protein_coding	5629	PROX1	PROX1			false	5629	327	0	1	ASSOCIATED_NEW_GENE	0	0.992306	false	0	5629	0		0	[C9JU29, Q92786, U3KPY6]	5629
			3.58362	0			1.Extracellular	1.Extracellular, 2.Plasma Membrane, 3.Intra Cellular	0.279048	1	4	ENSG00000197746	GENE-protein_coding,retained_intron	5660	PSAP	PSAP			false	5660	300	0	1	ASSOCIATED_NEW_GENE	0	0.992195	false	0	5660	0		0	[A0A024QZQ2, A0A0J9YXB8, C9JIZ6, L8EA14, P07602, Q5BJH1]	5660
			4.07099	0			2.Plasma Membrane	2.Plasma Membrane	0.245641	1	6	ENSG00000107281	GENE-protein_coding,retained_intron	56654	NPDC1	NPDC1			false	56654	48	0	1	ASSOCIATED_NEW_GENE	0	0.990722	false	0	56654	0		0	[A0A087WYK7, Q5SPY9, Q9NQX5]	56654
			3.57406	0			3.Intra Cellular	3.Intra Cellular	0.279794	1	4	ENSG00000070950	GENE-nonsense_mediated_decay,processed_transcript,protein_coding,retained_intron	56852	RAD18	RAD18			false	56852	307	0	1	ASSOCIATED_NEW_GENE	0	0.992223	false	0	56852	0		0	[A0A024R2I7, C9J0Q4, F8WAZ7, F8WE49, F8WFA6, H7C0A5, H7C3I2, Q9NS91]	56852
			3.58362	0			3.Intra Cellular	3.Intra Cellular	0.279048	1	4	ENSG00000084090	GENE-processed_transcript,protein_coding,retained_intron	56910	STARD7	STARD7			false	56910	300	0	1	ASSOCIATED_NEW_GENE	0	0.992195	false	0	56910	0		0	[C9JTD3, L8E753, Q9NQZ5]	56910
			3.57406	0			0.Annotation definition not found in 'Homo Sapiens.properties' file	0.Annotation definition not found in 'Homo Sapiens.properties' file	0.279794	1	4	ENSG00000163104	GENE-nonsense_mediated_decay,protein_coding,retained_intron	56916	SMARCAD1	SMARCAD1			false	56916	307	0	1	ASSOCIATED_NEW_GENE	0	0.992223	false	0	56916	0		0	[D6RAY8, F8W9M2, Q9H4L7]	56916
			3.58362	0			3.Intra Cellular	3.Intra Cellular, 5.Nucleus	0.279048	1	4	ENSG00000005100	GENE-nonsense_mediated_decay,protein_coding,retained_intron	56919	DHX33	DHX33			false	56919	300	0	1	ASSOCIATED_NEW_GENE	0	0.992195	false	0	56919	0		0	[B4DIS6, I3L0M5, I3L1L6, Q05BE5, Q9H6R0]	56919
			3.57406	0	Transcription Factor Complex		0.Annotation definition not found in 'Homo Sapiens.properties' file	0.Annotation definition not found in 'Homo Sapiens.properties' file	0.279794	1	4	ENSG00000087152	GENE-processed_transcript,protein_coding,retained_intron	56970	ATXN7L3	ATXN7L3			false	56970	307	0	1	ASSOCIATED_NEW_GENE	0	0.992223	false	0	56970	0		0	[K7EJK2, K7EKG9, K7EMZ3, K7ENU1, K7ENZ2, L8E8Y9, Q14CW9]	56970
			3.99317	0			3.Intra Cellular	3.Intra Cellular	0.250427	1	6	ENSG00000173320	GENE-nonsense_mediated_decay,processed_transcript,protein_coding	56977	STOX2	STOX2			false	56977	109	0	1	ASSOCIATED_NEW_GENE	0	0.990957	false	0	56977	0		0	[D6RDA5, H0Y8U0, H0YA59, Q9P2F5]	56977
			3.57406	0			3.Intra Cellular	3.Intra Cellular	0.279794	1	4	ENSG00000241127	GENE-processed_transcript,protein_coding,retained_intron	57002	YAE1	YAE1			false	57002	307	0	1	ASSOCIATED_NEW_GENE	0	0.992223	false	0	57002	0		0	[C9IZ57, Q9NRH1]	57002
			4.06689	0			3.Intra Cellular	3.Intra Cellular	0.245888	1	6	ENSG00000013275	GENE-protein_coding,retained_intron	5704	PSMC4	PSMC4			false	5704	108	0	1	ASSOCIATED_NEW_GENE	0	0.990734	false	0	5704	0		0	[A8K2M0, P43686]	5704
			3.99317	0			3.Intra Cellular	3.Intra Cellular	0.250427	1	6	ENSG00000137812	GENE-nonsense_mediated_decay,processed_transcript,protein_coding,retained_intron	57082	KNL1	KNL1			false	57082	109	0	1	ASSOCIATED_NEW_GENE	0	0.990957	false	0	57082	0		0	[A0A0G2JL96, A0A1Y8EIW7, E9PPJ1, H0YCZ2, H0YEY7, H0YN41, Q8NG31]	57082
			3.99317	0			3.Intra Cellular	3.Intra Cellular	0.250427	1	6	ENSG00000198018	GENE-nonsense_mediated_decay,protein_coding	57089	ENTPD7	ENTPD7			false	57089	109	0	1	ASSOCIATED_NEW_GENE	0	0.990957	false	0	57089	0		0	[Q9NQZ7, S4R3B9]	57089
			3.57406	0			0.Annotation definition not found in 'Homo Sapiens.properties' file	0.Annotation definition not found in 'Homo Sapiens.properties' file	0.279794	1	4	ENSG00000081154	GENE-nonsense_mediated_decay,processed_transcript,protein_coding,retained_intron	57092	PCNP	PCNP			false	57092	307	0	1	ASSOCIATED_NEW_GENE	0	0.992223	false	0	57092	0		0	[A0A0B4J1Z9, G5E9V9, Q8WW12]	57092
			3.57406	0	Transcription Factor Complex		3.Intra Cellular	3.Intra Cellular	0.279794	1	4	ENSG00000156273	GENE-processed_transcript,protein_coding	571	BACH1	BACH1			false	571	307	0	1	ASSOCIATED_NEW_GENE	0	0.992223	false	0	571	0		0	[C9IYH8, C9IYR0, C9JMP6, F8VZL7, H7C4B6, M0QZP0, O14867, Q9BXM4]	571
			3.57406	0			3.Intra Cellular	3.Intra Cellular	0.279794	1	4	ENSG00000047621	GENE-nonsense_mediated_decay,processed_transcript,protein_coding,retained_intron	57102	C12orf4	C12orf4			false	57102	307	0	1	ASSOCIATED_NEW_GENE	0	0.992223	false	0	57102	0		0	[F5GXX6, F5H271, F5H744, H0YGS6, Q9NQ89]	57102
			3.57406	0			0.Annotation definition not found in 'Homo Sapiens.properties' file	0.Annotation definition not found in 'Homo Sapiens.properties' file	0.279794	1	4	ENSG00000170471	GENE-processed_transcript,protein_coding,retained_intron	57148	RALGAPB	RALGAPB			false	57148	307	0	1	ASSOCIATED_NEW_GENE	0	0.992223	false	0	57148	0		0	[A0A0J9YW54, A2A2F0, G1UI28, Q6MZJ2, Q86X10]	57148
			3.99317	0			1.Extracellular	1.Extracellular, 5.Nucleus	0.250427	1	6	ENSG00000011304	GENE-nonsense_mediated_decay,protein_coding,retained_intron	5725	PTBP1	PTBP1			false	5725	109	0	1	ASSOCIATED_NEW_GENE	0	0.990957	false	0	5725	0		0	[A0A087WTS6, A0A087WU68, A0A087WUW5, A0A0D9SF20, A0A0U1RRM4, A0A6Q8PEX4, A0A7I2V4H6, A0A7I2V621, A6NLN1, K7EK45, K7EKJ7, K7ELW5, K7ES59, P26599]	5725
			3.58362	0			1.Extracellular	1.Extracellular, 2.Plasma Membrane, 3.Intra Cellular	0.279048	1	4	ENSG00000171862	GENE-nonsense_mediated_decay,processed_transcript,protein_coding,retained_intron	5728	PTEN	PTEN			false	5728	300	0	1	ASSOCIATED_NEW_GENE	0	0.992195	false	0	5728	0		0	[A0A024QYR6, A0A087X033, A0A142FGX1, A0A1V0DNR7, A0A2P0XNP6, A0A2R4SE35, A0A386NBZ2, A0A386NCS8, F6KD01, H6WA46, H6WA51, H6WA52, P60484]	5728
			3.58362	0			3.Intra Cellular	3.Intra Cellular	0.279048	1	4	ENSG00000134247	GENE-processed_transcript,protein_coding	5738	PTGFRN	PTGFRN			false	5738	300	0	1	ASSOCIATED_NEW_GENE	0	0.992195	false	0	5738	0		0	[A0A024R0J4, A4QPA1, Q1WWL2, Q4QQP8, Q9P2B2]	5738
			3.99317	0			3.Intra Cellular	3.Intra Cellular	0.250427	1	6	ENSG00000128578	GENE-protein_coding,retained_intron	57464	STRIP2	STRIP2			false	57464	109	0	1	ASSOCIATED_NEW_GENE	0	0.990957	false	0	57464	0		0	[Q9ULQ0]	57464
			3.58362	0			2.Plasma Membrane	2.Plasma Membrane, 3.Intra Cellular	0.279048	1	4	ENSG00000113300	GENE-processed_transcript,protein_coding	57472	CNOT6	CNOT6			false	57472	300	0	1	ASSOCIATED_NEW_GENE	0	0.992195	false	0	57472	0		0	[D6R9H6, Q8TAJ0, Q9ULM6]	57472
			3.58362	0			0.Annotation definition not found in 'Homo Sapiens.properties' file	0.Annotation definition not found in 'Homo Sapiens.properties' file	0.279048	1	4	ENSG00000103404	GENE-protein_coding	57478	USP31	USP31			false	57478	300	0	1	ASSOCIATED_NEW_GENE	0	0.992195	false	0	57478	0		0	[A0A087WXV9, I3L4X5, Q70CQ4]	57478
			3.58362	0			3.Intra Cellular	3.Intra Cellular	0.279048	1	4	ENSG00000250423	GENE-protein_coding	57481	KIAA1210	KIAA1210			false	57481	300	0	1	ASSOCIATED_NEW_GENE	0	0.992195	false	0	57481	0		0	[Q9ULL0]	57481
			4.16655	0			3.Intra Cellular	3.Intra Cellular	0.240007	1	6	ENSG00000166532	GENE-nonsense_mediated_decay,processed_transcript,protein_coding,retained_intron	57494	RIMKLB	RIMKLB			false	57494	58	0	1	ASSOCIATED_NEW_GENE	0	0.990433	false	0	57494	0		0	[F5GZH5, F5H3V4, F5H552, L8EB22, Q9ULI2]	57494
			3.58362	0			2.Plasma Membrane	2.Plasma Membrane	0.279048	1	4	ENSG00000146938	GENE-processed_transcript,protein_coding	57502	NLGN4X	NLGN4X			false	57502	300	0	1	ASSOCIATED_NEW_GENE	0	0.992195	false	0	57502	0		0	[A0A024RBV0, A0A2R8Y6F7, A0A2R8YCI5, A8K4S1, B3KP11, Q8N0W4]	57502
			3.58362	0			3.Intra Cellular	3.Intra Cellular	0.279048	1	4	ENSG00000124608	GENE-processed_transcript,protein_coding	57505	AARS2	AARS2			false	57505	300	0	1	ASSOCIATED_NEW_GENE	0	0.992195	false	0	57505	0		0	[A2VCL8, Q5JTZ9]	57505
			3.57406	0			0.Annotation definition not found in 'Homo Sapiens.properties' file	0.Annotation definition not found in 'Homo Sapiens.properties' file	0.279794	1	4	ENSG00000150477	GENE-nonsense_mediated_decay,processed_transcript,protein_coding,retained_intron	57536	KIAA1328	KIAA1328			false	57536	307	0	1	ASSOCIATED_NEW_GENE	0	0.992223	false	0	57536	0		0	[K7EJ61, K7EM46, K7EP66, M0QYQ2, Q86T90]	57536
			3.58362	0			2.Plasma Membrane	2.Plasma Membrane, 3.Intra Cellular	0.279048	1	4	ENSG00000184985	GENE-processed_transcript,protein_coding	57537	SORCS2	SORCS2			false	57537	300	0	1	ASSOCIATED_NEW_GENE	0	0.992195	false	0	57537	0		0	[B5MED8, H0Y9I2, L8ECI9, Q96PQ0]	57537
			4.16655	0			0.Annotation definition not found in 'Homo Sapiens.properties' file	0.Annotation definition not found in 'Homo Sapiens.properties' file	0.240007	1	6	ENSG00000197024	GENE-processed_transcript,protein_coding	57541	ZNF398	ZNF398			false	57541	58	0	1	ASSOCIATED_NEW_GENE	0	0.990433	false	0	57541	0		0	[A0A090N7S8, A0A090N8F2, B4DXA9, Q8TD17]	57541
			3.57406	0			3.Intra Cellular	3.Intra Cellular	0.279794	1	4	ENSG00000172840	GENE-processed_transcript,protein_coding	57546	PDP2	PDP2			false	57546	307	0	1	ASSOCIATED_NEW_GENE	0	0.992223	false	0	57546	0		0	[H3BQX2, H3BRB7, H3BSA5, H3BTU5, H3BV50, Q9P2J9]	57546
			3.58362	0			3.Intra Cellular	3.Intra Cellular	0.279048	1	4	ENSG00000138134	GENE-processed_transcript,protein_coding,retained_intron	57559	STAMBPL1	STAMBPL1			false	57559	300	0	1	ASSOCIATED_NEW_GENE	0	0.992195	false	0	57559	0		0	[Q96FJ0]	57559
			3.58362	0			0.Annotation definition not found in 'Homo Sapiens.properties' file	0.Annotation definition not found in 'Homo Sapiens.properties' file	0.279048	1	4	ENSG00000166188	GENE-protein_coding	57567	ZNF319	ZNF319			false	57567	300	0	1	ASSOCIATED_NEW_GENE	0	0.992195	false	0	57567	0		0	[H3BT69, Q9P2F9]	57567
			4.06689	0			3.Intra Cellular	3.Intra Cellular	0.245888	1	6	ENSG00000187514	GENE-nonsense_mediated_decay,processed_transcript,protein_coding,retained_intron	5757	PTMA	PTMA			false	5757	108	0	1	ASSOCIATED_NEW_GENE	0	0.990734	false	0	5757	0		0	[A0A024R476, B8ZZA1, B8ZZQ6, B8ZZW7, F8WCE8, H7C031, H7C2N1, P06454, Q15254, Q53S24, Q7KZ52, Q8TBK9, Q9NYD3]	5757
			3.57406	0			0.Annotation definition not found in 'Homo Sapiens.properties' file	0.Annotation definition not found in 'Homo Sapiens.properties' file	0.279794	1	4	ENSG00000082269	GENE-nonsense_mediated_decay,processed_transcript,protein_coding,retained_intron	57579	FAM135A	FAM135A			false	57579	307	0	1	ASSOCIATED_NEW_GENE	0	0.992223	false	0	57579	0		0	[D6RC17, D6RCC7, D6REA8, D6RFG9, H7BXC5, Q9P2D6]	57579
			4.07099	0			3.Intra Cellular	3.Intra Cellular	0.245641	1	6	ENSG00000114742	GENE-nonsense_mediated_decay,processed_transcript,protein_coding	57599	WDR48	WDR48			false	57599	48	0	1	ASSOCIATED_NEW_GENE	0	0.990722	false	0	57599	0		0	[A0A024R2L1, C9JC24, F8W6P2, F8W7Q3, F8W7Y5, F8W9K4, L8EA86, Q8TAF3]	57599
			4.07099	0			3.Intra Cellular	3.Intra Cellular	0.245641	1	6	ENSG00000076826	GENE-protein_coding,retained_intron	57662	CAMSAP3	CAMSAP3			false	57662	48	0	1	ASSOCIATED_NEW_GENE	0	0.990722	false	0	57662	0		0	[Q9P1Y5]	57662
			4.06689	0			0.Annotation definition not found in 'Homo Sapiens.properties' file	0.Annotation definition not found in 'Homo Sapiens.properties' file	0.245888	1	6	ENSG00000151553	GENE-protein_coding	57700	FHIP2A	FHIP2A			false	57700	108	0	1	ASSOCIATED_NEW_GENE	0	0.990734	false	0	57700	0		0	[Q5W0V1, Q5W0V3, Q5W0V4]	57700
			3.57406	0			2.Plasma Membrane	2.Plasma Membrane	0.279794	1	4	ENSG00000103742	GENE-processed_transcript,protein_coding,retained_intron	57722	IGDCC4	IGDCC4			false	57722	307	0	1	ASSOCIATED_NEW_GENE	0	0.992223	false	0	57722	0		0	[Q8TDY8]	57722
			3.57406	0			2.Plasma Membrane	2.Plasma Membrane, 3.Intra Cellular	0.279794	1	4	ENSG00000197562	GENE-nonsense_mediated_decay,protein_coding,retained_intron	57799	RAB40C	RAB40C			false	57799	307	0	1	ASSOCIATED_NEW_GENE	0	0.992223	false	0	57799	0		0	[H3BME4, H3BMH4, H3BNV8, H3BPA5, H3BPB1, H3BTC6, H3BUX0, Q96S21]	57799
			3.54676	0			3.Intra Cellular	3.Intra Cellular	0.281948	1	4	ENSG00000179295	GENE-nonsense_mediated_decay,processed_transcript,protein_coding,retained_intron	5781	PTPN11	PTPN11			false	5781	327	0	1	ASSOCIATED_NEW_GENE	0	0.992306	false	0	5781	0		0	[A0A0U1RRI0, A0A1W2PPU4, A0A3G1LBG2, A0A6C0W4U5, A0A6C0W4U7, A0A6C0W4W9, A0A6C0W4X1, A0A6C0W4X6, A0A6C0W4Y0, A0A6C0W4Z3, A0A6C0W4Z4, A0A6C0W501, A0A6C0W513, A0A6C0W521, A0A6C0W5F8, A0A6C0W5F9, A0A6C0W5H1, A0A6C0W5J5, A0A6C0W5K7, A0A6C0W5S4, A0A6C0W5U2, A0A6C0W5U7, A0A6C0W5V7, A0A6C0W5X7, A0A6C0W5Z9, A0A6C0W611, A0A6C0W636, A0A6C0W750, A0A6C0W763, A0A6C0W8D9, A0A6C0W8E6, A0A6C0W8I3, B3GUD3, B3GUD4…	5781
			4.16655	0			1.Extracellular	1.Extracellular, 2.Plasma Membrane, 3.Intra Cellular	0.240007	1	6	ENSG00000123728	GENE-processed_transcript,protein_coding	57826	RAP2C	RAP2C			false	57826	58	0	1	ASSOCIATED_NEW_GENE	0	0.990433	false	0	57826	0		0	[A0A087X2C3, Q9Y3L5]	57826
			3.58362	0			3.Intra Cellular	3.Intra Cellular	0.279048	1	4	ENSG00000152104	GENE-processed_transcript,protein_coding	5784	PTPN14	PTPN14			false	5784	300	0	1	ASSOCIATED_NEW_GENE	0	0.992195	false	0	5784	0		0	[A8K6H6, E2J9M0, Q15678, Q6PJC3]	5784
			3.57406	0			1.Extracellular	1.Extracellular, 3.Intra Cellular	0.279794	1	4	ENSG00000143632	GENE-protein_coding	58	ACTA1	ACTA1			false	58	307	0	1	ASSOCIATED_NEW_GENE	0	0.992223	false	0	58	0		0	[A0A804HKV3, A6NL76, P68133, Q7Z7J6]	58
			3.57406	0			2.Plasma Membrane	2.Plasma Membrane, 3.Intra Cellular	0.279794	1	4	ENSG00000136379	GENE-processed_transcript,protein_coding	58489	ABHD17C	ABHD17C			false	58489	307	0	1	ASSOCIATED_NEW_GENE	0	0.992223	false	0	58489	0		0	[H0YN98, Q6PCB6]	58489
			3.99317	0			2.Plasma Membrane	2.Plasma Membrane, 3.Intra Cellular	0.250427	1	6	ENSG00000140463	GENE-nonsense_mediated_decay,processed_transcript,protein_coding,retained_intron	585	BBS4	BBS4			false	585	109	0	1	ASSOCIATED_NEW_GENE	0	0.990957	false	0	585	0		0	[A0A0S2Z328, A0A0S2Z3A9, H3BN76, H3BPP7, H3BQV7, H3BRY9, H3BSE2, H3BSL2, H3BU58, H3BUQ7, H3BUU1, H3BV56, Q96RK4]	585
			3.99317	0			1.Extracellular	1.Extracellular, 2.Plasma Membrane, 3.Intra Cellular	0.250427	1	6	ENSG00000169213	GENE-protein_coding	5865	RAB3B	RAB3B			false	5865	109	0	1	ASSOCIATED_NEW_GENE	0	0.990957	false	0	5865	0		0	[P20337]	5865
			3.58362	0			1.Extracellular	1.Extracellular, 2.Plasma Membrane, 3.Intra Cellular	0.279048	1	4	ENSG00000111540	GENE-nonsense_mediated_decay,protein_coding,retained_intron	5869	RAB5B	RAB5B			false	5869	300	0	1	ASSOCIATED_NEW_GENE	0	0.992195	false	0	5869	0		0	[A0A024RB09, F8VPW9, F8VUA5, F8VVZ0, F8VWZ7, P61020, Q6FI54]	5869
			3.57406	0			3.Intra Cellular	3.Intra Cellular	0.279794	1	4	ENSG00000172613	GENE-nonsense_mediated_decay,processed_transcript,protein_coding,retained_intron	5883	RAD9A	RAD9A			false	5883	307	0	1	ASSOCIATED_NEW_GENE	0	0.992223	false	0	5883	0		0	[A0A0G2JMD0, C4TNW7, C4TNW8, F5H492, F5H4F1, F5H8A2, Q99638]	5883
			3.99317	0			3.Intra Cellular	3.Intra Cellular	0.250427	1	6	ENSG00000119318	GENE-protein_coding	5887	RAD23B	RAD23B			false	5887	109	0	1	ASSOCIATED_NEW_GENE	0	0.990957	false	0	5887	0		0	[B7Z4W4, H0Y579, L8EA19, P54727, Q5W0S4, Q5W0S5]	5887
			3.58362	0			3.Intra Cellular	3.Intra Cellular	0.279048	1	4	ENSG00000051180	GENE-nonsense_mediated_decay,protein_coding	5888	RAD51	RAD51			false	5888	300	0	1	ASSOCIATED_NEW_GENE	0	0.992195	false	0	5888	0		0	[E9PI54, E9PJ30, E9PNT5, H0YD61, Q06609, Q9NZG9]	5888
			3.58362	0			2.Plasma Membrane	2.Plasma Membrane, 3.Intra Cellular	0.279048	1	4	ENSG00000132155	GENE-nonsense_mediated_decay,protein_coding,retained_intron	5894	RAF1	RAF1			false	5894	300	0	1	ASSOCIATED_NEW_GENE	0	0.992195	false	0	5894	0		0	[A0A0B4J1W9, A0A0S2Z4L5, A0A0S2Z559, H7C155, L7RRS6, P04049, W0UUR6]	5894
			3.54676	0			1.Extracellular	1.Extracellular, 2.Plasma Membrane, 3.Intra Cellular	0.281948	1	4	ENSG00000006451	GENE-nonsense_mediated_decay,processed_transcript,protein_coding	5898	RALA	RALA			false	5898	327	0	1	ASSOCIATED_NEW_GENE	0	0.992306	false	0	5898	0		0	[C9JPE8, H7C3P7, P11233]	5898
			3.54676	0			1.Extracellular	1.Extracellular, 2.Plasma Membrane, 3.Intra Cellular	0.281948	1	4	ENSG00000127314	GENE-processed_transcript,protein_coding,retained_intron	5908	RAP1B	RAP1B			false	5908	327	0	1	ASSOCIATED_NEW_GENE	0	0.992306	false	0	5908	0		0	[A0A024RB87, B7ZAY2, B7ZB78, E7ESV4, F5GWU8, F5GX62, F5GYB5, F5GYH7, F5GZG1, F5H004, F5H077, F5H0B7, F5H0S2, F5H491, F5H4H0, F5H500, F5H6R7, F5H7Y6, F5H823, F8WBC0, P61224]	5908
			3.58362	0	Transcription Factor Complex		3.Intra Cellular	3.Intra Cellular	0.279048	1	4	ENSG00000139687	GENE-nonsense_mediated_decay,processed_transcript,protein_coding,retained_intron	5925	RB1	RB1			false	5925	300	0	1	ASSOCIATED_NEW_GENE	0	0.992195	false	0	5925	0		0	[A0A024RDV3, A0A0X9QC09, A0A2R8Y743, A0A2R8YFL6, A0A385FS12, A0A385FS25, A0A385FS33, A0A385FS38, A0A385FS40, A0A385FS41, A0A385FS44, A0A385FS48, A0A385FS65, A0A3B3IS71, P06400, P78495, Q2PMD0, Q6DUF0, Q6LE65, Q6LE76, Q6LE77, Q6LE79, Q6LE80, Q6LE81, Q6LE82, Q7KZ59, Q7KZ60, Q7KZ61, Q7Z5Q6, Q86WG4, Q92727, Q92728, V9GZJ8, V9GZQ2, V9H012, V9H020, V9H058, V9H0A9, V9H0D2]	5925
			3.57406	0			2.Plasma Membrane	2.Plasma Membrane, 3.Intra Cellular	0.279794	1	4	ENSG00000142408	GENE-protein_coding	59283	CACNG8	CACNG8			false	59283	307	0	1	ASSOCIATED_NEW_GENE	0	0.992223	false	0	59283	0		0	[A0A1X7SBR8, Q8WXS5]	59283
			3.57406	0			1.Extracellular	1.Extracellular, 2.Plasma Membrane, 3.Intra Cellular	0.279794	1	4	ENSG00000137710	GENE-nonsense_mediated_decay,processed_transcript,protein_coding,retained_intron	5962	RDX	RDX			false	5962	307	0	1	ASSOCIATED_NEW_GENE	0	0.992223	false	0	5962	0		0	[A0A2R8Y4H6, A0A2R8Y5P0, A0A2R8Y5S7, A0A2R8Y7M3, B0YJ88, E9PKN5, E9PN07, E9PNP4, E9PNV3, E9PQ82, E9PRS5, P35241, Q05CU6, Q6PKD3]	5962
			3.57406	0			0.Annotation definition not found in 'Homo Sapiens.properties' file	0.Annotation definition not found in 'Homo Sapiens.properties' file	0.279794	1	4	ENSG00000049541	GENE-nonsense_mediated_decay,processed_transcript,protein_coding	5982	RFC2	RFC2			false	5982	307	0	1	ASSOCIATED_NEW_GENE	0	0.992223	false	0	5982	0		0	[A0A087WVY3, B5BUD2, F8WC37, F8WDC9, H7C596, H7C5A0, H7C5G4, H7C5P1, H7C5P4, H7C5Q7, H7C5S7, P35250, Q75MT5]	5982
			3.57406	0	Transcription Factor Complex		0.Annotation definition not found in 'Homo Sapiens.properties' file	0.Annotation definition not found in 'Homo Sapiens.properties' file	0.279794	1	4	ENSG00000143390	GENE-nonsense_mediated_decay,processed_transcript,protein_coding,retained_intron	5993	RFX5	RFX5			false	5993	307	0	1	ASSOCIATED_NEW_GENE	0	0.992223	false	0	5993	0		0	[A0A0A0MSM9, A0A0A0MSQ2, A0A0A0MT34, F2Z2G0, F6R6G4, F6S3S0, F6UE82, F6X9D6, F8W689, F8WDU3, F8WFE4, H0Y4B4, P48382]	5993
			3.99317	0			1.Extracellular	1.Extracellular, 2.Plasma Membrane, 3.Intra Cellular	0.250427	1	6	ENSG00000075624	GENE-nonsense_mediated_decay,processed_transcript,protein_coding,retained_intron	60	ACTB	ACTB			false	60	109	0	1	ASSOCIATED_NEW_GENE	0	0.990957	false	0	60	0		0	[A0A2R8Y793, A0A2R8YEA7, A0A2R8YFE2, A0A2R8YGF8, A0A510GJR4, A0A6Q8PFE4, A0A6Q8PGD7, A0A6Q8PH58, A0AUL6, C9JTX5, C9JUM1, C9JZR7, E7EVS6, G5E9R0, G8FSY7, P60709, Q1KLZ0, Q9UMN3]	60
			3.57406	0			2.Plasma Membrane	2.Plasma Membrane	0.279794	1	4	ENSG00000187010	GENE-processed_transcript,protein_coding,retained_intron	6007	RHD	RHD			false	6007	307	0	1	ASSOCIATED_NEW_GENE	0	0.992223	false	0	6007	0		0	[A0A023W4F4, A0A023W596, A0A059XI04, A0A059XMR3, A0A068J745, A0A078BRP7, A0A078N210, A0A096ZG20, A0A098E5P3, A0A0A1CEV8, A0A0A1CJK9, A0A0A1TE45, A0A0A1TJK6, A0A0A1TSG7, A0A0A1TST1, A0A0A1TTP9, A0A0A8WEA9, A0A0A8WGH0, A0A0A8WIW4, A0A0D6EFI1, A0A0E4AYH7, A0A0E4FHS6, A0A0K0QNW0, A0A0K0QP18, A0A0K0QP22, A0A0K0QP25, A0A0K0QPX0, A0A0P1IVP9, A0A0P1IVQ0, A0A0P1IVV5, A0A0S1Z226, A0A0U5KVZ8, A0A120HTJ0, A0…	6007
			4.06689	0			2.Plasma Membrane	2.Plasma Membrane, 3.Intra Cellular	0.245888	1	6	ENSG00000069399	GENE-processed_transcript,protein_coding,retained_intron	602	BCL3	BCL3			false	602	108	0	1	ASSOCIATED_NEW_GENE	0	0.990734	false	0	602	0		0	[B7Z3N9, H7C0A2, P20749]	602
			3.54676	0			3.Intra Cellular	3.Intra Cellular	0.281948	1	4	ENSG00000121481	GENE-protein_coding,retained_intron	6045	RNF2	RNF2			false	6045	327	0	1	ASSOCIATED_NEW_GENE	0	0.992306	false	0	6045	0		0	[Q99496, X6RFN3]	6045
			3.99317	0			2.Plasma Membrane	2.Plasma Membrane, 3.Intra Cellular, 5.Nucleus	0.250427	1	6	ENSG00000069667	GENE-nonsense_mediated_decay,processed_transcript,protein_coding,retained_intron	6095	RORA	RORA			false	6095	109	0	1	ASSOCIATED_NEW_GENE	0	0.990957	false	0	6095	0		0	[A0A087X2G0, A0A0C4DFP5, A0A0C4DG53, H0YII6, H0YLS5, P35398]	6095
			4.06689	0			2.Plasma Membrane	2.Plasma Membrane	0.245888	1	6	ENSG00000099822	GENE-protein_coding	610	HCN2	HCN2			false	610	108	0	1	ASSOCIATED_NEW_GENE	0	0.990734	false	0	610	0		0	[Q9UL51]	610
			3.58362	0			3.Intra Cellular	3.Intra Cellular, 5.Nucleus	0.279048	1	4	ENSG00000108298	GENE-nonsense_mediated_decay,protein_coding,retained_intron	6143	RPL19	RPL19			false	6143	300	0	1	ASSOCIATED_NEW_GENE	0	0.992195	false	0	6143	0		0	[A0A7I2V2L0, A0A7I2V4U6, A0A7I2V512, A0A7I2V638, A0A7I2YQG2, J3KTE4, J3QR09, P84098]	6143
			3.58362	0			1.Extracellular	1.Extracellular, 3.Intra Cellular	0.279048	1	4	ENSG00000116251	GENE-protein_coding,retained_intron	6146	RPL22	RPL22			false	6146	300	0	1	ASSOCIATED_NEW_GENE	0	0.992195	false	0	6146	0		0	[K7EJT5, K7ELC4, K7EMH1, K7EP65, K7ERI7, L8E9H0, P35268, Q8WYP0, Q9BYF5]	6146
			3.57406	0			1.Extracellular	1.Extracellular, 3.Intra Cellular	0.279794	1	4	ENSG00000071082	GENE-nonsense_mediated_decay,protein_coding	6160	RPL31	RPL31			false	6160	307	0	1	ASSOCIATED_NEW_GENE	0	0.992223	false	0	6160	0		0	[B7Z4C8, B7Z4E3, B8ZZK4, C9JU56, H7C2W9, P62899]	6160
			3.99317	0			1.Extracellular	1.Extracellular, 3.Intra Cellular	0.250427	1	6	ENSG00000182899	GENE-nonsense_mediated_decay,processed_transcript,protein_coding,retained_intron	6165	RPL35A	RPL35A			false	6165	109	0	1	ASSOCIATED_NEW_GENE	0	0.990957	false	0	6165	0		0	[C9K025, F8WB72, F8WBS5, P18077]	6165
			3.58362	0			3.Intra Cellular	3.Intra Cellular	0.279048	1	4	ENSG00000074582	GENE-processed_transcript,protein_coding,retained_intron	617	BCS1L	BCS1L			false	617	300	0	1	ASSOCIATED_NEW_GENE	0	0.992195	false	0	617	0		0	[A0A024R445, A0A0S2Z3G6, A0A2R8Y7T3, A8BSR7, A8JZZ8, C9J1S9, C9J4Q9, C9J8G3, C9JAS4, H7BZF6, H7C492, Q53RT4, Q9Y276]	617
			3.57406	0			3.Intra Cellular	3.Intra Cellular	0.279794	1	4	ENSG00000262814	GENE-protein_coding	6182	MRPL12	MRPL12			false	6182	307	0	1	ASSOCIATED_NEW_GENE	0	0.992223	false	0	6182	0		0	[P52815]	6182
			3.58362	0			3.Intra Cellular	3.Intra Cellular	0.279048	1	4	ENSG00000118705	GENE-nonsense_mediated_decay,processed_transcript,protein_coding	6185	RPN2	RPN2			false	6185	300	0	1	ASSOCIATED_NEW_GENE	0	0.992195	false	0	6185	0		0	[F2Z3K5, H0Y5M1, P04844, Q5JYR3, Q5JYR4, Q5JYR7]	6185
			3.58362	0			0.Annotation definition not found in 'Homo Sapiens.properties' file	0.Annotation definition not found in 'Homo Sapiens.properties' file	0.279048	1	4	ENSG00000164684	GENE-processed_transcript,protein_coding	619279	ZNF704	ZNF704			false	619279	300	0	1	ASSOCIATED_NEW_GENE	0	0.992195	false	0	619279	0		0	[E5RGL7, Q6ZNC4]	619279
			3.57406	0			3.Intra Cellular	3.Intra Cellular, 5.Nucleus	0.279794	1	4	ENSG00000137154	GENE-processed_transcript,protein_coding	6194	RPS6	RPS6			false	6194	307	0	1	ASSOCIATED_NEW_GENE	0	0.992223	false	0	6194	0		0	[A2A3R5, A2A3R6, A2A3R7, D3DRJ5, P62753, Q96DV6]	6194
			4.07099	0			3.Intra Cellular	3.Intra Cellular, 5.Nucleus	0.245641	1	6	ENSG00000124614	GENE-protein_coding,retained_intron	6204	RPS10	RPS10			false	6204	48	0	1	ASSOCIATED_NEW_GENE	0	0.990722	false	0	6204	0		0	[A0A2R8Y7H1, A0A2R8YFH6, F6U211, P46783]	6204
			4.36724	0			1.Extracellular	1.Extracellular, 3.Intra Cellular	0.228978	1	6	ENSG00000105193	GENE-protein_coding,retained_intron	6217	RPS16	RPS16			false	6217	31	0	1	ASSOCIATED_NEW_GENE	0	0.989827	false	0	6217	0		0	[M0QX76, M0R1M5, M0R210, M0R3H0, P62249, Q6IPX4]	6217
			3.58362	0			1.Extracellular	1.Extracellular, 2.Plasma Membrane, 3.Intra Cellular, 5.Nucleus	0.279048	1	4	ENSG00000143947	GENE-protein_coding,retained_intron	6233	RPS27A	RPS27A			false	6233	300	0	1	ASSOCIATED_NEW_GENE	0	0.992195	false	0	6233	0		0	[B2RDW1, J3QTR3, P62979, Q49A90, Q5RKT7, Q8WYN9]	6233
			3.57406	0			2.Plasma Membrane	2.Plasma Membrane, 3.Intra Cellular	0.279794	1	4	ENSG00000166592	GENE-protein_coding,retained_intron	6236	RRAD	RRAD			false	6236	307	0	1	ASSOCIATED_NEW_GENE	0	0.992223	false	0	6236	0		0	[A0A024R6X0, J3KRG9, J3KSM6, P55042]	6236
			3.57406	0			3.Intra Cellular	3.Intra Cellular	0.279794	1	4	ENSG00000167325	GENE-nonsense_mediated_decay,processed_transcript,protein_coding,retained_intron	6240	RRM1	RRM1			false	6240	307	0	1	ASSOCIATED_NEW_GENE	0	0.992223	false	0	6240	0		0	[B4DXD1, B4E0I8, E9PJ62, E9PL69, E9PP77, E9PRY9, H0YCY7, P23921]	6240
			3.58362	0			3.Intra Cellular	3.Intra Cellular	0.279048	1	4	ENSG00000100241	GENE-nonsense_mediated_decay,processed_transcript,protein_coding,retained_intron	6305	SBF1	SBF1			false	6305	300	0	1	ASSOCIATED_NEW_GENE	0	0.992195	false	0	6305	0		0	[H0Y5W8, O95248, Q6PGN5, Q86TK5]	6305
			3.57406	0			3.Intra Cellular	3.Intra Cellular	0.279794	1	4	ENSG00000204842	GENE-nonsense_mediated_decay,processed_transcript,protein_coding,retained_intron	6311	ATXN2	ATXN2			false	6311	307	0	1	ASSOCIATED_NEW_GENE	0	0.992223	false	0	6311	0		0	[A0A2R8Y5A6, A0A2R8Y6W7, A0A2R8Y7E6, A0A2R8Y7P6, A0A2R8YCG6, A0A2R8YDM9, A0A2R8YGV1, A0A5F9ZH85, A0A5F9ZHG6, A0A5F9ZHH4, A0A5F9ZHW5, A0A5F9ZHX3, A0A5F9ZI57, F8VQP2, F8VRK6, F8VZC1, F8W0B5, F8WB05, F8WB06, H0YH87, Q2M2R5, Q99700, S4R3J6, S4R3R6, V9GY86]	6311
			4.06689	0			1.Extracellular	1.Extracellular, 3.Intra Cellular	0.245888	1	6	ENSG00000132692	GENE-nonsense_mediated_decay,protein_coding,retained_intron	63827	BCAN	BCAN			false	63827	108	0	1	ASSOCIATED_NEW_GENE	0	0.990734	false	0	63827	0		0	[L8E931, Q5T3I6, Q5T3I7, Q5T3I8, Q96GW7, V9GXZ8, V9GY88]	63827
			3.58362	0			3.Intra Cellular	3.Intra Cellular	0.279048	1	4	ENSG00000204370	GENE-nonsense_mediated_decay,protein_coding	6392	SDHD	SDHD			false	6392	300	0	1	ASSOCIATED_NEW_GENE	0	0.992195	false	0	6392	0		0	[A0A0S2Z4H7, A0A0S2Z4J3, A0A1W2PNY0, E9PK73, G3V173, H0YD41, H0YD96, O14521]	6392
[truncated: 209 more rows]

## Sheet: CluePedia MTI edges
edge-label	EDGE_UNIQUE_SUID	Edge Betweenness	EVIDENCE_CODE	INITIAL_SOURCE_NAME	INITIAL_TARGET_NAME	interaction	Kappa Score	name	selected	shared interaction	shared name	SOURCE_NAME	SOURCE_SYMBOL_NAME	TARGET_NAME	TARGET_SYMBOL_NAME	UNIQUE_ID	validated miRNA	validated miRTarBase
[truncated: 1,693 more rows]

[truncated: 5 more sheets: miR Targets, ClueGO Results, Selected PPI MTI input, PPI MTI nodo, PPI MTI edge]
