# Supplementary material for: miRNA Expression Profiles in Isolated Ventricular Cardiomyocytes: Insights into Doxorubicin-Induced Cardiotoxicity
Source: Int J Mol Sci. 2024 May 12;25(10):5272. doi: 10.3390/ijms25105272 (PMC11121573; doi:10.3390/ijms25105272)
Supplement: Supplementary file 1 [file ijms-25-05272-s001.zip › Tabla S2. 22h Network ClueGO CluePedia Analysis.xlsx]

## Sheet: CluePedia MTI
MTI CluePedia Network analysis
Summary Statistics			CluePedia enrich: All MTI for each miRNA, up to 300 genes, DB mirTarBase (15.06.2016) and mirecords (2010.11.25), Score=0.6
Number of nodes: 742
Number of edges: 795
Avg. number of neighbors: 2,092
Network diameter: 6
Network radius: 3
Characteristic path length: 3,564
Clustering coefficient: 0,000
Network density: 0,003
Network heterogeneity: 6,812
Network centralization: 0,424
Connected components: 2
Analysis time (sec): 0,162
Cluster #1 up		Cluster #2 down
hsa-miR-34a-5p		hsa-miR-99b-5p
hsa-miR-425-5p		hsa-miR-133a-1-3p
hsa-miR-136-5p		pal-miR-378c-5p
		hsa-miR-24-1-5p

## Sheet: CluePedia MTI node
%Genes Cluster #	%Genes Cluster #1	%Genes Cluster #2	AverageShortestPathLength	BetweennessCentrality	CEREBRAL_DOWNSTRAM_INFO	CEREBRAL_DOWNSTRAM_INFO_ALL	CEREBRAL_LOCALIZATION_INFO	CEREBRAL_LOCALIZATION_INFO_ALL	ClosenessCentrality	Degree	Eccentricity	ENSEMBL_GENE_ID	GeneType	GOGroups	ID	Term	Input Gene ID	IsSingleNode	name	NeighborhoodConnectivity	NumberOfDirectedEdges	NumberOfUndirectedEdges	OverViewTerm	PartnerOfMultiEdgedNodePairs	Radiality	selected	SelfLoops	shared name	Stress	TopologicalCoefficient	UniProtKB_AC	UNIQUE_ID
100	100	0	2.20946	0.667582			0.Annotation definition not found in 'Homo Sapiens.properties' file	0.Annotation definition not found in 'Homo Sapiens.properties' file	0.452599	330	5			ASSOCIATED_GENE	hsa-miR-34a-5p	hsa-miR-34a-5p	NaN	false	MIMAT0000255	1.10159	0	330	ASSOCIATED_GENE	15	0.99616	false	0	MIMAT0000255	2913114	0.0253968		MIMAT0000255
100	100	0	2.59595	0.386735			0.Annotation definition not found in 'Homo Sapiens.properties' file	0.Annotation definition not found in 'Homo Sapiens.properties' file	0.385216	147	3			ASSOCIATED_GENE	hsa-miR-136-5p	hsa-miR-136-5p	NaN	false	MIMAT0000448	1.11565	0	147	ASSOCIATED_GENE	0	0.994934	false	0	MIMAT0000448	1284650	0.0231293		MIMAT0000448
100	100	0	2.81757	0.297816			0.Annotation definition not found in 'Homo Sapiens.properties' file	0.Annotation definition not found in 'Homo Sapiens.properties' file	0.354916	132	5			ASSOCIATED_GENE	hsa-miR-425-5p	hsa-miR-425-5p	NaN	false	MIMAT0003393	1.11364	0	132	ASSOCIATED_GENE	0	0.99423	false	0	MIMAT0003393	1503928	0.0378788		MIMAT0003393
200	0	100	2.76892	0.253114			0.Annotation definition not found in 'Homo Sapiens.properties' file	0.Annotation definition not found in 'Homo Sapiens.properties' file	0.361152	112	5			ASSOCIATED_GENE	hsa-miR-133a	hsa-miR-133a	NaN	false	MIMAT0000427	1.09259	0	112	ASSOCIATED_GENE	4	0.994384	false	0	MIMAT0000427	533174	0.0231481		MIMAT0000427
200	0	100	3.25	0.109671			0.Annotation definition not found in 'Homo Sapiens.properties' file	0.Annotation definition not found in 'Homo Sapiens.properties' file	0.307692	48	5			ASSOCIATED_GENE	hsa-miR-99b-5p	hsa-miR-99b-5p	NaN	false	MIMAT0000689	1.14583	0	48	ASSOCIATED_GENE	0	0.992857	false	0	MIMAT0000689	694142	0.0486111		MIMAT0000689
200	0	100	4.46081	0.0638555			0.Annotation definition not found in 'Homo Sapiens.properties' file	0.Annotation definition not found in 'Homo Sapiens.properties' file	0.224174	26	5			ASSOCIATED_GENE	hsa-miR-24-1-5p	hsa-miR-24-1-5p	NaN	false	MIMAT0000079	1.04	0	26	ASSOCIATED_GENE	1	0.989013	false	0	MIMAT0000079	186792	0.04		MIMAT0000079
			2.76757	0.0177478			3.Intra Cellular	3.Intra Cellular, 4.Nuclear Membrane	0.361328	3	4	ENSG00000171791	GENE-nonsense_mediated_decay,processed_transcript,protein_coding	596	BCL2	BCL2		false	596	231	0	3	ASSOCIATED_NEW_GENE	1	0.994389	false	0	596	99666	0.509978	[A0A024R2B3, A0A024R2C4, A0A1L4AQQ4, A0A1L4AQQ5, A0A1L4AQQ8, A0A1L4AQR0, A0A1L4AQR6, A0A7I2V3S7, A0A7I2V4W1, A0A7I2V5Q7, A0A7I2V5Q9, A0N771, P10415, Q96PA0]	596
			2.87568	0.0149842	Transcription Factor Complex		3.Intra Cellular	3.Intra Cellular, 4.Nuclear Membrane	0.347744	3	6	ENSG00000110092	GENE-protein_coding,retained_intron	595	CCND1	CCND1		false	595	223.5	0	3	ASSOCIATED_NEW_GENE	1	0.994045	false	0	595	124742	0.510321	[F5H437, P24385, Q5MGB2, Q6FI00]	595
			2.87568	0.0149842	Transcription Factor Complex		0.Annotation definition not found in 'Homo Sapiens.properties' file	0.Annotation definition not found in 'Homo Sapiens.properties' file	0.347744	3	6	ENSG00000112242	GENE-protein_coding	1871	E2F3	E2F3		false	1871	223.5	0	3	ASSOCIATED_NEW_GENE	1	0.994045	false	0	1871	124742	0.510321	[A0A087X0B6, A0A3Q9JIX6, A0A3S9X9Y1, O00716, Q24JQ3, Q499G5]	1871
			2.49189	0.0937355			0.Annotation definition not found in 'Homo Sapiens.properties' file	0.Annotation definition not found in 'Homo Sapiens.properties' file	0.401302	3	4	ENSG00000142634	GENE-protein_coding	79180	EFHD2	EFHD2		false	79180	190	0	3	ASSOCIATED_NEW_GENE	0	0.995264	false	0	79180	199706	0.342391	[A0A024QZ77, A0A024QZ82, H0Y4Y4, Q96C19]	79180
			3.52703	0.0653732			3.Intra Cellular	3.Intra Cellular	0.283525	2	4	ENSG00000138443	GENE-nonsense_mediated_decay,processed_transcript,protein_coding,retained_intron	10152	ABI2	ABI2		false	10152	86	0	2	ASSOCIATED_NEW_GENE	0	0.991978	false	0	10152	193950	0.5	[A0A0A0MQU9, A0A0C4DG21, A0A7D9NKC8, B7Z836, E7EP65, E7EUA1, E7EW77, E9PEZ7, F8WAL6, F8WAQ3, F8WAU3, F8WAZ8, F8WBL5, F8WCD7, F8WEB9, H0Y6B5, H7C3Q7, Q9NYB9]	10152
			3.08919	0.0129288			1.Extracellular	1.Extracellular, 2.Plasma Membrane, 3.Intra Cellular	0.32371	2	6	ENSG00000184009	GENE-nonsense_mediated_decay,protein_coding,retained_intron	71	ACTG1	ACTG1		false	71	181.5	0	2	ASSOCIATED_NEW_GENE	0	0.993368	false	0	71	126454	0.505602	[A0A7P0TBL1, A0A804GS07, I3L1U9, I3L3I0, I3L3R2, I3L4N8, J3KT65, K7EM38, P63261, Q6PJ43, Q96FU6]	71
			3.20811	0			2.Plasma Membrane	2.Plasma Membrane, 3.Intra Cellular	0.31171	2	6	ENSG00000168646	GENE-protein_coding,retained_intron	8313	AXIN2	AXIN2		false	8313	315	0	2	ASSOCIATED_NEW_GENE	1	0.99299	false	0	8313	0	0	[A0A024R8J7, A0A024R8M3, A0A087WXP8, A0A1B0GX50, B7ZKL5, E7ES00, F5GX43, J3QQJ3, J3QRK4, Q9BRF5, Q9Y2T1]	8313
			2.87568	0.0149842			3.Intra Cellular	3.Intra Cellular, 5.Nucleus	0.347744	2	6	ENSG00000076108	GENE-processed_transcript,protein_coding,retained_intron	11176	BAZ2A	BAZ2A		false	11176	223.5	0	2	ASSOCIATED_NEW_GENE	0	0.994045	false	0	11176	124742	0.510321	[A0A0C4DGI9, F8VU39, F8VWQ3, F8W053, H0YHL2, H0YHQ7, H0YII3, J3KPG5, J3QK86, Q9UIF9]	11176
			2.87568	0.0149842			3.Intra Cellular	3.Intra Cellular	0.347744	2	6	ENSG00000089685	GENE-nonsense_mediated_decay,processed_transcript,protein_coding,retained_intron	332	BIRC5	BIRC5		false	332	223.5	0	2	ASSOCIATED_NEW_GENE	0	0.994045	false	0	332	124742	0.510321	[A0A0B4J1S3, A0A7L8XZM3, A3E0Z4, A3E0Z5, A3E0Z6, A3E0Z7, A3E0Z8, E7CU85, H3BLT4, K7ELG2, K7EMW2, K7EP76, O15392]	332
			2.76757	0.0177478			0.Annotation definition not found in 'Homo Sapiens.properties' file	0.Annotation definition not found in 'Homo Sapiens.properties' file	0.361328	2	4	ENSG00000134717	GENE-nonsense_mediated_decay,processed_transcript,protein_coding,retained_intron	91408	BTF3L4	BTF3L4		false	91408	231	0	2	ASSOCIATED_NEW_GENE	0	0.994389	false	0	91408	99666	0.509978	[E9PL10, E9PPC3, Q6PJ77, Q96K17]	91408
			3.76757	0			3.Intra Cellular	3.Intra Cellular	0.265423	2	6	ENSG00000132906	GENE-nonsense_mediated_decay,protein_coding,retained_intron	842	CASP9	CASP9		false	842	108	0	2	ASSOCIATED_NEW_GENE	1	0.991214	false	0	842	0	0	[A0A087WX72, F8VVS7, F8VWA5, H0Y3S8, H0Y6Y2, P55211, Q5JRU2, Q5JRU8]	842
			3.20811	0			3.Intra Cellular	3.Intra Cellular	0.31171	2	6	ENSG00000105810	GENE-processed_transcript,protein_coding,retained_intron	1021	CDK6	CDK6		false	1021	315	0	2	ASSOCIATED_NEW_GENE	1	0.99299	false	0	1021	0	0	[Q00534]	1021
			2.87568	0.0149842			3.Intra Cellular	3.Intra Cellular, 4.Nuclear Membrane	0.347744	2	6	ENSG00000172893	GENE-protein_coding,retained_intron	1717	DHCR7	DHCR7		false	1717	223.5	0	2	ASSOCIATED_NEW_GENE	0	0.994045	false	0	1717	124742	0.510321	[A0A024R5F7, A0A0S2Z3N8, A0A0S2Z3S3, A0A0S2Z3U5, A0A1Y1B909, A0A1Y1BBN3, A0A1Y1BG54, A0A804HI25, A0A804HJI8, A0A804HJQ7, A0A804HL56, E9PIP9, E9PJ54, E9PLZ2, E9PM00, E9PQ71, E9PRL8, H0YCS7, H0YE57, H0YEJ5, Q9UBM7, X5D9E1, X5DNI9, X5DRD7]	1717
			3.20811	0			1.Extracellular	1.Extracellular, 2.Plasma Membrane, 3.Intra Cellular	0.31171	2	6	ENSG00000198719	GENE-protein_coding	28514	DLL1	DLL1		false	28514	315	0	2	ASSOCIATED_NEW_GENE	1	0.99299	false	0	28514	0	0	[A0A0D9SF76, A0A384P5C6, O00548]	28514
			2.87568	0.0149842			0.Annotation definition not found in 'Homo Sapiens.properties' file	0.Annotation definition not found in 'Homo Sapiens.properties' file	0.347744	2	6	ENSG00000053254	GENE-nonsense_mediated_decay,processed_transcript,protein_coding	1112	FOXN3	FOXN3		false	1112	223.5	0	2	ASSOCIATED_NEW_GENE	0	0.994045	false	0	1112	124742	0.510321	[A0A024R6I1, G3V3A7, G3V4N5, G3V5C7, H0YJ22, H0YJ43, H0YJ54, H0YJ94, H0YJG3, H0YJY0, O00409]	1112
			2.76757	0.0177478			3.Intra Cellular	3.Intra Cellular	0.361328	2	4	ENSG00000138757	GENE-nonsense_mediated_decay,processed_transcript,protein_coding,retained_intron	9908	G3BP2	G3BP2		false	9908	231	0	2	ASSOCIATED_NEW_GENE	0	0.994389	false	0	9908	99666	0.509978	[A0A024RDB2, A0A024RDE5, A0A7I2V2R0, A0A7I2V382, A0A7I2V3E2, A0A7I2V3I4, A0A7I2V3P9, A0A7I2V3R7, A0A7I2V3Z6, A0A7I2V481, A0A7I2V513, A0A7I2V547, A0A7I2V572, A0A7I2V647, A0A7I2YQD9, A0A7I2YQG8, A0A7I2YQL7, A0A7I2YQS2, D6R9A4, D6RAC7, D6RB17, D6RBR0, D6RBW8, D6RE13, D6RGJ4, H0YAE3, Q9UN86]	9908
			2.76757	0.0177478			1.Extracellular	1.Extracellular, 3.Intra Cellular	0.361328	2	4	ENSG00000089597	GENE-nonsense_mediated_decay,processed_transcript,protein_coding,retained_intron	23193	GANAB	GANAB		false	23193	231	0	2	ASSOCIATED_NEW_GENE	0	0.994389	false	0	23193	99666	0.509978	[A0A024R592, B4DIW2, B4DSM6, B4DZ53, E9PKU7, E9PNH1, E9PQ69, F5H6X6, Q14697, Q9BS14, V9HWJ0]	23193
			2.76757	0.0177478			2.Plasma Membrane	2.Plasma Membrane, 3.Intra Cellular	0.361328	2	4	ENSG00000165219	GENE-nonsense_mediated_decay,processed_transcript,protein_coding,retained_intron	26130	GAPVD1	GAPVD1		false	26130	231	0	2	ASSOCIATED_NEW_GENE	0	0.994389	false	0	26130	99666	0.509978	[A0A024R862, A0A024R875, A0A024R8A2, A0A0A0MQV8, B0QZ65, B4DGD8, C9IZ08, C9IZX9, F8W9S7, H0Y4E7, H0Y7I9, Q14C86]	26130
			3.08919	0.0129288			0.Annotation definition not found in 'Homo Sapiens.properties' file	0.Annotation definition not found in 'Homo Sapiens.properties' file	0.32371	2	6	ENSG00000187837	GENE-protein_coding	3006	H1-2	H1-2		false	3006	181.5	0	2	ASSOCIATED_NEW_GENE	0	0.993368	false	0	3006	126454	0.505602	[P16403]	3006
			2.93243	0.0161432			1.Extracellular	1.Extracellular	0.341014	2	6	ENSG00000184260	GENE-protein_coding	8338	H2AC20	H2AC20		false	8338	211.5	0	2	ASSOCIATED_NEW_GENE	0	0.993865	false	0	8338	63006	0.507229	[Q16777]	8338
			2.93243	0.0161432			2.Plasma Membrane	2.Plasma Membrane, 3.Intra Cellular	0.341014	2	6	ENSG00000140443	GENE-nonsense_mediated_decay,processed_transcript,protein_coding,retained_intron	3480	IGF1R	IGF1R		false	3480	211.5	0	2	ASSOCIATED_NEW_GENE	0	0.993865	false	0	3480	63006	0.507229	[C9J5X1, H0YMJ5, H0YNR0, H3BSZ8, P08069, Q3B833]	3480
			3.20811	0			1.Extracellular	1.Extracellular, 2.Plasma Membrane	0.31171	2	6	ENSG00000101384	GENE-nonsense_mediated_decay,processed_transcript,protein_coding,retained_intron	182	JAG1	JAG1		false	182	315	0	2	ASSOCIATED_NEW_GENE	1	0.99299	false	0	182	0	0	[A0A087WXH5, A0A087X1E8, B5M914, B7U6M8, B7U6M9, P78504, Q4KMR2, Q99740]	182
			3.76757	0			2.Plasma Membrane	2.Plasma Membrane, 3.Intra Cellular	0.265423	2	6	ENSG00000055118	GENE-protein_coding,retained_intron	3757	KCNH2	KCNH2		false	3757	108	0	2	ASSOCIATED_NEW_GENE	1	0.991214	false	0	3757	0	0	[A0A090N7W1, A0A090N7X5, A0A090N8Q0, A0PJW5, A8WBZ2, C7DYB4, J9SM79, Q12809, Q15BH2, Q45QN5, Q6U279, Q6U283, Q6U287, Q75MK8, Q75MK9]	3757
			3.76757	0			2.Plasma Membrane	2.Plasma Membrane, 3.Intra Cellular	0.265423	2	6	ENSG00000053918	GENE-processed_transcript,protein_coding	3784	KCNQ1	KCNQ1		false	3784	108	0	2	ASSOCIATED_NEW_GENE	1	0.991214	false	0	3784	0	0	[A0A0J9YXF5, A0A2R8YDV1, A0A2R8YEQ9, A0FIK7, A0FIK8, E9PPZ0, F8W824, P51787, Q96AI9]	3784
			2.87568	0.0149842			1.Extracellular	1.Extracellular, 3.Intra Cellular	0.347744	2	6	ENSG00000134333	GENE-nonsense_mediated_decay,protein_coding,retained_intron	3939	LDHA	LDHA		false	3939	223.5	0	2	ASSOCIATED_NEW_GENE	0	0.994045	false	0	3939	124742	0.510321	[F5GWW2, F5GXC7, F5GXH2, F5GXU1, F5GXY2, F5GYU2, F5GZQ4, F5H5J4, F5H6W8, F5H8H6, P00338, V9HWB9]	3939
			2.87568	0.0149842			3.Intra Cellular	3.Intra Cellular	0.347744	2	6	ENSG00000066557	GENE-protein_coding	55631	LRRC40	LRRC40		false	55631	223.5	0	2	ASSOCIATED_NEW_GENE	0	0.994045	false	0	55631	124742	0.510321	[A0A140VJN3, Q9H9A6]	55631
			3.20811	0			2.Plasma Membrane	2.Plasma Membrane, 3.Intra Cellular	0.31171	2	6	ENSG00000169032	GENE-nonsense_mediated_decay,protein_coding,retained_intron	5604	MAP2K1	MAP2K1		false	5604	315	0	2	ASSOCIATED_NEW_GENE	1	0.99299	false	0	5604	0	0	[A4QPA9, B4DFY5, H3BRW9, Q02750]	5604
			3.08919	0.0129288			3.Intra Cellular	3.Intra Cellular, 5.Nucleus	0.32371	2	6	ENSG00000112118	GENE-processed_transcript,protein_coding	4172	MCM3	MCM3		false	4172	181.5	0	2	ASSOCIATED_NEW_GENE	0	0.993368	false	0	4172	126454	0.505602	[A0A0S2Z492, A0A0S2Z4T1, A0A499FHX9, B4DUQ9, J3KQ69, P25205, Q7Z6P5]	4172
			3.20811	0			1.Extracellular	1.Extracellular, 2.Plasma Membrane	0.31171	2	6	ENSG00000105976	GENE-processed_transcript,protein_coding	4233	MET	MET		false	4233	315	0	2	ASSOCIATED_NEW_GENE	1	0.99299	false	0	4233	0	0	[A0A024R728, A0A024R759, A0PJF7, B4DLF5, B5A929, B5A930, B5A931, B5A933, B5A934, B5A935, B5A936, B5A937, B5A938, B5A939, B5A940, B5A941, B5A942, B5A943, C9JKM5, E6Y365, H7C130, H7C174, P08581, Q14825, Q9UEJ3]	4233
			3.08919	0.0129288			3.Intra Cellular	3.Intra Cellular	0.32371	2	6	ENSG00000116688	GENE-nonsense_mediated_decay,processed_transcript,protein_coding,retained_intron	9927	MFN2	MFN2		false	9927	181.5	0	2	ASSOCIATED_NEW_GENE	0	0.993368	false	0	9927	126454	0.505602	[A0A6Q8PFJ4, A0A6Q8PFT5, A0A6Q8PGA3, A0A6Q8PGR2, A0A6Q8PGS9, A0A6Q8PGV8, A0A6Q8PH07, O95140, Q5JXC5]	9927
			2.76757	0.0177478			2.Plasma Membrane	2.Plasma Membrane, 3.Intra Cellular, 4.Nuclear Membrane, 5.Nucleus	0.361328	2	4	ENSG00000147649	GENE-nonsense_mediated_decay,protein_coding,retained_intron	92140	MTDH	MTDH		false	92140	231	0	2	ASSOCIATED_NEW_GENE	0	0.994389	false	0	92140	99666	0.509978	[A0A024R9D2, E5RJU9, H0YB56, H0YBE0, H0YBJ8, Q86UE4]	92140
			3.20811	0	Transcription Factor Complex		3.Intra Cellular	3.Intra Cellular	0.31171	2	6	ENSG00000118513	GENE-nonsense_mediated_decay,processed_transcript,protein_coding	4602	MYB	MYB		false	4602	315	0	2	ASSOCIATED_NEW_GENE	1	0.99299	false	0	4602	0	0	[A0A087WTI6, A0A0C4DG19, E9PIW4, E9PJ96, E9PJF1, E9PJT2, E9PKZ3, E9PLN0, E9PMQ0, E9PMZ0, E9PN43, E9PN92, E9PNH6, E9PP87, E9PPL8, E9PPR4, E9PQQ2, F8W8G5, H0YCN6, P10242, Q708E1, Q708E3, Q708E5, Q708E6, Q708E8, Q708E9]	4602
			3.20811	0			5.Nucleus	5.Nucleus	0.31171	2	6	ENSG00000134323	GENE-protein_coding	4613	MYCN	MYCN		false	4613	315	0	2	ASSOCIATED_NEW_GENE	1	0.99299	false	0	4613	0	0	[A0A1W2PPD9, A0A5P8TXN7, L8E744, P04198, Q9H224]	4613
			3.20811	0			1.Extracellular	1.Extracellular, 2.Plasma Membrane, 3.Intra Cellular	0.31171	2	6	ENSG00000148400	GENE-nonsense_mediated_decay,protein_coding,retained_intron	4851	NOTCH1	NOTCH1		false	4851	315	0	2	ASSOCIATED_NEW_GENE	1	0.99299	false	0	4851	0	0	[A0A7P0T8U6, A0A7P0T8W1, A0A7P0T9V1, A0A7P0TA56, A0A7P0TAK8, A0A7P0TB20, A0A7P0TBG2, A0A7P0Z4H9, A7TW83, H6VYP0, H6VYP1, H9BDU9, H9CXX2, L8EAX5, P46531, Q6IAD4, W6FHB5]	4851
			3.20811	0			1.Extracellular	1.Extracellular, 2.Plasma Membrane, 3.Intra Cellular	0.31171	2	6	ENSG00000134250	GENE-nonsense_mediated_decay,processed_transcript,protein_coding,retained_intron	4853	NOTCH2	NOTCH2		false	4853	315	0	2	ASSOCIATED_NEW_GENE	1	0.99299	false	0	4853	0	0	[A0A1W2PQQ5, A0A494C049, A0A494C1F1, A0A494C1H8, A0A494C1U9, D2WEZ3, Q04721, Q6IQ50, Q9UFD5, R4GN02]	4853
			2.76757	0.0177478			3.Intra Cellular	3.Intra Cellular, 5.Nucleus	0.361328	2	4	ENSG00000069275	GENE-processed_transcript,protein_coding	64710	NUCKS1	NUCKS1		false	64710	231	0	2	ASSOCIATED_NEW_GENE	0	0.994389	false	0	64710	99666	0.509978	[Q9H1E3]	64710
			3.76757	0			1.Extracellular	1.Extracellular, 3.Intra Cellular	0.265423	2	6	ENSG00000067225	GENE-nonsense_mediated_decay,protein_coding,retained_intron	5315	PKM	PKM		false	5315	108	0	2	ASSOCIATED_NEW_GENE	1	0.991214	false	0	5315	0	0	[A0A024R5Z9, A0A804F6T5, A0A804F729, B4DNK4, H3BN34, H3BQ34, H3BQZ3, H3BR70, H3BT25, H3BTJ2, H3BTN5, H3BU13, H3BUW1, P14618, V9HWB8]	5315
			3.24595	0.0183224			1.Extracellular	1.Extracellular, 3.Intra Cellular	0.308077	2	4	ENSG00000152952	GENE-nonsense_mediated_decay,protein_coding,retained_intron	5352	PLOD2	PLOD2		false	5352	139.5	0	2	ASSOCIATED_NEW_GENE	0	0.99287	false	0	5352	53312	0.505474	[C9JXZ0, E7ETU9, F8WEW3, O00469, Q96AR9, Q96QU5]	5352
			3.24595	0.0183224			3.Intra Cellular	3.Intra Cellular	0.308077	2	4	ENSG00000265241	GENE-protein_coding,retained_intron	9939	RBM8A	RBM8A		false	9939	139.5	0	2	ASSOCIATED_NEW_GENE	0	0.99287	false	0	9939	53312	0.505474	[A0A023T787, A0A060D9J6, A0A0J9YW13, L8E9A7, Q9Y5S9]	9939
			3.41081	0.045381			3.Intra Cellular	3.Intra Cellular	0.293185	2	6	ENSG00000163961	GENE-nonsense_mediated_decay,protein_coding	165918	RNF168	RNF168		false	165918	120	0	2	ASSOCIATED_NEW_GENE	0	0.992347	false	0	165918	38276	0.5	[F8WD60, Q8IYW5]	165918
			3.24595	0.0183224			3.Intra Cellular	3.Intra Cellular, 5.Nucleus	0.308077	2	4	ENSG00000146223	GENE-nonsense_mediated_decay,processed_transcript,protein_coding,retained_intron	285855	RPL7L1	RPL7L1		false	285855	139.5	0	2	ASSOCIATED_NEW_GENE	0	0.99287	false	0	285855	53312	0.505474	[A0A024RD36, A0A1W2PQ76, Q6DKI1, R4GMU7]	285855
			3.08919	0.0129288			1.Extracellular	1.Extracellular, 3.Intra Cellular, 5.Nucleus	0.32371	2	6	ENSG00000140988	GENE-nonsense_mediated_decay,protein_coding,retained_intron	6187	RPS2	RPS2		false	6187	181.5	0	2	ASSOCIATED_NEW_GENE	0	0.993368	false	0	6187	126454	0.505602	[D3DU83, E9PM36, E9PMM9, E9PPT0, E9PQD7, H0YE27, H0YEN5, H3BNG3, I3L404, P15880, Q3KQT6, Q6IPX5, Q8N5L9, Q9BSW5]	6187
			2.87568	0.0149842			3.Intra Cellular	3.Intra Cellular	0.347744	2	6	ENSG00000171848	GENE-nonsense_mediated_decay,processed_transcript,protein_coding,retained_intron	6241	RRM2	RRM2		false	6241	223.5	0	2	ASSOCIATED_NEW_GENE	0	0.994045	false	0	6241	124742	0.510321	[A0A286YFD6, A0A2R8Y837, A0A7P0SBL1, P31350]	6241
			2.93243	0.0161432			3.Intra Cellular	3.Intra Cellular, 4.Nuclear Membrane	0.341014	2	6	ENSG00000079387	GENE-nonsense_mediated_decay,processed_transcript,protein_coding,retained_intron	29843	SENP1	SENP1		false	29843	211.5	0	2	ASSOCIATED_NEW_GENE	0	0.993865	false	0	29843	63006	0.507229	[F8VRZ8, F8W0I8, Q6N001, Q7Z3G1, Q9P0U3]	29843
			2.93243	0.0161432			3.Intra Cellular	3.Intra Cellular	0.341014	2	6	ENSG00000130766	GENE-protein_coding	83667	SESN2	SESN2		false	83667	211.5	0	2	ASSOCIATED_NEW_GENE	0	0.993865	false	0	83667	63006	0.507229	[P58004]	83667
			3.20811	0			3.Intra Cellular	3.Intra Cellular, 4.Nuclear Membrane, 5.Nucleus	0.31171	2	6	ENSG00000096717	GENE-processed_transcript,protein_coding	23411	SIRT1	SIRT1		false	23411	315	0	2	ASSOCIATED_NEW_GENE	1	0.99299	false	0	23411	0	0	[A0A024QZQ1, A8K128, B0QZ35, E9PC49, I1Y8W7, Q96EB6]	23411
			5.45946	0			1.Extracellular	1.Extracellular, 2.Plasma Membrane	0.183168	2	6	ENSG00000178235	GENE-protein_coding	114798	SLITRK1	SLITRK1		false	114798	25	0	2	ASSOCIATED_NEW_GENE	1	0.985843	false	0	114798	0	0	[Q96PX8]	114798
			3.63784	0.0164335	Transcription Factor Complex		3.Intra Cellular	3.Intra Cellular	0.274889	2	6	ENSG00000185591	GENE-protein_coding	6667	SP1	SP1		false	6667	78	0	2	ASSOCIATED_NEW_GENE	0	0.991626	false	0	6667	20208	0.5	[B2R4Y6, H3BUU5, H3BVI2, L8E7F4, P08047, Q15403]	6667
			2.76757	0.0177478			3.Intra Cellular	3.Intra Cellular, 5.Nucleus	0.361328	2	4	ENSG00000101972	GENE-nonsense_mediated_decay,processed_transcript,protein_coding,retained_intron	10735	STAG2	STAG2		false	10735	231	0	2	ASSOCIATED_NEW_GENE	0	0.994389	false	0	10735	99666	0.509978	[B1AMS8, B1AMS9, B1AMT0, B1AMT1, B1AMT2, B1AMT3, B1AMT4, E7ERE6, Q6AI02, Q6MZM3, Q6MZP3, Q8N3U4]	10735
			2.76757	0.0177478			1.Extracellular	1.Extracellular, 2.Plasma Membrane, 3.Intra Cellular	0.361328	2	4	ENSG00000072274	GENE-nonsense_mediated_decay,processed_transcript,protein_coding,retained_intron	7037	TFRC	TFRC		false	7037	231	0	2	ASSOCIATED_NEW_GENE	0	0.994389	false	0	7037	99666	0.509978	[A8K6Q8, B7Z2I6, F8WBE5, G3V0E5, H7C3V5, P02786, Q7Z3E0]	7037
			3.46486	0.0270167			2.Plasma Membrane	2.Plasma Membrane, 3.Intra Cellular	0.288612	2	4	ENSG00000112697	GENE-nonsense_mediated_decay,protein_coding	55754	TMEM30A	TMEM30A		false	55754	97.5	0	2	ASSOCIATED_NEW_GENE	0	0.992175	false	0	55754	56058	0.5	[A0A669KB92, A0A669KBA0, A0A669KBE6, A0A669KBF5, E5RG19, Q9NV96]	55754
			2.93243	0.0161432			2.Plasma Membrane	2.Plasma Membrane, 3.Intra Cellular	0.341014	2	6	ENSG00000140416	GENE-nonsense_mediated_decay,processed_transcript,protein_coding,retained_intron	7168	TPM1	TPM1		false	7168	211.5	0	2	ASSOCIATED_NEW_GENE	0	0.993865	false	0	7168	63006	0.507229	[A0A024R5W6, A0A087WTJ7, A0A0K0K1I0, A0A0S2Z4G6, A0A494BZZ2, A0A494C0I0, A0A494C0V8, B7Z596, B7Z722, D9YZV4, D9YZV5, D9YZV7, F5H7S3, H0YK48, H0YKJ4, H0YKP3, H0YKX5, H0YL42, H0YL80, H0YLS7, H0YN06, H7BYY1, O15513, P09493, Q6ZN40, Q8TCG4]	7168
			2.93243	0.0161432			3.Intra Cellular	3.Intra Cellular	0.341014	2	6	ENSG00000126261	GENE-nonsense_mediated_decay,processed_transcript,protein_coding,retained_intron	10054	UBA2	UBA2		false	10054	211.5	0	2	ASSOCIATED_NEW_GENE	0	0.993865	false	0	10054	63006	0.507229	[K7EPL2, K7ES38, K7ESK7, Q9UBT2, U3KQ55, U3KQ93]	10054
			2.87568	0.0149842			1.Extracellular	1.Extracellular, 2.Plasma Membrane, 3.Intra Cellular	0.347744	2	6	ENSG00000158195	GENE-protein_coding	10163	WASF2	WASF2		false	10163	223.5	0	2	ASSOCIATED_NEW_GENE	0	0.994045	false	0	10163	124742	0.510321	[Q05BU7, Q9Y6W5]	10163
			3.20811	0			1.Extracellular	1.Extracellular, 2.Plasma Membrane, 3.Intra Cellular	0.31171	2	6	ENSG00000125084	GENE-protein_coding	7471	WNT1	WNT1		false	7471	315	0	2	ASSOCIATED_NEW_GENE	1	0.99299	false	0	7471	0	0	[A0A087WXR9, P04628]	7471
			3.24595	0.0183224			3.Intra Cellular	3.Intra Cellular	0.308077	2	4	ENSG00000163848	GENE-processed_transcript,protein_coding	7707	ZNF148	ZNF148		false	7707	139.5	0	2	ASSOCIATED_NEW_GENE	0	0.99287	false	0	7707	53312	0.505474	[C9J6Y6, C9JRX0, C9K0U4, G5E9X2, Q12900, Q4FD37, Q8IWK7, Q9UQR1]	7707
			3.20811	0			0.Annotation definition not found in 'Homo Sapiens.properties' file	0.Annotation definition not found in 'Homo Sapiens.properties' file	0.31171	1	6			23044	23044	23044		false	23044	315	0	1	ASSOCIATED_NEW_GENE	0	0.99299	false	0	23044	0	0		23044
			3.20811	0			0.Annotation definition not found in 'Homo Sapiens.properties' file	0.Annotation definition not found in 'Homo Sapiens.properties' file	0.31171	1	6			25765	25765	25765		false	25765	315	0	1	ASSOCIATED_NEW_GENE	0	0.99299	false	0	25765	0	0		25765
			3.20811	0			3.Intra Cellular	3.Intra Cellular	0.31171	1	6	ENSG00000092847	GENE-nonsense_mediated_decay,protein_coding	26523	AGO1	AGO1		false	26523	315	0	1	ASSOCIATED_NEW_GENE	0	0.99299	false	0	26523	0	0	[A0A0U1RQZ8, A0A6I8PTZ8, B2RAD8, B3KME0, Q5TA58, Q9UL18]	26523
			3.76757	0			0.Annotation definition not found in 'Homo Sapiens.properties' file	0.Annotation definition not found in 'Homo Sapiens.properties' file	0.265423	1	6			554045	554045	554045		false	554045	108	0	1	ASSOCIATED_NEW_GENE	0	0.991214	false	0	554045	0	0		554045
			3.76757	0			0.Annotation definition not found in 'Homo Sapiens.properties' file	0.Annotation definition not found in 'Homo Sapiens.properties' file	0.265423	1	6			645840	645840	645840		false	645840	108	0	1	ASSOCIATED_NEW_GENE	0	0.991214	false	0	645840	0	0		645840
			3.76757	0			0.Annotation definition not found in 'Homo Sapiens.properties' file	0.Annotation definition not found in 'Homo Sapiens.properties' file	0.265423	1	6			100128295	100128295	100128295		false	100128295	108	0	1	ASSOCIATED_NEW_GENE	0	0.991214	false	0	100128295	0	0		100128295
			3.59459	0			2.Plasma Membrane	2.Plasma Membrane, 3.Intra Cellular	0.278195	1	4	ENSG00000006071	GENE-nonsense_mediated_decay,processed_transcript,protein_coding,retained_intron	6833	ABCC8	ABCC8		false	6833	147	0	1	ASSOCIATED_NEW_GENE	0	0.991763	false	0	6833	0	0	[A0A220SZZ5, A0A2R8Y3M7, A0A2R8Y475, A0A2R8Y4V0, A0A2R8Y4Z4, A0A2R8Y5D8, A0A2R8Y5I7, A0A2R8Y5V4, A0A2R8Y5X1, A0A2R8Y605, A0A2R8Y698, A0A2R8Y6B7, A0A2R8Y6I7, A0A2R8Y6Q0, A0A2R8Y775, A0A2R8Y781, A0A2R8Y7I1, A0A2R8YCG4, A0A2R8YD94, A0A2R8YDB5, A0A2R8YDE9, A0A2R8YDG0, A0A2R8YDG6, A0A2R8YDX3, A0A2R8YEE5, A0A2R8YFB3, A0A2R8YFU3, A0A2R8YG67, A0A2R8YGQ6, A0A2R8YHG6, A0A804HI74, A0A804HJG5, A0A804HJH4, A0…	6833
			3.59459	0			3.Intra Cellular	3.Intra Cellular	0.278195	1	4	ENSG00000144827	GENE-nonsense_mediated_decay,protein_coding,retained_intron	55347	ABHD10	ABHD10		false	55347	147	0	1	ASSOCIATED_NEW_GENE	0	0.991763	false	0	55347	0	0	[F8WBJ5, F8WBQ6, Q9NUJ1]	55347
			3.76757	0			1.Extracellular	1.Extracellular	0.265423	1	6	ENSG00000164074	GENE-nonsense_mediated_decay,protein_coding	80167	ABHD18	ABHD18		false	80167	108	0	1	ASSOCIATED_NEW_GENE	0	0.991214	false	0	80167	0	0	[A0A2R8YEZ0, B7WP89, D6RD85, D6RGX5, Q0P651]	80167
			3.20811	0			3.Intra Cellular	3.Intra Cellular	0.31171	1	6	ENSG00000099204	GENE-processed_transcript,protein_coding,retained_intron	3983	ABLIM1	ABLIM1		false	3983	315	0	1	ASSOCIATED_NEW_GENE	0	0.99299	false	0	3983	0	0	[A0A0A0MRL6, A0A3B3IS55, A0A494C1G0, A0A494C1P1, B3KSG3, B4DQA3, F6XFR5, F8W8M4, H0Y7N6, J3QSX6, O14639]	3983
			3.81622	0			3.Intra Cellular	3.Intra Cellular	0.26204	1	6	ENSG00000076555	GENE-nonsense_mediated_decay,processed_transcript,protein_coding,retained_intron	32	ACACB	ACACB		false	32	132	0	1	ASSOCIATED_NEW_GENE	0	0.99106	false	0	32	0	0	[A0A087WUA1, F5H5C3, F8W8T8, H0YGH5, O00763, Q4G170, S4R3S7]	32
			3.59459	0			3.Intra Cellular	3.Intra Cellular	0.278195	1	4	ENSG00000123130	GENE-nonsense_mediated_decay,protein_coding,retained_intron	23597	ACOT9	ACOT9		false	23597	147	0	1	ASSOCIATED_NEW_GENE	0	0.991763	false	0	23597	0	0	[C9J7L8, F8WDI2, H7C5Q2, Q96EA2, Q9Y305]	23597
			3.20811	0			2.Plasma Membrane	2.Plasma Membrane, 3.Intra Cellular	0.31171	1	6	ENSG00000151726	GENE-nonsense_mediated_decay,protein_coding,retained_intron	2180	ACSL1	ACSL1		false	2180	315	0	1	ASSOCIATED_NEW_GENE	0	0.99299	false	0	2180	0	0	[A8K9T3, B4E0R0, B7Z3Z9, D6RER0, D6RG07, E7EPM6, H0Y9U7, H0Y9Z9, P33121, Q108N1, Q108N2]	2180
			3.20811	0			1.Extracellular	1.Extracellular, 2.Plasma Membrane, 3.Intra Cellular	0.31171	1	6	ENSG00000068366	GENE-nonsense_mediated_decay,processed_transcript,protein_coding,retained_intron	2182	ACSL4	ACSL4		false	2182	315	0	1	ASSOCIATED_NEW_GENE	0	0.99299	false	0	2182	0	0	[A0A804HI36, D6RDA8, D6RF95, H0Y9A0, O60488, Q8TAF6]	2182
			3.20811	0			2.Plasma Membrane	2.Plasma Membrane, 3.Intra Cellular	0.31171	1	6	ENSG00000164398	GENE-nonsense_mediated_decay,processed_transcript,protein_coding,retained_intron	23305	ACSL6	ACSL6		false	23305	315	0	1	ASSOCIATED_NEW_GENE	0	0.99299	false	0	23305	0	0	[A0A494BZW8, A0A494C005, A0A494C046, A0A494C0A5, A0A494C0B6, A0A494C0D5, A0A494C0J9, A0A494C0V0, A0A494C1I9, A0A499FJL5, B2RB13, B4DFW3, C9J3Z0, C9J4I1, C9J8C7, C9JK59, C9JPA5, C9JT10, D3DQ84, E7ERD7, Q9UKU0]	23305
			4.24865	0			1.Extracellular	1.Extracellular, 3.Intra Cellular	0.235369	1	6	ENSG00000115073	GENE-protein_coding,retained_intron	10120	ACTR1B	ACTR1B		false	10120	48	0	1	ASSOCIATED_NEW_GENE	0	0.989687	false	0	10120	0	0	[P42025]	10120
			3.20811	0			3.Intra Cellular	3.Intra Cellular, 5.Nucleus	0.31171	1	6	ENSG00000197381	GENE-nonsense_mediated_decay,processed_transcript,protein_coding	104	ADARB1	ADARB1		false	104	315	0	1	ASSOCIATED_NEW_GENE	0	0.99299	false	0	104	0	0	[A0A0A0MSG8, P78563]	104
			3.59459	0			2.Plasma Membrane	2.Plasma Membrane, 3.Intra Cellular	0.278195	1	4	ENSG00000078549	GENE-protein_coding	117	ADCYAP1R1	ADCYAP1R1		false	117	147	0	1	ASSOCIATED_NEW_GENE	0	0.991763	false	0	117	0	0	[A0A090N8F8, C9JVH3, E9PFU5, H0Y813, P41586, Q6RKA2, Q6RKA3, Q6S991, Q6S992]	117
			3.20811	0	Transcription Factor Complex		1.Extracellular	1.Extracellular, 3.Intra Cellular	0.31171	1	6	ENSG00000101126	GENE-processed_transcript,protein_coding	23394	ADNP	ADNP		false	23394	315	0	1	ASSOCIATED_NEW_GENE	0	0.99299	false	0	23394	0	0	[A0A2R8Y6X0, A0A2R8YCL6, A0A669KBJ7, Q6DHZ8, Q9H2P0]	23394
			3.81622	0			5.Nucleus	5.Nucleus	0.26204	1	6	ENSG00000072364	GENE-processed_transcript,protein_coding,retained_intron	27125	AFF4	AFF4		false	27125	132	0	1	ASSOCIATED_NEW_GENE	0	0.99106	false	0	27125	0	0	[C9JCE0, H7C319, L8E815, Q8TAX5, Q9UHB7]	27125
			4.24865	0			1.Extracellular	1.Extracellular, 3.Intra Cellular	0.235369	1	6	ENSG00000100591	GENE-nonsense_mediated_decay,processed_transcript,protein_coding,retained_intron	10598	AHSA1	AHSA1		false	10598	48	0	1	ASSOCIATED_NEW_GENE	0	0.989687	false	0	10598	0	0	[G3V3W9, G3V438, H0YJ63, H0YJG7, H0YJU2, O95433]	10598
			3.20811	0			1.Extracellular	1.Extracellular, 2.Plasma Membrane, 3.Intra Cellular	0.31171	1	6	ENSG00000117448	GENE-processed_transcript,protein_coding	10327	AKR1A1	AKR1A1		false	10327	315	0	1	ASSOCIATED_NEW_GENE	0	0.99299	false	0	10327	0	0	[P14550, Q5T621, V9GYG2, V9GYP9, V9HWI0]	10327
			3.20811	0			1.Extracellular	1.Extracellular, 2.Plasma Membrane, 3.Intra Cellular	0.31171	1	6	ENSG00000085662	GENE-nonsense_mediated_decay,processed_transcript,protein_coding,retained_intron	231	AKR1B1	AKR1B1		false	231	315	0	1	ASSOCIATED_NEW_GENE	0	0.99299	false	0	231	0	0	[A0A024R7A8, E9PCX2, E9PEF9, P15121]	231
			3.20811	0			1.Extracellular	1.Extracellular, 3.Intra Cellular	0.31171	1	6	ENSG00000211454	GENE-polymorphic_pseudogene,retained_intron	246181	AKR7L	AKR7L		false	246181	315	0	1	ASSOCIATED_NEW_GENE	0	0.99299	false	0	246181	0	0	[A0A499FJT0, Q8NHP1]	246181
			4.24865	0			3.Intra Cellular	3.Intra Cellular	0.235369	1	6	ENSG00000137124	GENE-protein_coding	219	ALDH1B1	ALDH1B1		false	219	48	0	1	ASSOCIATED_NEW_GENE	0	0.989687	false	0	219	0	0	[A0A0U1RQK9, A0A384MTJ7, P30837]	219
			3.20811	0			1.Extracellular	1.Extracellular, 3.Intra Cellular	0.31171	1	6	ENSG00000143149	GENE-processed_transcript,protein_coding,retained_intron	223	ALDH9A1	ALDH9A1		false	223	315	0	1	ASSOCIATED_NEW_GENE	0	0.99299	false	0	223	0	0	[P49189]	223
			3.76757	0			1.Extracellular	1.Extracellular, 3.Intra Cellular	0.265423	1	6	ENSG00000109107	GENE-protein_coding,retained_intron	230	ALDOC	ALDOC		false	230	108	0	1	ASSOCIATED_NEW_GENE	0	0.991214	false	0	230	0	0	[A0A024QZ64, A8MVZ9, C9J8F3, J3KSV6, J3QKK1, J3QKP5, K7EKH5, P09972]	230
			3.76757	0			1.Extracellular	1.Extracellular	0.265423	1	6	ENSG00000101280	GENE-protein_coding	51378	ANGPT4	ANGPT4		false	51378	108	0	1	ASSOCIATED_NEW_GENE	0	0.991214	false	0	51378	0	0	[Q9Y264]	51378
			3.76757	0	Transcription Factor Complex		1.Extracellular	1.Extracellular, 2.Plasma Membrane, 3.Intra Cellular	0.265423	1	6	ENSG00000182718	GENE-nonsense_mediated_decay,processed_transcript,protein_coding,retained_intron	302	ANXA2	ANXA2		false	302	108	0	1	ASSOCIATED_NEW_GENE	0	0.991214	false	0	302	0	0	[A0A024R5Z7, A0A7I2V4P4, H0YKL9, H0YKN4, H0YKS4, H0YKV8, H0YKX9, H0YKZ7, H0YL33, H0YLE2, H0YLV6, H0YM50, H0YMD0, H0YMD9, H0YMM1, H0YMT9, H0YMU9, H0YMW4, H0YN28, H0YN42, H0YNA0, H0YNB8, H0YNP5, P07355]	302
			3.20811	0			1.Extracellular	1.Extracellular, 2.Plasma Membrane, 3.Intra Cellular, 4.Nuclear Membrane	0.31171	1	6	ENSG00000196975	GENE-nonsense_mediated_decay,processed_transcript,protein_coding,retained_intron	307	ANXA4	ANXA4		false	307	315	0	1	ASSOCIATED_NEW_GENE	0	0.99299	false	0	307	0	0	[A0A0U1RRE7, A0A1Y8EKW3, B4E1S2, P09525, Q6P452]	307
			3.20811	0			2.Plasma Membrane	2.Plasma Membrane, 3.Intra Cellular	0.31171	1	6	ENSG00000196961	GENE-nonsense_mediated_decay,processed_transcript,protein_coding,retained_intron	160	AP2A1	AP2A1		false	160	315	0	1	ASSOCIATED_NEW_GENE	0	0.99299	false	0	160	0	0	[M0R2D9, O95782]	160
			3.20811	0			2.Plasma Membrane	2.Plasma Membrane, 3.Intra Cellular	0.31171	1	6	ENSG00000183020	GENE-nonsense_mediated_decay,processed_transcript,protein_coding,retained_intron	161	AP2A2	AP2A2		false	161	315	0	1	ASSOCIATED_NEW_GENE	0	0.99299	false	0	161	0	0	[A0A0G2JQA4, A0A0G2JQM1, A0A0G2JQT9, A0A0G2JRF9, A0A0G2JRS3, A0A0G2JS17, A0A0G2JS82, E9PNC4, E9PPY8, E9PPZ3, E9PQP4, E9PR62, E9PS94, H0YDE9, H0YEG0, O94973]	161
			3.20811	0			2.Plasma Membrane	2.Plasma Membrane, 3.Intra Cellular	0.31171	1	6	ENSG00000006125	GENE-nonsense_mediated_decay,processed_transcript,protein_coding	163	AP2B1	AP2B1		false	163	315	0	1	ASSOCIATED_NEW_GENE	0	0.99299	false	0	163	0	0	[A0A087WU93, A0A087WXS3, A0A087WYD1, A0A087WZQ6, A0A087X253, A0A140VJE8, H0UID3, H0UID4, H0UID5, K7EJ01, K7EJX1, K7EKZ5, K7EMN7, K7EN71, K7ERB2, P63010, Q96EL6]	163
			3.20811	0			1.Extracellular	1.Extracellular, 2.Plasma Membrane, 3.Intra Cellular	0.31171	1	6	ENSG00000161203	GENE-nonsense_mediated_decay,processed_transcript,protein_coding,retained_intron	1173	AP2M1	AP2M1		false	1173	315	0	1	ASSOCIATED_NEW_GENE	0	0.99299	false	0	1173	0	0	[A0A087WY71, B4DNB9, C9JGT8, C9JJ47, C9JJD3, C9JPV8, C9JTK4, E9PFW3, H7C4C3, Q96CW1]	1173
			3.81622	0			3.Intra Cellular	3.Intra Cellular	0.26204	1	6	ENSG00000065000	GENE-nonsense_mediated_decay,processed_transcript,protein_coding,retained_intron	8943	AP3D1	AP3D1		false	8943	132	0	1	ASSOCIATED_NEW_GENE	0	0.99106	false	0	8943	0	0	[A0A087WYN6, A0A2R8Y4J3, A0A2R8Y611, A0A2R8YCY8, K7ELX8, K7ERW8, O14617, Q6PK82]	8943
			3.20811	0			1.Extracellular	1.Extracellular, 3.Intra Cellular, 4.Nuclear Membrane	0.31171	1	6	ENSG00000164062	GENE-nonsense_mediated_decay,protein_coding,retained_intron	327	APEH	APEH		false	327	315	0	1	ASSOCIATED_NEW_GENE	0	0.99299	false	0	327	0	0	[C9JIF9, C9JLK2, F8WBC4, F8WEH5, H0YFE5, H7C1U0, H7C273, H7C393, P13798]	327
			3.20811	0			1.Extracellular	1.Extracellular, 3.Intra Cellular	0.31171	1	6	ENSG00000128335	GENE-processed_transcript,protein_coding	23780	APOL2	APOL2		false	23780	315	0	1	ASSOCIATED_NEW_GENE	0	0.99299	false	0	23780	0	0	[A0A024R1M8, B0QYK8, E9PM95, J3KQL8, Q9BQE5]	23780
			3.76757	0			1.Extracellular	1.Extracellular, 3.Intra Cellular	0.265423	1	6	ENSG00000221963	GENE-protein_coding	80830	APOL6	APOL6		false	80830	108	0	1	ASSOCIATED_NEW_GENE	0	0.991214	false	0	80830	0	0	[B3KTP4, Q9BWW8]	80830
			3.20811	0			2.Plasma Membrane	2.Plasma Membrane, 3.Intra Cellular	0.31171	1	6	ENSG00000169083	GENE-nonsense_mediated_decay,processed_transcript,protein_coding	367	AR	AR		false	367	315	0	1	ASSOCIATED_NEW_GENE	0	0.99299	false	0	367	0	0	[A0A087WUX9, A0A087X1B6, A0A3G2C3P2, A0A6H0MAB3, A0A6H0MAE6, A0A7I2PS51, C0JKD5, C0JKD6, C0JKD7, D2KF13, D2Y6K2, D3YPP9, D3YPQ0, D3YPQ1, D3YPQ2, D3YPQ3, D5M8Q2, E9PEG3, F1D8N5, F5GZG9, G4VV16, P10275, Q13771, Q9NUA2, Q9UKJ6, V9GZH8, V9TLK5, X5DNC5]	367
			3.20811	0			1.Extracellular	1.Extracellular, 2.Plasma Membrane, 3.Intra Cellular	0.31171	1	6	ENSG00000109321	GENE-protein_coding,retained_intron	374	AREG	AREG		false	374	315	0	1	ASSOCIATED_NEW_GENE	0	0.99299	false	0	374	0	0	[D6RFX5, P15514]	374
			3.20811	0			1.Extracellular	1.Extracellular, 2.Plasma Membrane, 3.Intra Cellular	0.31171	1	6	ENSG00000165527	GENE-protein_coding	382	ARF6	ARF6		false	382	315	0	1	ASSOCIATED_NEW_GENE	0	0.99299	false	0	382	0	0	[P62330, Q6FH17]	382
			3.20811	0			1.Extracellular	1.Extracellular, 3.Intra Cellular	0.31171	1	6	ENSG00000175220	GENE-protein_coding,retained_intron	392	ARHGAP1	ARHGAP1		false	392	315	0	1	ASSOCIATED_NEW_GENE	0	0.99299	false	0	392	0	0	[E9PNR6, H0YE29, Q07960]	392
			3.20811	0			1.Extracellular	1.Extracellular, 3.Intra Cellular	0.31171	1	6	ENSG00000111348	GENE-processed_transcript,protein_coding,retained_intron	397	ARHGDIB	ARHGDIB		false	397	315	0	1	ASSOCIATED_NEW_GENE	0	0.99299	false	0	397	0	0	[A0A024RAS5, F5H2R5, F5H3P3, F5H6Q0, H0YGX7, P52566]	397
			3.81622	0			3.Intra Cellular	3.Intra Cellular	0.26204	1	6	ENSG00000166233	GENE-nonsense_mediated_decay,processed_transcript,protein_coding,retained_intron	25820	ARIH1	ARIH1		false	25820	132	0	1	ASSOCIATED_NEW_GENE	0	0.99106	false	0	25820	0	0	[A0A087WT96, H3BNB9, H3BSK4, H3BUS0, Q9Y4X5]	25820
			3.76757	0			3.Intra Cellular	3.Intra Cellular	0.265423	1	6	ENSG00000170540	GENE-nonsense_mediated_decay,protein_coding,retained_intron	23204	ARL6IP1	ARL6IP1		false	23204	108	0	1	ASSOCIATED_NEW_GENE	0	0.991214	false	0	23204	0	0	[A0A024QYV7, H3BPJ2, H3BS91, H3BTX6, Q15041]	23204
			3.76757	0			1.Extracellular	1.Extracellular, 3.Intra Cellular	0.265423	1	6	ENSG00000162704	GENE-processed_transcript,protein_coding,retained_intron	10092	ARPC5	ARPC5		false	10092	108	0	1	ASSOCIATED_NEW_GENE	0	0.991214	false	0	10092	0	0	[B1ALC0, O15511, Q6IPM3]	10092
			3.59459	0			2.Plasma Membrane	2.Plasma Membrane, 3.Intra Cellular	0.278195	1	4	ENSG00000153317	GENE-nonsense_mediated_decay,processed_transcript,protein_coding,retained_intron	50807	ASAP1	ASAP1		false	50807	147	0	1	ASSOCIATED_NEW_GENE	0	0.991763	false	0	50807	0	0	[A0A0A0MRE5, E5RFD9, E5RHA9, E5RHD7, H0YBF7, H0YBM4, L8E8W2, Q8WWA4, Q9ULH1]	50807
			3.81622	0	Transcription Factor Complex		3.Intra Cellular	3.Intra Cellular	0.26204	1	6	ENSG00000112249	GENE-nonsense_mediated_decay,protein_coding,retained_intron	10973	ASCC3	ASCC3		false	10973	132	0	1	ASSOCIATED_NEW_GENE	0	0.99106	false	0	10973	0	0	[B4DR60, E5RFZ0, J3KNJ4, Q8N3C0]	10973
			3.76757	0			3.Intra Cellular	3.Intra Cellular	0.265423	1	6	ENSG00000133657	GENE-processed_transcript,protein_coding,retained_intron	79572	ATP13A3	ATP13A3		false	79572	108	0	1	ASSOCIATED_NEW_GENE	0	0.991214	false	0	79572	0	0	[A0A2R8Y635, A0A2R8YDN7, C9JAP7, H7C1U7, Q9H7F0]	79572
			3.81622	0			3.Intra Cellular	3.Intra Cellular	0.26204	1	6	ENSG00000154518	GENE-protein_coding,retained_intron	518	ATP5MC3	ATP5MC3		false	518	132	0	1	ASSOCIATED_NEW_GENE	0	0.99106	false	0	518	0	0	[P48201]	518
			3.81622	0			3.Intra Cellular	3.Intra Cellular	0.26204	1	6	ENSG00000173915	GENE-protein_coding	84833	ATP5MK	ATP5MK		false	84833	132	0	1	ASSOCIATED_NEW_GENE	0	0.99106	false	0	84833	0	0	[Q96IX5]	84833
			3.59459	0			3.Intra Cellular	3.Intra Cellular, 5.Nucleus	0.278195	1	4	ENSG00000124788	GENE-processed_transcript,protein_coding	6310	ATXN1	ATXN1		false	6310	147	0	1	ASSOCIATED_NEW_GENE	0	0.991763	false	0	6310	0	0	[A0A024R005, A0A2R8YCF3, P54253, Q96C81, Q96FF1]	6310
			3.20811	0			5.Nucleus	5.Nucleus	0.31171	1	6	ENSG00000224470	GENE-processed_transcript,protein_coding,retained_intron	342371	ATXN1L	ATXN1L		false	342371	315	0	1	ASSOCIATED_NEW_GENE	0	0.99299	false	0	342371	0	0	[G1UI23, P0C7T5]	342371
			3.20811	0			3.Intra Cellular	3.Intra Cellular	0.31171	1	6	ENSG00000168488	GENE-nonsense_mediated_decay,processed_transcript,protein_coding,retained_intron	11273	ATXN2L	ATXN2L		false	11273	315	0	1	ASSOCIATED_NEW_GENE	0	0.99299	false	0	11273	0	0	[A0A024QZ91, A0A024QZB7, A0A024QZC0, A0A0C4DGL7, H3BMX1, H3BPQ7, H3BQ14, H3BQX7, H3BRB0, H3BSK9, H3BSQ5, H3BUE3, H3BUF6, Q8WWM7]	11273
			3.20811	0			1.Extracellular	1.Extracellular, 2.Plasma Membrane	0.31171	1	6	ENSG00000167601	GENE-processed_transcript,protein_coding,retained_intron	558	AXL	AXL		false	558	315	0	1	ASSOCIATED_NEW_GENE	0	0.99299	false	0	558	0	0	[M0R0W6, P30530]	558
			3.76757	0			1.Extracellular	1.Extracellular, 3.Intra Cellular	0.265423	1	6	ENSG00000132692	GENE-nonsense_mediated_decay,protein_coding,retained_intron	63827	BCAN	BCAN		false	63827	108	0	1	ASSOCIATED_NEW_GENE	0	0.991214	false	0	63827	0	0	[L8E931, Q5T3I6, Q5T3I7, Q5T3I8, Q96GW7, V9GXZ8, V9GY88]	63827
			3.76757	0			3.Intra Cellular	3.Intra Cellular, 4.Nuclear Membrane	0.265423	1	6	ENSG00000171552	GENE-nonsense_mediated_decay,processed_transcript,protein_coding	598	BCL2L1	BCL2L1		false	598	108	0	1	ASSOCIATED_NEW_GENE	0	0.991214	false	0	598	0	0	[A0A0S2Z3C5, A0A0S2Z3D2, A0A7I2V597, Q07817, Q5QP56, Q5QP59, Q5TE63, Q5TE64, Q9H1R6]	598
			3.20811	0			3.Intra Cellular	3.Intra Cellular	0.31171	1	6	ENSG00000099968	GENE-nonsense_mediated_decay,processed_transcript,protein_coding	23786	BCL2L13	BCL2L13		false	23786	315	0	1	ASSOCIATED_NEW_GENE	0	0.99299	false	0	23786	0	0	[A0A087WTL4, A0A087WW80, A0A087WX97, A0A0A0MR90, A8K5Y4, B2RB43, B7Z238, B7Z737, E9PDD6, F2Z2C3, F6VJB4, H0Y3R5, Q86T62, Q9BXK5]	23786
			3.76757	0			2.Plasma Membrane	2.Plasma Membrane, 3.Intra Cellular	0.265423	1	6	ENSG00000069399	GENE-processed_transcript,protein_coding,retained_intron	602	BCL3	BCL3		false	602	108	0	1	ASSOCIATED_NEW_GENE	0	0.991214	false	0	602	0	0	[B7Z3N9, H7C0A2, P20749]	602
			3.81622	0			0.Annotation definition not found in 'Homo Sapiens.properties' file	0.Annotation definition not found in 'Homo Sapiens.properties' file	0.26204	1	6	ENSG00000183337	GENE-processed_transcript,protein_coding,retained_intron	54880	BCOR	BCOR		false	54880	132	0	1	ASSOCIATED_NEW_GENE	0	0.99106	false	0	54880	0	0	[A0A5F9ZGX7, A1A564, C9JHP3, H7BYY2, H7BZ37, H7C231, H7C2V9, Q6W2J9]	54880
			3.81622	0			3.Intra Cellular	3.Intra Cellular	0.26204	1	6	ENSG00000102409	GENE-protein_coding	56271	BEX4	BEX4		false	56271	132	0	1	ASSOCIATED_NEW_GENE	0	0.99106	false	0	56271	0	0	[Q9NWD9]	56271
			3.81622	0			1.Extracellular	1.Extracellular, 3.Intra Cellular	0.26204	1	6	ENSG00000198908	GENE-processed_transcript,protein_coding	80823	BHLHB9	BHLHB9		false	80823	132	0	1	ASSOCIATED_NEW_GENE	0	0.99106	false	0	80823	0	0	[Q6PI77]	80823
			3.20811	0			3.Intra Cellular	3.Intra Cellular	0.31171	1	6	ENSG00000023445	GENE-processed_transcript,protein_coding,retained_intron	330	BIRC3	BIRC3		false	330	315	0	1	ASSOCIATED_NEW_GENE	0	0.99299	false	0	330	0	0	[A0A669KBC7, H0YCJ5, L8E7L9, Q13489]	330
			3.20811	0			1.Extracellular	1.Extracellular	0.31171	1	6	ENSG00000101144	GENE-processed_transcript,protein_coding,retained_intron	655	BMP7	BMP7		false	655	315	0	1	ASSOCIATED_NEW_GENE	0	0.99299	false	0	655	0	0	[A0A077CY02, A8K571, B1AKZ9, B1AL00, H0Y4B5, P18075, Q9H2W7, Q9NQQ8]	655
			3.59459	0			2.Plasma Membrane	2.Plasma Membrane, 3.Intra Cellular	0.278195	1	4	ENSG00000162399	GENE-protein_coding	7809	BSND	BSND		false	7809	147	0	1	ASSOCIATED_NEW_GENE	0	0.991763	false	0	7809	0	0	[Q5VU50, Q8WZ55]	7809
			3.59459	0			3.Intra Cellular	3.Intra Cellular	0.278195	1	4	ENSG00000082153	GENE-protein_coding,retained_intron	9689	BZW1	BZW1		false	9689	147	0	1	ASSOCIATED_NEW_GENE	0	0.991763	false	0	9689	0	0	[B3KU41, C9IZ80, C9J188, C9JFN4, C9JV57, C9JWF5, H0Y503, Q3LIC9, Q7L1Q6]	9689
			3.76757	0			2.Plasma Membrane	2.Plasma Membrane, 3.Intra Cellular	0.265423	1	6	ENSG00000171067	GENE-processed_transcript,protein_coding,retained_intron	53838	C11orf24	C11orf24		false	53838	108	0	1	ASSOCIATED_NEW_GENE	0	0.991214	false	0	53838	0	0	[A0A024R5K9, E9PI63, E9PRU5, Q96F05]	53838
			3.76757	0			0.Annotation definition not found in 'Homo Sapiens.properties' file	0.Annotation definition not found in 'Homo Sapiens.properties' file	0.265423	1	6	ENSG00000141371	GENE-protein_coding,retained_intron	124773	C17orf64	C17orf64		false	124773	108	0	1	ASSOCIATED_NEW_GENE	0	0.991214	false	0	124773	0	0	[A0A0G2JLI9, K7EQ24, Q86WR6]	124773
			3.59459	0			3.Intra Cellular	3.Intra Cellular	0.278195	1	4	ENSG00000157617	GENE-processed_transcript,protein_coding,retained_intron	25966	C2CD2	C2CD2		false	25966	147	0	1	ASSOCIATED_NEW_GENE	0	0.991763	false	0	25966	0	0	[H7BZB0, Q6P6D1, Q9Y426]	25966
			3.76757	0			2.Plasma Membrane	2.Plasma Membrane, 3.Intra Cellular	0.265423	1	6	ENSG00000151067	GENE-nonsense_mediated_decay,processed_transcript,protein_coding,retained_intron	775	CACNA1C	CACNA1C		false	775	108	0	1	ASSOCIATED_NEW_GENE	0	0.991214	false	0	775	0	0	[A0A087WUX4, A0A0A0MR67, A0A0A0MSA1, A0A5F9ZHD9, A0A804HHT8, A0A804HI37, A0A804HIJ8, A0A804HIR0, A0A804HIZ0, A0A804HJB6, A0A804HJR1, A0A804HKC4, A0A804HKE1, A0A804HKE9, E9PDI6, F5GY28, F5H522, F5H638, Q13936, Q4G0H8, Q59GU3, Q5V9X8, Q5V9X9, Q86XX0, Q86XX1]	775
			3.59459	0			2.Plasma Membrane	2.Plasma Membrane, 3.Intra Cellular	0.278195	1	4	ENSG00000157388	GENE-nonsense_mediated_decay,processed_transcript,protein_coding,retained_intron	776	CACNA1D	CACNA1D		false	776	147	0	1	ASSOCIATED_NEW_GENE	0	0.991763	false	0	776	0	0	[A0A1B0GTN0, A0A1B0GTP8, A0A1B0GU49, A0A1B0GUB6, A0A1B0GUH2, A0A1B0GUN6, A0A1B0GVI2, A0A1B0GW98, A0A1B0GWE1, A0A1B0GWF7, A0A1W2PQ56, A0A5F9Z6M3, A0A7G9IPG1, H7C4S8, Q01668, Q59GD8]	776
			4.24865	0			3.Intra Cellular	3.Intra Cellular	0.235369	1	6	ENSG00000076826	GENE-protein_coding,retained_intron	57662	CAMSAP3	CAMSAP3		false	57662	48	0	1	ASSOCIATED_NEW_GENE	0	0.989687	false	0	57662	0	0	[Q9P1Y5]	57662
			3.20811	0			3.Intra Cellular	3.Intra Cellular, 5.Nucleus	0.31171	1	6	ENSG00000171735	GENE-nonsense_mediated_decay,processed_transcript,protein_coding	23261	CAMTA1	CAMTA1		false	23261	315	0	1	ASSOCIATED_NEW_GENE	0	0.99299	false	0	23261	0	0	[A0A0C4DGL0, G3V297, H0YJG5, H0YJK7, H0YJR7, H0YJV1, H0YJY7, Q7Z7P1, Q9Y6Y1]	23261
			3.81622	0			1.Extracellular	1.Extracellular, 3.Intra Cellular	0.26204	1	6	ENSG00000111530	GENE-nonsense_mediated_decay,processed_transcript,protein_coding,retained_intron	55832	CAND1	CAND1		false	55832	132	0	1	ASSOCIATED_NEW_GENE	0	0.99106	false	0	55832	0	0	[A0A0C4DGH5, F5H6I6, H0YH27, Q86VP6]	55832
			3.59459	0			1.Extracellular	1.Extracellular, 3.Intra Cellular	0.278195	1	4	ENSG00000198898	GENE-nonsense_mediated_decay,processed_transcript,protein_coding,retained_intron	830	CAPZA2	CAPZA2		false	830	147	0	1	ASSOCIATED_NEW_GENE	0	0.991763	false	0	830	0	0	[A0A0D9SET8, A4D0V4, C9J7V0, C9JCZ4, C9JUG7, F8W9N7, F8WED3, P47755]	830
			3.20811	0	Transcription Factor Complex		4.Nuclear Membrane	4.Nuclear Membrane	0.31171	1	6	ENSG00000122565	GENE-processed_transcript,protein_coding,retained_intron	11335	CBX3	CBX3		false	11335	315	0	1	ASSOCIATED_NEW_GENE	0	0.99299	false	0	11335	0	0	[A4D177, B8ZZ43, C9JMM0, Q13185, S4R2Y4]	11335
			3.59459	0			0.Annotation definition not found in 'Homo Sapiens.properties' file	0.Annotation definition not found in 'Homo Sapiens.properties' file	0.278195	1	4	ENSG00000163081	GENE-lncRNA	151278	CCDC140	CCDC140		false	151278	147	0	1	ASSOCIATED_NEW_GENE	0	0.991763	false	0	151278	0	0	[Q96MF4]	151278
			3.81622	0			0.Annotation definition not found in 'Homo Sapiens.properties' file	0.Annotation definition not found in 'Homo Sapiens.properties' file	0.26204	1	6	ENSG00000205212	GENE-processed_transcript,transcribed_unprocessed_pseudogene	339184	CCDC144NL	CCDC144NL		false	339184	132	0	1	ASSOCIATED_NEW_GENE	0	0.99106	false	0	339184	0	0	[Q6NUI1]	339184
			3.59459	0			0.Annotation definition not found in 'Homo Sapiens.properties' file	0.Annotation definition not found in 'Homo Sapiens.properties' file	0.278195	1	4	ENSG00000122483	GENE-nonsense_mediated_decay,processed_transcript,protein_coding,retained_intron	343099	CCDC18	CCDC18		false	343099	147	0	1	ASSOCIATED_NEW_GENE	0	0.991763	false	0	343099	0	0	[E9PFB9, H0YCD6, H0YDP2, H7C0C9, J3KP97, Q5T9S2, Q5T9S5, Q6PH87, Q7Z659]	343099
			3.76757	0			1.Extracellular	1.Extracellular, 3.Intra Cellular	0.265423	1	6	ENSG00000284862	GENE-processed_transcript,protein_coding,retained_intron	339829	CCDC39	CCDC39		false	339829	108	0	1	ASSOCIATED_NEW_GENE	0	0.991214	false	0	339829	0	0	[A0A494C1Q3, H7C4X6, H7C5I6, Q9UFE4]	339829
			3.59459	0			0.Annotation definition not found in 'Homo Sapiens.properties' file	0.Annotation definition not found in 'Homo Sapiens.properties' file	0.278195	1	4	ENSG00000253276	GENE-protein_coding	168455	CCDC71L	CCDC71L		false	168455	147	0	1	ASSOCIATED_NEW_GENE	0	0.991763	false	0	168455	0	0	[A0A0C4DGU7, Q8N9Z2]	168455
			3.20811	0			1.Extracellular	1.Extracellular	0.31171	1	6	ENSG00000102962	GENE-protein_coding	6367	CCL22	CCL22		false	6367	315	0	1	ASSOCIATED_NEW_GENE	0	0.99299	false	0	6367	0	0	[O00626]	6367
			3.20811	0			3.Intra Cellular	3.Intra Cellular	0.31171	1	6	ENSG00000175305	GENE-nonsense_mediated_decay,processed_transcript,protein_coding,retained_intron	9134	CCNE2	CCNE2		false	9134	315	0	1	ASSOCIATED_NEW_GENE	0	0.99299	false	0	9134	0	0	[A0A024R9B0, E5RHN2, E5RK20, H0YBQ2, I6L961, L8EBC7, O96020, Q8WUE3]	9134
			3.76757	0			3.Intra Cellular	3.Intra Cellular, 4.Nuclear Membrane	0.265423	1	6	ENSG00000118816	GENE-nonsense_mediated_decay,processed_transcript,protein_coding,retained_intron	10983	CCNI	CCNI		false	10983	108	0	1	ASSOCIATED_NEW_GENE	0	0.991214	false	0	10983	0	0	[A0A024RDH0, D6RDK3, D6REZ3, D6RG12, D6RH01, H0YA27, Q14094, Q6FHH0]	10983
			3.20811	0			2.Plasma Membrane	2.Plasma Membrane	0.31171	1	6	ENSG00000272398	GENE-processed_transcript,protein_coding	100133941	CD24	CD24		false	100133941	315	0	1	ASSOCIATED_NEW_GENE	0	0.99299	false	0	100133941	0	0	[A0A087WU21, A0A087WU87, A0A087WW33, P25063]	100133941
			3.20811	0			1.Extracellular	1.Extracellular, 2.Plasma Membrane, 3.Intra Cellular	0.31171	1	6	ENSG00000026508	GENE-nonsense_mediated_decay,processed_transcript,protein_coding,retained_intron	960	CD44	CD44		false	960	315	0	1	ASSOCIATED_NEW_GENE	0	0.99299	false	0	960	0	0	[A0A1W2PR55, A0A1Z1VXF2, A0A385KNS5, C0STK4, C1PHC2, C1PHC3, C1PHC4, C1PHE6, E9PKC6, H0Y2P0, H0Y5E4, H0YCL4, H0YCV9, H0YD13, H0YD17, H0YD90, H0YDV8, H0YDW7, H0YDX6, H0YE40, H0YEA1, H0YES0, H0YEU1, H0YEV3, H0YF08, J3KN83, O95658, O95659, P16070, Q86UZ1, Q99900, Q9P2Z2]	960
			3.59459	0			1.Extracellular	1.Extracellular, 2.Plasma Membrane, 3.Intra Cellular	0.278195	1	4	ENSG00000196352	GENE-nonsense_mediated_decay,processed_transcript,protein_coding,retained_intron	1604	CD55	CD55		false	1604	147	0	1	ASSOCIATED_NEW_GENE	0	0.991763	false	0	1604	0	0	[A0A172WBW8, A0A223PIC2, A0A2H4ZEU7, A0A2R8Y4B4, A0A2R8YDY3, A0A2R8YEC5, A0A7G9ZDP2, B1AP13, B1AP15, D3DT85, D3DT86, H3BLV0, H7BY55, P08174]	1604
			3.20811	0			2.Plasma Membrane	2.Plasma Membrane, 3.Intra Cellular	0.31171	1	6	ENSG00000140326	GENE-nonsense_mediated_decay,protein_coding,retained_intron	146059	CDAN1	CDAN1		false	146059	315	0	1	ASSOCIATED_NEW_GENE	0	0.99299	false	0	146059	0	0	[A0A2R8Y5C2, H3BM60, H3BPZ6, Q8IWY9]	146059
			3.81622	0			3.Intra Cellular	3.Intra Cellular	0.26204	1	6	ENSG00000101224	GENE-processed_transcript,protein_coding	994	CDC25B	CDC25B		false	994	132	0	1	ASSOCIATED_NEW_GENE	0	0.99106	false	0	994	0	0	[B3KS38, B4DIG0, B4DQZ3, B4DRC3, E1YMX4, G8JLH2, L8E819, O43550, P30305, Q6MZW8, Q7LDQ7]	994
			3.76757	0			1.Extracellular	1.Extracellular, 2.Plasma Membrane, 3.Intra Cellular	0.265423	1	6	ENSG00000070831	GENE-nonsense_mediated_decay,protein_coding	998	CDC42	CDC42		false	998	108	0	1	ASSOCIATED_NEW_GENE	0	0.991214	false	0	998	0	0	[A0A024RAA5, A0A024RAE6, A0A3B3IRV0, A0A494BZX6, A0A494C1M1, A0A590UJK8, P60953, Q5JYX0]	998
			3.20811	0	Transcription Factor Complex		3.Intra Cellular	3.Intra Cellular, 4.Nuclear Membrane, 5.Nucleus	0.31171	1	6	ENSG00000135446	GENE-nonsense_mediated_decay,processed_transcript,protein_coding,retained_intron	1019	CDK4	CDK4		false	1019	315	0	1	ASSOCIATED_NEW_GENE	0	0.99299	false	0	1019	0	0	[A0A024RBB6, A0A6H0CER3, F8VTV8, F8VWX7, F8VXD2, F8VYH9, F8VYY1, F8VZ13, F8VZ51, F8VZZ0, F8W1L8, P11802, Q6LC83, Q96BE9]	1019
			3.76757	0			2.Plasma Membrane	2.Plasma Membrane, 3.Intra Cellular	0.265423	1	6	ENSG00000176749	GENE-nonsense_mediated_decay,protein_coding	8851	CDK5R1	CDK5R1		false	8851	108	0	1	ASSOCIATED_NEW_GENE	0	0.991214	false	0	8851	0	0	[J3QRB5, Q15078, Q8N619, Q8TAM4]	8851
			3.76757	0			3.Intra Cellular	3.Intra Cellular, 5.Nucleus	0.265423	1	6	ENSG00000124762	GENE-processed_transcript,protein_coding	1026	CDKN1A	CDKN1A		false	1026	108	0	1	ASSOCIATED_NEW_GENE	0	0.991214	false	0	1026	0	0	[A0A024RCX5, P38936]	1026
			3.20811	0			3.Intra Cellular	3.Intra Cellular	0.31171	1	6	ENSG00000111276	GENE-processed_transcript,protein_coding,retained_intron	1027	CDKN1B	CDKN1B		false	1027	315	0	1	ASSOCIATED_NEW_GENE	0	0.99299	false	0	1027	0	0	[A7KMP4, E7ES52, H7C2T1, P46527, Q6I9V6, Q708J1]	1027
			3.20811	0			3.Intra Cellular	3.Intra Cellular	0.31171	1	6	ENSG00000123080	GENE-protein_coding	1031	CDKN2C	CDKN2C		false	1031	315	0	1	ASSOCIATED_NEW_GENE	0	0.99299	false	0	1031	0	0	[P42773, Q6ICV4, Q9P1T2]	1031
			3.81622	0			3.Intra Cellular	3.Intra Cellular	0.26204	1	6	ENSG00000048740	GENE-nonsense_mediated_decay,protein_coding	10659	CELF2	CELF2		false	10659	132	0	1	ASSOCIATED_NEW_GENE	0	0.99106	false	0	10659	0	0	[A0A0J9YX66, A0A0J9YXJ0, A0A0J9YXK1, A0A1B0GU44, A0A1B0GUN8, B4DDE7, B4DIB6, B4DT00, B4DZ01, E9PC62, O95319, Q5VZZ6, V9GY47, V9GYD9]	10659
			3.59459	0			3.Intra Cellular	3.Intra Cellular	0.278195	1	4	ENSG00000100162	GENE-protein_coding,retained_intron	79019	CENPM	CENPM		false	79019	147	0	1	ASSOCIATED_NEW_GENE	0	0.991763	false	0	79019	0	0	[A0A024R1Q3, B1AHQ6, B1AHQ7, B1AHQ8, Q9NSP4]	79019
			3.59459	0			3.Intra Cellular	3.Intra Cellular	0.278195	1	4	ENSG00000166451	GENE-nonsense_mediated_decay,processed_transcript,protein_coding	55839	CENPN	CENPN		false	55839	147	0	1	ASSOCIATED_NEW_GENE	0	0.991763	false	0	55839	0	0	[H3BMC7, H3BMD5, H3BRU7, Q96H22]	55839
			3.76757	0			3.Intra Cellular	3.Intra Cellular	0.265423	1	6	ENSG00000143418	GENE-processed_transcript,protein_coding,retained_intron	29956	CERS2	CERS2		false	29956	108	0	1	ASSOCIATED_NEW_GENE	0	0.991214	false	0	29956	0	0	[H0YKH6, H0YLQ6, H0YNU7, Q5SZE1, Q5SZE2, Q5SZE3, Q5SZE4, Q96G23]	29956
			3.81622	0			3.Intra Cellular	3.Intra Cellular	0.26204	1	6	ENSG00000172292	GENE-protein_coding	253782	CERS6	CERS6		false	253782	132	0	1	ASSOCIATED_NEW_GENE	0	0.99106	false	0	253782	0	0	[Q6ZMG9]	253782
			3.20811	0			1.Extracellular	1.Extracellular, 2.Plasma Membrane, 3.Intra Cellular	0.31171	1	6	ENSG00000172757	GENE-processed_transcript,protein_coding,retained_intron	1072	CFL1	CFL1		false	1072	315	0	1	ASSOCIATED_NEW_GENE	0	0.99299	false	0	1072	0	0	[E9PK25, E9PLJ3, E9PP50, E9PQB7, E9PS23, G3V1A4, P23528, V9HWI5]	1072
			3.59459	0			1.Extracellular	1.Extracellular, 3.Intra Cellular	0.278195	1	4	ENSG00000106554	GENE-nonsense_mediated_decay,processed_transcript,protein_coding	54927	CHCHD3	CHCHD3		false	54927	147	0	1	ASSOCIATED_NEW_GENE	0	0.991763	false	0	54927	0	0	[A0A286YEX5, A4D1N4, B7Z1X9, C9JRZ6, F8WAR4, Q9NX63]	54927
			3.59459	0			3.Intra Cellular	3.Intra Cellular	0.278195	1	4	ENSG00000163528	GENE-processed_transcript,protein_coding	131474	CHCHD4	CHCHD4		false	131474	147	0	1	ASSOCIATED_NEW_GENE	0	0.991763	false	0	131474	0	0	[A0A024R2F8, A0A024R2I5, Q8N4Q1]	131474
			4.24865	0			1.Extracellular	1.Extracellular, 3.Intra Cellular	0.235369	1	6	ENSG00000149554	GENE-nonsense_mediated_decay,protein_coding,retained_intron	1111	CHEK1	CHEK1		false	1111	48	0	1	ASSOCIATED_NEW_GENE	0	0.989687	false	0	1111	0	0	[A0A087WT52, B4DT73, E7EPP6, E9PJI4, E9PKQ3, E9PPA5, E9PQW7, E9PRU7, O14757, Q6W8P8]	1111
			3.20811	0	Transcription Factor Complex		1.Extracellular	1.Extracellular, 2.Plasma Membrane, 3.Intra Cellular	0.31171	1	6	ENSG00000085872	GENE-processed_transcript,protein_coding,retained_intron	10523	CHERP	CHERP		false	10523	315	0	1	ASSOCIATED_NEW_GENE	0	0.99299	false	0	10523	0	0	[J3QK89, Q8IWX8]	10523
			3.76757	0			1.Extracellular	1.Extracellular, 2.Plasma Membrane, 3.Intra Cellular	0.265423	1	6	ENSG00000115561	GENE-processed_transcript,protein_coding	51652	CHMP3	CHMP3		false	51652	108	0	1	ASSOCIATED_NEW_GENE	0	0.991214	false	0	51652	0	0	[Q9Y3E7]	51652
			3.81622	0			0.Annotation definition not found in 'Homo Sapiens.properties' file	0.Annotation definition not found in 'Homo Sapiens.properties' file	0.26204	1	6	ENSG00000173207	GENE-processed_transcript,protein_coding	1163	CKS1B	CKS1B		false	1163	132	0	1	ASSOCIATED_NEW_GENE	0	0.99106	false	0	1163	0	0	[D3DV79, P61024, Q5T178, Q5T179, Q9BZU3]	1163
			5.45946	0			2.Plasma Membrane	2.Plasma Membrane, 3.Intra Cellular	0.183168	1	6	ENSG00000074201	GENE-nonsense_mediated_decay,processed_transcript,protein_coding,retained_intron	1207	CLNS1A	CLNS1A		false	1207	25	0	1	ASSOCIATED_NEW_GENE	0	0.985843	false	0	1207	0	0	[E9PJF4, E9PMI6, E9PQ83, H0YEN9, J3KN38, P54105, U3KPU0]	1207
			3.20811	0			2.Plasma Membrane	2.Plasma Membrane, 3.Intra Cellular	0.31171	1	6	ENSG00000175416	GENE-nonsense_mediated_decay,processed_transcript,protein_coding	1212	CLTB	CLTB		false	1212	315	0	1	ASSOCIATED_NEW_GENE	0	0.99299	false	0	1212	0	0	[A0A024R7S3, B4DTF9, D6RJD1, H0Y9Q6, P09497]	1212
			3.81622	0			1.Extracellular	1.Extracellular, 2.Plasma Membrane, 3.Intra Cellular	0.26204	1	6	ENSG00000120885	GENE-protein_coding,retained_intron	1191	CLU	CLU		false	1191	132	0	1	ASSOCIATED_NEW_GENE	0	0.99106	false	0	1191	0	0	[E5RG36, E5RGB0, E5RH61, E5RJD6, E5RJZ5, E7ERK6, E7ETB4, H0YAS8, H0YC35, H0YLK8, P10909, Q8IWM0]	1191
			3.76757	0			0.Annotation definition not found in 'Homo Sapiens.properties' file	0.Annotation definition not found in 'Homo Sapiens.properties' file	0.265423	1	6	ENSG00000183723	GENE-protein_coding,retained_intron	146223	CMTM4	CMTM4		false	146223	108	0	1	ASSOCIATED_NEW_GENE	0	0.991214	false	0	146223	0	0	[J3QRP2, Q8IZR5]	146223
			3.59459	0			2.Plasma Membrane	2.Plasma Membrane, 3.Intra Cellular	0.278195	1	4	ENSG00000091317	GENE-protein_coding,retained_intron	54918	CMTM6	CMTM6		false	54918	147	0	1	ASSOCIATED_NEW_GENE	0	0.991763	false	0	54918	0	0	[Q9NX76]	54918
			3.76757	0			1.Extracellular	1.Extracellular, 3.Intra Cellular	0.265423	1	6	ENSG00000064666	GENE-nonsense_mediated_decay,protein_coding,retained_intron	1265	CNN2	CNN2		false	1265	108	0	1	ASSOCIATED_NEW_GENE	0	0.991214	false	0	1265	0	0	[A0A087WV51, A0A087X1X5, A0A087X271, B2RWM5, B4DDF4, B4DUT8, H3BQH0, H3BVI6, K7ES69, Q6FHC3, Q6FHE4, Q99439, U3KPS3]	1265
			4.24865	0			2.Plasma Membrane	2.Plasma Membrane, 3.Intra Cellular	0.235369	1	6	ENSG00000174469	GENE-processed_transcript,protein_coding,retained_intron	26047	CNTNAP2	CNTNAP2		false	26047	48	0	1	ASSOCIATED_NEW_GENE	0	0.989687	false	0	26047	0	0	[A0A090N7T7, A0A0D9SES4, A0A0J9YWG3, A0A0J9YYA0, B2RCH4, B7Z1Y6, O75852, Q75LG9, Q75M92, Q75MA1, Q75MD4, Q75MF6, Q75MF8, Q75MQ9, Q86UI8, Q86UJ1, Q86UL4, Q86UL6, Q86UL9, Q96T77, Q96T78, Q96T79, Q96T80, Q9UDV4, Q9UHC6, X5D2E8, X5D7C2, X5D8X9, X5D9M6, X5DNH4, X5DQU5, X5DRL0]	26047
			3.59459	0			3.Intra Cellular	3.Intra Cellular	0.278195	1	4	ENSG00000181924	GENE-processed_transcript,protein_coding	51287	COA4	COA4		false	51287	147	0	1	ASSOCIATED_NEW_GENE	0	0.991763	false	0	51287	0	0	[A0A024R5J6, Q9NYJ1]	51287
			3.76757	0			1.Extracellular	1.Extracellular, 3.Intra Cellular	0.265423	1	6	ENSG00000108821	GENE-protein_coding,retained_intron	1277	COL1A1	COL1A1		false	1277	108	0	1	ASSOCIATED_NEW_GENE	0	0.991214	false	0	1277	0	0	[D3DTX7, H9C5C5, I3L3H7, L0R6F3, O00604, P02452, Q16053, Q6LAN8, Q9UE86, Q9UMA6, Q9UNF2, T1RTD8]	1277
			3.81622	0			3.Intra Cellular	3.Intra Cellular	0.26204	1	6	ENSG00000144524	GENE-nonsense_mediated_decay,protein_coding,retained_intron	64708	COPS7B	COPS7B		false	64708	132	0	1	ASSOCIATED_NEW_GENE	0	0.99106	false	0	64708	0	0	[A0A024R471, A0A024R478, A0A087X1P5, J3KQ34, J3KQ41, J3KQV6, J3QT43, J3QT50, J3QT65, J3QT66, J3QT67, J3QT69, J3QT73, J3QT95, Q6ZTQ7, Q9H9Q2]	64708
			3.20811	0			3.Intra Cellular	3.Intra Cellular	0.31171	1	6	ENSG00000111481	GENE-nonsense_mediated_decay,processed_transcript,protein_coding,retained_intron	22818	COPZ1	COPZ1		false	22818	315	0	1	ASSOCIATED_NEW_GENE	0	0.99299	false	0	22818	0	0	[A0A024RB72, F8VUC5, F8VVA7, F8VXB1, F8VXR1, F8VYE0, F8VYK5, F8VYZ4, F8W156, F8W651, L0R4W7, P61923]	22818
			3.20811	0			2.Plasma Membrane	2.Plasma Membrane, 3.Intra Cellular	0.31171	1	6	ENSG00000107864	GENE-protein_coding	22849	CPEB3	CPEB3		false	22849	315	0	1	ASSOCIATED_NEW_GENE	0	0.99299	false	0	22849	0	0	[B3KXC1, Q5QP71, Q8NE35]	22849
			3.20811	0			3.Intra Cellular	3.Intra Cellular, 5.Nucleus	0.31171	1	6	ENSG00000157184	GENE-nonsense_mediated_decay,protein_coding,retained_intron	1376	CPT2	CPT2		false	1376	315	0	1	ASSOCIATED_NEW_GENE	0	0.99299	false	0	1376	0	0	[A0A140VK13, A0A1B0GTB8, A0A1B0GTL9, A0A1B0GTM0, A0A1B0GUB8, A0A1B0GUD9, A0A1B0GV75, A0A1B0GVF3, A0A1B0GWC0, P23786]	1376
			3.81622	0	Transcription Factor Complex		3.Intra Cellular	3.Intra Cellular	0.26204	1	6	ENSG00000137504	GENE-nonsense_mediated_decay,processed_transcript,protein_coding,retained_intron	58487	CREBZF	CREBZF		false	58487	132	0	1	ASSOCIATED_NEW_GENE	0	0.99106	false	0	58487	0	0	[E9PIM0, H0YDC7, J3KN20, Q9NS37]	58487
			3.81622	0			2.Plasma Membrane	2.Plasma Membrane, 3.Intra Cellular	0.26204	1	6	ENSG00000099942	GENE-nonsense_mediated_decay,protein_coding	1399	CRKL	CRKL		false	1399	132	0	1	ASSOCIATED_NEW_GENE	0	0.99106	false	0	1399	0	0	[L8E7R7, P46109]	1399
			3.20811	0			3.Intra Cellular	3.Intra Cellular	0.31171	1	6	ENSG00000160202	GENE-processed_transcript,protein_coding,retained_intron	1409	CRYAA	CRYAA		false	1409	315	0	1	ASSOCIATED_NEW_GENE	0	0.99299	false	0	1409	0	0	[A0A140G952, A0A140G954, A0A140G955, A0A8C8KJZ9, E7EWH7, P02489, Q71V83]	1409
			3.20811	0			0.Annotation definition not found in 'Homo Sapiens.properties' file	0.Annotation definition not found in 'Homo Sapiens.properties' file	0.31171	1	6	ENSG00000112297	GENE-protein_coding,retained_intron	202	CRYBG1	CRYBG1		false	202	315	0	1	ASSOCIATED_NEW_GENE	0	0.99299	false	0	202	0	0	[A0A0J9YWL0, A0A494C1M5, B3KPT0, Q96QW7, Q9Y4K1]	202
			3.20811	0			1.Extracellular	1.Extracellular, 3.Intra Cellular	0.31171	1	6	ENSG00000124207	GENE-processed_transcript,protein_coding	1434	CSE1L	CSE1L		false	1434	315	0	1	ASSOCIATED_NEW_GENE	0	0.99299	false	0	1434	0	0	[A0A384NKW7, P55060]	1434
			3.20811	0			2.Plasma Membrane	2.Plasma Membrane	0.31171	1	6	ENSG00000182578	GENE-nonsense_mediated_decay,processed_transcript,protein_coding,retained_intron	1436	CSF1R	CSF1R		false	1436	315	0	1	ASSOCIATED_NEW_GENE	0	0.99299	false	0	1436	0	0	[A2VDG3, D6RGW1, E9PEK4, H0YAL5, P07333, Q14085]	1436
			3.59459	0			3.Intra Cellular	3.Intra Cellular	0.278195	1	4	ENSG00000113712	GENE-nonsense_mediated_decay,processed_transcript,protein_coding	1452	CSNK1A1	CSNK1A1		false	1452	147	0	1	ASSOCIATED_NEW_GENE	0	0.991763	false	0	1452	0	0	[A0A590UJ43, A0A590UJQ7, A0A590UK94, A0A5F9W493, B4DER9, D6REM4, D6RGE5, E5RG27, E7ETM0, H0Y9X2, P48729, Q05DL3, Q6PJ06, U3KPX3, U3KQ83, U3KQK7]	1452
			3.59459	0	Transcription Factor Complex		2.Plasma Membrane	2.Plasma Membrane, 3.Intra Cellular	0.278195	1	4	ENSG00000101266	GENE-nonsense_mediated_decay,protein_coding,retained_intron	1457	CSNK2A1	CSNK2A1		false	1457	147	0	1	ASSOCIATED_NEW_GENE	0	0.991763	false	0	1457	0	0	[A0A087WY74, A0A2R8Y3W6, A0A2R8Y4D6, A0A2R8Y4H0, A0A2R8Y5A0, A0A2R8Y797, A0A2R8Y7T1, A0A2R8YCC9, A0A2R8YCK2, A0A2R8YD58, A0A2R8YDP2, A0A2R8YDY7, A0A2R8YEL7, A0A2R8YEW1, A0A2R8YF43, A0A2R8YF47, A0A2R8YFU2, B5BUH5, E7EU96, P68400, Q5U5J2, V9GY80, V9GYA2, V9GYW6]	1457
			3.59459	0			0.Annotation definition not found in 'Homo Sapiens.properties' file	0.Annotation definition not found in 'Homo Sapiens.properties' file	0.278195	1	4	ENSG00000177613	GENE-protein_coding	23283	CSTF2T	CSTF2T		false	23283	147	0	1	ASSOCIATED_NEW_GENE	0	0.991763	false	0	23283	0	0	[Q9H0L4]	23283
			3.20811	0	Transcription Factor Complex		1.Extracellular	1.Extracellular, 2.Plasma Membrane, 3.Intra Cellular	0.31171	1	6	ENSG00000168036	GENE-nonsense_mediated_decay,processed_transcript,protein_coding,retained_intron	1499	CTNNB1	CTNNB1		false	1499	315	0	1	ASSOCIATED_NEW_GENE	0	0.99299	false	0	1499	0	0	[A0A024R2Q3, A0A2R8Y543, A0A2R8Y5A3, A0A2R8Y5C3, A0A2R8Y5Z1, A0A2R8Y6G0, A0A2R8Y750, A0A2R8Y7Z0, A0A2R8Y804, A0A2R8Y815, A0A2R8YCH5, A0A2R8YG06, B4DGU4, B5BU28, C9IZ65, G9GAG7, P35222]	1499
			3.20811	0			2.Plasma Membrane	2.Plasma Membrane, 3.Intra Cellular	0.31171	1	6	ENSG00000085733	GENE-nonsense_mediated_decay,processed_transcript,protein_coding,retained_intron	2017	CTTN	CTTN		false	2017	315	0	1	ASSOCIATED_NEW_GENE	0	0.99299	false	0	2017	0	0	[A0A024R5M3, A0A0B6XJY7, H0YCD9, H0YEV2, Q14247, Q53HG7]	2017
			3.81622	0			3.Intra Cellular	3.Intra Cellular	0.26204	1	6	ENSG00000008283	GENE-processed_transcript,protein_coding,retained_intron	1534	CYB561	CYB561		false	1534	132	0	1	ASSOCIATED_NEW_GENE	0	0.99106	false	0	1534	0	0	[B3KTA1, F5H757, J3KSL5, J3QKN3, J3QLS0, J3QR25, J3QRF9, J3QRH5, J3QS09, J3QS47, P49447]	1534
			3.20811	0			2.Plasma Membrane	2.Plasma Membrane, 3.Intra Cellular	0.31171	1	6	ENSG00000165168	GENE-nonsense_mediated_decay,processed_transcript,protein_coding	1536	CYBB	CYBB		false	1536	315	0	1	ASSOCIATED_NEW_GENE	0	0.99299	false	0	1536	0	0	[A0A0S2Z3S6, A0A0S2Z4A9, A0A8G0YK02, A0A8G0YK19, G8Z8Y8, P04839, V9GZH6, V9GZN7]	1536
			5.45946	0			0.Annotation definition not found in 'Homo Sapiens.properties' file	0.Annotation definition not found in 'Homo Sapiens.properties' file	0.183168	1	6	ENSG00000119004	GENE-nonsense_mediated_decay,processed_transcript,protein_coding	57404	CYP20A1	CYP20A1		false	57404	25	0	1	ASSOCIATED_NEW_GENE	0	0.985843	false	0	57404	0	0	[C9J8K7, E9PHG5, F2Z3K6, F8WBE2, Q53RS5, Q567U3, Q6UW02, Q8WZ13]	57404
			3.20811	0			3.Intra Cellular	3.Intra Cellular	0.31171	1	6	ENSG00000001630	GENE-protein_coding,retained_intron	1595	CYP51A1	CYP51A1		false	1595	315	0	1	ASSOCIATED_NEW_GENE	0	0.99299	false	0	1595	0	0	[H7C0D0, Q05D40, Q16850]	1595
			3.76757	0			0.Annotation definition not found in 'Homo Sapiens.properties' file	0.Annotation definition not found in 'Homo Sapiens.properties' file	0.265423	1	6	ENSG00000172992	GENE-nonsense_mediated_decay,protein_coding,retained_intron	79877	DCAKD	DCAKD		false	79877	108	0	1	ASSOCIATED_NEW_GENE	0	0.991214	false	0	79877	0	0	[K7ESP4, Q8WVC6]	79877
			3.20811	0			1.Extracellular	1.Extracellular, 3.Intra Cellular	0.31171	1	6	ENSG00000153904	GENE-protein_coding	23576	DDAH1	DDAH1		false	23576	315	0	1	ASSOCIATED_NEW_GENE	0	0.99299	false	0	23576	0	0	[B2R644, B4DGT0, B4DYP1, B4E3V1, O94760]	23576
			3.20811	0			1.Extracellular	1.Extracellular, 3.Intra Cellular	0.31171	1	6	ENSG00000206395	GENE-processed_transcript,protein_coding,retained_intron	23564	DDAH2	DDAH2		false	23564	315	0	1	ASSOCIATED_NEW_GENE	0	0.99299	false	0	23564	0	0	[A0A140T971, H0Y7N1, O95865, Q5SRR8, Q5SSV3, V9HW53]	23564
			3.59459	0			3.Intra Cellular	3.Intra Cellular	0.278195	1	4	ENSG00000100523	GENE-nonsense_mediated_decay,processed_transcript,protein_coding,retained_intron	80821	DDHD1	DDHD1		false	80821	147	0	1	ASSOCIATED_NEW_GENE	0	0.991763	false	0	80821	0	0	[A0A087X0H7, A0A669KAW5, A0A669KB51, A0A669KB64, A0A6E1W401, G3V2P6, Q8NEL9]	80821
			4.24865	0			3.Intra Cellular	3.Intra Cellular	0.235369	1	6	ENSG00000085788	GENE-nonsense_mediated_decay,processed_transcript,protein_coding,retained_intron	23259	DDHD2	DDHD2		false	23259	48	0	1	ASSOCIATED_NEW_GENE	0	0.989687	false	0	23259	0	0	[B3KPM6, E9PIF5, E9PK57, E9PKE6, E9PM60, E9PP45, E9PPH8, E9PPN2, E9PQY9, H0YE64, H0YF17, H0YF30, O94830]	23259
			5.45946	0			3.Intra Cellular	3.Intra Cellular	0.183168	1	6	ENSG00000168209	GENE-nonsense_mediated_decay,protein_coding,retained_intron	54541	DDIT4	DDIT4		false	54541	25	0	1	ASSOCIATED_NEW_GENE	0	0.985843	false	0	54541	0	0	[A0A024QZQ6, A0A7P0Z4M7, Q9NX09]	54541
			3.20811	0			0.Annotation definition not found in 'Homo Sapiens.properties' file	0.Annotation definition not found in 'Homo Sapiens.properties' file	0.31171	1	6	ENSG00000178105	GENE-nonsense_mediated_decay,processed_transcript,protein_coding,retained_intron	1662	DDX10	DDX10		false	1662	315	0	1	ASSOCIATED_NEW_GENE	0	0.99299	false	0	1662	0	0	[A0A3B3ISR7, E9PIF2, Q13206, Q86VR6]	1662
			3.20811	0			1.Extracellular	1.Extracellular, 3.Intra Cellular	0.31171	1	6	ENSG00000157349	GENE-nonsense_mediated_decay,processed_transcript,protein_coding,retained_intron	11269	DDX19B	DDX19B		false	11269	315	0	1	ASSOCIATED_NEW_GENE	0	0.99299	false	0	11269	0	0	[A0A024QZ90, A0A0U4B4U6, B4DL69, H3BMQ5, H3BMV7, H3BPV3, H3BQK0, H3BTX1, H3BUH0, Q2NL95, Q9UMR2]	11269
			4.24865	0			3.Intra Cellular	3.Intra Cellular	0.235369	1	6	ENSG00000123136	GENE-nonsense_mediated_decay,processed_transcript,protein_coding,retained_intron	10212	DDX39A	DDX39A		false	10212	48	0	1	ASSOCIATED_NEW_GENE	0	0.989687	false	0	10212	0	0	[A0A0D9SEM9, K7EIL8, K7EL56, K7EN69, K7ENP6, K7EPJ3, K7EQN7, O00148]	10212
			3.81622	0			3.Intra Cellular	3.Intra Cellular	0.26204	1	6	ENSG00000110367	GENE-protein_coding,retained_intron	1656	DDX6	DDX6		false	1656	132	0	1	ASSOCIATED_NEW_GENE	0	0.99106	false	0	1656	0	0	[B2R858, P26196, Q8IV96]	1656
			3.81622	0			0.Annotation definition not found in 'Homo Sapiens.properties' file	0.Annotation definition not found in 'Homo Sapiens.properties' file	0.26204	1	6	ENSG00000139726	GENE-protein_coding,retained_intron	8562	DENR	DENR		false	8562	132	0	1	ASSOCIATED_NEW_GENE	0	0.99106	false	0	8562	0	0	[A0A024RBR3, F8VVL1, L8E7I3, O43583]	8562
			3.20811	0			3.Intra Cellular	3.Intra Cellular	0.31171	1	6	ENSG00000114956	GENE-nonsense_mediated_decay,processed_transcript,protein_coding	1716	DGUOK	DGUOK		false	1716	315	0	1	ASSOCIATED_NEW_GENE	0	0.99299	false	0	1716	0	0	[A0A0S2Z3N1, A0A0S2Z3T7, D6W5I0, E5KSL5, E5KSL6, Q16854, Q9BVK7]	1716
			4.24865	0			3.Intra Cellular	3.Intra Cellular	0.235369	1	6	ENSG00000228716	GENE-processed_transcript,protein_coding,retained_intron	1719	DHFR	DHFR		false	1719	48	0	1	ASSOCIATED_NEW_GENE	0	0.989687	false	0	1719	0	0	[A0A024RAQ3, B0YJ76, B4DM58, P00374]	1719
			5.45946	0			3.Intra Cellular	3.Intra Cellular, 5.Nucleus	0.183168	1	6	ENSG00000005100	GENE-nonsense_mediated_decay,protein_coding,retained_intron	56919	DHX33	DHX33		false	56919	25	0	1	ASSOCIATED_NEW_GENE	0	0.985843	false	0	56919	0	0	[B4DIS6, I3L0M5, I3L1L6, Q05BE5, Q9H6R0]	56919
			3.81622	0			1.Extracellular	1.Extracellular, 3.Intra Cellular	0.26204	1	6	ENSG00000100697	GENE-nonsense_mediated_decay,processed_transcript,protein_coding,retained_intron	23405	DICER1	DICER1		false	23405	132	0	1	ASSOCIATED_NEW_GENE	0	0.99106	false	0	23405	0	0	[A0A6Q8PFV4, A0A6Q8PH99, A0A6Q8PHG6, A0A7I2YBM0, A0A8F5XQU3, F6SZ09, H0YJZ6, Q5D0K5, Q9UPY3]	23405
			3.59459	0			3.Intra Cellular	3.Intra Cellular	0.278195	1	4	ENSG00000162946	GENE-nonsense_mediated_decay,processed_transcript,protein_coding,retained_intron	27185	DISC1	DISC1		false	27185	147	0	1	ASSOCIATED_NEW_GENE	0	0.991763	false	0	27185	0	0	[A0A087WYX6, A7E2W8, C4P092, C4P093, C4P094, C4P096, C4P098, C4P0A0, C4P0A4, C4P0A5, C4P0A9, C4P0B0, C4P0B1, C4P0B2, C4P0C4, C4P0C7, C4P0C8, C4P0D0, C4P0D1, C4P0D2, C4P0D3, H0Y7U2, Q9NRI5, X5DQV8]	27185
			3.20811	0			3.Intra Cellular	3.Intra Cellular	0.31171	1	6	ENSG00000167646	GENE-nonsense_mediated_decay,processed_transcript,protein_coding,retained_intron	352909	DNAAF3	DNAAF3		false	352909	315	0	1	ASSOCIATED_NEW_GENE	0	0.99299	false	0	352909	0	0	[H0YCU4, H0YD30, M0R2L0, M0R359, Q8N9W5]	352909
			3.20811	0			3.Intra Cellular	3.Intra Cellular	0.31171	1	6	ENSG00000105993	GENE-nonsense_mediated_decay,processed_transcript,protein_coding,retained_intron	10049	DNAJB6	DNAJB6		false	10049	315	0	1	ASSOCIATED_NEW_GENE	0	0.99299	false	0	10049	0	0	[A0A0J9YX62, C9J2C4, C9J2P2, C9JB42, C9JDR7, C9JDX6, C9JN01, E9PH18, F8WCZ4, O75190, Q49A72, Q75MP3]	10049
			3.20811	0			2.Plasma Membrane	2.Plasma Membrane, 3.Intra Cellular	0.31171	1	6	ENSG00000088538	GENE-protein_coding	1795	DOCK3	DOCK3		false	1795	315	0	1	ASSOCIATED_NEW_GENE	0	0.99299	false	0	1795	0	0	[A0A2X0SFH6, A3KMG4, L8E7Q6, Q8IZD9]	1795
			3.81622	0			1.Extracellular	1.Extracellular, 2.Plasma Membrane, 3.Intra Cellular	0.26204	1	6	ENSG00000092964	GENE-processed_transcript,protein_coding,retained_intron	1808	DPYSL2	DPYSL2		false	1808	132	0	1	ASSOCIATED_NEW_GENE	0	0.99106	false	0	1808	0	0	[A0A1C7CYX9, A9CQZ2, A9CQZ4, E5RFU4, Q16555, Q59GB4]	1808
			3.59459	0	Transcription Factor Complex		0.Annotation definition not found in 'Homo Sapiens.properties' file	0.Annotation definition not found in 'Homo Sapiens.properties' file	0.278195	1	4	ENSG00000117505	GENE-processed_transcript,protein_coding	1810	DR1	DR1		false	1810	147	0	1	ASSOCIATED_NEW_GENE	0	0.991763	false	0	1810	0	0	[A0A126LB39, Q01658, Q658N3]	1810
			3.20811	0			1.Extracellular	1.Extracellular, 2.Plasma Membrane, 3.Intra Cellular	0.31171	1	6	ENSG00000096696	GENE-protein_coding,retained_intron	1832	DSP	DSP		false	1832	315	0	1	ASSOCIATED_NEW_GENE	0	0.99299	false	0	1832	0	0	[A0A804HL18, B4DKX6, G1UI31, P15924, Q4LE79]	1832
			3.59459	0			1.Extracellular	1.Extracellular, 2.Plasma Membrane, 3.Intra Cellular	0.278195	1	4	ENSG00000151914	GENE-nonsense_mediated_decay,processed_transcript,protein_coding,retained_intron	667	DST	DST		false	667	147	0	1	ASSOCIATED_NEW_GENE	0	0.991763	false	0	667	0	0	[A0A0U1RQJ2, A0A494C073, A0A494C1D7, A0A494C1U5, A0A7P0T890, B4DGY0, B4DSS9, E7ERX3, E7ETB9, E9PHM6, F6QMI7, F8W9J4, H0YAT7, H0YBX0, H0YC65, H0YC82, L8E8Z4, Q03001, Q5T0V7, Q6P0N6, Q86T18, Q9BSP9]	667
			3.20811	0			3.Intra Cellular	3.Intra Cellular	0.31171	1	6	ENSG00000168393	GENE-nonsense_mediated_decay,processed_transcript,protein_coding,retained_intron	1841	DTYMK	DTYMK		false	1841	315	0	1	ASSOCIATED_NEW_GENE	0	0.99299	false	0	1841	0	0	[A0A024R4E0, G5E9E9, H7BZ20, H7C312, H7C3A4, P23919, Q53F55, Q6FGU2]	1841
			3.20811	0			1.Extracellular	1.Extracellular, 3.Intra Cellular	0.31171	1	6	ENSG00000128951	GENE-nonsense_mediated_decay,processed_transcript,protein_coding,retained_intron	1854	DUT	DUT		false	1854	315	0	1	ASSOCIATED_NEW_GENE	0	0.99299	false	0	1854	0	0	[A0A0C4DGL3, H0YKC5, H0YKI0, H0YMM5, H0YMP1, H0YNJ9, H0YNW5, P33316]	1854
			3.76757	0			3.Intra Cellular	3.Intra Cellular	0.265423	1	6	ENSG00000213123	GENE-nonsense_mediated_decay,processed_transcript,protein_coding,retained_intron	255758	DYNLT2B	DYNLT2B		false	255758	108	0	1	ASSOCIATED_NEW_GENE	0	0.991214	false	0	255758	0	0	[E7ER86, F8WD40, Q8WW35]	255758
			4.24865	0			3.Intra Cellular	3.Intra Cellular	0.235369	1	6	ENSG00000157540	GENE-processed_transcript,protein_coding,retained_intron	1859	DYRK1A	DYRK1A		false	1859	48	0	1	ASSOCIATED_NEW_GENE	0	0.989687	false	0	1859	0	0	[A0A2R8Y443, A0A2R8Y6I6, A0A2R8Y6L5, A0A2R8YDF3, A0A2R8YEY4, E7EMI5, N0GVR9, Q13627]	1859
			3.20811	0	Transcription Factor Complex		5.Nucleus	5.Nucleus	0.31171	1	6	ENSG00000133740	GENE-nonsense_mediated_decay,protein_coding,retained_intron	1875	E2F5	E2F5		false	1875	315	0	1	ASSOCIATED_NEW_GENE	0	0.99299	false	0	1875	0	0	[C9JYE9, E5RHD4, H0YBK0, H0YBW8, Q15329]	1875
			3.20811	0			3.Intra Cellular	3.Intra Cellular	0.31171	1	6	ENSG00000122882	GENE-nonsense_mediated_decay,processed_transcript,protein_coding	11319	ECD	ECD		false	11319	315	0	1	ASSOCIATED_NEW_GENE	0	0.99299	false	0	11319	0	0	[C9J316, C9JGV1, F2Z2R1, O95905, S4R458]	11319
			4.24865	0			3.Intra Cellular	3.Intra Cellular	0.235369	1	6	ENSG00000179151	GENE-nonsense_mediated_decay,processed_transcript,protein_coding,retained_intron	80153	EDC3	EDC3		false	80153	48	0	1	ASSOCIATED_NEW_GENE	0	0.989687	false	0	80153	0	0	[H3BMB8, H3BNJ7, H3BPN4, H3BPW9, H3BQ37, H3BQA1, H3BQP5, H3BSQ0, H3BTD6, H3BTF8, H3BTH0, H3BU87, Q96F86]	80153
			4.24865	0			3.Intra Cellular	3.Intra Cellular, 5.Nucleus	0.235369	1	6	ENSG00000107223	GENE-protein_coding	8721	EDF1	EDF1		false	8721	48	0	1	ASSOCIATED_NEW_GENE	0	0.989687	false	0	8721	0	0	[A0A024R8F8, O60869]	8721
			4.24865	0			1.Extracellular	1.Extracellular, 2.Plasma Membrane, 3.Intra Cellular	0.235369	1	6	ENSG00000167658	GENE-processed_transcript,protein_coding,retained_intron	1938	EEF2	EEF2		false	1938	48	0	1	ASSOCIATED_NEW_GENE	0	0.989687	false	0	1938	0	0	[A0A384N6H1, M0R0I6, P13639, Q6PK56]	1938
			3.20811	0			1.Extracellular	1.Extracellular, 2.Plasma Membrane, 3.Intra Cellular	0.31171	1	6	ENSG00000090776	GENE-protein_coding	1947	EFNB1	EFNB1		false	1947	315	0	1	ASSOCIATED_NEW_GENE	0	0.99299	false	0	1947	0	0	[P98172]	1947
			3.76757	0			1.Extracellular	1.Extracellular, 2.Plasma Membrane, 3.Intra Cellular, 4.Nuclear Membrane	0.265423	1	6	ENSG00000146648	GENE-processed_transcript,protein_coding,retained_intron	1956	EGFR	EGFR		false	1956	108	0	1	ASSOCIATED_NEW_GENE	0	0.991214	false	0	1956	0	0	[A0A068JCC9, A0A068JD88, A0A1Y0DMK7, A0A7S9GFS3, A2VCQ7, A7VMV4, A7VN05, A7VN06, A7VN07, B6RC65, B6RC66, B7Z2I3, C9JYS6, E2I6F5, E7BSV0, E9PFD7, F1JTL6, F2YGG7, G9MC26, G9MC81, I3WA68, I3WA72, I3WA73, L0R6G1, P00533, Q147T7, Q30BI0, Q4H1F3, Q504U8, Q68GS6, Q75MF2, Q8NDU8, Q8WZA5, Q9H3C8, Q9H3D0]	1956
			3.59459	0			3.Intra Cellular	3.Intra Cellular	0.278195	1	4	ENSG00000269858	GENE-protein_coding,retained_intron	112398	EGLN2	EGLN2		false	112398	147	0	1	ASSOCIATED_NEW_GENE	0	0.991763	false	0	112398	0	0	[A0A024R0R2, A0A0C4DGR4, L8EAM8, M0QXM8, M0QXR0, M0R035, M0R0Z6, M0R110, M0R1A3, M0R1L0, M0R1W4, M0R2X9, M0R350, Q96KS0]	112398
			3.20811	0			1.Extracellular	1.Extracellular, 2.Plasma Membrane, 3.Intra Cellular	0.31171	1	6	ENSG00000110047	GENE-processed_transcript,protein_coding,retained_intron	10938	EHD1	EHD1		false	10938	315	0	1	ASSOCIATED_NEW_GENE	0	0.99299	false	0	10938	0	0	[A0A024R571, B2R5U3, C9IZH1, C9J2Z4, C9JC03, C9JDQ8, C9JIJ3, Q9H4M9]	10938
			3.81622	0			3.Intra Cellular	3.Intra Cellular	0.26204	1	6	ENSG00000184110	GENE-processed_transcript,protein_coding,retained_intron	8663	EIF3C	EIF3C		false	8663	132	0	1	ASSOCIATED_NEW_GENE	0	0.99106	false	0	8663	0	0	[A0A024QYU9, A1KYQ7, B3KNZ4, B4DDN4, B4DRU0, B4DVQ5, B4DVU3, B4E2Z6, H3BPE3, H3BPE4, H3BTY8, Q3B7B9, Q99613]	8663
			3.81622	0			3.Intra Cellular	3.Intra Cellular	0.26204	1	6	ENSG00000130811	GENE-nonsense_mediated_decay,processed_transcript,protein_coding,retained_intron	8666	EIF3G	EIF3G		false	8666	132	0	1	ASSOCIATED_NEW_GENE	0	0.99106	false	0	8666	0	0	[A8K5K5, K7EL20, K7EL60, K7ENA8, K7ENH0, K7EP16, K7ER90, K7ERL8, O75821, Q6IAM0]	8666
			4.24865	0			3.Intra Cellular	3.Intra Cellular, 5.Nucleus	0.235369	1	6	ENSG00000141543	GENE-protein_coding,retained_intron	9775	EIF4A3	EIF4A3		false	9775	48	0	1	ASSOCIATED_NEW_GENE	0	0.989687	false	0	9775	0	0	[A0A024R8W0, I3L3H2, P38919]	9775
			3.20811	0			3.Intra Cellular	3.Intra Cellular	0.31171	1	6	ENSG00000114867	GENE-nonsense_mediated_decay,protein_coding,retained_intron	1981	EIF4G1	EIF4G1		false	1981	315	0	1	ASSOCIATED_NEW_GENE	0	0.99299	false	0	1981	0	0	[A0A6Q8PFB2, A0A6Q8PG29, A0A7I2Y1C3, B2RU06, B2RU10, B4DSI9, C9J2Z7, C9J556, C9J6B6, C9J987, C9JF13, C9JHW9, C9JIH5, C9JSU8, C9JWH7, C9JWH9, C9JWW9, C9K073, E7EUU4, E7EX73, E9PGM1, F8WB97, F8WCF2, H7C044, H7C0V6, O95065, Q04637, Q4LE58, Q96I65]	1981
			3.59459	0			3.Intra Cellular	3.Intra Cellular	0.278195	1	4	ENSG00000075151	GENE-nonsense_mediated_decay,processed_transcript,protein_coding,retained_intron	8672	EIF4G3	EIF4G3		false	8672	147	0	1	ASSOCIATED_NEW_GENE	0	0.991763	false	0	8672	0	0	[A0A0A0MSA7, A0A0U1RQK7, A0A7P0T858, A0A7P0TB42, A0A7P0TBQ8, A0A804HJV5, B1AN91, B1AN92, O43432, Q59GJ0]	8672
			5.45946	0			3.Intra Cellular	3.Intra Cellular	0.183168	1	6	ENSG00000012660	GENE-processed_transcript,protein_coding	60481	ELOVL5	ELOVL5		false	60481	25	0	1	ASSOCIATED_NEW_GENE	0	0.985843	false	0	60481	0	0	[A0A024RD35, A0A024RD61, A0A0A0MTI6, B3KWH9, Q9NYP7]	60481
			3.76757	0			1.Extracellular	1.Extracellular, 3.Intra Cellular	0.265423	1	6	ENSG00000186998	GENE-nonsense_mediated_decay,processed_transcript,protein_coding,retained_intron	129080	EMID1	EMID1		false	129080	108	0	1	ASSOCIATED_NEW_GENE	0	0.991214	false	0	129080	0	0	[B0QYK2, B0QYK3, B0QYK4, B0QYK5, F8WDX7, H0Y6W4, Q96A84]	129080
			3.20811	0			2.Plasma Membrane	2.Plasma Membrane	0.31171	1	6	ENSG00000134531	GENE-processed_transcript,protein_coding,retained_intron	2012	EMP1	EMP1		false	2012	315	0	1	ASSOCIATED_NEW_GENE	0	0.99299	false	0	2012	0	0	[A0A024RAT0, F5GYV0, F5H2P5, F5H397, J3KQX4, P54849, Q8WWD6]	2012
			4.24865	0			1.Extracellular	1.Extracellular, 2.Plasma Membrane, 3.Intra Cellular	0.235369	1	6	ENSG00000111674	GENE-nonsense_mediated_decay,processed_transcript,protein_coding,retained_intron	2026	ENO2	ENO2		false	2026	48	0	1	ASSOCIATED_NEW_GENE	0	0.989687	false	0	2026	0	0	[F5H0C8, F5H1C3, P09104, Q6FHV6, U3KQP4, U3KQQ1]	2026
			3.59459	0			1.Extracellular	1.Extracellular, 2.Plasma Membrane, 3.Intra Cellular	0.278195	1	4	ENSG00000197594	GENE-nonsense_mediated_decay,processed_transcript,protein_coding,retained_intron	5167	ENPP1	ENPP1		false	5167	147	0	1	ASSOCIATED_NEW_GENE	0	0.991763	false	0	5167	0	0	[A0A3B3ISN7, A0A3B3IST7, A0A3B3IU14, E9PE72, P22413]	5167
			3.81622	0			3.Intra Cellular	3.Intra Cellular	0.26204	1	6	ENSG00000163378	GENE-nonsense_mediated_decay,protein_coding,retained_intron	285203	EOGT	EOGT		false	285203	132	0	1	ASSOCIATED_NEW_GENE	0	0.99106	false	0	285203	0	0	[C9J4G5, C9JQM7, F5H225, Q5NDL2, Q8N329]	285203
			3.20811	0			1.Extracellular	1.Extracellular, 2.Plasma Membrane, 3.Intra Cellular	0.31171	1	6	ENSG00000079819	GENE-processed_transcript,protein_coding,retained_intron	2037	EPB41L2	EPB41L2		false	2037	315	0	1	ASSOCIATED_NEW_GENE	0	0.99299	false	0	2037	0	0	[A0A2R8Y5B3, B4DJ76, E9PHY5, E9PIG0, E9PII3, E9PJP4, E9PK52, E9PMG5, E9PMV8, E9PN54, E9PPC9, E9PQD2, E9PQN0, E9PRG1, H0Y5B0, I6L9B1, O43491, Q59FD8, Q6R5J7, Q6ZSX4, Q9H1C6]	2037
			3.20811	0			2.Plasma Membrane	2.Plasma Membrane	0.31171	1	6	ENSG00000142627	GENE-processed_transcript,protein_coding	1969	EPHA2	EPHA2		false	1969	315	0	1	ASSOCIATED_NEW_GENE	0	0.99299	false	0	1969	0	0	[A0A024QZA8, P29317, Q8IZL0, Q96HF4]	1969
			3.20811	0			2.Plasma Membrane	2.Plasma Membrane, 3.Intra Cellular	0.31171	1	6	ENSG00000145242	GENE-protein_coding	2044	EPHA5	EPHA5		false	2044	315	0	1	ASSOCIATED_NEW_GENE	0	0.99299	false	0	2044	0	0	[A0A384MU00, B7ZKJ3, B7ZKW7, F8VP57, F8W9W0, P54756, Q59FT4]	2044
			3.81622	0			3.Intra Cellular	3.Intra Cellular	0.26204	1	6	ENSG00000178567	GENE-protein_coding	9852	EPM2AIP1	EPM2AIP1		false	9852	132	0	1	ASSOCIATED_NEW_GENE	0	0.99106	false	0	9852	0	0	[A0A096LNL1, A0A096LPB0, Q7L775]	9852
			3.20811	0			3.Intra Cellular	3.Intra Cellular	0.31171	1	6	ENSG00000107566	GENE-protein_coding	10613	ERLIN1	ERLIN1		false	10613	315	0	1	ASSOCIATED_NEW_GENE	0	0.99299	false	0	10613	0	0	[B0QZ43, O75477]	10613
			3.20811	0			2.Plasma Membrane	2.Plasma Membrane, 3.Intra Cellular	0.31171	1	6	ENSG00000147475	GENE-processed_transcript,protein_coding,retained_intron	11160	ERLIN2	ERLIN2		false	11160	315	0	1	ASSOCIATED_NEW_GENE	0	0.99299	false	0	11160	0	0	[A0A384ME54, E5RHW4, E5RJ09, O94905]	11160
			4.24865	0			2.Plasma Membrane	2.Plasma Membrane, 3.Intra Cellular, 5.Nucleus	0.235369	1	6	ENSG00000139083	GENE-processed_transcript,protein_coding	2120	ETV6	ETV6		false	2120	48	0	1	ASSOCIATED_NEW_GENE	0	0.989687	false	0	2120	0	0	[A0A0S2Z3C9, A0A0S2Z3N6, H0YG25, J3KN52, P41212, Q1XE77, Q9UBM2, Q9UME7]	2120
			3.20811	0			0.Annotation definition not found in 'Homo Sapiens.properties' file	0.Annotation definition not found in 'Homo Sapiens.properties' file	0.31171	1	6	ENSG00000142459	GENE-processed_transcript,protein_coding,retained_intron	115704	EVI5L	EVI5L		false	115704	315	0	1	ASSOCIATED_NEW_GENE	0	0.99299	false	0	115704	0	0	[A0A384MR55, M0QYX4, M0R1Y1, Q96CN4]	115704
			3.81622	0			3.Intra Cellular	3.Intra Cellular	0.26204	1	6	ENSG00000157036	GENE-nonsense_mediated_decay,protein_coding,retained_intron	9941	EXOG	EXOG		false	9941	132	0	1	ASSOCIATED_NEW_GENE	0	0.99106	false	0	9941	0	0	[F2Z2D3, F8WC11, F8WE28, F8WE38, F8WEP0, H0Y8P1, H7C0W6, H7C451, Q9Y2C4]	9941
			3.59459	0			3.Intra Cellular	3.Intra Cellular, 5.Nucleus	0.278195	1	4	ENSG00000130713	GENE-nonsense_mediated_decay,processed_transcript,protein_coding,retained_intron	23404	EXOSC2	EXOSC2		false	23404	147	0	1	ASSOCIATED_NEW_GENE	0	0.991763	false	0	23404	0	0	[A2VCR1, A3KFL1, A3KFL2, A3KFL5, B3KQW2, Q13868]	23404
			3.20811	0			1.Extracellular	1.Extracellular, 3.Intra Cellular	0.31171	1	6	ENSG00000151348	GENE-nonsense_mediated_decay,processed_transcript,protein_coding,retained_intron	2132	EXT2	EXT2		false	2132	315	0	1	ASSOCIATED_NEW_GENE	0	0.99299	false	0	2132	0	0	[A0A804HHX4, A0A804HIU8, A0A804HJW9, A0A804HKG2, A0A804HKG8, A0A804HL74, A0A804HLF7, D3DR24, Q6NUL1, Q93063]	2132
			3.20811	0			1.Extracellular	1.Extracellular, 3.Intra Cellular	0.31171	1	6	ENSG00000103876	GENE-nonsense_mediated_decay,processed_transcript,protein_coding,retained_intron	2184	FAH	FAH		false	2184	315	0	1	ASSOCIATED_NEW_GENE	0	0.99299	false	0	2184	0	0	[A0A384P5L6, A0A804HJ13, A0A804HJX2, B7Z4W2, H0YLC7, H3BNP8, P16930]	2184
			3.81622	0			3.Intra Cellular	3.Intra Cellular	0.26204	1	6	ENSG00000197712	GENE-processed_transcript,protein_coding,retained_intron	92689	FAM114A1	FAM114A1		false	92689	132	0	1	ASSOCIATED_NEW_GENE	0	0.99106	false	0	92689	0	0	[A1MMZ0, D6R9C9, Q8IWE2]	92689
			3.76757	0			0.Annotation definition not found in 'Homo Sapiens.properties' file	0.Annotation definition not found in 'Homo Sapiens.properties' file	0.265423	1	6	ENSG00000184083	GENE-processed_transcript,protein_coding	54954	FAM120C	FAM120C		false	54954	108	0	1	ASSOCIATED_NEW_GENE	0	0.991214	false	0	54954	0	0	[F8W881, Q642I8, Q9NX05]	54954
			3.59459	0			3.Intra Cellular	3.Intra Cellular	0.278195	1	4	ENSG00000031003	GENE-protein_coding,retained_intron	51306	FAM13B	FAM13B		false	51306	147	0	1	ASSOCIATED_NEW_GENE	0	0.991763	false	0	51306	0	0	[A0A2X0SG06, D6RAT6, D6RBJ3, D6RCA0, D6RDL7, D6RE97, Q9NYF5]	51306
			4.24865	0			0.Annotation definition not found in 'Homo Sapiens.properties' file	0.Annotation definition not found in 'Homo Sapiens.properties' file	0.235369	1	6	ENSG00000161682	GENE-nonsense_mediated_decay,protein_coding,retained_intron	284069	FAM171A2	FAM171A2		false	284069	48	0	1	ASSOCIATED_NEW_GENE	0	0.989687	false	0	284069	0	0	[A8MVW0, K7EMG4, Q8N0U1]	284069
			3.59459	0			0.Annotation definition not found in 'Homo Sapiens.properties' file	0.Annotation definition not found in 'Homo Sapiens.properties' file	0.278195	1	4	ENSG00000005238	GENE-processed_transcript,protein_coding	80256	FAM214B	FAM214B		false	80256	147	0	1	ASSOCIATED_NEW_GENE	0	0.991763	false	0	80256	0	0	[Q7L5A3]	80256
			3.59459	0			0.Annotation definition not found in 'Homo Sapiens.properties' file	0.Annotation definition not found in 'Homo Sapiens.properties' file	0.278195	1	4	ENSG00000203778	GENE-protein_coding	619208	FAM229B	FAM229B		false	619208	147	0	1	ASSOCIATED_NEW_GENE	0	0.991763	false	0	619208	0	0	[Q4G0N7]	619208
			3.20811	0			1.Extracellular	1.Extracellular, 3.Intra Cellular	0.31171	1	6	ENSG00000196937	GENE-protein_coding,retained_intron	10447	FAM3C	FAM3C		false	10447	315	0	1	ASSOCIATED_NEW_GENE	0	0.99299	false	0	10447	0	0	[C9JMN4, C9JP35, Q92520]	10447
			3.59459	0			0.Annotation definition not found in 'Homo Sapiens.properties' file	0.Annotation definition not found in 'Homo Sapiens.properties' file	0.278195	1	4	ENSG00000133477	GENE-processed_transcript,protein_coding	113828	FAM83F	FAM83F		false	113828	147	0	1	ASSOCIATED_NEW_GENE	0	0.991763	false	0	113828	0	0	[Q8NEG4]	113828
			3.81622	0			0.Annotation definition not found in 'Homo Sapiens.properties' file	0.Annotation definition not found in 'Homo Sapiens.properties' file	0.26204	1	6	ENSG00000182118	GENE-processed_transcript,protein_coding	375061	FAM89A	FAM89A		false	375061	132	0	1	ASSOCIATED_NEW_GENE	0	0.99106	false	0	375061	0	0	[Q96GI7]	375061
			4.24865	0			3.Intra Cellular	3.Intra Cellular	0.235369	1	6	ENSG00000137414	GENE-nonsense_mediated_decay,protein_coding,retained_intron	51439	FAM8A1	FAM8A1		false	51439	48	0	1	ASSOCIATED_NEW_GENE	0	0.989687	false	0	51439	0	0	[A0A024R006, Q9UBU6]	51439
			3.59459	0			0.Annotation definition not found in 'Homo Sapiens.properties' file	0.Annotation definition not found in 'Homo Sapiens.properties' file	0.278195	1	4	ENSG00000187268	GENE-protein_coding,retained_intron	171484	FAM9C	FAM9C		false	171484	147	0	1	ASSOCIATED_NEW_GENE	0	0.991763	false	0	171484	0	0	[A0A024RBW5, G3V1I3, H7C346, Q8IZT9]	171484
			3.59459	0			3.Intra Cellular	3.Intra Cellular, 5.Nucleus	0.278195	1	4	ENSG00000162458	GENE-processed_transcript,protein_coding	54751	FBLIM1	FBLIM1		false	54751	147	0	1	ASSOCIATED_NEW_GENE	0	0.991763	false	0	54751	0	0	[D6R9I4, D6R9V9, D6RA19, D6RAI6, D6RAI8, E7EN81, E7EPI5, E7EWE8, Q5VVD3, Q8WUP2]	54751
			3.76757	0			1.Extracellular	1.Extracellular, 3.Intra Cellular	0.265423	1	6	ENSG00000166147	GENE-nonsense_mediated_decay,processed_transcript,protein_coding,retained_intron	2200	FBN1	FBN1		false	2200	108	0	1	ASSOCIATED_NEW_GENE	0	0.991214	false	0	2200	0	0	[A0A1B1PFX5, A0A6I8PL22, F6U495, H0YN80, H0YND0, L8E6V0, L8E775, P35555, Q75N88, Q75N89]	2200
			3.59459	0			1.Extracellular	1.Extracellular, 2.Plasma Membrane, 3.Intra Cellular	0.278195	1	4	ENSG00000162747	GENE-protein_coding,retained_intron	2215	FCGR3B	FCGR3B		false	2215	147	0	1	ASSOCIATED_NEW_GENE	0	0.991763	false	0	2215	0	0	[A0A087WU90, A0A087WZR4, A0A3B3ISU3, A0A5A4UD02, E9PNY5, H0Y4U3, O75015]	2215
			3.20811	0			3.Intra Cellular	3.Intra Cellular, 5.Nucleus	0.31171	1	6	ENSG00000168496	GENE-protein_coding	2237	FEN1	FEN1		false	2237	315	0	1	ASSOCIATED_NEW_GENE	0	0.99299	false	0	2237	0	0	[B4DWZ4, F5H1Y3, I3L3E9, P39748, Q6FHX6]	2237
			3.81622	0			1.Extracellular	1.Extracellular, 2.Plasma Membrane, 3.Intra Cellular	0.26204	1	6	ENSG00000068078	GENE-nonsense_mediated_decay,processed_transcript,protein_coding,retained_intron	2261	FGFR3	FGFR3		false	2261	132	0	1	ASSOCIATED_NEW_GENE	0	0.99106	false	0	2261	0	0	[A0A3S5WLI4, A0A3S5XAL5, A0A5P8NAS4, A0A7I2RW32, A0N9W0, A8E633, F8W9L4, I6LM06, P22607, Q0IJ44, Q8NI15, Q8NI16, Q96T34, Q96T35, Q96T36, Q9NRB6, X5D2G8, X5D2W2, X5D9H5]	2261
			3.20811	0			1.Extracellular	1.Extracellular, 3.Intra Cellular	0.31171	1	6	ENSG00000091483	GENE-nonsense_mediated_decay,processed_transcript,protein_coding,retained_intron	2271	FH	FH		false	2271	315	0	1	ASSOCIATED_NEW_GENE	0	0.99299	false	0	2271	0	0	[A0A0S2Z3S9, A0A0S2Z3W2, A0A0S2Z3X6, A0A0S2Z408, A0A0S2Z4C3, A0A0S2Z4H0, A0A804HI24, A0A804HKE6, A0A804HL52, P07954, Q7Z6G0]	2271
			3.76757	0			0.Annotation definition not found in 'Homo Sapiens.properties' file	0.Annotation definition not found in 'Homo Sapiens.properties' file	0.265423	1	6	ENSG00000151553	GENE-protein_coding	57700	FHIP2A	FHIP2A		false	57700	108	0	1	ASSOCIATED_NEW_GENE	0	0.991214	false	0	57700	0	0	[Q5W0V1, Q5W0V3, Q5W0V4]	57700
			3.20811	0			3.Intra Cellular	3.Intra Cellular	0.31171	1	6	ENSG00000198855	GENE-processed_transcript,protein_coding	11153	FICD	FICD		false	11153	315	0	1	ASSOCIATED_NEW_GENE	0	0.99299	false	0	11153	0	0	[A0A024RBM8, F8VZ74, H0YIR6, J3KP49, Q9BVA6]	11153
			3.59459	0			3.Intra Cellular	3.Intra Cellular	0.278195	1	4	ENSG00000217128	GENE-TEC,protein_coding	96459	FNIP1	FNIP1		false	96459	147	0	1	ASSOCIATED_NEW_GENE	0	0.991763	false	0	96459	0	0	[A0A087WX11, J3KNG8, Q8TF40]	96459
			3.20811	0	Transcription Factor Complex		2.Plasma Membrane	2.Plasma Membrane, 3.Intra Cellular	0.31171	1	6	ENSG00000175592	GENE-protein_coding	8061	FOSL1	FOSL1		false	8061	315	0	1	ASSOCIATED_NEW_GENE	0	0.99299	false	0	8061	0	0	[A0A0S2Z595, E9PKL5, E9PPX2, E9PQT6, P15407]	8061
			3.76757	0	Transcription Factor Complex		0.Annotation definition not found in 'Homo Sapiens.properties' file	0.Annotation definition not found in 'Homo Sapiens.properties' file	0.265423	1	6	ENSG00000075426	GENE-processed_transcript,protein_coding	2355	FOSL2	FOSL2		false	2355	108	0	1	ASSOCIATED_NEW_GENE	0	0.991214	false	0	2355	0	0	[C9JCN8, P15408, Q9H5M2]	2355
			3.81622	0			0.Annotation definition not found in 'Homo Sapiens.properties' file	0.Annotation definition not found in 'Homo Sapiens.properties' file	0.26204	1	6	ENSG00000198815	GENE-protein_coding	22887	FOXJ3	FOXJ3		false	22887	132	0	1	ASSOCIATED_NEW_GENE	0	0.99106	false	0	22887	0	0	[C9JVP0, C9JXI1, F6VXT0, H7C1Y6, Q9UPW0]	22887
			3.81622	0			3.Intra Cellular	3.Intra Cellular	0.26204	1	6	ENSG00000141568	GENE-TEC,nonsense_mediated_decay,processed_transcript,protein_coding,retained_intron	3607	FOXK2	FOXK2		false	3607	132	0	1	ASSOCIATED_NEW_GENE	0	0.99106	false	0	3607	0	0	[E9PM37, E9PPI7, I3L4U8, Q01167]	3607
			5.45946	0			2.Plasma Membrane	2.Plasma Membrane, 3.Intra Cellular	0.183168	1	6	ENSG00000111206	GENE-nonsense_mediated_decay,processed_transcript,protein_coding,retained_intron	2305	FOXM1	FOXM1		false	2305	25	0	1	ASSOCIATED_NEW_GENE	0	0.985843	false	0	2305	0	0	[A0A0D9SFF0, A0A2P9DTZ0, A0A2P9DTZ1, A0A2P9DTZ8, A8K591, H0YG99, H0YGS4, Q08050, Q53Y49]	2305
			3.20811	0			3.Intra Cellular	3.Intra Cellular	0.31171	1	6	ENSG00000114861	GENE-nonsense_mediated_decay,processed_transcript,protein_coding,retained_intron	27086	FOXP1	FOXP1		false	27086	315	0	1	ASSOCIATED_NEW_GENE	0	0.99299	false	0	27086	0	0	[A0A087WVT2, A0A087X2G3, A0A0B4J2F3, A0A3B3IRL7, A0A3B3IRS5, A0A3B3IRW5, A0A3B3IRY1, A0A3B3IS87, A0A3B3ISA4, A0A3B3ISQ3, A0A3B3ISQ6, A0A3B3ISQ7, A0A3B3IST0, A0A3B3IST6, A0A3B3IT14, A0A3B3IT26, A0A3B3IT66, A0A3B3ITZ4, A0A3B3IU08, A0A3B3IU15, A0A3B3IUB6, A3KMG1, C9IYY1, C9J0F0, C9J5T4, G5E965, H0Y882, Q548T7, Q6IAJ1, Q8N2P0, Q8TEA2, Q9H334]	27086
			3.81622	0			3.Intra Cellular	3.Intra Cellular	0.26204	1	6	ENSG00000073910	GENE-nonsense_mediated_decay,processed_transcript,protein_coding,retained_intron	10129	FRY	FRY		false	10129	132	0	1	ASSOCIATED_NEW_GENE	0	0.99106	false	0	10129	0	0	[A0A024RDQ1, A0A286YFA9, A0A2R8Y5V8, A0A2R8Y7Y8, A0A2R8YCY2, B1ALA1, H0YE00, L8EB55, Q5TBA9]	10129
			3.76757	0			1.Extracellular	1.Extracellular, 2.Plasma Membrane, 3.Intra Cellular	0.265423	1	6	ENSG00000075618	GENE-protein_coding,retained_intron	6624	FSCN1	FSCN1		false	6624	108	0	1	ASSOCIATED_NEW_GENE	0	0.991214	false	0	6624	0	0	[A0A0A0MSB2, A0A384MEG1, B3KTA3, C9JFC0, C9JPH9, Q16658]	6624
			3.76757	0			1.Extracellular	1.Extracellular, 3.Intra Cellular	0.265423	1	6	ENSG00000087086	GENE-protein_coding	2512	FTL	FTL		false	2512	108	0	1	ASSOCIATED_NEW_GENE	0	0.991214	false	0	2512	0	0	[A0A384MDR3, B1Q387, B1Q3B3, B1Q3B4, M1KCE4, P02792, Q4FCH6, Q6DMM8, Q6S4P3]	2512
			3.59459	0			3.Intra Cellular	3.Intra Cellular	0.278195	1	4	ENSG00000196371	GENE-protein_coding	2526	FUT4	FUT4		false	2526	147	0	1	ASSOCIATED_NEW_GENE	0	0.991763	false	0	2526	0	0	[P22083]	2526
			3.20811	0			1.Extracellular	1.Extracellular, 3.Intra Cellular	0.31171	1	6	ENSG00000033170	GENE-nonsense_mediated_decay,processed_transcript,protein_coding	2530	FUT8	FUT8		false	2530	315	0	1	ASSOCIATED_NEW_GENE	0	0.99299	false	0	2530	0	0	[A0A669KAW1, A5PLL2, A8K8P8, G3V443, G3V4A8, G3V509, G3V530, G3V5E3, G3V5Z4, G3XAD2, Q546E0, Q9BYC5]	2530
			3.59459	0			2.Plasma Membrane	2.Plasma Membrane, 3.Intra Cellular	0.278195	1	4	ENSG00000113327	GENE-nonsense_mediated_decay,processed_transcript,protein_coding,retained_intron	2566	GABRG2	GABRG2		false	2566	147	0	1	ASSOCIATED_NEW_GENE	0	0.991763	false	0	2566	0	0	[A0A1W2PP56, A0A1W2PPN5, A0A1W2PPS4, A0A1W2PQ81, A0A1W2PQA6, A0A1W2PQR9, A0A1W2PQX1, A0A1W2PR49, A0A1W2PRM8, A0A1W2PRN4, A0A1W2PRU1, A0A1W2PRY3, A0A1W2PSF4, A0A1X7SBS5, A0A1X7SBZ8, A0A286YFI6, A8MWU7, E5RGJ0, E5RIG3, P18507]	2566
			3.20811	0			1.Extracellular	1.Extracellular, 3.Intra Cellular	0.31171	1	6	ENSG00000109586	GENE-processed_transcript,protein_coding,retained_intron	51809	GALNT7	GALNT7		false	51809	315	0	1	ASSOCIATED_NEW_GENE	0	0.99299	false	0	51809	0	0	[E9PBY3, H0YAH3, H0YAK0, Q4W5F7, Q68VJ4, Q86SF2]	51809
			3.59459	0			1.Extracellular	1.Extracellular	0.278195	1	4	ENSG00000197487	GENE-protein_coding	85569	GALP	GALP		false	85569	147	0	1	ASSOCIATED_NEW_GENE	0	0.991763	false	0	85569	0	0	[Q9UBC7]	85569
			3.81622	0			3.Intra Cellular	3.Intra Cellular	0.26204	1	6	ENSG00000261609	GENE-nonsense_mediated_decay,processed_transcript,protein_coding,retained_intron	8139	GAN	GAN		false	8139	132	0	1	ASSOCIATED_NEW_GENE	0	0.99106	false	0	8139	0	0	[A0A0S2Z4W2, A0A0S2Z5G5, A0A3B3ITY2, B3KTC3, Q9H2C0]	8139
			3.20811	0			2.Plasma Membrane	2.Plasma Membrane	0.31171	1	6	ENSG00000180447	GENE-protein_coding	2619	GAS1	GAS1		false	2619	315	0	1	ASSOCIATED_NEW_GENE	0	0.99299	false	0	2619	0	0	[P54826]	2619
			3.20811	0	Transcription Factor Complex		0.Annotation definition not found in 'Homo Sapiens.properties' file	0.Annotation definition not found in 'Homo Sapiens.properties' file	0.31171	1	6	ENSG00000136574	GENE-protein_coding,retained_intron	2626	GATA4	GATA4		false	2626	315	0	1	ASSOCIATED_NEW_GENE	0	0.99299	false	0	2626	0	0	[A0A087WZ09, A9Z1I4, B0LXE8, B0LXE9, B0LXF0, B0LXF1, B0LXF2, B0LXF3, B0LXF4, B0LXF5, B0LXF6, B2ZBW1, B2ZBW2, B3KUF4, B6DU75, E9PKS4, P43694, R4GND5]	2626
			3.20811	0			3.Intra Cellular	3.Intra Cellular	0.31171	1	6	ENSG00000203879	GENE-nonsense_mediated_decay,processed_transcript,protein_coding,retained_intron	2664	GDI1	GDI1		false	2664	315	0	1	ASSOCIATED_NEW_GENE	0	0.99299	false	0	2664	0	0	[A0A0S2Z3X8, A0A0S2Z426, F8WCU0, F8WE59, G5E9U5, L8EC88, P31150]	2664
			3.20811	0	Transcription Factor Complex		3.Intra Cellular	3.Intra Cellular	0.31171	1	6	ENSG00000082516	GENE-protein_coding,retained_intron	25929	GEMIN5	GEMIN5		false	25929	315	0	1	ASSOCIATED_NEW_GENE	0	0.99299	false	0	25929	0	0	[B7ZLC9, L8E9U3, L8ECG2, Q58EZ8, Q8TEQ6]	25929
			3.81622	0	Transcription Factor Complex		3.Intra Cellular	3.Intra Cellular	0.26204	1	6	ENSG00000182093	GENE-nonsense_mediated_decay,processed_transcript,protein_coding,retained_intron	7485	GET1	GET1		false	7485	132	0	1	ASSOCIATED_NEW_GENE	0	0.99106	false	0	7485	0	0	[A0A096LNK8, A0A096LNT6, A0A3B3ISA8, A0A3B3ISE5, A0A3B3IT79, A0A3B3IUG4, B4DLW3, B7Z1T1, C9JLV3, H7BYE5, H7C384, O00258]	7485
			3.20811	0			1.Extracellular	1.Extracellular, 3.Intra Cellular	0.31171	1	6	ENSG00000198380	GENE-nonsense_mediated_decay,protein_coding	2673	GFPT1	GFPT1		false	2673	315	0	1	ASSOCIATED_NEW_GENE	0	0.99299	false	0	2673	0	0	[A0A6I8PRN4, A0A6I8PRT6, A0A6I8PTT9, Q06210]	2673
			3.59459	0			3.Intra Cellular	3.Intra Cellular	0.278195	1	4	ENSG00000100083	GENE-processed_transcript,protein_coding,retained_intron	26088	GGA1	GGA1		false	26088	147	0	1	ASSOCIATED_NEW_GENE	0	0.991763	false	0	26088	0	0	[B0QYR5, B0QYR6, B0QYR8, B0QYR9, B0QYS0, B0QYS1, B0QYS2, B0QYS3, B0QYS5, Q9UJY5]	26088
			3.20811	0			3.Intra Cellular	3.Intra Cellular	0.31171	1	6	ENSG00000204120	GENE-nonsense_mediated_decay,processed_transcript,protein_coding,retained_intron	26058	GIGYF2	GIGYF2		false	26058	315	0	1	ASSOCIATED_NEW_GENE	0	0.99299	false	0	26058	0	0	[A0A7I2V361, A0A7I2V3H0, A0A7I2V3H7, A0A7I2V3X3, A0A7I2V516, A0A7I2YQP8, C9J0V6, C9JC65, C9JHT0, C9JHW1, C9JPV7, C9JRZ2, C9JW88, C9JXQ0, E7ESB6, F8WBF1, F8WCD5, I1E4Y6, Q6Y7W6]	26058
			3.20811	0			0.Annotation definition not found in 'Homo Sapiens.properties' file	0.Annotation definition not found in 'Homo Sapiens.properties' file	0.31171	1	6	ENSG00000197045	GENE-nonsense_mediated_decay,processed_transcript,protein_coding,retained_intron	2764	GMFB	GMFB		false	2764	315	0	1	ASSOCIATED_NEW_GENE	0	0.99299	false	0	2764	0	0	[G3V3X4, G3V4P8, P60983]	2764
			3.59459	0			3.Intra Cellular	3.Intra Cellular	0.278195	1	4	ENSG00000163655	GENE-processed_transcript,protein_coding	8833	GMPS	GMPS		false	8833	147	0	1	ASSOCIATED_NEW_GENE	0	0.991763	false	0	8833	0	0	[A0A140VJK6, P49915]	8833
			3.59459	0			1.Extracellular	1.Extracellular, 2.Plasma Membrane, 3.Intra Cellular	0.278195	1	4	ENSG00000087460	GENE-nonsense_mediated_decay,processed_transcript,protein_coding,retained_intron	2778	GNAS	GNAS		false	2778	147	0	1	ASSOCIATED_NEW_GENE	0	0.991763	false	0	2778	0	0	[A0A0A0MR13, A0A0S2Z3H8, A0A0S2Z3S5, A0A590UJ46, A0A590UJ47, A0A590UJC9, A0A590UJF0, A0A590UJQ9, A0A590UJS2, A0A590UJX3, A0A590UJX6, A0A590UJY2, A0A590UK00, A0A590UK28, A0A7I2V5R6, A0A804HIH4, A2A2R6, A2A2S1, B0AZR9, H0UI78, H0Y7E8, H0Y7Z6, O95467, P63092, P84996, Q14455, Q5FWY2, Q5JWD1, Q5JWE9, Q5JWF2]	2778
			3.81622	0			2.Plasma Membrane	2.Plasma Membrane, 3.Intra Cellular	0.26204	1	6	ENSG00000069966	GENE-nonsense_mediated_decay,processed_transcript,protein_coding,retained_intron	10681	GNB5	GNB5		false	10681	132	0	1	ASSOCIATED_NEW_GENE	0	0.99106	false	0	10681	0	0	[A0A024R5R9, A0A024R5V3, A0A024R5Y0, H0YLU1, H0YNW7, O14775, Q96F32]	10681
			3.20811	0			1.Extracellular	1.Extracellular, 2.Plasma Membrane, 3.Intra Cellular	0.31171	1	6	ENSG00000113552	GENE-protein_coding,retained_intron	10007	GNPDA1	GNPDA1		false	10007	315	0	1	ASSOCIATED_NEW_GENE	0	0.99299	false	0	10007	0	0	[D6R917, D6R9P4, D6RAY7, D6RB13, D6RFF8, D6RFK5, P46926]	10007
			3.20811	0			3.Intra Cellular	3.Intra Cellular	0.31171	1	6	ENSG00000115806	GENE-nonsense_mediated_decay,processed_transcript,protein_coding,retained_intron	26003	GORASP2	GORASP2		false	26003	315	0	1	ASSOCIATED_NEW_GENE	0	0.99299	false	0	26003	0	0	[F8WBR9, F8WEG2, F8WEH9, F8WF79, Q9H8Y8]	26003
			3.20811	0			1.Extracellular	1.Extracellular, 2.Plasma Membrane, 3.Intra Cellular	0.31171	1	6	ENSG00000105220	GENE-nonsense_mediated_decay,processed_transcript,protein_coding,retained_intron	2821	GPI	GPI		false	2821	315	0	1	ASSOCIATED_NEW_GENE	0	0.99299	false	0	2821	0	0	[A0A0G2JLI6, A0A0J9YX90, A0A0J9YXH9, A0A0J9YXM3, A0A0J9YXP8, A0A0J9YYH3, A0A0J9YYI8, A0A2R8Y6C7, A0A2R8YF08, A0A2U3TZU2, B4DE36, K7EIL4, K7ELR7, K7ENA0, K7EP41, K7EPY4, K7EQ48, K7ERC6, K7ERK8, P06744]	2821
			3.20811	0			2.Plasma Membrane	2.Plasma Membrane	0.31171	1	6	ENSG00000175697	GENE-nonsense_mediated_decay,protein_coding,retained_intron	165829	GPR156	GPR156		false	165829	315	0	1	ASSOCIATED_NEW_GENE	0	0.99299	false	0	165829	0	0	[F8WAW3, Q8NFN8]	165829
			3.59459	0			2.Plasma Membrane	2.Plasma Membrane	0.278195	1	4	ENSG00000151025	GENE-processed_transcript,protein_coding	57512	GPR158	GPR158		false	57512	147	0	1	ASSOCIATED_NEW_GENE	0	0.991763	false	0	57512	0	0	[A0A3B3IUC3, Q5T848]	57512
			3.20811	0			1.Extracellular	1.Extracellular, 2.Plasma Membrane, 3.Intra Cellular, 5.Nucleus	0.31171	1	6	ENSG00000177885	GENE-nonsense_mediated_decay,processed_transcript,protein_coding,retained_intron	2885	GRB2	GRB2		false	2885	315	0	1	ASSOCIATED_NEW_GENE	0	0.99299	false	0	2885	0	0	[B0LPF3, J3KT38, J3QLF6, J3QRL5, P62993, Q6ICN0]	2885
			4.24865	0			0.Annotation definition not found in 'Homo Sapiens.properties' file	0.Annotation definition not found in 'Homo Sapiens.properties' file	0.235369	1	6	ENSG00000134317	GENE-nonsense_mediated_decay,protein_coding,retained_intron	29841	GRHL1	GRHL1		false	29841	48	0	1	ASSOCIATED_NEW_GENE	0	0.989687	false	0	29841	0	0	[B7Z1S6, C9JYY8, F8WFB0, Q9NZI5]	29841
			3.59459	0			2.Plasma Membrane	2.Plasma Membrane, 3.Intra Cellular	0.278195	1	4	ENSG00000183454	GENE-processed_transcript,protein_coding,retained_intron	2903	GRIN2A	GRIN2A		false	2903	147	0	1	ASSOCIATED_NEW_GENE	0	0.991763	false	0	2903	0	0	[A0A1B0GU35, A0A1B0GUT1, A0A1B0GVW1, A0A6Q8PGD2, A0A6Q8PHM7, A0A890YTL4, F5GZ52, Q12879, Q547U9, Q59EW6]	2903
			3.20811	0			3.Intra Cellular	3.Intra Cellular	0.31171	1	6	ENSG00000178719	GENE-protein_coding,retained_intron	2907	GRINA	GRINA		false	2907	315	0	1	ASSOCIATED_NEW_GENE	0	0.99299	false	0	2907	0	0	[E9PPG3, E9PQF8, H0YC98, H0YCP9, H0YEI4, Q7Z429]	2907
			3.20811	0			2.Plasma Membrane	2.Plasma Membrane, 3.Intra Cellular	0.31171	1	6	ENSG00000196277	GENE-nonsense_mediated_decay,processed_transcript,protein_coding,retained_intron	2917	GRM7	GRM7		false	2917	315	0	1	ASSOCIATED_NEW_GENE	0	0.99299	false	0	2917	0	0	[A0A0A0MSC3, B2R693, B7ZKK0, B9EGG9, C9JMT3, C9JU97, F8WAW6, F8WCR9, H7C3K2, L8E797, Q14831, Q59G95]	2917
			3.81622	0			2.Plasma Membrane	2.Plasma Membrane, 3.Intra Cellular	0.26204	1	6	ENSG00000082701	GENE-nonsense_mediated_decay,processed_transcript,protein_coding,retained_intron	2932	GSK3B	GSK3B		false	2932	132	0	1	ASSOCIATED_NEW_GENE	0	0.99106	false	0	2932	0	0	[A0A3B3ITW1, A0A7I2V2I5, A0A7I2V2K7, A0A7I2V2N4, A0A7I2V2T2, A0A7I2V2U4, A0A7I2V2V4, A0A7I2V2Y0, A0A7I2V3A4, A0A7I2V3D8, A0A7I2V3G9, A0A7I2V3J4, A0A7I2V3K8, A0A7I2V3N7, A0A7I2V3S5, A0A7I2V3T3, A0A7I2V3Z5, A0A7I2V432, A0A7I2V441, A0A7I2V4F3, A0A7I2V4G2, A0A7I2V4W7, A0A7I2V4X2, A0A7I2V4X3, A0A7I2V589, A0A7I2V5B5, A0A7I2V5G5, A0A7I2V5K9, A0A7I2V5M2, A0A7I2V5P4, A0A7I2V606, A0A7I2V626, A0A7I2V675, A0…	2932
			3.76757	0			1.Extracellular	1.Extracellular, 3.Intra Cellular	0.265423	1	6	ENSG00000084207	GENE-nonsense_mediated_decay,protein_coding,retained_intron	2950	GSTP1	GSTP1		false	2950	108	0	1	ASSOCIATED_NEW_GENE	0	0.991214	false	0	2950	0	0	[A0A087X243, A0A087X2E9, A0A0M4UT83, A0A0M5MRY8, A0A2P1FDF0, A0A2R8Y5E5, A0A3B6XSH2, A8MX94, B2C310, C7DJS1, C7DJS2, P09211, Q5D6A5, V9HWE9]	2950
			3.20811	0	Transcription Factor Complex		5.Nucleus	5.Nucleus	0.31171	1	6	ENSG00000077235	GENE-nonsense_mediated_decay,processed_transcript,protein_coding,retained_intron	2975	GTF3C1	GTF3C1		false	2975	315	0	1	ASSOCIATED_NEW_GENE	0	0.99299	false	0	2975	0	0	[H3BRD0, H3BU37, H3BU55, I3L1Z3, Q12789, Q7Z7H4]	2975
			3.59459	0			2.Plasma Membrane	2.Plasma Membrane	0.278195	1	4	ENSG00000112599	GENE-protein_coding	2979	GUCA1B	GUCA1B		false	2979	147	0	1	ASSOCIATED_NEW_GENE	0	0.991763	false	0	2979	0	0	[A4FUA1, Q7Z3V9, Q9UMX6]	2979
			3.20811	0			1.Extracellular	1.Extracellular, 3.Intra Cellular	0.31171	1	6	ENSG00000163754	GENE-processed_transcript,protein_coding,retained_intron	2992	GYG1	GYG1		false	2992	315	0	1	ASSOCIATED_NEW_GENE	0	0.99299	false	0	2992	0	0	[C9J7C7, C9J8R8, C9JQ42, G5E9W8, P46976, Q8N5Y3]	2992
			3.20811	0			0.Annotation definition not found in 'Homo Sapiens.properties' file	0.Annotation definition not found in 'Homo Sapiens.properties' file	0.31171	1	6	ENSG00000124610	GENE-protein_coding	3024	H1-1	H1-1		false	3024	315	0	1	ASSOCIATED_NEW_GENE	0	0.99299	false	0	3024	0	0	[Q02539]	3024
			3.20811	0			0.Annotation definition not found in 'Homo Sapiens.properties' file	0.Annotation definition not found in 'Homo Sapiens.properties' file	0.31171	1	6	ENSG00000124575	GENE-protein_coding	3007	H1-3	H1-3		false	3007	315	0	1	ASSOCIATED_NEW_GENE	0	0.99299	false	0	3007	0	0	[P16402]	3007
			3.20811	0			0.Annotation definition not found in 'Homo Sapiens.properties' file	0.Annotation definition not found in 'Homo Sapiens.properties' file	0.31171	1	6	ENSG00000168298	GENE-protein_coding	3008	H1-4	H1-4		false	3008	315	0	1	ASSOCIATED_NEW_GENE	0	0.99299	false	0	3008	0	0	[A3R0T8, P10412]	3008
			3.20811	0			5.Nucleus	5.Nucleus	0.31171	1	6	ENSG00000184357	GENE-protein_coding	3009	H1-5	H1-5		false	3009	315	0	1	ASSOCIATED_NEW_GENE	0	0.99299	false	0	3009	0	0	[P16401]	3009
			3.20811	0			1.Extracellular	1.Extracellular	0.31171	1	6	ENSG00000164508	GENE-protein_coding	221613	H2AC1	H2AC1		false	221613	315	0	1	ASSOCIATED_NEW_GENE	0	0.99299	false	0	221613	0	0	[Q96QV6]	221613
			3.20811	0			1.Extracellular	1.Extracellular	0.31171	1	6	ENSG00000184270	GENE-protein_coding	317772	H2AC21	H2AC21		false	317772	315	0	1	ASSOCIATED_NEW_GENE	0	0.99299	false	0	317772	0	0	[Q8IUE6]	317772
			3.20811	0			1.Extracellular	1.Extracellular	0.31171	1	6	ENSG00000196866	GENE-protein_coding	3013	H2AC7	H2AC7		false	3013	315	0	1	ASSOCIATED_NEW_GENE	0	0.99299	false	0	3013	0	0	[B2R5B6, P20671]	3013
			3.20811	0			1.Extracellular	1.Extracellular	0.31171	1	6	ENSG00000277075	GENE-protein_coding	3012	H2AC8	H2AC8		false	3012	315	0	1	ASSOCIATED_NEW_GENE	0	0.99299	false	0	3012	0	0	[P04908, Q08AJ9]	3012
			4.24865	0			1.Extracellular	1.Extracellular	0.235369	1	6	ENSG00000164032	GENE-processed_transcript,protein_coding,retained_intron	3015	H2AZ1	H2AZ1		false	3015	48	0	1	ASSOCIATED_NEW_GENE	0	0.989687	false	0	3015	0	0	[A0A494C189, P0C0S5]	3015
			3.59459	0			1.Extracellular	1.Extracellular	0.278195	1	4	ENSG00000105968	GENE-protein_coding	94239	H2AZ2	H2AZ2		false	94239	147	0	1	ASSOCIATED_NEW_GENE	0	0.991763	false	0	94239	0	0	[C9J0D1, C9J386, E5RJU1, Q71UI9]	94239
			3.20811	0			2.Plasma Membrane	2.Plasma Membrane	0.31171	1	6	ENSG00000146047	GENE-protein_coding	255626	H2BC1	H2BC1		false	255626	315	0	1	ASSOCIATED_NEW_GENE	0	0.99299	false	0	255626	0	0	[Q96A08]	255626
			3.20811	0			3.Intra Cellular	3.Intra Cellular	0.31171	1	6	ENSG00000276410	GENE-protein_coding	3018	H2BC3	H2BC3		false	3018	315	0	1	ASSOCIATED_NEW_GENE	0	0.99299	false	0	3018	0	0	[P33778]	3018
			3.20811	0			3.Intra Cellular	3.Intra Cellular	0.31171	1	6	ENSG00000196890	GENE-processed_transcript,protein_coding	128312	H2BU1	H2BU1		false	128312	315	0	1	ASSOCIATED_NEW_GENE	0	0.99299	false	0	128312	0	0	[Q8N257]	128312
			3.20811	0			1.Extracellular	1.Extracellular	0.31171	1	6	ENSG00000163041	GENE-processed_transcript,protein_coding,retained_intron	3020	H3-3A	H3-3A		false	3020	315	0	1	ASSOCIATED_NEW_GENE	0	0.99299	false	0	3020	0	0	[A0A590UJJ6, B2R4P9, B4DEB1, P84243]	3020
			3.20811	0			1.Extracellular	1.Extracellular	0.31171	1	6	ENSG00000132475	GENE-processed_transcript,protein_coding,retained_intron	3021	H3-3B	H3-3B		false	3021	315	0	1	ASSOCIATED_NEW_GENE	0	0.99299	false	0	3021	0	0	[B2R4P9, K7EK07, K7EMV3, K7EP01, K7ES00, P84243]	3021
			3.20811	0			1.Extracellular	1.Extracellular	0.31171	1	6	ENSG00000203811	GENE-protein_coding	126961	H3C14	H3C14		false	126961	315	0	1	ASSOCIATED_NEW_GENE	0	0.99299	false	0	126961	0	0	[Q71DI3]	126961
			3.20811	0			1.Extracellular	1.Extracellular	0.31171	1	6	ENSG00000203852	GENE-protein_coding	333932	H3C15	H3C15		false	333932	315	0	1	ASSOCIATED_NEW_GENE	0	0.99299	false	0	333932	0	0	[Q71DI3]	333932
			3.20811	0			1.Extracellular	1.Extracellular	0.31171	1	6	ENSG00000197837	GENE-nonsense_mediated_decay,processed_transcript,protein_coding	121504	H4-16	H4-16		false	121504	315	0	1	ASSOCIATED_NEW_GENE	0	0.99299	false	0	121504	0	0	[B2R4R0, P62805]	121504
			3.76757	0			2.Plasma Membrane	2.Plasma Membrane	0.265423	1	6	ENSG00000099822	GENE-protein_coding	610	HCN2	HCN2		false	610	108	0	1	ASSOCIATED_NEW_GENE	0	0.991214	false	0	610	0	0	[Q9UL51]	610
			3.76757	0			2.Plasma Membrane	2.Plasma Membrane, 3.Intra Cellular	0.265423	1	6	ENSG00000138622	GENE-protein_coding	10021	HCN4	HCN4		false	10021	108	0	1	ASSOCIATED_NEW_GENE	0	0.991214	false	0	10021	0	0	[Q9Y3Q4]	10021
			3.20811	0	Transcription Factor Complex		3.Intra Cellular	3.Intra Cellular	0.31171	1	6	ENSG00000116478	GENE-processed_transcript,protein_coding,retained_intron	3065	HDAC1	HDAC1		false	3065	315	0	1	ASSOCIATED_NEW_GENE	0	0.99299	false	0	3065	0	0	[B5BU61, B5MGH2, Q13547, Q5TEE2, Q6IT96]	3065
			3.20811	0			1.Extracellular	1.Extracellular, 2.Plasma Membrane, 3.Intra Cellular	0.31171	1	6	ENSG00000115677	GENE-processed_transcript,protein_coding,retained_intron	3069	HDLBP	HDLBP		false	3069	315	0	1	ASSOCIATED_NEW_GENE	0	0.99299	false	0	3069	0	0	[A0A024R4E5, B2R5V9, C9J5E5, C9J739, C9JB08, C9JBS3, C9JE93, C9JEJ8, C9JES8, C9JHN6, C9JHS7, C9JHS9, C9JHZ8, C9JIZ1, C9JK79, C9JMQ6, C9JQ82, C9JT62, C9JZI8, H0Y394, H7BZC3, H7C0A4, H7C2D1, H7C3D0, L8ECQ0, Q00341, Q2HJC8, Q96CF6]	3069
			3.20811	0			3.Intra Cellular	3.Intra Cellular	0.31171	1	6	ENSG00000106049	GENE-nonsense_mediated_decay,protein_coding,retained_intron	11112	HIBADH	HIBADH		false	11112	315	0	1	ASSOCIATED_NEW_GENE	0	0.99299	false	0	11112	0	0	[A0A024RA75, F8WET2, H7BZL2, P31937]	11112
			3.59459	0			0.Annotation definition not found in 'Homo Sapiens.properties' file	0.Annotation definition not found in 'Homo Sapiens.properties' file	0.278195	1	4	ENSG00000010818	GENE-processed_transcript,protein_coding	3097	HIVEP2	HIVEP2		false	3097	147	0	1	ASSOCIATED_NEW_GENE	0	0.991763	false	0	3097	0	0	[P31629]	3097
			4.24865	0			3.Intra Cellular	3.Intra Cellular	0.235369	1	6	ENSG00000156515	GENE-nonsense_mediated_decay,processed_transcript,protein_coding,retained_intron	3098	HK1	HK1		false	3098	48	0	1	ASSOCIATED_NEW_GENE	0	0.989687	false	0	3098	0	0	[A0A024QZK7, A0A2R8Y626, A0A2R8Y7T9, A0A2R8YEE7, A8K7J7, B1AR62, B3KXY9, P19367, P78542, Q59FD4]	3098
			3.59459	0			1.Extracellular	1.Extracellular, 2.Plasma Membrane, 3.Intra Cellular	0.278195	1	4	ENSG00000198502	GENE-protein_coding	3127	HLA-DRB5	HLA-DRB5		false	3127	147	0	1	ASSOCIATED_NEW_GENE	0	0.991763	false	0	3127	0	0	[A0A024F8R0, A0A024F8S6, A0A024F9V3, A0A068B7P5, A0A0P1GL35, A0A0Y0BU96, A0A173ADR4, A0A173ADR5, A0A173ADR6, A0A173ADR7, A0A173ADS0, A0A173ADS1, A0A173ADS8, A0A173ADW6, A0A173ADY0, A0A180H5P8, A0A180H5R4, A0A180H5S5, A0A180H5X1, A0A180H6K7, A0A180H6P7, A0A180H767, A0A1B0Z6G7, A0A1C8DWJ8, A0A1L2BMT2, A0A1L2BMT6, A0A1L2BMT9, A0A1L2BMU9, A0A1L2BMV3, A0A1S5QRP1, A0A1S5QRQ1, A0A1S5QRQ2, A0A1S5QRQ4, A0…	3127
			3.20811	0			3.Intra Cellular	3.Intra Cellular	0.31171	1	6	ENSG00000101076	GENE-nonsense_mediated_decay,processed_transcript,protein_coding,retained_intron	3172	HNF4A	HNF4A		false	3172	315	0	1	ASSOCIATED_NEW_GENE	0	0.99299	false	0	3172	0	0	[A0A087WXV4, A0A2R3XWA5, A0A2R3XWA6, A0A2R3XWC8, A0A2R3XWF7, A0A804HI58, A0A804HIR4, A0A804HJ41, A0A804HJ81, A0A804HJJ6, A0A804HJL7, B9VVT8, F1D8S2, F1D8T0, F1D8T1, F8WBS7, P41235, Q8NHY1]	3172
			3.20811	0			0.Annotation definition not found in 'Homo Sapiens.properties' file	0.Annotation definition not found in 'Homo Sapiens.properties' file	0.31171	1	6	ENSG00000105323	GENE-nonsense_mediated_decay,processed_transcript,protein_coding,retained_intron	11100	HNRNPUL1	HNRNPUL1		false	11100	315	0	1	ASSOCIATED_NEW_GENE	0	0.99299	false	0	11100	0	0	[A0A024R0J9, A0A087X1I2, A0A0A0MRA5, A8K3W4, B7Z4B8, L0R5B4, M0QYG9, M0QYI8, M0QYM5, M0QYZ0, M0QZV6, M0R0K8, M0R203, M0R247, M0R3F1, Q9BUJ2]	11100
			3.20811	0			0.Annotation definition not found in 'Homo Sapiens.properties' file	0.Annotation definition not found in 'Homo Sapiens.properties' file	0.31171	1	6	ENSG00000228630	GENE-lncRNA	100124700	HOTAIR	HOTAIR		false	100124700	315	0	1	ASSOCIATED_NEW_GENE	0	0.99299	false	0	100124700	0	0		100124700
			3.20811	0			0.Annotation definition not found in 'Homo Sapiens.properties' file	0.Annotation definition not found in 'Homo Sapiens.properties' file	0.31171	1	6	ENSG00000106031	GENE-processed_transcript,protein_coding	3209	HOXA13	HOXA13		false	3209	315	0	1	ASSOCIATED_NEW_GENE	0	0.99299	false	0	3209	0	0	[I6N936, P31271, Q6DI00]	3209
			4.24865	0			0.Annotation definition not found in 'Homo Sapiens.properties' file	0.Annotation definition not found in 'Homo Sapiens.properties' file	0.235369	1	6	ENSG00000105997	GENE-processed_transcript,protein_coding	3200	HOXA3	HOXA3		false	3200	48	0	1	ASSOCIATED_NEW_GENE	0	0.989687	false	0	3200	0	0	[A0A024RA33, A4D182, B3KPN8, E5RIJ8, F2Z3A4, O43365]	3200
			3.20811	0			0.Annotation definition not found in 'Homo Sapiens.properties' file	0.Annotation definition not found in 'Homo Sapiens.properties' file	0.31171	1	6	ENSG00000120068	GENE-protein_coding	3218	HOXB8	HOXB8		false	3218	315	0	1	ASSOCIATED_NEW_GENE	0	0.99299	false	0	3218	0	0	[I3L383, I3L3R1, P17481, Q8N8T3]	3218
			3.20811	0			2.Plasma Membrane	2.Plasma Membrane, 3.Intra Cellular	0.31171	1	6	ENSG00000072506	GENE-processed_transcript,protein_coding,retained_intron	3028	HSD17B10	HSD17B10		false	3028	315	0	1	ASSOCIATED_NEW_GENE	0	0.99299	false	0	3028	0	0	[A0A0S2Z410, A0A0S2Z434, A0A804HHW5, Q5H928, Q99714]	3028
			3.81622	0			1.Extracellular	1.Extracellular, 2.Plasma Membrane, 3.Intra Cellular	0.26204	1	6	ENSG00000080824	GENE-nonsense_mediated_decay,protein_coding,retained_intron	3320	HSP90AA1	HSP90AA1		false	3320	132	0	1	ASSOCIATED_NEW_GENE	0	0.99106	false	0	3320	0	0	[A0A0U1RR69, G3V2J8, G3V592, H0YJF5, K9JA46, P07900, Q2VPJ6, Q86SX1, Q8TBA7, Q96HX7]	3320
			3.20811	0			1.Extracellular	1.Extracellular, 2.Plasma Membrane, 3.Intra Cellular	0.31171	1	6	ENSG00000204389	GENE-protein_coding	3303	HSPA1A	HSPA1A		false	3303	315	0	1	ASSOCIATED_NEW_GENE	0	0.99299	false	0	3303	0	0	[A8K5I0, B3KTT5, P0DMV8, P0DMV9, V9GZ37]	3303
			3.20811	0			1.Extracellular	1.Extracellular, 2.Plasma Membrane, 3.Intra Cellular	0.31171	1	6	ENSG00000204388	GENE-protein_coding	3304	HSPA1B	HSPA1B		false	3304	315	0	1	ASSOCIATED_NEW_GENE	0	0.99299	false	0	3304	0	0	[A0A0G2JIW1, A8K5I0, P0DMV8, P0DMV9]	3304
			3.20811	0			1.Extracellular	1.Extracellular, 3.Intra Cellular	0.31171	1	6	ENSG00000086758	GENE-nonsense_mediated_decay,processed_transcript,protein_coding,retained_intron	10075	HUWE1	HUWE1		false	10075	315	0	1	ASSOCIATED_NEW_GENE	0	0.99299	false	0	10075	0	0	[A0A024R9U8, A0A024R9W5, A0A024R9Y3, A0A087X146, A0A087X1S3, A0A1B0GXC7, H0Y659, L8E996, Q3B7K0, Q5H924, Q5H935, Q5H962, Q5H963, Q5H964, Q7Z6Z7, Q8IWJ0]	10075
			3.76757	0			3.Intra Cellular	3.Intra Cellular	0.265423	1	6	ENSG00000181873	GENE-processed_transcript,protein_coding	200205	IBA57	IBA57		false	200205	108	0	1	ASSOCIATED_NEW_GENE	0	0.991214	false	0	200205	0	0	[B4E1G9, Q5T440]	200205
			3.59459	0			3.Intra Cellular	3.Intra Cellular	0.278195	1	4	ENSG00000163596	GENE-nonsense_mediated_decay,protein_coding,retained_intron	130026	ICA1L	ICA1L		false	130026	147	0	1	ASSOCIATED_NEW_GENE	0	0.991763	false	0	130026	0	0	[A0A024R3W3, C9J0T2, C9J101, C9J1M7, C9J5Z0, C9J9Z8, C9JAQ4, C9JDK6, C9JDM8, C9JEN4, C9JEP0, C9JP49, C9JRB6, F8WBK1, F8WBQ1, Q8NDH6, Q96Q33]	130026
			3.20811	0			1.Extracellular	1.Extracellular	0.31171	1	6	ENSG00000171855	GENE-protein_coding	3456	IFNB1	IFNB1		false	3456	315	0	1	ASSOCIATED_NEW_GENE	0	0.99299	false	0	3456	0	0	[A0A7R8GV38, B5BUQ5, P01574]	3456
			3.20811	0			2.Plasma Membrane	2.Plasma Membrane	0.31171	1	6	ENSG00000185436	GENE-protein_coding	163702	IFNLR1	IFNLR1		false	163702	315	0	1	ASSOCIATED_NEW_GENE	0	0.99299	false	0	163702	0	0	[Q5VTX9, Q8IU57]	163702
			4.24865	0			3.Intra Cellular	3.Intra Cellular	0.235369	1	6	ENSG00000159217	GENE-processed_transcript,protein_coding,retained_intron	10642	IGF2BP1	IGF2BP1		false	10642	48	0	1	ASSOCIATED_NEW_GENE	0	0.989687	false	0	10642	0	0	[D3DTW3, L8ECD2, Q9NZI8]	10642
			3.20811	0			3.Intra Cellular	3.Intra Cellular, 5.Nucleus	0.31171	1	6	ENSG00000136231	GENE-nonsense_mediated_decay,processed_transcript,protein_coding,retained_intron	10643	IGF2BP3	IGF2BP3		false	10643	315	0	1	ASSOCIATED_NEW_GENE	0	0.99299	false	0	10643	0	0	[F8WD15, O00425]	10643
			3.81622	0			1.Extracellular	1.Extracellular	0.26204	1	6	ENSG00000147255	GENE-processed_transcript,protein_coding,retained_intron	3547	IGSF1	IGSF1		false	3547	132	0	1	ASSOCIATED_NEW_GENE	0	0.99106	false	0	3547	0	0	[A0A494C0E7, A0A494C0H8, A0A494C0K8, A0A494C0W8, Q8N6C5]	3547
			3.20811	0			3.Intra Cellular	3.Intra Cellular	0.31171	1	6	ENSG00000113141	GENE-nonsense_mediated_decay,processed_transcript,protein_coding,retained_intron	3550	IK	IK		false	3550	315	0	1	ASSOCIATED_NEW_GENE	0	0.99299	false	0	3550	0	0	[A0A0C4DGW5, D6RAH1, D6RAY9, D6RCQ4, D6REL4, E7EQZ7, Q13123, Q95HA6, Q9UK43]	3550
			3.20811	0			1.Extracellular	1.Extracellular, 2.Plasma Membrane	0.31171	1	6	ENSG00000160712	GENE-processed_transcript,protein_coding,retained_intron	3570	IL6R	IL6R		false	3570	315	0	1	ASSOCIATED_NEW_GENE	0	0.99299	false	0	3570	0	0	[A0A087WTB5, A0N0L5, D6R9R8, H0Y949, H0Y9B1, P08887]	3570
			3.20811	0			3.Intra Cellular	3.Intra Cellular	0.31171	1	6	ENSG00000132305	GENE-nonsense_mediated_decay,processed_transcript,protein_coding,retained_intron	10989	IMMT	IMMT		false	10989	315	0	1	ASSOCIATED_NEW_GENE	0	0.99299	false	0	10989	0	0	[A0A087WYS0, B9A067, C9J406, D6RAW4, H7C463, Q05DN3, Q16891, Q3B7X4]	10989
			3.20811	0			3.Intra Cellular	3.Intra Cellular	0.31171	1	6	ENSG00000133731	GENE-nonsense_mediated_decay,processed_transcript,protein_coding,retained_intron	3612	IMPA1	IMPA1		false	3612	315	0	1	ASSOCIATED_NEW_GENE	0	0.99299	false	0	3612	0	0	[A0A024R830, A0A140VJL8, E5RG13, E5RG94, E5RGY4, E5RHE9, E5RI82, E5RIF4, E5RIP7, H0YBL1, P29218]	3612
			3.20811	0			1.Extracellular	1.Extracellular, 3.Intra Cellular	0.31171	1	6	ENSG00000106348	GENE-nonsense_mediated_decay,protein_coding,retained_intron	3614	IMPDH1	IMPDH1		false	3614	315	0	1	ASSOCIATED_NEW_GENE	0	0.99299	false	0	3614	0	0	[A0A024R725, A0A3B3IRL5, B3KRZ3, C9J029, C9J381, C9K0R9, F8WDE9, H7C511, H7C5T1, P20839, Q6ZNB1]	3614
			3.20811	0			1.Extracellular	1.Extracellular, 3.Intra Cellular	0.31171	1	6	ENSG00000178035	GENE-nonsense_mediated_decay,protein_coding,retained_intron	3615	IMPDH2	IMPDH2		false	3615	315	0	1	ASSOCIATED_NEW_GENE	0	0.99299	false	0	3615	0	0	[A0A384N6C2, A0A7I2V2T3, A0A7I2V337, A0A7I2V5N6, A0A7I2YQK5, E7ETK5, H0Y4R1, P12268, Q6QE17, Q6RUP8, Q6RUP9]	3615
			5.45946	0			3.Intra Cellular	3.Intra Cellular	0.183168	1	6	ENSG00000149503	GENE-processed_transcript,protein_coding,retained_intron	3619	INCENP	INCENP		false	3619	25	0	1	ASSOCIATED_NEW_GENE	0	0.985843	false	0	3619	0	0	[E9PM67, Q9NQS7]	3619
			3.20811	0			1.Extracellular	1.Extracellular, 3.Intra Cellular	0.31171	1	6	ENSG00000163083	GENE-protein_coding	3625	INHBB	INHBB		false	3625	315	0	1	ASSOCIATED_NEW_GENE	0	0.99299	false	0	3625	0	0	[A0PK08, P09529]	3625
			3.81622	0			2.Plasma Membrane	2.Plasma Membrane, 3.Intra Cellular	0.26204	1	6	ENSG00000148384	GENE-processed_transcript,protein_coding,retained_intron	56623	INPP5E	INPP5E		false	56623	132	0	1	ASSOCIATED_NEW_GENE	0	0.99106	false	0	56623	0	0	[A0A6Q8PH37, Q2YD81, Q9NRR6]	56623
			3.81622	0			0.Annotation definition not found in 'Homo Sapiens.properties' file	0.Annotation definition not found in 'Homo Sapiens.properties' file	0.26204	1	6	ENSG00000204767	GENE-processed_transcript,protein_coding	100131897	INSYN2B	INSYN2B		false	100131897	132	0	1	ASSOCIATED_NEW_GENE	0	0.99106	false	0	100131897	0	0	[A6NMK8]	100131897
			3.76757	0			3.Intra Cellular	3.Intra Cellular, 5.Nucleus	0.265423	1	6	ENSG00000176095	GENE-processed_transcript,protein_coding,retained_intron	9807	IP6K1	IP6K1		false	9807	108	0	1	ASSOCIATED_NEW_GENE	0	0.991214	false	0	9807	0	0	[A0A024R2X2, C9JNA8, L8EAR7, Q92551]	9807
			3.20811	0			0.Annotation definition not found in 'Homo Sapiens.properties' file	0.Annotation definition not found in 'Homo Sapiens.properties' file	0.31171	1	6	ENSG00000167378	GENE-processed_transcript,protein_coding	126298	IRGQ	IRGQ		false	126298	315	0	1	ASSOCIATED_NEW_GENE	0	0.99299	false	0	126298	0	0	[B7ZMD6, M0QZP8, Q8WZA9]	126298
			3.20811	0			2.Plasma Membrane	2.Plasma Membrane	0.31171	1	6	ENSG00000137809	GENE-processed_transcript,protein_coding,retained_intron	22801	ITGA11	ITGA11		false	22801	315	0	1	ASSOCIATED_NEW_GENE	0	0.99299	false	0	22801	0	0	[B3KTN6, Q9UKX5]	22801
			3.20811	0			2.Plasma Membrane	2.Plasma Membrane	0.31171	1	6	ENSG00000091409	GENE-protein_coding,retained_intron	3655	ITGA6	ITGA6		false	3655	315	0	1	ASSOCIATED_NEW_GENE	0	0.99299	false	0	3655	0	0	[A0A8C8KBL6, C9JXX7, H7BZ97, P23229]	3655
			3.20811	0			1.Extracellular	1.Extracellular, 2.Plasma Membrane, 3.Intra Cellular	0.31171	1	6	ENSG00000259207	GENE-nonsense_mediated_decay,protein_coding	3690	ITGB3	ITGB3		false	3690	315	0	1	ASSOCIATED_NEW_GENE	0	0.99299	false	0	3690	0	0	[A0A5E4DMZ9, A0A6B9NYH9, A7U833, F1C630, F1C632, F1C633, F1C634, F2X0U9, F2X0V0, I3L4X8, L7UUZ7, L7UW06, L7WKL1, P05106, Q16157, Q1PBM2]	3690
			3.76757	0			3.Intra Cellular	3.Intra Cellular	0.265423	1	6	ENSG00000143772	GENE-protein_coding	3707	ITPKB	ITPKB		false	3707	108	0	1	ASSOCIATED_NEW_GENE	0	0.991214	false	0	3707	0	0	[B2R9J0, P27987]	3707
			3.20811	0			3.Intra Cellular	3.Intra Cellular	0.31171	1	6	ENSG00000008083	GENE-processed_transcript,protein_coding	3720	JARID2	JARID2		false	3720	315	0	1	ASSOCIATED_NEW_GENE	0	0.99299	false	0	3720	0	0	[Q92833]	3720
			3.81622	0			3.Intra Cellular	3.Intra Cellular, 5.Nucleus	0.26204	1	6	ENSG00000083168	GENE-nonsense_mediated_decay,protein_coding,retained_intron	7994	KAT6A	KAT6A		false	7994	132	0	1	ASSOCIATED_NEW_GENE	0	0.99106	false	0	7994	0	0	[A0A3B3IS53, A0A3B3ISU5, A0A3B3ISZ3, A0A3B3ITI3, A0A3F2YNX6, A5PKX7, A5PLL3, C9JJY6, Q92794]	7994
			4.24865	0			3.Intra Cellular	3.Intra Cellular	0.235369	1	6	ENSG00000163376	GENE-processed_transcript,protein_coding	84541	KBTBD8	KBTBD8		false	84541	48	0	1	ASSOCIATED_NEW_GENE	0	0.989687	false	0	84541	0	0	[C9J331, C9JAA6, Q8NFY9]	84541
			3.59459	0			2.Plasma Membrane	2.Plasma Membrane, 3.Intra Cellular	0.278195	1	4	ENSG00000131398	GENE-protein_coding	3748	KCNC3	KCNC3		false	3748	147	0	1	ASSOCIATED_NEW_GENE	0	0.991763	false	0	3748	0	0	[A0A590UJ62, E7ETH1, E9PQY4, Q14003]	3748
			3.20811	0			2.Plasma Membrane	2.Plasma Membrane, 3.Intra Cellular, 4.Nuclear Membrane	0.31171	1	6	ENSG00000143473	GENE-nonsense_mediated_decay,processed_transcript,protein_coding,retained_intron	3756	KCNH1	KCNH1		false	3756	315	0	1	ASSOCIATED_NEW_GENE	0	0.99299	false	0	3756	0	0	[A0A0S1TJ81, A0A0S1TL27, A0A1W2PNI2, A0A1W2PP68, A0A1W2PPA2, A0A1W2PRD8, A0A1W2PRV9, A0A1W2PRZ5, A0A1X7SBS6, L8EAS2, O95259]	3756
			3.20811	0			3.Intra Cellular	3.Intra Cellular, 5.Nucleus	0.31171	1	6	ENSG00000066135	GENE-nonsense_mediated_decay,protein_coding,retained_intron	9682	KDM4A	KDM4A		false	9682	315	0	1	ASSOCIATED_NEW_GENE	0	0.99299	false	0	9682	0	0	[A0A2R8Y7L1, A0A2R8YDF7, L8ECF0, O75164]	9682
			3.59459	0			3.Intra Cellular	3.Intra Cellular, 5.Nucleus	0.278195	1	4	ENSG00000073614	GENE-processed_transcript,protein_coding,retained_intron	5927	KDM5A	KDM5A		false	5927	147	0	1	ASSOCIATED_NEW_GENE	0	0.991763	false	0	5927	0	0	[A0A6B9SM32, E7EV89, F5GZ99, F5GZR8, F5H322, P29375]	5927
			3.20811	0			2.Plasma Membrane	2.Plasma Membrane, 3.Intra Cellular	0.31171	1	6	ENSG00000121774	GENE-processed_transcript,protein_coding	10657	KHDRBS1	KHDRBS1		false	10657	315	0	1	ASSOCIATED_NEW_GENE	0	0.99299	false	0	10657	0	0	[B4E043, Q07666]	10657
			3.20811	0			3.Intra Cellular	3.Intra Cellular	0.31171	1	6	ENSG00000138160	GENE-nonsense_mediated_decay,protein_coding	3832	KIF11	KIF11		false	3832	315	0	1	ASSOCIATED_NEW_GENE	0	0.99299	false	0	3832	0	0	[A0A7I2V3A9, A0A7I2V3V3, A0A7I2YQY4, P52732]	3832
			3.20811	0			2.Plasma Membrane	2.Plasma Membrane, 3.Intra Cellular, 5.Nucleus	0.31171	1	6	ENSG00000068796	GENE-nonsense_mediated_decay,protein_coding,retained_intron	3796	KIF2A	KIF2A		false	3796	315	0	1	ASSOCIATED_NEW_GENE	0	0.99299	false	0	3796	0	0	[A0A669KBE9, A0A6Q8PFA6, A0A6Q8PG37, A0A6Q8PGG1, A0A6Q8PGH7, A0A6Q8PH57, B0AZS5, D6R9M0, D6RD93, H0Y8H2, O00139]	3796
			3.20811	0			3.Intra Cellular	3.Intra Cellular	0.31171	1	6	ENSG00000142945	GENE-processed_transcript,protein_coding	11004	KIF2C	KIF2C		false	11004	315	0	1	ASSOCIATED_NEW_GENE	0	0.99299	false	0	11004	0	0	[A0A140VKF1, B7Z6Q6, B7Z7M6, H0Y5Z9, Q5JR89, Q5JR91, Q99661]	11004
			3.20811	0			3.Intra Cellular	3.Intra Cellular	0.31171	1	6	ENSG00000090889	GENE-processed_transcript,protein_coding	24137	KIF4A	KIF4A		false	24137	315	0	1	ASSOCIATED_NEW_GENE	0	0.99299	false	0	24137	0	0	[O95239, Q59HG1, Q6PKB2]	24137
			3.20811	0			3.Intra Cellular	3.Intra Cellular	0.31171	1	6	ENSG00000170759	GENE-processed_transcript,protein_coding	3799	KIF5B	KIF5B		false	3799	315	0	1	ASSOCIATED_NEW_GENE	0	0.99299	false	0	3799	0	0	[D3DRX6, P33176, Q2TA90, Q66K46, Q6P164, V9HW29]	3799
			3.81622	0			2.Plasma Membrane	2.Plasma Membrane, 3.Intra Cellular	0.26204	1	6	ENSG00000075945	GENE-processed_transcript,protein_coding	22920	KIFAP3	KIFAP3		false	22920	132	0	1	ASSOCIATED_NEW_GENE	0	0.99106	false	0	22920	0	0	[Q92845]	22920
			3.20811	0			1.Extracellular	1.Extracellular, 2.Plasma Membrane, 3.Intra Cellular, 5.Nucleus	0.31171	1	6	ENSG00000157404	GENE-nonsense_mediated_decay,processed_transcript,protein_coding,retained_intron	3815	KIT	KIT		false	3815	315	0	1	ASSOCIATED_NEW_GENE	0	0.99299	false	0	3815	0	0	[A0A0U2N547, B6DXN3, B6E0M6, D5MAV8, D5MAV9, E2I6G0, L8E780, P10721, Q15999, Q8TCG9, Q9UMA0]	3815
			3.20811	0			2.Plasma Membrane	2.Plasma Membrane	0.31171	1	6	ENSG00000134962	GENE-protein_coding	152831	KLB	KLB		false	152831	315	0	1	ASSOCIATED_NEW_GENE	0	0.99299	false	0	152831	0	0	[B4DYH5, B7ZL50, Q49AQ7, Q86Z14]	152831
			3.20811	0			3.Intra Cellular	3.Intra Cellular	0.31171	1	6	ENSG00000126214	GENE-nonsense_mediated_decay,protein_coding,retained_intron	3831	KLC1	KLC1		false	3831	315	0	1	ASSOCIATED_NEW_GENE	0	0.99299	false	0	3831	0	0	[B5BU63, F8W6L3, G3V2E7, G3V2P7, G3V3H3, G3V5R9, G5E9S8, H0YG16, H0YGB8, H0YJK1, H0YJL0, H0YJT3, H0YJU9, Q07866, Q7RTQ2]	3831
			3.76757	0			0.Annotation definition not found in 'Homo Sapiens.properties' file	0.Annotation definition not found in 'Homo Sapiens.properties' file	0.265423	1	6	ENSG00000163884	GENE-processed_transcript,protein_coding	28999	KLF15	KLF15		false	28999	108	0	1	ASSOCIATED_NEW_GENE	0	0.991214	false	0	28999	0	0	[Q9UIH9]	28999
			3.20811	0	Transcription Factor Complex		3.Intra Cellular	3.Intra Cellular	0.31171	1	6	ENSG00000136826	GENE-protein_coding,retained_intron	9314	KLF4	KLF4		false	9314	315	0	1	ASSOCIATED_NEW_GENE	0	0.99299	false	0	9314	0	0	[A0A087X0S4, B7ZBT2, F2VTX5, L0R3V2, O43474]	9314
			3.20811	0			3.Intra Cellular	3.Intra Cellular	0.31171	1	6	ENSG00000114030	GENE-nonsense_mediated_decay,processed_transcript,protein_coding	3836	KPNA1	KPNA1		false	3836	315	0	1	ASSOCIATED_NEW_GENE	0	0.99299	false	0	3836	0	0	[B3KXZ2, C9J352, C9J4U1, C9JWD9, C9JYI4, F2Z3G4, L8EC94, P52294, Q5BKZ2]	3836
			3.76757	0			1.Extracellular	1.Extracellular, 3.Intra Cellular	0.265423	1	6	ENSG00000135480	GENE-processed_transcript,protein_coding,retained_intron	3855	KRT7	KRT7		false	3855	108	0	1	ASSOCIATED_NEW_GENE	0	0.991214	false	0	3855	0	0	[A0A1W2PRP1, P08729, Q3B834, Q3KNV1]	3855
			3.20811	0			2.Plasma Membrane	2.Plasma Membrane, 3.Intra Cellular	0.31171	1	6	ENSG00000126777	GENE-nonsense_mediated_decay,protein_coding,retained_intron	3895	KTN1	KTN1		false	3895	315	0	1	ASSOCIATED_NEW_GENE	0	0.99299	false	0	3895	0	0	[A0A024R663, B7Z6P3, G3V475, G3V4L8, G3V4Y7, G3V5G2, G3V5P0, G3V5Q0, H0YJB7, H0YJP2, H0YJV5, H0YJZ8, Q3SWV9, Q6NZ46, Q6PDF7, Q86UP2]	3895
			3.20811	0			1.Extracellular	1.Extracellular, 2.Plasma Membrane	0.31171	1	6	ENSG00000198910	GENE-processed_transcript,protein_coding,retained_intron	3897	L1CAM	L1CAM		false	3897	315	0	1	ASSOCIATED_NEW_GENE	0	0.99299	false	0	3897	0	0	[E7EMY4, E7EPI4, E7EVM4, E9PHJ4, H0Y5C3, H3BLW5, P32004, Q7Z2F9, Q7Z2H2, Q7Z2I3, Q7Z2J0, Q7Z2J6, Q7Z2J8, Q7Z2J9, Q7Z3Z9, Q86SE4]	3897
			3.59459	0			1.Extracellular	1.Extracellular, 2.Plasma Membrane, 3.Intra Cellular	0.278195	1	4	ENSG00000109270	GENE-processed_transcript,protein_coding	8649	LAMTOR3	LAMTOR3		false	8649	147	0	1	ASSOCIATED_NEW_GENE	0	0.991763	false	0	8649	0	0	[Q9UHA4]	8649
			3.20811	0			3.Intra Cellular	3.Intra Cellular	0.31171	1	6	ENSG00000155506	GENE-nonsense_mediated_decay,protein_coding,retained_intron	23367	LARP1	LARP1		false	23367	315	0	1	ASSOCIATED_NEW_GENE	0	0.99299	false	0	23367	0	0	[A0A0B4J210, E5RH50, E5RHK4, H0YAN4, H0YAX9, H0YBJ5, H0YBM7, H0YBR8, H0YBW1, H0YC33, H0YC73, Q6PKG0]	23367
			3.76757	0			3.Intra Cellular	3.Intra Cellular	0.265423	1	6	ENSG00000002834	GENE-nonsense_mediated_decay,protein_coding,retained_intron	3927	LASP1	LASP1		false	3927	108	0	1	ASSOCIATED_NEW_GENE	0	0.991214	false	0	3927	0	0	[A0A024R1S8, B4DIC4, C9J9W2, F6S2S5, J3KSN1, K7ESD6, Q14847]	3927
			3.81622	0			0.Annotation definition not found in 'Homo Sapiens.properties' file	0.Annotation definition not found in 'Homo Sapiens.properties' file	0.26204	1	6	ENSG00000196233	GENE-nonsense_mediated_decay,processed_transcript,protein_coding,retained_intron	84458	LCOR	LCOR		false	84458	132	0	1	ASSOCIATED_NEW_GENE	0	0.99106	false	0	84458	0	0	[A0A6Q8PFF1, A0A6Q8PFM6, A0A6Q8PFM9, A0A6Q8PFQ9, A0A6Q8PFV7, A0A6Q8PG56, A0A6Q8PG71, A0A6Q8PG83, A0A6Q8PGD6, A0A6Q8PGL8, A0A6Q8PGP3, A0A6Q8PGQ5, A0A6Q8PGR8, A0A6Q8PGV7, A0A6Q8PH28, A0A6Q8PHQ4, A2VCT1, Q96JN0]	84458
			3.81622	0			3.Intra Cellular	3.Intra Cellular	0.26204	1	6	ENSG00000166816	GENE-nonsense_mediated_decay,protein_coding,retained_intron	197257	LDHD	LDHD		false	197257	132	0	1	ASSOCIATED_NEW_GENE	0	0.99106	false	0	197257	0	0	[H3BM70, Q86WU2]	197257
			3.20811	0	Transcription Factor Complex		3.Intra Cellular	3.Intra Cellular	0.31171	1	6	ENSG00000138795	GENE-nonsense_mediated_decay,processed_transcript,protein_coding,retained_intron	51176	LEF1	LEF1		false	51176	315	0	1	ASSOCIATED_NEW_GENE	0	0.99299	false	0	51176	0	0	[D6RAB1, D6RID7, D6RIV1, G9G139, Q659G9, Q9UJU2]	51176
			3.59459	0			1.Extracellular	1.Extracellular, 3.Intra Cellular	0.278195	1	4	ENSG00000116977	GENE-nonsense_mediated_decay,protein_coding,retained_intron	3964	LGALS8	LGALS8		false	3964	147	0	1	ASSOCIATED_NEW_GENE	0	0.991763	false	0	3964	0	0	[A0A024R3S4, A0A024R3X1, B1ANM0, B3F166, E9PJ77, E9PN19, E9PNC2, E9PPL1, E9PPM4, E9PRN3, F6V2D4, H7BXD8, L8E9E9, O00214, Q5T3P9, Q96QS7]	3964
			3.59459	0			2.Plasma Membrane	2.Plasma Membrane, 3.Intra Cellular	0.278195	1	4	ENSG00000146166	GENE-protein_coding	51557	LGSN	LGSN		false	51557	147	0	1	ASSOCIATED_NEW_GENE	0	0.991763	false	0	51557	0	0	[A0A0A0MTD2, Q5TDP6]	51557
			3.81622	0			2.Plasma Membrane	2.Plasma Membrane	0.26204	1	6	ENSG00000120256	GENE-protein_coding,retained_intron	84918	LRP11	LRP11		false	84918	132	0	1	ASSOCIATED_NEW_GENE	0	0.99106	false	0	84918	0	0	[B4DS68, Q5VYB9, Q86VZ4, Q96AT3]	84918
			3.20811	0			0.Annotation definition not found in 'Homo Sapiens.properties' file	0.Annotation definition not found in 'Homo Sapiens.properties' file	0.31171	1	6	ENSG00000168904	GENE-nonsense_mediated_decay,processed_transcript,protein_coding,retained_intron	123355	LRRC28	LRRC28		false	123355	315	0	1	ASSOCIATED_NEW_GENE	0	0.99299	false	0	123355	0	0	[A0A024RC88, B4DEX4, B4DHL3, H0YK92, H0YKF6, H0YKM4, H0YKS9, H0YLR7, H0YM55, H0YM85, H0YNW4, Q86X40, Q8NB41, Q8WUS2]	123355
			3.59459	0			0.Annotation definition not found in 'Homo Sapiens.properties' file	0.Annotation definition not found in 'Homo Sapiens.properties' file	0.278195	1	4	ENSG00000105887	GENE-protein_coding	767558	LUZP6	LUZP6		false	767558	147	0	1	ASSOCIATED_NEW_GENE	0	0.991763	false	0	767558	0	0	[Q538Z0]	767558
			3.59459	0			3.Intra Cellular	3.Intra Cellular	0.278195	1	4	ENSG00000186687	GENE-processed_transcript,protein_coding	90624	LYRM7	LYRM7		false	90624	147	0	1	ASSOCIATED_NEW_GENE	0	0.991763	false	0	90624	0	0	[D6R994, D6RBV5, Q5U5X0]	90624
			3.59459	0			2.Plasma Membrane	2.Plasma Membrane, 3.Intra Cellular	0.278195	1	4	ENSG00000110514	GENE-processed_transcript,protein_coding,retained_intron	8567	MADD	MADD		false	8567	147	0	1	ASSOCIATED_NEW_GENE	0	0.991763	false	0	8567	0	0	[A0A0A0MRB5, A0A0U1RR25, C9J6B0, C9JLZ9, C9JM97, C9K0L0, F8W8U2, Q8WXG6]	8567
			3.81622	0	Transcription Factor Complex		0.Annotation definition not found in 'Homo Sapiens.properties' file	0.Annotation definition not found in 'Homo Sapiens.properties' file	0.26204	1	6	ENSG00000204103	GENE-protein_coding	9935	MAFB	MAFB		false	9935	132	0	1	ASSOCIATED_NEW_GENE	0	0.99106	false	0	9935	0	0	[L8ECC4, Q9Y5Q3]	9935
			3.20811	0			0.Annotation definition not found in 'Homo Sapiens.properties' file	0.Annotation definition not found in 'Homo Sapiens.properties' file	0.31171	1	6	ENSG00000213401	GENE-protein_coding	4111	MAGEA12	MAGEA12		false	4111	315	0	1	ASSOCIATED_NEW_GENE	0	0.99299	false	0	4111	0	0	[P43365]	4111
			3.20811	0			0.Annotation definition not found in 'Homo Sapiens.properties' file	0.Annotation definition not found in 'Homo Sapiens.properties' file	0.31171	1	6	ENSG00000268606	GENE-protein_coding	4101	MAGEA2	MAGEA2		false	4101	315	0	1	ASSOCIATED_NEW_GENE	0	0.99299	false	0	4101	0	0	[A0A024RC17, A0A087WZT8, E7ENJ0, P43356, Q2VPA5, Q6P448]	4101
			3.20811	0			3.Intra Cellular	3.Intra Cellular	0.31171	1	6	ENSG00000221867	GENE-protein_coding	4102	MAGEA3	MAGEA3		false	4102	315	0	1	ASSOCIATED_NEW_GENE	0	0.99299	false	0	4102	0	0	[E7EMU0, P43357]	4102
			3.20811	0			0.Annotation definition not found in 'Homo Sapiens.properties' file	0.Annotation definition not found in 'Homo Sapiens.properties' file	0.31171	1	6	ENSG00000197172	GENE-protein_coding	4105	MAGEA6	MAGEA6		false	4105	315	0	1	ASSOCIATED_NEW_GENE	0	0.99299	false	0	4105	0	0	[E7ETG4, E7EUF2, P43360, Q6FGT7, Q6FHI5]	4105
			3.81622	0			3.Intra Cellular	3.Intra Cellular	0.26204	1	6	ENSG00000108984	GENE-nonsense_mediated_decay,protein_coding,retained_intron	5608	MAP2K6	MAP2K6		false	5608	132	0	1	ASSOCIATED_NEW_GENE	0	0.99106	false	0	5608	0	0	[A0A024R8K3, A0A0A0MRF7, A8K3Y2, B5BU16, K7EIW3, K7ELM6, P52564]	5608
			3.81622	0			2.Plasma Membrane	2.Plasma Membrane, 3.Intra Cellular	0.26204	1	6	ENSG00000197442	GENE-processed_transcript,protein_coding	4217	MAP3K5	MAP3K5		false	4217	132	0	1	ASSOCIATED_NEW_GENE	0	0.99106	false	0	4217	0	0	[Q99683]	4217
			3.20811	0			0.Annotation definition not found in 'Homo Sapiens.properties' file	0.Annotation definition not found in 'Homo Sapiens.properties' file	0.31171	1	6	ENSG00000099308	GENE-nonsense_mediated_decay,processed_transcript,protein_coding,retained_intron	23031	MAST3	MAST3		false	23031	315	0	1	ASSOCIATED_NEW_GENE	0	0.99299	false	0	23031	0	0	[O60307, V9GYV0]	23031
			3.20811	0			5.Nucleus	5.Nucleus	0.31171	1	6	ENSG00000166987	GENE-nonsense_mediated_decay,processed_transcript,protein_coding,retained_intron	114785	MBD6	MBD6		false	114785	315	0	1	ASSOCIATED_NEW_GENE	0	0.99299	false	0	114785	0	0	[A0A024RBA3, A0A0C4DGJ6, F8VNX1, F8VPC4, F8VU14, F8VVK7, F8VW40, F8VZD7, H0YHD1, H0YHN1, H0YIU1, Q6P0P0, Q96DN6]	114785
			3.76757	0			2.Plasma Membrane	2.Plasma Membrane, 3.Intra Cellular	0.265423	1	6	ENSG00000185231	GENE-protein_coding	4158	MC2R	MC2R		false	4158	108	0	1	ASSOCIATED_NEW_GENE	0	0.991214	false	0	4158	0	0	[Q01718, R4GMM0]	4158
			3.76757	0			3.Intra Cellular	3.Intra Cellular	0.265423	1	6	ENSG00000143384	GENE-processed_transcript,protein_coding,retained_intron	4170	MCL1	MCL1		false	4170	108	0	1	ASSOCIATED_NEW_GENE	0	0.991214	false	0	4170	0	0	[A0A087WT64, A0A7I2V2W2, C8YZ26, Q03399, Q07820]	4170
			3.59459	0			3.Intra Cellular	3.Intra Cellular	0.278195	1	4	ENSG00000156026	GENE-nonsense_mediated_decay,processed_transcript,protein_coding,retained_intron	90550	MCU	MCU		false	90550	147	0	1	ASSOCIATED_NEW_GENE	0	0.991763	false	0	90550	0	0	[Q8NE86, S4R319, S4R332, S4R3F5, S4R3W8, S4R468]	90550
			3.81622	0	Transcription Factor Complex		2.Plasma Membrane	2.Plasma Membrane, 3.Intra Cellular, 5.Nucleus	0.26204	1	6	ENSG00000135679	GENE-nonsense_mediated_decay,processed_transcript,protein_coding,retained_intron	4193	MDM2	MDM2		false	4193	132	0	1	ASSOCIATED_NEW_GENE	0	0.99106	false	0	4193	0	0	[A0A0A8K972, A0A0A8K975, A0A0A8K978, A0A0A8K982, A0A0A8K986, A0A0A8K992, A0A0A8K9A1, A0A0A8K9A4, A0A0A8K9G1, A0A0A8K9G9, A0A0A8K9H4, A0A0A8K9H7, A0A0A8K9I1, A0A0A8KA03, A0A0A8KA06, A0A0A8KA17, A0A0A8KB67, A0A0A8KB70, A0A0A8KB75, A0A0A8KB78, A0A0A8KB88, A0A0A8KB92, A0A0A8KB97, A0A0A8KBA1, A0A0C4DFR5, A0A1B0GXJ6, A7UKX7, A7UKX8, A7UKX9, A8WFP2, D0EKL1, E5RHE2, E5RJQ0, E7EMW5, E7EPE2, F5GWH7, F5GZB0…	4193
			3.20811	0	Transcription Factor Complex		0.Annotation definition not found in 'Homo Sapiens.properties' file	0.Annotation definition not found in 'Homo Sapiens.properties' file	0.31171	1	6	ENSG00000198625	GENE-processed_transcript,protein_coding	4194	MDM4	MDM4		false	4194	315	0	1	ASSOCIATED_NEW_GENE	0	0.99299	false	0	4194	0	0	[A0A087WTR9, A0A087WUE3, A0A087WZ58, M9UVU3, O15151, Q59FS6, Q5T0Y2, Q5T0Y3, Q5T0Y4, Q68DC0, Q6MZR7]	4194
			3.81622	0	Transcription Factor Complex		3.Intra Cellular	3.Intra Cellular	0.26204	1	6	ENSG00000148297	GENE-processed_transcript,protein_coding,retained_intron	6837	MED22	MED22		false	6837	132	0	1	ASSOCIATED_NEW_GENE	0	0.99106	false	0	6837	0	0	[A0A024R8C5, E7EN96, E9PGW7, L8E9B4, Q15528, Q5T8T6, Q5T8T7, Q5T8T8]	6837
			3.81622	0	Transcription Factor Complex		0.Annotation definition not found in 'Homo Sapiens.properties' file	0.Annotation definition not found in 'Homo Sapiens.properties' file	0.26204	1	6	ENSG00000136146	GENE-non_stop_decay,protein_coding	29079	MED4	MED4		false	29079	132	0	1	ASSOCIATED_NEW_GENE	0	0.99106	false	0	29079	0	0	[A0A024RDY7, A0A087X0U0, Q5T911, Q9NPJ6, U4PSC4]	29079
			3.20811	0			3.Intra Cellular	3.Intra Cellular	0.31171	1	6	ENSG00000164024	GENE-nonsense_mediated_decay,processed_transcript,protein_coding,retained_intron	23173	METAP1	METAP1		false	23173	315	0	1	ASSOCIATED_NEW_GENE	0	0.99299	false	0	23173	0	0	[D6RF24, H0Y903, H0Y955, H0Y9L0, H0YAI3, P53582]	23173
			3.59459	0			3.Intra Cellular	3.Intra Cellular, 5.Nucleus	0.278195	1	4	ENSG00000037897	GENE-nonsense_mediated_decay,processed_transcript,protein_coding,retained_intron	4234	METTL1	METTL1		false	4234	147	0	1	ASSOCIATED_NEW_GENE	0	0.991763	false	0	4234	0	0	[A0A024RB62, F8VSD9, H0YHU4, H0YHX0, H0YIH0, Q9UBP6]	4234
			3.20811	0			3.Intra Cellular	3.Intra Cellular	0.31171	1	6	ENSG00000164073	GENE-nonsense_mediated_decay,processed_transcript,protein_coding,retained_intron	256471	MFSD8	MFSD8		false	256471	315	0	1	ASSOCIATED_NEW_GENE	0	0.99299	false	0	256471	0	0	[A0A286YER2, A0A286YEV4, A0A286YEV9, A0A286YEW2, A0A286YEW6, A0A286YEW7, A0A286YEW8, A0A286YEX1, A0A286YEY8, A0A286YF00, A0A286YF45, A0A286YF51, A0A286YF72, A0A286YF73, A0A286YF82, A0A286YF93, A0A286YFB5, A0A286YFC6, A0A286YFE6, A0A286YFE7, A0A286YFF1, A0A286YFF5, A0A286YFG7, A0A286YFH3, A0A286YFH9, A0A286YFI8, A0A286YFI9, A0A286YFJ5, A0A286YFK4, A0A286YFM2, A0A286YFM7, B7Z2B2, E7ERQ4, Q8NHS3]	256471
			3.81622	0			3.Intra Cellular	3.Intra Cellular, 5.Nucleus	0.26204	1	6	ENSG00000167470	GENE-protein_coding,retained_intron	90007	MIDN	MIDN		false	90007	132	0	1	ASSOCIATED_NEW_GENE	0	0.99106	false	0	90007	0	0	[A0A804HKJ8, K7END3, Q504T8]	90007
			3.20811	0			2.Plasma Membrane	2.Plasma Membrane, 3.Intra Cellular	0.31171	1	6	ENSG00000180488	GENE-nonsense_mediated_decay,protein_coding,retained_intron	374986	MIGA1	MIGA1		false	374986	315	0	1	ASSOCIATED_NEW_GENE	0	0.99299	false	0	374986	0	0	[A0A2R8YDC7, A0A2R8YE40, A0A2R8YF99, A0A2R8YFQ8, A0A2R8YGK2, B4DK63, B7ZLZ8, F8W7S1, Q8NAN2]	374986
			3.59459	0			3.Intra Cellular	3.Intra Cellular	0.278195	1	4	ENSG00000160124	GENE-processed_transcript,protein_coding,retained_intron	131076	MIX23	MIX23		false	131076	147	0	1	ASSOCIATED_NEW_GENE	0	0.991763	false	0	131076	0	0	[C9JBU9, C9JQ41, H7C525, Q4VC31]	131076
			3.20811	0			3.Intra Cellular	3.Intra Cellular	0.31171	1	6	ENSG00000099875	GENE-nonsense_mediated_decay,protein_coding,retained_intron	2872	MKNK2	MKNK2		false	2872	315	0	1	ASSOCIATED_NEW_GENE	0	0.99299	false	0	2872	0	0	[B3KS07, K7EIN7, K7EJ98, K7EK27, K7ELG3, K7ELN0, K7EMP5, Q9HBH9, Q9NV89]	2872
			3.76757	0			2.Plasma Membrane	2.Plasma Membrane, 3.Intra Cellular	0.265423	1	6	ENSG00000110917	GENE-processed_transcript,protein_coding	9761	MLEC	MLEC		false	9761	108	0	1	ASSOCIATED_NEW_GENE	0	0.991214	false	0	9761	0	0	[F5GX14, F5H1S8, H0YG07, Q14165]	9761
			3.76757	0			1.Extracellular	1.Extracellular, 2.Plasma Membrane, 3.Intra Cellular	0.265423	1	6	ENSG00000157227	GENE-non_stop_decay,nonsense_mediated_decay,processed_transcript,protein_coding,retained_intron	4323	MMP14	MMP14		false	4323	108	0	1	ASSOCIATED_NEW_GENE	0	0.991214	false	0	4323	0	0	[A0A7P0TAG0, A0A7P0TAV6, A0A7P0TBK8, F8VP90, K4RH61, P50281]	4323
			3.59459	0			0.Annotation definition not found in 'Homo Sapiens.properties' file	0.Annotation definition not found in 'Homo Sapiens.properties' file	0.278195	1	4	ENSG00000174579	GENE-protein_coding	55167	MSL2	MSL2		false	55167	147	0	1	ASSOCIATED_NEW_GENE	0	0.991763	false	0	55167	0	0	[C9IZ03, C9IZG7, C9J5S2, Q9HCI7]	55167
			3.76757	0			1.Extracellular	1.Extracellular, 2.Plasma Membrane, 3.Intra Cellular	0.265423	1	6	ENSG00000147065	GENE-processed_transcript,protein_coding	4478	MSN	MSN		false	4478	108	0	1	ASSOCIATED_NEW_GENE	0	0.991214	false	0	4478	0	0	[P26038, Q6PJT4, V9GZ54, V9HWC0]	4478
			3.20811	0	Transcription Factor Complex		0.Annotation definition not found in 'Homo Sapiens.properties' file	0.Annotation definition not found in 'Homo Sapiens.properties' file	0.31171	1	6	ENSG00000149480	GENE-protein_coding,retained_intron	9219	MTA2	MTA2		false	9219	315	0	1	ASSOCIATED_NEW_GENE	0	0.99299	false	0	9219	0	0	[A0A024R534, O94776]	9219
			3.59459	0			1.Extracellular	1.Extracellular, 3.Intra Cellular	0.278195	1	4	ENSG00000108389	GENE-nonsense_mediated_decay,processed_transcript,protein_coding,retained_intron	9110	MTMR4	MTMR4		false	9110	147	0	1	ASSOCIATED_NEW_GENE	0	0.991763	false	0	9110	0	0	[A0A804HJV7, J3KT95, J3QKV8, J3QR65, J3QRJ2, Q9NYA4]	9110
			4.24865	0			3.Intra Cellular	3.Intra Cellular	0.235369	1	6	ENSG00000198793	GENE-processed_transcript,protein_coding	2475	MTOR	MTOR		false	2475	48	0	1	ASSOCIATED_NEW_GENE	0	0.989687	false	0	2475	0	0	[B1AKP8, B1AKQ2, P42345]	2475
			3.59459	0			3.Intra Cellular	3.Intra Cellular	0.278195	1	4	ENSG00000105887	GENE-protein_coding	136319	MTPN	MTPN		false	136319	147	0	1	ASSOCIATED_NEW_GENE	0	0.991763	false	0	136319	0	0	[C9JL85, P58546, Q69YG1]	136319
			5.45946	0			2.Plasma Membrane	2.Plasma Membrane, 3.Intra Cellular	0.183168	1	6	ENSG00000168631	GENE-protein_coding	135656	MUCL3	MUCL3		false	135656	25	0	1	ASSOCIATED_NEW_GENE	0	0.985843	false	0	135656	0	0	[A0A0G2JIW6, A0A0G2JN73, A0A140T950, A0A140TA28, A0A1B0GV46, E9PEI6, Q3MIW9]	135656
			3.20811	0	Transcription Factor Complex		3.Intra Cellular	3.Intra Cellular, 5.Nucleus	0.31171	1	6	ENSG00000136997	GENE-processed_transcript,protein_coding	4609	MYC	MYC		false	4609	315	0	1	ASSOCIATED_NEW_GENE	0	0.99299	false	0	4609	0	0	[A0A024R9L7, A0A087WUS5, A0A0B4J1R1, A0A224B085, A0A494C1T8, A0N2G3, B0B0N9, B3CJ63, B3CJ64, B3CJ65, B3CJ66, B3CJ69, B3CJ71, B3CJ72, B3CJ73, B3CJ74, B3CJ75, B3CJ76, B3CJ77, B3CJ78, B3CJ81, B3CJ82, B3CJ86, B3CJ87, B3CJ88, B3CJ89, B3CJ90, B3CJ91, B3CJ92, B3CJ93, B3CJ94, B3CJA1, B3CJA3, B3CJA4, B3CJA7, B3CJA8, B3CJA9, B3CJB0, B3CJB1, B3CJB2, B3CJB3, B3CJB8, B3CJB9, B3CJC0, B3CJC6, B3CJC7, B3CJC8, B3…	4609
			3.20811	0			1.Extracellular	1.Extracellular, 2.Plasma Membrane, 3.Intra Cellular, 4.Nuclear Membrane	0.31171	1	6	ENSG00000138119	GENE-nonsense_mediated_decay,processed_transcript,protein_coding,retained_intron	26509	MYOF	MYOF		false	26509	315	0	1	ASSOCIATED_NEW_GENE	0	0.99299	false	0	26509	0	0	[H0YD14, Q9NZM1]	26509
			3.76757	0			2.Plasma Membrane	2.Plasma Membrane, 3.Intra Cellular	0.265423	1	6	ENSG00000138347	GENE-nonsense_mediated_decay,processed_transcript,protein_coding,retained_intron	84665	MYPN	MYPN		false	84665	108	0	1	ASSOCIATED_NEW_GENE	0	0.991214	false	0	84665	0	0	[A0A087WX60, A0A804CFL5, A5PKT7, L8EAK0, L8ECL4, Q86TC9]	84665
			3.81622	0			3.Intra Cellular	3.Intra Cellular	0.26204	1	6	ENSG00000204899	GENE-protein_coding	440145	MZT1	MZT1		false	440145	132	0	1	ASSOCIATED_NEW_GENE	0	0.99106	false	0	440145	0	0	[Q08AG7]	440145
			3.81622	0			3.Intra Cellular	3.Intra Cellular	0.26204	1	6	ENSG00000008130	GENE-nonsense_mediated_decay,processed_transcript,protein_coding,retained_intron	65220	NADK	NADK		false	65220	132	0	1	ASSOCIATED_NEW_GENE	0	0.99106	false	0	65220	0	0	[A0A024R058, A0A0A0MR98, J3KSP9, J3KTI3, J3QR86, J3QRC0, O95544, Q6PJ22]	65220
			3.20811	0			1.Extracellular	1.Extracellular, 3.Intra Cellular	0.31171	1	6	ENSG00000105835	GENE-nonsense_mediated_decay,processed_transcript,protein_coding,retained_intron	10135	NAMPT	NAMPT		false	10135	315	0	1	ASSOCIATED_NEW_GENE	0	0.99299	false	0	10135	0	0	[A0A024R718, A0A0C4DFS8, A0A7P0T862, A0A7P0T895, A0A7P0T8D2, A0A7P0T8L3, A0A7P0T8R4, A0A7P0T8Z3, A0A7P0T931, A0A7P0T941, A0A7P0T973, A0A7P0T9F0, A0A7P0T9I9, A0A7P0TA73, A0A7P0TAI8, A0A7P0TAS5, A0A7P0TAZ2, A0A7P0TB17, A0A7P0TBB7, A0A7P0Z437, A0A7P0Z466, A0A7P0Z4L4, A0A7P0Z4N0, B7Z8W6, C9JF35, C9JG65, P43490]	10135
			3.20811	0			5.Nucleus	5.Nucleus	0.31171	1	6	ENSG00000111704	GENE-processed_transcript,protein_coding	79923	NANOG	NANOG		false	79923	315	0	1	ASSOCIATED_NEW_GENE	0	0.99299	false	0	79923	0	0	[A8K4D1, F5GZI2, J7H4A9, J7H4F6, J7HA22, J7HA98, Q9H9S0]	79923
			3.59459	0			1.Extracellular	1.Extracellular, 3.Intra Cellular	0.278195	1	4	ENSG00000134440	GENE-nonsense_mediated_decay,protein_coding,retained_intron	4677	NARS1	NARS1		false	4677	147	0	1	ASSOCIATED_NEW_GENE	0	0.991763	false	0	4677	0	0	[K7EIU7, K7EJ19, K7EMQ6, K7ENF0, K7EPK2, K7EQ35, O43776]	4677
			3.20811	0			3.Intra Cellular	3.Intra Cellular	0.31171	1	6	ENSG00000114503	GENE-nonsense_mediated_decay,processed_transcript,protein_coding,retained_intron	22916	NCBP2	NCBP2		false	22916	315	0	1	ASSOCIATED_NEW_GENE	0	0.99299	false	0	22916	0	0	[B3KSB0, C9JKF4, C9JQX9, F8WE41, P52298]	22916
			3.76757	0			3.Intra Cellular	3.Intra Cellular	0.265423	1	6	ENSG00000020129	GENE-processed_transcript,protein_coding	23154	NCDN	NCDN		false	23154	108	0	1	ASSOCIATED_NEW_GENE	0	0.991214	false	0	23154	0	0	[C9J5H8, H7C2R2, Q9UBB6]	23154
			4.24865	0			3.Intra Cellular	3.Intra Cellular	0.235369	1	6	ENSG00000198695	GENE-protein_coding	4541	ND6	ND6		false	4541	48	0	1	ASSOCIATED_NEW_GENE	0	0.989687	false	0	4541	0	0	[A0A023I7W4, A0A023I852, A0A023I8N0, A0A023I8P3, A0A023Q568, A0A023QFF6, A0A023QQE5, A0A023QRK5, A0A023QX54, A0A023R385, A0A023R5S7, A0A059QF73, A0A059QLG0, A0A059QPR0, A0A059QQW3, A0A059QTJ2, A0A059RBF9, A0A059RG71, A0A059RI68, A0A059RIA0, A0A059RJ10, A0A059RMZ8, A0A059RNN8, A0A059RNZ2, A0A059RR87, A0A059S6I0, A0A068BPU9, A0A068C695, A0A075C7T2, A0A075X6N0, A0A096W049, A0A096WNH2, A0A097Q221, A0…	4541
			3.20811	0			1.Extracellular	1.Extracellular, 2.Plasma Membrane, 3.Intra Cellular	0.31171	1	6	ENSG00000104419	GENE-nonsense_mediated_decay,processed_transcript,protein_coding,retained_intron	10397	NDRG1	NDRG1		false	10397	315	0	1	ASSOCIATED_NEW_GENE	0	0.99299	false	0	10397	0	0	[A0A024R9I3, A0A6Q8PF06, A0A6Q8PF16, A0A6Q8PF28, A0A6Q8PF71, A0A6Q8PFB3, A0A6Q8PFG2, A0A6Q8PFP2, A0A6Q8PFR8, A0A6Q8PGD3, A0A6Q8PGF1, A0A6Q8PGJ1, A0A6Q8PHF2, A0A6Q8PHI0, A0A7I2ST14, B3KWB2, E5RG99, E5RGG6, E5RGM5, E5RH82, E5RI76, E5RIM2, E5RIR1, E5RIV1, E5RJ98, E5RJY1, E5RK17, E7ESM1, Q8N959, Q92597]	10397
			3.76757	0			2.Plasma Membrane	2.Plasma Membrane, 3.Intra Cellular	0.265423	1	6	ENSG00000235568	GENE-nonsense_mediated_decay,protein_coding	150372	NFAM1	NFAM1		false	150372	108	0	1	ASSOCIATED_NEW_GENE	0	0.991214	false	0	150372	0	0	[F8WE95, Q8NET5]	150372
			3.59459	0			1.Extracellular	1.Extracellular, 3.Intra Cellular	0.278195	1	4	ENSG00000164190	GENE-processed_transcript,protein_coding,retained_intron	25836	NIPBL	NIPBL		false	25836	147	0	1	ASSOCIATED_NEW_GENE	0	0.991763	false	0	25836	0	0	[A0A590UJS4, A2RRA7, A6QL62, H0Y8M3, Q6IEH8, Q6KC79]	25836
			3.20811	0			3.Intra Cellular	3.Intra Cellular	0.31171	1	6	ENSG00000112992	GENE-nonsense_mediated_decay,processed_transcript,protein_coding,retained_intron	23530	NNT	NNT		false	23530	315	0	1	ASSOCIATED_NEW_GENE	0	0.99299	false	0	23530	0	0	[A0A024R0C3, A0A590UJA4, A0A590UJI3, A0A590UJM2, A0A590UJM7, A0A590UJV8, A0A590UK15, A0A590UK29, A0A590UKC7, D6RAI5, D6RCR6, D6RHU2, E9PCX7, H0Y9R2, Q13423, Q2TB59, Q8N5H5]	23530
			4.24865	0			2.Plasma Membrane	2.Plasma Membrane	0.235369	1	6	ENSG00000107281	GENE-protein_coding,retained_intron	56654	NPDC1	NPDC1		false	56654	48	0	1	ASSOCIATED_NEW_GENE	0	0.989687	false	0	56654	0	0	[A0A087WYK7, Q5SPY9, Q9NQX5]	56654
			3.81622	0			1.Extracellular	1.Extracellular, 3.Intra Cellular	0.26204	1	6	ENSG00000168743	GENE-processed_transcript,protein_coding,retained_intron	255743	NPNT	NPNT		false	255743	132	0	1	ASSOCIATED_NEW_GENE	0	0.99106	false	0	255743	0	0	[D6RE63, D6RH31, H0Y8M1, H0YA60, H0YAK9, Q6UXI9]	255743
			3.59459	0			1.Extracellular	1.Extracellular	0.278195	1	4	ENSG00000105954	GENE-protein_coding	64111	NPVF	NPVF		false	64111	147	0	1	ASSOCIATED_NEW_GENE	0	0.991763	false	0	64111	0	0	[Q9HCQ7]	64111
			3.59459	0	Transcription Factor Complex		3.Intra Cellular	3.Intra Cellular	0.278195	1	4	ENSG00000131408	GENE-nonsense_mediated_decay,processed_transcript,protein_coding,retained_intron	7376	NR1H2	NR1H2		false	7376	147	0	1	ASSOCIATED_NEW_GENE	0	0.991763	false	0	7376	0	0	[B6ZGS7, F1D8P7, M0QYE6, M0QZF5, M0R0K3, M0R1V8, M0R229, M0R2F9, M0R3A7, P55055, Q6IBU6]	7376
			3.76757	0	Transcription Factor Complex		3.Intra Cellular	3.Intra Cellular	0.265423	1	6	ENSG00000153234	GENE-nonsense_mediated_decay,protein_coding	4929	NR4A2	NR4A2		false	4929	108	0	1	ASSOCIATED_NEW_GENE	0	0.991214	false	0	4929	0	0	[A0A0S2Z418, C0KWD1, C0KWD2, C9IYM5, C9J8W4, C9JWQ1, E9PBQ4, F1D8N6, F1DAL2, F8W6I3, H7BZ00, P43354, Q53EL4]	4929
			3.81622	0			1.Extracellular	1.Extracellular, 2.Plasma Membrane, 3.Intra Cellular	0.26204	1	6	ENSG00000213281	GENE-protein_coding	4893	NRAS	NRAS		false	4893	132	0	1	ASSOCIATED_NEW_GENE	0	0.99106	false	0	4893	0	0	[P01111, Q5U091]	4893
			3.20811	0			3.Intra Cellular	3.Intra Cellular	0.31171	1	6	ENSG00000076685	GENE-nonsense_mediated_decay,processed_transcript,protein_coding,retained_intron	22978	NT5C2	NT5C2		false	22978	315	0	1	ASSOCIATED_NEW_GENE	0	0.99299	false	0	22978	0	0	[A0A384MED8, A0A6Q8PEZ2, A0A6Q8PF50, A0A6Q8PFH2, A0A6Q8PG36, A0A6Q8PHB5, A0A6Q8PHP0, A8K6K2, H0YHR8, P49902, Q5JUV4, Q5JUV6, S4R3A6, S4R3E7]	22978
			3.59459	0			2.Plasma Membrane	2.Plasma Membrane, 3.Intra Cellular	0.278195	1	4	ENSG00000151413	GENE-nonsense_mediated_decay,processed_transcript,protein_coding,retained_intron	80224	NUBPL	NUBPL		false	80224	147	0	1	ASSOCIATED_NEW_GENE	0	0.991763	false	0	80224	0	0	[B3KSK2, B4DWB0, F8VP02, F8VZR8, F8W061, F8W0A2, H0YHR7, Q8TB37, X5D2R5, X5D995, X5DR74]	80224
			3.59459	0			3.Intra Cellular	3.Intra Cellular	0.278195	1	4	ENSG00000272325	GENE-protein_coding	11165	NUDT3	NUDT3		false	11165	147	0	1	ASSOCIATED_NEW_GENE	0	0.991763	false	0	11165	0	0	[O95989]	11165
			3.20811	0			1.Extracellular	1.Extracellular, 3.Intra Cellular	0.31171	1	6	ENSG00000165609	GENE-nonsense_mediated_decay,processed_transcript,protein_coding	11164	NUDT5	NUDT5		false	11164	315	0	1	ASSOCIATED_NEW_GENE	0	0.99299	false	0	11164	0	0	[A6NCQ0, A6NFX8, A6NJU6, C9JYY9, H0YEY4, Q9UKK9]	11164
			3.20811	0			3.Intra Cellular	3.Intra Cellular, 4.Nuclear Membrane	0.31171	1	6	ENSG00000136243	GENE-nonsense_mediated_decay,processed_transcript,protein_coding,retained_intron	11097	NUP42	NUP42		false	11097	315	0	1	ASSOCIATED_NEW_GENE	0	0.99299	false	0	11097	0	0	[A0A087WZL5, B4DT96, C9JYA1, F8WC66, O15504]	11097
			3.20811	0			3.Intra Cellular	3.Intra Cellular, 4.Nuclear Membrane	0.31171	1	6	ENSG00000213024	GENE-processed_transcript,protein_coding	23636	NUP62	NUP62		false	23636	315	0	1	ASSOCIATED_NEW_GENE	0	0.99299	false	0	23636	0	0	[A0A024QZF1, M0QX10, M0QX13, M0QX64, M0QXN5, M0QYY0, M0QZL5, M0R0B7, M0R1S1, M0R302, P37198]	23636
			4.24865	0			3.Intra Cellular	3.Intra Cellular	0.235369	1	6	ENSG00000065154	GENE-processed_transcript,protein_coding	4942	OAT	OAT		false	4942	48	0	1	ASSOCIATED_NEW_GENE	0	0.989687	false	0	4942	0	0	[A0A140VJQ4, P04181]	4942
			3.81622	0			2.Plasma Membrane	2.Plasma Membrane, 3.Intra Cellular	0.26204	1	6	ENSG00000122126	GENE-nonsense_mediated_decay,processed_transcript,protein_coding	4952	OCRL	OCRL		false	4952	132	0	1	ASSOCIATED_NEW_GENE	0	0.99106	false	0	4952	0	0	[A0A2R8YCN4, A0A2R8YF88, A0A2R8YG38, A0A2X0TVZ9, Q01968, Q504W7, Q6PJ10]	4952
			3.59459	0			0.Annotation definition not found in 'Homo Sapiens.properties' file	0.Annotation definition not found in 'Homo Sapiens.properties' file	0.278195	1	4	ENSG00000177468	GENE-protein_coding	167826	OLIG3	OLIG3		false	167826	147	0	1	ASSOCIATED_NEW_GENE	0	0.991763	false	0	167826	0	0	[Q7RTU3]	167826
			3.59459	0			3.Intra Cellular	3.Intra Cellular	0.278195	1	4	ENSG00000125741	GENE-protein_coding	80207	OPA3	OPA3		false	80207	147	0	1	ASSOCIATED_NEW_GENE	0	0.991763	false	0	80207	0	0	[B4DK77, Q9H6K4]	80207
			3.81622	0			3.Intra Cellular	3.Intra Cellular	0.26204	1	6	ENSG00000123353	GENE-protein_coding,retained_intron	29095	ORMDL2	ORMDL2		false	29095	132	0	1	ASSOCIATED_NEW_GENE	0	0.99106	false	0	29095	0	0	[F8VWV8, F8VXD5, Q53FV1]	29095
			3.59459	0			3.Intra Cellular	3.Intra Cellular	0.278195	1	4	ENSG00000145569	GENE-processed_transcript,protein_coding	54491	OTULINL	OTULINL		false	54491	147	0	1	ASSOCIATED_NEW_GENE	0	0.991763	false	0	54491	0	0	[Q9NUU6]	54491
			3.81622	0			3.Intra Cellular	3.Intra Cellular	0.26204	1	6	ENSG00000187866	GENE-protein_coding	116224	PABIR1	PABIR1		false	116224	132	0	1	ASSOCIATED_NEW_GENE	0	0.99106	false	0	116224	0	0	[B3KX07, Q96E09]	116224
			3.81622	0			0.Annotation definition not found in 'Homo Sapiens.properties' file	0.Annotation definition not found in 'Homo Sapiens.properties' file	0.26204	1	6	ENSG00000156504	GENE-processed_transcript,protein_coding	159090	PABIR2	PABIR2		false	159090	132	0	1	ASSOCIATED_NEW_GENE	0	0.99106	false	0	159090	0	0	[B4DN12, G1UD79, G1UD80, Q7Z309]	159090
			3.76757	0			3.Intra Cellular	3.Intra Cellular	0.265423	1	6	ENSG00000179364	GENE-nonsense_mediated_decay,processed_transcript,protein_coding,retained_intron	23241	PACS2	PACS2		false	23241	108	0	1	ASSOCIATED_NEW_GENE	0	0.991214	false	0	23241	0	0	[F8VW41, F8W0B1, Q86VP3, Q8N7J0]	23241
			3.59459	0			1.Extracellular	1.Extracellular, 3.Intra Cellular, 4.Nuclear Membrane	0.278195	1	4	ENSG00000007168	GENE-nonsense_mediated_decay,processed_transcript,protein_coding,retained_intron	5048	PAFAH1B1	PAFAH1B1		false	5048	147	0	1	ASSOCIATED_NEW_GENE	0	0.991763	false	0	5048	0	0	[A0A6Q8PFT2, A0A6Q8PFU3, A0A6Q8PG63, A0A6Q8PGF8, A0A6Q8PH33, I3L384, I3L3N5, I3L495, P43034]	5048
			3.59459	0			3.Intra Cellular	3.Intra Cellular	0.278195	1	4	ENSG00000124374	GENE-protein_coding	400961	PAIP2B	PAIP2B		false	400961	147	0	1	ASSOCIATED_NEW_GENE	0	0.991763	false	0	400961	0	0	[Q9ULR5]	400961
			3.59459	0			2.Plasma Membrane	2.Plasma Membrane, 3.Intra Cellular, 5.Nucleus	0.278195	1	4	ENSG00000137843	GENE-processed_transcript,protein_coding,retained_intron	56924	PAK6	PAK6		false	56924	147	0	1	ASSOCIATED_NEW_GENE	0	0.991763	false	0	56924	0	0	[A0A024R9Q4, H0YK38, H0YK74, H0YK91, H0YKB6, H0YL02, H0YL16, H0YL47, H0YLZ9, H0YM99, H0YMS4, Q9NQU5]	56924
			3.20811	0			1.Extracellular	1.Extracellular, 3.Intra Cellular	0.31171	1	6	ENSG00000197111	GENE-nonsense_mediated_decay,protein_coding,retained_intron	5094	PCBP2	PCBP2		false	5094	315	0	1	ASSOCIATED_NEW_GENE	0	0.99299	false	0	5094	0	0	[A0A384N6B9, F8VRH0, F8VTZ0, F8VXH9, F8VZX2, F8W0G4, F8W1G6, H3BND9, H3BRU6, H3BSP4, H3BSS4, L8E745, Q15366]	5094
			3.59459	0			1.Extracellular	1.Extracellular, 3.Intra Cellular	0.278195	1	4	ENSG00000186472	GENE-nonsense_mediated_decay,processed_transcript,protein_coding	27445	PCLO	PCLO		false	27445	147	0	1	ASSOCIATED_NEW_GENE	0	0.991763	false	0	27445	0	0	[E9PE96, H7C114, H7C261, L8E9M5, Q32P40, Q9Y6V0]	27445
			3.76757	0			3.Intra Cellular	3.Intra Cellular	0.265423	1	6	ENSG00000115252	GENE-nonsense_mediated_decay,protein_coding	5136	PDE1A	PDE1A		false	5136	108	0	1	ASSOCIATED_NEW_GENE	0	0.991214	false	0	5136	0	0	[B7Z226, B7Z7A2, P54750, Q53T15, Q53TB0, Q9UNL9, Q9Y246, Q9Y633, Q9Y634]	5136
			3.20811	0			2.Plasma Membrane	2.Plasma Membrane, 3.Intra Cellular	0.31171	1	6	ENSG00000134853	GENE-nonsense_mediated_decay,protein_coding,retained_intron	5156	PDGFRA	PDGFRA		false	5156	315	0	1	ASSOCIATED_NEW_GENE	0	0.99299	false	0	5156	0	0	[A0A387LBM6, D6RDX0, D6RG11, D6RIG5, D6RJH0, P16234]	5156
			3.20811	0			2.Plasma Membrane	2.Plasma Membrane, 3.Intra Cellular	0.31171	1	6	ENSG00000113721	GENE-nonsense_mediated_decay,processed_transcript,protein_coding,retained_intron	5159	PDGFRB	PDGFRB		false	5159	315	0	1	ASSOCIATED_NEW_GENE	0	0.99299	false	0	5159	0	0	[E5RH16, E5RII0, E5RJ14, P09619, Q59F04]	5159
			3.76757	0			3.Intra Cellular	3.Intra Cellular	0.265423	1	6	ENSG00000163110	GENE-nonsense_mediated_decay,processed_transcript,protein_coding,retained_intron	10611	PDLIM5	PDLIM5		false	10611	108	0	1	ASSOCIATED_NEW_GENE	0	0.991214	false	0	10611	0	0	[A0A024RDE8, A0A0A0MSP3, A0A0D9SFR4, A0A0D9SFW3, B7Z481, B7Z8X5, D6RAA1, D6RGG6, H0Y8Y3, H0Y929, H0YBI4, Q96HC4]	10611
			3.81622	0			3.Intra Cellular	3.Intra Cellular	0.26204	1	6	ENSG00000165650	GENE-processed_transcript,protein_coding	118987	PDZD8	PDZD8		false	118987	132	0	1	ASSOCIATED_NEW_GENE	0	0.99106	false	0	118987	0	0	[Q8NEN9]	118987
			3.20811	0			1.Extracellular	1.Extracellular, 3.Intra Cellular	0.31171	1	6	ENSG00000242265	GENE-processed_transcript,protein_coding	23089	PEG10	PEG10		false	23089	315	0	1	ASSOCIATED_NEW_GENE	0	0.99299	false	0	23089	0	0	[A0A087WUL4, A0A087WX23, A0A087WXK2, A0A087WYS2, A0A087WZG9, Q86TG7]	23089
			3.59459	0			3.Intra Cellular	3.Intra Cellular	0.278195	1	4	ENSG00000179094	GENE-nonsense_mediated_decay,processed_transcript,protein_coding,retained_intron	5187	PER1	PER1		false	5187	147	0	1	ASSOCIATED_NEW_GENE	0	0.991763	false	0	5187	0	0	[A2I2P6, J3KRL7, J3KSL6, J3KTM2, J3QL46, J3QL55, J3QLQ5, J3QSH9, O15534, Q6IN51, Q9H2D0]	5187
			3.76757	0			3.Intra Cellular	3.Intra Cellular, 5.Nucleus	0.265423	1	6	ENSG00000132326	GENE-processed_transcript,protein_coding,retained_intron	8864	PER2	PER2		false	8864	108	0	1	ASSOCIATED_NEW_GENE	0	0.991214	false	0	8864	0	0	[E9PD89, L8E8R3, O15055]	8864
			3.59459	0			2.Plasma Membrane	2.Plasma Membrane, 3.Intra Cellular	0.278195	1	4	ENSG00000112378	GENE-protein_coding	64065	PERP	PERP		false	64065	147	0	1	ASSOCIATED_NEW_GENE	0	0.991763	false	0	64065	0	0	[Q96FX8]	64065
			3.59459	0			2.Plasma Membrane	2.Plasma Membrane, 3.Intra Cellular	0.278195	1	4	ENSG00000112419	GENE-protein_coding,retained_intron	9749	PHACTR2	PHACTR2		false	9749	147	0	1	ASSOCIATED_NEW_GENE	0	0.991763	false	0	9749	0	0	[F5H858, F6TH74, H9KVA6, J3KP75, O75167]	9749
			3.20811	0			0.Annotation definition not found in 'Homo Sapiens.properties' file	0.Annotation definition not found in 'Homo Sapiens.properties' file	0.31171	1	6	ENSG00000119403	GENE-processed_transcript,protein_coding,retained_intron	26147	PHF19	PHF19		false	26147	315	0	1	ASSOCIATED_NEW_GENE	0	0.99299	false	0	26147	0	0	[A0A087X169, B0QZ50, B0QZ51, B0QZ72, B7Z887, B7Z8H3, F5H8K3, Q5T6S3, X6RER8]	26147
			3.76757	0			1.Extracellular	1.Extracellular, 2.Plasma Membrane, 3.Intra Cellular	0.265423	1	6	ENSG00000162896	GENE-processed_transcript,protein_coding	5284	PIGR	PIGR		false	5284	108	0	1	ASSOCIATED_NEW_GENE	0	0.991214	false	0	5284	0	0	[P01833, Q8TE27]	5284
			3.59459	0			2.Plasma Membrane	2.Plasma Membrane	0.278195	1	4	ENSG00000121716	GENE-protein_coding,retained_intron	29990	PILRB	PILRB		false	29990	147	0	1	ASSOCIATED_NEW_GENE	0	0.991763	false	0	29990	0	0	[C9J8P3, C9JGQ4, C9JNA4, C9JPU0, C9JTD2, L8EAS8, Q9UKJ0, V9GYC2]	29990
			3.81622	0			2.Plasma Membrane	2.Plasma Membrane, 3.Intra Cellular	0.26204	1	6	ENSG00000150867	GENE-processed_transcript,protein_coding	5305	PIP4K2A	PIP4K2A		false	5305	132	0	1	ASSOCIATED_NEW_GENE	0	0.99106	false	0	5305	0	0	[H7BXS3, L8EAD2, P48426, S4R320]	5305
			4.24865	0			2.Plasma Membrane	2.Plasma Membrane, 3.Intra Cellular	0.235369	1	6	ENSG00000276293	GENE-processed_transcript,protein_coding	8396	PIP4K2B	PIP4K2B		false	8396	48	0	1	ASSOCIATED_NEW_GENE	0	0.989687	false	0	8396	0	0	[A0A087WT35, P78356]	8396
			3.20811	0			1.Extracellular	1.Extracellular	0.31171	1	6	ENSG00000117215	GENE-protein_coding	26279	PLA2G2D	PLA2G2D		false	26279	315	0	1	ASSOCIATED_NEW_GENE	0	0.99299	false	0	26279	0	0	[Q9UNK4]	26279
			4.24865	0			2.Plasma Membrane	2.Plasma Membrane, 3.Intra Cellular	0.235369	1	6	ENSG00000168907	GENE-nonsense_mediated_decay,protein_coding,retained_intron	255189	PLA2G4F	PLA2G4F		false	255189	48	0	1	ASSOCIATED_NEW_GENE	0	0.989687	false	0	255189	0	0	[A2RRC4, A5PKZ7, A6H8K5, H3BMD0, H3BNW4, H3BPX7, H3BSG9, H7BXJ8, Q68DD2, Q8IUP3]	255189
			3.76757	0			3.Intra Cellular	3.Intra Cellular	0.265423	1	6	ENSG00000116095	GENE-nonsense_mediated_decay,processed_transcript,protein_coding	65977	PLEKHA3	PLEKHA3		false	65977	108	0	1	ASSOCIATED_NEW_GENE	0	0.991214	false	0	65977	0	0	[F8WCR7, H7C0Q0, Q9HB20]	65977
			3.59459	0			0.Annotation definition not found in 'Homo Sapiens.properties' file	0.Annotation definition not found in 'Homo Sapiens.properties' file	0.278195	1	4	ENSG00000143850	GENE-processed_transcript,protein_coding	22874	PLEKHA6	PLEKHA6		false	22874	147	0	1	ASSOCIATED_NEW_GENE	0	0.991763	false	0	22874	0	0	[A0A1B0GUN5, A0A1B0GW03, A0A5F9ZH45, A5XEJ2, A5XEJ3, A5XEJ4, A5XEJ5, A5XEJ6, A5XEJ7, A5XEJ8, Q5VTI5, Q96FR0, Q9Y2H5]	22874
			3.76757	0			3.Intra Cellular	3.Intra Cellular	0.265423	1	6	ENSG00000090924	GENE-protein_coding,retained_intron	64857	PLEKHG2	PLEKHG2		false	64857	108	0	1	ASSOCIATED_NEW_GENE	0	0.991214	false	0	64857	0	0	[C9J7S4, C9JVL3, E7ESZ3, H7BXC7, M0QX05, M0QZT7, M0R0V0, M0R348, M0R391, M0R3G5, M0R3J0, Q9H7P9]	64857
			3.20811	0			3.Intra Cellular	3.Intra Cellular	0.31171	1	6	ENSG00000105355	GENE-protein_coding	10226	PLIN3	PLIN3		false	10226	315	0	1	ASSOCIATED_NEW_GENE	0	0.99299	false	0	10226	0	0	[A0A140VJN8, K7EJD0, K7EL96, K7ER39, K7ERZ3, O60664]	10226
			3.20811	0			3.Intra Cellular	3.Intra Cellular	0.31171	1	6	ENSG00000147471	GENE-nonsense_mediated_decay,protein_coding,retained_intron	11212	PLPBP	PLPBP		false	11212	315	0	1	ASSOCIATED_NEW_GENE	0	0.99299	false	0	11212	0	0	[E5RFX7, E5RFZ4, E5RG77, H0YBG2, O94903]	11212
			3.81622	0			2.Plasma Membrane	2.Plasma Membrane	0.26204	1	6	ENSG00000114698	GENE-protein_coding,retained_intron	57088	PLSCR4	PLSCR4		false	57088	132	0	1	ASSOCIATED_NEW_GENE	0	0.99106	false	0	57088	0	0	[C9J3P9, C9J664, C9J6E1, C9J916, C9JNW2, D3DNG6, E9PHR9, Q9NRQ2]	57088
			3.81622	0			2.Plasma Membrane	2.Plasma Membrane	0.26204	1	6	ENSG00000130827	GENE-processed_transcript,protein_coding,retained_intron	55558	PLXNA3	PLXNA3		false	55558	132	0	1	ASSOCIATED_NEW_GENE	0	0.99106	false	0	55558	0	0	[L8ECH0, P51805]	55558
			5.45946	0			1.Extracellular	1.Extracellular, 2.Plasma Membrane, 3.Intra Cellular	0.183168	1	6	ENSG00000127838	GENE-nonsense_mediated_decay,processed_transcript,protein_coding,retained_intron	25953	PNKD	PNKD		false	25953	25	0	1	ASSOCIATED_NEW_GENE	0	0.985843	false	0	25953	0	0	[A0A024R415, L8EAT5, Q8N490]	25953
			3.81622	0			0.Annotation definition not found in 'Homo Sapiens.properties' file	0.Annotation definition not found in 'Homo Sapiens.properties' file	0.26204	1	6	ENSG00000182013	GENE-protein_coding	55228	PNMA8A	PNMA8A		false	55228	132	0	1	ASSOCIATED_NEW_GENE	0	0.99106	false	0	55228	0	0	[M0R388, Q86V59]	55228
			3.76757	0			1.Extracellular	1.Extracellular, 3.Intra Cellular	0.265423	1	6	ENSG00000198805	GENE-protein_coding,retained_intron	4860	PNP	PNP		false	4860	108	0	1	ASSOCIATED_NEW_GENE	0	0.991214	false	0	4860	0	0	[G3V2H3, G3V393, G3V5M2, P00491, V9HWH6]	4860
			3.20811	0			3.Intra Cellular	3.Intra Cellular	0.31171	1	6	ENSG00000032444	GENE-processed_transcript,protein_coding,retained_intron	10908	PNPLA6	PNPLA6		false	10908	315	0	1	ASSOCIATED_NEW_GENE	0	0.99299	false	0	10908	0	0	[A0A0B4NEY1, A0A0B4NF33, A0A0B4NFD1, A0A0B4NFS2, A0A2R8Y7E1, A0A384DVU0, M0QXH7, M0QYF5, M0QYT1, M0QZD1, M0QZK5, M0R2C2, M0R2H4, M0R2K2, Q8IY17]	10908
			3.59459	0			3.Intra Cellular	3.Intra Cellular	0.278195	1	4	ENSG00000138035	GENE-nonsense_mediated_decay,protein_coding,retained_intron	87178	PNPT1	PNPT1		false	87178	147	0	1	ASSOCIATED_NEW_GENE	0	0.991763	false	0	87178	0	0	[F8WBI3, H7BXF6, H7C3C5, Q8TCS8]	87178
			3.20811	0			3.Intra Cellular	3.Intra Cellular	0.31171	1	6	ENSG00000143442	GENE-nonsense_mediated_decay,protein_coding,retained_intron	23126	POGZ	POGZ		false	23126	315	0	1	ASSOCIATED_NEW_GENE	0	0.99299	false	0	23126	0	0	[A0A0G2JHK5, A0A2S0X0J5, A0A2S0X0P7, A6PW30, E9PIR8, E9PJY9, H0YCT3, H7C238, M0R2X2, Q7Z3K3]	23126
			3.59459	0			3.Intra Cellular	3.Intra Cellular	0.278195	1	4	ENSG00000077514	GENE-processed_transcript,protein_coding,retained_intron	10714	POLD3	POLD3		false	10714	147	0	1	ASSOCIATED_NEW_GENE	0	0.991763	false	0	10714	0	0	[A0A024R5M8, E9PM91, E9PNC0, E9PRK3, H0YD46, H0YEX7, Q05BV7, Q15054, Q569I8, Q8WUF6]	10714
			3.20811	0			1.Extracellular	1.Extracellular, 5.Nucleus	0.31171	1	6	ENSG00000104356	GENE-protein_coding,retained_intron	10940	POP1	POP1		false	10940	315	0	1	ASSOCIATED_NEW_GENE	0	0.99299	false	0	10940	0	0	[E5RK39, Q96F88, Q99575]	10940
			3.20811	0			2.Plasma Membrane	2.Plasma Membrane	0.31171	1	6	ENSG00000166351	GENE-protein_coding	317754	POTED	POTED		false	317754	315	0	1	ASSOCIATED_NEW_GENE	0	0.99299	false	0	317754	0	0	[A0A087X1W7, Q86YR6]	317754
			3.59459	0			0.Annotation definition not found in 'Homo Sapiens.properties' file	0.Annotation definition not found in 'Homo Sapiens.properties' file	0.278195	1	4	ENSG00000187537	GENE-nonsense_mediated_decay,protein_coding	404785	POTEG	POTEG		false	404785	147	0	1	ASSOCIATED_NEW_GENE	0	0.991763	false	0	404785	0	0	[Q6S5H5]	404785
			3.59459	0			0.Annotation definition not found in 'Homo Sapiens.properties' file	0.Annotation definition not found in 'Homo Sapiens.properties' file	0.278195	1	4	ENSG00000222036	GENE-nonsense_mediated_decay,protein_coding	641455	POTEM	POTEM		false	641455	147	0	1	ASSOCIATED_NEW_GENE	0	0.991763	false	0	641455	0	0	[A0A087X187, A0A0H2UH41, A6NI47, L0R5C4]	641455
			3.20811	0			3.Intra Cellular	3.Intra Cellular	0.31171	1	6	ENSG00000204531	GENE-processed_transcript,protein_coding,retained_intron	5460	POU5F1	POU5F1		false	5460	315	0	1	ASSOCIATED_NEW_GENE	0	0.99299	false	0	5460	0	0	[A0A0K0KMI2, A0A0K0KMS3, A0A0K0KMW9, A0A1W2PP83, A7WPL9, A7WPM0, A7WPM1, A7WPM2, A7WPM3, A7WPM4, A7WPM5, A7WPM6, A7WPM7, A7WPM8, A7WPM9, A7WPN0, B5B8N7, B5B8N8, B5B8N9, B5B8P0, B5B8P1, B5B8P2, B5B8P3, B5B8P4, B5B8P5, B5B8P6, B5B8P7, B5B8P8, B5B8P9, B5B8Q0, B5B8Q1, B5B8Q2, B5B8Q3, B5B8Q4, C3RUE0, D2IYK3, D5K9Q3, D5K9Q6, D5K9Q7, D5K9Q9, D5K9R1, D5K9R2, D5K9R3, D5K9R4, D5K9R5, D5K9R7, D5K9R8, D5K9R9…	5460
			3.81622	0			3.Intra Cellular	3.Intra Cellular	0.26204	1	6	ENSG00000128059	GENE-nonsense_mediated_decay,processed_transcript,protein_coding,retained_intron	5471	PPAT	PPAT		false	5471	132	0	1	ASSOCIATED_NEW_GENE	0	0.99106	false	0	5471	0	0	[A8K4H7, D6RCC8, D6RE15, Q06203, Q59G63]	5471
			4.24865	0			1.Extracellular	1.Extracellular, 2.Plasma Membrane, 3.Intra Cellular, 5.Nucleus	0.235369	1	6	ENSG00000213639	GENE-nonsense_mediated_decay,protein_coding,retained_intron	5500	PPP1CB	PPP1CB		false	5500	48	0	1	ASSOCIATED_NEW_GENE	0	0.989687	false	0	5500	0	0	[C9J9S3, C9JP48, E7ETD8, F8WE71, H0Y3Y6, P62140, V9HW04]	5500
			3.20811	0			0.Annotation definition not found in 'Homo Sapiens.properties' file	0.Annotation definition not found in 'Homo Sapiens.properties' file	0.31171	1	6	ENSG00000204569	GENE-processed_transcript,protein_coding,retained_intron	5514	PPP1R10	PPP1R10		false	5514	315	0	1	ASSOCIATED_NEW_GENE	0	0.99299	false	0	5514	0	0	[Q2L6I0, Q58F28, Q96QC0]	5514
			3.59459	0			3.Intra Cellular	3.Intra Cellular	0.278195	1	4	ENSG00000087074	GENE-protein_coding	23645	PPP1R15A	PPP1R15A		false	23645	147	0	1	ASSOCIATED_NEW_GENE	0	0.991763	false	0	23645	0	0	[M0QXL1, O75807]	23645
			3.81622	0			3.Intra Cellular	3.Intra Cellular	0.26204	1	6	ENSG00000158615	GENE-nonsense_mediated_decay,protein_coding,retained_intron	84919	PPP1R15B	PPP1R15B		false	84919	132	0	1	ASSOCIATED_NEW_GENE	0	0.99106	false	0	84919	0	0	[Q5SWA1]	84919
			3.81622	0			3.Intra Cellular	3.Intra Cellular	0.26204	1	6	ENSG00000104695	GENE-nonsense_mediated_decay,processed_transcript,protein_coding,retained_intron	5516	PPP2CB	PPP2CB		false	5516	132	0	1	ASSOCIATED_NEW_GENE	0	0.99106	false	0	5516	0	0	[A0A140VJS0, E5RFI3, E5RHC1, E5RJX4, H0YBN9, H0YC23, P62714]	5516
			3.81622	0			3.Intra Cellular	3.Intra Cellular	0.26204	1	6	ENSG00000100796	GENE-non_stop_decay,nonsense_mediated_decay,processed_transcript,protein_coding,retained_intron	55671	PPP4R3A	PPP4R3A		false	55671	132	0	1	ASSOCIATED_NEW_GENE	0	0.99106	false	0	55671	0	0	[A0A024R6M2, G3V231, G3V4R3, G3V5A2, G3V5Z3, H0YIY8, H0YJN6, Q6IN85, Q8N6W1]	55671
			3.81622	0			0.Annotation definition not found in 'Homo Sapiens.properties' file	0.Annotation definition not found in 'Homo Sapiens.properties' file	0.26204	1	6	ENSG00000148840	GENE-processed_transcript,protein_coding	23082	PPRC1	PPRC1		false	23082	132	0	1	ASSOCIATED_NEW_GENE	0	0.99106	false	0	23082	0	0	[E7EVG6, Q5VV67, X6R7H2]	23082
			3.76757	0	Transcription Factor Complex		3.Intra Cellular	3.Intra Cellular	0.265423	1	6	ENSG00000142611	GENE-processed_transcript,protein_coding,retained_intron	63976	PRDM16	PRDM16		false	63976	108	0	1	ASSOCIATED_NEW_GENE	0	0.991214	false	0	63976	0	0	[D6RDW0, D6RFY3, H0YA13, L8E8P9, Q9HAZ2, U3KQL6]	63976
			3.76757	0			3.Intra Cellular	3.Intra Cellular	0.265423	1	6	ENSG00000169230	GENE-nonsense_mediated_decay,processed_transcript,protein_coding,retained_intron	27166	PRELID1	PRELID1		false	27166	108	0	1	ASSOCIATED_NEW_GENE	0	0.991214	false	0	27166	0	0	[D6RC47, D6REW1, H0YA79, Q9Y255]	27166
			5.45946	0			2.Plasma Membrane	2.Plasma Membrane, 3.Intra Cellular	0.183168	1	6	ENSG00000108946	GENE-nonsense_mediated_decay,processed_transcript,protein_coding,retained_intron	5573	PRKAR1A	PRKAR1A		false	5573	25	0	1	ASSOCIATED_NEW_GENE	0	0.985843	false	0	5573	0	0	[A1XGZ0, B2R5T5, K7EID3, K7EIE5, K7EJ40, K7EK41, K7EKR1, K7EM13, K7EMU2, K7EMZ6, K7EPB2, K7EPR5, K7EQK3, P10644, Q96P62, X6RAV4]	5573
			5.45946	0			3.Intra Cellular	3.Intra Cellular, 5.Nucleus	0.183168	1	6	ENSG00000132600	GENE-nonsense_mediated_decay,processed_transcript,protein_coding,retained_intron	54496	PRMT7	PRMT7		false	54496	25	0	1	ASSOCIATED_NEW_GENE	0	0.985843	false	0	54496	0	0	[A0A024R6Z2, A0A024R726, A0A6Q8PFP4, H3BNC0, H3BPZ8, H3BRD3, H3BRQ9, H3BSS9, H3BTY1, Q9NVM4]	54496
			3.81622	0			3.Intra Cellular	3.Intra Cellular	0.26204	1	6	ENSG00000205352	GENE-protein_coding,retained_intron	54458	PRR13	PRR13		false	54458	132	0	1	ASSOCIATED_NEW_GENE	0	0.99106	false	0	54458	0	0	[A0A024RB45, F8VP70, F8VRX0, F8VU40, F8VWB5, F8VZP4, F8W1R5, Q9NZ81]	54458
			3.76757	0			2.Plasma Membrane	2.Plasma Membrane, 3.Intra Cellular	0.265423	1	6	ENSG00000167371	GENE-nonsense_mediated_decay,processed_transcript,protein_coding	112476	PRRT2	PRRT2		false	112476	108	0	1	ASSOCIATED_NEW_GENE	0	0.991214	false	0	112476	0	0	[A0A1B0GTE9, A0A1B0GTP1, A0A1B0GTR2, A0A1B0GTS0, A0A1B0GU25, A0A1B0GU37, A0A1B0GUR0, A0A1B0GUW9, H3BN10, Q7Z6L0]	112476
			3.76757	0			3.Intra Cellular	3.Intra Cellular	0.265423	1	6	ENSG00000013275	GENE-protein_coding,retained_intron	5704	PSMC4	PSMC4		false	5704	108	0	1	ASSOCIATED_NEW_GENE	0	0.991214	false	0	5704	0	0	[A8K2M0, P43686]	5704
			3.81622	0			3.Intra Cellular	3.Intra Cellular	0.26204	1	6	ENSG00000099341	GENE-nonsense_mediated_decay,protein_coding,retained_intron	5714	PSMD8	PSMD8		false	5714	132	0	1	ASSOCIATED_NEW_GENE	0	0.99106	false	0	5714	0	0	[K7EJC1, K7EJR3, K7EK21, K7ENY6, K7ERW6, P48556, R4GMR5, V9HW09]	5714
			3.76757	0			3.Intra Cellular	3.Intra Cellular	0.265423	1	6	ENSG00000183527	GENE-nonsense_mediated_decay,protein_coding,retained_intron	8624	PSMG1	PSMG1		false	8624	108	0	1	ASSOCIATED_NEW_GENE	0	0.991214	false	0	8624	0	0	[F8WBH7, H7C3B4, O95456]	8624
			3.81622	0			1.Extracellular	1.Extracellular, 2.Plasma Membrane, 3.Intra Cellular	0.26204	1	6	ENSG00000171862	GENE-nonsense_mediated_decay,processed_transcript,protein_coding,retained_intron	5728	PTEN	PTEN		false	5728	132	0	1	ASSOCIATED_NEW_GENE	0	0.99106	false	0	5728	0	0	[A0A024QYR6, A0A087X033, A0A142FGX1, A0A1V0DNR7, A0A2P0XNP6, A0A2R4SE35, A0A386NBZ2, A0A386NCS8, F6KD01, H6WA46, H6WA51, H6WA52, P60484]	5728
			3.76757	0			3.Intra Cellular	3.Intra Cellular	0.265423	1	6	ENSG00000187514	GENE-nonsense_mediated_decay,processed_transcript,protein_coding,retained_intron	5757	PTMA	PTMA		false	5757	108	0	1	ASSOCIATED_NEW_GENE	0	0.991214	false	0	5757	0	0	[A0A024R476, B8ZZA1, B8ZZQ6, B8ZZW7, F8WCE8, H7C031, H7C2N1, P06454, Q15254, Q53S24, Q7KZ52, Q8TBK9, Q9NYD3]	5757
			3.20811	0			3.Intra Cellular	3.Intra Cellular, 4.Nuclear Membrane	0.31171	1	6	ENSG00000055917	GENE-nonsense_mediated_decay,processed_transcript,protein_coding	23369	PUM2	PUM2		false	23369	315	0	1	ASSOCIATED_NEW_GENE	0	0.99299	false	0	23369	0	0	[A0A0C4DG68, B7ZL34, C9JE24, C9JW01, F2Z366, F8WD57, Q8TB72]	23369
			3.59459	0			0.Annotation definition not found in 'Homo Sapiens.properties' file	0.Annotation definition not found in 'Homo Sapiens.properties' file	0.278195	1	4	ENSG00000146676	GENE-protein_coding	5814	PURB	PURB		false	5814	147	0	1	ASSOCIATED_NEW_GENE	0	0.991763	false	0	5814	0	0	[Q96QR8]	5814
			3.81622	0			3.Intra Cellular	3.Intra Cellular	0.26204	1	6	ENSG00000112531	GENE-nonsense_mediated_decay,protein_coding,retained_intron	9444	QKI	QKI		false	9444	132	0	1	ASSOCIATED_NEW_GENE	0	0.99106	false	0	9444	0	0	[F5GXS8, F5GYM3, F5GYT7, F5H5U6, F5H8C8, H0YFB7, H0YG47, H0YGD6, Q8WY44, Q96PU8]	9444
			3.59459	0			1.Extracellular	1.Extracellular, 2.Plasma Membrane, 3.Intra Cellular	0.278195	1	4	ENSG00000080371	GENE-protein_coding,retained_intron	23011	RAB21	RAB21		false	23011	147	0	1	ASSOCIATED_NEW_GENE	0	0.991763	false	0	23011	0	0	[A0A024RBA9, Q9UL25]	23011
			3.81622	0			2.Plasma Membrane	2.Plasma Membrane, 3.Intra Cellular	0.26204	1	6	ENSG00000168461	GENE-nonsense_mediated_decay,processed_transcript,protein_coding,retained_intron	11031	RAB31	RAB31		false	11031	132	0	1	ASSOCIATED_NEW_GENE	0	0.99106	false	0	11031	0	0	[J3KRU3, J3KSM8, J3QR51, Q13636]	11031
			3.20811	0			2.Plasma Membrane	2.Plasma Membrane, 3.Intra Cellular	0.31171	1	6	ENSG00000118873	GENE-nonsense_mediated_decay,processed_transcript,protein_coding,retained_intron	25782	RAB3GAP2	RAB3GAP2		false	25782	315	0	1	ASSOCIATED_NEW_GENE	0	0.99299	false	0	25782	0	0	[F8WDJ2, H7C4Y9, Q9H2M9]	25782
			3.59459	0			0.Annotation definition not found in 'Homo Sapiens.properties' file	0.Annotation definition not found in 'Homo Sapiens.properties' file	0.278195	1	4	ENSG00000144134	GENE-nonsense_mediated_decay,processed_transcript,protein_coding,retained_intron	11159	RABL2A	RABL2A		false	11159	147	0	1	ASSOCIATED_NEW_GENE	0	0.991763	false	0	11159	0	0	[A0AUY0, B7ZBD4, B7ZBD5, E7EWW3, F2Z2E5, Q2TAB6, Q6IC14, Q9UBK7]	11159
			3.59459	0			3.Intra Cellular	3.Intra Cellular	0.278195	1	4	ENSG00000079974	GENE-nonsense_mediated_decay,processed_transcript,protein_coding,retained_intron	11158	RABL2B	RABL2B		false	11158	147	0	1	ASSOCIATED_NEW_GENE	0	0.991763	false	0	11158	0	0	[A0A0S2SW46, A8MXF6, C9JFZ0, F2Z2T3, F2Z3A9, F2Z3J7, Q9UNT1]	11158
			3.81622	0			3.Intra Cellular	3.Intra Cellular	0.26204	1	6	ENSG00000196642	GENE-nonsense_mediated_decay,processed_transcript,protein_coding,retained_intron	55684	RABL6	RABL6		false	55684	132	0	1	ASSOCIATED_NEW_GENE	0	0.99106	false	0	55684	0	0	[F2Z2T0, G3V154, H0Y7H6, Q3YEC7]	55684
			3.59459	0			1.Extracellular	1.Extracellular, 2.Plasma Membrane, 3.Intra Cellular	0.278195	1	4	ENSG00000136238	GENE-processed_transcript,protein_coding,retained_intron	5879	RAC1	RAC1		false	5879	147	0	1	ASSOCIATED_NEW_GENE	0	0.991763	false	0	5879	0	0	[A4D2P0, A4D2P1, A4D2P2, P63000]	5879
			5.45946	0			1.Extracellular	1.Extracellular, 2.Plasma Membrane, 3.Intra Cellular	0.183168	1	6	ENSG00000161800	GENE-nonsense_mediated_decay,processed_transcript,protein_coding,retained_intron	29127	RACGAP1	RACGAP1		false	29127	25	0	1	ASSOCIATED_NEW_GENE	0	0.985843	false	0	29127	0	0	[A0A024R136, A0A2X0U4T9, B2RE34, F8VQF5, F8VQZ5, F8VRD2, F8VRL2, F8VS54, F8VUW9, F8VV37, F8VV39, F8VV47, F8VVE5, F8VVY0, F8VWX0, F8VWY4, F8VXH1, F8VYH6, F8VZ41, F8VZ66, F8W0L1, F8W1E5, F8W1T4, H0YIK5, Q9H0H5]	29127
			4.24865	0			3.Intra Cellular	3.Intra Cellular	0.235369	1	6	ENSG00000162437	GENE-nonsense_mediated_decay,protein_coding	55225	RAVER2	RAVER2		false	55225	48	0	1	ASSOCIATED_NEW_GENE	0	0.989687	false	0	55225	0	0	[E9PE10, Q9HCJ3]	55225
			3.20811	0			3.Intra Cellular	3.Intra Cellular	0.31171	1	6	ENSG00000125826	GENE-nonsense_mediated_decay,processed_transcript,protein_coding,retained_intron	10616	RBCK1	RBCK1		false	10616	315	0	1	ASSOCIATED_NEW_GENE	0	0.99299	false	0	10616	0	0	[A6PVJ5, A6PVJ6, A6PVJ7, A6PVK0, B4DML5, G3XAG9, H0Y4S7, Q5JWR1, Q9BYM8]	10616
			3.59459	0			3.Intra Cellular	3.Intra Cellular	0.278195	1	4	ENSG00000100320	GENE-nonsense_mediated_decay,protein_coding,retained_intron	23543	RBFOX2	RBFOX2		false	23543	147	0	1	ASSOCIATED_NEW_GENE	0	0.991763	false	0	23543	0	0	[A0A0G2JRA5, A0A0G2JRD1, A0A0G2JSB3, B0QYV1, B0QYY4, B0QYY6, B0QYY7, F8WSN4, O43251, S4R3K7, S4R469]	23543
			3.20811	0			0.Annotation definition not found in 'Homo Sapiens.properties' file	0.Annotation definition not found in 'Homo Sapiens.properties' file	0.31171	1	6	ENSG00000244462	GENE-protein_coding	10137	RBM12	RBM12		false	10137	315	0	1	ASSOCIATED_NEW_GENE	0	0.99299	false	0	10137	0	0	[A6PVI0, A6PVI1, Q5JX62, Q9NTZ6]	10137
			3.59459	0			0.Annotation definition not found in 'Homo Sapiens.properties' file	0.Annotation definition not found in 'Homo Sapiens.properties' file	0.278195	1	4	ENSG00000183808	GENE-processed_transcript,protein_coding	389677	RBM12B	RBM12B		false	389677	147	0	1	ASSOCIATED_NEW_GENE	0	0.991763	false	0	389677	0	0	[B9ZVT1, E5RHG1, E5RJ83, E5RJV8, Q8IXT5]	389677
			3.20811	0			5.Nucleus	5.Nucleus	0.31171	1	6	ENSG00000259956	GENE-protein_coding	29890	RBM15B	RBM15B		false	29890	315	0	1	ASSOCIATED_NEW_GENE	0	0.99299	false	0	29890	0	0	[L8EAN0, Q0VA89, Q8NDT2]	29890
			3.20811	0			0.Annotation definition not found in 'Homo Sapiens.properties' file	0.Annotation definition not found in 'Homo Sapiens.properties' file	0.31171	1	6	ENSG00000184863	GENE-nonsense_mediated_decay,processed_transcript,protein_coding	155435	RBM33	RBM33		false	155435	315	0	1	ASSOCIATED_NEW_GENE	0	0.99299	false	0	155435	0	0	[A0A0C4DFS3, A8MTF7, C9J7M3, H0Y3K3, H0Y3K4, H7BXM6, H7C0H2, Q96EV2]	155435
			3.76757	0			0.Annotation definition not found in 'Homo Sapiens.properties' file	0.Annotation definition not found in 'Homo Sapiens.properties' file	0.265423	1	6	ENSG00000213516	GENE-protein_coding	494115	RBMXL1	RBMXL1		false	494115	108	0	1	ASSOCIATED_NEW_GENE	0	0.991214	false	0	494115	0	0	[A0A1B0GUK8, Q96E39]	494115
			3.59459	0			3.Intra Cellular	3.Intra Cellular	0.278195	1	4	ENSG00000136144	GENE-processed_transcript,protein_coding	55213	RCBTB1	RCBTB1		false	55213	147	0	1	ASSOCIATED_NEW_GENE	0	0.991763	false	0	55213	0	0	[B3KR20, Q8NDN9]	55213
			3.20811	0			3.Intra Cellular	3.Intra Cellular	0.31171	1	6	ENSG00000165476	GENE-nonsense_mediated_decay,protein_coding	221035	REEP3	REEP3		false	221035	315	0	1	ASSOCIATED_NEW_GENE	0	0.99299	false	0	221035	0	0	[A0A0U1RR85, Q6NUK4, Q8WV73, X5D7U8, X5DP57, X5DR89]	221035
			3.76757	0			2.Plasma Membrane	2.Plasma Membrane, 3.Intra Cellular	0.265423	1	6	ENSG00000092871	GENE-nonsense_mediated_decay,processed_transcript,protein_coding	117584	RFFL	RFFL		false	117584	108	0	1	ASSOCIATED_NEW_GENE	0	0.991214	false	0	117584	0	0	[C9JE27, J3KSI3, J3KSU7, J3QR17, Q8WZ73]	117584
			3.76757	0			3.Intra Cellular	3.Intra Cellular	0.265423	1	6	ENSG00000163933	GENE-protein_coding,retained_intron	91869	RFT1	RFT1		false	91869	108	0	1	ASSOCIATED_NEW_GENE	0	0.991214	false	0	91869	0	0	[A0A291FGD9, B5MDE0, C9JP01, Q96AA3]	91869
			3.76757	0			1.Extracellular	1.Extracellular, 2.Plasma Membrane, 3.Intra Cellular	0.265423	1	6	ENSG00000067560	GENE-nonsense_mediated_decay,processed_transcript,protein_coding	387	RHOA	RHOA		false	387	108	0	1	ASSOCIATED_NEW_GENE	0	0.991214	false	0	387	0	0	[A0A024R324, A0A0B6XK12, A0A7I2V3G1, A0A7I2V5E6, A0A7I2YQV1, B4DKN9, C9JNR4, C9JRM1, C9JX21, P61586, Q9BVT0]	387
			3.76757	0			1.Extracellular	1.Extracellular, 2.Plasma Membrane, 3.Intra Cellular	0.265423	1	6	ENSG00000119729	GENE-nonsense_mediated_decay,processed_transcript,protein_coding,retained_intron	23433	RHOQ	RHOQ		false	23433	108	0	1	ASSOCIATED_NEW_GENE	0	0.991214	false	0	23433	0	0	[D6W5A7, E5RFZ3, F8WET9, H0YB40, H0YB93, P17081, V9HWD0]	23433
			3.20811	0			3.Intra Cellular	3.Intra Cellular	0.31171	1	6	ENSG00000164327	GENE-nonsense_mediated_decay,processed_transcript,protein_coding,retained_intron	253260	RICTOR	RICTOR		false	253260	315	0	1	ASSOCIATED_NEW_GENE	0	0.99299	false	0	253260	0	0	[D6R9S6, Q6R327, Q8N6M7]	253260
			3.59459	0	Transcription Factor Complex		3.Intra Cellular	3.Intra Cellular	0.278195	1	4	ENSG00000131263	GENE-protein_coding	51132	RLIM	RLIM		false	51132	147	0	1	ASSOCIATED_NEW_GENE	0	0.991763	false	0	51132	0	0	[L0R533, Q9NVW2]	51132
			3.76757	0			1.Extracellular	1.Extracellular, 2.Plasma Membrane, 3.Intra Cellular	0.265423	1	6	ENSG00000249884	GENE-protein_coding	100526767	RNF103-CHMP3	RNF103-CHMP3		false	100526767	108	0	1	ASSOCIATED_NEW_GENE	0	0.991214	false	0	100526767	0	0	[A0A140T963, Q9Y3E7]	100526767
			3.20811	0			3.Intra Cellular	3.Intra Cellular	0.31171	1	6	ENSG00000108523	GENE-nonsense_mediated_decay,processed_transcript,protein_coding,retained_intron	26001	RNF167	RNF167		false	26001	315	0	1	ASSOCIATED_NEW_GENE	0	0.99299	false	0	26001	0	0	[I3L0L6, I3L0V7, I3L1K4, I3L2D4, I3L2Y3, I3L462, K7EN24, Q9H6Y7]	26001
			3.20811	0			3.Intra Cellular	3.Intra Cellular, 5.Nucleus	0.31171	1	6	ENSG00000166439	GENE-protein_coding	254225	RNF169	RNF169		false	254225	315	0	1	ASSOCIATED_NEW_GENE	0	0.99299	false	0	254225	0	0	[H0YEQ1, Q8NCN4]	254225
			4.24865	0			3.Intra Cellular	3.Intra Cellular, 5.Nucleus	0.235369	1	6	ENSG00000173821	GENE-processed_transcript,protein_coding,retained_intron	57674	RNF213	RNF213		false	57674	48	0	1	ASSOCIATED_NEW_GENE	0	0.989687	false	0	57674	0	0	[A0A0A0MTC1, A0A0A0MTR7, I3L3H9, Q63HN8]	57674
			3.59459	0			3.Intra Cellular	3.Intra Cellular, 4.Nuclear Membrane	0.278195	1	4	ENSG00000127870	GENE-processed_transcript,protein_coding	6049	RNF6	RNF6		false	6049	147	0	1	ASSOCIATED_NEW_GENE	0	0.991763	false	0	6049	0	0	[A0A024RDP2, A0A0S2Z4G9, Q9Y252]	6049
			3.20811	0			3.Intra Cellular	3.Intra Cellular	0.31171	1	6	ENSG00000153574	GENE-protein_coding	22934	RPIA	RPIA		false	22934	315	0	1	ASSOCIATED_NEW_GENE	0	0.99299	false	0	22934	0	0	[L0R8E0, P49247, Q53R32, Q53SB2]	22934
			4.24865	0			3.Intra Cellular	3.Intra Cellular, 5.Nucleus	0.235369	1	6	ENSG00000124614	GENE-protein_coding,retained_intron	6204	RPS10	RPS10		false	6204	48	0	1	ASSOCIATED_NEW_GENE	0	0.989687	false	0	6204	0	0	[A0A2R8Y7H1, A0A2R8YFH6, F6U211, P46783]	6204
			3.81622	0			3.Intra Cellular	3.Intra Cellular	0.26204	1	6	ENSG00000171858	GENE-processed_transcript,protein_coding	6227	RPS21	RPS21		false	6227	132	0	1	ASSOCIATED_NEW_GENE	0	0.99106	false	0	6227	0	0	[P63220, Q6FGH5, Q8WVC2, Q9BYK1, Q9BYK2]	6227
			3.81622	0			1.Extracellular	1.Extracellular, 3.Intra Cellular	0.26204	1	6	ENSG00000233927	GENE-protein_coding,retained_intron	6234	RPS28	RPS28		false	6234	132	0	1	ASSOCIATED_NEW_GENE	0	0.99106	false	0	6234	0	0	[B2R4R9, P62857]	6234
			3.20811	0			3.Intra Cellular	3.Intra Cellular	0.31171	1	6	ENSG00000155876	GENE-protein_coding	10670	RRAGA	RRAGA		false	10670	315	0	1	ASSOCIATED_NEW_GENE	0	0.99299	false	0	10670	0	0	[Q7L523]	10670
			3.20811	0			3.Intra Cellular	3.Intra Cellular, 5.Nucleus	0.31171	1	6	ENSG00000160208	GENE-protein_coding,retained_intron	23076	RRP1B	RRP1B		false	23076	315	0	1	ASSOCIATED_NEW_GENE	0	0.99299	false	0	23076	0	0	[Q14684, Q6PJM8]	23076
			3.20811	0			5.Nucleus	5.Nucleus	0.31171	1	6	ENSG00000203950	GENE-processed_transcript,protein_coding	26071	RTL8A	RTL8A		false	26071	315	0	1	ASSOCIATED_NEW_GENE	0	0.99299	false	0	26071	0	0	[Q9BWD3]	26071
			3.81622	0			3.Intra Cellular	3.Intra Cellular	0.26204	1	6	ENSG00000204130	GENE-nonsense_mediated_decay,processed_transcript,protein_coding,retained_intron	55680	RUFY2	RUFY2		false	55680	132	0	1	ASSOCIATED_NEW_GENE	0	0.99106	false	0	55680	0	0	[H0YD93, L8EAY6, Q5GIA6, Q8WXA3, S4R3P2]	55680
			3.81622	0			3.Intra Cellular	3.Intra Cellular	0.26204	1	6	ENSG00000160753	GENE-nonsense_mediated_decay,protein_coding,retained_intron	23623	RUSC1	RUSC1		false	23623	132	0	1	ASSOCIATED_NEW_GENE	0	0.99106	false	0	23623	0	0	[A0A087WVK5, A0A087WW20, A0A087WX95, A0A087WYB2, A0A087WYU8, A0A087WZ68, B4DQB8, Q68CX2, Q9BVN2]	23623
			3.20811	0			0.Annotation definition not found in 'Homo Sapiens.properties' file	0.Annotation definition not found in 'Homo Sapiens.properties' file	0.31171	1	6	ENSG00000013392	GENE-protein_coding	112611	RWDD2A	RWDD2A		false	112611	315	0	1	ASSOCIATED_NEW_GENE	0	0.99299	false	0	112611	0	0	[B2R7R2, B4DZK9, Q9UIY3]	112611
			3.59459	0			3.Intra Cellular	3.Intra Cellular	0.278195	1	4	ENSG00000187033	GENE-nonsense_mediated_decay,protein_coding	344658	SAMD7	SAMD7		false	344658	147	0	1	ASSOCIATED_NEW_GENE	0	0.991763	false	0	344658	0	0	[F8WDF1, Q7Z3H4]	344658
			3.20811	0	Transcription Factor Complex		0.Annotation definition not found in 'Homo Sapiens.properties' file	0.Annotation definition not found in 'Homo Sapiens.properties' file	0.31171	1	6	ENSG00000119042	GENE-nonsense_mediated_decay,processed_transcript,protein_coding,retained_intron	23314	SATB2	SATB2		false	23314	315	0	1	ASSOCIATED_NEW_GENE	0	0.99299	false	0	23314	0	0	[A0A024R3U6, B3KPQ9, C9JR56, F8WCV6, Q59FT3, Q9UPW6]	23314
			3.59459	0			1.Extracellular	1.Extracellular, 2.Plasma Membrane, 3.Intra Cellular	0.278195	1	4	ENSG00000138760	GENE-nonsense_mediated_decay,processed_transcript,protein_coding,retained_intron	950	SCARB2	SCARB2		false	950	147	0	1	ASSOCIATED_NEW_GENE	0	0.991763	false	0	950	0	0	[A0A024RDG6, A0A1W2PNX7, A0A1W2PPU6, A0A1W2PPX5, A0A1W2PPX6, A0A1W2PQB7, A0A1W2PQL5, A0A1W2PQR6, A0A1W2PRF6, A0A1W2PRS1, A0A1W2PS43, A0A1W2PS70, A0A1W2PSE4, D6RDG0, L0R538, Q14108]	950
			3.81622	0			3.Intra Cellular	3.Intra Cellular, 5.Nucleus	0.26204	1	6	ENSG00000167985	GENE-nonsense_mediated_decay,protein_coding	54949	SDHAF2	SDHAF2		false	54949	132	0	1	ASSOCIATED_NEW_GENE	0	0.99106	false	0	54949	0	0	[F5GYJ5, F5H4T4, F5H8E2, F8W679, M0QY91, M0QYN2, M0R060, Q9NX18]	54949
			3.59459	0			3.Intra Cellular	3.Intra Cellular	0.278195	1	4	ENSG00000133488	GENE-nonsense_mediated_decay,protein_coding	284904	SEC14L4	SEC14L4		false	284904	147	0	1	ASSOCIATED_NEW_GENE	0	0.991763	false	0	284904	0	0	[B2RMR2, B3KRP9, B3KSF0, D7F472, F8WEM2, Q6ICM2, Q9UDX3]	284904
			3.59459	0			3.Intra Cellular	3.Intra Cellular	0.278195	1	4	ENSG00000103184	GENE-protein_coding	9717	SEC14L5	SEC14L5		false	9717	147	0	1	ASSOCIATED_NEW_GENE	0	0.991763	false	0	9717	0	0	[K7ERV2, O43304]	9717
			3.76757	0			3.Intra Cellular	3.Intra Cellular	0.265423	1	6	ENSG00000106803	GENE-processed_transcript,protein_coding	10952	SEC61B	SEC61B		false	10952	108	0	1	ASSOCIATED_NEW_GENE	0	0.991214	false	0	10952	0	0	[P60468, S4R3B5]	10952
			3.59459	0			3.Intra Cellular	3.Intra Cellular	0.278195	1	4	ENSG00000162430	GENE-nonsense_mediated_decay,protein_coding	57190	SELENON	SELENON		false	57190	147	0	1	ASSOCIATED_NEW_GENE	0	0.991763	false	0	57190	0	0	[A0A804HLD6, H9KV50, Q9NZV5]	57190
			3.20811	0			3.Intra Cellular	3.Intra Cellular	0.31171	1	6	ENSG00000180096	GENE-nonsense_mediated_decay,processed_transcript,protein_coding,retained_intron	1731	SEPTIN1	SEPTIN1		false	1731	315	0	1	ASSOCIATED_NEW_GENE	0	0.99299	false	0	1731	0	0	[I3L2M1, J3KNL2, Q8WYJ6]	1731
			3.59459	0			2.Plasma Membrane	2.Plasma Membrane, 3.Intra Cellular	0.278195	1	4	ENSG00000111897	GENE-protein_coding	57515	SERINC1	SERINC1		false	57515	147	0	1	ASSOCIATED_NEW_GENE	0	0.991763	false	0	57515	0	0	[Q9NRX5]	57515
			3.20811	0			1.Extracellular	1.Extracellular, 3.Intra Cellular	0.31171	1	6	ENSG00000021355	GENE-processed_transcript,protein_coding	1992	SERPINB1	SERPINB1		false	1992	315	0	1	ASSOCIATED_NEW_GENE	0	0.99299	false	0	1992	0	0	[P30740, V9HWH1]	1992
			3.76757	0			1.Extracellular	1.Extracellular, 3.Intra Cellular	0.265423	1	6	ENSG00000149257	GENE-nonsense_mediated_decay,protein_coding	871	SERPINH1	SERPINH1		false	871	108	0	1	ASSOCIATED_NEW_GENE	0	0.991214	false	0	871	0	0	[A0A024R5K8, A8K259, E9PIG2, E9PJH8, E9PK86, E9PKH2, E9PLA6, E9PMI5, E9PNX1, E9PPV6, E9PQ34, E9PR70, E9PRS3, H0YEP8, P50454]	871
			3.76757	0			3.Intra Cellular	3.Intra Cellular	0.265423	1	6	ENSG00000149212	GENE-processed_transcript,protein_coding	143686	SESN3	SESN3		false	143686	108	0	1	ASSOCIATED_NEW_GENE	0	0.991214	false	0	143686	0	0	[A0A0U1RR17, F5H1K7, P58005]	143686
			3.20811	0			5.Nucleus	5.Nucleus	0.31171	1	6	ENSG00000189091	GENE-nonsense_mediated_decay,processed_transcript,protein_coding,retained_intron	23450	SF3B3	SF3B3		false	23450	315	0	1	ASSOCIATED_NEW_GENE	0	0.99299	false	0	23450	0	0	[A8K6V3, H3BMB0, I3L4G7, J3QKV4, J3QL37, J3QRB2, Q15393]	23450
			3.20811	0			1.Extracellular	1.Extracellular, 3.Intra Cellular	0.31171	1	6	ENSG00000175793	GENE-protein_coding	2810	SFN	SFN		false	2810	315	0	1	ASSOCIATED_NEW_GENE	0	0.99299	false	0	2810	0	0	[P31947]	2810
			3.81622	0			0.Annotation definition not found in 'Homo Sapiens.properties' file	0.Annotation definition not found in 'Homo Sapiens.properties' file	0.26204	1	6	ENSG00000198818	GENE-processed_transcript,protein_coding	113402	SFT2D1	SFT2D1		false	113402	132	0	1	ASSOCIATED_NEW_GENE	0	0.99106	false	0	113402	0	0	[Q4G178, Q8WV19]	113402
			3.76757	0			1.Extracellular	1.Extracellular, 3.Intra Cellular	0.265423	1	6	ENSG00000168878	GENE-protein_coding,retained_intron	6439	SFTPB	SFTPB		false	6439	108	0	1	ASSOCIATED_NEW_GENE	0	0.991214	false	0	6439	0	0	[D6W5L6, H0Y7V6, P07988, U3KQT2]	6439
			3.76757	0			2.Plasma Membrane	2.Plasma Membrane, 3.Intra Cellular	0.265423	1	6	ENSG00000164023	GENE-processed_transcript,protein_coding	166929	SGMS2	SGMS2		false	166929	108	0	1	ASSOCIATED_NEW_GENE	0	0.991214	false	0	166929	0	0	[A0A024RDH4, E5RGG5, E5RJ63, E5RJU3, Q8NHU3]	166929
			3.81622	0			3.Intra Cellular	3.Intra Cellular	0.26204	1	6	ENSG00000107957	GENE-processed_transcript,protein_coding	9644	SH3PXD2A	SH3PXD2A		false	9644	132	0	1	ASSOCIATED_NEW_GENE	0	0.99106	false	0	9644	0	0	[B3KPL1, H0Y507, Q5TCZ1]	9644
			3.81622	0			3.Intra Cellular	3.Intra Cellular	0.26204	1	6	ENSG00000171241	GENE-processed_transcript,protein_coding,retained_intron	79801	SHCBP1	SHCBP1		false	79801	132	0	1	ASSOCIATED_NEW_GENE	0	0.99106	false	0	79801	0	0	[A0A024R6R1, I3L3Z1, Q8NEM2]	79801
			3.81622	0			2.Plasma Membrane	2.Plasma Membrane, 3.Intra Cellular	0.26204	1	6	ENSG00000164403	GENE-processed_transcript,protein_coding,retained_intron	134549	SHROOM1	SHROOM1		false	134549	132	0	1	ASSOCIATED_NEW_GENE	0	0.99106	false	0	134549	0	0	[A6NN40, C9JXU1, Q2M3G4]	134549
			3.81622	0			2.Plasma Membrane	2.Plasma Membrane, 3.Intra Cellular	0.26204	1	6	ENSG00000254415	GENE-protein_coding,retained_intron	100049587	SIGLEC14	SIGLEC14		false	100049587	132	0	1	ASSOCIATED_NEW_GENE	0	0.99106	false	0	100049587	0	0	[Q08ET2]	100049587
			3.20811	0			3.Intra Cellular	3.Intra Cellular, 5.Nucleus	0.31171	1	6	ENSG00000187531	GENE-nonsense_mediated_decay,protein_coding,retained_intron	51547	SIRT7	SIRT7		false	51547	315	0	1	ASSOCIATED_NEW_GENE	0	0.99299	false	0	51547	0	0	[I3L2A4, I3L480, Q9NRC8]	51547
			5.45946	0			2.Plasma Membrane	2.Plasma Membrane, 3.Intra Cellular	0.183168	1	6	ENSG00000005020	GENE-processed_transcript,protein_coding,retained_intron	8935	SKAP2	SKAP2		false	8935	25	0	1	ASSOCIATED_NEW_GENE	0	0.985843	false	0	8935	0	0	[B7Z5R3, C9JQ17, O75563]	8935
			3.59459	0			1.Extracellular	1.Extracellular, 2.Plasma Membrane, 3.Intra Cellular	0.278195	1	4	ENSG00000070915	GENE-processed_transcript,protein_coding,retained_intron	6559	SLC12A3	SLC12A3		false	6559	147	0	1	ASSOCIATED_NEW_GENE	0	0.991763	false	0	6559	0	0	[J3QSS1, L8E783, P55017]	6559
			3.81622	0			1.Extracellular	1.Extracellular, 2.Plasma Membrane	0.26204	1	6	ENSG00000155380	GENE-processed_transcript,protein_coding,retained_intron	6566	SLC16A1	SLC16A1		false	6566	132	0	1	ASSOCIATED_NEW_GENE	0	0.99106	false	0	6566	0	0	[A0A024R0H1, B4DKS0, P53985, Q5T8R3, Q5T8R4, Q5T8R5]	6566
			5.45946	0			2.Plasma Membrane	2.Plasma Membrane	0.183168	1	6	ENSG00000213901	GENE-nonsense_mediated_decay,processed_transcript,protein_coding,retained_intron	151295	SLC23A3	SLC23A3		false	151295	25	0	1	ASSOCIATED_NEW_GENE	0	0.985843	false	0	151295	0	0	[A0A0A0MSG3, B7Z508, C9JQ03, H7C2A2, Q6PIS1]	151295
			3.81622	0			1.Extracellular	1.Extracellular, 2.Plasma Membrane, 3.Intra Cellular	0.26204	1	6	ENSG00000075415	GENE-nonsense_mediated_decay,protein_coding,retained_intron	5250	SLC25A3	SLC25A3		false	5250	132	0	1	ASSOCIATED_NEW_GENE	0	0.99106	false	0	5250	0	0	[A0A024RBE8, A0A024RBH9, F8VVM2, F8VWQ0, F8VWR4, F8VY00, F8VYH5, Q00325, Q6MZF9]	5250
			3.20811	0			2.Plasma Membrane	2.Plasma Membrane	0.31171	1	6	ENSG00000173262	GENE-nonsense_mediated_decay,processed_transcript,protein_coding,retained_intron	144195	SLC2A14	SLC2A14		false	144195	315	0	1	ASSOCIATED_NEW_GENE	0	0.99299	false	0	144195	0	0	[F5GXP7, F5GXP8, F5GXT4, F5H076, F5H3J0, F5H565, F5H5Q3, F5H5V7, F5H6F6, F5H7N2, Q8TDB8]	144195
			3.59459	0			3.Intra Cellular	3.Intra Cellular	0.278195	1	4	ENSG00000157800	GENE-nonsense_mediated_decay,processed_transcript,protein_coding,retained_intron	84255	SLC37A3	SLC37A3		false	84255	147	0	1	ASSOCIATED_NEW_GENE	0	0.991763	false	0	84255	0	0	[C9J4S7, C9JZ37, F8WAR9, F8WC97, F8WF28, H7C4I4, H7C4J2, H7C4J3, H7C4J5, H7C4U0, H7C4U5, H7C4Z5, H7C594, H7C5E7, H7C5T4, Q8NCC5]	84255
			3.59459	0			1.Extracellular	1.Extracellular, 2.Plasma Membrane, 3.Intra Cellular	0.278195	1	4	ENSG00000111371	GENE-processed_transcript,protein_coding,retained_intron	81539	SLC38A1	SLC38A1		false	81539	147	0	1	ASSOCIATED_NEW_GENE	0	0.991763	false	0	81539	0	0	[A0A024R124, F8VX04, F8VX12, Q9H2H9]	81539
			5.45946	0			3.Intra Cellular	3.Intra Cellular	0.183168	1	6	ENSG00000177058	GENE-nonsense_mediated_decay,processed_transcript,protein_coding,retained_intron	153129	SLC38A9	SLC38A9		false	153129	25	0	1	ASSOCIATED_NEW_GENE	0	0.985843	false	0	153129	0	0	[A0A024QZR9, B3KVK8, D6R9Q7, D6R9X0, D6RBB9, D6RDH2, D6RE72, D6RER8, D6RG31, D6RHF5, D6RHW0, D6RIW7, E7ESU6, Q8NBW4]	153129
			3.20811	0			2.Plasma Membrane	2.Plasma Membrane	0.31171	1	6	ENSG00000063127	GENE-protein_coding,retained_intron	28968	SLC6A16	SLC6A16		false	28968	315	0	1	ASSOCIATED_NEW_GENE	0	0.99299	false	0	28968	0	0	[M0QYK3, M0QZL4, M0R1Y6, M0R2R5, Q9GZN6]	28968
			4.24865	0			5.Nucleus	5.Nucleus	0.235369	1	6	ENSG00000153147	GENE-protein_coding,retained_intron	8467	SMARCA5	SMARCA5		false	8467	48	0	1	ASSOCIATED_NEW_GENE	0	0.989687	false	0	8467	0	0	[O60264, Q4W5G3, Q4W5H1]	8467
			3.81622	0			0.Annotation definition not found in 'Homo Sapiens.properties' file	0.Annotation definition not found in 'Homo Sapiens.properties' file	0.26204	1	6	ENSG00000066117	GENE-nonsense_mediated_decay,processed_transcript,protein_coding,retained_intron	6602	SMARCD1	SMARCD1		false	6602	132	0	1	ASSOCIATED_NEW_GENE	0	0.99106	false	0	6602	0	0	[A0A024R102, A0A024R137, F8VRQ4, F8VUB0, F8VW95, F8VZ70, H0YHV1, L8EC99, Q96GM5]	6602
			3.76757	0			3.Intra Cellular	3.Intra Cellular	0.265423	1	6	ENSG00000163683	GENE-nonsense_mediated_decay,processed_transcript,protein_coding	201895	SMIM14	SMIM14		false	201895	108	0	1	ASSOCIATED_NEW_GENE	0	0.991214	false	0	201895	0	0	[A0A024R9U4, D6R9U3, D6RDB1, D6RGZ0, Q96QK8]	201895
			4.24865	0			1.Extracellular	1.Extracellular, 2.Plasma Membrane	0.235369	1	6	ENSG00000130768	GENE-nonsense_mediated_decay,processed_transcript,protein_coding	27293	SMPDL3B	SMPDL3B		false	27293	48	0	1	ASSOCIATED_NEW_GENE	0	0.989687	false	0	27293	0	0	[B4DEC6, B4DW34, F8VWW8, F8VXS3, Q5T0Y8, Q92485]	27293
			3.20811	0			3.Intra Cellular	3.Intra Cellular, 5.Nucleus	0.31171	1	6	ENSG00000124216	GENE-protein_coding	6615	SNAI1	SNAI1		false	6615	315	0	1	ASSOCIATED_NEW_GENE	0	0.99299	false	0	6615	0	0	[O95863]	6615
			3.59459	0			2.Plasma Membrane	2.Plasma Membrane, 3.Intra Cellular	0.278195	1	4	ENSG00000132639	GENE-processed_transcript,protein_coding,retained_intron	6616	SNAP25	SNAP25		false	6616	147	0	1	ASSOCIATED_NEW_GENE	0	0.991763	false	0	6616	0	0	[A0A0A0MSS0, P60880]	6616
			3.81622	0			0.Annotation definition not found in 'Homo Sapiens.properties' file	0.Annotation definition not found in 'Homo Sapiens.properties' file	0.26204	1	6	ENSG00000144028	GENE-protein_coding,retained_intron	23020	SNRNP200	SNRNP200		false	23020	132	0	1	ASSOCIATED_NEW_GENE	0	0.99106	false	0	23020	0	0	[A0A494C1A5, A2RRQ7, A4FU77, O75643, Q7L5W4]	23020
			3.20811	0			3.Intra Cellular	3.Intra Cellular	0.31171	1	6	ENSG00000147164	GENE-processed_transcript,protein_coding	29934	SNX12	SNX12		false	29934	315	0	1	ASSOCIATED_NEW_GENE	0	0.99299	false	0	29934	0	0	[A0A087X0R6, Q3SYF1, Q9UMY4]	29934
			3.59459	0			3.Intra Cellular	3.Intra Cellular	0.278195	1	4	ENSG00000071189	GENE-nonsense_mediated_decay,processed_transcript,protein_coding,retained_intron	23161	SNX13	SNX13		false	23161	147	0	1	ASSOCIATED_NEW_GENE	0	0.991763	false	0	23161	0	0	[A0A024R9Z9, A0A024RA48, A0A087WUZ7, B3KN60, F8W8A9, F8WB11, L8E8M6, Q86XC4, Q9NSH0, Q9Y5W8]	23161
			3.76757	0			3.Intra Cellular	3.Intra Cellular	0.265423	1	6	ENSG00000148158	GENE-processed_transcript,protein_coding	401548	SNX30	SNX30		false	401548	108	0	1	ASSOCIATED_NEW_GENE	0	0.991214	false	0	401548	0	0	[H0Y496, Q5VWJ9]	401548
			3.76757	0			2.Plasma Membrane	2.Plasma Membrane, 3.Intra Cellular	0.265423	1	6	ENSG00000173548	GENE-protein_coding	257364	SNX33	SNX33		false	257364	108	0	1	ASSOCIATED_NEW_GENE	0	0.991214	false	0	257364	0	0	[H3BPR3, L8E981, Q8WV41]	257364
			5.45946	0			3.Intra Cellular	3.Intra Cellular	0.183168	1	6	ENSG00000106266	GENE-protein_coding,retained_intron	29886	SNX8	SNX8		false	29886	25	0	1	ASSOCIATED_NEW_GENE	0	0.985843	false	0	29886	0	0	[A0A024R820, C9IYC5, C9J014, C9J271, C9J8E6, C9JCB9, Q9Y5X2]	29886
			3.59459	0			1.Extracellular	1.Extracellular, 2.Plasma Membrane, 3.Intra Cellular	0.278195	1	4	ENSG00000130340	GENE-nonsense_mediated_decay,protein_coding,retained_intron	51429	SNX9	SNX9		false	51429	147	0	1	ASSOCIATED_NEW_GENE	0	0.991763	false	0	51429	0	0	[A0A087WVE4, A0A087WZW2, A0A7P0T8C7, A0A7P0T8D4, A0A7P0T8L2, A0A7P0T8M2, A0A7P0T8S8, A0A7P0T8Z2, A0A7P0T8Z7, A0A7P0TBD0, A0A7P0TBI9, A0A7P0Z4A2, A0A7P0Z4A5, Q9Y5X1]	51429
			3.20811	0			2.Plasma Membrane	2.Plasma Membrane, 3.Intra Cellular	0.31171	1	6	ENSG00000180008	GENE-processed_transcript,protein_coding	122809	SOCS4	SOCS4		false	122809	315	0	1	ASSOCIATED_NEW_GENE	0	0.99299	false	0	122809	0	0	[Q5H9R6, Q8WXH5]	122809
			3.59459	0			2.Plasma Membrane	2.Plasma Membrane, 3.Intra Cellular	0.278195	1	4	ENSG00000274211	GENE-protein_coding,retained_intron	30837	SOCS7	SOCS7		false	30837	147	0	1	ASSOCIATED_NEW_GENE	0	0.991763	false	0	30837	0	0	[A0A087WZ14, A0A087X1Q5, A0A0J9YXY1, A0A5F9YLF9, O14512]	30837
			3.81622	0			1.Extracellular	1.Extracellular, 3.Intra Cellular	0.26204	1	6	ENSG00000112096	GENE-nonsense_mediated_decay,processed_transcript,protein_coding,retained_intron	6648	SOD2	SOD2		false	6648	132	0	1	ASSOCIATED_NEW_GENE	0	0.99106	false	0	6648	0	0	[A0A384NL29, F5GXZ9, F5GYZ5, F5H3C5, F5H4R2, G5E9P6, G8JLJ2, P04179, Q4ZJI1, Q6LE88, Q71UR9, Q7Z7M4, Q7Z7M5, Q7Z7M6, Q7Z7M7, Q96AM7, Q9UG59]	6648
			3.20811	0	Transcription Factor Complex		3.Intra Cellular	3.Intra Cellular	0.31171	1	6	ENSG00000181449	GENE-protein_coding	6657	SOX2	SOX2		false	6657	315	0	1	ASSOCIATED_NEW_GENE	0	0.99299	false	0	6657	0	0	[A0A0B5HFB3, A0A0B5HFE5, A0A0B5HLA0, A0A0B5HP19, A0A0B5HSU3, A0A0U3FYV6, P48431]	6657
			3.59459	0	Transcription Factor Complex		1.Extracellular	1.Extracellular, 2.Plasma Membrane, 3.Intra Cellular	0.278195	1	4	ENSG00000125398	GENE-protein_coding	6662	SOX9	SOX9		false	6662	147	0	1	ASSOCIATED_NEW_GENE	0	0.991763	false	0	6662	0	0	[A0A0U4U3E8, A0A0U4YWA5, P48436, S6CBB2, U5XJY7, U5XJZ1, U5XJZ4, U5XK44, U5XK50, U5XKW5, U5XKW9, U5XMM4, U5XN63, U5XN67]	6662
			5.45946	0			0.Annotation definition not found in 'Homo Sapiens.properties' file	0.Annotation definition not found in 'Homo Sapiens.properties' file	0.183168	1	6	ENSG00000167182	GENE-protein_coding	6668	SP2	SP2		false	6668	25	0	1	ASSOCIATED_NEW_GENE	0	0.985843	false	0	6668	0	0	[A0A1B0GTK3, A0A1B0GV29, A0A1B0GVH1, A0A286YFJ7, Q02086, Q9BRW5]	6668
			3.81622	0			1.Extracellular	1.Extracellular, 2.Plasma Membrane, 3.Intra Cellular, 5.Nucleus	0.26204	1	6	ENSG00000138600	GENE-processed_transcript,protein_coding,retained_intron	84888	SPPL2A	SPPL2A		false	84888	132	0	1	ASSOCIATED_NEW_GENE	0	0.99106	false	0	84888	0	0	[H0YNA2, H0YNA7, Q8TCT8]	84888
			3.81622	0			2.Plasma Membrane	2.Plasma Membrane, 3.Intra Cellular	0.26204	1	6	ENSG00000166068	GENE-processed_transcript,protein_coding	161742	SPRED1	SPRED1		false	161742	132	0	1	ASSOCIATED_NEW_GENE	0	0.99106	false	0	161742	0	0	[H0YMN8, L8EBE5, Q7Z699]	161742
			3.20811	0			1.Extracellular	1.Extracellular, 2.Plasma Membrane, 3.Intra Cellular	0.31171	1	6	ENSG00000197122	GENE-processed_transcript,protein_coding,retained_intron	6714	SRC	SRC		false	6714	315	0	1	ASSOCIATED_NEW_GENE	0	0.99299	false	0	6714	0	0	[P12931, Q71UK5]	6714
			3.20811	0			0.Annotation definition not found in 'Homo Sapiens.properties' file	0.Annotation definition not found in 'Homo Sapiens.properties' file	0.31171	1	6	ENSG00000167978	GENE-nonsense_mediated_decay,processed_transcript,protein_coding,retained_intron	23524	SRRM2	SRRM2		false	23524	315	0	1	ASSOCIATED_NEW_GENE	0	0.99299	false	0	23524	0	0	[A0A087X1W1, A0A140VK53, A0AUK8, I3L0N7, I3L182, I3L1C0, I3L1I8, I3L1W5, I3L3Q8, I3L4D8, I3L4U6, Q05BI2, Q05CV9, Q9UQ35]	23524
			3.20811	0			3.Intra Cellular	3.Intra Cellular	0.31171	1	6	ENSG00000145687	GENE-processed_transcript,protein_coding,retained_intron	23635	SSBP2	SSBP2		false	23635	315	0	1	ASSOCIATED_NEW_GENE	0	0.99299	false	0	23635	0	0	[A0A087X159, D6RAC5, H0Y9M5, H0Y9V4, P81877]	23635
			3.20811	0			3.Intra Cellular	3.Intra Cellular	0.31171	1	6	ENSG00000115145	GENE-processed_transcript,protein_coding,retained_intron	10254	STAM2	STAM2		false	10254	315	0	1	ASSOCIATED_NEW_GENE	0	0.99299	false	0	10254	0	0	[O75886]	10254
			5.45946	0			3.Intra Cellular	3.Intra Cellular	0.183168	1	6	ENSG00000172345	GENE-nonsense_mediated_decay,processed_transcript,protein_coding,retained_intron	80765	STARD5	STARD5		false	80765	25	0	1	ASSOCIATED_NEW_GENE	0	0.985843	false	0	80765	0	0	[H0YLW4, Q9NSY2]	80765
			3.81622	0			1.Extracellular	1.Extracellular, 3.Intra Cellular	0.26204	1	6	ENSG00000117632	GENE-processed_transcript,protein_coding	3925	STMN1	STMN1		false	3925	132	0	1	ASSOCIATED_NEW_GENE	0	0.99106	false	0	3925	0	0	[A0A140VJW2, A2A2D0, B5BU83, P16949, Q96CE4]	3925
			3.20811	0			3.Intra Cellular	3.Intra Cellular	0.31171	1	6	ENSG00000023734	GENE-nonsense_mediated_decay,protein_coding,retained_intron	11171	STRAP	STRAP		false	11171	315	0	1	ASSOCIATED_NEW_GENE	0	0.99299	false	0	11171	0	0	[B0AZV0, F5H1G1, H0YH33, Q9Y3F4]	11171
			3.20811	0			1.Extracellular	1.Extracellular, 2.Plasma Membrane, 3.Intra Cellular, 4.Nuclear Membrane	0.31171	1	6	ENSG00000106089	GENE-processed_transcript,protein_coding,retained_intron	6804	STX1A	STX1A		false	6804	315	0	1	ASSOCIATED_NEW_GENE	0	0.99299	false	0	6804	0	0	[A0A0C4DFZ1, A8MZ54, Q16623, Q75ME0, X5D7S1]	6804
			3.20811	0			3.Intra Cellular	3.Intra Cellular	0.31171	1	6	ENSG00000165416	GENE-processed_transcript,protein_coding,retained_intron	10910	SUGT1	SUGT1		false	10910	315	0	1	ASSOCIATED_NEW_GENE	0	0.99299	false	0	10910	0	0	[A8K7W3, B4DYC6, Q9Y2Z0]	10910
			3.76757	0			0.Annotation definition not found in 'Homo Sapiens.properties' file	0.Annotation definition not found in 'Homo Sapiens.properties' file	0.265423	1	6	ENSG00000092201	GENE-nonsense_mediated_decay,protein_coding,retained_intron	11198	SUPT16H	SUPT16H		false	11198	108	0	1	ASSOCIATED_NEW_GENE	0	0.991214	false	0	11198	0	0	[G3V2X0, G3V401, G3V5A4, Q0VGA3, Q9Y5B9]	11198
			3.76757	0			1.Extracellular	1.Extracellular, 2.Plasma Membrane, 3.Intra Cellular	0.265423	1	6	ENSG00000169895	GENE-processed_transcript,protein_coding	94056	SYAP1	SYAP1		false	94056	108	0	1	ASSOCIATED_NEW_GENE	0	0.991214	false	0	94056	0	0	[Q96A49]	94056
			3.59459	0			2.Plasma Membrane	2.Plasma Membrane, 3.Intra Cellular	0.278195	1	4	ENSG00000097096	GENE-protein_coding,retained_intron	84144	SYDE2	SYDE2		false	84144	147	0	1	ASSOCIATED_NEW_GENE	0	0.991763	false	0	84144	0	0	[A0A2X0SFY5, Q5VT97]	84144
			3.81622	0			3.Intra Cellular	3.Intra Cellular	0.26204	1	6	ENSG00000135316	GENE-nonsense_mediated_decay,protein_coding,retained_intron	10492	SYNCRIP	SYNCRIP		false	10492	132	0	1	ASSOCIATED_NEW_GENE	0	0.99106	false	0	10492	0	0	[A0A7I2V2F0, A0A7I2V2F2, A0A7I2V309, A0A7I2V346, A0A7I2V4J0, A0A7I2V4Z0, A0A7I2V5Q6, A0A7I2YQN2, A0A7I2YQV8, B7Z645, F6UXX1, O60506, Q05CK9, Q59GL1]	10492
			3.20811	0			1.Extracellular	1.Extracellular, 2.Plasma Membrane, 3.Intra Cellular, 4.Nuclear Membrane	0.31171	1	6	ENSG00000054654	GENE-nonsense_mediated_decay,processed_transcript,protein_coding,retained_intron	23224	SYNE2	SYNE2		false	23224	315	0	1	ASSOCIATED_NEW_GENE	0	0.99299	false	0	23224	0	0	[A0A0A0MRE3, A0A0C4DGK3, A0A1W2PRN9, A0A1W2PS37, A0A669KB22, A0A669KB61, A0A669KBG2, A0A669KBH2, G3V2Q0, G3V3D4, G3V4T3, G3V5N1, G3V5X4, Q6MZP0, Q8WXH0]	23224
			3.20811	0			2.Plasma Membrane	2.Plasma Membrane, 3.Intra Cellular	0.31171	1	6	ENSG00000067715	GENE-processed_transcript,protein_coding	6857	SYT1	SYT1		false	6857	315	0	1	ASSOCIATED_NEW_GENE	0	0.99299	false	0	6857	0	0	[A0A024RBE9, C9JX50, F8VXH0, F8VYH8, F8VZY3, F8W1U9, J3KQA0, P21579]	6857
			3.81622	0			3.Intra Cellular	3.Intra Cellular	0.26204	1	6	ENSG00000013810	GENE-nonsense_mediated_decay,processed_transcript,protein_coding,retained_intron	10460	TACC3	TACC3		false	10460	132	0	1	ASSOCIATED_NEW_GENE	0	0.99106	false	0	10460	0	0	[A0A087WUE2, A0A494BZT8, A0A494C117, C9JA91, E7EMT0, F8WC55, H0Y8F2, Q9Y6A5]	10460
			3.76757	0			1.Extracellular	1.Extracellular, 3.Intra Cellular	0.265423	1	6	ENSG00000158710	GENE-processed_transcript,protein_coding	8407	TAGLN2	TAGLN2		false	8407	108	0	1	ASSOCIATED_NEW_GENE	0	0.991214	false	0	8407	0	0	[A0A384MTL2, P37802, Q5ZEZ7, X6RJP6]	8407
			4.24865	0			0.Annotation definition not found in 'Homo Sapiens.properties' file	0.Annotation definition not found in 'Homo Sapiens.properties' file	0.235369	1	6	ENSG00000170921	GENE-protein_coding,retained_intron	26115	TANC2	TANC2		false	26115	48	0	1	ASSOCIATED_NEW_GENE	0	0.989687	false	0	26115	0	0	[J3KRP9, J3KTM5, J3QQY7, J3QRF0, Q9HCD6]	26115
			3.81622	0			1.Extracellular	1.Extracellular, 3.Intra Cellular	0.26204	1	6	ENSG00000160551	GENE-protein_coding,retained_intron	57551	TAOK1	TAOK1		false	57551	132	0	1	ASSOCIATED_NEW_GENE	0	0.99106	false	0	57551	0	0	[A0A024QZ70, J3QS76, Q7L7X3]	57551
			3.20811	0			0.Annotation definition not found in 'Homo Sapiens.properties' file	0.Annotation definition not found in 'Homo Sapiens.properties' file	0.31171	1	6	ENSG00000163946	GENE-processed_transcript,protein_coding,retained_intron	23272	TASOR	TASOR		false	23272	315	0	1	ASSOCIATED_NEW_GENE	0	0.99299	false	0	23272	0	0	[A0A087X0F1, Q9UK61]	23272
			3.20811	0			5.Nucleus	5.Nucleus	0.31171	1	6	ENSG00000183751	GENE-nonsense_mediated_decay,protein_coding,retained_intron	10607	TBL3	TBL3		false	10607	315	0	1	ASSOCIATED_NEW_GENE	0	0.99299	false	0	10607	0	0	[A0A087WYP7, A0JLS5, H3BN88, J3KNP2, Q12788]	10607
			3.20811	0			2.Plasma Membrane	2.Plasma Membrane, 3.Intra Cellular	0.31171	1	6	ENSG00000135269	GENE-nonsense_mediated_decay,processed_transcript,protein_coding,retained_intron	26136	TES	TES		false	26136	315	0	1	ASSOCIATED_NEW_GENE	0	0.99299	false	0	26136	0	0	[A4D0U5, E0X098, F8W7T0, F8WDI4, H7BYK1, Q9UGI8]	26136
			3.76757	0			1.Extracellular	1.Extracellular, 3.Intra Cellular	0.265423	1	6	ENSG00000186340	GENE-nonsense_mediated_decay,processed_transcript,protein_coding	7058	THBS2	THBS2		false	7058	108	0	1	ASSOCIATED_NEW_GENE	0	0.991214	false	0	7058	0	0	[A0A3B3ITK0, A0A7I2V344, A0A7I2V585, A0A7I2YQ86, A0A7I2YQT6, P35442, Q5RI53]	7058
			3.81622	0			3.Intra Cellular	3.Intra Cellular	0.26204	1	6	ENSG00000172009	GENE-processed_transcript,protein_coding,retained_intron	7064	THOP1	THOP1		false	7064	132	0	1	ASSOCIATED_NEW_GENE	0	0.99106	false	0	7064	0	0	[K7EIK4, K7EKB6, K7EL02, K7EL32, K7EMU4, K7EP46, P52888, Q96CV8, Q9BW75]	7064
			3.81622	0	Transcription Factor Complex		0.Annotation definition not found in 'Homo Sapiens.properties' file	0.Annotation definition not found in 'Homo Sapiens.properties' file	0.26204	1	6	ENSG00000151090	GENE-nonsense_mediated_decay,processed_transcript,protein_coding	7068	THRB	THRB		false	7068	132	0	1	ASSOCIATED_NEW_GENE	0	0.99106	false	0	7068	0	0	[A0A024R2I8, A0A0C4DG57, A0A0R5RI69, A0A0R5RI71, A0A0R5RI75, A0A0R5RI99, A0A0R5RIB5, A0A2R8YF24, C9JHC2, C9JJM3, C9JNQ4, C9JTN1, C9JZS5, E0XAW8, J3KR21, P10828, W6JGS6]	7068
			4.24865	0			2.Plasma Membrane	2.Plasma Membrane, 3.Intra Cellular	0.235369	1	6	ENSG00000135956	GENE-protein_coding	55654	TMEM127	TMEM127		false	55654	48	0	1	ASSOCIATED_NEW_GENE	0	0.989687	false	0	55654	0	0	[C9J4H2, O75204, Q9H6I0]	55654
			3.20811	0			3.Intra Cellular	3.Intra Cellular	0.31171	1	6	ENSG00000174695	GENE-processed_transcript,protein_coding,retained_intron	153339	TMEM167A	TMEM167A		false	153339	315	0	1	ASSOCIATED_NEW_GENE	0	0.99299	false	0	153339	0	0	[Q8TBQ9]	153339
			3.59459	0			3.Intra Cellular	3.Intra Cellular	0.278195	1	4	ENSG00000166822	GENE-nonsense_mediated_decay,protein_coding	124491	TMEM170A	TMEM170A		false	124491	147	0	1	ASSOCIATED_NEW_GENE	0	0.991763	false	0	124491	0	0	[B3KT46, H3BQT8, H3BRD7, H3BS26, Q8WVE7]	124491
			5.45946	0			2.Plasma Membrane	2.Plasma Membrane	0.183168	1	6	ENSG00000205084	GENE-nonsense_mediated_decay,processed_transcript,protein_coding,retained_intron	79583	TMEM231	TMEM231		false	79583	25	0	1	ASSOCIATED_NEW_GENE	0	0.985843	false	0	79583	0	0	[A0A087WW60, H3BMW7, H3BPY4, H3BTN6, Q9H6L2]	79583
			3.76757	0			1.Extracellular	1.Extracellular, 2.Plasma Membrane, 3.Intra Cellular	0.265423	1	6	ENSG00000116209	GENE-processed_transcript,protein_coding	9528	TMEM59	TMEM59		false	9528	108	0	1	ASSOCIATED_NEW_GENE	0	0.991214	false	0	9528	0	0	[D3DQ48, Q5T6Z8, Q5T703, Q5T704, Q5T706, Q6P5R1, Q9BXS4]	9528
			3.20811	0			3.Intra Cellular	3.Intra Cellular	0.31171	1	6	ENSG00000128872	GENE-nonsense_mediated_decay,protein_coding,retained_intron	29767	TMOD2	TMOD2		false	29767	315	0	1	ASSOCIATED_NEW_GENE	0	0.99299	false	0	29767	0	0	[G5EA42, H0YMA2, Q4G0W6, Q9NZR1]	29767
			3.20811	0			3.Intra Cellular	3.Intra Cellular	0.31171	1	6	ENSG00000138594	GENE-nonsense_mediated_decay,processed_transcript,protein_coding	29766	TMOD3	TMOD3		false	29766	315	0	1	ASSOCIATED_NEW_GENE	0	0.99299	false	0	29766	0	0	[H0YKU1, H0YNJ8, H0YNU8, Q9NYL9]	29766
			3.59459	0			3.Intra Cellular	3.Intra Cellular	0.278195	1	4	ENSG00000139324	GENE-nonsense_mediated_decay,protein_coding	160418	TMTC3	TMTC3		false	160418	147	0	1	ASSOCIATED_NEW_GENE	0	0.991763	false	0	160418	0	0	[A8K321, F8VR71, F8VRY4, F8W044, L8ECP4, Q6ZXV5]	160418
			3.81622	0			2.Plasma Membrane	2.Plasma Membrane	0.26204	1	6	ENSG00000120889	GENE-nonsense_mediated_decay,processed_transcript,protein_coding,retained_intron	8795	TNFRSF10B	TNFRSF10B		false	8795	132	0	1	ASSOCIATED_NEW_GENE	0	0.99106	false	0	8795	0	0	[B5BU36, D3DSR9, E9PBT3, O14763, Q6FH58, Q7Z2I8]	8795
			3.20811	0			1.Extracellular	1.Extracellular, 2.Plasma Membrane, 3.Intra Cellular	0.31171	1	6	ENSG00000083312	GENE-nonsense_mediated_decay,processed_transcript,protein_coding,retained_intron	3842	TNPO1	TNPO1		false	3842	315	0	1	ASSOCIATED_NEW_GENE	0	0.99299	false	0	3842	0	0	[A0A024RAM0, A0A7P0T944, A0A7P0T9C0, A0A7P0TBF0, A0A7P0Z4D3, E7EW37, Q92973, S4R398]	3842
			3.20811	0			3.Intra Cellular	3.Intra Cellular	0.31171	1	6	ENSG00000064419	GENE-protein_coding	23534	TNPO3	TNPO3		false	23534	315	0	1	ASSOCIATED_NEW_GENE	0	0.99299	false	0	23534	0	0	[A0A024R794, B3KMX1, C9J7E5, E9PFH4, Q9Y5L0]	23534
			3.20811	0			3.Intra Cellular	3.Intra Cellular, 4.Nuclear Membrane	0.31171	1	6	ENSG00000223566	GENE-unprocessed_pseudogene	27320	TNRC18P2	TNRC18P2		false	27320	315	0	1	ASSOCIATED_NEW_GENE	0	0.99299	false	0	27320	0	0		27320
			3.20811	0			1.Extracellular	1.Extracellular, 2.Plasma Membrane, 3.Intra Cellular	0.31171	1	6	ENSG00000100284	GENE-nonsense_mediated_decay,protein_coding,retained_intron	10043	TOM1	TOM1		false	10043	315	0	1	ASSOCIATED_NEW_GENE	0	0.99299	false	0	10043	0	0	[B0QY01, B0QY02, B3KUF5, B3KUU1, F8WAW7, F8WB30, F8WBB0, F8WE29, H7BYN7, O60784, V9GYF4, V9GZ68]	10043
			3.20811	0			3.Intra Cellular	3.Intra Cellular	0.31171	1	6	ENSG00000130204	GENE-nonsense_mediated_decay,protein_coding	10452	TOMM40	TOMM40		false	10452	315	0	1	ASSOCIATED_NEW_GENE	0	0.99299	false	0	10452	0	0	[K7EJ57, K7EKG4, K7EKG6, O96008]	10452
			3.20811	0			3.Intra Cellular	3.Intra Cellular	0.31171	1	6	ENSG00000162341	GENE-nonsense_mediated_decay,processed_transcript,protein_coding,retained_intron	219931	TPCN2	TPCN2		false	219931	315	0	1	ASSOCIATED_NEW_GENE	0	0.99299	false	0	219931	0	0	[A0A1B0GTM1, A0A1B0GUM5, E7ETX0, Q59G56, Q8NHX9]	219931
			5.45946	0			1.Extracellular	1.Extracellular, 3.Intra Cellular	0.183168	1	6	ENSG00000167460	GENE-nonsense_mediated_decay,processed_transcript,protein_coding,retained_intron	7171	TPM4	TPM4		false	7171	25	0	1	ASSOCIATED_NEW_GENE	0	0.985843	false	0	7171	0	0	[A0A2R8Y5V9, A0A2R8YE05, A0A2R8YEU4, A0A2R8YGX3, A0A2R8YH90, A0A2R8YHD2, A0A590UJB9, A0A590UK79, A0A590UKD0, A0A5F9UKJ4, A0A5F9UN72, K7ELP0, K7ENT6, K7EPB9, K7ERG3, P67936, V9HW56]	7171
			3.20811	0			3.Intra Cellular	3.Intra Cellular	0.31171	1	6	ENSG00000171368	GENE-protein_coding	11076	TPPP	TPPP		false	11076	315	0	1	ASSOCIATED_NEW_GENE	0	0.99299	false	0	11076	0	0	[O94811, Q4L233]	11076
			3.20811	0			3.Intra Cellular	3.Intra Cellular, 5.Nucleus	0.31171	1	6	ENSG00000183763	GENE-nonsense_mediated_decay,processed_transcript,protein_coding,retained_intron	10293	TRAIP	TRAIP		false	10293	315	0	1	ASSOCIATED_NEW_GENE	0	0.99299	false	0	10293	0	0	[E7EN91, E7ETV1, E7EVC4, E7EW89, Q9BWF2]	10293
			3.76757	0			3.Intra Cellular	3.Intra Cellular	0.265423	1	6	ENSG00000206557	GENE-protein_coding	131405	TRIM71	TRIM71		false	131405	108	0	1	ASSOCIATED_NEW_GENE	0	0.991214	false	0	131405	0	0	[Q2Q1W2]	131405
			4.24865	0			0.Annotation definition not found in 'Homo Sapiens.properties' file	0.Annotation definition not found in 'Homo Sapiens.properties' file	0.235369	1	6	ENSG00000104447	GENE-protein_coding	7227	TRPS1	TRPS1		false	7227	48	0	1	ASSOCIATED_NEW_GENE	0	0.989687	false	0	7227	0	0	[A0A1D5RMP4, C9J6L7, E5RFF3, E5RJ97, E7EVN4, F8W8T0, H0YAV4, H0YC29, Q9UHF7]	7227
			3.59459	0			0.Annotation definition not found in 'Homo Sapiens.properties' file	0.Annotation definition not found in 'Homo Sapiens.properties' file	0.278195	1	4	ENSG00000113638	GENE-processed_transcript,protein_coding	23548	TTC33	TTC33		false	23548	147	0	1	ASSOCIATED_NEW_GENE	0	0.991763	false	0	23548	0	0	[A0A1B0GU95, A0A1B0GUJ4, A0A1B0GV67, Q6PID6]	23548
			3.81622	0			0.Annotation definition not found in 'Homo Sapiens.properties' file	0.Annotation definition not found in 'Homo Sapiens.properties' file	0.26204	1	6	ENSG00000155158	GENE-processed_transcript,protein_coding,retained_intron	158219	TTC39B	TTC39B		false	158219	132	0	1	ASSOCIATED_NEW_GENE	0	0.99106	false	0	158219	0	0	[H0YAJ6, Q5VTQ0]	158219
			3.20811	0			3.Intra Cellular	3.Intra Cellular	0.31171	1	6	ENSG00000100304	GENE-processed_transcript,protein_coding,retained_intron	23170	TTLL12	TTLL12		false	23170	315	0	1	ASSOCIATED_NEW_GENE	0	0.99299	false	0	23170	0	0	[A0A024R4U3, Q14166, V9GY16]	23170
			5.45946	0			3.Intra Cellular	3.Intra Cellular	0.183168	1	6	ENSG00000175106	GENE-nonsense_mediated_decay,processed_transcript,protein_coding	201158	TVP23C	TVP23C		false	201158	25	0	1	ASSOCIATED_NEW_GENE	0	0.985843	false	0	201158	0	0	[C9JPH1, C9JYS5, E5RIS5, J3QL47, K7EK95, Q96ET8]	201158
			3.81622	0			1.Extracellular	1.Extracellular, 3.Intra Cellular, 5.Nucleus	0.26204	1	6	ENSG00000100348	GENE-nonsense_mediated_decay,processed_transcript,protein_coding	25828	TXN2	TXN2		false	25828	132	0	1	ASSOCIATED_NEW_GENE	0	0.99106	false	0	25828	0	0	[F8WDN2, M0QXH0, Q99757]	25828
			3.20811	0			3.Intra Cellular	3.Intra Cellular	0.31171	1	6	ENSG00000265972	GENE-protein_coding,retained_intron	10628	TXNIP	TXNIP		false	10628	315	0	1	ASSOCIATED_NEW_GENE	0	0.99299	false	0	10628	0	0	[B1ALI9, L8E7V6, Q9H3M7]	10628
			3.20811	0			0.Annotation definition not found in 'Homo Sapiens.properties' file	0.Annotation definition not found in 'Homo Sapiens.properties' file	0.31171	1	6	ENSG00000163714	GENE-nonsense_mediated_decay,processed_transcript,protein_coding,retained_intron	23350	U2SURP	U2SURP		false	23350	315	0	1	ASSOCIATED_NEW_GENE	0	0.99299	false	0	23350	0	0	[C9J5L1, C9JDJ7, E7ET15, E7EW00, H0Y8D9, H7C4V2, L8E737, O15042, U3KPT1]	23350
			3.59459	0			1.Extracellular	1.Extracellular, 2.Plasma Membrane, 3.Intra Cellular	0.278195	1	4	ENSG00000109332	GENE-nonsense_mediated_decay,processed_transcript,protein_coding,retained_intron	7323	UBE2D3	UBE2D3		false	7323	147	0	1	ASSOCIATED_NEW_GENE	0	0.991763	false	0	7323	0	0	[A0A024RDH2, A0A024RDJ6, A0A087WY85, D6R933, D6R980, D6R9F6, D6RA11, D6RAH7, D6RAW0, D6RGD0, D6RIZ3, D6RJB3, H9KV45, P61077]	7323
			3.20811	0			3.Intra Cellular	3.Intra Cellular	0.31171	1	6	ENSG00000108106	GENE-processed_transcript,protein_coding	27338	UBE2S	UBE2S		false	27338	315	0	1	ASSOCIATED_NEW_GENE	0	0.99299	false	0	27338	0	0	[K7EM75, K7EPJ1, Q16763, Q6NXQ4]	27338
			4.24865	0			3.Intra Cellular	3.Intra Cellular	0.235369	1	6	ENSG00000138629	GENE-protein_coding	84993	UBL7	UBL7		false	84993	48	0	1	ASSOCIATED_NEW_GENE	0	0.989687	false	0	84993	0	0	[D3DW56, H3BSE0, H3BSQ2, H3BUV9, H3BV23, Q96S82]	84993
			3.59459	0			2.Plasma Membrane	2.Plasma Membrane, 3.Intra Cellular	0.278195	1	4	ENSG00000135018	GENE-protein_coding,retained_intron	29979	UBQLN1	UBQLN1		false	29979	147	0	1	ASSOCIATED_NEW_GENE	0	0.991763	false	0	29979	0	0	[A0A024R258, H0YDS0, H0YEZ9, Q9UMX0]	29979
			3.20811	0			2.Plasma Membrane	2.Plasma Membrane, 3.Intra Cellular	0.31171	1	6	ENSG00000188021	GENE-protein_coding	29978	UBQLN2	UBQLN2		false	29978	315	0	1	ASSOCIATED_NEW_GENE	0	0.99299	false	0	29978	0	0	[Q9UHD9]	29978
			3.59459	0			3.Intra Cellular	3.Intra Cellular	0.278195	1	4	ENSG00000144357	GENE-nonsense_mediated_decay,processed_transcript,protein_coding,retained_intron	130507	UBR3	UBR3		false	130507	147	0	1	ASSOCIATED_NEW_GENE	0	0.991763	false	0	130507	0	0	[F8WEB7, H0Y3K2, H7BZD8, H7C481, Q6ZT12]	130507
			3.20811	0			2.Plasma Membrane	2.Plasma Membrane, 3.Intra Cellular	0.31171	1	6	ENSG00000127481	GENE-processed_transcript,protein_coding,retained_intron	23352	UBR4	UBR4		false	23352	315	0	1	ASSOCIATED_NEW_GENE	0	0.99299	false	0	23352	0	0	[A0A0A0MSW0, L0R6T5, Q5T4S7, Q5TBN9, Q96HY5, X6R960, X6RE05]	23352
			3.20811	0			3.Intra Cellular	3.Intra Cellular	0.31171	1	6	ENSG00000215114	GENE-nonsense_mediated_decay,processed_transcript,protein_coding	137886	UBXN2B	UBXN2B		false	137886	315	0	1	ASSOCIATED_NEW_GENE	0	0.99299	false	0	137886	0	0	[E5RGJ4, E5RJ36, H0YAX6, Q14CS0]	137886
			3.76757	0			3.Intra Cellular	3.Intra Cellular	0.265423	1	6	ENSG00000175567	GENE-processed_transcript,protein_coding,retained_intron	7351	UCP2	UCP2		false	7351	108	0	1	ASSOCIATED_NEW_GENE	0	0.991214	false	0	7351	0	0	[A0A024R5N5, F5GX45, F5H312, H0YFQ0, P55851]	7351
			3.76757	0			3.Intra Cellular	3.Intra Cellular	0.265423	1	6	ENSG00000109181	GENE-protein_coding	7365	UGT2B10	UGT2B10		false	7365	108	0	1	ASSOCIATED_NEW_GENE	0	0.991214	false	0	7365	0	0	[P36537]	7365
			3.20811	0			0.Annotation definition not found in 'Homo Sapiens.properties' file	0.Annotation definition not found in 'Homo Sapiens.properties' file	0.31171	1	6	ENSG00000276043	GENE-protein_coding	29128	UHRF1	UHRF1		false	29128	315	0	1	ASSOCIATED_NEW_GENE	0	0.99299	false	0	29128	0	0	[A0A087WTW0, A0A087WVR3, A0A087WWG9, L8ECE3, Q96T88]	29128
			3.20811	0			1.Extracellular	1.Extracellular, 2.Plasma Membrane, 3.Intra Cellular	0.31171	1	6	ENSG00000131015	GENE-protein_coding	80328	ULBP2	ULBP2		false	80328	315	0	1	ASSOCIATED_NEW_GENE	0	0.99299	false	0	80328	0	0	[Q9BZM5]	80328
			3.59459	0			2.Plasma Membrane	2.Plasma Membrane, 3.Intra Cellular	0.278195	1	4	ENSG00000130477	GENE-protein_coding,retained_intron	23025	UNC13A	UNC13A		false	23025	147	0	1	ASSOCIATED_NEW_GENE	0	0.991763	false	0	23025	0	0	[F8VZH8, F8W059, F8W0P6, Q9UPW8]	23025
			3.59459	0			0.Annotation definition not found in 'Homo Sapiens.properties' file	0.Annotation definition not found in 'Homo Sapiens.properties' file	0.278195	1	4	ENSG00000270617	GENE-protein_coding	100534592	URGCP-MRPS24	URGCP-MRPS24		false	100534592	147	0	1	ASSOCIATED_NEW_GENE	0	0.991763	false	0	100534592	0	0	[S4R325]	100534592
			3.20811	0			3.Intra Cellular	3.Intra Cellular	0.31171	1	6	ENSG00000111962	GENE-processed_transcript,protein_coding	10090	UST	UST		false	10090	315	0	1	ASSOCIATED_NEW_GENE	0	0.99299	false	0	10090	0	0	[Q9Y2C2]	10090
			3.20811	0			3.Intra Cellular	3.Intra Cellular, 5.Nucleus	0.31171	1	6	ENSG00000156697	GENE-processed_transcript,protein_coding	10813	UTP14A	UTP14A		false	10813	315	0	1	ASSOCIATED_NEW_GENE	0	0.99299	false	0	10813	0	0	[Q9BVJ6, X6RJY0]	10813
			3.20811	0			2.Plasma Membrane	2.Plasma Membrane, 3.Intra Cellular	0.31171	1	6	ENSG00000220205	GENE-protein_coding	6844	VAMP2	VAMP2		false	6844	315	0	1	ASSOCIATED_NEW_GENE	0	0.99299	false	0	6844	0	0	[F8WCA0, J3QRU4, K7ENK9, P63027]	6844
			3.20811	0			1.Extracellular	1.Extracellular, 2.Plasma Membrane, 3.Intra Cellular	0.31171	1	6	ENSG00000168140	GENE-protein_coding	114990	VASN	VASN		false	114990	315	0	1	ASSOCIATED_NEW_GENE	0	0.99299	false	0	114990	0	0	[Q6EMK4]	114990
			3.20811	0			2.Plasma Membrane	2.Plasma Membrane, 3.Intra Cellular	0.31171	1	6	ENSG00000134215	GENE-nonsense_mediated_decay,processed_transcript,protein_coding,retained_intron	10451	VAV3	VAV3		false	10451	315	0	1	ASSOCIATED_NEW_GENE	0	0.99299	false	0	10451	0	0	[A0A2X0U2Q1, E9PMJ5, H0YCG7, H0YDG2, Q9UKW4]	10451
			3.59459	0			1.Extracellular	1.Extracellular, 2.Plasma Membrane, 3.Intra Cellular	0.278195	1	4	ENSG00000162692	GENE-nonsense_mediated_decay,protein_coding,retained_intron	7412	VCAM1	VCAM1		false	7412	147	0	1	ASSOCIATED_NEW_GENE	0	0.991763	false	0	7412	0	0	[A0A3B3ISS8, E9PDD2, F2YYR6, F8UU18, F8UV74, G0ZFQ0, G0ZI12, P19320]	7412
			3.76757	0			3.Intra Cellular	3.Intra Cellular	0.265423	1	6	ENSG00000167397	GENE-protein_coding	79001	VKORC1	VKORC1		false	79001	108	0	1	ASSOCIATED_NEW_GENE	0	0.991214	false	0	79001	0	0	[A0A0B5EEB2, A0A0B5EFL6, A0A0S2Z5X7, A0A0S2Z6I4, A8MV79, B5B596, E2DSP6, E7BQW0, F2Z3Q2, F8W9H0, H0YF24, I3L1P9, Q9BQB6]	79001
			3.20811	0			1.Extracellular	1.Extracellular, 3.Intra Cellular	0.31171	1	6	ENSG00000176428	GENE-protein_coding	155382	VPS37D	VPS37D		false	155382	315	0	1	ASSOCIATED_NEW_GENE	0	0.99299	false	0	155382	0	0	[C9JYT9, Q86XT2]	155382
			3.81622	0			3.Intra Cellular	3.Intra Cellular	0.26204	1	6	ENSG00000166887	GENE-nonsense_mediated_decay,processed_transcript,protein_coding,retained_intron	23339	VPS39	VPS39		false	23339	132	0	1	ASSOCIATED_NEW_GENE	0	0.99106	false	0	23339	0	0	[A0A024R9L9, H3BTU0, Q96JC1]	23339
			3.20811	0			3.Intra Cellular	3.Intra Cellular	0.31171	1	6	ENSG00000136631	GENE-nonsense_mediated_decay,processed_transcript,protein_coding,retained_intron	11311	VPS45	VPS45		false	11311	315	0	1	ASSOCIATED_NEW_GENE	0	0.99299	false	0	11311	0	0	[A0A087WU65, A0A1B0GXI6, A0A2R8Y7W9, A0A2R8YD95, A0A2R8YDP1, A0A2R8YE10, A0A2R8YEX8, A0A2R8YF01, B7Z360, B7Z5D4, B7Z7G7, Q5T4Q0, Q9NRW7]	11311
			4.24865	0			3.Intra Cellular	3.Intra Cellular	0.235369	1	6	ENSG00000114742	GENE-nonsense_mediated_decay,processed_transcript,protein_coding	57599	WDR48	WDR48		false	57599	48	0	1	ASSOCIATED_NEW_GENE	0	0.989687	false	0	57599	0	0	[A0A024R2L1, C9JC24, F8W6P2, F8W7Q3, F8W7Y5, F8W9K4, L8EA86, Q8TAF3]	57599
			3.81622	0			2.Plasma Membrane	2.Plasma Membrane, 3.Intra Cellular	0.26204	1	6	ENSG00000178252	GENE-nonsense_mediated_decay,processed_transcript,protein_coding,retained_intron	11180	WDR6	WDR6		false	11180	132	0	1	ASSOCIATED_NEW_GENE	0	0.99106	false	0	11180	0	0	[A0A087X295, B3KRR8, B4E256, C9JFP6, C9K020, E5RFX3, E9PBK6, E9PDU5, F8WE36, Q6AZD6, Q6PKC6, Q9H9M3, Q9NNW5, V9GYU1, V9GZ48, V9GZ65]	11180
			3.81622	0			1.Extracellular	1.Extracellular, 3.Intra Cellular	0.26204	1	6	ENSG00000134684	GENE-nonsense_mediated_decay,processed_transcript,protein_coding,retained_intron	8565	YARS1	YARS1		false	8565	132	0	1	ASSOCIATED_NEW_GENE	0	0.99106	false	0	8565	0	0	[A0A0C4DGZ5, A0A0S2Z4R1, A0A6Q8PF15, A0A6Q8PFC1, A0A6Q8PFX2, A0A6Q8PFX4, A0A6Q8PGW2, P54577]	8565
			3.81622	0			2.Plasma Membrane	2.Plasma Membrane, 3.Intra Cellular	0.26204	1	6	ENSG00000196449	GENE-protein_coding	79693	YRDC	YRDC		false	79693	132	0	1	ASSOCIATED_NEW_GENE	0	0.99106	false	0	79693	0	0	[Q86U90]	79693
			3.20811	0	Transcription Factor Complex		3.Intra Cellular	3.Intra Cellular	0.31171	1	6	ENSG00000100811	GENE-nonsense_mediated_decay,protein_coding,retained_intron	7528	YY1	YY1		false	7528	315	0	1	ASSOCIATED_NEW_GENE	0	0.99299	false	0	7528	0	0	[A0A494C032, G3V3M8, H0YJU4, H0YJV7, P25490]	7528
			3.20811	0			2.Plasma Membrane	2.Plasma Membrane, 3.Intra Cellular	0.31171	1	6	ENSG00000115085	GENE-processed_transcript,protein_coding,retained_intron	7535	ZAP70	ZAP70		false	7535	315	0	1	ASSOCIATED_NEW_GENE	0	0.99299	false	0	7535	0	0	[P43403]	7535
			3.81622	0			0.Annotation definition not found in 'Homo Sapiens.properties' file	0.Annotation definition not found in 'Homo Sapiens.properties' file	0.26204	1	6	ENSG00000205189	GENE-protein_coding	65986	ZBTB10	ZBTB10		false	65986	132	0	1	ASSOCIATED_NEW_GENE	0	0.99106	false	0	65986	0	0	[A8E4L4, Q96DT7, Q9H9H3]	65986
			3.81622	0			3.Intra Cellular	3.Intra Cellular	0.26204	1	6	ENSG00000173276	GENE-processed_transcript,protein_coding	49854	ZBTB21	ZBTB21		false	49854	132	0	1	ASSOCIATED_NEW_GENE	0	0.99106	false	0	49854	0	0	[E7EVF9, Q5H9S0, Q5KS07, Q9ULJ3]	49854
			3.76757	0			0.Annotation definition not found in 'Homo Sapiens.properties' file	0.Annotation definition not found in 'Homo Sapiens.properties' file	0.265423	1	6	ENSG00000185278	GENE-protein_coding	84614	ZBTB37	ZBTB37		false	84614	108	0	1	ASSOCIATED_NEW_GENE	0	0.991214	false	0	84614	0	0	[B7Z7Z4, Q5TC79]	84614
			3.81622	0			0.Annotation definition not found in 'Homo Sapiens.properties' file	0.Annotation definition not found in 'Homo Sapiens.properties' file	0.26204	1	6	ENSG00000058673	GENE-nonsense_mediated_decay,processed_transcript,protein_coding	9877	ZC3H11A	ZC3H11A		false	9877	132	0	1	ASSOCIATED_NEW_GENE	0	0.99106	false	0	9877	0	0	[A0A1W2PPR9, C9J0L0, E9PBY7, E9PQ61, O75152, Q0D2N5]	9877
			3.20811	0			3.Intra Cellular	3.Intra Cellular	0.31171	1	6	ENSG00000130749	GENE-processed_transcript,protein_coding,retained_intron	23211	ZC3H4	ZC3H4		false	23211	315	0	1	ASSOCIATED_NEW_GENE	0	0.99299	false	0	23211	0	0	[M0QY97, Q9UPT8]	23211
			3.59459	0			3.Intra Cellular	3.Intra Cellular	0.278195	1	4	ENSG00000139168	GENE-processed_transcript,protein_coding,retained_intron	85437	ZCRB1	ZCRB1		false	85437	147	0	1	ASSOCIATED_NEW_GENE	0	0.991763	false	0	85437	0	0	[A0A024R106, F8VXY6, G3V1V1, Q05DR1, Q8TBF4]	85437
			3.59459	0			3.Intra Cellular	3.Intra Cellular	0.278195	1	4	ENSG00000174165	GENE-nonsense_mediated_decay,processed_transcript,protein_coding	254359	ZDHHC24	ZDHHC24		false	254359	147	0	1	ASSOCIATED_NEW_GENE	0	0.991763	false	0	254359	0	0	[E9PI61, E9PLR9, Q6UX98]	254359
			3.76757	0			0.Annotation definition not found in 'Homo Sapiens.properties' file	0.Annotation definition not found in 'Homo Sapiens.properties' file	0.265423	1	6	ENSG00000196867	GENE-nonsense_mediated_decay,processed_transcript,protein_coding,retained_intron	140612	ZFP28	ZFP28		false	140612	108	0	1	ASSOCIATED_NEW_GENE	0	0.991214	false	0	140612	0	0	[A0JNV5, K7EL00, Q8NHY6, Q9UQD2]	140612
			3.81622	0			0.Annotation definition not found in 'Homo Sapiens.properties' file	0.Annotation definition not found in 'Homo Sapiens.properties' file	0.26204	1	6	ENSG00000174306	GENE-processed_transcript,protein_coding	23051	ZHX3	ZHX3		false	23051	132	0	1	ASSOCIATED_NEW_GENE	0	0.99106	false	0	23051	0	0	[A0A0A0MST6, A0A0A0MSU5, F6UBH9, F6UQN6, H0Y6F5, H0YLR4, H0YNY7, Q9H4I2]	23051
			3.76757	0			0.Annotation definition not found in 'Homo Sapiens.properties' file	0.Annotation definition not found in 'Homo Sapiens.properties' file	0.265423	1	6	ENSG00000165061	GENE-nonsense_mediated_decay,processed_transcript,protein_coding,retained_intron	79698	ZMAT4	ZMAT4		false	79698	108	0	1	ASSOCIATED_NEW_GENE	0	0.991214	false	0	79698	0	0	[E5RFW2, E5RGZ7, E5RIF5, Q9H898]	79698
			3.59459	0			0.Annotation definition not found in 'Homo Sapiens.properties' file	0.Annotation definition not found in 'Homo Sapiens.properties' file	0.278195	1	4	ENSG00000162702	GENE-protein_coding	23528	ZNF281	ZNF281		false	23528	147	0	1	ASSOCIATED_NEW_GENE	0	0.991763	false	0	23528	0	0	[B3KMX4, Q9Y2X9]	23528
			5.45946	0			3.Intra Cellular	3.Intra Cellular, 5.Nucleus	0.183168	1	6	ENSG00000165244	GENE-protein_coding	195828	ZNF367	ZNF367		false	195828	25	0	1	ASSOCIATED_NEW_GENE	0	0.985843	false	0	195828	0	0	[Q7RTV3]	195828
			3.81622	0			0.Annotation definition not found in 'Homo Sapiens.properties' file	0.Annotation definition not found in 'Homo Sapiens.properties' file	0.26204	1	6	ENSG00000173480	GENE-protein_coding	147687	ZNF417	ZNF417		false	147687	132	0	1	ASSOCIATED_NEW_GENE	0	0.99106	false	0	147687	0	0	[M0QXH9, M0R0M6, M0R0V5, M0R178, M0R230, M0R267, Q8TAU3]	147687
			3.59459	0			0.Annotation definition not found in 'Homo Sapiens.properties' file	0.Annotation definition not found in 'Homo Sapiens.properties' file	0.278195	1	4	ENSG00000197013	GENE-processed_transcript,protein_coding	353088	ZNF429	ZNF429		false	353088	147	0	1	ASSOCIATED_NEW_GENE	0	0.991763	false	0	353088	0	0	[A0A087WV98, M0QYC4, M0QZ47, Q86V71]	353088
			3.59459	0			0.Annotation definition not found in 'Homo Sapiens.properties' file	0.Annotation definition not found in 'Homo Sapiens.properties' file	0.278195	1	4	ENSG00000142556	GENE-nonsense_mediated_decay,protein_coding	80110	ZNF614	ZNF614		false	80110	147	0	1	ASSOCIATED_NEW_GENE	0	0.991763	false	0	80110	0	0	[M0QYG4, M0R1H2, Q8N883]	80110
			3.59459	0			0.Annotation definition not found in 'Homo Sapiens.properties' file	0.Annotation definition not found in 'Homo Sapiens.properties' file	0.278195	1	4	ENSG00000172888	GENE-processed_transcript,protein_coding,retained_intron	285268	ZNF621	ZNF621		false	285268	147	0	1	ASSOCIATED_NEW_GENE	0	0.991763	false	0	285268	0	0	[C9JM43, C9JZC2, Q6ZSS3]	285268
			3.81622	0			0.Annotation definition not found in 'Homo Sapiens.properties' file	0.Annotation definition not found in 'Homo Sapiens.properties' file	0.26204	1	6	ENSG00000196757	GENE-protein_coding	90592	ZNF700	ZNF700		false	90592	132	0	1	ASSOCIATED_NEW_GENE	0	0.99106	false	0	90592	0	0	[A0A087WVH9, K7EQV7, Q9H0M5]	90592
			3.59459	0			0.Annotation definition not found in 'Homo Sapiens.properties' file	0.Annotation definition not found in 'Homo Sapiens.properties' file	0.278195	1	4	ENSG00000183850	GENE-protein_coding	100129543	ZNF730	ZNF730		false	100129543	147	0	1	ASSOCIATED_NEW_GENE	0	0.991763	false	0	100129543	0	0	[M0QYG2, M0QYI4, Q6ZMV8]	100129543
			3.81622	0			0.Annotation definition not found in 'Homo Sapiens.properties' file	0.Annotation definition not found in 'Homo Sapiens.properties' file	0.26204	1	6	ENSG00000204524	GENE-protein_coding	390980	ZNF805	ZNF805		false	390980	132	0	1	ASSOCIATED_NEW_GENE	0	0.99106	false	0	390980	0	0	[B9EIQ3, Q5CZA5]	390980
			3.20811	0			0.Annotation definition not found in 'Homo Sapiens.properties' file	0.Annotation definition not found in 'Homo Sapiens.properties' file	0.31171	1	6	ENSG00000214941	GENE-nonsense_mediated_decay,processed_transcript,protein_coding	125150	ZSWIM7	ZSWIM7		false	125150	315	0	1	ASSOCIATED_NEW_GENE	0	0.99299	false	0	125150	0	0	[A0A024RD64, J3KRY0, J3QL97, J3QLK2, J3QRT4, J3QS07, J3QS31, Q19AV6]	125150
			5.45946	0			3.Intra Cellular	3.Intra Cellular	0.183168	1	6	ENSG00000122952	GENE-nonsense_mediated_decay,processed_transcript,protein_coding,retained_intron	11130	ZWINT	ZWINT		false	11130	25	0	1	ASSOCIATED_NEW_GENE	0	0.985843	false	0	11130	0	0	[A0A024QZJ1, A0A024QZN5, A6NH27, O95229, R4GMS7]	11130
200	0	100	0	0			0.Annotation definition not found in 'Homo Sapiens.properties' file	0.Annotation definition not found in 'Homo Sapiens.properties' file	0	0	0			ASSOCIATED_GENE	pal-miR-378c-5p	pal-miR-378c-5p	NaN	true	MIMAT0040369	0	0	0	ASSOCIATED_GENE	0	Infinity	false	0	MIMAT0040369	0	0		MIMAT0040369

## Sheet: CluePedia MTI edges
edge-label	EDGE_UNIQUE_SUID	Edge Betweenness	EVIDENCE_CODE	INITIAL_SOURCE_NAME	INITIAL_TARGET_NAME	interaction	INTERACTION_TYPE	Kappa Score	name	selected	shared interaction	shared name	SIGNUM	SOURCE_NAME	SOURCE_SYMBOL_NAME	TARGET_NAME	TARGET_SYMBOL_NAME	UNIQUE_ID	validated miRNA	validated miRTarBase
validated miRNA miRecords	6572	1480		NM_004655	hsa-miR-34a	gene-gene-pos	+validated miRNA	1		false	gene-gene-pos		+validated miRNA	8313	AXIN2	MIMAT0000255	hsa-miR-34a-5p	8313 (validated miRNA) MIMAT0000255	1
validated miRNA miRecords	6251	10743.4		NM_000633	hsa-miR-34a	gene-gene-pos	+validated miRNA	1		false	gene-gene-pos		+validated miRNA	596	BCL2	MIMAT0000255	hsa-miR-34a-5p	596 (validated miRNA) MIMAT0000255	1
validated miRNA miRecords	6602	1480		NM_001229	hsa-miR-133a	gene-gene-pos	+validated miRNA	1		false	gene-gene-pos		+validated miRNA	842	CASP9	MIMAT0000427	hsa-miR-133a	842 (validated miRNA) MIMAT0000427	1
validated miRNA miRecords	6245	9303.39		NM_053056	hsa-miR-34a	gene-gene-pos	+validated miRNA	1		false	gene-gene-pos		+validated miRNA	595	CCND1	MIMAT0000255	hsa-miR-34a-5p	595 (validated miRNA) MIMAT0000255	1
validated miRNA miRecords	4456	1480		NM_001259	hsa-miR-34a	gene-gene-pos	+validated miRNA	1		false	gene-gene-pos		+validated miRNA	1021	CDK6	MIMAT0000255	hsa-miR-34a-5p	1021 (validated miRNA) MIMAT0000255	1
validated miRNA miRecords	5489	1480		NM_005618	hsa-miR-34a	gene-gene-pos	+validated miRNA	1		false	gene-gene-pos		+validated miRNA	28514	DLL1	MIMAT0000255	hsa-miR-34a-5p	28514 (validated miRNA) MIMAT0000255	1
validated miRNA miRecords	5012	9303.39		NM_001949	hsa-miR-34a	gene-gene-pos	+validated miRNA	1		false	gene-gene-pos		+validated miRNA	1871	E2F3	MIMAT0000255	hsa-miR-34a-5p	1871 (validated miRNA) MIMAT0000255	1
validated miRNA miRecords	4994	1480		NM_000214	hsa-miR-34a	gene-gene-pos	+validated miRNA	1		false	gene-gene-pos		+validated miRNA	182	JAG1	MIMAT0000255	hsa-miR-34a-5p	182 (validated miRNA) MIMAT0000255	1
validated miRNA miRecords	5789	1480		NM_172057	hsa-miR-133a	gene-gene-pos	+validated miRNA	1		false	gene-gene-pos		+validated miRNA	3757	KCNH2	MIMAT0000427	hsa-miR-133a	3757 (validated miRNA) MIMAT0000427	1
validated miRNA miRecords	5795	1480		NM_000218	hsa-miR-133a	gene-gene-pos	+validated miRNA	1		false	gene-gene-pos		+validated miRNA	3784	KCNQ1	MIMAT0000427	hsa-miR-133a	3784 (validated miRNA) MIMAT0000427	1
validated miRNA miRecords	5516	1480		NM_014079	hsa-miR-133a	gene-gene-pos	+validated miRNA	1		false	gene-gene-pos		+validated miRNA	28999	KLF15	MIMAT0000427	hsa-miR-133a	28999 (validated miRNA) MIMAT0000427	1
validated miRNA miRecords	6164	1480		NM_002755	hsa-miR-34a	gene-gene-pos	+validated miRNA	1		false	gene-gene-pos		+validated miRNA	5604	MAP2K1	MIMAT0000255	hsa-miR-34a-5p	5604 (validated miRNA) MIMAT0000255	1
validated miRNA miRecords	5906	1480		NM_000245	hsa-miR-34a	gene-gene-pos	+validated miRNA	1		false	gene-gene-pos		+validated miRNA	4233	MET	MIMAT0000255	hsa-miR-34a-5p	4233 (validated miRNA) MIMAT0000255	1
validated miRNA miRecords	5930	1480		NM_005375	hsa-miR-34a	gene-gene-pos	+validated miRNA	1		false	gene-gene-pos		+validated miRNA	4602	MYB	MIMAT0000255	hsa-miR-34a-5p	4602 (validated miRNA) MIMAT0000255	1
validated miRNA miRecords	5939	1480		NM_005378	hsa-miR-34a	gene-gene-pos	+validated miRNA	1		false	gene-gene-pos		+validated miRNA	4613	MYCN	MIMAT0000255	hsa-miR-34a-5p	4613 (validated miRNA) MIMAT0000255	1
validated miRNA miRecords	5948	1480		NM_017617	hsa-miR-34a	gene-gene-pos	+validated miRNA	1		false	gene-gene-pos		+validated miRNA	4851	NOTCH1	MIMAT0000255	hsa-miR-34a-5p	4851 (validated miRNA) MIMAT0000255	1
validated miRNA miRecords	5954	1480		NM_024408	hsa-miR-34a	gene-gene-pos	+validated miRNA	1		false	gene-gene-pos		+validated miRNA	4853	NOTCH2	MIMAT0000255	hsa-miR-34a-5p	4853 (validated miRNA) MIMAT0000255	1
validated miRNA miRecords	6050	1480		NM_182471	hsa-miR-133a	gene-gene-pos	+validated miRNA	1		false	gene-gene-pos		+validated miRNA	5315	PKM	MIMAT0000427	hsa-miR-133a	5315 (validated miRNA) MIMAT0000427	1
validated miRNA miRecords	5825	1480		NM_001664	hsa-miR-133a	gene-gene-pos	+validated miRNA	1		false	gene-gene-pos		+validated miRNA	387	RHOA	MIMAT0000427	hsa-miR-133a	387 (validated miRNA) MIMAT0000427	1
validated miRNA miRecords	5258	1480		NM_012238	hsa-miR-34a	gene-gene-pos	+validated miRNA	1		false	gene-gene-pos		+validated miRNA	23411	SIRT1	MIMAT0000255	hsa-miR-34a-5p	23411 (validated miRNA) MIMAT0000255	1
validated miRNA miRecords	4739	1480		NM_052910	hsa-miR-24-1*	gene-gene-pos	+validated miRNA	1		false	gene-gene-pos		+validated miRNA	114798	SLITRK1	MIMAT0000079	hsa-miR-24-1-5p	114798 (validated miRNA) MIMAT0000079	1
validated miRNA miRecords	6458	1480		NM_005430	hsa-miR-34a	gene-gene-pos	+validated miRNA	1		false	gene-gene-pos		+validated miRNA	7471	WNT1	MIMAT0000255	hsa-miR-34a-5p	7471 (validated miRNA) MIMAT0000255	1
validated miRTarBase	5081	1480	21566225	2180	hsa-miR-34a-5p	gene-gene-pos	+validated miRTarBase	1	21566225	false	gene-gene-pos	21566225	+validated miRTarBase	2180	ACSL1	MIMAT0000255	hsa-miR-34a-5p	2180 (validated miRTarBase) MIMAT0000255		1
validated miRTarBase	5084	1480	21566225	2182	hsa-miR-34a-5p	gene-gene-pos	+validated miRTarBase	1	21566225	false	gene-gene-pos	21566225	+validated miRTarBase	2182	ACSL4	MIMAT0000255	hsa-miR-34a-5p	2182 (validated miRTarBase) MIMAT0000255		1
validated miRTarBase	5630	1480	24715690	302	hsa-miR-133a-3p	gene-gene-pos	+validated miRTarBase	1	24715690	false	gene-gene-pos	24715690	+validated miRTarBase	302	ANXA2	MIMAT0000427	hsa-miR-133a	302 (validated miRTarBase) MIMAT0000427		1
validated miRTarBase	5759	1480	23145211	367	hsa-miR-34a-5p	gene-gene-pos	+validated miRTarBase	1	23145211	false	gene-gene-pos	23145211	+validated miRTarBase	367	AR	MIMAT0000255	hsa-miR-34a-5p	367 (validated miRTarBase) MIMAT0000255		1
validated miRTarBase	5858	1480	23349340	397	hsa-miR-34a-5p	gene-gene-pos	+validated miRTarBase	1	23349340	false	gene-gene-pos	23349340	+validated miRTarBase	397	ARHGDIB	MIMAT0000255	hsa-miR-34a-5p	397 (validated miRTarBase) MIMAT0000255		1
validated miRTarBase	6575	1480	19336450	8313	hsa-miR-34a-5p	gene-gene-pos	+validated miRTarBase	1	19336450	false	gene-gene-pos	19336450	+validated miRTarBase	8313	AXIN2	MIMAT0000255	hsa-miR-34a-5p	8313 (validated miRTarBase) MIMAT0000255		1
validated miRTarBase	6161	1480	21566225|21814748	558	hsa-miR-34a-5p	gene-gene-pos	+validated miRTarBase	1	21566225|21814748	false	gene-gene-pos	21566225|21814748	+validated miRTarBase	558	AXL	MIMAT0000255	hsa-miR-34a-5p	558 (validated miRTarBase) MIMAT0000255		1
validated miRTarBase	6257	10147.7	22967897	596	hsa-miR-136-5p	gene-gene-pos	+validated miRTarBase	1	22967897	false	gene-gene-pos	22967897	+validated miRTarBase	596	BCL2	MIMAT0000448	hsa-miR-136-5p	596 (validated miRTarBase) MIMAT0000448		1
validated miRTarBase	6260	1480	23756231	598	hsa-miR-133a-3p	gene-gene-pos	+validated miRTarBase	1	23756231	false	gene-gene-pos	23756231	+validated miRTarBase	598	BCL2L1	MIMAT0000427	hsa-miR-133a	598 (validated miRTarBase) MIMAT0000427		1
validated miRTarBase	5690	9303.39	23264087|24068565	332	hsa-miR-34a-5p	gene-gene-pos	+validated miRTarBase	1	23264087|24068565	false	gene-gene-pos	23264087|24068565	+validated miRTarBase	332	BIRC5	MIMAT0000255	hsa-miR-34a-5p	332 (validated miRTarBase) MIMAT0000255		1
validated miRTarBase	6344	1480	23226240	655	hsa-miR-34a-5p	gene-gene-pos	+validated miRTarBase	1	23226240	false	gene-gene-pos	23226240	+validated miRTarBase	655	BMP7	MIMAT0000255	hsa-miR-34a-5p	655 (validated miRTarBase) MIMAT0000255		1
validated miRTarBase	6479	1480	19136465	775	hsa-miR-133a-3p	gene-gene-pos	+validated miRTarBase	1	19136465	false	gene-gene-pos	19136465	+validated miRTarBase	775	CACNA1C	MIMAT0000427	hsa-miR-133a	775 (validated miRTarBase) MIMAT0000427		1
validated miRTarBase	6605	1480	17715156	842	hsa-miR-133a-3p	gene-gene-pos	+validated miRTarBase	1	17715156	false	gene-gene-pos	17715156	+validated miRTarBase	842	CASP9	MIMAT0000427	hsa-miR-133a	842 (validated miRTarBase) MIMAT0000427		1
validated miRTarBase	4393	1480	23533633	100133941	hsa-miR-34a-5p	gene-gene-pos	+validated miRTarBase	1	23533633	false	gene-gene-pos	23533633	+validated miRTarBase	100133941	CD24	MIMAT0000255	hsa-miR-34a-5p	100133941 (validated miRTarBase) MIMAT0000255		1
validated miRTarBase	6752	1480	21240262|24423412	960	hsa-miR-34a-5p	gene-gene-pos	+validated miRTarBase	1	21240262|24423412	false	gene-gene-pos	21240262|24423412	+validated miRTarBase	960	CD44	MIMAT0000255	hsa-miR-34a-5p	960 (validated miRTarBase) MIMAT0000255		1
validated miRTarBase	6815	1480	25152372	998	hsa-miR-133a-3p	gene-gene-pos	+validated miRTarBase	1	25152372	false	gene-gene-pos	25152372	+validated miRTarBase	998	CDC42	MIMAT0000427	hsa-miR-133a	998 (validated miRTarBase) MIMAT0000427		1
validated miRTarBase	4535	1480	21128241	1031	hsa-miR-34a-5p	gene-gene-pos	+validated miRTarBase	1	21128241	false	gene-gene-pos	21128241	+validated miRTarBase	1031	CDKN2C	MIMAT0000255	hsa-miR-34a-5p	1031 (validated miRTarBase) MIMAT0000255		1
validated miRTarBase	4805	1480	21769867	1277	hsa-miR-133a-3p	gene-gene-pos	+validated miRTarBase	1	21769867	false	gene-gene-pos	21769867	+validated miRTarBase	1277	COL1A1	MIMAT0000427	hsa-miR-133a	1277 (validated miRTarBase) MIMAT0000427		1
validated miRTarBase	4859	1480	24198819	1436	hsa-miR-34a-5p	gene-gene-pos	+validated miRTarBase	1	24198819	false	gene-gene-pos	24198819	+validated miRTarBase	1436	CSF1R	MIMAT0000255	hsa-miR-34a-5p	1436 (validated miRTarBase) MIMAT0000255		1
validated miRTarBase	4904	1480	24393844	1536	hsa-miR-34a-5p	gene-gene-pos	+validated miRTarBase	1	24393844	false	gene-gene-pos	24393844	+validated miRTarBase	1536	CYBB	MIMAT0000255	hsa-miR-34a-5p	1536 (validated miRTarBase) MIMAT0000255		1
validated miRTarBase	4970	1480	24147106	1716	hsa-miR-34a-5p	gene-gene-pos	+validated miRTarBase	1	24147106	false	gene-gene-pos	24147106	+validated miRTarBase	1716	DGUOK	MIMAT0000255	hsa-miR-34a-5p	1716 (validated miRTarBase) MIMAT0000255		1
validated miRTarBase	5492	1480	14697198|19461653|20144220|23327670	28514	hsa-miR-34a-5p	gene-gene-pos	+validated miRTarBase	1	14697198|19461653|20144220|23327670	false	gene-gene-pos	14697198|19461653|20144220|23327670	+validated miRTarBase	28514	DLL1	MIMAT0000255	hsa-miR-34a-5p	28514 (validated miRTarBase) MIMAT0000255		1
validated miRTarBase	5030	1480	22407299|23069713|23786162|24816813	1956	hsa-miR-133a-3p	gene-gene-pos	+validated miRTarBase	1	22407299|23069713|23786162|24816813	false	gene-gene-pos	22407299|23069713|23786162|24816813	+validated miRTarBase	1956	EGFR	MIMAT0000427	hsa-miR-133a	1956 (validated miRTarBase) MIMAT0000427		1
validated miRTarBase	5072	1480	22079638	2044	hsa-miR-34a-5p	gene-gene-pos	+validated miRTarBase	1	22079638	false	gene-gene-pos	22079638	+validated miRTarBase	2044	EPHA5	MIMAT0000255	hsa-miR-34a-5p	2044 (validated miRTarBase) MIMAT0000255		1
validated miRTarBase	5114	1480	23174883	2261	hsa-miR-425-5p	gene-gene-pos	+validated miRTarBase	1	23174883	false	gene-gene-pos	23174883	+validated miRTarBase	2261	FGFR3	MIMAT0003393	hsa-miR-425-5p	2261 (validated miRTarBase) MIMAT0003393		1
validated miRTarBase	6548	1480	22198213|23001043	8061	hsa-miR-34a-5p	gene-gene-pos	+validated miRTarBase	1	22198213|23001043	false	gene-gene-pos	22198213|23001043	+validated miRTarBase	8061	FOSL1	MIMAT0000255	hsa-miR-34a-5p	8061 (validated miRTarBase) MIMAT0000255		1
validated miRTarBase	5165	1480	24999187	2305	hsa-miR-24-1-5p	gene-gene-pos	+validated miRTarBase	1	24999187	false	gene-gene-pos	24999187	+validated miRTarBase	2305	FOXM1	MIMAT0000079	hsa-miR-24-1-5p	2305 (validated miRTarBase) MIMAT0000079		1
validated miRTarBase	5447	1480	20598588|21460242	27086	hsa-miR-34a-5p	gene-gene-pos	+validated miRTarBase	1	20598588|21460242	false	gene-gene-pos	20598588|21460242	+validated miRTarBase	27086	FOXP1	MIMAT0000255	hsa-miR-34a-5p	27086 (validated miRTarBase) MIMAT0000255		1
validated miRTarBase	6365	1480	20160723|20198616|21351259|22292984	6624	hsa-miR-133a-3p	gene-gene-pos	+validated miRTarBase	1	20160723|20198616|21351259|22292984	false	gene-gene-pos	20160723|20198616|21351259|22292984	+validated miRTarBase	6624	FSCN1	MIMAT0000427	hsa-miR-133a	6624 (validated miRTarBase) MIMAT0000427		1
validated miRTarBase	5333	1480	24130780	2530	hsa-miR-34a-5p	gene-gene-pos	+validated miRTarBase	1	24130780	false	gene-gene-pos	24130780	+validated miRTarBase	2530	FUT8	MIMAT0000255	hsa-miR-34a-5p	2530 (validated miRTarBase) MIMAT0000255		1
validated miRTarBase	6029	1480	24482044	51809	hsa-miR-34a-5p	gene-gene-pos	+validated miRTarBase	1	24482044	false	gene-gene-pos	24482044	+validated miRTarBase	51809	GALNT7	MIMAT0000255	hsa-miR-34a-5p	51809 (validated miRTarBase) MIMAT0000255		1
validated miRTarBase	5543	1480	21396852	2950	hsa-miR-133a-3p	gene-gene-pos	+validated miRTarBase	1	21396852	false	gene-gene-pos	21396852	+validated miRTarBase	2950	GSTP1	MIMAT0000427	hsa-miR-133a	2950 (validated miRTarBase) MIMAT0000427		1
validated miRTarBase	6272	1480	18458081|19136465	610	hsa-miR-133a-3p	gene-gene-pos	+validated miRTarBase	1	18458081|19136465	false	gene-gene-pos	18458081|19136465	+validated miRTarBase	610	HCN2	MIMAT0000427	hsa-miR-133a	610 (validated miRTarBase) MIMAT0000427		1
validated miRTarBase	4396	1480	18458081	10021	hsa-miR-133a-3p	gene-gene-pos	+validated miRTarBase	1	18458081	false	gene-gene-pos	18458081	+validated miRTarBase	10021	HCN4	MIMAT0000427	hsa-miR-133a	10021 (validated miRTarBase) MIMAT0000427		1
validated miRTarBase	5633	1480	21566225|23836017	3065	hsa-miR-34a-5p	gene-gene-pos	+validated miRTarBase	1	21566225|23836017	false	gene-gene-pos	21566225|23836017	+validated miRTarBase	3065	HDAC1	MIMAT0000255	hsa-miR-34a-5p	3065 (validated miRTarBase) MIMAT0000255		1
validated miRTarBase	5654	1480	20018894|22232426|23298640	3172	hsa-miR-34a-5p	gene-gene-pos	+validated miRTarBase	1	20018894|22232426|23298640	false	gene-gene-pos	20018894|22232426|23298640	+validated miRTarBase	3172	HNF4A	MIMAT0000255	hsa-miR-34a-5p	3172 (validated miRTarBase) MIMAT0000255		1
validated miRTarBase	4381	1480	23936419	100124700	hsa-miR-34a-5p	gene-gene-pos	+validated miRTarBase	1	23936419	false	gene-gene-pos	23936419	+validated miRTarBase	100124700	HOTAIR	MIMAT0000255	hsa-miR-34a-5p	100124700 (validated miRTarBase) MIMAT0000255		1
validated miRTarBase	5714	1480	20130213	3456	hsa-miR-34a-5p	gene-gene-pos	+validated miRTarBase	1	20130213	false	gene-gene-pos	20130213	+validated miRTarBase	3456	IFNB1	MIMAT0000255	hsa-miR-34a-5p	3456 (validated miRTarBase) MIMAT0000255		1
validated miRTarBase	5720	9103.23	24127040|25780292	3480	hsa-miR-133a-3p	gene-gene-pos	+validated miRTarBase	1	24127040|25780292	false	gene-gene-pos	24127040|25780292	+validated miRTarBase	3480	IGF1R	MIMAT0000427	hsa-miR-133a	3480 (validated miRTarBase) MIMAT0000427		1
validated miRTarBase	5735	1480	24642471	3570	hsa-miR-34a-5p	gene-gene-pos	+validated miRTarBase	1	24642471	false	gene-gene-pos	24642471	+validated miRTarBase	3570	IL6R	MIMAT0000255	hsa-miR-34a-5p	3570 (validated miRTarBase) MIMAT0000255		1
validated miRTarBase	5741	1480	22301190	3612	hsa-miR-34a-5p	gene-gene-pos	+validated miRTarBase	1	22301190	false	gene-gene-pos	22301190	+validated miRTarBase	3612	IMPA1	MIMAT0000255	hsa-miR-34a-5p	3612 (validated miRTarBase) MIMAT0000255		1
validated miRTarBase	5747	1480	22301190	3615	hsa-miR-34a-5p	gene-gene-pos	+validated miRTarBase	1	22301190	false	gene-gene-pos	22301190	+validated miRTarBase	3615	IMPDH2	MIMAT0000255	hsa-miR-34a-5p	3615 (validated miRTarBase) MIMAT0000255		1
validated miRTarBase	5753	1480	24446339	3625	hsa-miR-34a-5p	gene-gene-pos	+validated miRTarBase	1	24446339	false	gene-gene-pos	24446339	+validated miRTarBase	3625	INHBB	MIMAT0000255	hsa-miR-34a-5p	3625 (validated miRTarBase) MIMAT0000255		1
validated miRTarBase	4997	1480	19398721|20351093|24307639	182	hsa-miR-34a-5p	gene-gene-pos	+validated miRTarBase	1	19398721|20351093|24307639	false	gene-gene-pos	19398721|20351093|24307639	+validated miRTarBase	182	JAG1	MIMAT0000255	hsa-miR-34a-5p	182 (validated miRTarBase) MIMAT0000255		1
validated miRTarBase	5783	1480	23569431	3756	hsa-miR-34a-5p	gene-gene-pos	+validated miRTarBase	1	23569431	false	gene-gene-pos	23569431	+validated miRTarBase	3756	KCNH1	MIMAT0000255	hsa-miR-34a-5p	3756 (validated miRTarBase) MIMAT0000255		1
validated miRTarBase	5786	1480	17344217	3757	hsa-miR-133a-3p	gene-gene-pos	+validated miRTarBase	1	17344217	false	gene-gene-pos	17344217	+validated miRTarBase	3757	KCNH2	MIMAT0000427	hsa-miR-133a	3757 (validated miRTarBase) MIMAT0000427		1
validated miRTarBase	5792	1480	17443681	3784	hsa-miR-133a-3p	gene-gene-pos	+validated miRTarBase	1	17443681	false	gene-gene-pos	17443681	+validated miRTarBase	3784	KCNQ1	MIMAT0000427	hsa-miR-133a	3784 (validated miRTarBase) MIMAT0000427		1
validated miRTarBase	6761	1480	24802408	9682	hsa-miR-34a-5p	gene-gene-pos	+validated miRTarBase	1	24802408	false	gene-gene-pos	24802408	+validated miRTarBase	9682	KDM4A	MIMAT0000255	hsa-miR-34a-5p	9682 (validated miRTarBase) MIMAT0000255		1
validated miRTarBase	5804	1480	24009080	3815	hsa-miR-34a-5p	gene-gene-pos	+validated miRTarBase	1	24009080	false	gene-gene-pos	24009080	+validated miRTarBase	3815	KIT	MIMAT0000255	hsa-miR-34a-5p	3815 (validated miRTarBase) MIMAT0000255		1
validated miRTarBase	4892	1480	22988100	152831	hsa-miR-34a-5p	gene-gene-pos	+validated miRTarBase	1	22988100	false	gene-gene-pos	22988100	+validated miRTarBase	152831	KLB	MIMAT0000255	hsa-miR-34a-5p	152831 (validated miRTarBase) MIMAT0000255		1
validated miRTarBase	6734	1480	24415058	9314	hsa-miR-34a-5p	gene-gene-pos	+validated miRTarBase	1	24415058	false	gene-gene-pos	24415058	+validated miRTarBase	9314	KLF4	MIMAT0000255	hsa-miR-34a-5p	9314 (validated miRTarBase) MIMAT0000255		1
validated miRTarBase	5834	1480	24497324	3897	hsa-miR-34a-5p	gene-gene-pos	+validated miRTarBase	1	24497324	false	gene-gene-pos	24497324	+validated miRTarBase	3897	L1CAM	MIMAT0000255	hsa-miR-34a-5p	3897 (validated miRTarBase) MIMAT0000255		1
validated miRTarBase	5843	1480	20843712|23968734	3927	hsa-miR-133a-3p	gene-gene-pos	+validated miRTarBase	1	20843712|23968734	false	gene-gene-pos	20843712|23968734	+validated miRTarBase	3927	LASP1	MIMAT0000427	hsa-miR-133a	3927 (validated miRTarBase) MIMAT0000427		1
validated miRTarBase	5849	9303.39	21566225	3939	hsa-miR-34a-5p	gene-gene-pos	+validated miRTarBase	1	21566225	false	gene-gene-pos	21566225	+validated miRTarBase	3939	LDHA	MIMAT0000255	hsa-miR-34a-5p	3939 (validated miRTarBase) MIMAT0000255		1
validated miRTarBase	5990	1480	21566225	51176	hsa-miR-34a-5p	gene-gene-pos	+validated miRTarBase	1	21566225	false	gene-gene-pos	21566225	+validated miRTarBase	51176	LEF1	MIMAT0000255	hsa-miR-34a-5p	51176 (validated miRTarBase) MIMAT0000255		1
validated miRTarBase	6800	1480	23174883	9935	hsa-miR-425-5p	gene-gene-pos	+validated miRTarBase	1	23174883	false	gene-gene-pos	23174883	+validated miRTarBase	9935	MAFB	MIMAT0003393	hsa-miR-425-5p	9935 (validated miRTarBase) MIMAT0003393		1
validated miRTarBase	5882	1480	21177782	4111	hsa-miR-34a-5p	gene-gene-pos	+validated miRTarBase	1	21177782	false	gene-gene-pos	21177782	+validated miRTarBase	4111	MAGEA12	MIMAT0000255	hsa-miR-34a-5p	4111 (validated miRTarBase) MIMAT0000255		1
validated miRTarBase	5873	1480	21177782	4101	hsa-miR-34a-5p	gene-gene-pos	+validated miRTarBase	1	21177782	false	gene-gene-pos	21177782	+validated miRTarBase	4101	MAGEA2	MIMAT0000255	hsa-miR-34a-5p	4101 (validated miRTarBase) MIMAT0000255		1
validated miRTarBase	5876	1480	21177782	4102	hsa-miR-34a-5p	gene-gene-pos	+validated miRTarBase	1	21177782	false	gene-gene-pos	21177782	+validated miRTarBase	4102	MAGEA3	MIMAT0000255	hsa-miR-34a-5p	4102 (validated miRTarBase) MIMAT0000255		1
validated miRTarBase	5879	1480	21177782	4105	hsa-miR-34a-5p	gene-gene-pos	+validated miRTarBase	1	21177782	false	gene-gene-pos	21177782	+validated miRTarBase	4105	MAGEA6	MIMAT0000255	hsa-miR-34a-5p	4105 (validated miRTarBase) MIMAT0000255		1
validated miRTarBase	6167	1480	20299489	5604	hsa-miR-34a-5p	gene-gene-pos	+validated miRTarBase	1	20299489	false	gene-gene-pos	20299489	+validated miRTarBase	5604	MAP2K1	MIMAT0000255	hsa-miR-34a-5p	5604 (validated miRTarBase) MIMAT0000255		1
validated miRTarBase	5888	1480	23756231	4170	hsa-miR-133a-3p	gene-gene-pos	+validated miRTarBase	1	23756231	false	gene-gene-pos	23756231	+validated miRTarBase	4170	MCL1	MIMAT0000427	hsa-miR-133a	4170 (validated miRTarBase) MIMAT0000427		1
validated miRTarBase	5915	1480	23783274	4323	hsa-miR-133a-3p	gene-gene-pos	+validated miRTarBase	1	23783274	false	gene-gene-pos	23783274	+validated miRTarBase	4323	MMP14	MIMAT0000427	hsa-miR-133a	4323 (validated miRTarBase) MIMAT0000427		1
validated miRTarBase	5921	1480	22266319	4478	hsa-miR-133a-3p	gene-gene-pos	+validated miRTarBase	1	22266319	false	gene-gene-pos	22266319	+validated miRTarBase	4478	MSN	MIMAT0000427	hsa-miR-133a	4478 (validated miRTarBase) MIMAT0000427		1
validated miRTarBase	6725	10147.7	22967897	92140	hsa-miR-136-5p	gene-gene-pos	+validated miRTarBase	1	22967897	false	gene-gene-pos	22967897	+validated miRTarBase	92140	MTDH	MIMAT0000448	hsa-miR-136-5p	92140 (validated miRTarBase) MIMAT0000448		1
validated miRTarBase	5324	1480	22299047|24668416	2475	hsa-miR-99b-5p	gene-gene-pos	+validated miRTarBase	1	22299047|24668416	false	gene-gene-pos	22299047|24668416	+validated miRTarBase	2475	MTOR	MIMAT0000689	hsa-miR-99b-5p	2475 (validated miRTarBase) MIMAT0000689		1
validated miRTarBase	4432	1480	23834033	10135	hsa-miR-34a-5p	gene-gene-pos	+validated miRTarBase	1	23834033	false	gene-gene-pos	23834033	+validated miRTarBase	10135	NAMPT	MIMAT0000255	hsa-miR-34a-5p	10135 (validated miRTarBase) MIMAT0000255		1
validated miRTarBase	6521	1480	22020437	79923	hsa-miR-34a-5p	gene-gene-pos	+validated miRTarBase	1	22020437	false	gene-gene-pos	22020437	+validated miRTarBase	79923	NANOG	MIMAT0000255	hsa-miR-34a-5p	79923 (validated miRTarBase) MIMAT0000255		1
validated miRTarBase	5951	1480	19773441|22363487	4853	hsa-miR-34a-5p	gene-gene-pos	+validated miRTarBase	1	19773441|22363487	false	gene-gene-pos	19773441|22363487	+validated miRTarBase	4853	NOTCH2	MIMAT0000255	hsa-miR-34a-5p	4853 (validated miRTarBase) MIMAT0000255		1
validated miRTarBase	5984	1480	24796666	5094	hsa-miR-34a-5p	gene-gene-pos	+validated miRTarBase	1	24796666	false	gene-gene-pos	24796666	+validated miRTarBase	5094	PCBP2	MIMAT0000255	hsa-miR-34a-5p	5094 (validated miRTarBase) MIMAT0000255		1
validated miRTarBase	6017	1480	22479456|23805317|24837198	5156	hsa-miR-34a-5p	gene-gene-pos	+validated miRTarBase	1	22479456|23805317|24837198	false	gene-gene-pos	22479456|23805317|24837198	+validated miRTarBase	5156	PDGFRA	MIMAT0000255	hsa-miR-34a-5p	5156 (validated miRTarBase) MIMAT0000255		1
validated miRTarBase	6020	1480	23805317|24837198	5159	hsa-miR-34a-5p	gene-gene-pos	+validated miRTarBase	1	23805317|24837198	false	gene-gene-pos	23805317|24837198	+validated miRTarBase	5159	PDGFRB	MIMAT0000255	hsa-miR-34a-5p	5159 (validated miRTarBase) MIMAT0000255		1
validated miRTarBase	4571	1480	23968734	10611	hsa-miR-133a-3p	gene-gene-pos	+validated miRTarBase	1	23968734	false	gene-gene-pos	23968734	+validated miRTarBase	10611	PDLIM5	MIMAT0000427	hsa-miR-133a	10611 (validated miRTarBase) MIMAT0000427		1
validated miRTarBase	5957	1480	21701775|22068816	4860	hsa-miR-133a-3p	gene-gene-pos	+validated miRTarBase	1	21701775|22068816	false	gene-gene-pos	21701775|22068816	+validated miRTarBase	4860	PNP	MIMAT0000427	hsa-miR-133a	4860 (validated miRTarBase) MIMAT0000427		1
validated miRTarBase	6074	1480	24457968	5460	hsa-miR-34a-5p	gene-gene-pos	+validated miRTarBase	1	24457968	false	gene-gene-pos	24457968	+validated miRTarBase	5460	POU5F1	MIMAT0000255	hsa-miR-34a-5p	5460 (validated miRTarBase) MIMAT0000255		1
validated miRTarBase	6101	1480	23426265	5514	hsa-miR-34a-5p	gene-gene-pos	+validated miRTarBase	1	23426265	false	gene-gene-pos	23426265	+validated miRTarBase	5514	PPP1R10	MIMAT0000255	hsa-miR-34a-5p	5514 (validated miRTarBase) MIMAT0000255		1
validated miRTarBase	6308	1480	23395168|23874225	63976	hsa-miR-133a-3p	gene-gene-pos	+validated miRTarBase	1	23395168|23874225	false	gene-gene-pos	23395168|23874225	+validated miRTarBase	63976	PRDM16	MIMAT0000427	hsa-miR-133a	63976 (validated miRTarBase) MIMAT0000427		1
validated miRTarBase	6200	1480	24571667	5728	hsa-miR-425-5p	gene-gene-pos	+validated miRTarBase	1	24571667	false	gene-gene-pos	24571667	+validated miRTarBase	5728	PTEN	MIMAT0003393	hsa-miR-425-5p	5728 (validated miRTarBase) MIMAT0003393		1
validated miRTarBase	6113	1480	17637574	55225	hsa-miR-99b-5p	gene-gene-pos	+validated miRTarBase	1	17637574	false	gene-gene-pos	17637574	+validated miRTarBase	55225	RAVER2	MIMAT0000689	hsa-miR-99b-5p	55225 (validated miRTarBase) MIMAT0000689		1
validated miRTarBase	4760	1480	23723074	117584	hsa-miR-133a-3p	gene-gene-pos	+validated miRTarBase	1	23723074	false	gene-gene-pos	23723074	+validated miRTarBase	117584	RFFL	MIMAT0000427	hsa-miR-133a	117584 (validated miRTarBase) MIMAT0000427		1
validated miRTarBase	5336	1480	24944883	253260	hsa-miR-34a-5p	gene-gene-pos	+validated miRTarBase	1	24944883	false	gene-gene-pos	24944883	+validated miRTarBase	253260	RICTOR	MIMAT0000255	hsa-miR-34a-5p	253260 (validated miRTarBase) MIMAT0000255		1
validated miRTarBase	4958	1480	24715690	166929	hsa-miR-133a-3p	gene-gene-pos	+validated miRTarBase	1	24715690	false	gene-gene-pos	24715690	+validated miRTarBase	166929	SGMS2	MIMAT0000427	hsa-miR-133a	166929 (validated miRTarBase) MIMAT0000427		1
validated miRTarBase	6011	1480	25860861	51547	hsa-miR-34a-5p	gene-gene-pos	+validated miRTarBase	1	25860861	false	gene-gene-pos	25860861	+validated miRTarBase	51547	SIRT7	MIMAT0000255	hsa-miR-34a-5p	51547 (validated miRTarBase) MIMAT0000255		1
validated miRTarBase	4742	1480	16224024	114798	hsa-miR-24-1-5p	gene-gene-pos	+validated miRTarBase	1	16224024	false	gene-gene-pos	16224024	+validated miRTarBase	114798	SLITRK1	MIMAT0000079	hsa-miR-24-1-5p	114798 (validated miRTarBase) MIMAT0000079		1
validated miRTarBase	6359	1480	22134354	6615	hsa-miR-34a-5p	gene-gene-pos	+validated miRTarBase	1	22134354	false	gene-gene-pos	22134354	+validated miRTarBase	6615	SNAI1	MIMAT0000255	hsa-miR-34a-5p	6615 (validated miRTarBase) MIMAT0000255		1
validated miRTarBase	5867	1480	24715690	401548	hsa-miR-133a-3p	gene-gene-pos	+validated miRTarBase	1	24715690	false	gene-gene-pos	24715690	+validated miRTarBase	401548	SNX30	MIMAT0000427	hsa-miR-133a	401548 (validated miRTarBase) MIMAT0000427		1
validated miRTarBase	6371	1480	22020437	6657	hsa-miR-34a-5p	gene-gene-pos	+validated miRTarBase	1	22020437	false	gene-gene-pos	22020437	+validated miRTarBase	6657	SOX2	MIMAT0000255	hsa-miR-34a-5p	6657 (validated miRTarBase) MIMAT0000255		1
validated miRTarBase	6377	9957.24	22911796|24613927	6667	hsa-miR-133a-3p	gene-gene-pos	+validated miRTarBase	1	22911796|24613927	false	gene-gene-pos	22911796|24613927	+validated miRTarBase	6667	SP1	MIMAT0000427	hsa-miR-133a	6667 (validated miRTarBase) MIMAT0000427		1
validated miRTarBase	6389	1480	23533633|23790975	6714	hsa-miR-34a-5p	gene-gene-pos	+validated miRTarBase	1	23533633|23790975	false	gene-gene-pos	23533633|23790975	+validated miRTarBase	6714	SRC	MIMAT0000255	hsa-miR-34a-5p	6714 (validated miRTarBase) MIMAT0000255		1
validated miRTarBase	6392	1480	22160687	6804	hsa-miR-34a-5p	gene-gene-pos	+validated miRTarBase	1	22160687	false	gene-gene-pos	22160687	+validated miRTarBase	6804	STX1A	MIMAT0000255	hsa-miR-34a-5p	6804 (validated miRTarBase) MIMAT0000255		1
validated miRTarBase	6404	1480	22160687	6857	hsa-miR-34a-5p	gene-gene-pos	+validated miRTarBase	1	22160687	false	gene-gene-pos	22160687	+validated miRTarBase	6857	SYT1	MIMAT0000255	hsa-miR-34a-5p	6857 (validated miRTarBase) MIMAT0000255		1
validated miRTarBase	4553	1480	23174883	10460	hsa-miR-425-5p	gene-gene-pos	+validated miRTarBase	1	23174883	false	gene-gene-pos	23174883	+validated miRTarBase	10460	TACC3	MIMAT0003393	hsa-miR-425-5p	10460 (validated miRTarBase) MIMAT0003393		1
validated miRTarBase	6419	1480	24849932	7068	hsa-miR-425-5p	gene-gene-pos	+validated miRTarBase	1	24849932	false	gene-gene-pos	24849932	+validated miRTarBase	7068	THRB	MIMAT0003393	hsa-miR-425-5p	7068 (validated miRTarBase) MIMAT0003393		1
validated miRTarBase	4414	9103.23	24715690	10054	hsa-miR-133a-3p	gene-gene-pos	+validated miRTarBase	1	24715690	false	gene-gene-pos	24715690	+validated miRTarBase	10054	UBA2	MIMAT0000427	hsa-miR-133a	10054 (validated miRTarBase) MIMAT0000427		1
validated miRTarBase	6443	1480	23988448	7351	hsa-miR-133a-3p	gene-gene-pos	+validated miRTarBase	1	23988448	false	gene-gene-pos	23988448	+validated miRTarBase	7351	UCP2	MIMAT0000427	hsa-miR-133a	7351 (validated miRTarBase) MIMAT0000427		1
validated miRTarBase	6545	1480	22102694	80328	hsa-miR-34a-5p	gene-gene-pos	+validated miRTarBase	1	22102694	false	gene-gene-pos	22102694	+validated miRTarBase	80328	ULBP2	MIMAT0000255	hsa-miR-34a-5p	80328 (validated miRTarBase) MIMAT0000255		1
validated miRTarBase	6401	1480	14697198	6844	hsa-miR-34a-5p	gene-gene-pos	+validated miRTarBase	1	14697198	false	gene-gene-pos	14697198	+validated miRTarBase	6844	VAMP2	MIMAT0000255	hsa-miR-34a-5p	6844 (validated miRTarBase) MIMAT0000255		1
validated miRTarBase	6488	1480	23154637	79001	hsa-miR-133a-3p	gene-gene-pos	+validated miRTarBase	1	23154637	false	gene-gene-pos	23154637	+validated miRTarBase	79001	VKORC1	MIMAT0000427	hsa-miR-133a	79001 (validated miRTarBase) MIMAT0000427		1
validated miRTarBase	6455	1480	19336450|19398721	7471	hsa-miR-34a-5p	gene-gene-pos	+validated miRTarBase	1	19336450|19398721	false	gene-gene-pos	19336450|19398721	+validated miRTarBase	7471	WNT1	MIMAT0000255	hsa-miR-34a-5p	7471 (validated miRTarBase) MIMAT0000255		1
validated miRTarBase	6464	1480	21182263|21566225|24970812	7528	hsa-miR-34a-5p	gene-gene-pos	+validated miRTarBase	1	21182263|21566225|24970812	false	gene-gene-pos	21182263|21566225|24970812	+validated miRTarBase	7528	YY1	MIMAT0000255	hsa-miR-34a-5p	7528 (validated miRTarBase) MIMAT0000255		1
validated miRTarBase	5945	1480	14697198|17150773|19461653|19773441|20351093|22363487|22438124|22684561|23035210|23085450|23226240|23430952	4851	hsa-miR-34a-5p	gene-gene-pos	+validated miRTarBase	0.979167	14697198|17150773|19461653|19773441|20351093|22363487|22438124|22684561|23035210|23085450|23226240|23430952	false	gene-gene-pos	14697198|17150773|19461653|19773441|20351093|22363487|22438124|22684561|23035210|23085450|23226240|23430952	+validated miRTarBase	4851	NOTCH1	MIMAT0000255	hsa-miR-34a-5p	4851 (validated miRTarBase) MIMAT0000255		0.979167
validated miRTarBase	5909	1480	18834857|19006648|19029026|19461653|19773441|20309880|21240262|22159222|22457788|23970470|24983493	4233	hsa-miR-34a-5p	gene-gene-pos	+validated miRTarBase	0.977273	18834857|19006648|19029026|19461653|19773441|20309880|21240262|22159222|22457788|23970470|24983493	false	gene-gene-pos	18834857|19006648|19029026|19461653|19773441|20309880|21240262|22159222|22457788|23970470|24983493	+validated miRTarBase	4233	MET	MIMAT0000255	hsa-miR-34a-5p	4233 (validated miRTarBase) MIMAT0000255		0.977273
validated miRTarBase	4517	1480	17914404|18406353|19461653|19584398|19773441|21240262|23035210|23592263	1021	hsa-miR-34a-5p	gene-gene-pos	+validated miRTarBase	0.96875	17914404|18406353|19461653|19584398|19773441|21240262|23035210|23592263	false	gene-gene-pos	17914404|18406353|19461653|19584398|19773441|21240262|23035210|23592263	+validated miRTarBase	1021	CDK6	MIMAT0000255	hsa-miR-34a-5p	1021 (validated miRTarBase) MIMAT0000255		0.96875
validated miRTarBase	6254	10743.4	17656095|17914404|18505919|18803879|19461653|19683563|20598588|21399894|21566225|23292172|23862748|24565525	596	hsa-miR-34a-5p	gene-gene-pos	+validated miRTarBase	0.958333	17656095|17914404|18505919|18803879|19461653|19683563|20598588|21399894|21566225|23292172|23862748|24565525	false	gene-gene-pos	17656095|17914404|18505919|18803879|19461653|19683563|20598588|21399894|21566225|23292172|23862748|24565525	+validated miRTarBase	596	BCL2	MIMAT0000255	hsa-miR-34a-5p	596 (validated miRTarBase) MIMAT0000255		0.958333
validated miRTarBase	6242	9303.39	18406353|19461653|20309880|20371350	595	hsa-miR-34a-5p	gene-gene-pos	+validated miRTarBase	0.9375	18406353|19461653|20309880|20371350	false	gene-gene-pos	18406353|19461653|20309880|20371350	+validated miRTarBase	595	CCND1	MIMAT0000255	hsa-miR-34a-5p	595 (validated miRTarBase) MIMAT0000255		0.9375
validated miRTarBase	6593	1480	2130430|21396852|21701775|21745735	8407	hsa-miR-133a-3p	gene-gene-pos	+validated miRTarBase	0.9375	2130430|21396852|21701775|21745735	false	gene-gene-pos	2130430|21396852|21701775|21745735	+validated miRTarBase	8407	TAGLN2	MIMAT0000427	hsa-miR-133a	8407 (validated miRTarBase) MIMAT0000427		0.9375
validated miRTarBase	6710	1480	17914404|19461653|23446348	9134	hsa-miR-34a-5p	gene-gene-pos	+validated miRTarBase	0.916667	17914404|19461653|23446348	false	gene-gene-pos	17914404|19461653|23446348	+validated miRTarBase	9134	CCNE2	MIMAT0000255	hsa-miR-34a-5p	9134 (validated miRTarBase) MIMAT0000255		0.916667
validated miRTarBase	5015	9303.39	17252019|17297439|17875987|17914404|19461653|20371350|20889924|23298779|23954321	1871	hsa-miR-34a-5p	gene-gene-pos	+validated miRTarBase	0.916667	17252019|17297439|17875987|17914404|19461653|20371350|20889924|23298779|23954321	false	gene-gene-pos	17252019|17297439|17875987|17914404|19461653|20371350|20889924|23298779|23954321	+validated miRTarBase	1871	E2F3	MIMAT0000255	hsa-miR-34a-5p	1871 (validated miRTarBase) MIMAT0000255		0.916667
validated miRTarBase	5933	1480	19696787|20371350|21294122|21297663|22159222|24510096	4609	hsa-miR-34a-5p	gene-gene-pos	+validated miRTarBase	0.916667	19696787|20371350|21294122|21297663|22159222|24510096	false	gene-gene-pos	19696787|20371350|21294122|21297663|22159222|24510096	+validated miRTarBase	4609	MYC	MIMAT0000255	hsa-miR-34a-5p	4609 (validated miRTarBase) MIMAT0000255		0.916667
validated miRTarBase	5936	1480	17297439|18504438|18505919|19461653|22020437|22662276	4613	hsa-miR-34a-5p	gene-gene-pos	+validated miRTarBase	0.916667	17297439|18504438|18505919|19461653|22020437|22662276	false	gene-gene-pos	17297439|18504438|18505919|19461653|22020437|22662276	+validated miRTarBase	4613	MYCN	MIMAT0000255	hsa-miR-34a-5p	4613 (validated miRTarBase) MIMAT0000255		0.916667
validated miRTarBase	5261	1480	18755897|18834855|19221490|19461653|20185821|20470934|20627091|21297663|21909380|23292172|23954321|24504520	23411	hsa-miR-34a-5p	gene-gene-pos	+validated miRTarBase	0.916667	18755897|18834855|19221490|19461653|20185821|20470934|20627091|21297663|21909380|23292172|23954321|24504520	false	gene-gene-pos	18755897|18834855|19221490|19461653|20185821|20470934|20627091|21297663|21909380|23292172|23954321|24504520	+validated miRTarBase	23411	SIRT1	MIMAT0000255	hsa-miR-34a-5p	23411 (validated miRTarBase) MIMAT0000255		0.916667
validated miRTarBase	4450	1480	17914404|19461653|21128241|21240262|24504520	1019	hsa-miR-34a-5p	gene-gene-pos	+validated miRTarBase	0.9	17914404|19461653|21128241|21240262|24504520	false	gene-gene-pos	17914404|19461653|21128241|21240262|24504520	+validated miRTarBase	1019	CDK4	MIMAT0000255	hsa-miR-34a-5p	1019 (validated miRTarBase) MIMAT0000255		0.9
validated miRTarBase	4423	1480	21396852|22378351	10092	hsa-miR-133a-3p	gene-gene-pos	+validated miRTarBase	0.875	21396852|22378351	false	gene-gene-pos	21396852|22378351	+validated miRTarBase	10092	ARPC5	MIMAT0000427	hsa-miR-133a	10092 (validated miRTarBase) MIMAT0000427		0.875
validated miRTarBase	6302	1480	22975373|23592263	6367	hsa-miR-34a-5p	gene-gene-pos	+validated miRTarBase	0.875	22975373|23592263	false	gene-gene-pos	22975373|23592263	+validated miRTarBase	6367	CCL22	MIMAT0000255	hsa-miR-34a-5p	6367 (validated miRTarBase) MIMAT0000255		0.875
validated miRTarBase	6248	8565.12	20371350|23174883	595	hsa-miR-425-5p	gene-gene-pos	+validated miRTarBase	0.875	20371350|23174883	false	gene-gene-pos	20371350|23174883	+validated miRTarBase	595	CCND1	MIMAT0003393	hsa-miR-425-5p	595 (validated miRTarBase) MIMAT0003393		0.875
validated miRTarBase	5327	1480	21396852|23969999	2512	hsa-miR-133a-3p	gene-gene-pos	+validated miRTarBase	0.875	21396852|23969999	false	gene-gene-pos	21396852|23969999	+validated miRTarBase	2512	FTL	MIMAT0000427	hsa-miR-133a	2512 (validated miRTarBase) MIMAT0000427		0.875
validated miRTarBase	5537	1480	20388499|21566225	2917	hsa-miR-34a-5p	gene-gene-pos	+validated miRTarBase	0.875	20388499|21566225	false	gene-gene-pos	20388499|21566225	+validated miRTarBase	2917	GRM7	MIMAT0000255	hsa-miR-34a-5p	2917 (validated miRTarBase) MIMAT0000255		0.875
validated miRTarBase	5900	1480	19461653|22870278|23592263|24532687	4194	hsa-miR-34a-5p	gene-gene-pos	+validated miRTarBase	0.875	19461653|22870278|23592263|24532687	false	gene-gene-pos	19461653|22870278|23592263|24532687	+validated miRTarBase	4194	MDM4	MIMAT0000255	hsa-miR-34a-5p	4194 (validated miRTarBase) MIMAT0000255		0.875
validated miRTarBase	6728	1480	20018894|21566225	9219	hsa-miR-34a-5p	gene-gene-pos	+validated miRTarBase	0.875	20018894|21566225	false	gene-gene-pos	20018894|21566225	+validated miRTarBase	9219	MTA2	MIMAT0000255	hsa-miR-34a-5p	9219 (validated miRTarBase) MIMAT0000255		0.875
validated miRTarBase	6467	1480	21205967|21566225	7535	hsa-miR-34a-5p	gene-gene-pos	+validated miRTarBase	0.875	21205967|21566225	false	gene-gene-pos	21205967|21566225	+validated miRTarBase	7535	ZAP70	MIMAT0000255	hsa-miR-34a-5p	7535 (validated miRTarBase) MIMAT0000255		0.875
validated miRTarBase	5927	1480	19584398|21566225|24504520	4602	hsa-miR-34a-5p	gene-gene-pos	+validated miRTarBase	0.833333	19584398|21566225|24504520	false	gene-gene-pos	19584398|21566225|24504520	+validated miRTarBase	4602	MYB	MIMAT0000255	hsa-miR-34a-5p	4602 (validated miRTarBase) MIMAT0000255		0.833333
validated miRTarBase	5426	1480	20371350|21572407|23446348|24220341	2619	hsa-miR-34a-5p	gene-gene-pos	+validated miRTarBase	0.8125	20371350|21572407|23446348|24220341	false	gene-gene-pos	20371350|21572407|23446348|24220341	+validated miRTarBase	2619	GAS1	MIMAT0000255	hsa-miR-34a-5p	2619 (validated miRTarBase) MIMAT0000255		0.8125
validated miRTarBase	4384	1480	21396852	100128295	hsa-miR-133a-3p	gene-gene-pos	+validated miRTarBase	0.75	21396852	false	gene-gene-pos	21396852	+validated miRTarBase	100128295	100128295	MIMAT0000427	hsa-miR-133a	100128295 (validated miRTarBase) MIMAT0000427		0.75
validated miRTarBase	5159	1480	21566225	23044	hsa-miR-34a-5p	gene-gene-pos	+validated miRTarBase	0.75	21566225	false	gene-gene-pos	21566225	+validated miRTarBase	23044	23044	MIMAT0000255	hsa-miR-34a-5p	23044 (validated miRTarBase) MIMAT0000255		0.75
validated miRTarBase	5369	1480	21566225	25765	hsa-miR-34a-5p	gene-gene-pos	+validated miRTarBase	0.75	21566225	false	gene-gene-pos	21566225	+validated miRTarBase	25765	25765	MIMAT0000255	hsa-miR-34a-5p	25765 (validated miRTarBase) MIMAT0000255		0.75
validated miRTarBase	6122	1480	24145033	554045	hsa-miR-133a-3p	gene-gene-pos	+validated miRTarBase	0.75	24145033	false	gene-gene-pos	24145033	+validated miRTarBase	554045	554045	MIMAT0000427	hsa-miR-133a	554045 (validated miRTarBase) MIMAT0000427		0.75
validated miRTarBase	6323	1480	23824327	645840	hsa-miR-133a-3p	gene-gene-pos	+validated miRTarBase	0.75	23824327	false	gene-gene-pos	23824327	+validated miRTarBase	645840	645840	MIMAT0000427	hsa-miR-133a	645840 (validated miRTarBase) MIMAT0000427		0.75
validated miRTarBase	6395	1480	24374217	6833	hsa-miR-136-5p	gene-gene-pos	+validated miRTarBase	0.75	24374217	false	gene-gene-pos	24374217	+validated miRTarBase	6833	ABCC8	MIMAT0000448	hsa-miR-136-5p	6833 (validated miRTarBase) MIMAT0000448		0.75
validated miRTarBase	6119	1480	23824327	55347	hsa-miR-136-5p	gene-gene-pos	+validated miRTarBase	0.75	23824327	false	gene-gene-pos	23824327	+validated miRTarBase	55347	ABHD10	MIMAT0000448	hsa-miR-136-5p	55347 (validated miRTarBase) MIMAT0000448		0.75
validated miRTarBase	6533	1480	23313552	80167	hsa-miR-133a-3p	gene-gene-pos	+validated miRTarBase	0.75	23313552	false	gene-gene-pos	23313552	+validated miRTarBase	80167	ABHD18	MIMAT0000427	hsa-miR-133a	80167 (validated miRTarBase) MIMAT0000427		0.75
validated miRTarBase	4441	37180	24374217	10152	hsa-miR-136-5p	gene-gene-pos	+validated miRTarBase	0.75	24374217	false	gene-gene-pos	24374217	+validated miRTarBase	10152	ABI2	MIMAT0000448	hsa-miR-136-5p	10152 (validated miRTarBase) MIMAT0000448		0.75
validated miRTarBase	4438	35800	19536157	10152	hsa-miR-24-1-5p	gene-gene-pos	+validated miRTarBase	0.75	19536157	false	gene-gene-pos	19536157	+validated miRTarBase	10152	ABI2	MIMAT0000079	hsa-miR-24-1-5p	10152 (validated miRTarBase) MIMAT0000079		0.75
validated miRTarBase	5861	1480	22815788	3983	hsa-miR-34a-5p	gene-gene-pos	+validated miRTarBase	0.75	22815788	false	gene-gene-pos	22815788	+validated miRTarBase	3983	ABLIM1	MIMAT0000255	hsa-miR-34a-5p	3983 (validated miRTarBase) MIMAT0000255		0.75
validated miRTarBase	5675	1480	23824327	32	hsa-miR-425-5p	gene-gene-pos	+validated miRTarBase	0.75	23824327	false	gene-gene-pos	23824327	+validated miRTarBase	32	ACACB	MIMAT0003393	hsa-miR-425-5p	32 (validated miRTarBase) MIMAT0003393		0.75
validated miRTarBase	5297	1480	22012620	23597	hsa-miR-136-5p	gene-gene-pos	+validated miRTarBase	0.75	22012620	false	gene-gene-pos	22012620	+validated miRTarBase	23597	ACOT9	MIMAT0000448	hsa-miR-136-5p	23597 (validated miRTarBase) MIMAT0000448		0.75
validated miRTarBase	5228	1480	21566225	23305	hsa-miR-34a-5p	gene-gene-pos	+validated miRTarBase	0.75	21566225	false	gene-gene-pos	21566225	+validated miRTarBase	23305	ACSL6	MIMAT0000255	hsa-miR-34a-5p	23305 (validated miRTarBase) MIMAT0000255		0.75
validated miRTarBase	6431	8404.05	23622248	71	hsa-miR-34a-5p	gene-gene-pos	+validated miRTarBase	0.75	23622248	false	gene-gene-pos	23622248	+validated miRTarBase	71	ACTG1	MIMAT0000255	hsa-miR-34a-5p	71 (validated miRTarBase) MIMAT0000255		0.75
validated miRTarBase	6434	7216.48	23622248	71	hsa-miR-99b-5p	gene-gene-pos	+validated miRTarBase	0.75	23622248	false	gene-gene-pos	23622248	+validated miRTarBase	71	ACTG1	MIMAT0000689	hsa-miR-99b-5p	71 (validated miRTarBase) MIMAT0000689		0.75
validated miRTarBase	4426	1480	23622248	10120	hsa-miR-99b-5p	gene-gene-pos	+validated miRTarBase	0.75	23622248	false	gene-gene-pos	23622248	+validated miRTarBase	10120	ACTR1B	MIMAT0000689	hsa-miR-99b-5p	10120 (validated miRTarBase) MIMAT0000689		0.75
validated miRTarBase	4559	1480	21566225	104	hsa-miR-34a-5p	gene-gene-pos	+validated miRTarBase	0.75	21566225	false	gene-gene-pos	21566225	+validated miRTarBase	104	ADARB1	MIMAT0000255	hsa-miR-34a-5p	104 (validated miRTarBase) MIMAT0000255		0.75
validated miRTarBase	4763	1480	23824327	117	hsa-miR-136-5p	gene-gene-pos	+validated miRTarBase	0.75	23824327	false	gene-gene-pos	23824327	+validated miRTarBase	117	ADCYAP1R1	MIMAT0000448	hsa-miR-136-5p	117 (validated miRTarBase) MIMAT0000448		0.75
validated miRTarBase	5249	1480	21566225	23394	hsa-miR-34a-5p	gene-gene-pos	+validated miRTarBase	0.75	21566225	false	gene-gene-pos	21566225	+validated miRTarBase	23394	ADNP	MIMAT0000255	hsa-miR-34a-5p	23394 (validated miRTarBase) MIMAT0000255		0.75
validated miRTarBase	5450	1480	21572407|23592263	27125	hsa-miR-425-5p	gene-gene-pos	+validated miRTarBase	0.75	21572407|23592263	false	gene-gene-pos	21572407|23592263	+validated miRTarBase	27125	AFF4	MIMAT0003393	hsa-miR-425-5p	27125 (validated miRTarBase) MIMAT0003393		0.75
validated miRTarBase	5438	1480	23622248	26523	hsa-miR-34a-5p	gene-gene-pos	+validated miRTarBase	0.75	23622248	false	gene-gene-pos	23622248	+validated miRTarBase	26523	AGO1	MIMAT0000255	hsa-miR-34a-5p	26523 (validated miRTarBase) MIMAT0000255		0.75
validated miRTarBase	4565	1480	23622248	10598	hsa-miR-99b-5p	gene-gene-pos	+validated miRTarBase	0.75	23622248	false	gene-gene-pos	23622248	+validated miRTarBase	10598	AHSA1	MIMAT0000689	hsa-miR-99b-5p	10598 (validated miRTarBase) MIMAT0000689		0.75
validated miRTarBase	4538	1480	21566225	10327	hsa-miR-34a-5p	gene-gene-pos	+validated miRTarBase	0.75	21566225	false	gene-gene-pos	21566225	+validated miRTarBase	10327	AKR1A1	MIMAT0000255	hsa-miR-34a-5p	10327 (validated miRTarBase) MIMAT0000255		0.75
validated miRTarBase	5201	1480	21566225	231	hsa-miR-34a-5p	gene-gene-pos	+validated miRTarBase	0.75	21566225	false	gene-gene-pos	21566225	+validated miRTarBase	231	AKR1B1	MIMAT0000255	hsa-miR-34a-5p	231 (validated miRTarBase) MIMAT0000255		0.75
validated miRTarBase	5321	1480	21566225	246181	hsa-miR-34a-5p	gene-gene-pos	+validated miRTarBase	0.75	21566225	false	gene-gene-pos	21566225	+validated miRTarBase	246181	AKR7L	MIMAT0000255	hsa-miR-34a-5p	246181 (validated miRTarBase) MIMAT0000255		0.75
validated miRTarBase	5093	1480	23622248	219	hsa-miR-99b-5p	gene-gene-pos	+validated miRTarBase	0.75	23622248	false	gene-gene-pos	23622248	+validated miRTarBase	219	ALDH1B1	MIMAT0000689	hsa-miR-99b-5p	219 (validated miRTarBase) MIMAT0000689		0.75
validated miRTarBase	5111	1480	21566225	223	hsa-miR-34a-5p	gene-gene-pos	+validated miRTarBase	0.75	21566225	false	gene-gene-pos	21566225	+validated miRTarBase	223	ALDH9A1	MIMAT0000255	hsa-miR-34a-5p	223 (validated miRTarBase) MIMAT0000255		0.75
validated miRTarBase	5177	1480	23824327	230	hsa-miR-133a-3p	gene-gene-pos	+validated miRTarBase	0.75	23824327	false	gene-gene-pos	23824327	+validated miRTarBase	230	ALDOC	MIMAT0000427	hsa-miR-133a	230 (validated miRTarBase) MIMAT0000427		0.75
validated miRTarBase	6002	1480	19536157	51378	hsa-miR-133a-3p	gene-gene-pos	+validated miRTarBase	0.75	19536157	false	gene-gene-pos	19536157	+validated miRTarBase	51378	ANGPT4	MIMAT0000427	hsa-miR-133a	51378 (validated miRTarBase) MIMAT0000427		0.75
validated miRTarBase	5639	1480	21566225	307	hsa-miR-34a-5p	gene-gene-pos	+validated miRTarBase	0.75	21566225	false	gene-gene-pos	21566225	+validated miRTarBase	307	ANXA4	MIMAT0000255	hsa-miR-34a-5p	307 (validated miRTarBase) MIMAT0000255		0.75
validated miRTarBase	4928	1480	21566225	160	hsa-miR-34a-5p	gene-gene-pos	+validated miRTarBase	0.75	21566225	false	gene-gene-pos	21566225	+validated miRTarBase	160	AP2A1	MIMAT0000255	hsa-miR-34a-5p	160 (validated miRTarBase) MIMAT0000255		0.75
validated miRTarBase	4934	1480	21566225	161	hsa-miR-34a-5p	gene-gene-pos	+validated miRTarBase	0.75	21566225	false	gene-gene-pos	21566225	+validated miRTarBase	161	AP2A2	MIMAT0000255	hsa-miR-34a-5p	161 (validated miRTarBase) MIMAT0000255		0.75
validated miRTarBase	4940	1480	21566225	163	hsa-miR-34a-5p	gene-gene-pos	+validated miRTarBase	0.75	21566225	false	gene-gene-pos	21566225	+validated miRTarBase	163	AP2B1	MIMAT0000255	hsa-miR-34a-5p	163 (validated miRTarBase) MIMAT0000255		0.75
validated miRTarBase	4757	1480	21566225	1173	hsa-miR-34a-5p	gene-gene-pos	+validated miRTarBase	0.75	21566225	false	gene-gene-pos	21566225	+validated miRTarBase	1173	AP2M1	MIMAT0000255	hsa-miR-34a-5p	1173 (validated miRTarBase) MIMAT0000255		0.75
validated miRTarBase	6692	1480	20371350	8943	hsa-miR-425-5p	gene-gene-pos	+validated miRTarBase	0.75	20371350	false	gene-gene-pos	20371350	+validated miRTarBase	8943	AP3D1	MIMAT0003393	hsa-miR-425-5p	8943 (validated miRTarBase) MIMAT0003393		0.75
validated miRTarBase	5672	1480	21566225	327	hsa-miR-34a-5p	gene-gene-pos	+validated miRTarBase	0.75	21566225	false	gene-gene-pos	21566225	+validated miRTarBase	327	APEH	MIMAT0000255	hsa-miR-34a-5p	327 (validated miRTarBase) MIMAT0000255		0.75
validated miRTarBase	5312	1480	21566225	23780	hsa-miR-34a-5p	gene-gene-pos	+validated miRTarBase	0.75	21566225	false	gene-gene-pos	21566225	+validated miRTarBase	23780	APOL2	MIMAT0000255	hsa-miR-34a-5p	23780 (validated miRTarBase) MIMAT0000255		0.75
validated miRTarBase	6560	1480	19536157	80830	hsa-miR-133a-3p	gene-gene-pos	+validated miRTarBase	0.75	19536157	false	gene-gene-pos	19536157	+validated miRTarBase	80830	APOL6	MIMAT0000427	hsa-miR-133a	80830 (validated miRTarBase) MIMAT0000427		0.75
validated miRTarBase	5777	1480	22815788	374	hsa-miR-34a-5p	gene-gene-pos	+validated miRTarBase	0.75	22815788	false	gene-gene-pos	22815788	+validated miRTarBase	374	AREG	MIMAT0000255	hsa-miR-34a-5p	374 (validated miRTarBase) MIMAT0000255		0.75
validated miRTarBase	5807	1480	21566225	382	hsa-miR-34a-5p	gene-gene-pos	+validated miRTarBase	0.75	21566225	false	gene-gene-pos	21566225	+validated miRTarBase	382	ARF6	MIMAT0000255	hsa-miR-34a-5p	382 (validated miRTarBase) MIMAT0000255		0.75
validated miRTarBase	5846	1480	20371350|21566225|21572407|23592263	392	hsa-miR-34a-5p	gene-gene-pos	+validated miRTarBase	0.75	20371350|21566225|21572407|23592263	false	gene-gene-pos	20371350|21566225|21572407|23592263	+validated miRTarBase	392	ARHGAP1	MIMAT0000255	hsa-miR-34a-5p	392 (validated miRTarBase) MIMAT0000255		0.75
validated miRTarBase	5375	1480	23622248	25820	hsa-miR-425-5p	gene-gene-pos	+validated miRTarBase	0.75	23622248	false	gene-gene-pos	23622248	+validated miRTarBase	25820	ARIH1	MIMAT0003393	hsa-miR-425-5p	25820 (validated miRTarBase) MIMAT0003393		0.75
validated miRTarBase	5204	1480	21396852	23204	hsa-miR-133a-3p	gene-gene-pos	+validated miRTarBase	0.75	21396852	false	gene-gene-pos	21396852	+validated miRTarBase	23204	ARL6IP1	MIMAT0000427	hsa-miR-133a	23204 (validated miRTarBase) MIMAT0000427		0.75
validated miRTarBase	5981	1480	24374217	50807	hsa-miR-136-5p	gene-gene-pos	+validated miRTarBase	0.75	24374217	false	gene-gene-pos	24374217	+validated miRTarBase	50807	ASAP1	MIMAT0000448	hsa-miR-136-5p	50807 (validated miRTarBase) MIMAT0000448		0.75
validated miRTarBase	4631	1480	23622248	10973	hsa-miR-425-5p	gene-gene-pos	+validated miRTarBase	0.75	23622248	false	gene-gene-pos	23622248	+validated miRTarBase	10973	ASCC3	MIMAT0003393	hsa-miR-425-5p	10973 (validated miRTarBase) MIMAT0003393		0.75
validated miRTarBase	6503	1480	21572407	79572	hsa-miR-133a-3p	gene-gene-pos	+validated miRTarBase	0.75	21572407	false	gene-gene-pos	21572407	+validated miRTarBase	79572	ATP13A3	MIMAT0000427	hsa-miR-133a	79572 (validated miRTarBase) MIMAT0000427		0.75
validated miRTarBase	6035	1480	20371350|21572407|22012620|22927820|23313552|23446348|23592263|24398324	518	hsa-miR-425-5p	gene-gene-pos	+validated miRTarBase	0.75	20371350|21572407|22012620|22927820|23313552|23446348|23592263|24398324	false	gene-gene-pos	20371350|21572407|22012620|22927820|23313552|23446348|23592263|24398324	+validated miRTarBase	518	ATP5MC3	MIMAT0003393	hsa-miR-425-5p	518 (validated miRTarBase) MIMAT0003393		0.75
validated miRTarBase	6623	1480	23622248	84833	hsa-miR-425-5p	gene-gene-pos	+validated miRTarBase	0.75	23622248	false	gene-gene-pos	23622248	+validated miRTarBase	84833	ATP5MK	MIMAT0003393	hsa-miR-425-5p	84833 (validated miRTarBase) MIMAT0003393		0.75
validated miRTarBase	6299	1480	23824327	6310	hsa-miR-136-5p	gene-gene-pos	+validated miRTarBase	0.75	23824327	false	gene-gene-pos	23824327	+validated miRTarBase	6310	ATXN1	MIMAT0000448	hsa-miR-136-5p	6310 (validated miRTarBase) MIMAT0000448		0.75
validated miRTarBase	5705	1480	23592263	342371	hsa-miR-34a-5p	gene-gene-pos	+validated miRTarBase	0.75	23592263	false	gene-gene-pos	23592263	+validated miRTarBase	342371	ATXN1L	MIMAT0000255	hsa-miR-34a-5p	342371 (validated miRTarBase) MIMAT0000255		0.75
validated miRTarBase	4718	1480	21566225	11273	hsa-miR-34a-5p	gene-gene-pos	+validated miRTarBase	0.75	21566225	false	gene-gene-pos	21566225	+validated miRTarBase	11273	ATXN2L	MIMAT0000255	hsa-miR-34a-5p	11273 (validated miRTarBase) MIMAT0000255		0.75
validated miRTarBase	4691	9303.39	23592263	11176	hsa-miR-34a-5p	gene-gene-pos	+validated miRTarBase	0.75	23592263	false	gene-gene-pos	23592263	+validated miRTarBase	11176	BAZ2A	MIMAT0000255	hsa-miR-34a-5p	11176 (validated miRTarBase) MIMAT0000255		0.75
validated miRTarBase	4694	8565.12	23622248	11176	hsa-miR-425-5p	gene-gene-pos	+validated miRTarBase	0.75	23622248	false	gene-gene-pos	23622248	+validated miRTarBase	11176	BAZ2A	MIMAT0003393	hsa-miR-425-5p	11176 (validated miRTarBase) MIMAT0003393		0.75
validated miRTarBase	6305	1480	21396852	63827	hsa-miR-133a-3p	gene-gene-pos	+validated miRTarBase	0.75	21396852	false	gene-gene-pos	21396852	+validated miRTarBase	63827	BCAN	MIMAT0000427	hsa-miR-133a	63827 (validated miRTarBase) MIMAT0000427		0.75
validated miRTarBase	5315	1480	20371350|23446348	23786	hsa-miR-34a-5p	gene-gene-pos	+validated miRTarBase	0.75	20371350|23446348	false	gene-gene-pos	20371350|23446348	+validated miRTarBase	23786	BCL2L13	MIMAT0000255	hsa-miR-34a-5p	23786 (validated miRTarBase) MIMAT0000255		0.75
validated miRTarBase	6263	1480	23592263	602	hsa-miR-133a-3p	gene-gene-pos	+validated miRTarBase	0.75	23592263	false	gene-gene-pos	23592263	+validated miRTarBase	602	BCL3	MIMAT0000427	hsa-miR-133a	602 (validated miRTarBase) MIMAT0000427		0.75
validated miRTarBase	6083	1480	20371350	54880	hsa-miR-425-5p	gene-gene-pos	+validated miRTarBase	0.75	20371350	false	gene-gene-pos	20371350	+validated miRTarBase	54880	BCOR	MIMAT0003393	hsa-miR-425-5p	54880 (validated miRTarBase) MIMAT0003393		0.75
validated miRTarBase	6173	1480	20371350	56271	hsa-miR-425-5p	gene-gene-pos	+validated miRTarBase	0.75	20371350	false	gene-gene-pos	20371350	+validated miRTarBase	56271	BEX4	MIMAT0003393	hsa-miR-425-5p	56271 (validated miRTarBase) MIMAT0003393		0.75
validated miRTarBase	6557	1480	20371350|21572407	80823	hsa-miR-425-5p	gene-gene-pos	+validated miRTarBase	0.75	20371350|21572407	false	gene-gene-pos	20371350|21572407	+validated miRTarBase	80823	BHLHB9	MIMAT0003393	hsa-miR-425-5p	80823 (validated miRTarBase) MIMAT0003393		0.75
validated miRTarBase	5684	1480	17540599	330	hsa-miR-34a-5p	gene-gene-pos	+validated miRTarBase	0.75	17540599	false	gene-gene-pos	17540599	+validated miRTarBase	330	BIRC3	MIMAT0000255	hsa-miR-34a-5p	330 (validated miRTarBase) MIMAT0000255		0.75
validated miRTarBase	5693	8565.12	20371350	332	hsa-miR-425-5p	gene-gene-pos	+validated miRTarBase	0.75	20371350	false	gene-gene-pos	20371350	+validated miRTarBase	332	BIRC5	MIMAT0003393	hsa-miR-425-5p	332 (validated miRTarBase) MIMAT0003393		0.75
validated miRTarBase	6485	1480	19536157|23824327	7809	hsa-miR-136-5p	gene-gene-pos	+validated miRTarBase	0.75	19536157|23824327	false	gene-gene-pos	19536157|23824327	+validated miRTarBase	7809	BSND	MIMAT0000448	hsa-miR-136-5p	7809 (validated miRTarBase) MIMAT0000448		0.75
validated miRTarBase	6716	10147.7	20371350	91408	hsa-miR-136-5p	gene-gene-pos	+validated miRTarBase	0.75	20371350	false	gene-gene-pos	20371350	+validated miRTarBase	91408	BTF3L4	MIMAT0000448	hsa-miR-136-5p	91408 (validated miRTarBase) MIMAT0000448		0.75
validated miRTarBase	6713	10743.4	21566225	91408	hsa-miR-34a-5p	gene-gene-pos	+validated miRTarBase	0.75	21566225	false	gene-gene-pos	21566225	+validated miRTarBase	91408	BTF3L4	MIMAT0000255	hsa-miR-34a-5p	91408 (validated miRTarBase) MIMAT0000255		0.75
validated miRTarBase	6764	1480	20371350|23446348	9689	hsa-miR-136-5p	gene-gene-pos	+validated miRTarBase	0.75	20371350|23446348	false	gene-gene-pos	20371350|23446348	+validated miRTarBase	9689	BZW1	MIMAT0000448	hsa-miR-136-5p	9689 (validated miRTarBase) MIMAT0000448		0.75
validated miRTarBase	6059	1480	20371350	53838	hsa-miR-133a-3p	gene-gene-pos	+validated miRTarBase	0.75	20371350	false	gene-gene-pos	20371350	+validated miRTarBase	53838	C11orf24	MIMAT0000427	hsa-miR-133a	53838 (validated miRTarBase) MIMAT0000427		0.75
validated miRTarBase	4790	1480	23824327	124773	hsa-miR-133a-3p	gene-gene-pos	+validated miRTarBase	0.75	23824327	false	gene-gene-pos	23824327	+validated miRTarBase	124773	C17orf64	MIMAT0000427	hsa-miR-133a	124773 (validated miRTarBase) MIMAT0000427		0.75
validated miRTarBase	5390	1480	23824327	25966	hsa-miR-136-5p	gene-gene-pos	+validated miRTarBase	0.75	23824327	false	gene-gene-pos	23824327	+validated miRTarBase	25966	C2CD2	MIMAT0000448	hsa-miR-136-5p	25966 (validated miRTarBase) MIMAT0000448		0.75
validated miRTarBase	6482	1480	24374217	776	hsa-miR-136-5p	gene-gene-pos	+validated miRTarBase	0.75	24374217	false	gene-gene-pos	24374217	+validated miRTarBase	776	CACNA1D	MIMAT0000448	hsa-miR-136-5p	776 (validated miRTarBase) MIMAT0000448		0.75
validated miRTarBase	6221	1480	23622248	57662	hsa-miR-99b-5p	gene-gene-pos	+validated miRTarBase	0.75	23622248	false	gene-gene-pos	23622248	+validated miRTarBase	57662	CAMSAP3	MIMAT0000689	hsa-miR-99b-5p	57662 (validated miRTarBase) MIMAT0000689		0.75
validated miRTarBase	5219	1480	20371350	23261	hsa-miR-34a-5p	gene-gene-pos	+validated miRTarBase	0.75	20371350	false	gene-gene-pos	20371350	+validated miRTarBase	23261	CAMTA1	MIMAT0000255	hsa-miR-34a-5p	23261 (validated miRTarBase) MIMAT0000255		0.75
validated miRTarBase	6155	1480	23622248	55832	hsa-miR-425-5p	gene-gene-pos	+validated miRTarBase	0.75	23622248	false	gene-gene-pos	23622248	+validated miRTarBase	55832	CAND1	MIMAT0003393	hsa-miR-425-5p	55832 (validated miRTarBase) MIMAT0003393		0.75
validated miRTarBase	6569	1480	24374217	830	hsa-miR-136-5p	gene-gene-pos	+validated miRTarBase	0.75	24374217	false	gene-gene-pos	24374217	+validated miRTarBase	830	CAPZA2	MIMAT0000448	hsa-miR-136-5p	830 (validated miRTarBase) MIMAT0000448		0.75
validated miRTarBase	4727	1480	21572407	11335	hsa-miR-34a-5p	gene-gene-pos	+validated miRTarBase	0.75	21572407	false	gene-gene-pos	21572407	+validated miRTarBase	11335	CBX3	MIMAT0000255	hsa-miR-34a-5p	11335 (validated miRTarBase) MIMAT0000255		0.75
validated miRTarBase	4886	1480	23824327	151278	hsa-miR-136-5p	gene-gene-pos	+validated miRTarBase	0.75	23824327	false	gene-gene-pos	23824327	+validated miRTarBase	151278	CCDC140	MIMAT0000448	hsa-miR-136-5p	151278 (validated miRTarBase) MIMAT0000448		0.75
validated miRTarBase	5699	1480	23622248	339184	hsa-miR-425-5p	gene-gene-pos	+validated miRTarBase	0.75	23622248	false	gene-gene-pos	23622248	+validated miRTarBase	339184	CCDC144NL	MIMAT0003393	hsa-miR-425-5p	339184 (validated miRTarBase) MIMAT0003393		0.75
validated miRTarBase	5708	1480	23824327	343099	hsa-miR-136-5p	gene-gene-pos	+validated miRTarBase	0.75	23824327	false	gene-gene-pos	23824327	+validated miRTarBase	343099	CCDC18	MIMAT0000448	hsa-miR-136-5p	343099 (validated miRTarBase) MIMAT0000448		0.75
validated miRTarBase	5702	1480	23824327	339829	hsa-miR-133a-3p	gene-gene-pos	+validated miRTarBase	0.75	23824327	false	gene-gene-pos	23824327	+validated miRTarBase	339829	CCDC39	MIMAT0000427	hsa-miR-133a	339829 (validated miRTarBase) MIMAT0000427		0.75
validated miRTarBase	4964	1480	19536157	168455	hsa-miR-136-5p	gene-gene-pos	+validated miRTarBase	0.75	19536157	false	gene-gene-pos	19536157	+validated miRTarBase	168455	CCDC71L	MIMAT0000448	hsa-miR-136-5p	168455 (validated miRTarBase) MIMAT0000448		0.75
validated miRTarBase	4634	1480	23824327	10983	hsa-miR-133a-3p	gene-gene-pos	+validated miRTarBase	0.75	23824327	false	gene-gene-pos	23824327	+validated miRTarBase	10983	CCNI	MIMAT0000427	hsa-miR-133a	10983 (validated miRTarBase) MIMAT0000427		0.75
validated miRTarBase	4925	1480	23824327	1604	hsa-miR-136-5p	gene-gene-pos	+validated miRTarBase	0.75	23824327	false	gene-gene-pos	23824327	+validated miRTarBase	1604	CD55	MIMAT0000448	hsa-miR-136-5p	1604 (validated miRTarBase) MIMAT0000448		0.75
validated miRTarBase	4871	1480	23622248	146059	hsa-miR-34a-5p	gene-gene-pos	+validated miRTarBase	0.75	23622248	false	gene-gene-pos	23622248	+validated miRTarBase	146059	CDAN1	MIMAT0000255	hsa-miR-34a-5p	146059 (validated miRTarBase) MIMAT0000255		0.75
validated miRTarBase	6812	1480	23592263	994	hsa-miR-425-5p	gene-gene-pos	+validated miRTarBase	0.75	23592263	false	gene-gene-pos	23592263	+validated miRTarBase	994	CDC25B	MIMAT0003393	hsa-miR-425-5p	994 (validated miRTarBase) MIMAT0003393		0.75
validated miRTarBase	6683	1480	21572407	8851	hsa-miR-133a-3p	gene-gene-pos	+validated miRTarBase	0.75	21572407	false	gene-gene-pos	21572407	+validated miRTarBase	8851	CDK5R1	MIMAT0000427	hsa-miR-133a	8851 (validated miRTarBase) MIMAT0000427		0.75
validated miRTarBase	4526	1480	22012620|23592263	1026	hsa-miR-133a-3p	gene-gene-pos	+validated miRTarBase	0.75	22012620|23592263	false	gene-gene-pos	22012620|23592263	+validated miRTarBase	1026	CDKN1A	MIMAT0000427	hsa-miR-133a	1026 (validated miRTarBase) MIMAT0000427		0.75
validated miRTarBase	4529	1480	23446348	1027	hsa-miR-34a-5p	gene-gene-pos	+validated miRTarBase	0.75	23446348	false	gene-gene-pos	23446348	+validated miRTarBase	1027	CDKN1B	MIMAT0000255	hsa-miR-34a-5p	1027 (validated miRTarBase) MIMAT0000255		0.75
validated miRTarBase	4592	1480	20371350	10659	hsa-miR-425-5p	gene-gene-pos	+validated miRTarBase	0.75	20371350	false	gene-gene-pos	20371350	+validated miRTarBase	10659	CELF2	MIMAT0003393	hsa-miR-425-5p	10659 (validated miRTarBase) MIMAT0003393		0.75
validated miRTarBase	6491	1480	19536157	79019	hsa-miR-136-5p	gene-gene-pos	+validated miRTarBase	0.75	19536157	false	gene-gene-pos	19536157	+validated miRTarBase	79019	CENPM	MIMAT0000448	hsa-miR-136-5p	79019 (validated miRTarBase) MIMAT0000448		0.75
validated miRTarBase	6158	1480	23824327	55839	hsa-miR-136-5p	gene-gene-pos	+validated miRTarBase	0.75	23824327	false	gene-gene-pos	23824327	+validated miRTarBase	55839	CENPN	MIMAT0000448	hsa-miR-136-5p	55839 (validated miRTarBase) MIMAT0000448		0.75
validated miRTarBase	5579	1480	21396852	29956	hsa-miR-133a-3p	gene-gene-pos	+validated miRTarBase	0.75	21396852	false	gene-gene-pos	21396852	+validated miRTarBase	29956	CERS2	MIMAT0000427	hsa-miR-133a	29956 (validated miRTarBase) MIMAT0000427		0.75
validated miRTarBase	5339	1480	23824327	253782	hsa-miR-425-5p	gene-gene-pos	+validated miRTarBase	0.75	23824327	false	gene-gene-pos	23824327	+validated miRTarBase	253782	CERS6	MIMAT0003393	hsa-miR-425-5p	253782 (validated miRTarBase) MIMAT0003393		0.75
validated miRTarBase	4604	1480	21566225	1072	hsa-miR-34a-5p	gene-gene-pos	+validated miRTarBase	0.75	21566225	false	gene-gene-pos	21566225	+validated miRTarBase	1072	CFL1	MIMAT0000255	hsa-miR-34a-5p	1072 (validated miRTarBase) MIMAT0000255		0.75
validated miRTarBase	6089	1480	19536157	54927	hsa-miR-136-5p	gene-gene-pos	+validated miRTarBase	0.75	19536157	false	gene-gene-pos	19536157	+validated miRTarBase	54927	CHCHD3	MIMAT0000448	hsa-miR-136-5p	54927 (validated miRTarBase) MIMAT0000448		0.75
validated miRTarBase	4826	1480	23824327	131474	hsa-miR-136-5p	gene-gene-pos	+validated miRTarBase	0.75	23824327	false	gene-gene-pos	23824327	+validated miRTarBase	131474	CHCHD4	MIMAT0000448	hsa-miR-136-5p	131474 (validated miRTarBase) MIMAT0000448		0.75
validated miRTarBase	4658	1480	23622248	1111	hsa-miR-99b-5p	gene-gene-pos	+validated miRTarBase	0.75	23622248	false	gene-gene-pos	23622248	+validated miRTarBase	1111	CHEK1	MIMAT0000689	hsa-miR-99b-5p	1111 (validated miRTarBase) MIMAT0000689		0.75
validated miRTarBase	4562	1480	21566225	10523	hsa-miR-34a-5p	gene-gene-pos	+validated miRTarBase	0.75	21566225	false	gene-gene-pos	21566225	+validated miRTarBase	10523	CHERP	MIMAT0000255	hsa-miR-34a-5p	10523 (validated miRTarBase) MIMAT0000255		0.75
validated miRTarBase	6023	1480	21572407|22012620	51652	hsa-miR-133a-3p	gene-gene-pos	+validated miRTarBase	0.75	21572407|22012620	false	gene-gene-pos	21572407|22012620	+validated miRTarBase	51652	CHMP3	MIMAT0000427	hsa-miR-133a	51652 (validated miRTarBase) MIMAT0000427		0.75
validated miRTarBase	4754	1480	23622248	1163	hsa-miR-425-5p	gene-gene-pos	+validated miRTarBase	0.75	23622248	false	gene-gene-pos	23622248	+validated miRTarBase	1163	CKS1B	MIMAT0003393	hsa-miR-425-5p	1163 (validated miRTarBase) MIMAT0003393		0.75
validated miRTarBase	4772	1480	23592263	1207	hsa-miR-24-1-5p	gene-gene-pos	+validated miRTarBase	0.75	23592263	false	gene-gene-pos	23592263	+validated miRTarBase	1207	CLNS1A	MIMAT0000079	hsa-miR-24-1-5p	1207 (validated miRTarBase) MIMAT0000079		0.75
validated miRTarBase	4775	1480	21566225	1212	hsa-miR-34a-5p	gene-gene-pos	+validated miRTarBase	0.75	21566225	false	gene-gene-pos	21566225	+validated miRTarBase	1212	CLTB	MIMAT0000255	hsa-miR-34a-5p	1212 (validated miRTarBase) MIMAT0000255		0.75
validated miRTarBase	4769	1480	23622248	1191	hsa-miR-425-5p	gene-gene-pos	+validated miRTarBase	0.75	23622248	false	gene-gene-pos	23622248	+validated miRTarBase	1191	CLU	MIMAT0003393	hsa-miR-425-5p	1191 (validated miRTarBase) MIMAT0003393		0.75
validated miRTarBase	4874	1480	19536157	146223	hsa-miR-133a-3p	gene-gene-pos	+validated miRTarBase	0.75	19536157	false	gene-gene-pos	19536157	+validated miRTarBase	146223	CMTM4	MIMAT0000427	hsa-miR-133a	146223 (validated miRTarBase) MIMAT0000427		0.75
validated miRTarBase	6086	1480	22012620	54918	hsa-miR-136-5p	gene-gene-pos	+validated miRTarBase	0.75	22012620	false	gene-gene-pos	22012620	+validated miRTarBase	54918	CMTM6	MIMAT0000448	hsa-miR-136-5p	54918 (validated miRTarBase) MIMAT0000448		0.75
validated miRTarBase	4799	1480	21396852|23592263	1265	hsa-miR-133a-3p	gene-gene-pos	+validated miRTarBase	0.75	21396852|23592263	false	gene-gene-pos	21396852|23592263	+validated miRTarBase	1265	CNN2	MIMAT0000427	hsa-miR-133a	1265 (validated miRTarBase) MIMAT0000427		0.75
validated miRTarBase	5399	1480	23622248	26047	hsa-miR-99b-5p	gene-gene-pos	+validated miRTarBase	0.75	23622248	false	gene-gene-pos	23622248	+validated miRTarBase	26047	CNTNAP2	MIMAT0000689	hsa-miR-99b-5p	26047 (validated miRTarBase) MIMAT0000689		0.75
validated miRTarBase	5993	1480	19536157	51287	hsa-miR-136-5p	gene-gene-pos	+validated miRTarBase	0.75	19536157	false	gene-gene-pos	19536157	+validated miRTarBase	51287	COA4	MIMAT0000448	hsa-miR-136-5p	51287 (validated miRTarBase) MIMAT0000448		0.75
validated miRTarBase	6326	1480	23622248	64708	hsa-miR-425-5p	gene-gene-pos	+validated miRTarBase	0.75	23622248	false	gene-gene-pos	23622248	+validated miRTarBase	64708	COPS7B	MIMAT0003393	hsa-miR-425-5p	64708 (validated miRTarBase) MIMAT0003393		0.75
validated miRTarBase	5123	1480	23592263	22818	hsa-miR-34a-5p	gene-gene-pos	+validated miRTarBase	0.75	23592263	false	gene-gene-pos	23592263	+validated miRTarBase	22818	COPZ1	MIMAT0000255	hsa-miR-34a-5p	22818 (validated miRTarBase) MIMAT0000255		0.75
validated miRTarBase	5126	1480	23824327	22849	hsa-miR-34a-5p	gene-gene-pos	+validated miRTarBase	0.75	23824327	false	gene-gene-pos	23824327	+validated miRTarBase	22849	CPEB3	MIMAT0000255	hsa-miR-34a-5p	22849 (validated miRTarBase) MIMAT0000255		0.75
validated miRTarBase	4838	1480	21566225	1376	hsa-miR-34a-5p	gene-gene-pos	+validated miRTarBase	0.75	21566225	false	gene-gene-pos	21566225	+validated miRTarBase	1376	CPT2	MIMAT0000255	hsa-miR-34a-5p	1376 (validated miRTarBase) MIMAT0000255		0.75
validated miRTarBase	6233	1480	20371350	58487	hsa-miR-425-5p	gene-gene-pos	+validated miRTarBase	0.75	20371350	false	gene-gene-pos	20371350	+validated miRTarBase	58487	CREBZF	MIMAT0003393	hsa-miR-425-5p	58487 (validated miRTarBase) MIMAT0003393		0.75
validated miRTarBase	4844	1480	23622248	1399	hsa-miR-425-5p	gene-gene-pos	+validated miRTarBase	0.75	23622248	false	gene-gene-pos	23622248	+validated miRTarBase	1399	CRKL	MIMAT0003393	hsa-miR-425-5p	1399 (validated miRTarBase) MIMAT0003393		0.75
validated miRTarBase	4850	1480	21566225	1409	hsa-miR-34a-5p	gene-gene-pos	+validated miRTarBase	0.75	21566225	false	gene-gene-pos	21566225	+validated miRTarBase	1409	CRYAA	MIMAT0000255	hsa-miR-34a-5p	1409 (validated miRTarBase) MIMAT0000255		0.75
validated miRTarBase	5066	1480	22815788	202	hsa-miR-34a-5p	gene-gene-pos	+validated miRTarBase	0.75	22815788	false	gene-gene-pos	22815788	+validated miRTarBase	202	CRYBG1	MIMAT0000255	hsa-miR-34a-5p	202 (validated miRTarBase) MIMAT0000255		0.75
validated miRTarBase	4853	1480	23622248	1434	hsa-miR-34a-5p	gene-gene-pos	+validated miRTarBase	0.75	23622248	false	gene-gene-pos	23622248	+validated miRTarBase	1434	CSE1L	MIMAT0000255	hsa-miR-34a-5p	1434 (validated miRTarBase) MIMAT0000255		0.75
validated miRTarBase	4865	1480	19536157	1452	hsa-miR-136-5p	gene-gene-pos	+validated miRTarBase	0.75	19536157	false	gene-gene-pos	19536157	+validated miRTarBase	1452	CSNK1A1	MIMAT0000448	hsa-miR-136-5p	1452 (validated miRTarBase) MIMAT0000448		0.75
validated miRTarBase	4868	1480	19536157|23824327	1457	hsa-miR-136-5p	gene-gene-pos	+validated miRTarBase	0.75	19536157|23824327	false	gene-gene-pos	19536157|23824327	+validated miRTarBase	1457	CSNK2A1	MIMAT0000448	hsa-miR-136-5p	1457 (validated miRTarBase) MIMAT0000448		0.75
validated miRTarBase	5225	1480	20371350|21572407	23283	hsa-miR-136-5p	gene-gene-pos	+validated miRTarBase	0.75	20371350|21572407	false	gene-gene-pos	20371350|21572407	+validated miRTarBase	23283	CSTF2T	MIMAT0000448	hsa-miR-136-5p	23283 (validated miRTarBase) MIMAT0000448		0.75
validated miRTarBase	4880	1480	21566225	1499	hsa-miR-34a-5p	gene-gene-pos	+validated miRTarBase	0.75	21566225	false	gene-gene-pos	21566225	+validated miRTarBase	1499	CTNNB1	MIMAT0000255	hsa-miR-34a-5p	1499 (validated miRTarBase) MIMAT0000255		0.75
validated miRTarBase	5057	1480	21566225	2017	hsa-miR-34a-5p	gene-gene-pos	+validated miRTarBase	0.75	21566225	false	gene-gene-pos	21566225	+validated miRTarBase	2017	CTTN	MIMAT0000255	hsa-miR-34a-5p	2017 (validated miRTarBase) MIMAT0000255		0.75
validated miRTarBase	4901	1480	23313552	1534	hsa-miR-425-5p	gene-gene-pos	+validated miRTarBase	0.75	23313552	false	gene-gene-pos	23313552	+validated miRTarBase	1534	CYB561	MIMAT0003393	hsa-miR-425-5p	1534 (validated miRTarBase) MIMAT0003393		0.75
validated miRTarBase	6203	1480	22100165	57404	hsa-miR-24-1-5p	gene-gene-pos	+validated miRTarBase	0.75	22100165	false	gene-gene-pos	22100165	+validated miRTarBase	57404	CYP20A1	MIMAT0000079	hsa-miR-24-1-5p	57404 (validated miRTarBase) MIMAT0000079		0.75
validated miRTarBase	4919	1480	21566225	1595	hsa-miR-34a-5p	gene-gene-pos	+validated miRTarBase	0.75	21566225	false	gene-gene-pos	21566225	+validated miRTarBase	1595	CYP51A1	MIMAT0000255	hsa-miR-34a-5p	1595 (validated miRTarBase) MIMAT0000255		0.75
validated miRTarBase	6518	1480	22012620	79877	hsa-miR-133a-3p	gene-gene-pos	+validated miRTarBase	0.75	22012620	false	gene-gene-pos	22012620	+validated miRTarBase	79877	DCAKD	MIMAT0000427	hsa-miR-133a	79877 (validated miRTarBase) MIMAT0000427		0.75
validated miRTarBase	5294	1480	21566225	23576	hsa-miR-34a-5p	gene-gene-pos	+validated miRTarBase	0.75	21566225	false	gene-gene-pos	21566225	+validated miRTarBase	23576	DDAH1	MIMAT0000255	hsa-miR-34a-5p	23576 (validated miRTarBase) MIMAT0000255		0.75
validated miRTarBase	5291	1480	21566225	23564	hsa-miR-34a-5p	gene-gene-pos	+validated miRTarBase	0.75	21566225	false	gene-gene-pos	21566225	+validated miRTarBase	23564	DDAH2	MIMAT0000255	hsa-miR-34a-5p	23564 (validated miRTarBase) MIMAT0000255		0.75
validated miRTarBase	6554	1480	23824327	80821	hsa-miR-136-5p	gene-gene-pos	+validated miRTarBase	0.75	23824327	false	gene-gene-pos	23824327	+validated miRTarBase	80821	DDHD1	MIMAT0000448	hsa-miR-136-5p	80821 (validated miRTarBase) MIMAT0000448		0.75
validated miRTarBase	5216	1480	23622248	23259	hsa-miR-99b-5p	gene-gene-pos	+validated miRTarBase	0.75	23622248	false	gene-gene-pos	23622248	+validated miRTarBase	23259	DDHD2	MIMAT0000689	hsa-miR-99b-5p	23259 (validated miRTarBase) MIMAT0000689		0.75
validated miRTarBase	6071	1480	21572407	54541	hsa-miR-24-1-5p	gene-gene-pos	+validated miRTarBase	0.75	21572407	false	gene-gene-pos	21572407	+validated miRTarBase	54541	DDIT4	MIMAT0000079	hsa-miR-24-1-5p	54541 (validated miRTarBase) MIMAT0000079		0.75
validated miRTarBase	4955	1480	21566225	1662	hsa-miR-34a-5p	gene-gene-pos	+validated miRTarBase	0.75	21566225	false	gene-gene-pos	21566225	+validated miRTarBase	1662	DDX10	MIMAT0000255	hsa-miR-34a-5p	1662 (validated miRTarBase) MIMAT0000255		0.75
validated miRTarBase	4715	1480	23592263	11269	hsa-miR-34a-5p	gene-gene-pos	+validated miRTarBase	0.75	23592263	false	gene-gene-pos	23592263	+validated miRTarBase	11269	DDX19B	MIMAT0000255	hsa-miR-34a-5p	11269 (validated miRTarBase) MIMAT0000255		0.75
validated miRTarBase	4453	1480	23622248	10212	hsa-miR-99b-5p	gene-gene-pos	+validated miRTarBase	0.75	23622248	false	gene-gene-pos	23622248	+validated miRTarBase	10212	DDX39A	MIMAT0000689	hsa-miR-99b-5p	10212 (validated miRTarBase) MIMAT0000689		0.75
validated miRTarBase	4943	1480	20371350	1656	hsa-miR-425-5p	gene-gene-pos	+validated miRTarBase	0.75	20371350	false	gene-gene-pos	20371350	+validated miRTarBase	1656	DDX6	MIMAT0003393	hsa-miR-425-5p	1656 (validated miRTarBase) MIMAT0003393		0.75
validated miRTarBase	6644	1480	23622248	8562	hsa-miR-425-5p	gene-gene-pos	+validated miRTarBase	0.75	23622248	false	gene-gene-pos	23622248	+validated miRTarBase	8562	DENR	MIMAT0003393	hsa-miR-425-5p	8562 (validated miRTarBase) MIMAT0003393		0.75
validated miRTarBase	4973	9303.39	21566225	1717	hsa-miR-34a-5p	gene-gene-pos	+validated miRTarBase	0.75	21566225	false	gene-gene-pos	21566225	+validated miRTarBase	1717	DHCR7	MIMAT0000255	hsa-miR-34a-5p	1717 (validated miRTarBase) MIMAT0000255		0.75
validated miRTarBase	4976	8565.12	20371350	1717	hsa-miR-425-5p	gene-gene-pos	+validated miRTarBase	0.75	20371350	false	gene-gene-pos	20371350	+validated miRTarBase	1717	DHCR7	MIMAT0003393	hsa-miR-425-5p	1717 (validated miRTarBase) MIMAT0003393		0.75
validated miRTarBase	4979	1480	23622248	1719	hsa-miR-99b-5p	gene-gene-pos	+validated miRTarBase	0.75	23622248	false	gene-gene-pos	23622248	+validated miRTarBase	1719	DHFR	MIMAT0000689	hsa-miR-99b-5p	1719 (validated miRTarBase) MIMAT0000689		0.75
validated miRTarBase	6182	1480	22012620	56919	hsa-miR-24-1-5p	gene-gene-pos	+validated miRTarBase	0.75	22012620	false	gene-gene-pos	22012620	+validated miRTarBase	56919	DHX33	MIMAT0000079	hsa-miR-24-1-5p	56919 (validated miRTarBase) MIMAT0000079		0.75
validated miRTarBase	5255	1480	20371350	23405	hsa-miR-425-5p	gene-gene-pos	+validated miRTarBase	0.75	20371350	false	gene-gene-pos	20371350	+validated miRTarBase	23405	DICER1	MIMAT0003393	hsa-miR-425-5p	23405 (validated miRTarBase) MIMAT0003393		0.75
validated miRTarBase	5456	1480	23824327	27185	hsa-miR-136-5p	gene-gene-pos	+validated miRTarBase	0.75	23824327	false	gene-gene-pos	23824327	+validated miRTarBase	27185	DISC1	MIMAT0000448	hsa-miR-136-5p	27185 (validated miRTarBase) MIMAT0000448		0.75
validated miRTarBase	5723	1480	22100165	352909	hsa-miR-34a-5p	gene-gene-pos	+validated miRTarBase	0.75	22100165	false	gene-gene-pos	22100165	+validated miRTarBase	352909	DNAAF3	MIMAT0000255	hsa-miR-34a-5p	352909 (validated miRTarBase) MIMAT0000255		0.75
validated miRTarBase	4402	1480	21566225	10049	hsa-miR-34a-5p	gene-gene-pos	+validated miRTarBase	0.75	21566225	false	gene-gene-pos	21566225	+validated miRTarBase	10049	DNAJB6	MIMAT0000255	hsa-miR-34a-5p	10049 (validated miRTarBase) MIMAT0000255		0.75
validated miRTarBase	4985	1480	22815788	1795	hsa-miR-34a-5p	gene-gene-pos	+validated miRTarBase	0.75	22815788	false	gene-gene-pos	22815788	+validated miRTarBase	1795	DOCK3	MIMAT0000255	hsa-miR-34a-5p	1795 (validated miRTarBase) MIMAT0000255		0.75
validated miRTarBase	4988	1480	23622248	1808	hsa-miR-425-5p	gene-gene-pos	+validated miRTarBase	0.75	23622248	false	gene-gene-pos	23622248	+validated miRTarBase	1808	DPYSL2	MIMAT0003393	hsa-miR-425-5p	1808 (validated miRTarBase) MIMAT0003393		0.75
validated miRTarBase	4991	1480	23824327	1810	hsa-miR-136-5p	gene-gene-pos	+validated miRTarBase	0.75	23824327	false	gene-gene-pos	23824327	+validated miRTarBase	1810	DR1	MIMAT0000448	hsa-miR-136-5p	1810 (validated miRTarBase) MIMAT0000448		0.75
validated miRTarBase	5000	1480	21566225	1832	hsa-miR-34a-5p	gene-gene-pos	+validated miRTarBase	0.75	21566225	false	gene-gene-pos	21566225	+validated miRTarBase	1832	DSP	MIMAT0000255	hsa-miR-34a-5p	1832 (validated miRTarBase) MIMAT0000255		0.75
validated miRTarBase	6386	1480	24374217	667	hsa-miR-136-5p	gene-gene-pos	+validated miRTarBase	0.75	24374217	false	gene-gene-pos	24374217	+validated miRTarBase	667	DST	MIMAT0000448	hsa-miR-136-5p	667 (validated miRTarBase) MIMAT0000448		0.75
validated miRTarBase	5003	1480	21566225	1841	hsa-miR-34a-5p	gene-gene-pos	+validated miRTarBase	0.75	21566225	false	gene-gene-pos	21566225	+validated miRTarBase	1841	DTYMK	MIMAT0000255	hsa-miR-34a-5p	1841 (validated miRTarBase) MIMAT0000255		0.75
validated miRTarBase	5006	1480	21566225	1854	hsa-miR-34a-5p	gene-gene-pos	+validated miRTarBase	0.75	21566225	false	gene-gene-pos	21566225	+validated miRTarBase	1854	DUT	MIMAT0000255	hsa-miR-34a-5p	1854 (validated miRTarBase) MIMAT0000255		0.75
validated miRTarBase	5357	1480	21396852	255758	hsa-miR-133a-3p	gene-gene-pos	+validated miRTarBase	0.75	21396852	false	gene-gene-pos	21396852	+validated miRTarBase	255758	DYNLT2B	MIMAT0000427	hsa-miR-133a	255758 (validated miRTarBase) MIMAT0000427		0.75
validated miRTarBase	5009	1480	23622248	1859	hsa-miR-99b-5p	gene-gene-pos	+validated miRTarBase	0.75	23622248	false	gene-gene-pos	23622248	+validated miRTarBase	1859	DYRK1A	MIMAT0000689	hsa-miR-99b-5p	1859 (validated miRTarBase) MIMAT0000689		0.75
validated miRTarBase	5018	8565.12	21572407	1871	hsa-miR-425-5p	gene-gene-pos	+validated miRTarBase	0.75	21572407	false	gene-gene-pos	21572407	+validated miRTarBase	1871	E2F3	MIMAT0003393	hsa-miR-425-5p	1871 (validated miRTarBase) MIMAT0003393		0.75
validated miRTarBase	5021	1480	19461653	1875	hsa-miR-34a-5p	gene-gene-pos	+validated miRTarBase	0.75	19461653	false	gene-gene-pos	19461653	+validated miRTarBase	1875	E2F5	MIMAT0000255	hsa-miR-34a-5p	1875 (validated miRTarBase) MIMAT0000255		0.75
validated miRTarBase	4724	1480	21566225	11319	hsa-miR-34a-5p	gene-gene-pos	+validated miRTarBase	0.75	21566225	false	gene-gene-pos	21566225	+validated miRTarBase	11319	ECD	MIMAT0000255	hsa-miR-34a-5p	11319 (validated miRTarBase) MIMAT0000255		0.75
validated miRTarBase	6530	1480	23622248	80153	hsa-miR-99b-5p	gene-gene-pos	+validated miRTarBase	0.75	23622248	false	gene-gene-pos	23622248	+validated miRTarBase	80153	EDC3	MIMAT0000689	hsa-miR-99b-5p	80153 (validated miRTarBase) MIMAT0000689		0.75
validated miRTarBase	6674	1480	23622248	8721	hsa-miR-99b-5p	gene-gene-pos	+validated miRTarBase	0.75	23622248	false	gene-gene-pos	23622248	+validated miRTarBase	8721	EDF1	MIMAT0000689	hsa-miR-99b-5p	8721 (validated miRTarBase) MIMAT0000689		0.75
validated miRTarBase	5024	1480	23622248	1938	hsa-miR-99b-5p	gene-gene-pos	+validated miRTarBase	0.75	23622248	false	gene-gene-pos	23622248	+validated miRTarBase	1938	EEF2	MIMAT0000689	hsa-miR-99b-5p	1938 (validated miRTarBase) MIMAT0000689		0.75
validated miRTarBase	6500	42842	23592263	79180	hsa-miR-136-5p	gene-gene-pos	+validated miRTarBase	0.75	23592263	false	gene-gene-pos	23592263	+validated miRTarBase	79180	EFHD2	MIMAT0000448	hsa-miR-136-5p	79180 (validated miRTarBase) MIMAT0000448		0.75
validated miRTarBase	6494	19366	21566225	79180	hsa-miR-34a-5p	gene-gene-pos	+validated miRTarBase	0.75	21566225	false	gene-gene-pos	21566225	+validated miRTarBase	79180	EFHD2	MIMAT0000255	hsa-miR-34a-5p	79180 (validated miRTarBase) MIMAT0000255		0.75
validated miRTarBase	6497	41792.4	23592263	79180	hsa-miR-133a-3p	gene-gene-pos	+validated miRTarBase	0.75	23592263	false	gene-gene-pos	23592263	+validated miRTarBase	79180	EFHD2	MIMAT0000427	hsa-miR-133a	79180 (validated miRTarBase) MIMAT0000427		0.75
validated miRTarBase	5027	1480	21566225|23592263	1947	hsa-miR-34a-5p	gene-gene-pos	+validated miRTarBase	0.75	21566225|23592263	false	gene-gene-pos	21566225|23592263	+validated miRTarBase	1947	EFNB1	MIMAT0000255	hsa-miR-34a-5p	1947 (validated miRTarBase) MIMAT0000255		0.75
validated miRTarBase	4706	1480	19536157	112398	hsa-miR-136-5p	gene-gene-pos	+validated miRTarBase	0.75	19536157	false	gene-gene-pos	19536157	+validated miRTarBase	112398	EGLN2	MIMAT0000448	hsa-miR-136-5p	112398 (validated miRTarBase) MIMAT0000448		0.75
validated miRTarBase	4622	1480	21566225	10938	hsa-miR-34a-5p	gene-gene-pos	+validated miRTarBase	0.75	21566225	false	gene-gene-pos	21566225	+validated miRTarBase	10938	EHD1	MIMAT0000255	hsa-miR-34a-5p	10938 (validated miRTarBase) MIMAT0000255		0.75
validated miRTarBase	6659	1480	23622248	8663	hsa-miR-425-5p	gene-gene-pos	+validated miRTarBase	0.75	23622248	false	gene-gene-pos	23622248	+validated miRTarBase	8663	EIF3C	MIMAT0003393	hsa-miR-425-5p	8663 (validated miRTarBase) MIMAT0003393		0.75
validated miRTarBase	6662	1480	23622248	8666	hsa-miR-425-5p	gene-gene-pos	+validated miRTarBase	0.75	23622248	false	gene-gene-pos	23622248	+validated miRTarBase	8666	EIF3G	MIMAT0003393	hsa-miR-425-5p	8666 (validated miRTarBase) MIMAT0003393		0.75
validated miRTarBase	6776	1480	23622248	9775	hsa-miR-99b-5p	gene-gene-pos	+validated miRTarBase	0.75	23622248	false	gene-gene-pos	23622248	+validated miRTarBase	9775	EIF4A3	MIMAT0000689	hsa-miR-99b-5p	9775 (validated miRTarBase) MIMAT0000689		0.75
validated miRTarBase	5042	1480	20371350	1981	hsa-miR-34a-5p	gene-gene-pos	+validated miRTarBase	0.75	20371350	false	gene-gene-pos	20371350	+validated miRTarBase	1981	EIF4G1	MIMAT0000255	hsa-miR-34a-5p	1981 (validated miRTarBase) MIMAT0000255		0.75
validated miRTarBase	6665	1480	24374217	8672	hsa-miR-136-5p	gene-gene-pos	+validated miRTarBase	0.75	24374217	false	gene-gene-pos	24374217	+validated miRTarBase	8672	EIF4G3	MIMAT0000448	hsa-miR-136-5p	8672 (validated miRTarBase) MIMAT0000448		0.75
validated miRTarBase	6266	1480	23446348	60481	hsa-miR-24-1-5p	gene-gene-pos	+validated miRTarBase	0.75	23446348	false	gene-gene-pos	23446348	+validated miRTarBase	60481	ELOVL5	MIMAT0000079	hsa-miR-24-1-5p	60481 (validated miRTarBase) MIMAT0000079		0.75
validated miRTarBase	4811	1480	23592263	129080	hsa-miR-133a-3p	gene-gene-pos	+validated miRTarBase	0.75	23592263	false	gene-gene-pos	23592263	+validated miRTarBase	129080	EMID1	MIMAT0000427	hsa-miR-133a	129080 (validated miRTarBase) MIMAT0000427		0.75
validated miRTarBase	5054	1480	17540599	2012	hsa-miR-34a-5p	gene-gene-pos	+validated miRTarBase	0.75	17540599	false	gene-gene-pos	17540599	+validated miRTarBase	2012	EMP1	MIMAT0000255	hsa-miR-34a-5p	2012 (validated miRTarBase) MIMAT0000255		0.75
validated miRTarBase	5063	1480	23622248	2026	hsa-miR-99b-5p	gene-gene-pos	+validated miRTarBase	0.75	23622248	false	gene-gene-pos	23622248	+validated miRTarBase	2026	ENO2	MIMAT0000689	hsa-miR-99b-5p	2026 (validated miRTarBase) MIMAT0000689		0.75
validated miRTarBase	6026	1480	23313552	5167	hsa-miR-136-5p	gene-gene-pos	+validated miRTarBase	0.75	23313552	false	gene-gene-pos	23313552	+validated miRTarBase	5167	ENPP1	MIMAT0000448	hsa-miR-136-5p	5167 (validated miRTarBase) MIMAT0000448		0.75
validated miRTarBase	5495	1480	21572407|23592263	285203	hsa-miR-425-5p	gene-gene-pos	+validated miRTarBase	0.75	21572407|23592263	false	gene-gene-pos	21572407|23592263	+validated miRTarBase	285203	EOGT	MIMAT0003393	hsa-miR-425-5p	285203 (validated miRTarBase) MIMAT0003393		0.75
validated miRTarBase	5069	1480	21566225	2037	hsa-miR-34a-5p	gene-gene-pos	+validated miRTarBase	0.75	21566225	false	gene-gene-pos	21566225	+validated miRTarBase	2037	EPB41L2	MIMAT0000255	hsa-miR-34a-5p	2037 (validated miRTarBase) MIMAT0000255		0.75
validated miRTarBase	5036	1480	21566225	1969	hsa-miR-34a-5p	gene-gene-pos	+validated miRTarBase	0.75	21566225	false	gene-gene-pos	21566225	+validated miRTarBase	1969	EPHA2	MIMAT0000255	hsa-miR-34a-5p	1969 (validated miRTarBase) MIMAT0000255		0.75
validated miRTarBase	6782	1480	21572407	9852	hsa-miR-425-5p	gene-gene-pos	+validated miRTarBase	0.75	21572407	false	gene-gene-pos	21572407	+validated miRTarBase	9852	EPM2AIP1	MIMAT0003393	hsa-miR-425-5p	9852 (validated miRTarBase) MIMAT0003393		0.75
validated miRTarBase	4574	1480	21566225|23622248	10613	hsa-miR-34a-5p	gene-gene-pos	+validated miRTarBase	0.75	21566225|23622248	false	gene-gene-pos	21566225|23622248	+validated miRTarBase	10613	ERLIN1	MIMAT0000255	hsa-miR-34a-5p	10613 (validated miRTarBase) MIMAT0000255		0.75
validated miRTarBase	4679	1480	21566225	11160	hsa-miR-34a-5p	gene-gene-pos	+validated miRTarBase	0.75	21566225	false	gene-gene-pos	21566225	+validated miRTarBase	11160	ERLIN2	MIMAT0000255	hsa-miR-34a-5p	11160 (validated miRTarBase) MIMAT0000255		0.75
validated miRTarBase	5075	1480	23622248	2120	hsa-miR-99b-5p	gene-gene-pos	+validated miRTarBase	0.75	23622248	false	gene-gene-pos	23622248	+validated miRTarBase	2120	ETV6	MIMAT0000689	hsa-miR-99b-5p	2120 (validated miRTarBase) MIMAT0000689		0.75
validated miRTarBase	4748	1480	21572407	115704	hsa-miR-34a-5p	gene-gene-pos	+validated miRTarBase	0.75	21572407	false	gene-gene-pos	21572407	+validated miRTarBase	115704	EVI5L	MIMAT0000255	hsa-miR-34a-5p	115704 (validated miRTarBase) MIMAT0000255		0.75
validated miRTarBase	6809	1480	23592263	9941	hsa-miR-425-5p	gene-gene-pos	+validated miRTarBase	0.75	23592263	false	gene-gene-pos	23592263	+validated miRTarBase	9941	EXOG	MIMAT0003393	hsa-miR-425-5p	9941 (validated miRTarBase) MIMAT0003393		0.75
validated miRTarBase	5252	1480	20371350	23404	hsa-miR-136-5p	gene-gene-pos	+validated miRTarBase	0.75	20371350	false	gene-gene-pos	20371350	+validated miRTarBase	23404	EXOSC2	MIMAT0000448	hsa-miR-136-5p	23404 (validated miRTarBase) MIMAT0000448		0.75
validated miRTarBase	5078	1480	23622248	2132	hsa-miR-34a-5p	gene-gene-pos	+validated miRTarBase	0.75	23622248	false	gene-gene-pos	23622248	+validated miRTarBase	2132	EXT2	MIMAT0000255	hsa-miR-34a-5p	2132 (validated miRTarBase) MIMAT0000255		0.75
validated miRTarBase	5087	1480	21566225	2184	hsa-miR-34a-5p	gene-gene-pos	+validated miRTarBase	0.75	21566225	false	gene-gene-pos	21566225	+validated miRTarBase	2184	FAH	MIMAT0000255	hsa-miR-34a-5p	2184 (validated miRTarBase) MIMAT0000255		0.75
validated miRTarBase	6731	1480	19536157	92689	hsa-miR-425-5p	gene-gene-pos	+validated miRTarBase	0.75	19536157	false	gene-gene-pos	19536157	+validated miRTarBase	92689	FAM114A1	MIMAT0003393	hsa-miR-425-5p	92689 (validated miRTarBase) MIMAT0003393		0.75
validated miRTarBase	6095	1480	21396852	54954	hsa-miR-133a-3p	gene-gene-pos	+validated miRTarBase	0.75	21396852	false	gene-gene-pos	21396852	+validated miRTarBase	54954	FAM120C	MIMAT0000427	hsa-miR-133a	54954 (validated miRTarBase) MIMAT0000427		0.75
validated miRTarBase	5996	1480	23824327	51306	hsa-miR-136-5p	gene-gene-pos	+validated miRTarBase	0.75	23824327	false	gene-gene-pos	23824327	+validated miRTarBase	51306	FAM13B	MIMAT0000448	hsa-miR-136-5p	51306 (validated miRTarBase) MIMAT0000448		0.75
validated miRTarBase	5483	1480	23622248	284069	hsa-miR-99b-5p	gene-gene-pos	+validated miRTarBase	0.75	23622248	false	gene-gene-pos	23622248	+validated miRTarBase	284069	FAM171A2	MIMAT0000689	hsa-miR-99b-5p	284069 (validated miRTarBase) MIMAT0000689		0.75
validated miRTarBase	6542	1480	19536157	80256	hsa-miR-136-5p	gene-gene-pos	+validated miRTarBase	0.75	19536157	false	gene-gene-pos	19536157	+validated miRTarBase	80256	FAM214B	MIMAT0000448	hsa-miR-136-5p	80256 (validated miRTarBase) MIMAT0000448		0.75
validated miRTarBase	6281	1480	19536157	619208	hsa-miR-136-5p	gene-gene-pos	+validated miRTarBase	0.75	19536157	false	gene-gene-pos	19536157	+validated miRTarBase	619208	FAM229B	MIMAT0000448	hsa-miR-136-5p	619208 (validated miRTarBase) MIMAT0000448		0.75
validated miRTarBase	4544	1480	21566225	10447	hsa-miR-34a-5p	gene-gene-pos	+validated miRTarBase	0.75	21566225	false	gene-gene-pos	21566225	+validated miRTarBase	10447	FAM3C	MIMAT0000255	hsa-miR-34a-5p	10447 (validated miRTarBase) MIMAT0000255		0.75
validated miRTarBase	4733	1480	19536157	113828	hsa-miR-136-5p	gene-gene-pos	+validated miRTarBase	0.75	19536157	false	gene-gene-pos	19536157	+validated miRTarBase	113828	FAM83F	MIMAT0000448	hsa-miR-136-5p	113828 (validated miRTarBase) MIMAT0000448		0.75
validated miRTarBase	5780	1480	20371350	375061	hsa-miR-425-5p	gene-gene-pos	+validated miRTarBase	0.75	20371350	false	gene-gene-pos	20371350	+validated miRTarBase	375061	FAM89A	MIMAT0003393	hsa-miR-425-5p	375061 (validated miRTarBase) MIMAT0003393		0.75
validated miRTarBase	6008	1480	23622248	51439	hsa-miR-99b-5p	gene-gene-pos	+validated miRTarBase	0.75	23622248	false	gene-gene-pos	23622248	+validated miRTarBase	51439	FAM8A1	MIMAT0000689	hsa-miR-99b-5p	51439 (validated miRTarBase) MIMAT0000689		0.75
validated miRTarBase	4967	1480	19536157	171484	hsa-miR-136-5p	gene-gene-pos	+validated miRTarBase	0.75	19536157	false	gene-gene-pos	19536157	+validated miRTarBase	171484	FAM9C	MIMAT0000448	hsa-miR-136-5p	171484 (validated miRTarBase) MIMAT0000448		0.75
validated miRTarBase	6080	1480	23592263	54751	hsa-miR-136-5p	gene-gene-pos	+validated miRTarBase	0.75	23592263	false	gene-gene-pos	23592263	+validated miRTarBase	54751	FBLIM1	MIMAT0000448	hsa-miR-136-5p	54751 (validated miRTarBase) MIMAT0000448		0.75
validated miRTarBase	5096	1480	21396852	2200	hsa-miR-133a-3p	gene-gene-pos	+validated miRTarBase	0.75	21396852	false	gene-gene-pos	21396852	+validated miRTarBase	2200	FBN1	MIMAT0000427	hsa-miR-133a	2200 (validated miRTarBase) MIMAT0000427		0.75
validated miRTarBase	5102	1480	22012620	2215	hsa-miR-136-5p	gene-gene-pos	+validated miRTarBase	0.75	22012620	false	gene-gene-pos	22012620	+validated miRTarBase	2215	FCGR3B	MIMAT0000448	hsa-miR-136-5p	2215 (validated miRTarBase) MIMAT0000448		0.75
validated miRTarBase	5108	1480	21566225	2237	hsa-miR-34a-5p	gene-gene-pos	+validated miRTarBase	0.75	21566225	false	gene-gene-pos	21566225	+validated miRTarBase	2237	FEN1	MIMAT0000255	hsa-miR-34a-5p	2237 (validated miRTarBase) MIMAT0000255		0.75
validated miRTarBase	5117	1480	23622248	2271	hsa-miR-34a-5p	gene-gene-pos	+validated miRTarBase	0.75	23622248	false	gene-gene-pos	23622248	+validated miRTarBase	2271	FH	MIMAT0000255	hsa-miR-34a-5p	2271 (validated miRTarBase) MIMAT0000255		0.75
validated miRTarBase	6227	1480	21572407	57700	hsa-miR-133a-3p	gene-gene-pos	+validated miRTarBase	0.75	21572407	false	gene-gene-pos	21572407	+validated miRTarBase	57700	FHIP2A	MIMAT0000427	hsa-miR-133a	57700 (validated miRTarBase) MIMAT0000427		0.75
validated miRTarBase	4670	1480	20371350|23446348	11153	hsa-miR-34a-5p	gene-gene-pos	+validated miRTarBase	0.75	20371350|23446348	false	gene-gene-pos	20371350|23446348	+validated miRTarBase	11153	FICD	MIMAT0000255	hsa-miR-34a-5p	11153 (validated miRTarBase) MIMAT0000255		0.75
validated miRTarBase	6758	1480	24374217	96459	hsa-miR-136-5p	gene-gene-pos	+validated miRTarBase	0.75	24374217	false	gene-gene-pos	24374217	+validated miRTarBase	96459	FNIP1	MIMAT0000448	hsa-miR-136-5p	96459 (validated miRTarBase) MIMAT0000448		0.75
validated miRTarBase	5288	1480	23824327	2355	hsa-miR-133a-3p	gene-gene-pos	+validated miRTarBase	0.75	23824327	false	gene-gene-pos	23824327	+validated miRTarBase	2355	FOSL2	MIMAT0000427	hsa-miR-133a	2355 (validated miRTarBase) MIMAT0000427		0.75
validated miRTarBase	5132	1480	20371350	22887	hsa-miR-425-5p	gene-gene-pos	+validated miRTarBase	0.75	20371350	false	gene-gene-pos	20371350	+validated miRTarBase	22887	FOXJ3	MIMAT0003393	hsa-miR-425-5p	22887 (validated miRTarBase) MIMAT0003393		0.75
validated miRTarBase	5738	1480	23622248	3607	hsa-miR-425-5p	gene-gene-pos	+validated miRTarBase	0.75	23622248	false	gene-gene-pos	23622248	+validated miRTarBase	3607	FOXK2	MIMAT0003393	hsa-miR-425-5p	3607 (validated miRTarBase) MIMAT0003393		0.75
validated miRTarBase	4661	9303.39	21572407|23592263	1112	hsa-miR-34a-5p	gene-gene-pos	+validated miRTarBase	0.75	21572407|23592263	false	gene-gene-pos	21572407|23592263	+validated miRTarBase	1112	FOXN3	MIMAT0000255	hsa-miR-34a-5p	1112 (validated miRTarBase) MIMAT0000255		0.75
validated miRTarBase	4664	8565.12	21572407|23592263	1112	hsa-miR-425-5p	gene-gene-pos	+validated miRTarBase	0.75	21572407|23592263	false	gene-gene-pos	21572407|23592263	+validated miRTarBase	1112	FOXN3	MIMAT0003393	hsa-miR-425-5p	1112 (validated miRTarBase) MIMAT0003393		0.75
validated miRTarBase	4429	1480	22012620	10129	hsa-miR-425-5p	gene-gene-pos	+validated miRTarBase	0.75	22012620	false	gene-gene-pos	22012620	+validated miRTarBase	10129	FRY	MIMAT0003393	hsa-miR-425-5p	10129 (validated miRTarBase) MIMAT0003393		0.75
validated miRTarBase	5330	1480	21572407	2526	hsa-miR-136-5p	gene-gene-pos	+validated miRTarBase	0.75	21572407	false	gene-gene-pos	21572407	+validated miRTarBase	2526	FUT4	MIMAT0000448	hsa-miR-136-5p	2526 (validated miRTarBase) MIMAT0000448		0.75
validated miRTarBase	6791	10147.7	24374217	9908	hsa-miR-136-5p	gene-gene-pos	+validated miRTarBase	0.75	24374217	false	gene-gene-pos	24374217	+validated miRTarBase	9908	G3BP2	MIMAT0000448	hsa-miR-136-5p	9908 (validated miRTarBase) MIMAT0000448		0.75
validated miRTarBase	6788	10743.4	21566225	9908	hsa-miR-34a-5p	gene-gene-pos	+validated miRTarBase	0.75	21566225	false	gene-gene-pos	21566225	+validated miRTarBase	9908	G3BP2	MIMAT0000255	hsa-miR-34a-5p	9908 (validated miRTarBase) MIMAT0000255		0.75
validated miRTarBase	5363	1480	23824327	2566	hsa-miR-136-5p	gene-gene-pos	+validated miRTarBase	0.75	23824327	false	gene-gene-pos	23824327	+validated miRTarBase	2566	GABRG2	MIMAT0000448	hsa-miR-136-5p	2566 (validated miRTarBase) MIMAT0000448		0.75
validated miRTarBase	6641	1480	19536157	85569	hsa-miR-136-5p	gene-gene-pos	+validated miRTarBase	0.75	19536157	false	gene-gene-pos	19536157	+validated miRTarBase	85569	GALP	MIMAT0000448	hsa-miR-136-5p	85569 (validated miRTarBase) MIMAT0000448		0.75
validated miRTarBase	6563	1480	20371350|21572407|22012620|23446348	8139	hsa-miR-425-5p	gene-gene-pos	+validated miRTarBase	0.75	20371350|21572407|22012620|23446348	false	gene-gene-pos	20371350|21572407|22012620|23446348	+validated miRTarBase	8139	GAN	MIMAT0003393	hsa-miR-425-5p	8139 (validated miRTarBase) MIMAT0003393		0.75
validated miRTarBase	5198	10147.7	19536157	23193	hsa-miR-136-5p	gene-gene-pos	+validated miRTarBase	0.75	19536157	false	gene-gene-pos	19536157	+validated miRTarBase	23193	GANAB	MIMAT0000448	hsa-miR-136-5p	23193 (validated miRTarBase) MIMAT0000448		0.75
validated miRTarBase	5195	10743.4	23622248	23193	hsa-miR-34a-5p	gene-gene-pos	+validated miRTarBase	0.75	23622248	false	gene-gene-pos	23622248	+validated miRTarBase	23193	GANAB	MIMAT0000255	hsa-miR-34a-5p	23193 (validated miRTarBase) MIMAT0000255		0.75
validated miRTarBase	5417	10147.7	23824327	26130	hsa-miR-136-5p	gene-gene-pos	+validated miRTarBase	0.75	23824327	false	gene-gene-pos	23824327	+validated miRTarBase	26130	GAPVD1	MIMAT0000448	hsa-miR-136-5p	26130 (validated miRTarBase) MIMAT0000448		0.75
validated miRTarBase	5414	10743.4	21566225	26130	hsa-miR-34a-5p	gene-gene-pos	+validated miRTarBase	0.75	21566225	false	gene-gene-pos	21566225	+validated miRTarBase	26130	GAPVD1	MIMAT0000255	hsa-miR-34a-5p	26130 (validated miRTarBase) MIMAT0000255		0.75
validated miRTarBase	5429	1480	23622248	2626	hsa-miR-34a-5p	gene-gene-pos	+validated miRTarBase	0.75	23622248	false	gene-gene-pos	23622248	+validated miRTarBase	2626	GATA4	MIMAT0000255	hsa-miR-34a-5p	2626 (validated miRTarBase) MIMAT0000255		0.75
validated miRTarBase	5441	1480	21566225	2664	hsa-miR-34a-5p	gene-gene-pos	+validated miRTarBase	0.75	21566225	false	gene-gene-pos	21566225	+validated miRTarBase	2664	GDI1	MIMAT0000255	hsa-miR-34a-5p	2664 (validated miRTarBase) MIMAT0000255		0.75
validated miRTarBase	5384	1480	21566225	25929	hsa-miR-34a-5p	gene-gene-pos	+validated miRTarBase	0.75	21566225	false	gene-gene-pos	21566225	+validated miRTarBase	25929	GEMIN5	MIMAT0000255	hsa-miR-34a-5p	25929 (validated miRTarBase) MIMAT0000255		0.75
validated miRTarBase	6461	1480	20371350	7485	hsa-miR-425-5p	gene-gene-pos	+validated miRTarBase	0.75	20371350	false	gene-gene-pos	20371350	+validated miRTarBase	7485	GET1	MIMAT0003393	hsa-miR-425-5p	7485 (validated miRTarBase) MIMAT0003393		0.75
validated miRTarBase	5444	1480	21566225	2673	hsa-miR-34a-5p	gene-gene-pos	+validated miRTarBase	0.75	21566225	false	gene-gene-pos	21566225	+validated miRTarBase	2673	GFPT1	MIMAT0000255	hsa-miR-34a-5p	2673 (validated miRTarBase) MIMAT0000255		0.75
validated miRTarBase	5408	1480	24374217	26088	hsa-miR-136-5p	gene-gene-pos	+validated miRTarBase	0.75	24374217	false	gene-gene-pos	24374217	+validated miRTarBase	26088	GGA1	MIMAT0000448	hsa-miR-136-5p	26088 (validated miRTarBase) MIMAT0000448		0.75
validated miRTarBase	5402	1480	21566225	26058	hsa-miR-34a-5p	gene-gene-pos	+validated miRTarBase	0.75	21566225	false	gene-gene-pos	21566225	+validated miRTarBase	26058	GIGYF2	MIMAT0000255	hsa-miR-34a-5p	26058 (validated miRTarBase) MIMAT0000255		0.75
validated miRTarBase	5471	1480	22100165	2764	hsa-miR-34a-5p	gene-gene-pos	+validated miRTarBase	0.75	22100165	false	gene-gene-pos	22100165	+validated miRTarBase	2764	GMFB	MIMAT0000255	hsa-miR-34a-5p	2764 (validated miRTarBase) MIMAT0000255		0.75
validated miRTarBase	6680	1480	19536157	8833	hsa-miR-136-5p	gene-gene-pos	+validated miRTarBase	0.75	19536157	false	gene-gene-pos	19536157	+validated miRTarBase	8833	GMPS	MIMAT0000448	hsa-miR-136-5p	8833 (validated miRTarBase) MIMAT0000448		0.75
validated miRTarBase	5474	1480	24374217	2778	hsa-miR-136-5p	gene-gene-pos	+validated miRTarBase	0.75	24374217	false	gene-gene-pos	24374217	+validated miRTarBase	2778	GNAS	MIMAT0000448	hsa-miR-136-5p	2778 (validated miRTarBase) MIMAT0000448		0.75
validated miRTarBase	4598	1480	23622248	10681	hsa-miR-425-5p	gene-gene-pos	+validated miRTarBase	0.75	23622248	false	gene-gene-pos	23622248	+validated miRTarBase	10681	GNB5	MIMAT0003393	hsa-miR-425-5p	10681 (validated miRTarBase) MIMAT0003393		0.75
validated miRTarBase	4378	1480	21566225	10007	hsa-miR-34a-5p	gene-gene-pos	+validated miRTarBase	0.75	21566225	false	gene-gene-pos	21566225	+validated miRTarBase	10007	GNPDA1	MIMAT0000255	hsa-miR-34a-5p	10007 (validated miRTarBase) MIMAT0000255		0.75
validated miRTarBase	5396	1480	21566225	26003	hsa-miR-34a-5p	gene-gene-pos	+validated miRTarBase	0.75	21566225	false	gene-gene-pos	21566225	+validated miRTarBase	26003	GORASP2	MIMAT0000255	hsa-miR-34a-5p	26003 (validated miRTarBase) MIMAT0000255		0.75
validated miRTarBase	5480	1480	21566225	2821	hsa-miR-34a-5p	gene-gene-pos	+validated miRTarBase	0.75	21566225	false	gene-gene-pos	21566225	+validated miRTarBase	2821	GPI	MIMAT0000255	hsa-miR-34a-5p	2821 (validated miRTarBase) MIMAT0000255		0.75
validated miRTarBase	4946	1480	23592263	165829	hsa-miR-34a-5p	gene-gene-pos	+validated miRTarBase	0.75	23592263	false	gene-gene-pos	23592263	+validated miRTarBase	165829	GPR156	MIMAT0000255	hsa-miR-34a-5p	165829 (validated miRTarBase) MIMAT0000255		0.75
validated miRTarBase	6206	1480	23824327	57512	hsa-miR-136-5p	gene-gene-pos	+validated miRTarBase	0.75	23824327	false	gene-gene-pos	23824327	+validated miRTarBase	57512	GPR158	MIMAT0000448	hsa-miR-136-5p	57512 (validated miRTarBase) MIMAT0000448		0.75
validated miRTarBase	5510	1480	20371350	2885	hsa-miR-34a-5p	gene-gene-pos	+validated miRTarBase	0.75	20371350	false	gene-gene-pos	20371350	+validated miRTarBase	2885	GRB2	MIMAT0000255	hsa-miR-34a-5p	2885 (validated miRTarBase) MIMAT0000255		0.75
validated miRTarBase	5558	1480	22815788	29841	hsa-miR-99b-5p	gene-gene-pos	+validated miRTarBase	0.75	22815788	false	gene-gene-pos	22815788	+validated miRTarBase	29841	GRHL1	MIMAT0000689	hsa-miR-99b-5p	29841 (validated miRTarBase) MIMAT0000689		0.75
validated miRTarBase	5519	1480	19536157	2903	hsa-miR-136-5p	gene-gene-pos	+validated miRTarBase	0.75	19536157	false	gene-gene-pos	19536157	+validated miRTarBase	2903	GRIN2A	MIMAT0000448	hsa-miR-136-5p	2903 (validated miRTarBase) MIMAT0000448		0.75
validated miRTarBase	5525	1480	23622248	2907	hsa-miR-34a-5p	gene-gene-pos	+validated miRTarBase	0.75	23622248	false	gene-gene-pos	23622248	+validated miRTarBase	2907	GRINA	MIMAT0000255	hsa-miR-34a-5p	2907 (validated miRTarBase) MIMAT0000255		0.75
validated miRTarBase	5540	1480	23622248	2932	hsa-miR-425-5p	gene-gene-pos	+validated miRTarBase	0.75	23622248	false	gene-gene-pos	23622248	+validated miRTarBase	2932	GSK3B	MIMAT0003393	hsa-miR-425-5p	2932 (validated miRTarBase) MIMAT0003393		0.75
validated miRTarBase	5546	1480	21566225	2975	hsa-miR-34a-5p	gene-gene-pos	+validated miRTarBase	0.75	21566225	false	gene-gene-pos	21566225	+validated miRTarBase	2975	GTF3C1	MIMAT0000255	hsa-miR-34a-5p	2975 (validated miRTarBase) MIMAT0000255		0.75
validated miRTarBase	5555	1480	23824327	2979	hsa-miR-136-5p	gene-gene-pos	+validated miRTarBase	0.75	23824327	false	gene-gene-pos	23824327	+validated miRTarBase	2979	GUCA1B	MIMAT0000448	hsa-miR-136-5p	2979 (validated miRTarBase) MIMAT0000448		0.75
validated miRTarBase	5573	1480	21566225	2992	hsa-miR-34a-5p	gene-gene-pos	+validated miRTarBase	0.75	21566225	false	gene-gene-pos	21566225	+validated miRTarBase	2992	GYG1	MIMAT0000255	hsa-miR-34a-5p	2992 (validated miRTarBase) MIMAT0000255		0.75
validated miRTarBase	5624	1480	21566225	3024	hsa-miR-34a-5p	gene-gene-pos	+validated miRTarBase	0.75	21566225	false	gene-gene-pos	21566225	+validated miRTarBase	3024	H1-1	MIMAT0000255	hsa-miR-34a-5p	3024 (validated miRTarBase) MIMAT0000255		0.75
validated miRTarBase	5591	8404.05	21566225	3006	hsa-miR-34a-5p	gene-gene-pos	+validated miRTarBase	0.75	21566225	false	gene-gene-pos	21566225	+validated miRTarBase	3006	H1-2	MIMAT0000255	hsa-miR-34a-5p	3006 (validated miRTarBase) MIMAT0000255		0.75
validated miRTarBase	5594	7216.48	23622248	3006	hsa-miR-99b-5p	gene-gene-pos	+validated miRTarBase	0.75	23622248	false	gene-gene-pos	23622248	+validated miRTarBase	3006	H1-2	MIMAT0000689	hsa-miR-99b-5p	3006 (validated miRTarBase) MIMAT0000689		0.75
validated miRTarBase	5597	1480	21566225	3007	hsa-miR-34a-5p	gene-gene-pos	+validated miRTarBase	0.75	21566225	false	gene-gene-pos	21566225	+validated miRTarBase	3007	H1-3	MIMAT0000255	hsa-miR-34a-5p	3007 (validated miRTarBase) MIMAT0000255		0.75
validated miRTarBase	5600	1480	21566225	3008	hsa-miR-34a-5p	gene-gene-pos	+validated miRTarBase	0.75	21566225	false	gene-gene-pos	21566225	+validated miRTarBase	3008	H1-4	MIMAT0000255	hsa-miR-34a-5p	3008 (validated miRTarBase) MIMAT0000255		0.75
validated miRTarBase	5603	1480	21566225	3009	hsa-miR-34a-5p	gene-gene-pos	+validated miRTarBase	0.75	21566225	false	gene-gene-pos	21566225	+validated miRTarBase	3009	H1-5	MIMAT0000255	hsa-miR-34a-5p	3009 (validated miRTarBase) MIMAT0000255		0.75
validated miRTarBase	5105	1480	21566225	221613	hsa-miR-34a-5p	gene-gene-pos	+validated miRTarBase	0.75	21566225	false	gene-gene-pos	21566225	+validated miRTarBase	221613	H2AC1	MIMAT0000255	hsa-miR-34a-5p	221613 (validated miRTarBase) MIMAT0000255		0.75
validated miRTarBase	6578	10032.9	21566225	8338	hsa-miR-34a-5p	gene-gene-pos	+validated miRTarBase	0.75	21566225	false	gene-gene-pos	21566225	+validated miRTarBase	8338	H2AC20	MIMAT0000255	hsa-miR-34a-5p	8338 (validated miRTarBase) MIMAT0000255		0.75
validated miRTarBase	6581	9103.23	23446348	8338	hsa-miR-133a-3p	gene-gene-pos	+validated miRTarBase	0.75	23446348	false	gene-gene-pos	23446348	+validated miRTarBase	8338	H2AC20	MIMAT0000427	hsa-miR-133a	8338 (validated miRTarBase) MIMAT0000427		0.75
validated miRTarBase	5660	1480	21566225	317772	hsa-miR-34a-5p	gene-gene-pos	+validated miRTarBase	0.75	21566225	false	gene-gene-pos	21566225	+validated miRTarBase	317772	H2AC21	MIMAT0000255	hsa-miR-34a-5p	317772 (validated miRTarBase) MIMAT0000255		0.75
validated miRTarBase	5609	1480	21566225	3013	hsa-miR-34a-5p	gene-gene-pos	+validated miRTarBase	0.75	21566225	false	gene-gene-pos	21566225	+validated miRTarBase	3013	H2AC7	MIMAT0000255	hsa-miR-34a-5p	3013 (validated miRTarBase) MIMAT0000255		0.75
validated miRTarBase	5606	1480	21566225	3012	hsa-miR-34a-5p	gene-gene-pos	+validated miRTarBase	0.75	21566225	false	gene-gene-pos	21566225	+validated miRTarBase	3012	H2AC8	MIMAT0000255	hsa-miR-34a-5p	3012 (validated miRTarBase) MIMAT0000255		0.75
validated miRTarBase	5612	1480	23622248	3015	hsa-miR-99b-5p	gene-gene-pos	+validated miRTarBase	0.75	23622248	false	gene-gene-pos	23622248	+validated miRTarBase	3015	H2AZ1	MIMAT0000689	hsa-miR-99b-5p	3015 (validated miRTarBase) MIMAT0000689		0.75
validated miRTarBase	6740	1480	24374217	94239	hsa-miR-136-5p	gene-gene-pos	+validated miRTarBase	0.75	24374217	false	gene-gene-pos	24374217	+validated miRTarBase	94239	H2AZ2	MIMAT0000448	hsa-miR-136-5p	94239 (validated miRTarBase) MIMAT0000448		0.75
validated miRTarBase	5351	1480	21566225	255626	hsa-miR-34a-5p	gene-gene-pos	+validated miRTarBase	0.75	21566225	false	gene-gene-pos	21566225	+validated miRTarBase	255626	H2BC1	MIMAT0000255	hsa-miR-34a-5p	255626 (validated miRTarBase) MIMAT0000255		0.75
validated miRTarBase	5615	1480	21566225	3018	hsa-miR-34a-5p	gene-gene-pos	+validated miRTarBase	0.75	21566225	false	gene-gene-pos	21566225	+validated miRTarBase	3018	H2BC3	MIMAT0000255	hsa-miR-34a-5p	3018 (validated miRTarBase) MIMAT0000255		0.75
validated miRTarBase	4808	1480	21566225	128312	hsa-miR-34a-5p	gene-gene-pos	+validated miRTarBase	0.75	21566225	false	gene-gene-pos	21566225	+validated miRTarBase	128312	H2BU1	MIMAT0000255	hsa-miR-34a-5p	128312 (validated miRTarBase) MIMAT0000255		0.75
validated miRTarBase	5618	1480	21566225|23622248	3020	hsa-miR-34a-5p	gene-gene-pos	+validated miRTarBase	0.75	21566225|23622248	false	gene-gene-pos	21566225|23622248	+validated miRTarBase	3020	H3-3A	MIMAT0000255	hsa-miR-34a-5p	3020 (validated miRTarBase) MIMAT0000255		0.75
validated miRTarBase	5621	1480	21566225	3021	hsa-miR-34a-5p	gene-gene-pos	+validated miRTarBase	0.75	21566225	false	gene-gene-pos	21566225	+validated miRTarBase	3021	H3-3B	MIMAT0000255	hsa-miR-34a-5p	3021 (validated miRTarBase) MIMAT0000255		0.75
validated miRTarBase	4802	1480	21566225	126961	hsa-miR-34a-5p	gene-gene-pos	+validated miRTarBase	0.75	21566225	false	gene-gene-pos	21566225	+validated miRTarBase	126961	H3C14	MIMAT0000255	hsa-miR-34a-5p	126961 (validated miRTarBase) MIMAT0000255		0.75
validated miRTarBase	5696	1480	21566225	333932	hsa-miR-34a-5p	gene-gene-pos	+validated miRTarBase	0.75	21566225	false	gene-gene-pos	21566225	+validated miRTarBase	333932	H3C15	MIMAT0000255	hsa-miR-34a-5p	333932 (validated miRTarBase) MIMAT0000255		0.75
validated miRTarBase	4778	1480	21566225	121504	hsa-miR-34a-5p	gene-gene-pos	+validated miRTarBase	0.75	21566225	false	gene-gene-pos	21566225	+validated miRTarBase	121504	H4-16	MIMAT0000255	hsa-miR-34a-5p	121504 (validated miRTarBase) MIMAT0000255		0.75
validated miRTarBase	5636	1480	21566225	3069	hsa-miR-34a-5p	gene-gene-pos	+validated miRTarBase	0.75	21566225	false	gene-gene-pos	21566225	+validated miRTarBase	3069	HDLBP	MIMAT0000255	hsa-miR-34a-5p	3069 (validated miRTarBase) MIMAT0000255		0.75
validated miRTarBase	4655	1480	21566225	11112	hsa-miR-34a-5p	gene-gene-pos	+validated miRTarBase	0.75	21566225	false	gene-gene-pos	21566225	+validated miRTarBase	11112	HIBADH	MIMAT0000255	hsa-miR-34a-5p	11112 (validated miRTarBase) MIMAT0000255		0.75
validated miRTarBase	5645	1480	24374217	3097	hsa-miR-136-5p	gene-gene-pos	+validated miRTarBase	0.75	24374217	false	gene-gene-pos	24374217	+validated miRTarBase	3097	HIVEP2	MIMAT0000448	hsa-miR-136-5p	3097 (validated miRTarBase) MIMAT0000448		0.75
validated miRTarBase	5648	1480	23622248	3098	hsa-miR-99b-5p	gene-gene-pos	+validated miRTarBase	0.75	23622248	false	gene-gene-pos	23622248	+validated miRTarBase	3098	HK1	MIMAT0000689	hsa-miR-99b-5p	3098 (validated miRTarBase) MIMAT0000689		0.75
validated miRTarBase	5651	1480	19536157	3127	hsa-miR-136-5p	gene-gene-pos	+validated miRTarBase	0.75	19536157	false	gene-gene-pos	19536157	+validated miRTarBase	3127	HLA-DRB5	MIMAT0000448	hsa-miR-136-5p	3127 (validated miRTarBase) MIMAT0000448		0.75
validated miRTarBase	4652	1480	21566225	11100	hsa-miR-34a-5p	gene-gene-pos	+validated miRTarBase	0.75	21566225	false	gene-gene-pos	21566225	+validated miRTarBase	11100	HNRNPUL1	MIMAT0000255	hsa-miR-34a-5p	11100 (validated miRTarBase) MIMAT0000255		0.75
validated miRTarBase	5666	1480	21572407	3209	hsa-miR-34a-5p	gene-gene-pos	+validated miRTarBase	0.75	21572407	false	gene-gene-pos	21572407	+validated miRTarBase	3209	HOXA13	MIMAT0000255	hsa-miR-34a-5p	3209 (validated miRTarBase) MIMAT0000255		0.75
validated miRTarBase	5663	1480	23622248	3200	hsa-miR-99b-5p	gene-gene-pos	+validated miRTarBase	0.75	23622248	false	gene-gene-pos	23622248	+validated miRTarBase	3200	HOXA3	MIMAT0000689	hsa-miR-99b-5p	3200 (validated miRTarBase) MIMAT0000689		0.75
validated miRTarBase	5669	1480	20371350	3218	hsa-miR-34a-5p	gene-gene-pos	+validated miRTarBase	0.75	20371350	false	gene-gene-pos	20371350	+validated miRTarBase	3218	HOXB8	MIMAT0000255	hsa-miR-34a-5p	3218 (validated miRTarBase) MIMAT0000255		0.75
validated miRTarBase	5627	1480	20371350	3028	hsa-miR-34a-5p	gene-gene-pos	+validated miRTarBase	0.75	20371350	false	gene-gene-pos	20371350	+validated miRTarBase	3028	HSD17B10	MIMAT0000255	hsa-miR-34a-5p	3028 (validated miRTarBase) MIMAT0000255		0.75
validated miRTarBase	5687	1480	23622248	3320	hsa-miR-425-5p	gene-gene-pos	+validated miRTarBase	0.75	23622248	false	gene-gene-pos	23622248	+validated miRTarBase	3320	HSP90AA1	MIMAT0003393	hsa-miR-425-5p	3320 (validated miRTarBase) MIMAT0003393		0.75
validated miRTarBase	5678	1480	21566225	3303	hsa-miR-34a-5p	gene-gene-pos	+validated miRTarBase	0.75	21566225	false	gene-gene-pos	21566225	+validated miRTarBase	3303	HSPA1A	MIMAT0000255	hsa-miR-34a-5p	3303 (validated miRTarBase) MIMAT0000255		0.75
validated miRTarBase	5681	1480	20371350|21566225	3304	hsa-miR-34a-5p	gene-gene-pos	+validated miRTarBase	0.75	20371350|21566225	false	gene-gene-pos	20371350|21566225	+validated miRTarBase	3304	HSPA1B	MIMAT0000255	hsa-miR-34a-5p	3304 (validated miRTarBase) MIMAT0000255		0.75
validated miRTarBase	4417	1480	21566225	10075	hsa-miR-34a-5p	gene-gene-pos	+validated miRTarBase	0.75	21566225	false	gene-gene-pos	21566225	+validated miRTarBase	10075	HUWE1	MIMAT0000255	hsa-miR-34a-5p	10075 (validated miRTarBase) MIMAT0000255		0.75
validated miRTarBase	5048	1480	21572407	200205	hsa-miR-133a-3p	gene-gene-pos	+validated miRTarBase	0.75	21572407	false	gene-gene-pos	21572407	+validated miRTarBase	200205	IBA57	MIMAT0000427	hsa-miR-133a	200205 (validated miRTarBase) MIMAT0000427		0.75
validated miRTarBase	4814	1480	23824327	130026	hsa-miR-136-5p	gene-gene-pos	+validated miRTarBase	0.75	23824327	false	gene-gene-pos	23824327	+validated miRTarBase	130026	ICA1L	MIMAT0000448	hsa-miR-136-5p	130026 (validated miRTarBase) MIMAT0000448		0.75
validated miRTarBase	4937	1480	23592263	163702	hsa-miR-34a-5p	gene-gene-pos	+validated miRTarBase	0.75	23592263	false	gene-gene-pos	23592263	+validated miRTarBase	163702	IFNLR1	MIMAT0000255	hsa-miR-34a-5p	163702 (validated miRTarBase) MIMAT0000255		0.75
validated miRTarBase	5717	10032.9	23622248	3480	hsa-miR-34a-5p	gene-gene-pos	+validated miRTarBase	0.75	23622248	false	gene-gene-pos	23622248	+validated miRTarBase	3480	IGF1R	MIMAT0000255	hsa-miR-34a-5p	3480 (validated miRTarBase) MIMAT0000255		0.75
validated miRTarBase	4583	1480	23622248	10642	hsa-miR-99b-5p	gene-gene-pos	+validated miRTarBase	0.75	23622248	false	gene-gene-pos	23622248	+validated miRTarBase	10642	IGF2BP1	MIMAT0000689	hsa-miR-99b-5p	10642 (validated miRTarBase) MIMAT0000689		0.75
validated miRTarBase	4586	1480	21566225	10643	hsa-miR-34a-5p	gene-gene-pos	+validated miRTarBase	0.75	21566225	false	gene-gene-pos	21566225	+validated miRTarBase	10643	IGF2BP3	MIMAT0000255	hsa-miR-34a-5p	10643 (validated miRTarBase) MIMAT0000255		0.75
validated miRTarBase	5729	1480	23622248	3547	hsa-miR-425-5p	gene-gene-pos	+validated miRTarBase	0.75	23622248	false	gene-gene-pos	23622248	+validated miRTarBase	3547	IGSF1	MIMAT0003393	hsa-miR-425-5p	3547 (validated miRTarBase) MIMAT0003393		0.75
validated miRTarBase	5732	1480	21566225	3550	hsa-miR-34a-5p	gene-gene-pos	+validated miRTarBase	0.75	21566225	false	gene-gene-pos	21566225	+validated miRTarBase	3550	IK	MIMAT0000255	hsa-miR-34a-5p	3550 (validated miRTarBase) MIMAT0000255		0.75
validated miRTarBase	4637	1480	21566225	10989	hsa-miR-34a-5p	gene-gene-pos	+validated miRTarBase	0.75	21566225	false	gene-gene-pos	21566225	+validated miRTarBase	10989	IMMT	MIMAT0000255	hsa-miR-34a-5p	10989 (validated miRTarBase) MIMAT0000255		0.75
validated miRTarBase	5744	1480	21566225	3614	hsa-miR-34a-5p	gene-gene-pos	+validated miRTarBase	0.75	21566225	false	gene-gene-pos	21566225	+validated miRTarBase	3614	IMPDH1	MIMAT0000255	hsa-miR-34a-5p	3614 (validated miRTarBase) MIMAT0000255		0.75
validated miRTarBase	5750	1480	19536157	3619	hsa-miR-24-1-5p	gene-gene-pos	+validated miRTarBase	0.75	19536157	false	gene-gene-pos	19536157	+validated miRTarBase	3619	INCENP	MIMAT0000079	hsa-miR-24-1-5p	3619 (validated miRTarBase) MIMAT0000079		0.75
validated miRTarBase	6176	1480	23622248	56623	hsa-miR-425-5p	gene-gene-pos	+validated miRTarBase	0.75	23622248	false	gene-gene-pos	23622248	+validated miRTarBase	56623	INPP5E	MIMAT0003393	hsa-miR-425-5p	56623 (validated miRTarBase) MIMAT0003393		0.75
validated miRTarBase	4390	1480	19536157	100131897	hsa-miR-425-5p	gene-gene-pos	+validated miRTarBase	0.75	19536157	false	gene-gene-pos	19536157	+validated miRTarBase	100131897	INSYN2B	MIMAT0003393	hsa-miR-425-5p	100131897 (validated miRTarBase) MIMAT0003393		0.75
validated miRTarBase	6779	1480	23824327	9807	hsa-miR-133a-3p	gene-gene-pos	+validated miRTarBase	0.75	23824327	false	gene-gene-pos	23824327	+validated miRTarBase	9807	IP6K1	MIMAT0000427	hsa-miR-133a	9807 (validated miRTarBase) MIMAT0000427		0.75
validated miRTarBase	4796	1480	21566225	126298	hsa-miR-34a-5p	gene-gene-pos	+validated miRTarBase	0.75	21566225	false	gene-gene-pos	21566225	+validated miRTarBase	126298	IRGQ	MIMAT0000255	hsa-miR-34a-5p	126298 (validated miRTarBase) MIMAT0000255		0.75
validated miRTarBase	5120	1480	23313552|24906430	22801	hsa-miR-34a-5p	gene-gene-pos	+validated miRTarBase	0.75	23313552|24906430	false	gene-gene-pos	23313552|24906430	+validated miRTarBase	22801	ITGA11	MIMAT0000255	hsa-miR-34a-5p	22801 (validated miRTarBase) MIMAT0000255		0.75
validated miRTarBase	5756	1480	21566225	3655	hsa-miR-34a-5p	gene-gene-pos	+validated miRTarBase	0.75	21566225	false	gene-gene-pos	21566225	+validated miRTarBase	3655	ITGA6	MIMAT0000255	hsa-miR-34a-5p	3655 (validated miRTarBase) MIMAT0000255		0.75
validated miRTarBase	5762	1480	23824327	3690	hsa-miR-34a-5p	gene-gene-pos	+validated miRTarBase	0.75	23824327	false	gene-gene-pos	23824327	+validated miRTarBase	3690	ITGB3	MIMAT0000255	hsa-miR-34a-5p	3690 (validated miRTarBase) MIMAT0000255		0.75
validated miRTarBase	5765	1480	23824327	3707	hsa-miR-133a-3p	gene-gene-pos	+validated miRTarBase	0.75	23824327	false	gene-gene-pos	23824327	+validated miRTarBase	3707	ITPKB	MIMAT0000427	hsa-miR-133a	3707 (validated miRTarBase) MIMAT0000427		0.75
validated miRTarBase	5768	1480	23313552	3720	hsa-miR-34a-5p	gene-gene-pos	+validated miRTarBase	0.75	23313552	false	gene-gene-pos	23313552	+validated miRTarBase	3720	JARID2	MIMAT0000255	hsa-miR-34a-5p	3720 (validated miRTarBase) MIMAT0000255		0.75
validated miRTarBase	6524	1480	20371350	7994	hsa-miR-425-5p	gene-gene-pos	+validated miRTarBase	0.75	20371350	false	gene-gene-pos	20371350	+validated miRTarBase	7994	KAT6A	MIMAT0003393	hsa-miR-425-5p	7994 (validated miRTarBase) MIMAT0003393		0.75
validated miRTarBase	6611	1480	21572407|22012620|23446348	84541	hsa-miR-99b-5p	gene-gene-pos	+validated miRTarBase	0.75	21572407|22012620|23446348	false	gene-gene-pos	21572407|22012620|23446348	+validated miRTarBase	84541	KBTBD8	MIMAT0000689	hsa-miR-99b-5p	84541 (validated miRTarBase) MIMAT0000689		0.75
validated miRTarBase	5771	1480	19536157	3748	hsa-miR-136-5p	gene-gene-pos	+validated miRTarBase	0.75	19536157	false	gene-gene-pos	19536157	+validated miRTarBase	3748	KCNC3	MIMAT0000448	hsa-miR-136-5p	3748 (validated miRTarBase) MIMAT0000448		0.75
validated miRTarBase	6239	1480	24374217	5927	hsa-miR-136-5p	gene-gene-pos	+validated miRTarBase	0.75	24374217	false	gene-gene-pos	24374217	+validated miRTarBase	5927	KDM5A	MIMAT0000448	hsa-miR-136-5p	5927 (validated miRTarBase) MIMAT0000448		0.75
validated miRTarBase	4589	1480	23622248	10657	hsa-miR-34a-5p	gene-gene-pos	+validated miRTarBase	0.75	23622248	false	gene-gene-pos	23622248	+validated miRTarBase	10657	KHDRBS1	MIMAT0000255	hsa-miR-34a-5p	10657 (validated miRTarBase) MIMAT0000255		0.75
validated miRTarBase	5813	1480	21566225	3832	hsa-miR-34a-5p	gene-gene-pos	+validated miRTarBase	0.75	21566225	false	gene-gene-pos	21566225	+validated miRTarBase	3832	KIF11	MIMAT0000255	hsa-miR-34a-5p	3832 (validated miRTarBase) MIMAT0000255		0.75
validated miRTarBase	5798	1480	21566225	3796	hsa-miR-34a-5p	gene-gene-pos	+validated miRTarBase	0.75	21566225	false	gene-gene-pos	21566225	+validated miRTarBase	3796	KIF2A	MIMAT0000255	hsa-miR-34a-5p	3796 (validated miRTarBase) MIMAT0000255		0.75
validated miRTarBase	4640	1480	21566225	11004	hsa-miR-34a-5p	gene-gene-pos	+validated miRTarBase	0.75	21566225	false	gene-gene-pos	21566225	+validated miRTarBase	11004	KIF2C	MIMAT0000255	hsa-miR-34a-5p	11004 (validated miRTarBase) MIMAT0000255		0.75
validated miRTarBase	5318	1480	21566225	24137	hsa-miR-34a-5p	gene-gene-pos	+validated miRTarBase	0.75	21566225	false	gene-gene-pos	21566225	+validated miRTarBase	24137	KIF4A	MIMAT0000255	hsa-miR-34a-5p	24137 (validated miRTarBase) MIMAT0000255		0.75
validated miRTarBase	5801	1480	21566225	3799	hsa-miR-34a-5p	gene-gene-pos	+validated miRTarBase	0.75	21566225	false	gene-gene-pos	21566225	+validated miRTarBase	3799	KIF5B	MIMAT0000255	hsa-miR-34a-5p	3799 (validated miRTarBase) MIMAT0000255		0.75
validated miRTarBase	5138	1480	23622248	22920	hsa-miR-425-5p	gene-gene-pos	+validated miRTarBase	0.75	23622248	false	gene-gene-pos	23622248	+validated miRTarBase	22920	KIFAP3	MIMAT0003393	hsa-miR-425-5p	22920 (validated miRTarBase) MIMAT0003393		0.75
validated miRTarBase	5810	1480	21566225	3831	hsa-miR-34a-5p	gene-gene-pos	+validated miRTarBase	0.75	21566225	false	gene-gene-pos	21566225	+validated miRTarBase	3831	KLC1	MIMAT0000255	hsa-miR-34a-5p	3831 (validated miRTarBase) MIMAT0000255		0.75
validated miRTarBase	5816	1480	21566225	3836	hsa-miR-34a-5p	gene-gene-pos	+validated miRTarBase	0.75	21566225	false	gene-gene-pos	21566225	+validated miRTarBase	3836	KPNA1	MIMAT0000255	hsa-miR-34a-5p	3836 (validated miRTarBase) MIMAT0000255		0.75
validated miRTarBase	5822	1480	19378336	3855	hsa-miR-133a-3p	gene-gene-pos	+validated miRTarBase	0.75	19378336	false	gene-gene-pos	19378336	+validated miRTarBase	3855	KRT7	MIMAT0000427	hsa-miR-133a	3855 (validated miRTarBase) MIMAT0000427		0.75
validated miRTarBase	5828	1480	21566225	3895	hsa-miR-34a-5p	gene-gene-pos	+validated miRTarBase	0.75	21566225	false	gene-gene-pos	21566225	+validated miRTarBase	3895	KTN1	MIMAT0000255	hsa-miR-34a-5p	3895 (validated miRTarBase) MIMAT0000255		0.75
validated miRTarBase	6656	1480	24374217	8649	hsa-miR-136-5p	gene-gene-pos	+validated miRTarBase	0.75	24374217	false	gene-gene-pos	24374217	+validated miRTarBase	8649	LAMTOR3	MIMAT0000448	hsa-miR-136-5p	8649 (validated miRTarBase) MIMAT0000448		0.75
validated miRTarBase	5243	1480	21566225	23367	hsa-miR-34a-5p	gene-gene-pos	+validated miRTarBase	0.75	21566225	false	gene-gene-pos	21566225	+validated miRTarBase	23367	LARP1	MIMAT0000255	hsa-miR-34a-5p	23367 (validated miRTarBase) MIMAT0000255		0.75
validated miRTarBase	6608	1480	20371350|21572407	84458	hsa-miR-425-5p	gene-gene-pos	+validated miRTarBase	0.75	20371350|21572407	false	gene-gene-pos	20371350|21572407	+validated miRTarBase	84458	LCOR	MIMAT0003393	hsa-miR-425-5p	84458 (validated miRTarBase) MIMAT0003393		0.75
validated miRTarBase	5852	8565.12	23592263	3939	hsa-miR-425-5p	gene-gene-pos	+validated miRTarBase	0.75	23592263	false	gene-gene-pos	23592263	+validated miRTarBase	3939	LDHA	MIMAT0003393	hsa-miR-425-5p	3939 (validated miRTarBase) MIMAT0003393		0.75
validated miRTarBase	5039	1480	22012620	197257	hsa-miR-425-5p	gene-gene-pos	+validated miRTarBase	0.75	22012620	false	gene-gene-pos	22012620	+validated miRTarBase	197257	LDHD	MIMAT0003393	hsa-miR-425-5p	197257 (validated miRTarBase) MIMAT0003393		0.75
validated miRTarBase	5855	1480	24374217	3964	hsa-miR-136-5p	gene-gene-pos	+validated miRTarBase	0.75	24374217	false	gene-gene-pos	24374217	+validated miRTarBase	3964	LGALS8	MIMAT0000448	hsa-miR-136-5p	3964 (validated miRTarBase) MIMAT0000448		0.75
validated miRTarBase	6014	1480	19536157	51557	hsa-miR-136-5p	gene-gene-pos	+validated miRTarBase	0.75	19536157	false	gene-gene-pos	19536157	+validated miRTarBase	51557	LGSN	MIMAT0000448	hsa-miR-136-5p	51557 (validated miRTarBase) MIMAT0000448		0.75
validated miRTarBase	6629	1480	23622248	84918	hsa-miR-425-5p	gene-gene-pos	+validated miRTarBase	0.75	23622248	false	gene-gene-pos	23622248	+validated miRTarBase	84918	LRP11	MIMAT0003393	hsa-miR-425-5p	84918 (validated miRTarBase) MIMAT0003393		0.75
validated miRTarBase	4784	1480	23622248	123355	hsa-miR-34a-5p	gene-gene-pos	+validated miRTarBase	0.75	23622248	false	gene-gene-pos	23622248	+validated miRTarBase	123355	LRRC28	MIMAT0000255	hsa-miR-34a-5p	123355 (validated miRTarBase) MIMAT0000255		0.75
validated miRTarBase	6128	9303.39	21566225	55631	hsa-miR-34a-5p	gene-gene-pos	+validated miRTarBase	0.75	21566225	false	gene-gene-pos	21566225	+validated miRTarBase	55631	LRRC40	MIMAT0000255	hsa-miR-34a-5p	55631 (validated miRTarBase) MIMAT0000255		0.75
validated miRTarBase	6131	8565.12	20371350	55631	hsa-miR-425-5p	gene-gene-pos	+validated miRTarBase	0.75	20371350	false	gene-gene-pos	20371350	+validated miRTarBase	55631	LRRC40	MIMAT0003393	hsa-miR-425-5p	55631 (validated miRTarBase) MIMAT0003393		0.75
validated miRTarBase	6470	1480	24374217	767558	hsa-miR-136-5p	gene-gene-pos	+validated miRTarBase	0.75	24374217	false	gene-gene-pos	24374217	+validated miRTarBase	767558	LUZP6	MIMAT0000448	hsa-miR-136-5p	767558 (validated miRTarBase) MIMAT0000448		0.75
validated miRTarBase	6704	1480	19536157	90624	hsa-miR-136-5p	gene-gene-pos	+validated miRTarBase	0.75	19536157	false	gene-gene-pos	19536157	+validated miRTarBase	90624	LYRM7	MIMAT0000448	hsa-miR-136-5p	90624 (validated miRTarBase) MIMAT0000448		0.75
validated miRTarBase	6650	1480	24374217	8567	hsa-miR-136-5p	gene-gene-pos	+validated miRTarBase	0.75	24374217	false	gene-gene-pos	24374217	+validated miRTarBase	8567	MADD	MIMAT0000448	hsa-miR-136-5p	8567 (validated miRTarBase) MIMAT0000448		0.75
validated miRTarBase	6170	1480	20371350	5608	hsa-miR-425-5p	gene-gene-pos	+validated miRTarBase	0.75	20371350	false	gene-gene-pos	20371350	+validated miRTarBase	5608	MAP2K6	MIMAT0003393	hsa-miR-425-5p	5608 (validated miRTarBase) MIMAT0003393		0.75
validated miRTarBase	5903	1480	21572407	4217	hsa-miR-425-5p	gene-gene-pos	+validated miRTarBase	0.75	21572407	false	gene-gene-pos	21572407	+validated miRTarBase	4217	MAP3K5	MIMAT0003393	hsa-miR-425-5p	4217 (validated miRTarBase) MIMAT0003393		0.75
validated miRTarBase	5156	1480	22291592	23031	hsa-miR-34a-5p	gene-gene-pos	+validated miRTarBase	0.75	22291592	false	gene-gene-pos	22291592	+validated miRTarBase	23031	MAST3	MIMAT0000255	hsa-miR-34a-5p	23031 (validated miRTarBase) MIMAT0000255		0.75
validated miRTarBase	4736	1480	23592263	114785	hsa-miR-34a-5p	gene-gene-pos	+validated miRTarBase	0.75	23592263	false	gene-gene-pos	23592263	+validated miRTarBase	114785	MBD6	MIMAT0000255	hsa-miR-34a-5p	114785 (validated miRTarBase) MIMAT0000255		0.75
validated miRTarBase	5885	1480	23446348	4158	hsa-miR-133a-3p	gene-gene-pos	+validated miRTarBase	0.75	23446348	false	gene-gene-pos	23446348	+validated miRTarBase	4158	MC2R	MIMAT0000427	hsa-miR-133a	4158 (validated miRTarBase) MIMAT0000427		0.75
validated miRTarBase	5891	8404.05	21566225	4172	hsa-miR-34a-5p	gene-gene-pos	+validated miRTarBase	0.75	21566225	false	gene-gene-pos	21566225	+validated miRTarBase	4172	MCM3	MIMAT0000255	hsa-miR-34a-5p	4172 (validated miRTarBase) MIMAT0000255		0.75
validated miRTarBase	5894	7216.48	23622248	4172	hsa-miR-99b-5p	gene-gene-pos	+validated miRTarBase	0.75	23622248	false	gene-gene-pos	23622248	+validated miRTarBase	4172	MCM3	MIMAT0000689	hsa-miR-99b-5p	4172 (validated miRTarBase) MIMAT0000689		0.75
validated miRTarBase	6698	1480	23824327	90550	hsa-miR-136-5p	gene-gene-pos	+validated miRTarBase	0.75	23824327	false	gene-gene-pos	23824327	+validated miRTarBase	90550	MCU	MIMAT0000448	hsa-miR-136-5p	90550 (validated miRTarBase) MIMAT0000448		0.75
validated miRTarBase	5897	1480	23706177	4193	hsa-miR-425-5p	gene-gene-pos	+validated miRTarBase	0.75	23706177	false	gene-gene-pos	23706177	+validated miRTarBase	4193	MDM2	MIMAT0003393	hsa-miR-425-5p	4193 (validated miRTarBase) MIMAT0003393		0.75
validated miRTarBase	6398	1480	23622248	6837	hsa-miR-425-5p	gene-gene-pos	+validated miRTarBase	0.75	23622248	false	gene-gene-pos	23622248	+validated miRTarBase	6837	MED22	MIMAT0003393	hsa-miR-425-5p	6837 (validated miRTarBase) MIMAT0003393		0.75
validated miRTarBase	5522	1480	20371350	29079	hsa-miR-425-5p	gene-gene-pos	+validated miRTarBase	0.75	20371350	false	gene-gene-pos	20371350	+validated miRTarBase	29079	MED4	MIMAT0003393	hsa-miR-425-5p	29079 (validated miRTarBase) MIMAT0003393		0.75
validated miRTarBase	5192	1480	20371350	23173	hsa-miR-34a-5p	gene-gene-pos	+validated miRTarBase	0.75	20371350	false	gene-gene-pos	20371350	+validated miRTarBase	23173	METAP1	MIMAT0000255	hsa-miR-34a-5p	23173 (validated miRTarBase) MIMAT0000255		0.75
validated miRTarBase	5912	1480	23824327	4234	hsa-miR-136-5p	gene-gene-pos	+validated miRTarBase	0.75	23824327	false	gene-gene-pos	23824327	+validated miRTarBase	4234	METTL1	MIMAT0000448	hsa-miR-136-5p	4234 (validated miRTarBase) MIMAT0000448		0.75
validated miRTarBase	6794	8404.05	23622248	9927	hsa-miR-34a-5p	gene-gene-pos	+validated miRTarBase	0.75	23622248	false	gene-gene-pos	23622248	+validated miRTarBase	9927	MFN2	MIMAT0000255	hsa-miR-34a-5p	9927 (validated miRTarBase) MIMAT0000255		0.75
validated miRTarBase	6797	7216.48	23622248	9927	hsa-miR-99b-5p	gene-gene-pos	+validated miRTarBase	0.75	23622248	false	gene-gene-pos	23622248	+validated miRTarBase	9927	MFN2	MIMAT0000689	hsa-miR-99b-5p	9927 (validated miRTarBase) MIMAT0000689		0.75
validated miRTarBase	5360	1480	22100165	256471	hsa-miR-34a-5p	gene-gene-pos	+validated miRTarBase	0.75	22100165	false	gene-gene-pos	22100165	+validated miRTarBase	256471	MFSD8	MIMAT0000255	hsa-miR-34a-5p	256471 (validated miRTarBase) MIMAT0000255		0.75
validated miRTarBase	6695	1480	20371350	90007	hsa-miR-425-5p	gene-gene-pos	+validated miRTarBase	0.75	20371350	false	gene-gene-pos	20371350	+validated miRTarBase	90007	MIDN	MIMAT0003393	hsa-miR-425-5p	90007 (validated miRTarBase) MIMAT0003393		0.75
validated miRTarBase	5774	1480	21572407	374986	hsa-miR-34a-5p	gene-gene-pos	+validated miRTarBase	0.75	21572407	false	gene-gene-pos	21572407	+validated miRTarBase	374986	MIGA1	MIMAT0000255	hsa-miR-34a-5p	374986 (validated miRTarBase) MIMAT0000255		0.75
validated miRTarBase	4820	1480	21572407	131076	hsa-miR-136-5p	gene-gene-pos	+validated miRTarBase	0.75	21572407	false	gene-gene-pos	21572407	+validated miRTarBase	131076	MIX23	MIMAT0000448	hsa-miR-136-5p	131076 (validated miRTarBase) MIMAT0000448		0.75
validated miRTarBase	5507	1480	23592263	2872	hsa-miR-34a-5p	gene-gene-pos	+validated miRTarBase	0.75	23592263	false	gene-gene-pos	23592263	+validated miRTarBase	2872	MKNK2	MIMAT0000255	hsa-miR-34a-5p	2872 (validated miRTarBase) MIMAT0000255		0.75
validated miRTarBase	6773	1480	23313552	9761	hsa-miR-133a-3p	gene-gene-pos	+validated miRTarBase	0.75	23313552	false	gene-gene-pos	23313552	+validated miRTarBase	9761	MLEC	MIMAT0000427	hsa-miR-133a	9761 (validated miRTarBase) MIMAT0000427		0.75
validated miRTarBase	6104	1480	20371350	55167	hsa-miR-136-5p	gene-gene-pos	+validated miRTarBase	0.75	20371350	false	gene-gene-pos	20371350	+validated miRTarBase	55167	MSL2	MIMAT0000448	hsa-miR-136-5p	55167 (validated miRTarBase) MIMAT0000448		0.75
validated miRTarBase	6722	10743.4	20371350	92140	hsa-miR-34a-5p	gene-gene-pos	+validated miRTarBase	0.75	20371350	false	gene-gene-pos	20371350	+validated miRTarBase	92140	MTDH	MIMAT0000255	hsa-miR-34a-5p	92140 (validated miRTarBase) MIMAT0000255		0.75
validated miRTarBase	6707	1480	24374217	9110	hsa-miR-136-5p	gene-gene-pos	+validated miRTarBase	0.75	24374217	false	gene-gene-pos	24374217	+validated miRTarBase	9110	MTMR4	MIMAT0000448	hsa-miR-136-5p	9110 (validated miRTarBase) MIMAT0000448		0.75
validated miRTarBase	4835	1480	24374217	136319	hsa-miR-136-5p	gene-gene-pos	+validated miRTarBase	0.75	24374217	false	gene-gene-pos	24374217	+validated miRTarBase	136319	MTPN	MIMAT0000448	hsa-miR-136-5p	136319 (validated miRTarBase) MIMAT0000448		0.75
validated miRTarBase	4832	1480	22100165	135656	hsa-miR-24-1-5p	gene-gene-pos	+validated miRTarBase	0.75	22100165	false	gene-gene-pos	22100165	+validated miRTarBase	135656	MUCL3	MIMAT0000079	hsa-miR-24-1-5p	135656 (validated miRTarBase) MIMAT0000079		0.75
validated miRTarBase	5435	1480	21566225	26509	hsa-miR-34a-5p	gene-gene-pos	+validated miRTarBase	0.75	21566225	false	gene-gene-pos	21566225	+validated miRTarBase	26509	MYOF	MIMAT0000255	hsa-miR-34a-5p	26509 (validated miRTarBase) MIMAT0000255		0.75
validated miRTarBase	6617	1480	22012620	84665	hsa-miR-133a-3p	gene-gene-pos	+validated miRTarBase	0.75	22012620	false	gene-gene-pos	22012620	+validated miRTarBase	84665	MYPN	MIMAT0000427	hsa-miR-133a	84665 (validated miRTarBase) MIMAT0000427		0.75
validated miRTarBase	5918	1480	20371350	440145	hsa-miR-425-5p	gene-gene-pos	+validated miRTarBase	0.75	20371350	false	gene-gene-pos	20371350	+validated miRTarBase	440145	MZT1	MIMAT0003393	hsa-miR-425-5p	440145 (validated miRTarBase) MIMAT0003393		0.75
validated miRTarBase	6338	1480	23622248	65220	hsa-miR-425-5p	gene-gene-pos	+validated miRTarBase	0.75	23622248	false	gene-gene-pos	23622248	+validated miRTarBase	65220	NADK	MIMAT0003393	hsa-miR-425-5p	65220 (validated miRTarBase) MIMAT0003393		0.75
validated miRTarBase	5942	1480	24374217	4677	hsa-miR-136-5p	gene-gene-pos	+validated miRTarBase	0.75	24374217	false	gene-gene-pos	24374217	+validated miRTarBase	4677	NARS1	MIMAT0000448	hsa-miR-136-5p	4677 (validated miRTarBase) MIMAT0000448		0.75
validated miRTarBase	5135	1480	20371350	22916	hsa-miR-34a-5p	gene-gene-pos	+validated miRTarBase	0.75	20371350	false	gene-gene-pos	20371350	+validated miRTarBase	22916	NCBP2	MIMAT0000255	hsa-miR-34a-5p	22916 (validated miRTarBase) MIMAT0000255		0.75
validated miRTarBase	5183	1480	23313552|23824327|24906430	23154	hsa-miR-133a-3p	gene-gene-pos	+validated miRTarBase	0.75	23313552|23824327|24906430	false	gene-gene-pos	23313552|23824327|24906430	+validated miRTarBase	23154	NCDN	MIMAT0000427	hsa-miR-133a	23154 (validated miRTarBase) MIMAT0000427		0.75
validated miRTarBase	5924	1480	23622248	4541	hsa-miR-99b-5p	gene-gene-pos	+validated miRTarBase	0.75	23622248	false	gene-gene-pos	23622248	+validated miRTarBase	4541	ND6	MIMAT0000689	hsa-miR-99b-5p	4541 (validated miRTarBase) MIMAT0000689		0.75
validated miRTarBase	4541	1480	21566225	10397	hsa-miR-34a-5p	gene-gene-pos	+validated miRTarBase	0.75	21566225	false	gene-gene-pos	21566225	+validated miRTarBase	10397	NDRG1	MIMAT0000255	hsa-miR-34a-5p	10397 (validated miRTarBase) MIMAT0000255		0.75
validated miRTarBase	4883	1480	19536157	150372	hsa-miR-133a-3p	gene-gene-pos	+validated miRTarBase	0.75	19536157	false	gene-gene-pos	19536157	+validated miRTarBase	150372	NFAM1	MIMAT0000427	hsa-miR-133a	150372 (validated miRTarBase) MIMAT0000427		0.75
validated miRTarBase	5381	1480	24374217	25836	hsa-miR-136-5p	gene-gene-pos	+validated miRTarBase	0.75	24374217	false	gene-gene-pos	24374217	+validated miRTarBase	25836	NIPBL	MIMAT0000448	hsa-miR-136-5p	25836 (validated miRTarBase) MIMAT0000448		0.75
validated miRTarBase	5276	1480	21566225	23530	hsa-miR-34a-5p	gene-gene-pos	+validated miRTarBase	0.75	21566225	false	gene-gene-pos	21566225	+validated miRTarBase	23530	NNT	MIMAT0000255	hsa-miR-34a-5p	23530 (validated miRTarBase) MIMAT0000255		0.75
validated miRTarBase	6179	1480	23622248	56654	hsa-miR-99b-5p	gene-gene-pos	+validated miRTarBase	0.75	23622248	false	gene-gene-pos	23622248	+validated miRTarBase	56654	NPDC1	MIMAT0000689	hsa-miR-99b-5p	56654 (validated miRTarBase) MIMAT0000689		0.75
validated miRTarBase	5354	1480	23622248	255743	hsa-miR-425-5p	gene-gene-pos	+validated miRTarBase	0.75	23622248	false	gene-gene-pos	23622248	+validated miRTarBase	255743	NPNT	MIMAT0003393	hsa-miR-425-5p	255743 (validated miRTarBase) MIMAT0003393		0.75
validated miRTarBase	6314	1480	19536157	64111	hsa-miR-136-5p	gene-gene-pos	+validated miRTarBase	0.75	19536157	false	gene-gene-pos	19536157	+validated miRTarBase	64111	NPVF	MIMAT0000448	hsa-miR-136-5p	64111 (validated miRTarBase) MIMAT0000448		0.75
validated miRTarBase	6449	1480	19536157	7376	hsa-miR-136-5p	gene-gene-pos	+validated miRTarBase	0.75	19536157	false	gene-gene-pos	19536157	+validated miRTarBase	7376	NR1H2	MIMAT0000448	hsa-miR-136-5p	7376 (validated miRTarBase) MIMAT0000448		0.75
validated miRTarBase	5963	1480	23622248	4929	hsa-miR-133a-3p	gene-gene-pos	+validated miRTarBase	0.75	23622248	false	gene-gene-pos	23622248	+validated miRTarBase	4929	NR4A2	MIMAT0000427	hsa-miR-133a	4929 (validated miRTarBase) MIMAT0000427		0.75
validated miRTarBase	5960	1480	21572407	4893	hsa-miR-425-5p	gene-gene-pos	+validated miRTarBase	0.75	21572407	false	gene-gene-pos	21572407	+validated miRTarBase	4893	NRAS	MIMAT0003393	hsa-miR-425-5p	4893 (validated miRTarBase) MIMAT0003393		0.75
validated miRTarBase	5144	1480	21566225	22978	hsa-miR-34a-5p	gene-gene-pos	+validated miRTarBase	0.75	21566225	false	gene-gene-pos	21566225	+validated miRTarBase	22978	NT5C2	MIMAT0000255	hsa-miR-34a-5p	22978 (validated miRTarBase) MIMAT0000255		0.75
validated miRTarBase	6539	1480	23824327	80224	hsa-miR-136-5p	gene-gene-pos	+validated miRTarBase	0.75	23824327	false	gene-gene-pos	23824327	+validated miRTarBase	80224	NUBPL	MIMAT0000448	hsa-miR-136-5p	80224 (validated miRTarBase) MIMAT0000448		0.75
validated miRTarBase	6332	10147.7	24374217	64710	hsa-miR-136-5p	gene-gene-pos	+validated miRTarBase	0.75	24374217	false	gene-gene-pos	24374217	+validated miRTarBase	64710	NUCKS1	MIMAT0000448	hsa-miR-136-5p	64710 (validated miRTarBase) MIMAT0000448		0.75
validated miRTarBase	6329	10743.4	21566225	64710	hsa-miR-34a-5p	gene-gene-pos	+validated miRTarBase	0.75	21566225	false	gene-gene-pos	21566225	+validated miRTarBase	64710	NUCKS1	MIMAT0000255	hsa-miR-34a-5p	64710 (validated miRTarBase) MIMAT0000255		0.75
validated miRTarBase	4685	1480	24374217	11165	hsa-miR-136-5p	gene-gene-pos	+validated miRTarBase	0.75	24374217	false	gene-gene-pos	24374217	+validated miRTarBase	11165	NUDT3	MIMAT0000448	hsa-miR-136-5p	11165 (validated miRTarBase) MIMAT0000448		0.75
validated miRTarBase	4682	1480	23622248	11164	hsa-miR-34a-5p	gene-gene-pos	+validated miRTarBase	0.75	23622248	false	gene-gene-pos	23622248	+validated miRTarBase	11164	NUDT5	MIMAT0000255	hsa-miR-34a-5p	11164 (validated miRTarBase) MIMAT0000255		0.75
validated miRTarBase	4649	1480	21566225	11097	hsa-miR-34a-5p	gene-gene-pos	+validated miRTarBase	0.75	21566225	false	gene-gene-pos	21566225	+validated miRTarBase	11097	NUP42	MIMAT0000255	hsa-miR-34a-5p	11097 (validated miRTarBase) MIMAT0000255		0.75
validated miRTarBase	5306	1480	20371350	23636	hsa-miR-34a-5p	gene-gene-pos	+validated miRTarBase	0.75	20371350	false	gene-gene-pos	20371350	+validated miRTarBase	23636	NUP62	MIMAT0000255	hsa-miR-34a-5p	23636 (validated miRTarBase) MIMAT0000255		0.75
validated miRTarBase	5969	1480	23622248	4942	hsa-miR-99b-5p	gene-gene-pos	+validated miRTarBase	0.75	23622248	false	gene-gene-pos	23622248	+validated miRTarBase	4942	OAT	MIMAT0000689	hsa-miR-99b-5p	4942 (validated miRTarBase) MIMAT0000689		0.75
validated miRTarBase	5972	1480	21572407	4952	hsa-miR-425-5p	gene-gene-pos	+validated miRTarBase	0.75	21572407	false	gene-gene-pos	21572407	+validated miRTarBase	4952	OCRL	MIMAT0003393	hsa-miR-425-5p	4952 (validated miRTarBase) MIMAT0003393		0.75
validated miRTarBase	4961	1480	23824327	167826	hsa-miR-136-5p	gene-gene-pos	+validated miRTarBase	0.75	23824327	false	gene-gene-pos	23824327	+validated miRTarBase	167826	OLIG3	MIMAT0000448	hsa-miR-136-5p	167826 (validated miRTarBase) MIMAT0000448		0.75
validated miRTarBase	6536	1480	19536157	80207	hsa-miR-136-5p	gene-gene-pos	+validated miRTarBase	0.75	19536157	false	gene-gene-pos	19536157	+validated miRTarBase	80207	OPA3	MIMAT0000448	hsa-miR-136-5p	80207 (validated miRTarBase) MIMAT0000448		0.75
validated miRTarBase	5528	1480	23824327	29095	hsa-miR-425-5p	gene-gene-pos	+validated miRTarBase	0.75	23824327	false	gene-gene-pos	23824327	+validated miRTarBase	29095	ORMDL2	MIMAT0003393	hsa-miR-425-5p	29095 (validated miRTarBase) MIMAT0003393		0.75
validated miRTarBase	6065	1480	24374217	54491	hsa-miR-136-5p	gene-gene-pos	+validated miRTarBase	0.75	24374217	false	gene-gene-pos	24374217	+validated miRTarBase	54491	OTULINL	MIMAT0000448	hsa-miR-136-5p	54491 (validated miRTarBase) MIMAT0000448		0.75
validated miRTarBase	4751	1480	20371350	116224	hsa-miR-425-5p	gene-gene-pos	+validated miRTarBase	0.75	20371350	false	gene-gene-pos	20371350	+validated miRTarBase	116224	PABIR1	MIMAT0003393	hsa-miR-425-5p	116224 (validated miRTarBase) MIMAT0003393		0.75
validated miRTarBase	4916	1480	20371350	159090	hsa-miR-425-5p	gene-gene-pos	+validated miRTarBase	0.75	20371350	false	gene-gene-pos	20371350	+validated miRTarBase	159090	PABIR2	MIMAT0003393	hsa-miR-425-5p	159090 (validated miRTarBase) MIMAT0003393		0.75
validated miRTarBase	5213	1480	23592263	23241	hsa-miR-133a-3p	gene-gene-pos	+validated miRTarBase	0.75	23592263	false	gene-gene-pos	23592263	+validated miRTarBase	23241	PACS2	MIMAT0000427	hsa-miR-133a	23241 (validated miRTarBase) MIMAT0000427		0.75
validated miRTarBase	5978	1480	23446348	5048	hsa-miR-136-5p	gene-gene-pos	+validated miRTarBase	0.75	23446348	false	gene-gene-pos	23446348	+validated miRTarBase	5048	PAFAH1B1	MIMAT0000448	hsa-miR-136-5p	5048 (validated miRTarBase) MIMAT0000448		0.75
validated miRTarBase	5864	1480	23824327	400961	hsa-miR-136-5p	gene-gene-pos	+validated miRTarBase	0.75	23824327	false	gene-gene-pos	23824327	+validated miRTarBase	400961	PAIP2B	MIMAT0000448	hsa-miR-136-5p	400961 (validated miRTarBase) MIMAT0000448		0.75
validated miRTarBase	6185	1480	23824327	56924	hsa-miR-136-5p	gene-gene-pos	+validated miRTarBase	0.75	23824327	false	gene-gene-pos	23824327	+validated miRTarBase	56924	PAK6	MIMAT0000448	hsa-miR-136-5p	56924 (validated miRTarBase) MIMAT0000448		0.75
validated miRTarBase	5468	1480	24374217	27445	hsa-miR-136-5p	gene-gene-pos	+validated miRTarBase	0.75	24374217	false	gene-gene-pos	24374217	+validated miRTarBase	27445	PCLO	MIMAT0000448	hsa-miR-136-5p	27445 (validated miRTarBase) MIMAT0000448		0.75
validated miRTarBase	5999	1480	23824327	5136	hsa-miR-133a-3p	gene-gene-pos	+validated miRTarBase	0.75	23824327	false	gene-gene-pos	23824327	+validated miRTarBase	5136	PDE1A	MIMAT0000427	hsa-miR-133a	5136 (validated miRTarBase) MIMAT0000427		0.75
validated miRTarBase	4766	1480	23622248	118987	hsa-miR-425-5p	gene-gene-pos	+validated miRTarBase	0.75	23622248	false	gene-gene-pos	23622248	+validated miRTarBase	118987	PDZD8	MIMAT0003393	hsa-miR-425-5p	118987 (validated miRTarBase) MIMAT0003393		0.75
validated miRTarBase	5174	1480	23446348	23089	hsa-miR-34a-5p	gene-gene-pos	+validated miRTarBase	0.75	23446348	false	gene-gene-pos	23446348	+validated miRTarBase	23089	PEG10	MIMAT0000255	hsa-miR-34a-5p	23089 (validated miRTarBase) MIMAT0000255		0.75
validated miRTarBase	6032	1480	23824327	5187	hsa-miR-136-5p	gene-gene-pos	+validated miRTarBase	0.75	23824327	false	gene-gene-pos	23824327	+validated miRTarBase	5187	PER1	MIMAT0000448	hsa-miR-136-5p	5187 (validated miRTarBase) MIMAT0000448		0.75
validated miRTarBase	6686	1480	23313552	8864	hsa-miR-133a-3p	gene-gene-pos	+validated miRTarBase	0.75	23313552	false	gene-gene-pos	23313552	+validated miRTarBase	8864	PER2	MIMAT0000427	hsa-miR-133a	8864 (validated miRTarBase) MIMAT0000427		0.75
validated miRTarBase	6311	1480	24374217	64065	hsa-miR-136-5p	gene-gene-pos	+validated miRTarBase	0.75	24374217	false	gene-gene-pos	24374217	+validated miRTarBase	64065	PERP	MIMAT0000448	hsa-miR-136-5p	64065 (validated miRTarBase) MIMAT0000448		0.75
validated miRTarBase	6770	1480	24374217	9749	hsa-miR-136-5p	gene-gene-pos	+validated miRTarBase	0.75	24374217	false	gene-gene-pos	24374217	+validated miRTarBase	9749	PHACTR2	MIMAT0000448	hsa-miR-136-5p	9749 (validated miRTarBase) MIMAT0000448		0.75
validated miRTarBase	5423	1480	20371350|23446348	26147	hsa-miR-34a-5p	gene-gene-pos	+validated miRTarBase	0.75	20371350|23446348	false	gene-gene-pos	20371350|23446348	+validated miRTarBase	26147	PHF19	MIMAT0000255	hsa-miR-34a-5p	26147 (validated miRTarBase) MIMAT0000255		0.75
validated miRTarBase	6041	1480	19536157	5284	hsa-miR-133a-3p	gene-gene-pos	+validated miRTarBase	0.75	19536157	false	gene-gene-pos	19536157	+validated miRTarBase	5284	PIGR	MIMAT0000427	hsa-miR-133a	5284 (validated miRTarBase) MIMAT0000427		0.75
validated miRTarBase	5588	1480	19536157	29990	hsa-miR-136-5p	gene-gene-pos	+validated miRTarBase	0.75	19536157	false	gene-gene-pos	19536157	+validated miRTarBase	29990	PILRB	MIMAT0000448	hsa-miR-136-5p	29990 (validated miRTarBase) MIMAT0000448		0.75
validated miRTarBase	6044	1480	20371350	5305	hsa-miR-425-5p	gene-gene-pos	+validated miRTarBase	0.75	20371350	false	gene-gene-pos	20371350	+validated miRTarBase	5305	PIP4K2A	MIMAT0003393	hsa-miR-425-5p	5305 (validated miRTarBase) MIMAT0003393		0.75
validated miRTarBase	6590	1480	23622248	8396	hsa-miR-99b-5p	gene-gene-pos	+validated miRTarBase	0.75	23622248	false	gene-gene-pos	23622248	+validated miRTarBase	8396	PIP4K2B	MIMAT0000689	hsa-miR-99b-5p	8396 (validated miRTarBase) MIMAT0000689		0.75
validated miRTarBase	6047	1480	18464261	5315	hsa-miR-133a-3p	gene-gene-pos	+validated miRTarBase	0.75	18464261	false	gene-gene-pos	18464261	+validated miRTarBase	5315	PKM	MIMAT0000427	hsa-miR-133a	5315 (validated miRTarBase) MIMAT0000427		0.75
validated miRTarBase	5432	1480	23592263	26279	hsa-miR-34a-5p	gene-gene-pos	+validated miRTarBase	0.75	23592263	false	gene-gene-pos	23592263	+validated miRTarBase	26279	PLA2G2D	MIMAT0000255	hsa-miR-34a-5p	26279 (validated miRTarBase) MIMAT0000255		0.75
validated miRTarBase	5348	1480	23622248	255189	hsa-miR-99b-5p	gene-gene-pos	+validated miRTarBase	0.75	23622248	false	gene-gene-pos	23622248	+validated miRTarBase	255189	PLA2G4F	MIMAT0000689	hsa-miR-99b-5p	255189 (validated miRTarBase) MIMAT0000689		0.75
validated miRTarBase	6350	1480	21396852	65977	hsa-miR-133a-3p	gene-gene-pos	+validated miRTarBase	0.75	21396852	false	gene-gene-pos	21396852	+validated miRTarBase	65977	PLEKHA3	MIMAT0000427	hsa-miR-133a	65977 (validated miRTarBase) MIMAT0000427		0.75
validated miRTarBase	5129	1480	24374217	22874	hsa-miR-136-5p	gene-gene-pos	+validated miRTarBase	0.75	24374217	false	gene-gene-pos	24374217	+validated miRTarBase	22874	PLEKHA6	MIMAT0000448	hsa-miR-136-5p	22874 (validated miRTarBase) MIMAT0000448		0.75
validated miRTarBase	6335	1480	23313552	64857	hsa-miR-133a-3p	gene-gene-pos	+validated miRTarBase	0.75	23313552	false	gene-gene-pos	23313552	+validated miRTarBase	64857	PLEKHG2	MIMAT0000427	hsa-miR-133a	64857 (validated miRTarBase) MIMAT0000427		0.75
validated miRTarBase	4520	1480	21566225	10226	hsa-miR-34a-5p	gene-gene-pos	+validated miRTarBase	0.75	21566225	false	gene-gene-pos	21566225	+validated miRTarBase	10226	PLIN3	MIMAT0000255	hsa-miR-34a-5p	10226 (validated miRTarBase) MIMAT0000255		0.75
validated miRTarBase	6053	10842.4	24374217	5352	hsa-miR-136-5p	gene-gene-pos	+validated miRTarBase	0.75	24374217	false	gene-gene-pos	24374217	+validated miRTarBase	5352	PLOD2	MIMAT0000448	hsa-miR-136-5p	5352 (validated miRTarBase) MIMAT0000448		0.75
validated miRTarBase	6056	10677.2	23622248	5352	hsa-miR-425-5p	gene-gene-pos	+validated miRTarBase	0.75	23622248	false	gene-gene-pos	23622248	+validated miRTarBase	5352	PLOD2	MIMAT0003393	hsa-miR-425-5p	5352 (validated miRTarBase) MIMAT0003393		0.75
validated miRTarBase	4703	1480	21566225	11212	hsa-miR-34a-5p	gene-gene-pos	+validated miRTarBase	0.75	21566225	false	gene-gene-pos	21566225	+validated miRTarBase	11212	PLPBP	MIMAT0000255	hsa-miR-34a-5p	11212 (validated miRTarBase) MIMAT0000255		0.75
validated miRTarBase	6191	1480	22012620	57088	hsa-miR-425-5p	gene-gene-pos	+validated miRTarBase	0.75	22012620	false	gene-gene-pos	22012620	+validated miRTarBase	57088	PLSCR4	MIMAT0003393	hsa-miR-425-5p	57088 (validated miRTarBase) MIMAT0003393		0.75
validated miRTarBase	6125	1480	23824327	55558	hsa-miR-425-5p	gene-gene-pos	+validated miRTarBase	0.75	23824327	false	gene-gene-pos	23824327	+validated miRTarBase	55558	PLXNA3	MIMAT0003393	hsa-miR-425-5p	55558 (validated miRTarBase) MIMAT0003393		0.75
validated miRTarBase	5387	1480	19536157	25953	hsa-miR-24-1-5p	gene-gene-pos	+validated miRTarBase	0.75	19536157	false	gene-gene-pos	19536157	+validated miRTarBase	25953	PNKD	MIMAT0000079	hsa-miR-24-1-5p	25953 (validated miRTarBase) MIMAT0000079		0.75
validated miRTarBase	6116	1480	23313552|23824327	55228	hsa-miR-425-5p	gene-gene-pos	+validated miRTarBase	0.75	23313552|23824327	false	gene-gene-pos	23313552|23824327	+validated miRTarBase	55228	PNMA8A	MIMAT0003393	hsa-miR-425-5p	55228 (validated miRTarBase) MIMAT0003393		0.75
validated miRTarBase	4616	1480	21566225	10908	hsa-miR-34a-5p	gene-gene-pos	+validated miRTarBase	0.75	21566225	false	gene-gene-pos	21566225	+validated miRTarBase	10908	PNPLA6	MIMAT0000255	hsa-miR-34a-5p	10908 (validated miRTarBase) MIMAT0000255		0.75
validated miRTarBase	6668	1480	23824327	87178	hsa-miR-136-5p	gene-gene-pos	+validated miRTarBase	0.75	23824327	false	gene-gene-pos	23824327	+validated miRTarBase	87178	PNPT1	MIMAT0000448	hsa-miR-136-5p	87178 (validated miRTarBase) MIMAT0000448		0.75
validated miRTarBase	5180	1480	20371350	23126	hsa-miR-34a-5p	gene-gene-pos	+validated miRTarBase	0.75	20371350	false	gene-gene-pos	20371350	+validated miRTarBase	23126	POGZ	MIMAT0000255	hsa-miR-34a-5p	23126 (validated miRTarBase) MIMAT0000255		0.75
validated miRTarBase	4601	1480	23824327	10714	hsa-miR-136-5p	gene-gene-pos	+validated miRTarBase	0.75	23824327	false	gene-gene-pos	23824327	+validated miRTarBase	10714	POLD3	MIMAT0000448	hsa-miR-136-5p	10714 (validated miRTarBase) MIMAT0000448		0.75
validated miRTarBase	4625	1480	21566225	10940	hsa-miR-34a-5p	gene-gene-pos	+validated miRTarBase	0.75	21566225	false	gene-gene-pos	21566225	+validated miRTarBase	10940	POP1	MIMAT0000255	hsa-miR-34a-5p	10940 (validated miRTarBase) MIMAT0000255		0.75
validated miRTarBase	5657	1480	23313552	317754	hsa-miR-34a-5p	gene-gene-pos	+validated miRTarBase	0.75	23313552	false	gene-gene-pos	23313552	+validated miRTarBase	317754	POTED	MIMAT0000255	hsa-miR-34a-5p	317754 (validated miRTarBase) MIMAT0000255		0.75
validated miRTarBase	5870	1480	20371350	404785	hsa-miR-136-5p	gene-gene-pos	+validated miRTarBase	0.75	20371350	false	gene-gene-pos	20371350	+validated miRTarBase	404785	POTEG	MIMAT0000448	hsa-miR-136-5p	404785 (validated miRTarBase) MIMAT0000448		0.75
validated miRTarBase	6317	1480	20371350	641455	hsa-miR-136-5p	gene-gene-pos	+validated miRTarBase	0.75	20371350	false	gene-gene-pos	20371350	+validated miRTarBase	641455	POTEM	MIMAT0000448	hsa-miR-136-5p	641455 (validated miRTarBase) MIMAT0000448		0.75
validated miRTarBase	6077	1480	23622248	5471	hsa-miR-425-5p	gene-gene-pos	+validated miRTarBase	0.75	23622248	false	gene-gene-pos	23622248	+validated miRTarBase	5471	PPAT	MIMAT0003393	hsa-miR-425-5p	5471 (validated miRTarBase) MIMAT0003393		0.75
validated miRTarBase	6098	1480	22815788	5500	hsa-miR-99b-5p	gene-gene-pos	+validated miRTarBase	0.75	22815788	false	gene-gene-pos	22815788	+validated miRTarBase	5500	PPP1CB	MIMAT0000689	hsa-miR-99b-5p	5500 (validated miRTarBase) MIMAT0000689		0.75
validated miRTarBase	5309	1480	23824327	23645	hsa-miR-136-5p	gene-gene-pos	+validated miRTarBase	0.75	23824327	false	gene-gene-pos	23824327	+validated miRTarBase	23645	PPP1R15A	MIMAT0000448	hsa-miR-136-5p	23645 (validated miRTarBase) MIMAT0000448		0.75
validated miRTarBase	6632	1480	20371350	84919	hsa-miR-425-5p	gene-gene-pos	+validated miRTarBase	0.75	20371350	false	gene-gene-pos	20371350	+validated miRTarBase	84919	PPP1R15B	MIMAT0003393	hsa-miR-425-5p	84919 (validated miRTarBase) MIMAT0003393		0.75
validated miRTarBase	6107	1480	20371350|21572407	5516	hsa-miR-425-5p	gene-gene-pos	+validated miRTarBase	0.75	20371350|21572407	false	gene-gene-pos	20371350|21572407	+validated miRTarBase	5516	PPP2CB	MIMAT0003393	hsa-miR-425-5p	5516 (validated miRTarBase) MIMAT0003393		0.75
validated miRTarBase	6137	1480	24398324	55671	hsa-miR-425-5p	gene-gene-pos	+validated miRTarBase	0.75	24398324	false	gene-gene-pos	24398324	+validated miRTarBase	55671	PPP4R3A	MIMAT0003393	hsa-miR-425-5p	55671 (validated miRTarBase) MIMAT0003393		0.75
validated miRTarBase	5171	1480	23622248	23082	hsa-miR-425-5p	gene-gene-pos	+validated miRTarBase	0.75	23622248	false	gene-gene-pos	23622248	+validated miRTarBase	23082	PPRC1	MIMAT0003393	hsa-miR-425-5p	23082 (validated miRTarBase) MIMAT0003393		0.75
validated miRTarBase	5453	1480	21396852	27166	hsa-miR-133a-3p	gene-gene-pos	+validated miRTarBase	0.75	21396852	false	gene-gene-pos	21396852	+validated miRTarBase	27166	PRELID1	MIMAT0000427	hsa-miR-133a	27166 (validated miRTarBase) MIMAT0000427		0.75
validated miRTarBase	6146	1480	22012620	5573	hsa-miR-24-1-5p	gene-gene-pos	+validated miRTarBase	0.75	22012620	false	gene-gene-pos	22012620	+validated miRTarBase	5573	PRKAR1A	MIMAT0000079	hsa-miR-24-1-5p	5573 (validated miRTarBase) MIMAT0000079		0.75
validated miRTarBase	6068	1480	20371350|22012620	54496	hsa-miR-24-1-5p	gene-gene-pos	+validated miRTarBase	0.75	20371350|22012620	false	gene-gene-pos	20371350|22012620	+validated miRTarBase	54496	PRMT7	MIMAT0000079	hsa-miR-24-1-5p	54496 (validated miRTarBase) MIMAT0000079		0.75
validated miRTarBase	6062	1480	23622248	54458	hsa-miR-425-5p	gene-gene-pos	+validated miRTarBase	0.75	23622248	false	gene-gene-pos	23622248	+validated miRTarBase	54458	PRR13	MIMAT0003393	hsa-miR-425-5p	54458 (validated miRTarBase) MIMAT0003393		0.75
validated miRTarBase	4709	1480	23592263	112476	hsa-miR-133a-3p	gene-gene-pos	+validated miRTarBase	0.75	23592263	false	gene-gene-pos	23592263	+validated miRTarBase	112476	PRRT2	MIMAT0000427	hsa-miR-133a	112476 (validated miRTarBase) MIMAT0000427		0.75
validated miRTarBase	6188	1480	23313552	5704	hsa-miR-133a-3p	gene-gene-pos	+validated miRTarBase	0.75	23313552	false	gene-gene-pos	23313552	+validated miRTarBase	5704	PSMC4	MIMAT0000427	hsa-miR-133a	5704 (validated miRTarBase) MIMAT0000427		0.75
validated miRTarBase	6194	1480	23622248	5714	hsa-miR-425-5p	gene-gene-pos	+validated miRTarBase	0.75	23622248	false	gene-gene-pos	23622248	+validated miRTarBase	5714	PSMD8	MIMAT0003393	hsa-miR-425-5p	5714 (validated miRTarBase) MIMAT0003393		0.75
validated miRTarBase	6653	1480	21572407	8624	hsa-miR-133a-3p	gene-gene-pos	+validated miRTarBase	0.75	21572407	false	gene-gene-pos	21572407	+validated miRTarBase	8624	PSMG1	MIMAT0000427	hsa-miR-133a	8624 (validated miRTarBase) MIMAT0000427		0.75
validated miRTarBase	6215	1480	20371350	5757	hsa-miR-133a-3p	gene-gene-pos	+validated miRTarBase	0.75	20371350	false	gene-gene-pos	20371350	+validated miRTarBase	5757	PTMA	MIMAT0000427	hsa-miR-133a	5757 (validated miRTarBase) MIMAT0000427		0.75
validated miRTarBase	5246	1480	20371350	23369	hsa-miR-34a-5p	gene-gene-pos	+validated miRTarBase	0.75	20371350	false	gene-gene-pos	20371350	+validated miRTarBase	23369	PUM2	MIMAT0000255	hsa-miR-34a-5p	23369 (validated miRTarBase) MIMAT0000255		0.75
validated miRTarBase	6230	1480	21572407	5814	hsa-miR-136-5p	gene-gene-pos	+validated miRTarBase	0.75	21572407	false	gene-gene-pos	21572407	+validated miRTarBase	5814	PURB	MIMAT0000448	hsa-miR-136-5p	5814 (validated miRTarBase) MIMAT0000448		0.75
validated miRTarBase	6743	1480	23622248	9444	hsa-miR-425-5p	gene-gene-pos	+validated miRTarBase	0.75	23622248	false	gene-gene-pos	23622248	+validated miRTarBase	9444	QKI	MIMAT0003393	hsa-miR-425-5p	9444 (validated miRTarBase) MIMAT0003393		0.75
validated miRTarBase	5147	1480	24374217	23011	hsa-miR-136-5p	gene-gene-pos	+validated miRTarBase	0.75	24374217	false	gene-gene-pos	24374217	+validated miRTarBase	23011	RAB21	MIMAT0000448	hsa-miR-136-5p	23011 (validated miRTarBase) MIMAT0000448		0.75
validated miRTarBase	4643	1480	23592263	11031	hsa-miR-425-5p	gene-gene-pos	+validated miRTarBase	0.75	23592263	false	gene-gene-pos	23592263	+validated miRTarBase	11031	RAB31	MIMAT0003393	hsa-miR-425-5p	11031 (validated miRTarBase) MIMAT0003393		0.75
validated miRTarBase	5372	1480	21566225	25782	hsa-miR-34a-5p	gene-gene-pos	+validated miRTarBase	0.75	21566225	false	gene-gene-pos	21566225	+validated miRTarBase	25782	RAB3GAP2	MIMAT0000255	hsa-miR-34a-5p	25782 (validated miRTarBase) MIMAT0000255		0.75
validated miRTarBase	4676	1480	23592263	11159	hsa-miR-136-5p	gene-gene-pos	+validated miRTarBase	0.75	23592263	false	gene-gene-pos	23592263	+validated miRTarBase	11159	RABL2A	MIMAT0000448	hsa-miR-136-5p	11159 (validated miRTarBase) MIMAT0000448		0.75
validated miRTarBase	4673	1480	23592263	11158	hsa-miR-136-5p	gene-gene-pos	+validated miRTarBase	0.75	23592263	false	gene-gene-pos	23592263	+validated miRTarBase	11158	RABL2B	MIMAT0000448	hsa-miR-136-5p	11158 (validated miRTarBase) MIMAT0000448		0.75
validated miRTarBase	6143	1480	23622248	55684	hsa-miR-425-5p	gene-gene-pos	+validated miRTarBase	0.75	23622248	false	gene-gene-pos	23622248	+validated miRTarBase	55684	RABL6	MIMAT0003393	hsa-miR-425-5p	55684 (validated miRTarBase) MIMAT0003393		0.75
validated miRTarBase	6236	1480	20371350|21572407|23446348|23592263|24398324	5879	hsa-miR-136-5p	gene-gene-pos	+validated miRTarBase	0.75	20371350|21572407|23446348|23592263|24398324	false	gene-gene-pos	20371350|21572407|23446348|23592263|24398324	+validated miRTarBase	5879	RAC1	MIMAT0000448	hsa-miR-136-5p	5879 (validated miRTarBase) MIMAT0000448		0.75
validated miRTarBase	5531	1480	20371350|21572407|23446348|23592263	29127	hsa-miR-24-1-5p	gene-gene-pos	+validated miRTarBase	0.75	20371350|21572407|23446348|23592263	false	gene-gene-pos	20371350|21572407|23446348|23592263	+validated miRTarBase	29127	RACGAP1	MIMAT0000079	hsa-miR-24-1-5p	29127 (validated miRTarBase) MIMAT0000079		0.75
validated miRTarBase	4577	1480	21566225	10616	hsa-miR-34a-5p	gene-gene-pos	+validated miRTarBase	0.75	21566225	false	gene-gene-pos	21566225	+validated miRTarBase	10616	RBCK1	MIMAT0000255	hsa-miR-34a-5p	10616 (validated miRTarBase) MIMAT0000255		0.75
validated miRTarBase	5282	1480	23824327	23543	hsa-miR-136-5p	gene-gene-pos	+validated miRTarBase	0.75	23824327	false	gene-gene-pos	23824327	+validated miRTarBase	23543	RBFOX2	MIMAT0000448	hsa-miR-136-5p	23543 (validated miRTarBase) MIMAT0000448		0.75
validated miRTarBase	4435	1480	21566225	10137	hsa-miR-34a-5p	gene-gene-pos	+validated miRTarBase	0.75	21566225	false	gene-gene-pos	21566225	+validated miRTarBase	10137	RBM12	MIMAT0000255	hsa-miR-34a-5p	10137 (validated miRTarBase) MIMAT0000255		0.75
validated miRTarBase	5831	1480	23824327	389677	hsa-miR-136-5p	gene-gene-pos	+validated miRTarBase	0.75	23824327	false	gene-gene-pos	23824327	+validated miRTarBase	389677	RBM12B	MIMAT0000448	hsa-miR-136-5p	389677 (validated miRTarBase) MIMAT0000448		0.75
validated miRTarBase	5570	1480	23622248	29890	hsa-miR-34a-5p	gene-gene-pos	+validated miRTarBase	0.75	23622248	false	gene-gene-pos	23622248	+validated miRTarBase	29890	RBM15B	MIMAT0000255	hsa-miR-34a-5p	29890 (validated miRTarBase) MIMAT0000255		0.75
validated miRTarBase	4910	1480	23622248	155435	hsa-miR-34a-5p	gene-gene-pos	+validated miRTarBase	0.75	23622248	false	gene-gene-pos	23622248	+validated miRTarBase	155435	RBM33	MIMAT0000255	hsa-miR-34a-5p	155435 (validated miRTarBase) MIMAT0000255		0.75
validated miRTarBase	6803	10842.4	23824327	9939	hsa-miR-136-5p	gene-gene-pos	+validated miRTarBase	0.75	23824327	false	gene-gene-pos	23824327	+validated miRTarBase	9939	RBM8A	MIMAT0000448	hsa-miR-136-5p	9939 (validated miRTarBase) MIMAT0000448		0.75
validated miRTarBase	6806	10677.2	20371350|22012620|23446348|23592263	9939	hsa-miR-425-5p	gene-gene-pos	+validated miRTarBase	0.75	20371350|22012620|23446348|23592263	false	gene-gene-pos	20371350|22012620|23446348|23592263	+validated miRTarBase	9939	RBM8A	MIMAT0003393	hsa-miR-425-5p	9939 (validated miRTarBase) MIMAT0003393		0.75
validated miRTarBase	5966	1480	23824327	494115	hsa-miR-133a-3p	gene-gene-pos	+validated miRTarBase	0.75	23824327	false	gene-gene-pos	23824327	+validated miRTarBase	494115	RBMXL1	MIMAT0000427	hsa-miR-133a	494115 (validated miRTarBase) MIMAT0000427		0.75
validated miRTarBase	6110	1480	20371350	55213	hsa-miR-136-5p	gene-gene-pos	+validated miRTarBase	0.75	20371350	false	gene-gene-pos	20371350	+validated miRTarBase	55213	RCBTB1	MIMAT0000448	hsa-miR-136-5p	55213 (validated miRTarBase) MIMAT0000448		0.75
validated miRTarBase	5099	1480	20371350	221035	hsa-miR-34a-5p	gene-gene-pos	+validated miRTarBase	0.75	20371350	false	gene-gene-pos	20371350	+validated miRTarBase	221035	REEP3	MIMAT0000255	hsa-miR-34a-5p	221035 (validated miRTarBase) MIMAT0000255		0.75
validated miRTarBase	6719	1480	21396852	91869	hsa-miR-133a-3p	gene-gene-pos	+validated miRTarBase	0.75	21396852	false	gene-gene-pos	21396852	+validated miRTarBase	91869	RFT1	MIMAT0000427	hsa-miR-133a	91869 (validated miRTarBase) MIMAT0000427		0.75
validated miRTarBase	5264	1480	22012620|23446348	23433	hsa-miR-133a-3p	gene-gene-pos	+validated miRTarBase	0.75	22012620|23446348	false	gene-gene-pos	22012620|23446348	+validated miRTarBase	23433	RHOQ	MIMAT0000427	hsa-miR-133a	23433 (validated miRTarBase) MIMAT0000427		0.75
validated miRTarBase	5987	1480	23706177	51132	hsa-miR-136-5p	gene-gene-pos	+validated miRTarBase	0.75	23706177	false	gene-gene-pos	23706177	+validated miRTarBase	51132	RLIM	MIMAT0000448	hsa-miR-136-5p	51132 (validated miRTarBase) MIMAT0000448		0.75
validated miRTarBase	4405	1480	21572407|22012620	100526767	hsa-miR-133a-3p	gene-gene-pos	+validated miRTarBase	0.75	21572407|22012620	false	gene-gene-pos	21572407|22012620	+validated miRTarBase	100526767	RNF103-CHMP3	MIMAT0000427	hsa-miR-133a	100526767 (validated miRTarBase) MIMAT0000427		0.75
validated miRTarBase	5393	1480	23622248	26001	hsa-miR-34a-5p	gene-gene-pos	+validated miRTarBase	0.75	23622248	false	gene-gene-pos	23622248	+validated miRTarBase	26001	RNF167	MIMAT0000255	hsa-miR-34a-5p	26001 (validated miRTarBase) MIMAT0000255		0.75
validated miRTarBase	4952	25687.5	23592263	165918	hsa-miR-425-5p	gene-gene-pos	+validated miRTarBase	0.75	23592263	false	gene-gene-pos	23592263	+validated miRTarBase	165918	RNF168	MIMAT0003393	hsa-miR-425-5p	165918 (validated miRTarBase) MIMAT0003393		0.75
validated miRTarBase	4949	25426.6	23824327	165918	hsa-miR-133a-3p	gene-gene-pos	+validated miRTarBase	0.75	23824327	false	gene-gene-pos	23824327	+validated miRTarBase	165918	RNF168	MIMAT0000427	hsa-miR-133a	165918 (validated miRTarBase) MIMAT0000427		0.75
validated miRTarBase	5342	1480	22815788	254225	hsa-miR-34a-5p	gene-gene-pos	+validated miRTarBase	0.75	22815788	false	gene-gene-pos	22815788	+validated miRTarBase	254225	RNF169	MIMAT0000255	hsa-miR-34a-5p	254225 (validated miRTarBase) MIMAT0000255		0.75
validated miRTarBase	6224	1480	23622248	57674	hsa-miR-99b-5p	gene-gene-pos	+validated miRTarBase	0.75	23622248	false	gene-gene-pos	23622248	+validated miRTarBase	57674	RNF213	MIMAT0000689	hsa-miR-99b-5p	57674 (validated miRTarBase) MIMAT0000689		0.75
validated miRTarBase	6269	1480	24374217	6049	hsa-miR-136-5p	gene-gene-pos	+validated miRTarBase	0.75	24374217	false	gene-gene-pos	24374217	+validated miRTarBase	6049	RNF6	MIMAT0000448	hsa-miR-136-5p	6049 (validated miRTarBase) MIMAT0000448		0.75
validated miRTarBase	5141	1480	21566225	22934	hsa-miR-34a-5p	gene-gene-pos	+validated miRTarBase	0.75	21566225	false	gene-gene-pos	21566225	+validated miRTarBase	22934	RPIA	MIMAT0000255	hsa-miR-34a-5p	22934 (validated miRTarBase) MIMAT0000255		0.75
validated miRTarBase	5501	10842.4	20371350	285855	hsa-miR-136-5p	gene-gene-pos	+validated miRTarBase	0.75	20371350	false	gene-gene-pos	20371350	+validated miRTarBase	285855	RPL7L1	MIMAT0000448	hsa-miR-136-5p	285855 (validated miRTarBase) MIMAT0000448		0.75
validated miRTarBase	5504	10677.2	20371350|21572407|23446348	285855	hsa-miR-425-5p	gene-gene-pos	+validated miRTarBase	0.75	20371350|21572407|23446348	false	gene-gene-pos	20371350|21572407|23446348	+validated miRTarBase	285855	RPL7L1	MIMAT0003393	hsa-miR-425-5p	285855 (validated miRTarBase) MIMAT0003393		0.75
validated miRTarBase	6284	1480	23622248	6204	hsa-miR-99b-5p	gene-gene-pos	+validated miRTarBase	0.75	23622248	false	gene-gene-pos	23622248	+validated miRTarBase	6204	RPS10	MIMAT0000689	hsa-miR-99b-5p	6204 (validated miRTarBase) MIMAT0000689		0.75
validated miRTarBase	6275	8404.05	23622248	6187	hsa-miR-34a-5p	gene-gene-pos	+validated miRTarBase	0.75	23622248	false	gene-gene-pos	23622248	+validated miRTarBase	6187	RPS2	MIMAT0000255	hsa-miR-34a-5p	6187 (validated miRTarBase) MIMAT0000255		0.75
validated miRTarBase	6278	7216.48	23622248	6187	hsa-miR-99b-5p	gene-gene-pos	+validated miRTarBase	0.75	23622248	false	gene-gene-pos	23622248	+validated miRTarBase	6187	RPS2	MIMAT0000689	hsa-miR-99b-5p	6187 (validated miRTarBase) MIMAT0000689		0.75
validated miRTarBase	6287	1480	20371350|23313552	6227	hsa-miR-425-5p	gene-gene-pos	+validated miRTarBase	0.75	20371350|23313552	false	gene-gene-pos	20371350|23313552	+validated miRTarBase	6227	RPS21	MIMAT0003393	hsa-miR-425-5p	6227 (validated miRTarBase) MIMAT0003393		0.75
validated miRTarBase	6290	1480	23622248	6234	hsa-miR-425-5p	gene-gene-pos	+validated miRTarBase	0.75	23622248	false	gene-gene-pos	23622248	+validated miRTarBase	6234	RPS28	MIMAT0003393	hsa-miR-425-5p	6234 (validated miRTarBase) MIMAT0003393		0.75
validated miRTarBase	4595	1480	23622248	10670	hsa-miR-34a-5p	gene-gene-pos	+validated miRTarBase	0.75	23622248	false	gene-gene-pos	23622248	+validated miRTarBase	10670	RRAGA	MIMAT0000255	hsa-miR-34a-5p	10670 (validated miRTarBase) MIMAT0000255		0.75
validated miRTarBase	6293	9303.39	21566225	6241	hsa-miR-34a-5p	gene-gene-pos	+validated miRTarBase	0.75	21566225	false	gene-gene-pos	21566225	+validated miRTarBase	6241	RRM2	MIMAT0000255	hsa-miR-34a-5p	6241 (validated miRTarBase) MIMAT0000255		0.75
validated miRTarBase	6296	8565.12	23622248	6241	hsa-miR-425-5p	gene-gene-pos	+validated miRTarBase	0.75	23622248	false	gene-gene-pos	23622248	+validated miRTarBase	6241	RRM2	MIMAT0003393	hsa-miR-425-5p	6241 (validated miRTarBase) MIMAT0003393		0.75
validated miRTarBase	5168	1480	21566225	23076	hsa-miR-34a-5p	gene-gene-pos	+validated miRTarBase	0.75	21566225	false	gene-gene-pos	21566225	+validated miRTarBase	23076	RRP1B	MIMAT0000255	hsa-miR-34a-5p	23076 (validated miRTarBase) MIMAT0000255		0.75
validated miRTarBase	5405	1480	23446348	26071	hsa-miR-34a-5p	gene-gene-pos	+validated miRTarBase	0.75	23446348	false	gene-gene-pos	23446348	+validated miRTarBase	26071	RTL8A	MIMAT0000255	hsa-miR-34a-5p	26071 (validated miRTarBase) MIMAT0000255		0.75
validated miRTarBase	6140	1480	23622248	55680	hsa-miR-425-5p	gene-gene-pos	+validated miRTarBase	0.75	23622248	false	gene-gene-pos	23622248	+validated miRTarBase	55680	RUFY2	MIMAT0003393	hsa-miR-425-5p	55680 (validated miRTarBase) MIMAT0003393		0.75
validated miRTarBase	5300	1480	23622248	23623	hsa-miR-425-5p	gene-gene-pos	+validated miRTarBase	0.75	23622248	false	gene-gene-pos	23622248	+validated miRTarBase	23623	RUSC1	MIMAT0003393	hsa-miR-425-5p	23623 (validated miRTarBase) MIMAT0003393		0.75
validated miRTarBase	4712	1480	20371350|22012620	112611	hsa-miR-34a-5p	gene-gene-pos	+validated miRTarBase	0.75	20371350|22012620	false	gene-gene-pos	20371350|22012620	+validated miRTarBase	112611	RWDD2A	MIMAT0000255	hsa-miR-34a-5p	112611 (validated miRTarBase) MIMAT0000255		0.75
validated miRTarBase	5711	1480	19536157	344658	hsa-miR-136-5p	gene-gene-pos	+validated miRTarBase	0.75	19536157	false	gene-gene-pos	19536157	+validated miRTarBase	344658	SAMD7	MIMAT0000448	hsa-miR-136-5p	344658 (validated miRTarBase) MIMAT0000448		0.75
validated miRTarBase	5231	1480	20371350|21572407|23446348|23824327	23314	hsa-miR-34a-5p	gene-gene-pos	+validated miRTarBase	0.75	20371350|21572407|23446348|23824327	false	gene-gene-pos	20371350|21572407|23446348|23824327	+validated miRTarBase	23314	SATB2	MIMAT0000255	hsa-miR-34a-5p	23314 (validated miRTarBase) MIMAT0000255		0.75
validated miRTarBase	6746	1480	24374217	950	hsa-miR-136-5p	gene-gene-pos	+validated miRTarBase	0.75	24374217	false	gene-gene-pos	24374217	+validated miRTarBase	950	SCARB2	MIMAT0000448	hsa-miR-136-5p	950 (validated miRTarBase) MIMAT0000448		0.75
validated miRTarBase	6092	1480	19536157	54949	hsa-miR-425-5p	gene-gene-pos	+validated miRTarBase	0.75	19536157	false	gene-gene-pos	19536157	+validated miRTarBase	54949	SDHAF2	MIMAT0003393	hsa-miR-425-5p	54949 (validated miRTarBase) MIMAT0003393		0.75
[truncated: 154 more rows]

## Sheet: miR Targets
Summary Results CluePedia MTI Analysis
Cluster #1 up		Cluster #2 down		Interest proteins
[truncated: 608 more rows]

## Sheet: ClueGO Results
ID	Term	Ontology Source	Term PValue	Term PValue Corrected with Bonferroni step down	% Associated Genes	Nr. Genes	Cluster	Genes Cluster #1	Genes Cluster #2	%Genes Cluster #1	%Genes Cluster #2	%Genes Cluster #1.adjusted.to.input.list.size	%Genes Cluster #2.adjusted.to.input.list.size	Associated Genes Found
[truncated: 185 more rows]

[truncated: 3 more sheets: Selected PPI MTI input, PPI MTI nodo, PPI MTI edge]
